# Supplementary material
Source: publisher figshare collection journal article supplement (https://karger.figshare.com/articles/dataset/_/19221165)
Supplement: Supplementary file [file 1]

| Ion Index | Database ID                       | Top-Name                    | Sum Formula | Detected Mass | Reliable.Ion |
|-----------|-----------------------------------|-----------------------------|-------------|---------------|--------------|
| 1         | HMDB0041822; C01471; CHEBI:15368  | Acrolein                    | C3H4O       | 55.01823771   | No           |
| 6         | HMDB0001659; C00207; CHEBI:15347  | Acetone                     | C3H6O       | 57.03406158   | No           |
| 6         | HMDB0003366; C00479; CHEBI:17153  | Propanal                    | C3H6O       | 57.03406158   | No           |
| 6         | HMDB0031558; C15508; CHEBI:38685  | Methyloxirane               | C3H6O       | 57.03406158   | No           |
| 6         | HMDB0031652; C02001; CHEBI:16605  | Allyl alcohol               | C3H6O       | 57.03406158   | No           |
| 11        | HMDB0001122; C11489; CHEBI:7438   | N-Methylformamide           | C2H5NO      | 58.02895255   | No           |
| 11        | HMDB0003656; C02658; CHEBI:50718  | Acetaldehyde oxime          | C2H5NO      | 58.02895255   | No           |
| 11        | HMDB0031645; C06244; CHEBI:27856  | Acetamide                   | C2H5NO      | 58.02895255   | No           |
| 12        | HMDB0001842; C17349; CHEBI:42820  | Guanidine                   | CH5N3       | 58.04033157   | No           |
| 15        | HMDB0000042; C00033; CHEBI:15366  | Acetic acid                 | C2H4O2      | 59.01330173   | Yes          |
| 15        | HMDB0003344; C00266; CHEBI:17071  | Glycolaldehyde              | C2H4O2      | 59.01330173   | Yes          |
| 18        | HMDB0000820; C05979; CHEBI:28831  | Propyl alcohol              | C3H8O       | 59.04952873   | No           |
| 18        | HMDB0000863; C01845; CHEBI:17824  | Isopropyl alcohol           | C3H8O       | 59.04952873   | No           |
| 23        | HMDB0003538; C01353; CHEBI:28976  | Carbonic acid               | CH2O3       | 60.99255249   | No           |
| 29        | HMDB0031323                       | 3-Butenenitrile             | C4H5N       | 66.03463864   | No           |
| 29        | HMDB0035924; C19907; CHEBI:19203  | Pyrrole                     | C4H5N       | 66.03463864   | No           |
| 30        | HMDB0006853; C06145; CHEBI:28180  | 3-Butyn-1-al                | C4H4O       | 67.01860567   | Yes          |
| 30        | HMDB0013785; C00089; CHEBI:17992  | Furan                       | C4H4O       | 67.01860567   | Yes          |
| 31        | HMDB0001525; C01589; CHEBI:16069  | Imidazole                   | C3H4N2      | 67.02982178   | No           |
| 39        | HMDB0034233                       | (E)-2-Butenal               | C4H6O       | 69.03439741   | No           |
| 39        | HMDB00061873; CHEBI:48058         | 3-Buten-2-one               | C4H6O       | 69.03439741   | No           |
| 39        | HMDB0061874                       | Methacrolein                | C4H6O       | 69.03439741   | No           |
| 40        | HMDB0004296; C01659; CHEBI:28619  | Acrylamide                  | C3H5NO      | 70.02953081   | No           |
| 42        | HMDB0001167; C00546; CHEBI:17158  | Pyruvaldehyde               | C3H4O2      | 71.01354279   | No           |
| 42        | HMDB0006112; C19440; CHEBI:566274 | Malondialdehyde             | C3H4O2      | 71.01354279   | No           |
| 42        | HMDB0031647; C00511; CHEBI:18308  | Acrylic acid                | C3H4O2      | 71.01354279   | No           |
| 43        | HMDB0000246; CHEBI:26911          | Tetrahydrofuran             | C4H8O       | 71.0498917    | No           |
| 43        | HMDB0000474; C02845; CHEBI:28398  | Butanone                    | C4H8O       | 71.0498917    | No           |
| 43        | HMDB0003543; C01412; CHEBI:15743  | Butanal                     | C4H8O       | 71.0498917    | No           |
| 43        | HMDB0031243; C03219; CHEBI:48943  | 2-Methylpropanal            | C4H8O       | 71.0498917    | No           |
| 43        | HMDB0031324                       | 3-Buten-1-ol                | C4H8O       | 71.0498917    | No           |
| 43        | HMDB0033858                       | 2-Buten-1-ol                | C4H8O       | 71.0498917    | No           |
| 43        | HMDB0034431                       | 2,2-Dimethyloxirane         | C4H8O       | 71.0498917    | No           |
| 47        | HMDB0001106; C05665; CHEBI:18090  | 3-Aminopropionaldehyde      | C3H7NO      | 72.04524358   | No           |
| 47        | HMDB0001888; C03134; CHEBI:17741  | N,N-Dimethylformamide       | C3H7NO      | 72.04524358   | No           |
| 47        | HMDB0002134; C01888; CHEBI:17906  | Aminoacetone                | C3H7NO      | 72.04524358   | No           |
| 47        | HMDB0142435                       | 2-(methylamino)acetaldehyde | C3H7NO      | 72.04524358   | No           |
| 48        | HMDB0000119; C00048; CHEBI:16891  | Glyoxylic acid              | C2H2O3      | 72.99287163   | No           |
| 49        | HMDB0031635                       | 2-Propene-1-thiol           | C3H6S       | 73.01148359   | No           |
| 49        | HMDB0040345                       | 1-Propene-1-thiol           | C3H6S       | 73.01148359   | No           |
| 50        | HMDB0000237; C00163; CHEBI:30768  | Propionic acid              | C3H6O2      | 73.02933072   | No           |
| 50        | HMDB0003052; C00424; CHEBI:18041  | Lactaldehyde                | C3H6O2      | 73.02933072   | No           |
| 50        | HMDB0003453; C00969; CHEBI:17871  | 3-Hydroxypropanal           | C3H6O2      | 73.02933072   | No           |
| 50        | HMDB0006458; C00937; CHEBI:17167  | D-Lactaldehyde              | C3H6O2      | 73.02933072   | No           |
| 50        | HMDB0006961; C05235; CHEBI:27957  | Hydroxyacetone              | C3H6O2      | 73.02933072   | No           |
| 50        | HMDB0031229; CHEBI:52342          | Ethyl formate               | C3H6O2      | 73.02933072   | No           |
| 50        | HMDB0031523; C17530               | Methyl acetate              | C3H6O2      | 73.02933072   | No           |
| 52        | HMDB0000123; C00037; CHEBI:15428  | Glycine                     | C2H5NO2     | 74.02406512   | No           |
| 52        | HMDB0014691; C06808; CHEBI:27777  | Acetohydroxamic Acid        | C2H5NO2     | 74.02406512   | No           |
| 52        | HMDB0031239                       | Ethyl nitrite               | C2H5NO2     | 74.02406512   | No           |
| 54        | HMDB0000115; C00160; CHEBI:17497  | Glycolic acid               | C2H4O3      | 75.00856935   | No           |
| 54        | HMDB0031608                       | Peracetic acid              | C2H4O3      | 75.00856935   | No           |
| 57        | HMDB0002991; C01678; CHEBI:17141  | Cysteamine                  | C2H7NS      | 76.02257138   | No           |
| 62        | HMDB0001505; C01407; CHEBI:16716  | Benzene                     | C6H6        | 77.03899612   | No           |
| 68        | HMDB0000926; C00747; CHEBI:16227  | Pyridine                    | C5H5N       | 78.03480809   | No           |
| 79        | HMDB0001033; C11481; CHEBI:17137  | Hydrogen sulfite            | HO3S        | 79.9572718    | No           |
| 86        | HMDB0013749; CHEBI:969439         | 2-Methylfuran               | C5H6O       | 81.03446392   | No           |
| 86        | HMDB0031597                       | 2,4-Pentadienal             | C5H6O       | 81.03446392   | No           |
| 95        | HMDB0004363; C06195; CHEBI:51023  | Imidazolone                 | C3H4N2O     | 83.02511764   | No           |

|     |                                  |                                                     |         |             |     |
|-----|----------------------------------|-----------------------------------------------------|---------|-------------|-----|
| 98  | HMDB0001184                      | Methyl propenyl ketone                              | C5H8O   | 83.05016892 | No  |
| 98  | HMDB0012157; C07330; CHEBI:15825 | 3-Methyl-2-butenal                                  | C5H8O   | 83.05016892 | No  |
| 98  | HMDB0031407; C00557; CHEBI:16486 | Cyclopentanone                                      | C5H8O   | 83.05016892 | No  |
| 98  | HMDB0031512; CHEBI:88419         | Tiglic aldehyde                                     | C5H8O   | 83.05016892 | No  |
| 98  | HMDB0031530                      | 3-Methyl-3-buten-2-one                              | C5H8O   | 83.05016892 | No  |
| 98  | HMDB0031601                      | 2-Pentenal                                          | C5H8O   | 83.05016892 | No  |
| 98  | HMDB0031606; CHEBI:87508         | 4-Penten-2-one                                      | C5H8O   | 83.05016892 | No  |
| 98  | HMDB0031607                      | 1-Penten-3-one                                      | C5H8O   | 83.05016892 | No  |
| 98  | HMDB0032458                      | 4-Pentenal                                          | C5H8O   | 83.05016892 | No  |
| 98  | HMDB0037788; CHEBI:51679         | xi-2,3-Dihydro-3-methylfuran                        | C5H8O   | 83.05016892 | No  |
| 98  | HMDB0040584; CHEBI:51678         | 2,3-Dihydro-4-methylfuran                           | C5H8O   | 83.05016892 | No  |
| 101 | HMDB0002039; C11118; CHEBI:36592 | 2-Pyrrolidinone                                     | C4H7NO  | 84.04550518 | No  |
| 101 | HMDB0060427; CHEBI:15348         | Acetone cyanohydrin                                 | C4H7NO  | 84.04550518 | No  |
| 105 | HMDB0033875                      | 2,3-Dihydrothiophene                                | C4H6S   | 85.01271236 | No  |
| 105 | HMDB0033922                      | Divinyl sulfide                                     | C4H6S   | 85.01271236 | No  |
| 106 | HMDB0000549; C01770; CHEBI:42639 | Gamma-Butyrolactone                                 | C4H6O2  | 85.02930871 | No  |
| 106 | HMDB0002523                      | Oxolan-3-one                                        | C4H6O2  | 85.02930871 | No  |
| 106 | HMDB0003407; C00741; CHEBI:16583 | Diacetyl                                            | C4H6O2  | 85.02930871 | No  |
| 106 | HMDB0010720; C01771; CHEBI:41131 | But-2-enoic acid                                    | C4H6O2  | 85.02930871 | No  |
| 106 | HMDB0031209; C19309; CHEBI:46916 | Ethenyl acetate                                     | C4H6O2  | 85.02930871 | No  |
| 106 | HMDB0033977; C19443              | Methyl acrylate                                     | C4H6O2  | 85.02930871 | No  |
| 106 | HMDB0034439; CHEBI:36253         | Isocrotonic acid                                    | C4H6O2  | 85.02930871 | No  |
| 107 | HMDB0006478; C07329; CHEBI:16638 | Iso-Valeraldehyde                                   | C5H10O  | 85.06583185 | No  |
| 107 | HMDB0030124; C01390; CHEBI:16019 | Prenol                                              | C5H10O  | 85.06583185 | No  |
| 107 | HMDB0030126; CHEBI:62898         | 3-Methyl-3-buten-1-ol                               | C5H10O  | 85.06583185 | No  |
| 107 | HMDB0031206; CHEBI:121517        | Pentanal                                            | C5H10O  | 85.06583185 | No  |
| 107 | HMDB0031525; CHEBI:88414         | (S)-2-Methylbutanal                                 | C5H10O  | 85.06583185 | No  |
| 107 | HMDB0031526; C02223; CHEBI:16182 | (±)-2-Methylbutanal                                 | C5H10O  | 85.06583185 | No  |
| 107 | HMDB0031604                      | (E)-2-Penten-1-ol                                   | C5H10O  | 85.06583185 | No  |
| 107 | HMDB0031605                      | 1-Penten-3-ol                                       | C5H10O  | 85.06583185 | No  |
| 107 | HMDB0033854; CHEBI:132752        | Isoprenyl alcohol                                   | C5H10O  | 85.06583185 | No  |
| 107 | HMDB0034235; C01949; CHEBI:16472 | 2-Pentanone                                         | C5H10O  | 85.06583185 | No  |
| 107 | HMDB0034465                      | 2-Methyl-2-buten-1-ol                               | C5H10O  | 85.06583185 | No  |
| 107 | HMDB0039779                      | xi-3-Methyl-3-buten-2-ol                            | C5H10O  | 85.06583185 | No  |
| 110 | HMDB0003609; C02218; CHEBI:17123 | 2-Aminoacrylic acid                                 | C3H5NO2 | 86.02464259 | No  |
| 110 | HMDB0039426                      | 3-Isoxazolidinone                                   | C3H5NO2 | 86.02464259 | No  |
| 112 | HMDB0001080; C00555; CHEBI:17769 | 4-Aminobutyraldehyde                                | C4H9NO  | 86.06119331 | No  |
| 112 | HMDB0031215; CHEBI:87370         | N-Ethylacetamide                                    | C4H9NO  | 86.06119331 | No  |
| 112 | HMDB0031581; C14452; CHEBI:34856 | Morpholine                                          | C4H9NO  | 86.06119331 | No  |
| 112 | HMDB0033870; CHEBI:50724         | Butyramide                                          | C4H9NO  | 86.06119331 | No  |
| 112 | HMDB00142479                     | 2-(dimethylamino)acetaldehyde                       | C4H9NO  | 86.06119331 | No  |
| 114 | HMDB0000243; C00022; CHEBI:32816 | Pyruvic acid                                        | C3H4O3  | 87.00871685 | Yes |
| 114 | HMDB0011111; C00222; CHEBI:17960 | Malonic semialdehyde                                | C3H4O3  | 87.00871685 | Yes |
| 114 | HMDB0040261                      | Glucosereductone                                    | C3H4O3  | 87.00871685 | Yes |
| 114 | HMDB0062676; CHEBI:86354         | 2-hydroxyacrylic Acid                               | C3H4O3  | 87.00871685 | Yes |
| 115 | HMDB0000039; C00246; CHEBI:30772 | Butyric acid                                        | C4H8O2  | 87.04513658 | No  |
| 115 | HMDB0001873; C02632; CHEBI:16135 | Isobutyric acid                                     | C4H8O2  | 87.04513658 | No  |
| 115 | HMDB0003243; C00466; CHEBI:15688 | Acetoin                                             | C4H8O2  | 87.04513658 | No  |
| 115 | HMDB0030062                      | Methyl propionate                                   | C4H8O2  | 87.04513658 | No  |
| 115 | HMDB0031217; C00849; CHEBI:27750 | Ethyl acetate                                       | C4H8O2  | 87.04513658 | No  |
| 115 | HMDB0031507                      | 1-Hydroxy-2-butanone                                | C4H8O2  | 87.04513658 | No  |
| 115 | HMDB0040253                      | Propyl formate                                      | C4H8O2  | 87.04513658 | No  |
| 115 | HMDB0040579                      | Isopropyl formate                                   | C4H8O2  | 87.04513658 | No  |
| 116 | HMDB0143055                      | (hydroxymethylidene)carbamic acid                   | C2H3NO3 | 88.00376349 | No  |
| 118 | HMDB0000056; C00099; CHEBI:16958 | Beta-Alanine                                        | C3H7NO2 | 88.04057358 | No  |
| 118 | HMDB0000161; C00041; CHEBI:16977 | L-Alanine                                           | C3H7NO2 | 88.04057358 | No  |
| 118 | HMDB0000271; C00213; CHEBI:15611 | Sarcosine                                           | C3H7NO2 | 88.04057358 | No  |
| 118 | HMDB0001310; C00133; CHEBI:15570 | D-Alanine                                           | C3H7NO2 | 88.04057358 | No  |
| 118 | HMDB0031219; C01537; CHEBI:17967 | Ethyl carbamate                                     | C3H7NO2 | 88.04057358 | No  |
| 118 | HMDB0062251; C01401; CHEBI:16449 | (alpha-D-mannosyl)7-beta-D-mannosyl-diacetylchitobi | C3H7NO2 | 88.04057358 | No  |
| 119 | HMDB0002329; C00209; CHEBI:16995 | Oxalic acid                                         | C2H2O4  | 88.98799467 | No  |

|     |                                       |                                      |         |             |     |
|-----|---------------------------------------|--------------------------------------|---------|-------------|-----|
| 120 | HMDB0030025                           | 1-Mercapto-2-propanone               | C3H6OS  | 89.00674682 | No  |
| 120 | HMDB0031189; CHEBI:51280              | S-Methyl thioacetate                 | C3H6OS  | 89.00674682 | No  |
| 120 | HMDB0031636                           | (E)-1-Propene-1-sulfenic acid        | C3H6OS  | 89.00674682 | No  |
| 120 | HMDB0031718; CHEBI:50716              | (Methylthio)acetaldehyde             | C3H6OS  | 89.00674682 | No  |
| 120 | HMDB0040346; C08389; CHEBI:8475       | Thial-1-Propene-1-thiol S-oxide      | C3H6OS  | 89.00674682 | No  |
| 122 | HMDB0000190; HMDB0062492; C00186; CHI | L-Lactic acid                        | C3H6O3  | 89.0242228  | No  |
| 122 | HMDB0000700; C01013; CHEBI:33404      | Hydroxypropionic acid                | C3H6O3  | 89.0242228  | No  |
| 122 | HMDB0001051; C02154; CHEBI:5445       | Glyceraldehyde                       | C3H6O3  | 89.0242228  | No  |
| 122 | HMDB0001311; C00256; CHEBI:341        | D-Lactic acid                        | C3H6O3  | 89.0242228  | No  |
| 122 | HMDB0001882; C00184; CHEBI:16016      | Dihydroxyacetone                     | C3H6O3  | 89.0242228  | No  |
| 122 | HMDB0029580; CHEBI:36596              | Dimethyl carbonate                   | C3H6O3  | 89.0242228  | No  |
| 122 | HMDB0031232; CHEBI:50849              | Monoethyl carbonate                  | C3H6O3  | 89.0242228  | No  |
| 122 | HMDB0041929; CHEBI:132098             | Methoxyacetic acid                   | C3H6O3  | 89.0242228  | No  |
| 122 | HMDB0144295                           | 2-hydroxypropanoic acid              | C3H6O3  | 89.0242228  | No  |
| 123 | HMDB0031245                           | 2-Methyl-1-propanethiol              | C4H10S  | 89.04395    | No  |
| 123 | HMDB0031322                           | 1-Butanethiol                        | C4H10S  | 89.04395    | No  |
| 123 | HMDB0031666; C02272; CHEBI:27710      | Diethyl sulfide                      | C4H10S  | 89.04395    | No  |
| 123 | HMDB0040576                           | 2-(Methylthio)propane                | C4H10S  | 89.04395    | No  |
| 123 | HMDB0061871                           | 1-(Methylthio)-propane               | C4H10S  | 89.04395    | No  |
| 126 | HMDB0034168; C01455; CHEBI:17578      | Toluene                              | C7H8    | 91.05507469 | No  |
| 128 | HMDB0003012; C00292; CHEBI:17296      | Aniline                              | C6H7N   | 92.05082483 | No  |
| 128 | HMDB0061887; CHEBI:39922              | 3-Methylpyridine                     | C6H7N   | 92.05082483 | No  |
| 128 | HMDB0061888; C14447; CHEBI:50415      | 2-Methylpyridine                     | C6H7N   | 92.05082483 | No  |
| 132 | HMDB0000228; C00146; CHEBI:15882      | Phenol                               | C6H6O   | 93.03465738 | Yes |
| 133 | HMDB0033112                           | Methylpyrazine                       | C5H6N2  | 93.04544107 | No  |
| 136 | HMDB0013751; C02502; CHEBI:16540      | 2-Hydroxypyridine                    | C5H5NO  | 94.03005126 | Yes |
| 136 | HMDB0036057; CHEBI:59978              | 1H-Pyrrole-2-carboxaldehyde          | C5H5NO  | 94.03005126 | Yes |
| 144 | HMDB0032914; C14279                   | 2-Furancarboxaldehyde                | C5H4O2  | 95.01383545 | No  |
| 144 | HMDB0060503; CHEBI:28906              | Protoanemonin                        | C5H4O2  | 95.01383545 | No  |
| 148 | HMDB0031545                           | 2-Methyl-2-cyclopenten-1-one         | C6H8O   | 95.05022735 | No  |
| 148 | HMDB0031546                           | 3-Methyl-2-cyclopenten-1-one         | C6H8O   | 95.05022735 | No  |
| 148 | HMDB0032965                           | 2,4-Dimethylfuran                    | C6H8O   | 95.05022735 | No  |
| 148 | HMDB0033182                           | 2,5-Dimethylfuran                    | C6H8O   | 95.05022735 | No  |
| 148 | HMDB0034729                           | (E,E)-2,4-Hexadienal                 | C6H8O   | 95.05022735 | No  |
| 148 | HMDB0040587                           | 2-Ethylfuran                         | C6H8O   | 95.05022735 | No  |
| 148 | HMDB0040588                           | 3-Ethylfuran                         | C6H8O   | 95.05022735 | No  |
| 157 | HMDB0031339; CHEBI:1178473            | 1-Cyano-2-hydroxy-3-butene           | C5H7NO  | 96.04548441 | No  |
| 157 | HMDB0032968                           | 2,4-Dimethyloxazole                  | C5H7NO  | 96.04548441 | No  |
| 157 | HMDB0032969                           | 2,5-Dimethyloxazole                  | C5H7NO  | 96.04548441 | No  |
| 157 | HMDB0032970                           | 4,5-Dimethyloxazole                  | C5H7NO  | 96.04548441 | No  |
| 167 | HMDB0013742; CHEBI:207496             | 2-Furanmethanol                      | C5H6O2  | 97.02953838 | Yes |
| 167 | HMDB0029609; CHEBI:36436              | 5-Methyl-2(3H)-furanone              | C5H6O2  | 97.02953838 | Yes |
| 167 | HMDB0040145                           | 5-Hydroxy-4-pentenoic acid d-lactone | C5H6O2  | 97.02953838 | Yes |
| 179 | HMDB0005843; C19317; CHEBI:494804     | Allyl isothiocyanate                 | C4H5NS  | 98.00713126 | No  |
| 179 | HMDB0029755                           | 3-Thiocyanato-1-propene              | C4H5NS  | 98.00713126 | No  |
| 179 | HMDB0033116; CHEBI:35626              | 4-Methylthiazole                     | C4H5NS  | 98.00713126 | No  |
| 179 | HMDB0033117                           | 5-Methylthiazole                     | C4H5NS  | 98.00713126 | No  |
| 179 | HMDB0038624                           | Thiiraneacetonitrile                 | C4H5NS  | 98.00713126 | No  |
| 179 | HMDB0061872                           | Isothiocyanatocyclopropane           | C4H5NS  | 98.00713126 | No  |
| 181 | HMDB0030276                           | (R)-Dihydromaleimide                 | C4H5NO2 | 98.02484942 | No  |
| 184 | HMDB0011749; CHEBI:110273             | 2-Piperidinone                       | C5H9NO  | 98.0610988  | No  |
| 184 | HMDB0034587                           | 1-Pyrrolidinecarboxaldehyde          | C5H9NO  | 98.0610988  | No  |
| 184 | HMDB0040518                           | 2,5-Dihydro-2,4-dimethyloxazole      | C5H9NO  | 98.0610988  | No  |
| 184 | HMDB0060309; C18796; CHEBI:60908      | (2R)-2-Hydroxy-2-methylbutanenitrile | C5H9NO  | 98.0610988  | No  |
| 196 | HMDB0029555                           | 4,5-Dihydro-2-methylthiazole         | C4H7NS  | 100.0226254 | No  |
| 197 | HMDB0029387; C02926; CHEBI:17289      | L-3-Aminodihydro-2(3H)-furanone      | C4H7NO2 | 100.0405938 | No  |
| 197 | HMDB0029615; CHEBI:38108              | (S)-2-Azetidinecarboxylic acid       | C4H7NO2 | 100.0405938 | No  |
| 197 | HMDB0036458; C01234; CHEBI:18053      | 1-Aminocyclopropanecarboxylic acid   | C4H7NO2 | 100.0405938 | No  |
| 199 | HMDB0012815; C12455                   | 5-Aminopentanal                      | C5H11NO | 100.0766898 | No  |
| 199 | HMDB0062600; CHEBI:84287              | N-butylformamide                     | C5H11NO | 100.0766898 | No  |
| 204 | HMDB0000005; C00109; CHEBI:30831      | 2-Ketobutyric acid                   | C4H6O3  | 101.0245281 | No  |

|     |                                  |                                          |          |             |     |
|-----|----------------------------------|------------------------------------------|----------|-------------|-----|
| 204 | HMDB0000060; C00164; CHEBI:15344 | Acetoacetic acid                         | C4H6O3   | 101.0245281 | No  |
| 204 | HMDB0001172; C00349; CHEBI:16256 | 2-Methyl-3-oxopropanoic acid             | C4H6O3   | 101.0245281 | No  |
| 204 | HMDB0001259; C00232; CHEBI:16265 | Succinic acid semialdehyde               | C4H6O3   | 101.0245281 | No  |
| 204 | HMDB0002217; C06002; CHEBI:27821 | (S)-Methylmalonic acid semialdehyde      | C4H6O3   | 101.0245281 | No  |
| 204 | HMDB0003381; CHEBI:553775        | 4-Hydroxycrotonic acid                   | C4H6O3   | 101.0245281 | No  |
| 204 | HMDB0031646; CHEBI:36610         | Acetic anhydride                         | C4H6O3   | 101.0245281 | No  |
| 205 | HMDB0000718; C08262; CHEBI:28484 | Isovaleric acid                          | C5H10O2  | 101.060761  | No  |
| 205 | HMDB0000892; C00803; CHEBI:17418 | Valeric acid                             | C5H10O2  | 101.060761  | No  |
| 205 | HMDB0002176; C18319; CHEBI:37070 | Ethylmethylacetic acid                   | C5H10O2  | 101.060761  | No  |
| 205 | HMDB0030058; CHEBI:167460        | Ethyl propionate                         | C5H10O2  | 101.060761  | No  |
| 205 | HMDB0031175; CHEBI:137944        | Tetrahydro-2-furanmethanol               | C5H10O2  | 101.060761  | No  |
| 205 | HMDB0031241; CHEBI:1132558       | Isopropyl acetate                        | C5H10O2  | 101.060761  | No  |
| 205 | HMDB0031247                      | 2-Methylpropyl formate                   | C5H10O2  | 101.060761  | No  |
| 205 | HMDB0031249; CHEBI:73689         | Methyl isobutyrate                       | C5H10O2  | 101.060761  | No  |
| 205 | HMDB0031516                      | 3-Hydroxy-2-pentanone                    | C5H10O2  | 101.060761  | No  |
| 205 | HMDB0032230                      | 2,4-Dimethyl-1,3-dioxolane               | C5H10O2  | 101.060761  | No  |
| 205 | HMDB0032263; CHEBI:32026         | Ethylene oxide/propylene oxide copolymer | C5H10O2  | 101.060761  | No  |
| 205 | HMDB0033742; CHEBI:38655         | (S)-2-Methylbutanoic acid                | C5H10O2  | 101.060761  | No  |
| 205 | HMDB0033890                      | Methyl butyrate                          | C5H10O2  | 101.060761  | No  |
| 205 | HMDB0034237; CHEBI:40116         | Propyl acetate                           | C5H10O2  | 101.060761  | No  |
| 205 | HMDB0039799                      | Tetrahydro-2-methyl-3-furanol            | C5H10O2  | 101.060761  | No  |
| 205 | HMDB0040575; CHEBI:88514         | Butyl formate                            | C5H10O2  | 101.060761  | No  |
| 205 | HMDB0041992; CHEBI:45133         | Pivalic acid                             | C5H10O2  | 101.060761  | No  |
| 205 | HMDB0059678                      | 1-Hydroxy-2-pentanone                    | C5H10O2  | 101.060761  | No  |
| 215 | HMDB0000092; C01026; CHEBI:17724 | Dimethylglycine                          | C4H9NO2  | 102.0559958 | Yes |
| 215 | HMDB0000112; C00334; CHEBI:16865 | Gamma-Aminobutyric acid                  | C4H9NO2  | 102.0559958 | Yes |
| 215 | HMDB0000452; C02356; CHEBI:35619 | L-Alpha-aminobutyric acid                | C4H9NO2  | 102.0559958 | Yes |
| 215 | HMDB0000650; C02261; CHEBI:28797 | D-Alpha-aminobutyric acid                | C4H9NO2  | 102.0559958 | Yes |
| 215 | HMDB0001906; C03665; CHEBI:27971 | 2-Aminoisobutyric acid                   | C4H9NO2  | 102.0559958 | Yes |
| 215 | HMDB0002166; C03284; CHEBI:33094 | (S)-b-aminoisobutyric acid               | C4H9NO2  | 102.0559958 | Yes |
| 215 | HMDB0002299; C01205; CHEBI:16320 | (R)-b-aminoisobutyric acid               | C4H9NO2  | 102.0559958 | Yes |
| 215 | HMDB0003911; C05145; CHEBI:27389 | 3-Aminoisobutanoic acid                  | C4H9NO2  | 102.0559958 | Yes |
| 215 | HMDB0031329                      | Butyl nitrite                            | C4H9NO2  | 102.0559958 | Yes |
| 215 | HMDB0031654; CHEBI:37081         | 3-Aminobutanoic acid                     | C4H9NO2  | 102.0559958 | Yes |
| 215 | HMDB0038394                      | O-Acetyethanolamine                      | C4H9NO2  | 102.0559958 | Yes |
| 215 | HMDB0041945; C11735; CHEBI:15620 | N-Ethylglycine                           | C4H9NO2  | 102.0559958 | Yes |
| 215 | HMDB0094692; CHEBI:17519         | N-Methylalanine                          | C4H9NO2  | 102.0559958 | Yes |
| 222 | HMDB0000691; C00383; CHEBI:30794 | Malonic acid                             | C3H4O4   | 103.0036482 | No  |
| 222 | HMDB0001352; C00168; CHEBI:30841 | Hydroxypyruvic acid                      | C3H4O4   | 103.0036482 | No  |
| 222 | HMDB0006938; C01146; CHEBI:16992 | Tartronate semialdehyde                  | C3H4O4   | 103.0036482 | No  |
| 226 | HMDB0000008; C05984; CHEBI:1148  | 2-Hydroxybutyric acid                    | C4H8O3   | 103.0400162 | Yes |
| 226 | HMDB0000011; C01089; CHEBI:17066 | (R)-3-Hydroxybutyric acid                | C4H8O3   | 103.0400162 | Yes |
| 226 | HMDB0000023; C06001; CHEBI:37373 | (S)-3-Hydroxyisobutyric acid             | C4H8O3   | 103.0400162 | Yes |
| 226 | HMDB0000336                      | (R)-3-Hydroxyisobutyric acid             | C4H8O3   | 103.0400162 | Yes |
| 226 | HMDB0000357; C01089; CHEBI:20067 | 3-Hydroxybutyric acid                    | C4H8O3   | 103.0400162 | Yes |
| 226 | HMDB0000442; C03197; CHEBI:17290 | (S)-3-Hydroxybutyric acid                | C4H8O3   | 103.0400162 | Yes |
| 226 | HMDB0000710; C00989; CHEBI:30830 | 4-Hydroxybutyric acid                    | C4H8O3   | 103.0400162 | Yes |
| 226 | HMDB0000729; CHEBI:50129         | Alpha-Hydroxyisobutyric acid             | C4H8O3   | 103.0400162 | Yes |
| 226 | HMDB0031212; CHEBI:741468        | Ethoxyacetic acid                        | C4H8O3   | 103.0400162 | Yes |
| 226 | HMDB0059748                      | 2-Methyl-3-hydroxypropanoate             | C4H8O3   | 103.0400162 | Yes |
| 226 | HMDB0126088                      | 3-hydroxy-2-methylpropanoic acid         | C4H8O3   | 103.0400162 | Yes |
| 227 | HMDB0002006; C03401; CHEBI:16303 | 2,3-Diaminopropionic acid                | C3H8N2O2 | 103.0509394 | No  |
| 228 | HMDB0032457                      | 1-Pentanethiol                           | C5H12S   | 103.0592049 | No  |
| 228 | HMDB0033902                      | Isopentyl mercaptan                      | C5H12S   | 103.0592049 | No  |
| 228 | HMDB0035418                      | 2-Methyl-1-butanethiol                   | C5H12S   | 103.0592049 | No  |
| 228 | HMDB0036180                      | 3-Methyl-2-butanethiol                   | C5H12S   | 103.0592049 | No  |
| 228 | HMDB0041010                      | (±)-2-Pentanethiol                       | C5H12S   | 103.0592049 | No  |
| 232 | HMDB0000187; C00065; CHEBI:17115 | L-Serine                                 | C3H7NO3  | 104.0352484 | No  |
| 232 | HMDB0003406; C00740; CHEBI:16523 | D-Serine                                 | C3H7NO3  | 104.0352484 | No  |
| 232 | HMDB0062263; C00716; CHEBI:17822 | Protein serine                           | C3H7NO3  | 104.0352484 | No  |
| 236 | HMDB0031520; CHEBI:47872         | 2-Mercaptopropanoic acid                 | C3H6O2S  | 105.0014371 | No  |

|     |                                  |                                        |          |             |     |
|-----|----------------------------------|----------------------------------------|----------|-------------|-----|
| 236 | HMDB0041604; CHEBI:44111         | 3-Mercaptopropanoic acid               | C3H6O2S  | 105.0014371 | No  |
| 237 | HMDB0000139; C00258; CHEBI:32398 | Glyceric acid                          | C3H6O4   | 105.0191881 | No  |
| 237 | HMDB0006372; CHEBI:74324         | L-Glyceric acid                        | C3H6O4   | 105.0191881 | No  |
| 237 | HMDB0031818; CHEBI:33508         | D-2,3-Dihydroxypropanoic acid          | C3H6O4   | 105.0191881 | No  |
| 238 | HMDB0006115; C00193; CHEBI:17169 | Benzaldehyde                           | C7H6O    | 105.0346381 | No  |
| 240 | HMDB0034778; CHEBI:131388        | (2R*,3R*)-1,2,3-Butanetriol            | C4H10O3  | 105.055726  | No  |
| 240 | HMDB0061944                      | Trihydroxybutane                       | C4H10O3  | 105.055726  | No  |
| 241 | HMDB0059810; C07208; CHEBI:28488 | m-Xylene                               | C8H10    | 105.0709884 | No  |
| 241 | HMDB0059851; C07212; CHEBI:28063 | o-Xylene                               | C8H10    | 105.0709884 | No  |
| 241 | HMDB0059905; C07111; CHEBI:16101 | Ethylbenzene                           | C8H10    | 105.0709884 | No  |
| 241 | HMDB0059924; C06756; CHEBI:27417 | p-Xylene                               | C8H10    | 105.0709884 | No  |
| 245 | HMDB0029734; CHEBI:127904        | 3-Ethylpyridine                        | C7H9N    | 106.0663087 | No  |
| 245 | HMDB0032244                      | 2,4-Dimethylpyridine                   | C7H9N    | 106.0663087 | No  |
| 245 | HMDB0032972; CHEBI:32548         | 2,6-Dimethylpyridine                   | C7H9N    | 106.0663087 | No  |
| 245 | HMDB0033871; C15562; CHEBI:40538 | Benzylamine                            | C7H9N    | 106.0663087 | No  |
| 245 | HMDB0041965; C14403; CHEBI:66892 | O-Toluidine                            | C7H9N    | 106.0663087 | No  |
| 247 | HMDB0003364; C00472; CHEBI:16509 | Quinone                                | C6H4O2   | 107.0138181 | No  |
| 247 | HMDB0012133; C02351; CHEBI:17253 | 1,2-Benzoquinone                       | C6H4O2   | 107.0138181 | No  |
| 250 | HMDB0001858; C01468; CHEBI:17847 | p-Cresol                               | C7H8O    | 107.0503114 | Yes |
| 250 | HMDB0002048; C01467; CHEBI:17231 | m-Cresol                               | C7H8O    | 107.0503114 | Yes |
| 250 | HMDB0002055; C01542; CHEBI:28054 | o-Cresol                               | C7H8O    | 107.0503114 | Yes |
| 250 | HMDB0003119; C00556; CHEBI:17987 | Benzyl alcohol                         | C7H8O    | 107.0503114 | Yes |
| 250 | HMDB0033895; C01403; CHEBI:16579 | Anisole                                | C7H8O    | 107.0503114 | Yes |
| 255 | HMDB0001169; C02372; CHEBI:17602 | 4-Aminophenol                          | C6H7NO   | 108.0457737 | Yes |
| 255 | HMDB0035882; CHEBI:59981         | 2-Acetylpyrrole                        | C6H7NO   | 108.0457737 | Yes |
| 255 | HMDB0040582                      | 1-Methyl-2-pyrrolicarboxaldehyde       | C6H7NO   | 108.0457737 | Yes |
| 257 | HMDB0029722                      | 1,2,5-Trimethyl-1H-pyrrole             | C7H11N   | 108.0819608 | No  |
| 262 | HMDB0029726                      | 2-Vinylthiophene                       | C6H6S    | 109.0121418 | No  |
| 262 | HMDB0033746; CHEBI:48498         | Benzenethiol                           | C6H6S    | 109.0121418 | No  |
| 264 | HMDB0000957; C00090; CHEBI:18135 | Pyrocatechol                           | C6H6O2   | 109.0296735 | Yes |
| 264 | HMDB0002434; C00530; CHEBI:17594 | Hydroquinone                           | C6H6O2   | 109.0296735 | Yes |
| 264 | HMDB0031180                      | (E,E)-2,4-Hexadienedial                | C6H6O2   | 109.0296735 | Yes |
| 264 | HMDB0032037; C01751; CHEBI:27810 | 1,3-Benzenediol                        | C6H6O2   | 109.0296735 | Yes |
| 264 | HMDB0033002; C11115              | 5-Methyl-2-furancarboxaldehyde         | C6H6O2   | 109.0296735 | Yes |
| 264 | HMDB0033127; CHEBI:59983         | 2-Acetylfuran                          | C6H6O2   | 109.0296735 | Yes |
| 267 | HMDB0029721                      | 2,3,5-Trimethylfuran                   | C7H10O   | 109.0659084 | No  |
| 267 | HMDB0029728                      | 2-Ethyl-5-methylfuran                  | C7H10O   | 109.0659084 | No  |
| 267 | HMDB0031541                      | 3-Methyl-2-cyclohexen-1-one            | C7H10O   | 109.0659084 | No  |
| 267 | HMDB0040277                      | 2-Propylfuran                          | C7H10O   | 109.0659084 | No  |
| 267 | HMDB0040278                      | 2-Isopropylfuran                       | C7H10O   | 109.0659084 | No  |
| 267 | HMDB0061891                      | (E,Z)-2,4-Heptadienal                  | C7H10O   | 109.0659084 | No  |
| 271 | HMDB0004230; C05942; CHEBI:36751 | Pyrrole-2-carboxylic acid              | C5H5NO2  | 110.0252333 | Yes |
| 271 | HMDB0038175                      | 2-Acetyloxazole                        | C5H5NO2  | 110.0252333 | Yes |
| 274 | HMDB0031163                      | N-Acetyl-2,3-dihydro-1H-pyrrole        | C6H9NO   | 110.0614554 | No  |
| 274 | HMDB0031308; CHEBI:67125         | 5-Acetyl-3,4-dihydro-2H-pyrrole        | C6H9NO   | 110.0614554 | No  |
| 274 | HMDB0037837                      | 2-Ethyl-4-methyloxazole                | C6H9NO   | 110.0614554 | No  |
| 274 | HMDB0037838                      | 4-Ethyl-2-methyloxazole                | C6H9NO   | 110.0614554 | No  |
| 274 | HMDB0037858                      | 2-Ethyl-5-methyloxazole                | C6H9NO   | 110.0614554 | No  |
| 274 | HMDB0037859                      | 5-Ethyl-2-methyloxazole                | C6H9NO   | 110.0614554 | No  |
| 274 | HMDB0037863                      | 5-Ethyl-4-methyloxazole                | C6H9NO   | 110.0614554 | No  |
| 274 | HMDB0039584                      | 5-Imino-2-methyl-1-cyclopenten-1-ol    | C6H9NO   | 110.0614554 | No  |
| 274 | HMDB0040148                      | Trimethyloxazole                       | C6H9NO   | 110.0614554 | No  |
| 275 | HMDB0000870; C00388; CHEBI:18295 | Histamine                              | C5H9N3   | 110.0722345 | Yes |
| 275 | HMDB0014417; CHEBI:59170         | Betazole                               | C5H9N3   | 110.0722345 | Yes |
| 275 | HMDB0060263                      | Histamium                              | C5H9N3   | 110.0722345 | Yes |
| 280 | HMDB0029717; CHEBI:246417        | 2-Thiophenecarboxaldehyde              | C5H4OS   | 110.9910167 | No  |
| 281 | HMDB0000444; CHEBI:30846         | 3-Furoic acid                          | C5H4O3   | 111.0087886 | Yes |
| 281 | HMDB0000617; C01546; CHEBI:30845 | 2-Furoic acid                          | C5H4O3   | 111.0087886 | Yes |
| 281 | HMDB0032994                      | 3-Hydroxy-2H-pyran-2-one               | C5H4O3   | 111.0087886 | Yes |
| 281 | HMDB0039437                      | 2,3-Dihydroxy-2,4-cyclopentadien-1-one | C5H4O3   | 111.0087886 | Yes |
| 282 | HMDB0000300; C00106; CHEBI:17568 | Uracil                                 | C4H4N2O2 | 111.0199841 | Yes |

|     |                                  |                                   |          |             |     |
|-----|----------------------------------|-----------------------------------|----------|-------------|-----|
| 282 | HMDB0060760                      | 4-Carboxypyrazole                 | C4H4N2O2 | 111.0199841 | Yes |
| 284 | HMDB0001164; C04221; CHEBI:10702 | trans-1,2-Dihydrobenzene-1,2-diol | C6H8O2   | 111.0453147 | No  |
| 284 | HMDB0029581; CHEBI:38358         | (2E,4E)-2,4-Hexadienoic acid      | C6H8O2   | 111.0453147 | No  |
| 284 | HMDB0031344; C06105; CHEBI:41674 | 1,2-Cyclohexanedione              | C6H8O2   | 111.0453147 | No  |
| 284 | HMDB0031543                      | 3-Methyl-1,2-cyclopentanedione    | C6H8O2   | 111.0453147 | No  |
| 284 | HMDB0031759                      | (E)-4-Oxo-2-hexen-1-al            | C6H8O2   | 111.0453147 | No  |
| 284 | HMDB0032233                      | 2,5-Dimethyl-3(2H)-furanone       | C6H8O2   | 111.0453147 | No  |
| 284 | HMDB0033569                      | Syoyualdehyde                     | C6H8O2   | 111.0453147 | No  |
| 284 | HMDB0034247                      | 2-(Methoxymethyl)furan            | C6H8O2   | 111.0453147 | No  |
| 284 | HMDB0039778                      | xi-3,5-Dimethyl-2(5H)-furanone    | C6H8O2   | 111.0453147 | No  |
| 284 | HMDB0040260                      | 5,5-Dimethyl-2(5H)-furanone       | C6H8O2   | 111.0453147 | No  |
| 287 | HMDB0031483                      | (Z)-4-Heptenal                    | C7H12O   | 111.0815186 | No  |
| 287 | HMDB0031486                      | 3-Hepten-2-one                    | C7H12O   | 111.0815186 | No  |
| 287 | HMDB0031487; CHEBI:87582         | (E)-4-Hepten-2-one                | C7H12O   | 111.0815186 | No  |
| 287 | HMDB0031488                      | 2-Hepten-4-one                    | C7H12O   | 111.0815186 | No  |
| 287 | HMDB0031539                      | 2-Methylcyclohexanone             | C7H12O   | 111.0815186 | No  |
| 287 | HMDB0031540                      | 4-Methylcyclohexanone             | C7H12O   | 111.0815186 | No  |
| 287 | HMDB0031550                      | 5-Methyl-3-hexen-2-one            | C7H12O   | 111.0815186 | No  |
| 287 | HMDB0031551                      | 5-Methyl-5-hexen-2-one            | C7H12O   | 111.0815186 | No  |
| 287 | HMDB0032301                      | trans-2-trans-4-Heptadien-1-ol    | C7H12O   | 111.0815186 | No  |
| 287 | HMDB0033667                      | (R)-3-Methylcyclohexanone         | C7H12O   | 111.0815186 | No  |
| 287 | HMDB0033827                      | (2E)-2-Heptenal                   | C7H12O   | 111.0815186 | No  |
| 287 | HMDB0034372                      | xi-3-Methyl-3-cyclohexen-1-ol     | C7H12O   | 111.0815186 | No  |
| 287 | HMDB0040339                      | 2,5-Heptadien-1-ol                | C7H12O   | 111.0815186 | No  |
| 295 | HMDB0032974                      | 2,4-Dimethylthiazole              | C5H7NS   | 112.0230472 | No  |
| 295 | HMDB0032975                      | 2,5-Dimethylthiazole              | C5H7NS   | 112.0230472 | No  |
| 295 | HMDB0032976                      | 4,5-Dimethylthiazole              | C5H7NS   | 112.0230472 | No  |
| 295 | HMDB0033867                      | 4-Isothiocyanato-1-butene         | C5H7NS   | 112.0230472 | No  |
| 295 | HMDB0038460                      | Thiiranepropanenitrile            | C5H7NS   | 112.0230472 | No  |
| 295 | HMDB0040036                      | 2-Ethylthiazole                   | C5H7NS   | 112.0230472 | No  |
| 297 | HMDB0001301; C04322; CHEBI:1372  | 1-Pyrroline-5-carboxylic acid     | C5H7NO2  | 112.0392746 | No  |
| 297 | HMDB0006875; C03564; CHEBI:36761 | 1-Pyrroline-2-carboxylic acid     | C5H7NO2  | 112.0392746 | No  |
| 298 | HMDB0000562; C00791; CHEBI:16737 | Creatinine                        | C4H7N3O  | 112.0515817 | No  |
| 303 | HMDB0060293; CHEBI:5587          | Hydroxidodioxidosulfidosulfate    | H2O3S2   | 112.9373088 | No  |
| 307 | HMDB0032915                      | 2-Furanmethanethiol               | C5H6OS   | 113.0064262 | No  |
| 307 | HMDB0032993                      | 2-Thiophenemethanol               | C5H6OS   | 113.0064262 | No  |
| 307 | HMDB0036611                      | 2-Methyl-3-furanthiol             | C5H6OS   | 113.0064262 | No  |
| 307 | HMDB0039798                      | 5-Methyl-3-furanthiol             | C5H6OS   | 113.0064262 | No  |
| 307 | HMDB0041504                      | 3-Thiophenemethanol               | C5H6OS   | 113.0064262 | No  |
| 309 | HMDB0031859; CHEBI:74456         | Norfuraneol                       | C5H6O3   | 113.0244052 | Yes |
| 309 | HMDB0060461; CHEBI:28993         | cis-Acetylacrylate                | C5H6O3   | 113.0244052 | Yes |
| 310 | HMDB0000076; C00429; CHEBI:15901 | Dihydrouracil                     | C4H6N2O2 | 113.0355858 | Yes |
| 310 | HMDB0003646; C02565; CHEBI:16354 | N-Methylhydantoin                 | C4H6N2O2 | 113.0355858 | Yes |
| 310 | HMDB0060245; C02512; CHEBI:16934 | L-3-Cyanoalanine                  | C4H6N2O2 | 113.0355858 | Yes |
| 313 | HMDB0003671; C08380; CHEBI:5672  | 2-Heptanone                       | C7H14O   | 113.097112  | No  |
| 313 | HMDB0004814                      | 4-Heptanone                       | C7H14O   | 113.097112  | No  |
| 313 | HMDB0005841                      | Ethyl isobutyl ketone             | C7H14O   | 113.097112  | No  |
| 313 | HMDB0031405                      | (Z)-4-Hepten-1-ol                 | C7H14O   | 113.097112  | No  |
| 313 | HMDB0031429; CHEBI:87754         | 2,4-Dimethyl-3-pentanone          | C7H14O   | 113.097112  | No  |
| 313 | HMDB0031475; C14390              | Heptanal                          | C7H14O   | 113.097112  | No  |
| 313 | HMDB0031482; CHEBI:50139         | 3-Heptanone                       | C7H14O   | 113.097112  | No  |
| 313 | HMDB0031538                      | 3-Methylcyclohexanol              | C7H14O   | 113.097112  | No  |
| 313 | HMDB0031549                      | 5-Methyl-2-hexanone               | C7H14O   | 113.097112  | No  |
| 313 | HMDB0032405; CHEBI:88822         | 3-Methylhexanal                   | C7H14O   | 113.097112  | No  |
| 313 | HMDB0038052                      | 1-Ethoxy-3-methyl-2-butene        | C7H14O   | 113.097112  | No  |
| 313 | HMDB0040191                      | (±)-2-Methylhexanal               | C7H14O   | 113.097112  | No  |
| 313 | HMDB0041320                      | (2R,4Z)-4-Hepten-2-ol             | C7H14O   | 113.097112  | No  |
| 313 | HMDB0059693                      | 1-Methylcyclohexanol              | C7H14O   | 113.097112  | No  |
| 313 | HMDB0061896                      | 2-Methyl-3-hexanone               | C7H14O   | 113.097112  | No  |
| 322 | HMDB0029172; CHEBI:19680         | 3-keto-2-Methylbutyrate           | C5H7O3   | 114.0348459 | No  |
| 323 | HMDB0031328; CHEBI:50534         | 1-Isothiocyanatobutane            | C5H9NS   | 114.0389472 | No  |

|     |                                  |                                         |          |             |     |
|-----|----------------------------------|-----------------------------------------|----------|-------------|-----|
| 323 | HMDB0032345                      | Isobutyl isothiocyanate                 | C5H9NS   | 114.0389472 | No  |
| 323 | HMDB0040331                      | xi-2,5-Dihydro-2,4-dimethylthiazole     | C5H9NS   | 114.0389472 | No  |
| 324 | HMDB0000162; C00148; CHEBI:17203 | L-Proline                               | C5H9NO2  | 114.0559188 | No  |
| 324 | HMDB0003411; C00763; CHEBI:16313 | D-Proline                               | C5H9NO2  | 114.0559188 | No  |
| 324 | HMDB0012880; C18170; CHEBI:30322 | Acetamidopropanal                       | C5H9NO2  | 114.0559188 | No  |
| 324 | HMDB0030409                      | 4-Amino-2-methylenebutanoic acid        | C5H9NO2  | 114.0559188 | No  |
| 324 | HMDB0034208                      | Pterolactam                             | C5H9NO2  | 114.0559188 | No  |
| 325 | HMDB0031651                      | N-(3-Methylbutyl)acetamide              | C6H13NO  | 114.0924738 | No  |
| 325 | HMDB0034203                      | N-(2-Methylpropyl)acetamide             | C6H13NO  | 114.0924738 | No  |
| 330 | HMDB0000134; C00122; CHEBI:18012 | Fumaric acid                            | C4H4O4   | 115.0037642 | Yes |
| 330 | HMDB0000176; C01384; CHEBI:18300 | Maleic acid                             | C4H4O4   | 115.0037642 | Yes |
| 333 | HMDB0000019; C00141; CHEBI:16530 | Alpha-ketoisovaleric acid               | C5H8O3   | 115.0401488 | Yes |
| 333 | HMDB0000310                      | Methylacetoacetic acid                  | C5H8O3   | 115.0401488 | Yes |
| 333 | HMDB0000720; CHEBI:45630         | Levulinic acid                          | C5H8O3   | 115.0401488 | Yes |
| 333 | HMDB0001865; C06255; CHEBI:33033 | 2-Oxovaleric acid                       | C5H8O3   | 115.0401488 | Yes |
| 333 | HMDB0003771; CHEBI:37079         | 2-Methylacetoacetic acid                | C5H8O3   | 115.0401488 | Yes |
| 333 | HMDB0012233; C03273; CHEBI:39153 | Glutarate semialdehyde                  | C5H8O3   | 115.0401488 | Yes |
| 333 | HMDB0031643                      | Ethyl pyruvate                          | C5H8O3   | 115.0401488 | Yes |
| 333 | HMDB0034466                      | Acetoxyacetone                          | C5H8O3   | 115.0401488 | Yes |
| 333 | HMDB0128916                      | 4-hydroxy-3-methylbut-2-enoic acid      | C5H8O3   | 115.0401488 | Yes |
| 333 | HMDB0128917                      | dimethyloxirane-2-carboxylic acid       | C5H8O3   | 115.0401488 | Yes |
| 333 | HMDB0128943                      | (2E)-4-hydroxy-3-methylbut-2-enoic acid | C5H8O3   | 115.0401488 | Yes |
| 333 | HMDB0129096                      | (2Z)-2-(hydroxymethyl)but-2-enoic acid  | C5H8O3   | 115.0401488 | Yes |
| 333 | HMDB0129097                      | 4-hydroxy-2-methylbut-2-enoic acid      | C5H8O3   | 115.0401488 | Yes |
| 333 | HMDB0129098                      | 2,3-dimethyloxirane-2-carboxylic acid   | C5H8O3   | 115.0401488 | Yes |
| 333 | HMDB0132477                      | 2-(hydroxymethyl)but-2-enoic acid       | C5H8O3   | 115.0401488 | Yes |
| 335 | HMDB0000535; C01585; CHEBI:30776 | Caproic acid                            | C6H12O2  | 115.0763976 | No  |
| 335 | HMDB0000689; CHEBI:74903         | Isocaproic acid                         | C6H12O2  | 115.0763976 | No  |
| 335 | HMDB0029762                      | Methyl (S)-2-Methylbutanoate            | C6H12O2  | 115.0763976 | No  |
| 335 | HMDB0030027                      | Methyl 3-methylbutanoate                | C6H12O2  | 115.0763976 | No  |
| 335 | HMDB0030056                      | Isopropyl propionate                    | C6H12O2  | 115.0763976 | No  |
| 335 | HMDB0030059                      | Propyl propionate                       | C6H12O2  | 115.0763976 | No  |
| 335 | HMDB0031207                      | Methyl pentanoate                       | C6H12O2  | 115.0763976 | No  |
| 335 | HMDB0031221; CHEBI:410868        | 2-Ethylbutanoic acid                    | C6H12O2  | 115.0763976 | No  |
| 335 | HMDB0031246; CHEBI:50569         | 2-Methylpropyl acetate                  | C6H12O2  | 115.0763976 | No  |
| 335 | HMDB0031248; CHEBI:167422        | Ethyl 2-methylpropanoate                | C6H12O2  | 115.0763976 | No  |
| 335 | HMDB0031325; C12304; CHEBI:31328 | n-Butyl acetate                         | C6H12O2  | 115.0763976 | No  |
| 335 | HMDB0031511; CHEBI:55381         | Diacetone alcohol                       | C6H12O2  | 115.0763976 | No  |
| 335 | HMDB0031580                      | (±)-2-Methylpentanoic acid              | C6H12O2  | 115.0763976 | No  |
| 335 | HMDB0033774                      | 3-Methylpentanoic acid                  | C6H12O2  | 115.0763976 | No  |
| 335 | HMDB0033889                      | Ethyl butyrate                          | C6H12O2  | 115.0763976 | No  |
| 335 | HMDB0034163; C12293; CHEBI:31726 | 3-Methylbutyl formate                   | C6H12O2  | 115.0763976 | No  |
| 335 | HMDB0037266                      | 2,2,4-Trimethyl-1,3-dioxolane           | C6H12O2  | 115.0763976 | No  |
| 335 | HMDB0040279; CHEBI:87572         | 2,4,5-Trimethyl-1,3-dioxolane           | C6H12O2  | 115.0763976 | No  |
| 335 | HMDB0040327                      | Pentyl formate                          | C6H12O2  | 115.0763976 | No  |
| 341 | HMDB0002287                      | Homocysteine thiolactone                | C4H7NOS  | 116.0174696 | No  |
| 342 | HMDB0000532; CHEBI:40410         | Acetylglycine                           | C4H7NO3  | 116.0352377 | No  |
| 342 | HMDB0006454; C03508; CHEBI:40673 | L-2-Amino-3-oxobutanoic acid            | C4H7NO3  | 116.0352377 | No  |
| 342 | HMDB0012249; C00441; CHEBI:18051 | L-Aspartate-semialdehyde                | C4H7NO3  | 116.0352377 | No  |
| 343 | HMDB0000738; C00463; CHEBI:16881 | Indole                                  | C8H7N    | 116.0505866 | Yes |
| 343 | HMDB0034171; C16074; CHEBI:25979 | Benzeneacetoneitrile                    | C8H7N    | 116.0505866 | Yes |
| 344 | HMDB0000043; C00719; CHEBI:17750 | Betaine                                 | C5H11NO2 | 116.0715056 | Yes |
| 344 | HMDB0000883; C00183; CHEBI:16414 | L-Valine                                | C5H11NO2 | 116.0715056 | Yes |
| 344 | HMDB0001382; C07457; CHEBI:2691  | Vaporole                                | C5H11NO2 | 116.0715056 | Yes |
| 344 | HMDB0002141; CHEBI:134261        | N-Methyl-a-aminoisobutyric acid         | C5H11NO2 | 116.0715056 | Yes |
| 344 | HMDB0003355; C00431; CHEBI:15887 | 5-Aminopentanoic acid                   | C5H11NO2 | 116.0715056 | Yes |
| 344 | HMDB0013716; C01799; CHEBI:28804 | Norvaline                               | C5H11NO2 | 116.0715056 | Yes |
| 344 | HMDB0015550; C07457; CHEBI:55344 | Amyl Nitrite                            | C5H11NO2 | 116.0715056 | Yes |
| 348 | HMDB0039786                      | Dihydro-4-mercapto-3(2H)-furanone       | C4H6O2S  | 117.0014062 | No  |
| 350 | HMDB0000202; C02170; CHEBI:30860 | Methylmalonic acid                      | C4H6O4   | 117.0194662 | No  |
| 350 | HMDB0000254; C00042; CHEBI:15741 | Succinic acid                           | C4H6O4   | 117.0194662 | No  |

|     |                                  |                                            |         |             |     |
|-----|----------------------------------|--------------------------------------------|---------|-------------|-----|
| 350 | HMDB0000349; CHEBI:290972        | Erythrono-1,4-lactone                      | C4H6O4  | 117.0194662 | No  |
| 350 | HMDB0000940; CHEBI:71176         | Threonolactone                             | C4H6O4  | 117.0194662 | No  |
| 350 | HMDB0031204                      | 4-Hydroxy-2-oxobutanoic acid               | C4H6O4  | 117.0194662 | No  |
| 350 | HMDB0039324                      | xi-3-Hydroxy-2-oxobutanoic acid            | C4H6O4  | 117.0194662 | No  |
| 350 | HMDB0130020                      | 3-methoxy-3-oxopropanoic acid              | C4H6O4  | 117.0194662 | No  |
| 351 | HMDB0030968                      | 2,4,6-Octatriyn-1-ol                       | C8H6O   | 117.0341437 | No  |
| 351 | HMDB0032929; C14512; CHEBI:35260 | Benzofuran                                 | C8H6O   | 117.0341437 | No  |
| 351 | HMDB0038998                      | 3,5,7-Octatriyn-1-ol                       | C8H6O   | 117.0341437 | No  |
| 351 | HMDB0040549                      | xi-2,3-Octadiene-5,7-diyn-1-ol             | C8H6O   | 117.0341437 | No  |
| 352 | HMDB0033576                      | 7-Azaindolizine                            | C7H6N2  | 117.0458628 | No  |
| 352 | HMDB0040040                      | 5H-Cyclopentapyrazine                      | C7H6N2  | 117.0458628 | No  |
| 353 | HMDB0000351                      | 3-Hydroxy-2-methyl-[R-(R,S)]-butanoic acid | C5H10O3 | 117.0556028 | Yes |
| 353 | HMDB0000354; CHEBI:37051         | 2-Methyl-3-hydroxybutyric acid             | C5H10O3 | 117.0556028 | Yes |
| 353 | HMDB0000396; CHEBI:741550        | 2-Ethylhydracrylic acid                    | C5H10O3 | 117.0556028 | Yes |
| 353 | HMDB0000407; CHEBI:60645         | 2-Hydroxy-3-methylbutyric acid             | C5H10O3 | 117.0556028 | Yes |
| 353 | HMDB0000410                      | 3-Hydroxy-2-methyl-[S-(R,R)]-butanoic acid | C5H10O3 | 117.0556028 | Yes |
| 353 | HMDB0000531                      | 3-Hydroxyvaleric acid                      | C5H10O3 | 117.0556028 | Yes |
| 353 | HMDB0000642                      | Erythronilic acid                          | C5H10O3 | 117.0556028 | Yes |
| 353 | HMDB0000754; CHEBI:37084         | 3-Hydroxyisovaleric acid                   | C5H10O3 | 117.0556028 | Yes |
| 353 | HMDB0001863; CHEBI:60647         | 2-Hydroxyvaleric acid                      | C5H10O3 | 117.0556028 | Yes |
| 353 | HMDB0001987; CHEBI:68454         | 2-Hydroxy-2-methylbutyric acid             | C5H10O3 | 117.0556028 | Yes |
| 353 | HMDB0002011; CHEBI:384411        | 4-Hydroxyisovaleric acid                   | C5H10O3 | 117.0556028 | Yes |
| 353 | HMDB0040735; CHEBI:78321         | Ethyl lactate                              | C5H10O3 | 117.0556028 | Yes |
| 353 | HMDB0041603                      | Methyl 3-hydroxybutyrate                   | C5H10O3 | 117.0556028 | Yes |
| 353 | HMDB0059844                      | Diethyl carbonate                          | C5H10O3 | 117.0556028 | Yes |
| 353 | HMDB0061927; C02804; CHEBI:45564 | 5-Hydroxypentanoic acid                    | C5H10O3 | 117.0556028 | Yes |
| 353 | HMDB0062584; CHEBI:60631         | (S)-2-hydroxy-3-methylbutyric Acid         | C5H10O3 | 117.0556028 | Yes |
| 353 | HMDB0130836                      | 4-hydroxy-2-methylbutanoic acid            | C5H10O3 | 117.0556028 | Yes |
| 354 | HMDB0059837; CHEBI:37911         | Indane                                     | C9H10   | 117.0710574 | No  |
| 354 | HMDB0059899; C14395              | alpha-Methylstyrene                        | C9H10   | 117.0710574 | No  |
| 358 | HMDB0001147; C00872; CHEBI:17475 | Aminomalonic acid                          | C3H5NO4 | 118.0141636 | No  |
| 358 | HMDB0034259; C05669; CHEBI:16348 | Bovinoicidin                               | C3H5NO4 | 118.0141636 | No  |
| 360 | HMDB0062270; CHEBI:53806         | 1,2-Diacylglycerol-LD-PI-pool              | C7H5NO  | 118.0299475 | Yes |
| 362 | HMDB0000167; C00188; CHEBI:16857 | L-Threonine                                | C4H9NO3 | 118.0509218 | Yes |
| 362 | HMDB0000719; C00263; CHEBI:15699 | L-Homoserine                               | C4H9NO3 | 118.0509218 | Yes |
| 362 | HMDB0004041; C05519; CHEBI:28718 | L-Allothreonine                            | C4H9NO3 | 118.0509218 | Yes |
| 362 | HMDB0061148                      | Hydroxyethyl glycine                       | C4H9NO3 | 118.0509218 | Yes |
| 362 | HMDB0061877; CHEBI:16080         | 4-Amino-3-hydroxybutyrate                  | C4H9NO3 | 118.0509218 | Yes |
| 368 | HMDB0001368; C00957; CHEBI:16208 | 3-Mercaptopyruvic acid                     | C3H4O3S | 118.9805911 | No  |
| 369 | HMDB0001527; C08276; CHEBI:1438  | 3-Methylthiopropionic acid                 | C4H8O2S | 119.0170694 | No  |
| 369 | HMDB0035646; C03173; CHEBI:47870 | Methyl 2-(methylthio)acetate               | C4H8O2S | 119.0170694 | No  |
| 369 | HMDB0112255                      | Allyl methyl sulfone                       | C4H8O2S | 119.0170694 | No  |
| 371 | HMDB0000337; CHEBI:86371         | (S)-3,4-Dihydroxybutyric acid              | C4H8O4  | 119.0348558 | Yes |
| 371 | HMDB0000360; CHEBI:86348         | 2,4-Dihydroxybutanoic acid                 | C4H8O4  | 119.0348558 | Yes |
| 371 | HMDB0000498                      | 4-Deoxyerythronic acid                     | C4H8O4  | 119.0348558 | Yes |
| 371 | HMDB0002453; CHEBI:86391         | 4-Deoxythreonic acid                       | C4H8O4  | 119.0348558 | Yes |
| 371 | HMDB0002601; CHEBI:36532         | A,b-Dihydroxyisobutyric acid               | C4H8O4  | 119.0348558 | Yes |
| 371 | HMDB0002649; C01796; CHEBI:23956 | Erythrose                                  | C4H8O4  | 119.0348558 | Yes |
| 371 | HMDB0006293; C02045; CHEBI:27913 | L-Erythrulose                              | C4H8O4  | 119.0348558 | Yes |
| 372 | HMDB0004072; C05627; CHEBI:1883  | 4-Hydroxystyrene                           | C8H8O   | 119.0499415 | Yes |
| 372 | HMDB0006236; C00601; CHEBI:16424 | Phenylacetaldehyde                         | C8H8O   | 119.0499415 | Yes |
| 372 | HMDB0013815; CHEBI:87607         | 2,3-Dihydrobenzofuran                      | C8H8O   | 119.0499415 | Yes |
| 372 | HMDB0029636; C07214; CHEBI:27434 | 2-Methylbenzaldehyde                       | C8H8O   | 119.0499415 | Yes |
| 372 | HMDB0029637; C07209; CHEBI:28476 | 3-Methylbenzaldehyde                       | C8H8O   | 119.0499415 | Yes |
| 372 | HMDB0029638; C06758; CHEBI:28617 | 4-Methylbenzaldehyde                       | C8H8O   | 119.0499415 | Yes |
| 372 | HMDB0033910; C07113; CHEBI:27632 | Acetophenone                               | C8H8O   | 119.0499415 | Yes |
| 372 | HMDB0038997                      | Lentialexin                                | C8H8O   | 119.0499415 | Yes |
| 372 | HMDB0062765; C02083; CHEBI:17907 | Styrene Oxide                              | C8H8O   | 119.0499415 | Yes |
| 372 | HMDB0124943                      | 3-ethenylphenol                            | C8H8O   | 119.0499415 | Yes |
| 373 | HMDB0013733; C14533; CHEBI:34039 | 1,2,4-Trimethylbenzene                     | C9H12   | 119.0867278 | No  |
| 373 | HMDB0034029; C14396; CHEBI:34656 | Isopropylbenzene                           | C9H12   | 119.0867278 | No  |



|     |                                   |                                        |          |             |     |
|-----|-----------------------------------|----------------------------------------|----------|-------------|-----|
| 373 | HMDB0040458                       | 1,2,4-Tris(methylene)cyclohexane       | C9H12    | 119.0867278 | No  |
| 373 | HMDB0041924; C14508; CHEBI:34833  | Mesitylene                             | C9H12    | 119.0867278 | No  |
| 373 | HMDB0059819; C14572; CHEBI:34276  | o-Ethyltoluene                         | C9H12    | 119.0867278 | No  |
| 373 | HMDB0059848; C14522; CHEBI:77512  | m-Ethyl_toluene                        | C9H12    | 119.0867278 | No  |
| 373 | HMDB0059877; CHEBI:42630          | Propylbenzene                          | C9H12    | 119.0867278 | No  |
| 373 | HMDB0059901; C14518; CHEBI:34037  | Hemimellitene                          | C9H12    | 119.0867278 | No  |
| 381 | HMDB0000574; C00097; CHEBI:17561  | L-Cysteine                             | C3H7NO2S | 120.0124373 | No  |
| 381 | HMDB0003417; C00793; CHEBI:16375  | D-Cysteine                             | C3H7NO2S | 120.0124373 | No  |
| 385 | HMDB0004461; C09815; CHEBI:28179  | Benzamide                              | C7H7NO   | 120.0458101 | Yes |
| 385 | HMDB0033131                       | 3-Acetylpyridine                       | C7H7NO   | 120.0458101 | Yes |
| 385 | HMDB0035281                       | 2-Acetylpyridine                       | C7H7NO   | 120.0458101 | Yes |
| 387 | HMDB0001020; C02846; CHEBI:16269  | N,N-Dimethylaniline                    | C8H11N   | 120.0821703 | No  |
| 387 | HMDB0002017; C02455; CHEBI:670    | 1-Phenylethylamine                     | C8H11N   | 120.0821703 | No  |
| 387 | HMDB0012275; C05332; CHEBI:18397  | Phenylethylamine                       | C8H11N   | 120.0821703 | No  |
| 387 | HMDB0029729; CHEBI:481701         | 5-Ethyl-2-methylpyridine               | C8H11N   | 120.0821703 | No  |
| 387 | HMDB0032497                       | 2-Propylpyridine                       | C8H11N   | 120.0821703 | No  |
| 387 | HMDB0040041                       | 2-Ethyl-5-methylpyridine               | C8H11N   | 120.0821703 | No  |
| 387 | HMDB0060276                       | 2-Phenylethanaminium                   | C8H11N   | 120.0821703 | No  |
| 387 | HMDB0060677; C11004; CHEBI:28738  | 2,6-Dimethylaniline                    | C8H11N   | 120.0821703 | No  |
| 394 | HMDB0002127; C05823               | 3-Mercaptolactic acid                  | C3H6O3S  | 120.996193  | No  |
| 397 | HMDB0001870; C00180; CHEBI:30746  | Benzoic acid                           | C7H6O2   | 121.0291257 | Yes |
| 397 | HMDB0011718; C00633; CHEBI:17597  | 4-Hydroxybenzaldehyde                  | C7H6O2   | 121.0291257 | Yes |
| 397 | HMDB0032918                       | 3-(2-Furanyl)-2-propenal               | C7H6O2   | 121.0291257 | Yes |
| 397 | HMDB0034170; C06202; CHEBI:16008  | 2-Hydroxybenzaldehyde                  | C7H6O2   | 121.0291257 | Yes |
| 398 | HMDB0001406; C00153; CHEBI:17154  | Niacinamide                            | C6H6N2O  | 121.0407299 | No  |
| 398 | HMDB0031861                       | 2-Acetylpyrazine                       | C6H6N2O  | 121.0407299 | No  |
| 399 | HMDB0002994; C00503; CHEBI:17113  | Erythritol                             | C4H10O4  | 121.0517622 | No  |
| 399 | HMDB0004136; C16884; CHEBI:48300  | D-Threitol                             | C4H10O4  | 121.0517622 | No  |
| 399 | HMDB0094689; CHEBI:48299          | 1,2,3,4-Tetrahydroxybutane             | C4H10O4  | 121.0517622 | No  |
| 400 | HMDB0029306; C13637; CHEBI:49584  | 4-Ethylphenol                          | C8H10O   | 121.0660887 | No  |
| 400 | HMDB0030540; CHEBI:421375         | 2,5-Dimethylphenol                     | C8H10O   | 121.0660887 | No  |
| 400 | HMDB0032074                       | 1-Methoxy-2-methylbenzene              | C8H10O   | 121.0660887 | No  |
| 400 | HMDB0032076                       | 1-Methoxy-4-methylbenzene              | C8H10O   | 121.0660887 | No  |
| 400 | HMDB0032148                       | 2,3-Dimethylphenol                     | C8H10O   | 121.0660887 | No  |
| 400 | HMDB0032150                       | 2,6-Dimethylphenol                     | C8H10O   | 121.0660887 | No  |
| 400 | HMDB0032151; CHEBI:39839          | 3,4-Dimethylphenol                     | C8H10O   | 121.0660887 | No  |
| 400 | HMDB0032619; C07112; CHEBI:669    | 1-Phenylethanol                        | C8H10O   | 121.0660887 | No  |
| 400 | HMDB0033944; C05853; CHEBI:49000  | 2-Phenylethanol                        | C8H10O   | 121.0660887 | No  |
| 400 | HMDB0041609; C06757; CHEBI:1895   | 4-Methylbenzyl alcohol                 | C8H10O   | 121.0660887 | No  |
| 400 | HMDB0059873; C14386               | 3-Ethylphenol                          | C8H10O   | 121.0660887 | No  |
| 410 | HMDB0001488; C00253; CHEBI:15940  | Nicotinic acid                         | C6H5NO2  | 122.0250649 | Yes |
| 410 | HMDB0002243; C10164; CHEBI:28747  | Picolinic acid                         | C6H5NO2  | 122.0250649 | Yes |
| 410 | HMDB0031713                       | 2-Hydroxy-4-imino-2,5-cyclohexadienone | C6H5NO2  | 122.0250649 | Yes |
| 410 | HMDB0041950; C06813; CHEBI:27798  | Nitrobenzene                           | C6H5NO2  | 122.0250649 | Yes |
| 410 | HMDB0060665; C07446; CHEBI:6032   | Isonicotinic acid                      | C6H5NO2  | 122.0250649 | Yes |
| 413 | HMDB0029300; C19326; CHEBI:163384 | p-Anisidine                            | C7H9NO   | 122.061245  | Yes |
| 413 | HMDB0032492                       | 2-Propionylpyrrole                     | C7H9NO   | 122.061245  | Yes |
| 413 | HMDB0032578                       | 4-Hydroxybenzylamine                   | C7H9NO   | 122.061245  | Yes |
| 413 | HMDB0036058                       | 1-Ethyl-1H-pyrrole-2-carboxaldehyde    | C7H9NO   | 122.061245  | Yes |
| 413 | HMDB0040360; CHEBI:59982          | 2-Acetyl-1-methylpyrrole               | C7H9NO   | 122.061245  | Yes |
| 418 | HMDB0000873; C06730; CHEBI:17254  | 4-Methylcatechol                       | C7H8O2   | 123.0458593 | No  |
| 418 | HMDB0001398; C01502; CHEBI:28591  | Guaiacol                               | C7H8O2   | 123.0458593 | No  |
| 418 | HMDB0011724; C17467; CHEBI:437856 | 4-Hydroxybenzyl alcohol                | C7H8O2   | 123.0458593 | No  |
| 418 | HMDB0029696                       | Mequinol                               | C7H8O2   | 123.0458593 | No  |
| 418 | HMDB0032917                       | 1-(2-Furanyl)-2-propanone              | C7H8O2   | 123.0458593 | No  |
| 418 | HMDB0034877                       | 2-Acetyl-3-methylfuran                 | C7H8O2   | 123.0458593 | No  |
| 418 | HMDB0035226; CHEBI:562752         | 2-Acetyl-5-methylfuran                 | C7H8O2   | 123.0458593 | No  |
| 418 | HMDB0038963                       | 4,6-Heptadiyne-1,3-diol                | C7H8O2   | 123.0458593 | No  |
| 418 | HMDB0040280                       | 1-(2-Furanyl)-1-propanone              | C7H8O2   | 123.0458593 | No  |
| 418 | HMDB0059709; C02323; CHEBI:16464  | 2-Hydroxybenzyl alcohol                | C7H8O2   | 123.0458593 | No  |
| 418 | HMDB0059712; C03351; CHEBI:17069  | 3-Hydroxybenzyl alcohol                | C7H8O2   | 123.0458593 | No  |

|     |                                   |                                                  |          |             |     |
|-----|-----------------------------------|--------------------------------------------------|----------|-------------|-----|
| 418 | HMDB0135619                       | 3-methoxyphenol                                  | C7H8O2   | 123.0458593 | No  |
| 419 | HMDB0004181; C05827; CHEBI:28104  | Methylimidazole acetaldehyde                     | C6H8N2O  | 123.0565686 | Yes |
| 419 | HMDB0031852                       | 2-Methoxy-3-methylpyrazine                       | C6H8N2O  | 123.0565686 | Yes |
| 419 | HMDB0040141                       | 2-Methoxy-5-methylpyrazine                       | C6H8N2O  | 123.0565686 | Yes |
| 419 | HMDB0040143                       | 2-Methoxy-6-methylpyrazine                       | C6H8N2O  | 123.0565686 | Yes |
| 423 | HMDB0000251; C00245; CHEBI:15891  | Taurine                                          | C2H7NO3S | 124.0075296 | No  |
| 424 | HMDB0011747; C03557; CHEBI:15573  | Ciliatine                                        | C2H8NO3P | 124.0163938 | Yes |
| 429 | HMDB0030345; CHEBI:59533          | 6-Acetyl-1,2,3,4-tetrahydropyridine              | C7H11NO  | 124.0758716 | No  |
| 429 | HMDB0034883                       | 3,4-Dihydro-5-propanoyl-2H-pyrrole               | C7H11NO  | 124.0758716 | No  |
| 429 | HMDB0037853                       | 2-Methyl-4-propyloxazole                         | C7H11NO  | 124.0758716 | No  |
| 429 | HMDB0037854                       | 4-Methyl-2-propyloxazole                         | C7H11NO  | 124.0758716 | No  |
| 429 | HMDB0037860                       | 2-Methyl-5-propyloxazole                         | C7H11NO  | 124.0758716 | No  |
| 429 | HMDB0037861                       | 5-Methyl-2-propyloxazole                         | C7H11NO  | 124.0758716 | No  |
| 429 | HMDB0037865                       | 2-Ethyl-4,5-dimethyloxazole                      | C7H11NO  | 124.0758716 | No  |
| 429 | HMDB0037866                       | 4-Ethyl-2,5-dimethyloxazole                      | C7H11NO  | 124.0758716 | No  |
| 429 | HMDB0037867                       | 5-Ethyl-2,4-dimethyloxazole                      | C7H11NO  | 124.0758716 | No  |
| 429 | HMDB0038288                       | 4-Butyloxazole                                   | C7H11NO  | 124.0758716 | No  |
| 429 | HMDB0038289                       | 5-Butyloxazole                                   | C7H11NO  | 124.0758716 | No  |
| 429 | HMDB0039583                       | 2-Ethyl-5-imino-1-cyclopenten-1-ol               | C7H11NO  | 124.0758716 | No  |
| 431 | HMDB0013780; C08372               | Dimethyl trisulfide                              | C2H6S3   | 124.9545292 | No  |
| 433 | HMDB0003903; C05123; CHEBI:1157   | 2-Hydroxyethanesulfonate                         | C2H6O4S  | 124.9914303 | Yes |
| 433 | HMDB0031233                       | Ethyl hydrogen sulfate                           | C2H6O4S  | 124.9914303 | Yes |
| 434 | HMDB0013674; C01108; CHEBI:16164  | 1,2,3-Trihydroxybenzene                          | C6H6O3   | 125.0244561 | Yes |
| 434 | HMDB0013675; C02183; CHEBI:16204  | 1,3,5-Trihydroxybenzene                          | C6H6O3   | 125.0244561 | Yes |
| 434 | HMDB0029750                       | Methyl 2-furoate                                 | C6H6O3   | 125.0244561 | Yes |
| 434 | HMDB0030776; C11918; CHEBI:142577 | Maltol                                           | C6H6O3   | 125.0244561 | Yes |
| 434 | HMDB0031256                       | 4-Hydroxy-2H-pyran-3-carboxaldehyde              | C6H6O3   | 125.0244561 | Yes |
| 434 | HMDB0032651                       | (Z)-Tamarindienal                                | C6H6O3   | 125.0244561 | Yes |
| 434 | HMDB0034355; C11101; CHEBI:412516 | 5-Hydroxymethyl-2-furancarboxaldehyde            | C6H6O3   | 125.0244561 | Yes |
| 434 | HMDB0059735                       | 5-Methylfuran-2-carboxylic acid                  | C6H6O3   | 125.0244561 | Yes |
| 434 | HMDB0124831                       | benzene-1,2,4-triol                              | C6H6O3   | 125.0244561 | Yes |
| 436 | HMDB0002128; CHEBI:804916         | 2,4-Diamino-6-hydroxypyrimidine                  | C4H6N4O  | 125.0470921 | No  |
| 436 | HMDB0003192; C04051; CHEBI:2030   | 5-Aminoimidazole-4-carboxamide                   | C4H6N4O  | 125.0470921 | No  |
| 437 | HMDB0029582; CHEBI:515741         | Methyl sorbate                                   | C7H10O2  | 125.0600368 | No  |
| 437 | HMDB0031222                       | 3-Ethyl-1,2-cyclopentanedione                    | C7H10O2  | 125.0600368 | No  |
| 437 | HMDB0031223                       | Enol-3-Ethyl-1,2-cyclopentanedione               | C7H10O2  | 125.0600368 | No  |
| 437 | HMDB0032067                       | Allyl crotonate                                  | C7H10O2  | 125.0600368 | No  |
| 437 | HMDB0032333; CHEBI:52939          | 4-Hydroxy-4-methyl-5-hexenoic acid gamma lactone | C7H10O2  | 125.0600368 | No  |
| 437 | HMDB0033629                       | xi-4-Hydroxy-4-methyl-2-cyclohexen-1-one         | C7H10O2  | 125.0600368 | No  |
| 437 | HMDB0034080                       | 3-Methyl-1,2-cyclohexanedione                    | C7H10O2  | 125.0600368 | No  |
| 437 | HMDB0034835                       | 3-(3-Ethylloxiranyl)-2-propenal                  | C7H10O2  | 125.0600368 | No  |
| 437 | HMDB0037026                       | 3,4-Dimethyl-1,2-cyclopentanedione               | C7H10O2  | 125.0600368 | No  |
| 437 | HMDB0037027                       | 3,5-Dimethyl-1,2-cyclopentanedione               | C7H10O2  | 125.0600368 | No  |
| 437 | HMDB0040445                       | 2-(Ethoxymethyl)furan                            | C7H10O2  | 125.0600368 | No  |
| 437 | HMDB0041474                       | xi-5-Isopropyl-2(5H)-furanone                    | C7H10O2  | 125.0600368 | No  |
| 440 | HMDB0013809; CHEBI:61748          | (E)-2-octenal                                    | C8H14O   | 125.0971931 | No  |
| 440 | HMDB0030961                       | 2-Octenal                                        | C8H14O   | 125.0971931 | No  |
| 440 | HMDB0030966                       | (3xi,5Z)-1,5-Octadien-3-ol                       | C8H14O   | 125.0971931 | No  |
| 440 | HMDB0031197                       | 2,4,4-Trimethylcyclopentanone                    | C8H14O   | 125.0971931 | No  |
| 440 | HMDB0031301                       | 2-Octen-4-one                                    | C8H14O   | 125.0971931 | No  |
| 440 | HMDB0031309                       | 1-Octen-3-one                                    | C8H14O   | 125.0971931 | No  |
| 440 | HMDB0031590                       | 3-Methyl-3-hepten-2-one                          | C8H14O   | 125.0971931 | No  |
| 440 | HMDB0031591                       | 5-Methyl-5-hepten-2-one                          | C8H14O   | 125.0971931 | No  |
| 440 | HMDB0032403                       | 6-Methyl-3-hepten-2-one, trans-                  | C8H14O   | 125.0971931 | No  |
| 440 | HMDB0032451                       | 4-Octen-3-one                                    | C8H14O   | 125.0971931 | No  |
| 440 | HMDB0033547                       | 3-Octen-2-one                                    | C8H14O   | 125.0971931 | No  |
| 440 | HMDB0035242                       | (S,E)-Filbertone                                 | C8H14O   | 125.0971931 | No  |
| 440 | HMDB0035390                       | 5-Octen-2-one                                    | C8H14O   | 125.0971931 | No  |
| 440 | HMDB0035915; C07287; CHEBI:16310  | Sulcatone                                        | C8H14O   | 125.0971931 | No  |
| 440 | HMDB0037152                       | 2-Ethylidenehexanal                              | C8H14O   | 125.0971931 | No  |
| 440 | HMDB0039769                       | 6-Octenal                                        | C8H14O   | 125.0971931 | No  |

|     |                                  |                                                |          |             |     |
|-----|----------------------------------|------------------------------------------------|----------|-------------|-----|
| 440 | HMDB0039770                      | (Z)-5-Octenal                                  | C8H14O   | 125.0971931 | No  |
| 440 | HMDB0040146                      | 2,5-Octadien-1-ol                              | C8H14O   | 125.0971931 | No  |
| 440 | HMDB0040149                      | (3E,5Z)-3,5-Octadien-1-ol                      | C8H14O   | 125.0971931 | No  |
| 440 | HMDB0040151                      | (2E,4E)-2,4-Octadien-1-ol                      | C8H14O   | 125.0971931 | No  |
| 440 | HMDB0061945; CHEBI:88838         | 2-Ethyl-2-hexenal                              | C8H14O   | 125.0971931 | No  |
| 440 | HMDB0062471                      | glutathionyl-3-hydroxykynurenine glucoside     | C8H14O   | 125.0971931 | No  |
| 440 | HMDB0062529                      | Sialyl-3-paragloboside                         | C8H14O   | 125.0971931 | No  |
| 440 | HMDB0062536                      | trans-3-cis-8,11,14-eicosatetraenoyl-CoA       | C8H14O   | 125.0971931 | No  |
| 443 | HMDB0034368                      | Hydroxyminaline                                | C5H5NO3  | 126.0198204 | Yes |
| 444 | HMDB0060659; C16621              | 1-Methyl-4-nitroimidazole                      | C4H5N3O2 | 126.0308194 | Yes |
| 445 | HMDB0001084; C04092; CHEBI:30912 | D-1-Piperidine-2-carboxylic acid               | C6H9NO2  | 126.0560214 | No  |
| 445 | HMDB0012130; CHEBI:49015         | (S)-2,3,4,5-Tetrahydropiperidine-2-carboxylate | C6H9NO2  | 126.0560214 | No  |
| 445 | HMDB0029434                      | (±)-4-Methylene-2-pyrrolidinecarboxylic acid   | C6H9NO2  | 126.0560214 | No  |
| 445 | HMDB0059657; C00450; CHEBI:49014 | (S)-2,3,4,5-tetrahydropyridine-2-carboxylate   | C6H9NO2  | 126.0560214 | No  |
| 447 | HMDB0031667                      | Nor-psi-tropine                                | C7H13NO  | 126.092474  | No  |
| 447 | HMDB0040030                      | 1-(1-Pyrrolidinyl)-2-propanone                 | C7H13NO  | 126.092474  | No  |
| 454 | HMDB0059784; CHEBI:86395         | 5-Hydroxy-2-furoic acid                        | C5H4O4   | 127.0040153 | No  |
| 455 | HMDB0041833; C00813; CHEBI:16294 | Barbituric acid                                | C4H4N2O3 | 127.0146309 | No  |
| 456 | HMDB0032916                      | 2-(Methylthiomethyl)furan                      | C6H8OS   | 127.0228171 | No  |
| 456 | HMDB0036610                      | 2-Methyl-3-(methylthio)furan                   | C6H8OS   | 127.0228171 | No  |
| 456 | HMDB0039586                      | 2-(1-Mercaptoethyl)furan                       | C6H8OS   | 127.0228171 | No  |
| 456 | HMDB0039800                      | 5-Methyl-2-furanmethanethiol                   | C6H8OS   | 127.0228171 | No  |
| 456 | HMDB0040197                      | 2,5-Dimethyl-3-furanthiol                      | C6H8OS   | 127.0228171 | No  |
| 456 | HMDB0041566                      | 2-Methyl-5-(methylthio)furan                   | C6H8OS   | 127.0228171 | No  |
| 458 | HMDB0031303                      | Osmundalactone                                 | C6H8O3   | 127.0401707 | Yes |
| 458 | HMDB0031306                      | 3-Hydroxy-4,5-dimethyl-2(5H)-furanone          | C6H8O3   | 127.0401707 | Yes |
| 458 | HMDB0031847                      | 2-Ethyl-3,4-dihydroxyfuran                     | C6H8O3   | 127.0401707 | Yes |
| 458 | HMDB0033285                      | L-erythro-5-(1-Hydroxyethyl)-2(5H)-furanone    | C6H8O3   | 127.0401707 | Yes |
| 458 | HMDB0033517                      | 5,6-Dihydro-4-methoxy-2H-pyran-2-one           | C6H8O3   | 127.0401707 | Yes |
| 458 | HMDB0038072                      | xi-5-Acetyltetrahydro-2(3H)-furanone           | C6H8O3   | 127.0401707 | Yes |
| 458 | HMDB0040594; CHEBI:76247         | (±)-Furaneol                                   | C6H8O3   | 127.0401707 | Yes |
| 458 | HMDB0040732                      | 2,7-Oxepanedione                               | C6H8O3   | 127.0401707 | Yes |
| 459 | HMDB0000079; C00906; CHEBI:27468 | Dihydrothymine                                 | C5H8N2O2 | 127.0512895 | Yes |
| 459 | HMDB0029874; CHEBI:565546        | Squamolone                                     | C5H8N2O2 | 127.0512895 | Yes |
| 459 | HMDB0031547                      | L-Cyclo(alanylglycyl)                          | C5H8N2O2 | 127.0512895 | Yes |
| 459 | HMDB0062558; CHEBI:133469        | Pyroglutamine                                  | C5H8N2O2 | 127.0512895 | Yes |
| 460 | HMDB0029165                      | 1,3-Diacetylpropane                            | C7H12O2  | 127.0764893 | Yes |
| 460 | HMDB0029314                      | Isopentenyl acetate                            | C7H12O2  | 127.0764893 | Yes |
| 460 | HMDB0030330                      | 1-Methoxy-3-methylene-2-pentanone              | C7H12O2  | 127.0764893 | Yes |
| 460 | HMDB0031174                      | 4-Methyl-5-hexanolide                          | C7H12O2  | 127.0764893 | Yes |
| 460 | HMDB0031342; C09822; CHEBI:36096 | Cyclohexanecarboxylic acid                     | C7H12O2  | 127.0764893 | Yes |
| 460 | HMDB0031351                      | Cyclohexyl formate                             | C7H12O2  | 127.0764893 | Yes |
| 460 | HMDB0031476                      | 2,3-Heptanedione                               | C7H12O2  | 127.0764893 | Yes |
| 460 | HMDB0031477                      | 3,4-Heptanedione                               | C7H12O2  | 127.0764893 | Yes |
| 460 | HMDB0031484; CHEBI:38364         | 2-Heptenoic acid                               | C7H12O2  | 127.0764893 | Yes |
| 460 | HMDB0031500                      | Methyl 2E-hexenoate                            | C7H12O2  | 127.0764893 | Yes |
| 460 | HMDB0031504                      | Methyl (Z)-3-hexenoate                         | C7H12O2  | 127.0764893 | Yes |
| 460 | HMDB0031593                      | 5-Methyl-2,3-hexanedione                       | C7H12O2  | 127.0764893 | Yes |
| 460 | HMDB0031603                      | Ethyl 4-pentenoate                             | C7H12O2  | 127.0764893 | Yes |
| 460 | HMDB0031681                      | Dihydro-5-propyl-2(3H)-furanone                | C7H12O2  | 127.0764893 | Yes |
| 460 | HMDB0032391                      | 3-Methyl-3-butenyl acetate                     | C7H12O2  | 127.0764893 | Yes |
| 460 | HMDB0032460; CHEBI:87515         | 4-Pentenyl acetate                             | C7H12O2  | 127.0764893 | Yes |
| 460 | HMDB0033793                      | 4-Heptenoic acid                               | C7H12O2  | 127.0764893 | Yes |
| 460 | HMDB0038271                      | 2-Hexenyl formate                              | C7H12O2  | 127.0764893 | Yes |
| 460 | HMDB0038962; C08487              | Ethyl tiglate                                  | C7H12O2  | 127.0764893 | Yes |
| 460 | HMDB0039819                      | 2,4-Dimethyl-2-pentenoic acid                  | C7H12O2  | 127.0764893 | Yes |
| 460 | HMDB0040214                      | cis-3-Hexenyl formate                          | C7H12O2  | 127.0764893 | Yes |
| 460 | HMDB0040591                      | Allyl butyrate                                 | C7H12O2  | 127.0764893 | Yes |
| 467 | HMDB0033561                      | 2-Acetyl-4,5-dihydrothiazole                   | C5H7NOS  | 128.0176917 | No  |
| 467 | HMDB0037178                      | 5-Methoxy-2-methylthiazole                     | C5H7NOS  | 128.0176917 | No  |
| 467 | HMDB0041282                      | 2-Ethoxythiazole                               | C5H7NOS  | 128.0176917 | No  |

|     |                                   |                                                      |           |             |     |
|-----|-----------------------------------|------------------------------------------------------|-----------|-------------|-----|
| 470 | HMDB0000267; C01879; CHEBI:18183  | Pyroglutamic acid                                    | C5H7NO3   | 128.0354268 | Yes |
| 470 | HMDB0000805; C02237; CHEBI:16010  | Pyrrolidonecarboxylic acid                           | C5H7NO3   | 128.0354268 | Yes |
| 470 | HMDB0001369; C04281; CHEBI:27391  | Pyrroline hydroxycarboxylic acid                     | C5H7NO3   | 128.0354268 | Yes |
| 470 | HMDB0001843                       | N-Acryloylglycine                                    | C5H7NO3   | 128.0354268 | Yes |
| 470 | HMDB0002234; C04282; CHEBI:16352  | 1-Pyrroline-4-hydroxy-2-carboxylate                  | C5H7NO3   | 128.0354268 | Yes |
| 470 | HMDB0060262                       | 5-Oxoprolinate                                       | C5H7NO3   | 128.0354268 | Yes |
| 470 | HMDB0061093                       | dimethadione                                         | C5H7NO3   | 128.0354268 | Yes |
| 470 | HMDB0062585; C04281; CHEBI:6151   | (3R,5S)-1-pyrroline-3-hydroxy-5-carboxylic Acid      | C5H7NO3   | 128.0354268 | Yes |
| 471 | HMDB0032341                       | Isoamyl isothiocyanate                               | C6H11NS   | 128.05439   | Yes |
| 471 | HMDB0038433                       | 1-Isothiocyanatopentane                              | C6H11NS   | 128.05439   | Yes |
| 471 | HMDB0038973                       | 2,5-Dihydro-2,4,5-trimethylthiazole                  | C6H11NS   | 128.05439   | Yes |
| 473 | HMDB0000070; C00408; CHEBI:17964  | Pipecolic acid                                       | C6H11NO2  | 128.0717386 | Yes |
| 473 | HMDB0000716; C00408; CHEBI:30913  | L-Pipecolic acid                                     | C6H11NO2  | 128.0717386 | Yes |
| 473 | HMDB0004226; C05936; CHEBI:7386   | N4-Acetylaminobutanal                                | C6H11NO2  | 128.0717386 | Yes |
| 473 | HMDB0005960; CHEBI:41582          | D-Pipecolic acid                                     | C6H11NO2  | 128.0717386 | Yes |
| 473 | HMDB0015212; C07500; CHEBI:63638  | Vigabatrin                                           | C6H11NO2  | 128.0717386 | Yes |
| 473 | HMDB0029435                       | L-trans-4-Methyl-2-pyrrolidinecarboxylic acid        | C6H11NO2  | 128.0717386 | Yes |
| 473 | HMDB0029444                       | 2-Pyrrolidineacetic acid                             | C6H11NO2  | 128.0717386 | Yes |
| 473 | HMDB0059649                       | 3-Acetamidobutanal                                   | C6H11NO2  | 128.0717386 | Yes |
| 473 | HMDB0062225; C03969; CHEBI:40547  | (2E)-Decenoyl-ACP                                    | C6H11NO2  | 128.0717386 | Yes |
| 473 | HMDB0094696; CHEBI:90344          | N-Methyl proline                                     | C6H11NO2  | 128.0717386 | Yes |
| 473 | HMDB0094697                       | 1-Piperidine carboxylic acid                         | C6H11NO2  | 128.0717386 | Yes |
| 476 | HMDB0001921; C07151; CHEBI:6801   | 1,1-Dimethylbiguanide                                | C4H11N5   | 128.0943377 | No  |
| 484 | HMDB0031853                       | 2-Thiophenemethanethiol                              | C5H6S2    | 128.9846514 | No  |
| 484 | HMDB0032939                       | 3-(Methylthio)thiophene                              | C5H6S2    | 128.9846514 | No  |
| 484 | HMDB0039787                       | 2-Methyl-3-thiophenethiol                            | C5H6S2    | 128.9846514 | No  |
| 484 | HMDB0039788                       | 5-Methyl-3-thiophenethiol                            | C5H6S2    | 128.9846514 | No  |
| 486 | HMDB0033548                       | 4-Hydroxy-5-methyl-3(2H)-thiophenone                 | C5H6O2S   | 129.0015062 | No  |
| 487 | HMDB0000620; C02214; CHEBI:15670  | Glutaconic acid                                      | C5H6O4    | 129.0194392 | Yes |
| 487 | HMDB0000634; C02226; CHEBI:17626  | Citraconic acid                                      | C5H6O4    | 129.0194392 | Yes |
| 487 | HMDB0000749; C01732; CHEBI:16600  | Mesaconic acid                                       | C5H6O4    | 129.0194392 | Yes |
| 487 | HMDB0002092; C00490; CHEBI:30838  | Itaconic acid                                        | C5H6O4    | 129.0194392 | Yes |
| 487 | HMDB0013233; C02800; CHEBI:17204  | Gamma-delta-Dioxovaleric acid                        | C5H6O4    | 129.0194392 | Yes |
| 487 | HMDB0033809                       | Methyl hydrogen fumarate                             | C5H6O4    | 129.0194392 | Yes |
| 487 | HMDB0059743; CHEBI:74524          | 2-Hydroxyglutaric acid lactone                       | C5H6O4    | 129.0194392 | Yes |
| 487 | HMDB0060365; CHEBI:17415          | 2,5-Dioxopentanoate                                  | C5H6O4    | 129.0194392 | Yes |
| 487 | HMDB0061185                       | 2-Pentendioate                                       | C5H6O4    | 129.0194392 | Yes |
| 489 | HMDB0031370                       | 2-[(Methylthio)methyl]-2-butanal                     | C6H10OS   | 129.0389316 | No  |
| 489 | HMDB0037493                       | S-2-Propenyl propanethioate                          | C6H10OS   | 129.0389316 | No  |
| 489 | HMDB0040238                       | 2-Ethylidihydro-3(2H)-thiophenone                    | C6H10OS   | 129.0389316 | No  |
| 490 | HMDB0000408; CHEBI:86365          | 2-Methyl-3-ketovaleric acid                          | C6H10O3   | 129.0557235 | Yes |
| 490 | HMDB0000491; C03465; CHEBI:35932  | 3-Methyl-2-oxovaleric acid                           | C6H10O3   | 129.0557235 | Yes |
| 490 | HMDB0000695; C00233; CHEBI:48430  | Ketoleucine                                          | C6H10O3   | 129.0557235 | Yes |
| 490 | HMDB0001864; C00902; CHEBI:17308  | 2-Ketohexanoic acid                                  | C6H10O3   | 129.0557235 | Yes |
| 490 | HMDB0006024                       | Mevalonolactone                                      | C6H10O3   | 129.0557235 | Yes |
| 490 | HMDB0010717; C02122; CHEBI:28422  | 3-Oxohexanoic acid                                   | C6H10O3   | 129.0557235 | Yes |
| 490 | HMDB0012882; C06102; CHEBI:2490   | Adipate semialdehyde                                 | C6H10O3   | 129.0557235 | Yes |
| 490 | HMDB0031214; CHEBI:87307          | 5-Ethoxy-4,5-dihydro-2(3H)furanone                   | C6H10O3   | 129.0557235 | Yes |
| 490 | HMDB0031216                       | Ethyl acetoacetate                                   | C6H10O3   | 129.0557235 | Yes |
| 490 | HMDB0031218; C03500; CHEBI:386429 | Ethyl 3-oxobutanoate                                 | C6H10O3   | 129.0557235 | Yes |
| 490 | HMDB0033286                       | Sherry lactone                                       | C6H10O3   | 129.0557235 | Yes |
| 490 | HMDB0033302                       | (4S,6S)-3,4,5,6-Tetrahydro-4-hydroxy-6-methyl-2H-pyr | C6H10O3   | 129.0557235 | Yes |
| 490 | HMDB0033698                       | Acetoin acetate                                      | C6H10O3   | 129.0557235 | Yes |
| 490 | HMDB0041602                       | Methyl levulinate                                    | C6H10O3   | 129.0557235 | Yes |
| 490 | HMDB0059876                       | Pantolactone                                         | C6H10O3   | 129.0557235 | Yes |
| 490 | HMDB0061881; C02129; CHEBI:15888  | 4-Acetylbutyrate                                     | C6H10O3   | 129.0557235 | Yes |
| 491 | HMDB0029396                       | L-cis-3-Amino-2-pyrrolidinecarboxylic acid           | C5H10N2O2 | 129.0670823 | No  |
| 491 | HMDB0030405                       | D-1-Amino-2-pyrrolidinecarboxylic acid               | C5H10N2O2 | 129.0670823 | No  |
| 492 | HMDB0031537                       | 3-Methylcyclohexanethiol                             | C7H14S    | 129.0745765 | No  |
| 493 | HMDB0000666; C17714; CHEBI:45571  | Heptanoic acid                                       | C7H14O2   | 129.0920709 | No  |
| 493 | HMDB0030028; C12290               | Ethyl isovalerate                                    | C7H14O2   | 129.0920709 | No  |

|     |                                  |                                                   |          |             |     |
|-----|----------------------------------|---------------------------------------------------|----------|-------------|-----|
| 493 | HMDB0030052                      | Butyl propionate                                  | C7H14O2  | 129.0920709 | No  |
| 493 | HMDB0031528; C12296; CHEBI:31725 | Isopentyl acetate                                 | C7H14O2  | 129.0920709 | No  |
| 493 | HMDB0031594                      | 2-Methylhexanoic acid                             | C7H14O2  | 129.0920709 | No  |
| 493 | HMDB0031595                      | 5-Methylhexanoic acid                             | C7H14O2  | 129.0920709 | No  |
| 493 | HMDB0031600                      | (±)-2-Pentanol acetate                            | C7H14O2  | 129.0920709 | No  |
| 493 | HMDB0032204                      | cis- and trans-2-Isopropyl-4-methyl-1,3-dioxolane | C7H14O2  | 129.0920709 | No  |
| 493 | HMDB0032874                      | Hexyl formate                                     | C7H14O2  | 129.0920709 | No  |
| 493 | HMDB0033745                      | Ethyl 2-methylbutyrate                            | C7H14O2  | 129.0920709 | No  |
| 493 | HMDB0034166; CHEBI:50585         | 2-Methylbutyl acetate                             | C7H14O2  | 129.0920709 | No  |
| 493 | HMDB0034239                      | 2-Methylpropyl propanoate                         | C7H14O2  | 129.0920709 | No  |
| 493 | HMDB0035238; CHEBI:77322         | Methyl hexanoate                                  | C7H14O2  | 129.0920709 | No  |
| 493 | HMDB0036209                      | Propyl 2-methylpropanoate                         | C7H14O2  | 129.0920709 | No  |
| 493 | HMDB0036237                      | Methyl (±)-2-methylpentanoate                     | C7H14O2  | 129.0920709 | No  |
| 493 | HMDB0036238                      | Methyl 4-methylpentanoate                         | C7H14O2  | 129.0920709 | No  |
| 493 | HMDB0038227                      | Isopropyl 2-methylpropanoate                      | C7H14O2  | 129.0920709 | No  |
| 493 | HMDB0039095                      | Pentyl acetate                                    | C7H14O2  | 129.0920709 | No  |
| 493 | HMDB0039618                      | Propyl butyrate                                   | C7H14O2  | 129.0920709 | No  |
| 493 | HMDB0039619                      | Isopropyl butyrate                                | C7H14O2  | 129.0920709 | No  |
| 493 | HMDB0040297                      | Ethyl pentanoate                                  | C7H14O2  | 129.0920709 | No  |
| 494 | HMDB0002064; C02714; CHEBI:17768 | N-Acetylputrescine                                | C6H14N2O | 129.1032891 | No  |
| 494 | HMDB0060268                      | N-Acetylputrescinium                              | C6H14N2O | 129.1032891 | No  |
| 503 | HMDB0000725; C01157; CHEBI:18095 | 4-Hydroxyproline                                  | C5H9NO3  | 130.0510919 | Yes |
| 503 | HMDB0000766; CHEBI:40992         | N-Acetyl-L-alanine                                | C5H9NO3  | 130.0510919 | Yes |
| 503 | HMDB0000783; CHEBI:89836         | Propionylglycine                                  | C5H9NO3  | 130.0510919 | Yes |
| 503 | HMDB0001149; C00430; CHEBI:17549 | 5-Aminolevulinic acid                             | C5H9NO3  | 130.0510919 | Yes |
| 503 | HMDB0002104; C01165; CHEBI:17232 | L-Glutamic gamma-semialdehyde                     | C5H9NO3  | 130.0510919 | Yes |
| 503 | HMDB0002113; C04397; CHEBI:87840 | 3-Hydroxy-L-proline                               | C5H9NO3  | 130.0510919 | Yes |
| 503 | HMDB0006055; C01015; CHEBI:18240 | 4-Hydroxy-L-proline                               | C5H9NO3  | 130.0510919 | Yes |
| 503 | HMDB0006272; C01110; CHEBI:49268 | 5-Amino-2-oxopentanoic acid                       | C5H9NO3  | 130.0510919 | Yes |
| 503 | HMDB0036576; CHEBI:20392         | 4-Hydroxy-2-pyrrolidinecarboxylic acid            | C5H9NO3  | 130.0510919 | Yes |
| 503 | HMDB0059659; C05147; CHEBI:16889 | Trans-3-hydroxy-L-proline                         | C5H9NO3  | 130.0510919 | Yes |
| 503 | HMDB0060460; C03440; CHEBI:16231 | cis-4-Hydroxy-D-proline                           | C5H9NO3  | 130.0510919 | Yes |
| 503 | HMDB0061880; C01073; CHEBI:16682 | N-Acetyl-beta-alanine                             | C5H9NO3  | 130.0510919 | Yes |
| 503 | HMDB0240251; CHEBI:28397         | cis-4-Hydroxyproline                              | C5H9NO3  | 130.0510919 | Yes |
| 504 | HMDB0000064; C00300; CHEBI:16919 | Creatine                                          | C4H9N3O2 | 130.062635  | Yes |
| 504 | HMDB0013222; C03065; CHEBI:15968 | Beta-Guanidinopropionic acid                      | C4H9N3O2 | 130.062635  | Yes |
| 505 | HMDB0040058                      | (±)-2-Propylthiazolidine                          | C6H13NS  | 130.069356  | Yes |
| 506 | HMDB0000172; C00407; CHEBI:17191 | L-Isoleucine                                      | C6H13NO2 | 130.0872156 | Yes |
| 506 | HMDB0000557; CHEBI:43433         | L-Alloisoleucine                                  | C6H13NO2 | 130.0872156 | Yes |
| 506 | HMDB0000687; C00123; CHEBI:15603 | L-Leucine                                         | C6H13NO2 | 130.0872156 | Yes |
| 506 | HMDB0001645; C01933; CHEBI:18347 | L-Norleucine                                      | C6H13NO2 | 130.0872156 | Yes |
| 506 | HMDB0001901; C02378; CHEBI:16586 | Aminocaproic acid                                 | C6H13NO2 | 130.0872156 | Yes |
| 506 | HMDB0003640; C02486; CHEBI:15604 | Beta-Leucine                                      | C6H13NO2 | 130.0872156 | Yes |
| 506 | HMDB0013773; C01570; CHEBI:28225 | D-Leucine                                         | C6H13NO2 | 130.0872156 | Yes |
| 506 | HMDB0029168                      | 3-Aminocaproic acid                               | C6H13NO2 | 130.0872156 | Yes |
| 506 | HMDB0033923; C16434; CHEBI:38264 | (±)-erythro-Isoleucine                            | C6H13NO2 | 130.0872156 | Yes |
| 506 | HMDB0036382                      | 6-Deoxyfagomine                                   | C6H13NO2 | 130.0872156 | Yes |
| 506 | HMDB0060650; CHEBI:67144         | N-(2-Hydroxyethyl)-morpholine                     | C6H13NO2 | 130.0872156 | Yes |
| 506 | HMDB0061716; CHEBI:44212         | N-methylvaline                                    | C6H13NO2 | 130.0872156 | Yes |
| 506 | HMDB0062203; C16439; CHEBI:25017 | 3,3,5-triiodo-L-thyronine-beta-D-glucuronoside    | C6H13NO2 | 130.0872156 | Yes |
| 517 | HMDB0000223; C00036; CHEBI:30744 | Oxalacetic acid                                   | C4H4O5   | 130.9987305 | No  |
| 517 | HMDB0039791                      | 2,3-Dihydro-5-methyl-3-thiophenethiol             | C5H8S2   | 130.9987305 | No  |
| 517 | HMDB0039792                      | 4,5-Dihydro-2-methyl-3-thiophenethiol             | C5H8S2   | 130.9987305 | No  |
| 517 | HMDB0039796                      | 4,5-Dihydro-5-methyl-3-thiophenethiol             | C5H8S2   | 130.9987305 | No  |
| 521 | HMDB0000576                      | Monoethyl malonic acid                            | C5H8O4   | 131.0353042 | Yes |
| 521 | HMDB0000622; CHEBI:741548        | Ethylmalonic acid                                 | C5H8O4   | 131.0353042 | Yes |
| 521 | HMDB0000661; C00489; CHEBI:17859 | Glutaric acid                                     | C5H8O4   | 131.0353042 | Yes |
| 521 | HMDB0001844; C08645; CHEBI:29003 | Methylsuccinic acid                               | C5H8O4   | 131.0353042 | Yes |
| 521 | HMDB0002001; CHEBI:111517        | Dimethylmalonic acid                              | C5H8O4   | 131.0353042 | Yes |
| 521 | HMDB0006833; C00900; CHEBI:16444 | 2-Acetolactate                                    | C5H8O4   | 131.0353042 | Yes |
| 521 | HMDB0006855; C06010; CHEBI:18409 | (S)-2-Acetolactate                                | C5H8O4   | 131.0353042 | Yes |

|     |                                   |                                        |           |             |     |
|-----|-----------------------------------|----------------------------------------|-----------|-------------|-----|
| 521 | HMDB0029884                       | 2-C-Methyl-1,4-erythrono-D-lactone     | C5H8O4    | 131.0353042 | Yes |
| 521 | HMDB0033958                       | 2-Deoxy-L-ribono-1,4-lactone           | C5H8O4    | 131.0353042 | Yes |
| 521 | HMDB0040531                       | 2-Hydroxy-4-oxopentanoic acid          | C5H8O4    | 131.0353042 | Yes |
| 521 | HMDB0061879; CHEBI:75146          | (5S)-Methylbutanethioic acid           | C5H8O4    | 131.0353042 | Yes |
| 522 | HMDB0000026; C02642; CHEBI:18261  | Ureidopropionic acid                   | C4H8N2O3  | 131.0462522 | Yes |
| 522 | HMDB0000168; C00152; CHEBI:17196  | L-Asparagine                           | C4H8N2O3  | 131.0462522 | Yes |
| 522 | HMDB0011733; C02037; CHEBI:17201  | Glycyl-glycine                         | C4H8N2O3  | 131.0462522 | Yes |
| 522 | HMDB0012265; C01043; CHEBI:15737  | N-Carbamoylsarcosine                   | C4H8N2O3  | 131.0462522 | Yes |
| 522 | HMDB0033780; C01905; CHEBI:28159  | D-Asparagine                           | C4H8N2O3  | 131.0462522 | Yes |
| 523 | HMDB0031519; CHEBI:77856          | 4-Mercapto-4-methyl-2-pentanone        | C6H12O5   | 131.0534828 | No  |
| 523 | HMDB0032237                       | 2,5-Dimethyl-3-mercaptotetrahydrofuran | C6H12O5   | 131.0534828 | No  |
| 523 | HMDB0032430                       | 4-(Methylthio)-2-pentanone             | C6H12O5   | 131.0534828 | No  |
| 523 | HMDB0035176                       | 3-Mercapto-2-methylpentanal            | C6H12O5   | 131.0534828 | No  |
| 523 | HMDB0039843                       | S-Methyl 3-methylthiobutyrate          | C6H12O5   | 131.0534828 | No  |
| 524 | HMDB0033171                       | 1-Methylpyrrolo[1,2-a]pyrazine         | C8H8N2    | 131.0615965 | No  |
| 524 | HMDB0033173                       | 4-Methylpyrrolo[1,2-a]pyrazine         | C8H8N2    | 131.0615965 | No  |
| 525 | HMDB0000317                       | 2-Hydroxy-3-methylpentanoic acid       | C6H12O3   | 131.0715086 | Yes |
| 525 | HMDB0000409; CHEBI:78842          | (5R)-5-Hydroxyhexanoic acid            | C6H12O3   | 131.0715086 | Yes |
| 525 | HMDB0000525; CHEBI:131434         | 5-Hydroxyhexanoic acid                 | C6H12O3   | 131.0715086 | Yes |
| 525 | HMDB0000624; C03264; CHEBI:55534  | D-Leucic acid                          | C6H12O3   | 131.0715086 | Yes |
| 525 | HMDB0000665; CHEBI:59783          | Leucinic acid                          | C6H12O3   | 131.0715086 | Yes |
| 525 | HMDB0000746; CHEBI:44510          | Hydroxyisocaproic acid                 | C6H12O3   | 131.0715086 | Yes |
| 525 | HMDB0001624; CHEBI:86542          | 2-Hydroxycaproic acid                  | C6H12O3   | 131.0715086 | Yes |
| 525 | HMDB0001975                       | 2-Ethyl-2-Hydroxybutyric acid          | C6H12O3   | 131.0715086 | Yes |
| 525 | HMDB0010718                       | (R)-3-Hydroxyhexanoic acid             | C6H12O3   | 131.0715086 | Yes |
| 525 | HMDB0012843; C06103; CHEBI:17869  | 6-Hydroxyhexanoic acid                 | C6H12O3   | 131.0715086 | Yes |
| 525 | HMDB0029166                       | 2-Methyl-3-hydroxyvaleric acid         | C6H12O3   | 131.0715086 | Yes |
| 525 | HMDB0032158                       | (+/-)-1-Acetoxy-1-ethoxyethane         | C6H12O3   | 131.0715086 | Yes |
| 525 | HMDB0032456; C07834; CHEBI:27909  | Paraldehyde                            | C6H12O3   | 131.0715086 | Yes |
| 525 | HMDB0033851                       | 4,4-Dimethoxy-2-butanone               | C6H12O3   | 131.0715086 | Yes |
| 525 | HMDB0040409; CHEBI:87685          | Ethyl (±)-3-hydroxybutyrate            | C6H12O3   | 131.0715086 | Yes |
| 525 | HMDB0041844                       | Butoxyacetic acid                      | C6H12O3   | 131.0715086 | Yes |
| 525 | HMDB0059770                       | Threo-3-Hydroxy-2-methylbutyric acid   | C6H12O3   | 131.0715086 | Yes |
| 525 | HMDB0061652; CHEBI:37035          | 3-hydroxyhexanoic acid                 | C6H12O3   | 131.0715086 | Yes |
| 526 | HMDB0000214; C00077; CHEBI:15729  | Ornithine                              | C5H12N2O2 | 131.0827168 | Yes |
| 526 | HMDB0003374; C00515; CHEBI:16176  | D-Ornithine                            | C5H12N2O2 | 131.0827168 | Yes |
| 531 | HMDB0038442                       | 1-Isothiocyanato-2-(methylthio)ethane  | C4H7NS2   | 131.9949988 | No  |
| 534 | HMDB0000191; C00049; CHEBI:17053  | L-Aspartic acid                        | C4H7NO4   | 132.0302478 | Yes |
| 534 | HMDB0006483; C00402; CHEBI:17364  | D-Aspartic acid                        | C4H7NO4   | 132.0302478 | Yes |
| 534 | HMDB0011753; C19911; CHEBI:24786  | Iminodiacetic acid                     | C4H7NO4   | 132.0302478 | Yes |
| 534 | HMDB00062186; C16433; CHEBI:22660 | 1-deoxy-1-(N6-lysino)-D-fructose       | C4H7NO4   | 132.0302478 | Yes |
| 535 | HMDB0004094; C05658; CHEBI:17840  | Indoxyl                                | C8H7NO    | 132.0455529 | Yes |
| 535 | HMDB0029757; C03766; CHEBI:16667  | 4-Hydroxybenzeneacetone nitrile        | C8H7NO    | 132.0455529 | Yes |
| 535 | HMDB0032390; CHEBI:51603          | 2-Methyl-4,5-benzoxazole               | C8H7NO    | 132.0455529 | Yes |
| 535 | HMDB0034666; CHEBI:16910          | (±)-2-Hydroxy-2-phenylacetone nitrile  | C8H7NO    | 132.0455529 | Yes |
| 535 | HMDB0059805; CHEBI:89649          | 5-Hydroxyindole                        | C8H7NO    | 132.0455529 | Yes |
| 535 | HMDB0060486; C00561; CHEBI:18450  | Mandelonitrile                         | C8H7NO    | 132.0455529 | Yes |
| 535 | HMDB0061918; C12312; CHEBI:31697  | 1,3-Dihydro-(2H)-indol-2-one           | C8H7NO    | 132.0455529 | Yes |
| 536 | HMDB0031658                       | L-2-Amino-5-hydroxypentanoic acid      | C5H11NO3  | 132.0666827 | No  |
| 536 | HMDB0032356                       | N-Lactoyl ethanolamine                 | C5H11NO3  | 132.0666827 | No  |
| 536 | HMDB0039499                       | 1,4-Dideoxy-1,4-imino-D-ribitol        | C5H11NO3  | 132.0666827 | No  |
| 538 | HMDB0012489; CHEBI:114116         | 1,2,3,4-Tetrahydroisoquinoline         | C9H11N    | 132.0820604 | No  |
| 538 | HMDB0014890; C07155               | Tranylcypromine                        | C9H11N    | 132.0820604 | No  |
| 548 | HMDB00000156; C00149; CHEBI:30797 | L-Malic acid                           | C4H6O5    | 133.0144021 | Yes |
| 548 | HMDB0000744; C00711; CHEBI:6650   | Malic acid                             | C4H6O5    | 133.0144021 | Yes |
| 548 | HMDB0031518; C00497; CHEBI:30796  | D-Malic acid                           | C4H6O5    | 133.0144021 | Yes |
| 548 | HMDB0032872                       | Velcorin                               | C4H6O5    | 133.0144021 | Yes |
| 548 | HMDB0038974                       | 3,3-Dimethyl-1,2-dithiolane            | C5H10S2   | 133.0144021 | Yes |
| 548 | HMDB0039789                       | Tetrahydro-2-methyl-2-thiophenethiol   | C5H10S2   | 133.0144021 | Yes |
| 548 | HMDB0039790                       | Tetrahydro-2-methyl-3-thiophenethiol   | C5H10S2   | 133.0144021 | Yes |
| 549 | HMDB0032469; C09921; CHEBI:479525 | Phthalide                              | C8H6O2    | 133.0296238 | Yes |

|     |                                   |                                                    |         |             |     |
|-----|-----------------------------------|----------------------------------------------------|---------|-------------|-----|
| 549 | HMDB0061916                       | Phenylglyoxal                                      | C8H6O2  | 133.0296238 | Yes |
| 549 | HMDB0129378                       | 1-benzofuran-4-ol                                  | C8H6O2  | 133.0296238 | Yes |
| 551 | HMDB0000421                       | 2,3-Dihydroxyvaleric acid                          | C5H10O4 | 133.0505423 | Yes |
| 551 | HMDB0001292; C06257               | 1-Deoxy-D-xylulose                                 | C5H10O4 | 133.0505423 | Yes |
| 551 | HMDB0003224; C01801; CHEBI:28816  | Deoxyribose                                        | C5H10O4 | 133.0505423 | Yes |
| 551 | HMDB0012141; C04272; CHEBI:15684  | (R)-2,3-Dihydroxy-isovalerate                      | C5H10O4 | 133.0505423 | Yes |
| 551 | HMDB0012485                       | (R)-glycerol 1-acetate                             | C5H10O4 | 133.0505423 | Yes |
| 551 | HMDB0029576                       | 2,3-Dihydroxy-2-methylbutanoic acid                | C5H10O4 | 133.0505423 | Yes |
| 551 | HMDB0127615                       | 3-hydroxy-2-(hydroxymethyl)-2-methylpropanoic acid | C5H10O4 | 133.0505423 | Yes |
| 552 | HMDB0029639                       | (4-Methylphenyl)acetaldehyde                       | C9H10O  | 133.065938  | No  |
| 552 | HMDB0029697; C02394; CHEBI:33226  | Cinnamyl alcohol                                   | C9H10O  | 133.065938  | No  |
| 552 | HMDB0029698; C02394; CHEBI:33227  | trans-Cinnamyl alcohol                             | C9H10O  | 133.065938  | No  |
| 552 | HMDB0030839                       | (Z)-4-(1-Propenyl)phenol                           | C9H10O  | 133.065938  | No  |
| 552 | HMDB0031626                       | 2-Phenylpropanal                                   | C9H10O  | 133.065938  | No  |
| 552 | HMDB0032024                       | 4-Ethylbenzaldehyde                                | C9H10O  | 133.065938  | No  |
| 552 | HMDB0032142                       | 2,4-Dimethylbenzaldehyde                           | C9H10O  | 133.065938  | No  |
| 552 | HMDB0032608                       | 4''-Methylacetophenone                             | C9H10O  | 133.065938  | No  |
| 552 | HMDB0032623; CHEBI:425902         | 1-Phenyl-1-propanone                               | C9H10O  | 133.065938  | No  |
| 552 | HMDB0033716                       | 3-Phenylpropanal                                   | C9H10O  | 133.065938  | No  |
| 552 | HMDB0034107; C16930; CHEBI:50158  | Chavicol                                           | C9H10O  | 133.065938  | No  |
| 552 | HMDB0034563                       | 7-Nonene-3,5-diyn-1-ol                             | C9H10O  | 133.065938  | No  |
| 552 | HMDB0036441                       | o-Vinylnisole                                      | C9H10O  | 133.065938  | No  |
| 552 | HMDB0059601; C01710; CHEBI:16697  | Indan-1-ol                                         | C9H10O  | 133.065938  | No  |
| 552 | HMDB0059895                       | m-Methylacetophenone                               | C9H10O  | 133.065938  | No  |
| 557 | HMDB0032930; CHEBI:45993          | Benzothiazole                                      | C7H5N5  | 134.0071387 | No  |
| 559 | HMDB0032931                       | 2-Benzoxazolol                                     | C7H5NO2 | 134.0249231 | No  |
| 561 | HMDB0000034; C00147; CHEBI:16708  | Adenine                                            | C5H5N5  | 134.0474863 | Yes |
| 562 | HMDB0001250; C07565; CHEBI:28884  | N-Acetylarlyamine                                  | C8H9NO  | 134.061187  | No  |
| 562 | HMDB0010715; C02505; CHEBI:16562  | 2-Phenylacetamide                                  | C8H9NO  | 134.061187  | No  |
| 562 | HMDB0032628                       | 2-Aminoacetophenone                                | C8H9NO  | 134.061187  | No  |
| 562 | HMDB0032630; CHEBI:91110          | 2''-Aminoacetophenone                              | C8H9NO  | 134.061187  | No  |
| 562 | HMDB0037071                       | 2-Acetyl-4-methylpyridine                          | C8H9NO  | 134.061187  | No  |
| 562 | HMDB0037072                       | 2-Acetyl-6-methylpyridine                          | C8H9NO  | 134.061187  | No  |
| 562 | HMDB0040008                       | 2,3-Dihydro-1H-pyrrolizine-5-carboxaldehyde        | C8H9NO  | 134.061187  | No  |
| 562 | HMDB0040013                       | 5-(2-Furanyl)-3,4-dihydro-2H-pyrrole               | C8H9NO  | 134.061187  | No  |
| 562 | HMDB0040222                       | 2-Acetyl-5-methylpyridine                          | C8H9NO  | 134.061187  | No  |
| 562 | HMDB0040223                       | 4-Acetyl-2-methylpyridine                          | C8H9NO  | 134.061187  | No  |
| 562 | HMDB0040224                       | 4-Acetyl-3-methylpyridine                          | C8H9NO  | 134.061187  | No  |
| 576 | HMDB0000613; CHEBI:37655          | Erythronic acid                                    | C4H8O5  | 135.0300431 | Yes |
| 576 | HMDB0000943; C01620; CHEBI:49059  | Threonic acid                                      | C4H8O5  | 135.0300431 | Yes |
| 576 | HMDB0031160                       | 1-Pentanesulfenothioic acid                        | C5H12S2 | 135.0300431 | Yes |
| 576 | HMDB0033053                       | Ethyl propyl disulfide                             | C5H12S2 | 135.0300431 | Yes |
| 576 | HMDB0033054                       | Ethyl isopropyl disulfide                          | C5H12S2 | 135.0300431 | Yes |
| 576 | HMDB0062620; C01620; CHEBI:15908  | L-threonic Acid                                    | C4H8O5  | 135.0300431 | Yes |
| 577 | HMDB0000209; C07086; CHEBI:30745  | Phenylacetic acid                                  | C8H8O2  | 135.0451893 | No  |
| 577 | HMDB0002340; C07215; CHEBI:36632  | 2-Methylbenzoic acid                               | C8H8O2  | 135.0451893 | No  |
| 577 | HMDB0003767; C03765; CHEBI:15621  | 4-Hydroxyphenylacetaldehyde                        | C8H8O2  | 135.0451893 | No  |
| 577 | HMDB0029635; C01454; CHEBI:36635  | 4-Methylbenzoic acid                               | C8H8O2  | 135.0451893 | No  |
| 577 | HMDB0029686; C10761; CHEBI:366673 | 4-Methoxybenzaldehyde                              | C8H8O2  | 135.0451893 | No  |
| 577 | HMDB0031459                       | 3-Methoxybenzaldehyde                              | C8H8O2  | 135.0451893 | No  |
| 577 | HMDB0032400                       | 3-(5-Methyl-2-furyl)prop-2-enal                    | C8H8O2  | 135.0451893 | No  |
| 577 | HMDB0032568                       | 2''-Hydroxyacetophenone                            | C8H8O2  | 135.0451893 | No  |
| 577 | HMDB0032603                       | 2-Hydroxy-4-methylbenzaldehyde                     | C8H8O2  | 135.0451893 | No  |
| 577 | HMDB0033128                       | 4-(2-Furanyl)-3-buten-2-one                        | C8H8O2  | 135.0451893 | No  |
| 577 | HMDB0033766                       | 2-Methoxybenzaldehyde                              | C8H8O2  | 135.0451893 | No  |
| 577 | HMDB0033968; CHEBI:72775          | Methyl benzoate                                    | C8H8O2  | 135.0451893 | No  |
| 577 | HMDB0038176                       | alpha-Methyl-2-furanacrolein                       | C8H8O2  | 135.0451893 | No  |
| 577 | HMDB0040638                       | 3-(3-Furanyl)-2-methyl-2-propenal                  | C8H8O2  | 135.0451893 | No  |
| 577 | HMDB0040733; C00548; CHEBI:8082   | Phenyl acetate                                     | C8H8O2  | 135.0451893 | No  |
| 577 | HMDB0041485; C05613               | Benzyl formate                                     | C8H8O2  | 135.0451893 | No  |
| 577 | HMDB0062810; C07211; CHEBI:10589  | M-toluic Acid                                      | C8H8O2  | 135.0451893 | No  |

|     |                                   |                                                     |         |             |     |
|-----|-----------------------------------|-----------------------------------------------------|---------|-------------|-----|
| 577 | HMDB0124942                       | 4-ethenylbenzene-1,2-diol                           | C8H8O2  | 135.0451893 | No  |
| 577 | HMDB0125535                       | 5-ethenylbenzene-1,3-diol                           | C8H8O2  | 135.0451893 | No  |
| 577 | HMDB0126385                       | 4-ethenylbenzene-1,3-diol                           | C8H8O2  | 135.0451893 | No  |
| 578 | HMDB0003152; CHEBI:64399          | N-Methylnicotinamide                                | C7H8N2O | 135.0565198 | Yes |
| 578 | HMDB0030001                       | 2-Acetyl-3-methylpyrazine                           | C7H8N2O | 135.0565198 | Yes |
| 578 | HMDB0033947; C17512               | 2-Aminobenzamide                                    | C7H8N2O | 135.0565198 | Yes |
| 578 | HMDB0037819                       | 4-Acetyl-2-methylpyrimidine                         | C7H8N2O | 135.0565198 | Yes |
| 578 | HMDB0059711; CHEBI:68440          | 2-Methylnicotinamide                                | C7H8N2O | 135.0565198 | Yes |
| 578 | HMDB0062267                       | 1,2-Diacylglycerol-Bile-PC-pool                     | C7H8N2O | 135.0565198 | Yes |
| 578 | HMDB0062268                       | 1,2-Diacylglycerol-LD-PC-pool                       | C7H8N2O | 135.0565198 | Yes |
| 580 | HMDB0029667                       | 2,3,6-Trimethylphenol                               | C9H12O  | 135.0803559 | No  |
| 580 | HMDB0031312                       | Benzyl ethyl ether                                  | C9H12O  | 135.0803559 | No  |
| 580 | HMDB0031446                       | p-Isopropylphenol                                   | C9H12O  | 135.0803559 | No  |
| 580 | HMDB0031627                       | 1-Phenyl-1-propanol                                 | C9H12O  | 135.0803559 | No  |
| 580 | HMDB0031628                       | 2-Phenyl-1-propanol                                 | C9H12O  | 135.0803559 | No  |
| 580 | HMDB0032029; CHEBI:38506          | 2-Isopropylphenol                                   | C9H12O  | 135.0803559 | No  |
| 580 | HMDB0032149                       | 1-Methoxy-2,4-dimethylbenzene                       | C9H12O  | 135.0803559 | No  |
| 580 | HMDB0032441                       | Nona-2,4,6-trienal                                  | C9H12O  | 135.0803559 | No  |
| 580 | HMDB0032544                       | 2,4,6-Trimethylphenol                               | C9H12O  | 135.0803559 | No  |
| 580 | HMDB0032621                       | (2-Methoxyethyl)benzene                             | C9H12O  | 135.0803559 | No  |
| 580 | HMDB0032624                       | 2-Propylphenol                                      | C9H12O  | 135.0803559 | No  |
| 580 | HMDB0032625; C14311               | 4-Propylphenol                                      | C9H12O  | 135.0803559 | No  |
| 580 | HMDB0033962                       | 3-Phenyl-1-propanol                                 | C9H12O  | 135.0803559 | No  |
| 580 | HMDB0034378                       | (±)-1-(4-Methylphenyl)ethanol                       | C9H12O  | 135.0803559 | No  |
| 580 | HMDB0038984                       | 4-Ethyl-2-methylphenol                              | C9H12O  | 135.0803559 | No  |
| 580 | HMDB0038985                       | 3-Ethyl-5-methylphenol                              | C9H12O  | 135.0803559 | No  |
| 580 | HMDB0038986                       | 3-Ethyl-4-methylphenol                              | C9H12O  | 135.0803559 | No  |
| 580 | HMDB0038987                       | 2-Ethyl-5-methylphenol                              | C9H12O  | 135.0803559 | No  |
| 580 | HMDB0038988                       | 2-Ethyl-4-methylphenol                              | C9H12O  | 135.0803559 | No  |
| 580 | HMDB0039782                       | 2-(1-Pentenyl)furan                                 | C9H12O  | 135.0803559 | No  |
| 580 | HMDB0059896                       | 6-Ethyl-o-cresol                                    | C9H12O  | 135.0803559 | No  |
| 580 | HMDB0125105                       | 1-ethyl-3-methoxybenzene                            | C9H12O  | 135.0803559 | No  |
| 581 | HMDB0014918; C07430; CHEBI:248018 | Phenelzine                                          | C8H12N2 | 135.0929174 | No  |
| 581 | HMDB0015644; CHEBI:35677          | Betahistine                                         | C8H12N2 | 135.0929174 | No  |
| 581 | HMDB0029727; CHEBI:254553         | 5-Ethyl-2,3-dimethylpyrazine                        | C8H12N2 | 135.0929174 | No  |
| 581 | HMDB0032276                       | 2-Ethyl-3,(5 or 6)-dimethylpyrazine                 | C8H12N2 | 135.0929174 | No  |
| 581 | HMDB0036584; CHEBI:133246         | Tetramethylpyrazine                                 | C8H12N2 | 135.0929174 | No  |
| 581 | HMDB0036808                       | 2,5-Diethylpyrazine                                 | C8H12N2 | 135.0929174 | No  |
| 581 | HMDB0036809                       | 2,6-Diethylpyrazine                                 | C8H12N2 | 135.0929174 | No  |
| 581 | HMDB0037151                       | 2-Isopropyl-5-methylpyrazine                        | C8H12N2 | 135.0929174 | No  |
| 581 | HMDB0040000                       | 2-Methyl-5-propylpyrazine                           | C8H12N2 | 135.0929174 | No  |
| 581 | HMDB0040299                       | 2-Ethyl-3,5-dimethylpyrazine                        | C8H12N2 | 135.0929174 | No  |
| 581 | HMDB0041252                       | 2-Methyl-3-propylpyrazine                           | C8H12N2 | 135.0929174 | No  |
| 581 | HMDB0041253                       | 2,3-Diethylpyrazine                                 | C8H12N2 | 135.0929174 | No  |
| 592 | HMDB0000875; C01004; CHEBI:18123  | Trigonelline                                        | C7H7NO2 | 136.0405969 | Yes |
| 592 | HMDB0001123; C00108; CHEBI:30754  | 2-Aminobenzoic acid                                 | C7H7NO2 | 136.0405969 | Yes |
| 592 | HMDB0001392; C00568; CHEBI:30753  | p-Aminobenzoic acid                                 | C7H7NO2 | 136.0405969 | Yes |
| 592 | HMDB0001538; CHEBI:1220323        | 3-Pyridylacetic acid                                | C7H7NO2 | 136.0405969 | Yes |
| 592 | HMDB0001891; CHEBI:30761          | m-Aminobenzoic acid                                 | C7H7NO2 | 136.0405969 | Yes |
| 592 | HMDB0015687; CHEBI:32114          | Salicylamide                                        | C7H7NO2 | 136.0405969 | Yes |
| 592 | HMDB0029806; CHEBI:451700         | Methyl nicotinate                                   | C7H7NO2 | 136.0405969 | Yes |
| 592 | HMDB0060722                       | 2-Pyridylacetic acid                                | C7H7NO2 | 136.0405969 | Yes |
| 596 | HMDB0000306; C00483; CHEBI:15760  | Tyramine                                            | C8H11NO | 136.0768766 | No  |
| 596 | HMDB0001065; C02735; CHEBI:16343  | 2-Hydroxyphenethylamine                             | C8H11NO | 136.0768766 | No  |
| 596 | HMDB0001466; C01183; CHEBI:17735  | Dimethylaniline-N-oxide                             | C8H11NO | 136.0768766 | No  |
| 596 | HMDB0004989; CHEBI:341165         | m-Tyramine                                          | C8H11NO | 136.0768766 | No  |
| 596 | HMDB0029759                       | 2-Acetyl-1-ethylpyrrole                             | C8H11NO | 136.0768766 | No  |
| 596 | HMDB0039657                       | 1,2,3,4,5,6-Hexahydro-7H-cyclopenta[b]pyridin-7-one | C8H11NO | 136.0768766 | No  |
| 596 | HMDB0040059                       | (±)-2-(2-Furanyl)pyrrolidine                        | C8H11NO | 136.0768766 | No  |
| 596 | HMDB0060681; C16570; CHEBI:55545  | 4-Hydroxy-2,6-dimethylaniline                       | C8H11NO | 136.0768766 | No  |
| 604 | HMDB0036573; CHEBI:39196          | 1,3,5-Trithiane                                     | C3H6S3  | 136.9561755 | No  |



|     |                                  |                                                         |          |             |     |
|-----|----------------------------------|---------------------------------------------------------|----------|-------------|-----|
| 604 | HMDB0040452; CHEBI:39194         | 1,2,3-Trithiane                                         | C3H6S3   | 136.9561755 | No  |
| 611 | HMDB0000500; C00156; CHEBI:30763 | 4-Hydroxybenzoic acid                                   | C7H6O3   | 137.0244702 | No  |
| 611 | HMDB0001895; C00805; CHEBI:16914 | Salicylic acid                                          | C7H6O3   | 137.0244702 | No  |
| 611 | HMDB0002466; C00587; CHEBI:30764 | 3-Hydroxybenzoic acid                                   | C7H6O3   | 137.0244702 | No  |
| 611 | HMDB0004062; C05585; CHEBI:28508 | Gentisate aldehyde                                      | C7H6O3   | 137.0244702 | No  |
| 611 | HMDB0032576                      | 2-Methoxy-1,4-benzoquinone                              | C7H6O3   | 137.0244702 | No  |
| 611 | HMDB0032920                      | alpha-Furyl methyl diketone                             | C7H6O3   | 137.0244702 | No  |
| 611 | HMDB0033812; C10832              | Sesamol                                                 | C7H6O3   | 137.0244702 | No  |
| 611 | HMDB0059965; C16700; CHEBI:50205 | 3,4-Dihydroxybenzaldehyde                               | C7H6O3   | 137.0244702 | No  |
| 611 | HMDB0062484; CHEBI:50198         | keratan sulfate II (core 2-linked), degradation product | C7H6O3   | 137.0244702 | No  |
| 612 | HMDB0012182                      | 8-Hydroxypurine                                         | C5H6N4O  | 137.0475774 | Yes |
| 613 | HMDB0004284; C06044; CHEBI:1879  | Tyrosol                                                 | C8H10O2  | 137.0607603 | Yes |
| 613 | HMDB0029563                      | 3-Acetyl-2,5-dimethylfuran                              | C8H10O2  | 137.0607603 | Yes |
| 613 | HMDB0029671; CHEBI:1167379       | 1,4-Dimethoxybenzene                                    | C8H10O2  | 137.0607603 | Yes |
| 613 | HMDB0029672                      | 1,3-Dimethoxybenzene                                    | C8H10O2  | 137.0607603 | Yes |
| 613 | HMDB0032036                      | 4-Ethoxyphenol                                          | C8H10O2  | 137.0607603 | Yes |
| 613 | HMDB0032136                      | 2-Methoxy-4-methylphenol                                | C8H10O2  | 137.0607603 | Yes |
| 613 | HMDB0032137                      | 2,6-Dimethyl-1,4-benzenediol                            | C8H10O2  | 137.0607603 | Yes |
| 613 | HMDB0032139; CHEBI:59114         | 1,2-Dimethoxybenzene                                    | C8H10O2  | 137.0607603 | Yes |
| 613 | HMDB0032159                      | 2-Acetyl-3,5-dimethylfuran                              | C8H10O2  | 137.0607603 | Yes |
| 613 | HMDB0032290                      | 1-(2-Furyl)butan-3-one                                  | C8H10O2  | 137.0607603 | Yes |
| 613 | HMDB0034241                      | 4-Methoxybenzyl alcohol                                 | C8H10O2  | 137.0607603 | Yes |
| 613 | HMDB0039802                      | 1-(2-Furanyl)-1-butanone                                | C8H10O2  | 137.0607603 | Yes |
| 613 | HMDB0040174                      | 4-Ethyl-1,2-benzenediol                                 | C8H10O2  | 137.0607603 | Yes |
| 613 | HMDB0040177; C06728; CHEBI:16572 | 3-Ethyl-1,2-benzenediol                                 | C8H10O2  | 137.0607603 | Yes |
| 613 | HMDB0041607; CHEBI:64275         | 2-Phenoxyethanol                                        | C8H10O2  | 137.0607603 | Yes |
| 613 | HMDB0125590                      | 5-ethylbenzene-1,3-diol                                 | C8H10O2  | 137.0607603 | Yes |
| 613 | HMDB0126388                      | 4-ethylbenzene-1,3-diol                                 | C8H10O2  | 137.0607603 | Yes |
| 614 | HMDB0031850                      | 2-Ethoxy-3-methylpyrazine                               | C7H10N2O | 137.0718913 | No  |
| 614 | HMDB0040054                      | 3-Ethyl-2-methoxypyrazine                               | C7H10N2O | 137.0718913 | No  |
| 614 | HMDB0040142                      | 2-Ethoxy-5-methylpyrazine                               | C7H10N2O | 137.0718913 | No  |
| 614 | HMDB0040144                      | 2-Ethoxy-6-methylpyrazine                               | C7H10N2O | 137.0718913 | No  |
| 614 | HMDB0040911                      | 2-Methoxy-3,5-dimethylpyrimidine                        | C7H10N2O | 137.0718913 | No  |
| 628 | HMDB0012153                      | 3,4-Dihydroxybenzylamine                                | C7H9NO2  | 138.056225  | Yes |
| 628 | HMDB0038174                      | 5-Acetyl-2,4-dimethylloxazole                           | C7H9NO2  | 138.056225  | Yes |
| 628 | HMDB0059856                      | Ethyl 2-pyrrolicarboxylate                              | C7H9NO2  | 138.056225  | Yes |
| 641 | HMDB0032571                      | 2-Methoxybenzenethiol                                   | C7H8OS   | 139.0232497 | Yes |
| 641 | HMDB0032922                      | Kahweofuran                                             | C7H8OS   | 139.0232497 | Yes |
| 641 | HMDB0033130                      | 2-Acetyl-5-methylthiophene                              | C7H8OS   | 139.0232497 | Yes |
| 641 | HMDB0033159                      | 2-Propanoylthiophene                                    | C7H8OS   | 139.0232497 | Yes |
| 641 | HMDB0041281                      | 2-(Methylthio)phenol                                    | C7H8OS   | 139.0232497 | Yes |
| 641 | HMDB0041502                      | 2-Acetyl-3-methylthiophene                              | C7H8OS   | 139.0232497 | Yes |
| 643 | HMDB0002144; CHEBI:108884        | 1,3-Dimethyluracil                                      | C6H8N2O2 | 139.0490997 | Yes |
| 643 | HMDB0002271; CHEBI:232595        | Imidazolepropionic acid                                 | C6H8N2O2 | 139.0490997 | Yes |
| 643 | HMDB0002820; C05828              | Methylimidazoleacetic acid                              | C6H8N2O2 | 139.0490997 | Yes |
| 643 | HMDB0004988                      | Pi-Methylimidazoleacetic acid                           | C6H8N2O2 | 139.0490997 | Yes |
| 644 | HMDB0040236                      | 3,4-Diethylthiophene                                    | C8H12S   | 139.0589662 | Yes |
| 645 | HMDB0032311                      | 2,4-Hexadienyl acetate                                  | C8H12O2  | 139.0750888 | Yes |
| 645 | HMDB0036176                      | 3-Ethyl-2-hydroxy-4-methyl-2-cyclopenten-1-one          | C8H12O2  | 139.0750888 | Yes |
| 645 | HMDB0037167                      | 3-Ethyl-5-methyl-1,2-cyclopentanedione                  | C8H12O2  | 139.0750888 | Yes |
| 645 | HMDB0037196                      | Ethyl 2-methyl-3,4-pentadienoate                        | C8H12O2  | 139.0750888 | Yes |
| 645 | HMDB0037625                      | Allyl tiglate                                           | C8H12O2  | 139.0750888 | Yes |
| 645 | HMDB0039651                      | 3-Propyl-1,2-cyclopentanedione                          | C8H12O2  | 139.0750888 | Yes |
| 645 | HMDB0039652                      | 2-Hydroxy-3,4,5-trimethyl-2-cyclopenten-1-one           | C8H12O2  | 139.0750888 | Yes |
| 645 | HMDB0039673                      | 4-Ethyl-2-hydroxy-3-methyl-2-cyclopenten-1-one          | C8H12O2  | 139.0750888 | Yes |
| 645 | HMDB0039680                      | 3,5,5-Trimethyl-1,2-cyclopentanedione                   | C8H12O2  | 139.0750888 | Yes |
| 645 | HMDB0039681                      | 3-Isopropyl-1,2-cyclopentanedione                       | C8H12O2  | 139.0750888 | Yes |
| 645 | HMDB0040463                      | Ethyl sorbate                                           | C8H12O2  | 139.0750888 | Yes |
| 645 | HMDB0040526                      | 3,4,4-Trimethyl-1,2-cyclopentanedione                   | C8H12O2  | 139.0750888 | Yes |
| 645 | HMDB0060682; C16656; CHEBI:80642 | 2-Propyl-2,4-pentadienoic acid                          | C8H12O2  | 139.0750888 | Yes |
| 648 | HMDB0030957                      | (3Z,6Z)-3,6-Nonadien-1-ol                               | C9H16O   | 139.1128068 | No  |

|     |                                   |                                           |          |             |     |
|-----|-----------------------------------|-------------------------------------------|----------|-------------|-----|
| 648 | HMDB0030958                       | (Z)-6-Nonenal                             | C9H16O   | 139.1128068 | No  |
| 648 | HMDB0031262                       | 2,6-Nonadien-1-ol                         | C9H16O   | 139.1128068 | No  |
| 648 | HMDB0031269                       | 2-Nonenal                                 | C9H16O   | 139.1128068 | No  |
| 648 | HMDB0031834                       | (±)-2,6-Dimethyl-5-heptenal               | C9H16O   | 139.1128068 | No  |
| 648 | HMDB0032535                       | trans-4-Nonenal                           | C9H16O   | 139.1128068 | No  |
| 648 | HMDB0033554                       | 2-Methyl-2-octenal                        | C9H16O   | 139.1128068 | No  |
| 648 | HMDB0033794                       | (±)-2,2,6-Trimethylcyclohexanone          | C9H16O   | 139.1128068 | No  |
| 648 | HMDB0034758                       | 8-Nonen-3-one                             | C9H16O   | 139.1128068 | No  |
| 648 | HMDB0034761                       | 5-Nonen-2-one                             | C9H16O   | 139.1128068 | No  |
| 648 | HMDB0034764                       | 3-Nonen-2-one                             | C9H16O   | 139.1128068 | No  |
| 648 | HMDB0034845                       | 2,4-Nonadien-1-ol                         | C9H16O   | 139.1128068 | No  |
| 648 | HMDB0035916                       | (E)-2-Nonen-4-one                         | C9H16O   | 139.1128068 | No  |
| 648 | HMDB0035926                       | 8-Nonen-2-one                             | C9H16O   | 139.1128068 | No  |
| 648 | HMDB0035927                       | 1-Nonen-4-one                             | C9H16O   | 139.1128068 | No  |
| 648 | HMDB0037001                       | Santene hydrate                           | C9H16O   | 139.1128068 | No  |
| 648 | HMDB0037150                       | 2-Ethyl-2-heptenal                        | C9H16O   | 139.1128068 | No  |
| 648 | HMDB0037170                       | 3-Methylene-2-octanone                    | C9H16O   | 139.1128068 | No  |
| 648 | HMDB0038067                       | (3E,6Z)-3,6-Nonadien-1-ol                 | C9H16O   | 139.1128068 | No  |
| 648 | HMDB0038400                       | (2xi,4xi)-2,4-Nonadien-1-ol               | C9H16O   | 139.1128068 | No  |
| 648 | HMDB0039461                       | 7-Methyl-3-octen-2-one                    | C9H16O   | 139.1128068 | No  |
| 648 | HMDB0059828                       | 3-Nonen-5-one                             | C9H16O   | 139.1128068 | No  |
| 648 | HMDB0062671; CHEBI:84226          | (3E)-2,3,4-trimethylhex-3-enal            | C9H16O   | 139.1128068 | No  |
| 654 | HMDB0001096; C00169; CHEBI:17672  | Carbamoyl phosphate                       | CH4NO5P  | 139.9756645 | No  |
| 661 | HMDB0014731; C07505; CHEBI:4887   | Ethosuximide                              | C7H11NO2 | 140.0717535 | No  |
| 661 | HMDB0029427; C08287               | L-Hypoglycin A                            | C7H11NO2 | 140.0717535 | No  |
| 661 | HMDB0030352; C10128; CHEBI:226311 | Arecaidine                                | C7H11NO2 | 140.0717535 | No  |
| 662 | HMDB0003431; C00860; CHEBI:16255  | L-Histidinol                              | C6H11N3O | 140.0828606 | No  |
| 663 | HMDB0030324                       | (R)-Pelletierine                          | C8H15NO  | 140.1083952 | No  |
| 663 | HMDB0030325; C06182               | (±)-Pelletierine                          | C8H15NO  | 140.1083952 | No  |
| 663 | HMDB0030338; C10864               | Physoperuvine                             | C8H15NO  | 140.1083952 | No  |
| 663 | HMDB0033364                       | Conhydrinone                              | C8H15NO  | 140.1083952 | No  |
| 663 | HMDB0039839                       | 1-(1-Pyrrolidinyl)-2-butanone             | C8H15NO  | 140.1083952 | No  |
| 663 | HMDB0039840                       | 3-(1-Pyrrolidinyl)-2-butanone             | C8H15NO  | 140.1083952 | No  |
| 669 | HMDB0029719                       | Methyl thiophene-2-carboxylate            | C6H6O2S  | 141.001827  | No  |
| 669 | HMDB0037731                       | S-(2-Furanylmethyl) methanethioate        | C6H6O2S  | 141.001827  | No  |
| 669 | HMDB0037762                       | Methyl 2-thiofuroate                      | C6H6O2S  | 141.001827  | No  |
| 670 | HMDB0002349; CHEBI:27036          | trans-trans-Muconic acid                  | C6H6O4   | 141.020043  | Yes |
| 670 | HMDB0002432; CHEBI:563718         | Sumiki's acid                             | C6H6O4   | 141.020043  | Yes |
| 670 | HMDB0006331; C02480; CHEBI:16508  | cis,cis-Muconic acid                      | C6H6O4   | 141.020043  | Yes |
| 670 | HMDB0032923; C14516; CHEBI:34805  | Kojic acid                                | C6H6O4   | 141.020043  | Yes |
| 670 | HMDB0032988                       | 5-Hydroxymaltol                           | C6H6O4   | 141.020043  | Yes |
| 670 | HMDB0059762                       | 2,3-Methylenesuccinic acid                | C6H6O4   | 141.020043  | Yes |
| 670 | HMDB0125218                       | benzene-1,2,3,5-tetrol                    | C6H6O4   | 141.020043  | Yes |
| 670 | HMDB0134002                       | benzene-1,2,3,4-tetrol                    | C6H6O4   | 141.020043  | Yes |
| 674 | HMDB0033551                       | 5-Ethyl-3-hydroxy-4-methyl-2(5H)-furanone | C7H10O3  | 141.0558597 | No  |
| 674 | HMDB0033736                       | Homofureanol                              | C7H10O3  | 141.0558597 | No  |
| 674 | HMDB0034230                       | Mesifurane                                | C7H10O3  | 141.0558597 | No  |
| 674 | HMDB0041426                       | Erinapyrone A                             | C7H10O3  | 141.0558597 | No  |
| 674 | HMDB0041427                       | Erinapyrone B                             | C7H10O3  | 141.0558597 | No  |
| 676 | HMDB0032860; C14082; CHEBI:50717  | 1-Methylnaphthalene                       | C11H10   | 141.0709926 | No  |
| 678 | HMDB0000392                       | 2-Octenoic acid                           | C8H14O2  | 141.0920176 | Yes |
| 678 | HMDB0001568; CHEBI:86544          | trans-2-Octenoic acid                     | C8H14O2  | 141.0920176 | Yes |
| 678 | HMDB0013897; C16648; CHEBI:410867 | 4-ene-Valproic acid                       | C8H14O2  | 141.0920176 | Yes |
| 678 | HMDB0013902; C16653; CHEBI:288752 | 2-ene-Valproic acid                       | C8H14O2  | 141.0920176 | Yes |
| 678 | HMDB0013903; C16654               | (3Z)-2-Propylpent-3-enoic acid            | C8H14O2  | 141.0920176 | Yes |
| 678 | HMDB0013904                       | (3E)-2-Propylpent-3-enoic acid            | C8H14O2  | 141.0920176 | Yes |
| 678 | HMDB0029761                       | Ethyl (±)-2-methyl-4-pentenoate           | C8H14O2  | 141.0920176 | Yes |
| 678 | HMDB0031293                       | 2,3-Octanedione                           | C8H14O2  | 141.0920176 | Yes |
| 678 | HMDB0031343                       | Methyl cyclohexanecarboxylate             | C8H14O2  | 141.0920176 | Yes |
| 678 | HMDB0031352; C12297               | Cyclohexyl acetate                        | C8H14O2  | 141.0920176 | Yes |
| 678 | HMDB0031403; CHEBI:37277          | Cyclohexanecetic acid                     | C8H14O2  | 141.0920176 | Yes |

|     |                                  |                                       |          |             |     |
|-----|----------------------------------|---------------------------------------|----------|-------------|-----|
| 678 | HMDB0032164                      | Allyl valerate                        | C8H14O2  | 141.0920176 | Yes |
| 678 | HMDB0032207                      | cis-5-Octenoic acid                   | C8H14O2  | 141.0920176 | Yes |
| 678 | HMDB0032266                      | Ethyl (E)-3-hexenoate                 | C8H14O2  | 141.0920176 | Yes |
| 678 | HMDB0032267; CHEBI:87299         | Ethyl 5-hexenoate                     | C8H14O2  | 141.0920176 | Yes |
| 678 | HMDB0032268                      | Ethyl 2E-hexenoate                    | C8H14O2  | 141.0920176 | Yes |
| 678 | HMDB0032278                      | Ethyl trans-2-methyl-2-pentenoate     | C8H14O2  | 141.0920176 | Yes |
| 678 | HMDB0032533                      | trans-3-Hexenyl acetate               | C8H14O2  | 141.0920176 | Yes |
| 678 | HMDB0035422                      | 4-Butyl-gamma-butyrolactone           | C8H14O2  | 141.0920176 | Yes |
| 678 | HMDB0036212                      | 2-Methylpropyl (2E)-butenoate         | C8H14O2  | 141.0920176 | Yes |
| 678 | HMDB0036236                      | 2-Methylallyl butyrate                | C8H14O2  | 141.0920176 | Yes |
| 678 | HMDB0037622                      | Ethyl 2-methyl-3-pentenoate           | C8H14O2  | 141.0920176 | Yes |
| 678 | HMDB0037624                      | Isopropyl tiglate                     | C8H14O2  | 141.0920176 | Yes |
| 678 | HMDB0037630                      | xi-Tetrahydro-3-propyl-2H-pyran-2-one | C8H14O2  | 141.0920176 | Yes |
| 678 | HMDB0038036; C19318              | 2-Propenyl 3-methylbutanoate          | C8H14O2  | 141.0920176 | Yes |
| 678 | HMDB0038310                      | xi-Tetrahydro-6-propyl-2H-pyran-2-one | C8H14O2  | 141.0920176 | Yes |
| 678 | HMDB0039793; CHEBI:37316         | (E)-4-Octenoic acid                   | C8H14O2  | 141.0920176 | Yes |
| 678 | HMDB0039872                      | Methyl 2-heptenoate                   | C8H14O2  | 141.0920176 | Yes |
| 678 | HMDB0040212                      | 2-Hexenyl acetate                     | C8H14O2  | 141.0920176 | Yes |
| 678 | HMDB0040215; C19757; CHEBI:61316 | cis-3-Hexenyl acetate                 | C8H14O2  | 141.0920176 | Yes |
| 678 | HMDB0059908; CHEBI:87560         | Ethyl-3-hexanoate                     | C8H14O2  | 141.0920176 | Yes |
| 679 | HMDB0013821                      | 2-Methyl-4-heptanone                  | C9H18O   | 141.1285556 | No  |
| 679 | HMDB0029557; CHEBI:59065         | Dihydroisophorol                      | C9H18O   | 141.1285556 | No  |
| 679 | HMDB0030959                      | (Z)-3-Nonen-1-ol                      | C9H18O   | 141.1285556 | No  |
| 679 | HMDB0031266; CHEBI:77927         | 2-Nonanone                            | C9H18O   | 141.1285556 | No  |
| 679 | HMDB0031267                      | 3-Nonanone                            | C9H18O   | 141.1285556 | No  |
| 679 | HMDB0031268                      | Amyl propyl ketone                    | C9H18O   | 141.1285556 | No  |
| 679 | HMDB0031417                      | 2,6-Dimethyl-4-heptanone              | C9H18O   | 141.1285556 | No  |
| 679 | HMDB0031684                      | 2-Methyloctanal                       | C9H18O   | 141.1285556 | No  |
| 679 | HMDB0031730                      | 3,5,5-Trimethylhexanal                | C9H18O   | 141.1285556 | No  |
| 679 | HMDB0034152                      | 1-Nonen-3-ol                          | C9H18O   | 141.1285556 | No  |
| 679 | HMDB0037304                      | (±)-2,6-Dimethyl-6-hepten-1-ol        | C9H18O   | 141.1285556 | No  |
| 679 | HMDB0040581                      | (Z)-6-Nonen-1-ol                      | C9H18O   | 141.1285556 | No  |
| 679 | HMDB0041498                      | 2-Nonen-1-ol                          | C9H18O   | 141.1285556 | No  |
| 679 | HMDB0041499                      | (Z)-2-Nonen-1-ol                      | C9H18O   | 141.1285556 | No  |
| 679 | HMDB0041601                      | (E)-3-Nonen-1-ol                      | C9H18O   | 141.1285556 | No  |
| 679 | HMDB0059835; CHEBI:84268         | Nonanal                               | C9H18O   | 141.1285556 | No  |
| 679 | HMDB0059887                      | (E)-6-Nonenol                         | C9H18O   | 141.1285556 | No  |
| 690 | HMDB0000894; CHEBI:74435         | Vinylacetylglycine                    | C6H9NO3  | 142.0511672 | No  |
| 690 | HMDB0014491; CHEBI:131804        | Trimethadione                         | C6H9NO3  | 142.0511672 | No  |
| 690 | HMDB0032161; CHEBI:415036        | Acrylamide-acrylic acid resin         | C6H9NO3  | 142.0511672 | No  |
| 690 | HMDB0061082                      | 5-ethyl-5-methyl-2,4-oxazolidinedione | C6H9NO3  | 142.0511672 | No  |
| 690 | HMDB0061705; CHEBI:87998         | 6-Oxopiperidine-2-carboxylic acid     | C6H9NO3  | 142.0511672 | No  |
| 692 | HMDB0033115                      | 6-Methylquinoline                     | C10H9N   | 142.066062  | Yes |
| 692 | HMDB0041802; C02227; CHEBI:27878 | 2-Aminonaphthalene                    | C10H9N   | 142.066062  | Yes |
| 692 | HMDB0042004; CHEBI:132813        | Quinaldine                            | C10H9N   | 142.066062  | Yes |
| 694 | HMDB0004827; C10172; CHEBI:35280 | Proline betaine                       | C7H13NO2 | 142.0872731 | No  |
| 694 | HMDB0030410                      | L-2-Amino-3-methylenehexanoic acid    | C7H13NO2 | 142.0872731 | No  |
| 694 | HMDB0038949                      | 3beta,6beta-Dihydroxynortropine       | C7H13NO2 | 142.0872731 | No  |
| 703 | HMDB0032429                      | 3-(Methylthio)methylthiophene         | C6H8S2   | 142.9987484 | No  |
| 703 | HMDB0034901                      | 2-Vinyl-4H-1,3-dithiine               | C6H8S2   | 142.9987484 | No  |
| 703 | HMDB0040259                      | 2-Methyl-5-(methylthio)thiophene      | C6H8S2   | 142.9987484 | No  |
| 703 | HMDB0062781; CHEBI:16810         | 2-oxoglutarate(2-)                    | C5H4O5   | 142.9987484 | No  |
| 705 | HMDB0000393; CHEBI:86952         | 3-Hexenedioic acid                    | C6H8O4   | 143.0349614 | Yes |
| 705 | HMDB0000522; CHEBI:37245         | 3-Methylglutaconic acid               | C6H8O4   | 143.0349614 | Yes |
| 705 | HMDB0002266                      | (E)-2-Methylglutaconic acid           | C6H8O4   | 143.0349614 | Yes |
| 705 | HMDB0013311; CHEBI:49296         | trans-2-Hexenedioic acid              | C6H8O4   | 143.0349614 | Yes |
| 705 | HMDB0029171                      | 3-Hydroxyadipic acid 3,6-lactone      | C6H8O4   | 143.0349614 | Yes |
| 705 | HMDB0031257; CHEBI:35460         | Dimethyl fumarate                     | C6H8O4   | 143.0349614 | Yes |
| 705 | HMDB0036232; C00922; CHEBI:23812 | Maleic acid homopolymer               | C6H8O4   | 143.0349614 | Yes |
| 705 | HMDB0040207                      | Ethyl hydrogen fumarate               | C6H8O4   | 143.0349614 | Yes |
| 706 | HMDB0041946; C19485              | N-Nitrosoproline                      | C5H8N2O3 | 143.04645   | No  |

|     |                                   |                                                      |          |             |     |
|-----|-----------------------------------|------------------------------------------------------|----------|-------------|-----|
| 707 | HMDB0006215; CHEBI:52431          | Naphthalene epoxide                                  | C10H8O   | 143.0503285 | No  |
| 707 | HMDB0012138; C11714; CHEBI:10319  | 1-Naphthol                                           | C10H8O   | 143.0503285 | No  |
| 707 | HMDB0012322; C11713; CHEBI:10432  | 2-Naphthol                                           | C10H8O   | 143.0503285 | No  |
| 707 | HMDB0031001                       | (Z)-2-Decene-4,6,8-triyn-1-ol                        | C10H8O   | 143.0503285 | No  |
| 707 | HMDB0060301; C14787; CHEBI:34001  | (1S,2R)-Naphthalene 1,2-oxide                        | C10H8O   | 143.0503285 | No  |
| 709 | HMDB0001988; CHEBI:16817          | 4-Hydroxycyclohexylcarboxylic acid                   | C7H12O3  | 143.0714134 | Yes |
| 709 | HMDB0031176                       | Tetrahydrofurfuryl acetate                           | C7H12O3  | 143.0714134 | Yes |
| 709 | HMDB0036594                       | Botryodiplodin                                       | C7H12O3  | 143.0714134 | Yes |
| 709 | HMDB0037114                       | Methyl (R)-3-methyl-2-oxopentanoate                  | C7H12O3  | 143.0714134 | Yes |
| 709 | HMDB0040433                       | Ethyl levulinate                                     | C7H12O3  | 143.0714134 | Yes |
| 711 | HMDB0000482; C06423; CHEBI:28837  | Caprylic acid                                        | C8H16O2  | 143.1077039 | No  |
| 711 | HMDB0001877; C07185; CHEBI:39867  | Valproic acid                                        | C8H16O2  | 143.1077039 | No  |
| 711 | HMDB0029980; CHEBI:87510          | Hexyl acetate                                        | C8H16O2  | 143.1077039 | No  |
| 711 | HMDB0030368                       | (3R,5Z)-5-Octene-1,3-diol                            | C8H16O2  | 143.1077039 | No  |
| 711 | HMDB0031230; CHEBI:744024         | 2-Ethylhexanoic acid                                 | C8H16O2  | 143.1077039 | No  |
| 711 | HMDB0031290                       | 1-Hydroxy-3-octanone                                 | C8H16O2  | 143.1077039 | No  |
| 711 | HMDB0031478                       | Methyl heptanoate                                    | C8H16O2  | 143.1077039 | No  |
| 711 | HMDB0031579                       | Ethyl (±)-2-methylpentanoate                         | C8H16O2  | 143.1077039 | No  |
| 711 | HMDB0031587                       | 2-Methylheptanoic acid                               | C8H16O2  | 143.1077039 | No  |
| 711 | HMDB0031588                       | 6-Methylheptanoic acid                               | C8H16O2  | 143.1077039 | No  |
| 711 | HMDB0031596                       | Methyl 5-methylhexanoate                             | C8H16O2  | 143.1077039 | No  |
| 711 | HMDB0031638                       | Pentyl propanoate                                    | C8H16O2  | 143.1077039 | No  |
| 711 | HMDB0031703                       | 2-Ethylbutyl acetate                                 | C8H16O2  | 143.1077039 | No  |
| 711 | HMDB0032046                       | Isopropyl 3-methylbutanoate                          | C8H16O2  | 143.1077039 | No  |
| 711 | HMDB0032047                       | Propyl 3-methylbutanoate                             | C8H16O2  | 143.1077039 | No  |
| 711 | HMDB0032203                       | cis- and trans-2-Isobutyl-4-methyl-1,3-dioxolane     | C8H16O2  | 143.1077039 | No  |
| 711 | HMDB0032225                       | 1,1-Dimethoxy-trans-2-hexene                         | C8H16O2  | 143.1077039 | No  |
| 711 | HMDB0032272                       | Ethyl 4-methylpentanoate                             | C8H16O2  | 143.1077039 | No  |
| 711 | HMDB0032335                       | 3-Hydroxy-2-octanone                                 | C8H16O2  | 143.1077039 | No  |
| 711 | HMDB0032551                       | Valeraldehyde propyleneglycol acetal                 | C8H16O2  | 143.1077039 | No  |
| 711 | HMDB0034161; CHEBI:87683          | 2-Methylpropyl butanoate                             | C8H16O2  | 143.1077039 | No  |
| 711 | HMDB0034164; CHEBI:87419          | 3-Methylbutyl propanoate                             | C8H16O2  | 143.1077039 | No  |
| 711 | HMDB0034234                       | Ethyl (±)-3-methylpentanoate                         | C8H16O2  | 143.1077039 | No  |
| 711 | HMDB0034459                       | Heptyl formate                                       | C8H16O2  | 143.1077039 | No  |
| 711 | HMDB0035457                       | (±)-5-Hydroxy-4-octanone                             | C8H16O2  | 143.1077039 | No  |
| 711 | HMDB0036165                       | 3-(Hydroxymethyl)-2-heptanone                        | C8H16O2  | 143.1077039 | No  |
| 711 | HMDB0039217                       | Isopropyl 2-methylbutanoate                          | C8H16O2  | 143.1077039 | No  |
| 711 | HMDB0039620; CHEBI:87429          | Butyl butyrate                                       | C8H16O2  | 143.1077039 | No  |
| 711 | HMDB0040209; CHEBI:86055          | Ethyl hexanoate                                      | C8H16O2  | 143.1077039 | No  |
| 711 | HMDB0040251                       | Butyl isobutyrate                                    | C8H16O2  | 143.1077039 | No  |
| 711 | HMDB0040252                       | Isobutyl isobutyrate                                 | C8H16O2  | 143.1077039 | No  |
| 711 | HMDB0040296                       | Propyl pentanoate                                    | C8H16O2  | 143.1077039 | No  |
| 711 | HMDB0040298                       | Ethyl 2-ethylbutanoate                               | C8H16O2  | 143.1077039 | No  |
| 711 | HMDB0061931; CHEBI:88826          | Tetrahydro-2,5-dimethyl-2H-pyranmethanol             | C8H16O2  | 143.1077039 | No  |
| 718 | HMDB0001552; C00940; CHEBI:30882  | 2-Keto-glutaramic acid                               | C5H7NO4  | 144.0291855 | Yes |
| 719 | HMDB0029737; C08493; CHEBI:343043 | 1H-Indole-3-carboxaldehyde                           | C9H7NO   | 144.0455038 | Yes |
| 721 | HMDB0000730; CHEBI:70979          | Isobutyrylglycine                                    | C6H11NO3 | 144.066675  | Yes |
| 721 | HMDB0000808; CHEBI:89963          | N-Butyrylglycine                                     | C6H11NO3 | 144.066675  | Yes |
| 721 | HMDB0001263; C01475; CHEBI:17027  | Allysine                                             | C6H11NO3 | 144.066675  | Yes |
| 721 | HMDB0003681; C02946; CHEBI:17645  | 4-Acetamidobutanoic acid                             | C6H11NO3 | 144.066675  | Yes |
| 721 | HMDB0012131; C03656; CHEBI:27713  | (S)-5-Amino-3-oxohexanoate                           | C6H11NO3 | 144.066675  | Yes |
| 721 | HMDB0012151; C03239; CHEBI:17534  | 2-Keto-6-aminocaproate                               | C6H11NO3 | 144.066675  | Yes |
| 721 | HMDB0015127; CHEBI:724125         | Methyl aminolevulinate                               | C6H11NO3 | 144.066675  | Yes |
| 721 | HMDB0029425                       | L-cis-4-(Hydroxymethyl)-2-pyrrolidinecarboxylic acid | C6H11NO3 | 144.066675  | Yes |
| 721 | HMDB0029426; CHEBI:74048          | L-trans-5-Hydroxy-2-piperidinecarboxylic acid        | C6H11NO3 | 144.066675  | Yes |
| 721 | HMDB0059595; C04076; CHEBI:17917  | (S)-2-amino-6-oxohexanoate                           | C6H11NO3 | 144.066675  | Yes |
| 721 | HMDB0060265                       | 4-Acetamidobutanoate                                 | C6H11NO3 | 144.066675  | Yes |
| 721 | HMDB0061156                       | N-(2-Carboxymethyl)-morpholine                       | C6H11NO3 | 144.066675  | Yes |
| 721 | HMDB0094698                       | N-Propionylalanine                                   | C6H11NO3 | 144.066675  | Yes |
| 723 | HMDB0006831; C05543; CHEBI:16244  | 3-Dehydrocarnitine                                   | C7H15NO2 | 144.1029963 | No  |
| 723 | HMDB0094649; CHEBI:64304          | 2-Aminoheptanoate                                    | C7H15NO2 | 144.1029963 | No  |

|     |                                   |                                                     |           |             |     |
|-----|-----------------------------------|-----------------------------------------------------|-----------|-------------|-----|
| 733 | HMDB0000208; C00026; CHEBI:30915  | Oxoglutaric acid                                    | C5H6O5    | 145.0144049 | Yes |
| 733 | HMDB0013701                       | 3-Oxoglutaric acid                                  | C5H6O5    | 145.0144049 | Yes |
| 733 | HMDB0033966; C08369; CHEBI:4488   | Di-2-propenyl disulfide, 9CI                        | C6H10S2   | 145.0144049 | Yes |
| 733 | HMDB0041390                       | (E,E)-Di-1-propenyl disulfide                       | C6H10S2   | 145.0144049 | Yes |
| 733 | HMDB0041393                       | (E)-1-Propenyl 2-propenyl disulfide                 | C6H10S2   | 145.0144049 | Yes |
| 733 | HMDB0062739; CHEBI:87810          | 3-methylmalate(2-)                                  | C5H6O5    | 145.0144049 | Yes |
| 734 | HMDB0001218; C05851; CHEBI:28794  | Coumarin                                            | C9H6O2    | 145.029875  | No  |
| 734 | HMDB0002359                       | Phenylpropionic acid                                | C9H6O2    | 145.029875  | No  |
| 734 | HMDB0032938; CHEBI:72013          | Chromone                                            | C9H6O2    | 145.029875  | No  |
| 734 | HMDB0033183                       | 2-Benzofurancarboxaldehyde                          | C9H6O2    | 145.029875  | No  |
| 736 | HMDB0062599; CHEBI:84282          | 2-methyl-1,3-thiazolidine-2-carboxamide             | C5H10N2OS | 145.0463489 | No  |
| 737 | HMDB0000422; CHEBI:68567          | 2-Methylglutaric acid                               | C6H10O4   | 145.0508371 | No  |
| 737 | HMDB0000448; C06104; CHEBI:30832  | Adipic acid                                         | C6H10O4   | 145.0508371 | No  |
| 737 | HMDB0000752; CHEBI:68566          | Methylglutaric acid                                 | C6H10O4   | 145.0508371 | No  |
| 737 | HMDB0000858; CHEBI:1007322        | Monomethyl glutaric acid                            | C6H10O4   | 145.0508371 | No  |
| 737 | HMDB0002074; CHEBI:86537          | 2,2-Dimethylsuccinic acid                           | C6H10O4   | 145.0508371 | No  |
| 737 | HMDB0002173; CHEBI:89760          | Solerol                                             | C6H10O4   | 145.0508371 | No  |
| 737 | HMDB0006900; C06006; CHEBI:27681  | (S)-2-Aceto-2-hydroxybutanoic acid                  | C6H10O4   | 145.0508371 | No  |
| 737 | HMDB0033837                       | Dimethyl succinate                                  | C6H10O4   | 145.0508371 | No  |
| 737 | HMDB0061930                       | 4-Ethoxy-4-oxobutanoic acid                         | C6H10O4   | 145.0508371 | No  |
| 738 | HMDB0000641; C00064; CHEBI:18050  | L-Glutamine                                         | C5H10N2O3 | 145.061903  | Yes |
| 738 | HMDB0002031; C05100; CHEBI:1670   | Ureidoisobutyric acid                               | C5H10N2O3 | 145.061903  | Yes |
| 738 | HMDB0003423; C00819; CHEBI:17061  | D-Glutamine                                         | C5H10N2O3 | 145.061903  | Yes |
| 738 | HMDB0006899; CHEBI:185249         | Alanylglycine                                       | C5H10N2O3 | 145.061903  | Yes |
| 738 | HMDB0028687                       | Alanyl-Glycine                                      | C5H10N2O3 | 145.061903  | Yes |
| 740 | HMDB0000182; C00047; CHEBI:18019  | L-Lysine                                            | C6H14N2O2 | 145.0982932 | Yes |
| 740 | HMDB0003405; C00739; CHEBI:16855  | D-Lysine                                            | C6H14N2O2 | 145.0982932 | Yes |
| 740 | HMDB0012114; C01142; CHEBI:15613  | (3S)-3,6-Diaminohexanoate                           | C6H14N2O2 | 145.0982932 | Yes |
| 740 | HMDB0012115; C01186; CHEBI:15616  | (3S,5S)-3,5-Diaminohexanoate                        | C6H14N2O2 | 145.0982932 | Yes |
| 740 | HMDB0142894                       | 2,6-diaminohexanoic acid                            | C6H14N2O2 | 145.0982932 | Yes |
| 741 | HMDB0029359                       | (R)-1,3-Octanediol                                  | C8H18O2   | 145.1236908 | No  |
| 741 | HMDB0037635; CHEBI:87383          | xi-1-Ethoxy-1-butoxyethane                          | C8H18O2   | 145.1236908 | No  |
| 741 | HMDB0038679                       | 1-Methoxy-1-pentyloxyethane                         | C8H18O2   | 145.1236908 | No  |
| 748 | HMDB0034370                       | Ibervirin                                           | C5H9NS2   | 146.0101141 | No  |
| 749 | HMDB0006779; C05579; CHEBI:27406  | Indole-5,6-quinone                                  | C8H5NO2   | 146.0249145 | No  |
| 749 | HMDB0030481                       | Agrocycin                                           | C8H5NO2   | 146.0249145 | No  |
| 749 | HMDB0061933; C11129; CHEBI:27539  | 1H-Indole-2,3-dione                                 | C8H5NO2   | 146.0249145 | No  |
| 750 | HMDB0000148; C00025; CHEBI:16015  | L-Glutamic acid                                     | C5H9NO4   | 146.0458988 | Yes |
| 750 | HMDB0002393; C12269; CHEBI:31882  | N-Methyl-D-aspartic acid                            | C5H9NO4   | 146.0458988 | Yes |
| 750 | HMDB0002931; CHEBI:45441          | N-Acetylserine                                      | C5H9NO4   | 146.0458988 | Yes |
| 750 | HMDB0003011; C00979; CHEBI:17981  | O-Acetylserine                                      | C5H9NO4   | 146.0458988 | Yes |
| 750 | HMDB0003339; C00217; CHEBI:15966  | D-Glutamic acid                                     | C5H9NO4   | 146.0458988 | Yes |
| 750 | HMDB0006556; C05938; CHEBI:27809  | L-4-Hydroxyglutamate semialdehyde                   | C5H9NO4   | 146.0458988 | Yes |
| 750 | HMDB0033550                       | 3-(Carboxymethylamino)propanoic acid                | C5H9NO4   | 146.0458988 | Yes |
| 750 | HMDB0060475; CHEBI:18237          | DL-Glutamate                                        | C5H9NO4   | 146.0458988 | Yes |
| 750 | HMDB0062183                       | N-lactoyl-Glycine                                   | C5H9NO4   | 146.0458988 | Yes |
| 753 | HMDB0005785; CHEBI:24814          | Indole-3-carbinol                                   | C9H9NO    | 146.0617282 | Yes |
| 753 | HMDB0030204                       | 1-(2-Furanylmethyl)-1H-pyrrole                      | C9H9NO    | 146.0617282 | Yes |
| 753 | HMDB0040009                       | 4-(2-Furanylmethylene)-3,4-dihydro-2H-pyrrole       | C9H9NO    | 146.0617282 | Yes |
| 753 | HMDB0040011                       | 3-(2-Furanylmethyl)-1H-pyrrole                      | C9H9NO    | 146.0617282 | Yes |
| 754 | HMDB0029449; CHEBI:435538         | (2R,3R,4R)-2-Amino-4-hydroxy-3-methylpentanoic acid | C6H13NO3  | 146.0824666 | No  |
| 754 | HMDB0033453; C10144; CHEBI:4969   | Fagomine                                            | C6H13NO3  | 146.0824666 | No  |
| 754 | HMDB0061157                       | N-(2-Hydroxyethyl)-morpholine N-oxide               | C6H13NO3  | 146.0824666 | No  |
| 754 | HMDB0142963                       | 2-amino-6-hydroxyhexanoic acid                      | C6H13NO3  | 146.0824666 | No  |
| 764 | HMDB0001553; C01180; CHEBI:33574  | 2-Oxo-4-methylthiobutanoic acid                     | C5H8O3S   | 147.0148177 | No  |
| 766 | HMDB0000426; C00815; CHEBI:15584  | Citramalic acid                                     | C5H8O5    | 147.0300553 | Yes |
| 766 | HMDB0000428                       | 3-Hydroxyglutaric acid                              | C5H8O5    | 147.0300553 | Yes |
| 766 | HMDB0000606; C01087; CHEBI:32796  | D-2-Hydroxyglutaric acid                            | C5H8O5    | 147.0300553 | Yes |
| 766 | HMDB0000694; C03196; CHEBI:32797  | L-2-Hydroxyglutaric acid                            | C5H8O5    | 147.0300553 | Yes |
| 766 | HMDB0001900; C02674; CHEBI:707706 | Ribonolactone                                       | C5H8O5    | 147.0300553 | Yes |
| 766 | HMDB0011676; C02266; CHEBI:15867  | D-Xylono-1,5-lactone                                | C5H8O5    | 147.0300553 | Yes |

|     |                                   |                                                      |          |             |     |
|-----|-----------------------------------|------------------------------------------------------|----------|-------------|-----|
| 766 | HMDB0033912                       | 2-Propenyl propyl disulfide                          | C6H12S2  | 147.0300553 | Yes |
| 766 | HMDB0038890                       | Methyl 3-methyl-1-butenyl disulfide                  | C6H12S2  | 147.0300553 | Yes |
| 766 | HMDB0041392                       | 1-Propenyl propyl disulfide                          | C6H12S2  | 147.0300553 | Yes |
| 766 | HMDB0059655; C02630; CHEBI:17084  | 2-Hydroxyglutarate                                   | C5H8O5   | 147.0300553 | Yes |
| 767 | HMDB0032332; C03124; CHEBI:52794  | Hydroxylated lecithin                                | C4H8N2O4 | 147.0426907 | Yes |
| 769 | HMDB0000227; C00418; CHEBI:25351  | Mevalonic acid                                       | C6H12O4  | 147.0663556 | Yes |
| 769 | HMDB0012140; C06007; CHEBI:27512  | (R) 2,3-Dihydroxy-3-methylvalerate                   | C6H12O4  | 147.0663556 | Yes |
| 769 | HMDB0031639                       | Glycerol 1-propanoate                                | C6H12O4  | 147.0663556 | Yes |
| 769 | HMDB0059629; C00418; CHEBI:17710  | (R)-mevalonate                                       | C6H12O4  | 147.0663556 | Yes |
| 769 | HMDB0059705; CHEBI:67255          | (2-Methoxyethoxy)propanoic acid                      | C6H12O4  | 147.0663556 | Yes |
| 771 | HMDB0059834                       | Pentylbenzene                                        | C11H16   | 147.1179992 | No  |
| 771 | HMDB0061809; CHEBI:88583          | 1-Methyl-4-(1-methylpropyl)-benzene                  | C11H16   | 147.1179992 | No  |
| 771 | HMDB0061810                       | 2,4-Dimethyl-1-(1-methylethyl)-benzene               | C11H16   | 147.1179992 | No  |
| 780 | HMDB0039817                       | Dihydro-4,6-dimethyl-4H-1,3,5-dithiazine             | C5H11NS2 | 148.0261313 | No  |
| 781 | HMDB0004058; C05578; CHEBI:27404  | 5,6-Dihydroxyindole                                  | C8H7NO2  | 148.0404382 | Yes |
| 781 | HMDB0060318; C03742; CHEBI:16660  | (S)-4-Hydroxymandelonitrile                          | C8H7NO2  | 148.0404382 | Yes |
| 781 | HMDB0060946; CHEBI:29132          | NAPQI                                                | C8H7NO2  | 148.0404382 | Yes |
| 783 | HMDB0002099; C08434; CHEBI:28871  | 6-Methyladenine                                      | C6H7N5   | 148.0629223 | No  |
| 783 | HMDB0011599; C02216; CHEBI:201302 | 1-Methyladenine                                      | C6H7N5   | 148.0629223 | No  |
| 783 | HMDB0011600; C00913; CHEBI:38635  | 3-Methyladenine                                      | C6H7N5   | 148.0629223 | No  |
| 783 | HMDB0011614; C02241; CHEBI:201389 | 7-Methyladenine                                      | C6H7N5   | 148.0629223 | No  |
| 785 | HMDB0030175                       | Venoterpine                                          | C9H11NO  | 148.0769454 | No  |
| 785 | HMDB0039662                       | 2,3,6,7-Tetrahydrocyclopent[b]azepin-8(1H)-one       | C9H11NO  | 148.0769454 | No  |
| 785 | HMDB0040016                       | 2-(2-Furanyl)-3,4,5,6-tetrahydropyridine             | C9H11NO  | 148.0769454 | No  |
| 785 | HMDB0040029                       | 2,3-Dihydro-5-methyl-1H-pyrrolizine-7-carboxaldehyde | C9H11NO  | 148.0769454 | No  |
| 785 | HMDB0040043                       | 3-(2-Furanylmethylene)pyrrolidine                    | C9H11NO  | 148.0769454 | No  |
| 785 | HMDB0040047                       | 2,3-Dihydro-6-methyl-1H-pyrrolizine-5-carboxaldehyde | C9H11NO  | 148.0769454 | No  |
| 785 | HMDB0040050                       | 3,4-Dihydro-5-(5-methyl-2-furanyl)-2H-pyrrole        | C9H11NO  | 148.0769454 | No  |
| 785 | HMDB0040051                       | 5-Acetyl-2,3-dihydro-1H-pyrrolizine                  | C9H11NO  | 148.0769454 | No  |
| 787 | HMDB0014337; C07438; CHEBI:8080   | Phentermine                                          | C10H15N  | 148.1131355 | No  |
| 787 | HMDB0015517; CHEBI:6809           | Methamphetamine                                      | C10H15N  | 148.1131355 | No  |
| 787 | HMDB0032243                       | N,N-Dimethylphenethylamine                           | C10H15N  | 148.1131355 | No  |
| 787 | HMDB0032782; C11001               | 2,6-Diethylaniline                                   | C10H15N  | 148.1131355 | No  |
| 787 | HMDB0034886                       | 3-Pentylpyridine                                     | C10H15N  | 148.1131355 | No  |
| 787 | HMDB0034893                       | 2-Pentylpyridine                                     | C10H15N  | 148.1131355 | No  |
| 791 | HMDB0029611; C01892; CHEBI:18091  | Asparagusic acid                                     | C4H6O2S2 | 148.973271  | No  |
| 793 | HMDB0042032; C14872; CHEBI:35012  | Thiodiacetic acid                                    | C4H6O4S  | 148.9911825 | No  |
| 794 | HMDB0029878; C02107; CHEBI:15672  | D-Tartaric acid                                      | C4H6O6   | 149.0094833 | No  |
| 794 | HMDB0038889                       | 2-Methyl-2-(methyldithio)propanal                    | C5H10OS2 | 149.0094833 | No  |
| 794 | HMDB0059916; CHEBI:15674          | 2,3-Dihydroxybutanedioic acid                        | C4H6O6   | 149.0094833 | No  |
| 798 | HMDB0000098; C00181; CHEBI:53455  | D-Xylose                                             | C5H10O5  | 149.0456745 | Yes |
| 798 | HMDB0000283; C00121; CHEBI:16988  | D-Ribose                                             | C5H10O5  | 149.0456745 | Yes |
| 798 | HMDB0000366; CHEBI:86350          | 2-Deoxyribonic acid                                  | C5H10O5  | 149.0456745 | Yes |
| 798 | HMDB0000621; C00309; CHEBI:17173  | D-Ribulose                                           | C5H10O5  | 149.0456745 | Yes |
| 798 | HMDB0000646; C00259; CHEBI:17535  | L-Arabinose                                          | C5H10O5  | 149.0456745 | Yes |
| 798 | HMDB0000751; C00312; CHEBI:17399  | L-Threo-2-pentulose                                  | C5H10O5  | 149.0456745 | Yes |
| 798 | HMDB0001644; C00310; CHEBI:17140  | D-Xylulose                                           | C5H10O5  | 149.0456745 | Yes |
| 798 | HMDB00003371; C00310; CHEBI:16880 | L-Ribulose                                           | C5H10O5  | 149.0456745 | Yes |
| 798 | HMDB0012194; C08353; CHEBI:27476  | Beta-D-ribose                                        | C5H10O5  | 149.0456745 | Yes |
| 798 | HMDB0012325; C06115; CHEBI:6178   | Arabinofuranose                                      | C5H10O5  | 149.0456745 | Yes |
| 798 | HMDB0029578                       | Diisopropyl disulfide                                | C6H14S2  | 149.0456745 | Yes |
| 798 | HMDB0029941; C01488; CHEBI:27672  | D-Apiose                                             | C5H10O5  | 149.0456745 | Yes |
| 798 | HMDB0029942; CHEBI:46983          | D-Arabinose                                          | C5H10O5  | 149.0456745 | Yes |
| 798 | HMDB0031161                       | Methyl pentyl disulfide                              | C6H14S2  | 149.0456745 | Yes |
| 798 | HMDB0031472; C08373; CHEBI:45758  | Dipropyl disulfide                                   | C6H14S2  | 149.0456745 | Yes |
| 798 | HMDB0031709                       | 1,6-Hexanedithiol                                    | C6H14S2  | 149.0456745 | Yes |
| 798 | HMDB0032180                       | Butyl ethyl disulfide                                | C6H14S2  | 149.0456745 | Yes |
| 798 | HMDB0032408                       | Methyl isopentyl disulfide                           | C6H14S2  | 149.0456745 | Yes |
| 798 | HMDB0040056                       | xi-1-(Propylthio)-1-propanethiol                     | C6H14S2  | 149.0456745 | Yes |
| 798 | HMDB0059753; CHEBI:89890          | 2-Deoxypentonic acid                                 | C5H10O5  | 149.0456745 | Yes |
| 798 | HMDB0060254; CHEBI:15936          | Aldehyde-D-xylose                                    | C5H10O5  | 149.0456745 | Yes |

|     |                                  |                                                      |          |             |     |
|-----|----------------------------------|------------------------------------------------------|----------|-------------|-----|
| 798 | HMDB0094694; CHEBI:28272         | beta-Arabinose                                       | C5H10O5  | 149.0456745 | Yes |
| 798 | HMDB0127617                      | 3-hydroxy-2,2-bis(hydroxymethyl)propanoic acid       | C5H10O5  | 149.0456745 | Yes |
| 799 | HMDB0000764; C05629; CHEBI:28631 | Hydrocinnamic acid                                   | C9H10O2  | 149.0604276 | No  |
| 799 | HMDB0002097; CHEBI:262555        | 4-Ethylbenzoic acid                                  | C9H10O2  | 149.0604276 | No  |
| 799 | HMDB0002222; CHEBI:329287        | 3-Methylphenylacetic acid                            | C9H10O2  | 149.0604276 | No  |
| 799 | HMDB0002237; CHEBI:64818         | 3,4-Dimethylbenzoic acid                             | C9H10O2  | 149.0604276 | No  |
| 799 | HMDB0003654; C02646; CHEBI:64555 | 4-Coumaryl alcohol                                   | C9H10O2  | 149.0604276 | No  |
| 799 | HMDB0011743; CHEBI:48526         | 2-Phenylpropionate                                   | C9H10O2  | 149.0604276 | No  |
| 799 | HMDB0013744; C17883; CHEBI:42438 | 2-Methoxy-4-vinylphenol                              | C9H10O2  | 149.0604276 | No  |
| 799 | HMDB0031310; C15513; CHEBI:52051 | Benzyl acetate                                       | C9H10O2  | 149.0604276 | No  |
| 799 | HMDB0032073; CHEBI:389009        | o-Tolyl acetate                                      | C9H10O2  | 149.0604276 | No  |
| 799 | HMDB0032075; C01963              | p-Tolyl acetate                                      | C9H10O2  | 149.0604276 | No  |
| 799 | HMDB0032569                      | 2''-Methoxyacetophenone                              | C9H10O2  | 149.0604276 | No  |
| 799 | HMDB0032570; CHEBI:86567         | 4''-Methoxyacetophenone                              | C9H10O2  | 149.0604276 | No  |
| 799 | HMDB0032592                      | 2''-Hydroxy-5''-methylacetophenone                   | C9H10O2  | 149.0604276 | No  |
| 799 | HMDB0032617                      | Methyl phenylacetate                                 | C9H10O2  | 149.0604276 | No  |
| 799 | HMDB0033967; C01839; CHEBI:32807 | Ethyl benzoate                                       | C9H10O2  | 149.0604276 | No  |
| 799 | HMDB0033970                      | 4-Ethoxybenzaldehyde                                 | C9H10O2  | 149.0604276 | No  |
| 799 | HMDB0037715                      | 1-Phenylethyl formate                                | C9H10O2  | 149.0604276 | No  |
| 799 | HMDB0038355                      | 2-Ethyl-4-(2-furanyl)-2-propenal                     | C9H10O2  | 149.0604276 | No  |
| 799 | HMDB0040428; CHEBI:87417         | 2-Phenylethyl formate                                | C9H10O2  | 149.0604276 | No  |
| 799 | HMDB0040925                      | 2-(2-Furanyl)-3-methyl-2-butenal                     | C9H10O2  | 149.0604276 | No  |
| 799 | HMDB0059824                      | 4-Hydroxy-3-methylacetophenone                       | C9H10O2  | 149.0604276 | No  |
| 799 | HMDB0062349                      | 3''-carboxy-alpha-chromanol                          | C9H10O2  | 149.0604276 | No  |
| 799 | HMDB0125532                      | 3-ethenyl-5-methoxyphenol                            | C9H10O2  | 149.0604276 | No  |
| 799 | HMDB0134026                      | 3-(2-hydroxyphenyl)propanal                          | C9H10O2  | 149.0604276 | No  |
| 799 | HMDB0134027                      | 2-(3-hydroxyprop-1-en-1-yl)phenol                    | C9H10O2  | 149.0604276 | No  |
| 799 | HMDB0135239                      | 4-(prop-2-en-1-yl)benzene-1,2-diol                   | C9H10O2  | 149.0604276 | No  |
| 799 | HMDB0135276                      | 2-hydroxy-3-phenylpropanal                           | C9H10O2  | 149.0604276 | No  |
| 799 | HMDB0135277                      | 3-hydroxy-3-phenylpropanal                           | C9H10O2  | 149.0604276 | No  |
| 799 | HMDB0135278                      | 3-(3-hydroxyphenyl)propanal                          | C9H10O2  | 149.0604276 | No  |
| 799 | HMDB0135279                      | 3-(4-hydroxyphenyl)propanal                          | C9H10O2  | 149.0604276 | No  |
| 799 | HMDB0135280                      | 3-[(1E)-3-hydroxyprop-1-en-1-yl]phenol               | C9H10O2  | 149.0604276 | No  |
| 799 | HMDB0135281                      | (3-phenyloxiran-2-yl)methanol                        | C9H10O2  | 149.0604276 | No  |
| 799 | HMDB0135644                      | 4-(3-hydroxyprop-1-en-1-yl)phenol                    | C9H10O2  | 149.0604276 | No  |
| 800 | HMDB0013704; CHEBI:88954         | 6-Methylnicotinamide                                 | C8H10N2O | 149.0718283 | No  |
| 800 | HMDB0029410                      | 2-Acetyl-3-ethylpyrazine                             | C8H10N2O | 149.0718283 | No  |
| 800 | HMDB0038513                      | 7,8-Dihydro-3-methylpyrrolo[1,2-a]pyrimidin-2(6H)-on | C8H10N2O | 149.0718283 | No  |
| 800 | HMDB0039998                      | 2-Acetyl-3,6-dimethylpyrazine                        | C8H10N2O | 149.0718283 | No  |
| 800 | HMDB0039999                      | 2-Acetyl-3,5-dimethylpyrazine                        | C8H10N2O | 149.0718283 | No  |
| 802 | HMDB0001878; C09908; CHEBI:27607 | Thymol                                               | C10H14O  | 149.0973127 | No  |
| 802 | HMDB0003647; C02576; CHEBI:15421 | Perillyl aldehyde                                    | C10H14O  | 149.0973127 | No  |
| 802 | HMDB0004487; C11383; CHEBI:15399 | (+)-(S)-Carvone                                      | C10H14O  | 149.0973127 | No  |
| 802 | HMDB0029652                      | 2-(4-Methylphenyl)-2-propanol                        | C10H14O  | 149.0973127 | No  |
| 802 | HMDB0031570; CHEBI:37001         | 2-Methyl-1-phenyl-2-propanol                         | C10H14O  | 149.0973127 | No  |
| 802 | HMDB0031613                      | 4-Phenyl-2-butanol                                   | C10H14O  | 149.0973127 | No  |
| 802 | HMDB0031817; C06576              | Cumyl alcohol                                        | C10H14O  | 149.0973127 | No  |
| 802 | HMDB0032063; C14200; CHEBI:34444 | 4-tert-Butylphenol                                   | C10H14O  | 149.0973127 | No  |
| 802 | HMDB0032213                      | 2-trans-4-trans-7-cis-Decatrienal                    | C10H14O  | 149.0973127 | No  |
| 802 | HMDB0032626                      | 1-Methoxy-4-propylbenzene                            | C10H14O  | 149.0973127 | No  |
| 802 | HMDB0033544                      | (2E,4Z,7Z)-2,4,7-Decatrienal                         | C10H14O  | 149.0973127 | No  |
| 802 | HMDB0034846                      | 2-(4-Methylphenyl)-1-propanol                        | C10H14O  | 149.0973127 | No  |
| 802 | HMDB0034921                      | Teresantalal                                         | C10H14O  | 149.0973127 | No  |
| 802 | HMDB0035089; C01767; CHEBI:15400 | (R)-Carvone                                          | C10H14O  | 149.0973127 | No  |
| 802 | HMDB0035172                      | 2,6,6-Trimethyl-1,4-cyclohexadiene-1-carboxaldehyde  | C10H14O  | 149.0973127 | No  |
| 802 | HMDB0035250; C11939              | Myrtenal                                             | C10H14O  | 149.0973127 | No  |
| 802 | HMDB0035591                      | 3-Caren-5-one                                        | C10H14O  | 149.0973127 | No  |
| 802 | HMDB0035761; C09884; CHEBI:28996 | (-)-Pinocarvone                                      | C10H14O  | 149.0973127 | No  |
| 802 | HMDB0035770; C09840; CHEBI:3440  | 5-Isopropyl-2-methylphenol                           | C10H14O  | 149.0973127 | No  |
| 802 | HMDB0035824; CHEBI:38265         | Carvone                                              | C10H14O  | 149.0973127 | No  |
| 802 | HMDB0036061; C17062; CHEBI:53169 | Safranal                                             | C10H14O  | 149.0973127 | No  |

|     |                                   |                                                       |          |             |     |
|-----|-----------------------------------|-------------------------------------------------------|----------|-------------|-----|
| 802 | HMDB0036070                       | 1-Acetyl-4-isopropenylcyclopentene                    | C10H14O  | 149.0973127 | No  |
| 802 | HMDB0036089; C09868; CHEBI:50542  | (R)-Menthofuran                                       | C10H14O  | 149.0973127 | No  |
| 802 | HMDB0036999; C01951; CHEBI:17304  | Piperitenone                                          | C10H14O  | 149.0973127 | No  |
| 802 | HMDB0037561                       | Linden ether                                          | C10H14O  | 149.0973127 | No  |
| 802 | HMDB0038913                       | 4,6-Decadiyn-1-ol                                     | C10H14O  | 149.0973127 | No  |
| 802 | HMDB0061788                       | (S)-2-methyl-5-(1-Methylethenyl)-2-cyclohexen-1-one   | C10H14O  | 149.0973127 | No  |
| 802 | HMDB0133616                       | 2-methyl-3-phenylpropan-1-ol                          | C10H14O  | 149.0973127 | No  |
| 809 | HMDB0034413; CHEBI:167099         | 1,2-Benzisothiazol-3(2H)-one                          | C7H5NOS  | 150.0021229 | No  |
| 809 | HMDB0040578                       | 4-Thiocyanatophenol                                   | C7H5NOS  | 150.0021229 | No  |
| 814 | HMDB0001859; CHEBI:46195          | Acetaminophen                                         | C8H9NO2  | 150.0557935 | No  |
| 814 | HMDB0002210; CHEBI:55484          | 2-Phenylglycine                                       | C8H9NO2  | 150.0557935 | No  |
| 814 | HMDB0012219; CHEBI:74684          | Dopamine quinone                                      | C8H9NO2  | 150.0557935 | No  |
| 814 | HMDB0012992; C17756               | Leukoaminochrome                                      | C8H9NO2  | 150.0557935 | No  |
| 814 | HMDB0029703; CHEBI:1017870        | Methyl 2-aminobenzoate                                | C8H9NO2  | 150.0557935 | No  |
| 814 | HMDB0032609; C03005; CHEBI:16394  | 2-(Methylamino)benzoic acid                           | C8H9NO2  | 150.0557935 | No  |
| 814 | HMDB0033903                       | 3alpha,4,7,7alpha-Tetrahydro-1H-isoindole-1,3(2H)-dic | C8H9NO2  | 150.0557935 | No  |
| 814 | HMDB0059846                       | Ethyl nicotinate                                      | C8H9NO2  | 150.0557935 | No  |
| 814 | HMDB0060680; C16571               | 2-Amino-3-methylbenzoate                              | C8H9NO2  | 150.0557935 | No  |
| 814 | HMDB0061919                       | 2''-Hydroxyacetanilide                                | C8H9NO2  | 150.0557935 | No  |
| 825 | HMDB0015167; CHEBI:2208           | Mercaptopurine                                        | C5H4N4S  | 151.0074132 | Yes |
| 826 | HMDB0000292; C00385; CHEBI:17712  | Xanthine                                              | C5H4N4O2 | 151.0263773 | Yes |
| 826 | HMDB0000786; C07599; CHEBI:28315  | Oxypurinol                                            | C5H4N4O2 | 151.0263773 | Yes |
| 826 | HMDB0001182                       | 6,8-Dihydroxypurine                                   | C5H4N4O2 | 151.0263773 | Yes |
| 827 | HMDB0000020; C00642; CHEBI:18101  | p-Hydroxyphenylacetic acid                            | C8H8O3   | 151.0401438 | Yes |
| 827 | HMDB0000440; C05593; CHEBI:17445  | 3-Hydroxyphenylacetic acid                            | C8H8O3   | 151.0401438 | Yes |
| 827 | HMDB0000669; C05852; CHEBI:28478  | Ortho-Hydroxyphenylacetic acid                        | C8H8O3   | 151.0401438 | Yes |
| 827 | HMDB0000703; C01984; CHEBI:32800  | Mandelic acid                                         | C8H8O3   | 151.0401438 | Yes |
| 827 | HMDB0001101; C02519; CHEBI:40813  | p-Anisic acid                                         | C8H8O3   | 151.0401438 | Yes |
| 827 | HMDB0002390; C14088; CHEBI:20141  | 3-Cresotinic acid                                     | C8H8O3   | 151.0401438 | Yes |
| 827 | HMDB0003791; C04043; CHEBI:27978  | 3,4-Dihydroxyphenylacetaldehyde                       | C8H8O3   | 151.0401438 | Yes |
| 827 | HMDB0004815; CHEBI:85239          | 4-Hydroxy-3-methylbenzoic acid                        | C8H8O3   | 151.0401438 | Yes |
| 827 | HMDB0012308; C00755; CHEBI:18346  | Vanillin                                              | C8H8O3   | 151.0401438 | Yes |
| 827 | HMDB0029657; C13635; CHEBI:35164  | 2,4''-Dihydroxyacetophenone                           | C8H8O3   | 151.0401438 | Yes |
| 827 | HMDB0029658                       | 2'',3''-Dihydroxyacetophenone                         | C8H8O3   | 151.0401438 | Yes |
| 827 | HMDB0029659; C03663; CHEBI:18414  | 2'',4''-Dihydroxyacetophenone                         | C8H8O3   | 151.0401438 | Yes |
| 827 | HMDB0029660; CHEBI:559127         | 2'',6''-Dihydroxyacetophenone                         | C8H8O3   | 151.0401438 | Yes |
| 827 | HMDB0029661; C10675; CHEBI:491876 | 3'',4''-Dihydroxyacetophenone                         | C8H8O3   | 151.0401438 | Yes |
| 827 | HMDB0029662; CHEBI:574890         | 3'',5''-Dihydroxyacetophenone                         | C8H8O3   | 151.0401438 | Yes |
| 827 | HMDB0031609; C02181; CHEBI:8075   | Phenoxyacetic acid                                    | C8H8O3   | 151.0401438 | Yes |
| 827 | HMDB0032399                       | Methyl furfuracrylate                                 | C8H8O3   | 151.0401438 | Yes |
| 827 | HMDB0032572; CHEBI:31835          | Methylparaben                                         | C8H8O3   | 151.0401438 | Yes |
| 827 | HMDB0032594; C10804               | 2-(Hydroxymethyl)benzoic acid                         | C8H8O3   | 151.0401438 | Yes |
| 827 | HMDB0032604; CHEBI:421840         | 2-Methoxybenzoic acid                                 | C8H8O3   | 151.0401438 | Yes |
| 827 | HMDB0032606                       | 3-Methoxybenzoic acid                                 | C8H8O3   | 151.0401438 | Yes |
| 827 | HMDB0032629                       | 2'',5''-Dihydroxyacetophenone                         | C8H8O3   | 151.0401438 | Yes |
| 827 | HMDB0032919                       | Ethyl 2-furanyl diketone                              | C8H8O3   | 151.0401438 | Yes |
| 827 | HMDB0033003                       | 1-(5-Methyl-2-furanyl)-1,2-propanedione               | C8H8O3   | 151.0401438 | Yes |
| 827 | HMDB0034172; C12305; CHEBI:31832  | Methyl 2-hydroxybenzoate                              | C8H8O3   | 151.0401438 | Yes |
| 827 | HMDB0036907                       | 2-Propenyl 2-furancarboxylate                         | C8H8O3   | 151.0401438 | Yes |
| 827 | HMDB0041283                       | 1-(2-Furanyl)-1,3-butanedione                         | C8H8O3   | 151.0401438 | Yes |
| 827 | HMDB0060390; CHEBI:31128          | 4-Hydroxyphenyl acetate                               | C8H8O3   | 151.0401438 | Yes |
| 827 | HMDB0062635; C01983; CHEBI:17656  | (R)-mandelic Acid                                     | C8H8O3   | 151.0401438 | Yes |
| 827 | HMDB0124926                       | 2-hydroxy-2-phenylacetic acid                         | C8H8O3   | 151.0401438 | Yes |
| 827 | HMDB0125528                       | 5-ethenylbenzene-1,2,3-triol                          | C8H8O3   | 151.0401438 | Yes |
| 827 | HMDB0137457                       | 4-[(E)-2-hydroxyethenyl]benzene-1,2-diol              | C8H8O3   | 151.0401438 | Yes |
| 828 | HMDB0004193; C05842; CHEBI:27410  | N1-Methyl-2-pyridone-5-carboxamide                    | C7H8N2O2 | 151.0512271 | Yes |
| 828 | HMDB0004194; C05843; CHEBI:27838  | N1-Methyl-4-pyridone-3-carboxamide                    | C7H8N2O2 | 151.0512271 | Yes |
| 830 | HMDB0032132                       | 2-Isopropyl-1,4-benzenediol                           | C9H12O2  | 151.0764748 | Yes |
| 830 | HMDB0032599                       | 3-(4-Hydroxyphenyl)-1-propanol                        | C9H12O2  | 151.0764748 | Yes |
| 830 | HMDB0036169                       | 3-(5-Methyl-2-furanyl)butanal                         | C9H12O2  | 151.0764748 | Yes |
| 830 | HMDB0036227                       | 2-Propenyl 2,4-hexadienoate                           | C9H12O2  | 151.0764748 | Yes |



|     |                                  |                                            |          |             |     |
|-----|----------------------------------|--------------------------------------------|----------|-------------|-----|
| 830 | HMDB0039801                      | 1-(2-Furanyl)-1-pentanone                  | C9H12O2  | 151.0764748 | Yes |
| 830 | HMDB0039956                      | 4-(Ethoxymethyl)phenol                     | C9H12O2  | 151.0764748 | Yes |
| 830 | HMDB0040175                      | 4-Ethyl-2-methoxyphenol                    | C9H12O2  | 151.0764748 | Yes |
| 830 | HMDB0040216                      | 2,6,6-Trimethyl-2-cyclohexene-1,4-dione    | C9H12O2  | 151.0764748 | Yes |
| 830 | HMDB0040449                      | 2-(Ethoxymethyl)phenol                     | C9H12O2  | 151.0764748 | Yes |
| 830 | HMDB0041326                      | (Dimethoxymethyl)benzene                   | C9H12O2  | 151.0764748 | Yes |
| 830 | HMDB0041804; CHEBI:38547         | 2-Isopropoxyphenol                         | C9H12O2  | 151.0764748 | Yes |
| 830 | HMDB0059853                      | 3,5-Dimethoxytoluene                       | C9H12O2  | 151.0764748 | Yes |
| 830 | HMDB0125537                      | 3-ethyl-5-methoxyphenol                    | C9H12O2  | 151.0764748 | Yes |
| 832 | HMDB0032381                      | 2-Methoxy-(3 or 5 or 6)-isopropylpyrazine  | C8H12N2O | 151.0872666 | No  |
| 832 | HMDB0040052                      | 2-Isopropyl-5-methoxypyrazine              | C8H12N2O | 151.0872666 | No  |
| 832 | HMDB0040053                      | 2-Isopropyl-6-methoxypyrazine              | C8H12N2O | 151.0872666 | No  |
| 832 | HMDB0040340                      | 2-Isopropyl-3-methoxypyrazine              | C8H12N2O | 151.0872666 | No  |
| 833 | HMDB0003450; C00964; CHEBI:15389 | (-)-trans-Carveol                          | C10H16O  | 151.1129193 | No  |
| 833 | HMDB0003634; C02452; CHEBI:15420 | Perillyl alcohol                           | C10H16O  | 151.1129193 | No  |
| 833 | HMDB0003667; C02759; CHEBI:29060 | Alpha-Pinene-oxide                         | C10H16O  | 151.1129193 | No  |
| 833 | HMDB0030892                      | p-Menth-3-en-9-al                          | C10H16O  | 151.1129193 | No  |
| 833 | HMDB0030893                      | Isocitral                                  | C10H16O  | 151.1129193 | No  |
| 833 | HMDB0031854                      | 3-Methyl-5-propyl-2-cyclohexen-1-one       | C10H16O  | 151.1129193 | No  |
| 833 | HMDB0032120                      | 2,6-Dimethyl-1,7-octadien-3-one            | C10H16O  | 151.1129193 | No  |
| 833 | HMDB0032242                      | (E)-3,7-Dimethyl-1,5,7-octatrien-3-ol      | C10H16O  | 151.1129193 | No  |
| 833 | HMDB0032536                      | 2-(trans-2-Pentenyl)cyclopentanone         | C10H16O  | 151.1129193 | No  |
| 833 | HMDB0034715                      | p-Mentha-1(6),8-dien-3-ol                  | C10H16O  | 151.1129193 | No  |
| 833 | HMDB0034916                      | cis-2-Thujen-4-ol                          | C10H16O  | 151.1129193 | No  |
| 833 | HMDB0034973; CHEBI:48697         | (R)-Campholenic aldehyde                   | C10H16O  | 151.1129193 | No  |
| 833 | HMDB0034974                      | (R)-Carvotanacetone                        | C10H16O  | 151.1129193 | No  |
| 833 | HMDB0034975; CHEBI:48933         | Piperitone                                 | C10H16O  | 151.1129193 | No  |
| 833 | HMDB0034985; C09859; CHEBI:4999  | (+)-Fenchone                               | C10H16O  | 151.1129193 | No  |
| 833 | HMDB0035054                      | (1S,4R)-p-Mentha-2,8-dien-1-ol             | C10H16O  | 151.1129193 | No  |
| 833 | HMDB0035077                      | (1R,4R)-p-Mentha-2,8-dien-1-ol             | C10H16O  | 151.1129193 | No  |
| 833 | HMDB0035078; C01499; CHEBI:16980 | Geranial                                   | C10H16O  | 151.1129193 | No  |
| 833 | HMDB0035092; C09847; CHEBI:29020 | cis-Citral                                 | C10H16O  | 151.1129193 | No  |
| 833 | HMDB0035100; C11938              | 2-Pinen-10-ol                              | C10H16O  | 151.1129193 | No  |
| 833 | HMDB0035120                      | Dehydrolinalool                            | C10H16O  | 151.1129193 | No  |
| 833 | HMDB0035125                      | Darwinol                                   | C10H16O  | 151.1129193 | No  |
| 833 | HMDB0035158; C07271; CHEBI:16431 | 1,2-Epoxy-p-menth-8-ene                    | C10H16O  | 151.1129193 | No  |
| 833 | HMDB0035203                      | (S)-9,10-Cyclo-p-menth-1-en-4-ol           | C10H16O  | 151.1129193 | No  |
| 833 | HMDB0035241                      | (Z)-2-Methyl-6-methylene-2,7-octadien-1-ol | C10H16O  | 151.1129193 | No  |
| 833 | HMDB0035277                      | (2S,4R)-p-Mentha-1(7),5-dien-2-ol          | C10H16O  | 151.1129193 | No  |
| 833 | HMDB0035280                      | Teresantalol                               | C10H16O  | 151.1129193 | No  |
| 833 | HMDB0035600                      | (S)-Phellandral                            | C10H16O  | 151.1129193 | No  |
| 833 | HMDB0035604; C09893; CHEBI:26381 | (R)-p-Menth-4(8)-en-3-one                  | C10H16O  | 151.1129193 | No  |
| 833 | HMDB0035622; C11408; CHEBI:232   | (+)-cis-Carveol                            | C10H16O  | 151.1129193 | No  |
| 833 | HMDB0035656                      | 3-Pinanone                                 | C10H16O  | 151.1129193 | No  |
| 833 | HMDB0035706                      | alpha-Cyclocitral                          | C10H16O  | 151.1129193 | No  |
| 833 | HMDB0035737; CHEBI:48934         | (R)-Piperitone                             | C10H16O  | 151.1129193 | No  |
| 833 | HMDB0035738; C09885; CHEBI:41    | (S)-Piperitone                             | C10H16O  | 151.1129193 | No  |
| 833 | HMDB0035741; CHEBI:37046         | (-)-trans-Isopulegone                      | C10H16O  | 151.1129193 | No  |
| 833 | HMDB0035743; C11941; CHEBI:26137 | Pinocarveol                                | C10H16O  | 151.1129193 | No  |
| 833 | HMDB0035744                      | (-)-Isopinocampnone                        | C10H16O  | 151.1129193 | No  |
| 833 | HMDB0036044                      | Marmelo oxide A                            | C10H16O  | 151.1129193 | No  |
| 833 | HMDB0036079; C18018; CHEBI:23733 | Dihydrocarvone                             | C10H16O  | 151.1129193 | No  |
| 833 | HMDB0036080; C11415; CHEBI:168   | (1S,4S)-Dihydrocarvone                     | C10H16O  | 151.1129193 | No  |
| 833 | HMDB0036082; C11395; CHEBI:227   | (-)-cis-Carveol                            | C10H16O  | 151.1129193 | No  |
| 833 | HMDB0036083; CHEBI:23046         | Carveol                                    | C10H16O  | 151.1129193 | No  |
| 833 | HMDB0036085                      | Dehydro-1,8-cineole                        | C10H16O  | 151.1129193 | No  |
| 833 | HMDB0036087                      | (R)-p-Mentha-1,8-dien-7-ol                 | C10H16O  | 151.1129193 | No  |
| 833 | HMDB0036088; C02452; CHEBI:10782 | (S)-p-Mentha-1,8-dien-7-ol                 | C10H16O  | 151.1129193 | No  |
| 833 | HMDB0036113; C20260; CHEBI:50045 | (+)-3-Thujone                              | C10H16O  | 151.1129193 | No  |
| 833 | HMDB0036114; CHEBI:50046         | (-)-3-Thujone                              | C10H16O  | 151.1129193 | No  |
| 833 | HMDB0036115; C09906; CHEBI:9577  | (-)-3-Isothujone                           | C10H16O  | 151.1129193 | No  |

|     |                                  |                                                      |           |             |     |
|-----|----------------------------------|------------------------------------------------------|-----------|-------------|-----|
| 833 | HMDB0036127                      | (-)-Pinocamphone                                     | C10H16O   | 151.1129193 | No  |
| 833 | HMDB0036128                      | (-)-trans-Pinocarveol                                | C10H16O   | 151.1129193 | No  |
| 833 | HMDB0036129                      | Verbenol                                             | C10H16O   | 151.1129193 | No  |
| 833 | HMDB0036598                      | (E,E)-2,4-Decadienal                                 | C10H16O   | 151.1129193 | No  |
| 833 | HMDB0037008                      | 6,8-Epoxy-p-menth-2-ene                              | C10H16O   | 151.1129193 | No  |
| 833 | HMDB0037009                      | Terpinolene oxide                                    | C10H16O   | 151.1129193 | No  |
| 833 | HMDB0037010                      | (2S,4R)-p-Mentha-1(7),8-dien-2-ol                    | C10H16O   | 151.1129193 | No  |
| 833 | HMDB0037015                      | p-Mentha-1,8-dien-4-ol                               | C10H16O   | 151.1129193 | No  |
| 833 | HMDB0037017                      | (R)-p-Mentha-1,8-dien-10-ol                          | C10H16O   | 151.1129193 | No  |
| 833 | HMDB0037024                      | 4-Acetyl-1,4-dimethyl-1-cyclohexene                  | C10H16O   | 151.1129193 | No  |
| 833 | HMDB0037025                      | Hop ether                                            | C10H16O   | 151.1129193 | No  |
| 833 | HMDB0037172                      | Tetrahydro-5-isopropenyl-2-methyl-2-vinylfuran       | C10H16O   | 151.1129193 | No  |
| 833 | HMDB0037280                      | Junionone                                            | C10H16O   | 151.1129193 | No  |
| 833 | HMDB0037302                      | xi-p-Mentha-3,8-dien-1-ol                            | C10H16O   | 151.1129193 | No  |
| 833 | HMDB0037303                      | xi-p-Mentha-1(7),2-dien-4-ol                         | C10H16O   | 151.1129193 | No  |
| 833 | HMDB0038251                      | xi-Pinol                                             | C10H16O   | 151.1129193 | No  |
| 833 | HMDB0038290                      | Photocitral A                                        | C10H16O   | 151.1129193 | No  |
| 833 | HMDB0038557                      | xi-3,6-Dihydro-4-methyl-2-(2-methyl-1-propenyl)-2H-p | C10H16O   | 151.1129193 | No  |
| 833 | HMDB0039008                      | 3,4-Epoxy-p-menth-1(7)-ene                           | C10H16O   | 151.1129193 | No  |
| 833 | HMDB0039816                      | 2-Hexylfuran                                         | C10H16O   | 151.1129193 | No  |
| 833 | HMDB0040766                      | Anethofuran                                          | C10H16O   | 151.1129193 | No  |
| 833 | HMDB0041011; CHEBI:53177         | beta-Cyclocitral                                     | C10H16O   | 151.1129193 | No  |
| 833 | HMDB0041013                      | Isocyclocitral                                       | C10H16O   | 151.1129193 | No  |
| 833 | HMDB0041631; CHEBI:50040         | 3-Thujanone                                          | C10H16O   | 151.1129193 | No  |
| 833 | HMDB0059608; C11409; CHEBI:15388 | (+)-trans-Carveol                                    | C10H16O   | 151.1129193 | No  |
| 833 | HMDB0059761; CHEBI:89872         | 4-(1-Methylethyl)-1-cyclohexene-4-carboxaldehyde     | C10H16O   | 151.1129193 | No  |
| 833 | HMDB0059827                      | 3-Cyclohexene-1-carboxaldehyde, 1,3,4-trimethyl-     | C10H16O   | 151.1129193 | No  |
| 833 | HMDB0059838; CHEBI:15396         | Camphor                                              | C10H16O   | 151.1129193 | No  |
| 833 | HMDB0059875                      | Carvotanacetone                                      | C10H16O   | 151.1129193 | No  |
| 833 | HMDB0059885; CHEBI:87568         | p-Menth-1-en-9-al                                    | C10H16O   | 151.1129193 | No  |
| 833 | HMDB0061794; C09893; CHEBI:35596 | Pulegone                                             | C10H16O   | 151.1129193 | No  |
| 839 | HMDB0003585; C01962; CHEBI:28839 | Thiocysteine                                         | C3H7NO2S2 | 151.9849148 | No  |
| 840 | HMDB0000996; C00606; CHEBI:41721 | 3-Sulfinioalanine                                    | C3H7NO4S  | 152.0009575 | No  |
| 840 | HMDB0060179; C00606; CHEBI:16345 | 3-Sulfinato-L-alaninate                              | C3H7NO4S  | 152.0009575 | No  |
| 843 | HMDB0001476; C00632; CHEBI:15793 | 3-Hydroxyanthranilic acid                            | C7H7NO3   | 152.0353106 | Yes |
| 843 | HMDB0001972; CHEBI:1162549       | 3-Aminosalicylic acid                                | C7H7NO3   | 152.0353106 | Yes |
| 843 | HMDB0014378; C02518; CHEBI:27565 | Aminosalicylic Acid                                  | C7H7NO3   | 152.0353106 | Yes |
| 843 | HMDB0014389; CHEBI:6775          | Mesalazine                                           | C7H7NO3   | 152.0353106 | Yes |
| 843 | HMDB0059749                      | 6-Methoxy-pyridine-3-carboxylic acid                 | C7H7NO3   | 152.0353106 | Yes |
| 843 | HMDB0059811                      | 2-Nitro-p-cresol                                     | C7H7NO3   | 152.0353106 | Yes |
| 848 | HMDB0000073; C03758; CHEBI:18243 | Dopamine                                             | C8H11NO2  | 152.0714674 | No  |
| 848 | HMDB0004825; C04227; CHEBI:44715 | p-Octopamine                                         | C8H11NO2  | 152.0714674 | No  |
| 848 | HMDB0012309; C16666; CHEBI:46958 | Vanillylamine                                        | C8H11NO2  | 152.0714674 | No  |
| 851 | HMDB0034580; C10865              | psi-Pelletierine                                     | C9H15NO   | 152.1080091 | No  |
| 851 | HMDB0037856                      | 2-Methyl-4-pentyloxazole                             | C9H15NO   | 152.1080091 | No  |
| 851 | HMDB0037857                      | 4-Methyl-2-pentyloxazole                             | C9H15NO   | 152.1080091 | No  |
| 851 | HMDB0037862                      | 5-Butyl-2-ethyloxazole                               | C9H15NO   | 152.1080091 | No  |
| 851 | HMDB0037872                      | 2-Ethyl-4-methyl-5-propyloxazole                     | C9H15NO   | 152.1080091 | No  |
| 851 | HMDB0037873                      | 4-Ethyl-2-methyl-5-propyloxazole                     | C9H15NO   | 152.1080091 | No  |
| 851 | HMDB0037874                      | 5-Ethyl-4-methyl-2-(1-methylethyl)oxazole            | C9H15NO   | 152.1080091 | No  |
| 851 | HMDB0037875                      | 2-Butyl-4,5-dimethyloxazole                          | C9H15NO   | 152.1080091 | No  |
| 851 | HMDB0037876                      | 5-Ethyl-2-methyl-4-propyloxazole                     | C9H15NO   | 152.1080091 | No  |
| 851 | HMDB0037878                      | 4-Ethyl-5-methyl-2-(1-methylethyl)oxazole            | C9H15NO   | 152.1080091 | No  |
| 851 | HMDB0037879                      | 4-Butyl-2,5-dimethyloxazole                          | C9H15NO   | 152.1080091 | No  |
| 851 | HMDB0037880                      | 2-Isobutyl-4,5-dimethyloxazole                       | C9H15NO   | 152.1080091 | No  |
| 851 | HMDB0037881                      | 4-Ethyl-5-methyl-2-propyloxazole                     | C9H15NO   | 152.1080091 | No  |
| 851 | HMDB0037882                      | 5-Butyl-2,4-dimethyloxazole                          | C9H15NO   | 152.1080091 | No  |
| 860 | HMDB0041079                      | (E)-S-1-Propenyl thiosulfate                         | C3H6O3S2  | 152.9690593 | No  |
| 861 | HMDB0031871                      | Methyl propyl trisulfide                             | C4H10S3   | 152.9862545 | No  |
| 861 | HMDB0032547                      | 2,4,6-Trithiaheptane                                 | C4H10S3   | 152.9862545 | No  |
| 861 | HMDB0033047                      | Ethyl (methylthio)methyl disulfide                   | C4H10S3   | 152.9862545 | No  |

|     |                                   |                                                       |          |             |     |
|-----|-----------------------------------|-------------------------------------------------------|----------|-------------|-----|
| 861 | HMDB0039524                       | Diethyl trisulfide                                    | C4H10S3  | 152.9862545 | No  |
| 861 | HMDB0040239                       | 1,1''-Thiobisethanethiol                              | C4H10S3  | 152.9862545 | No  |
| 864 | HMDB0062694; CHEBI:57730          | 2-hydroxy-4-nitrophenolate                            | C6H4NO4  | 153.007708  | No  |
| 865 | HMDB0000152; C00628; CHEBI:17189  | Gentisic acid                                         | C7H6O4   | 153.0184507 | Yes |
| 865 | HMDB0000397; C00196; CHEBI:18026  | 2-Pyrocatechuic acid                                  | C7H6O4   | 153.0184507 | Yes |
| 865 | HMDB0001856; C00230; CHEBI:36062  | Protocatechuic acid                                   | C7H6O4   | 153.0184507 | Yes |
| 865 | HMDB0013676; CHEBI:545917         | 2,6-Dihydroxybenzoic acid                             | C7H6O4   | 153.0184507 | Yes |
| 865 | HMDB0013677; CHEBI:258254         | 3,5-Dihydroxybenzoic acid                             | C7H6O4   | 153.0184507 | Yes |
| 865 | HMDB0029666; CHEBI:248101         | 2,4-Dihydroxybenzoic acid                             | C7H6O4   | 153.0184507 | Yes |
| 865 | HMDB0034299; C16748               | Patulin                                               | C7H6O4   | 153.0184507 | Yes |
| 865 | HMDB0125090                       | 2,4,6-trihydroxybenzaldehyde                          | C7H6O4   | 153.0184507 | Yes |
| 866 | HMDB0062719                       | 5-(2-carboxylatoethyl)-4-oxo-4,5-dihydro-1H-imidazol- | C6H6N2O3 | 153.0300544 | Yes |
| 867 | HMDB0032935                       | 1-(2-Thienyl)-1-butanone                              | C8H10O5  | 153.0385939 | No  |
| 867 | HMDB0040231                       | 1-(5-Methyl-2-thienyl)-1-propanone                    | C8H10O5  | 153.0385939 | No  |
| 867 | HMDB0040589                       | 3-Acetyl-2,5-dimethylthiophene                        | C8H10O5  | 153.0385939 | No  |
| 869 | HMDB0005784; CHEBI:68889          | Hydroxytyrosol                                        | C8H10O3  | 153.0557002 | Yes |
| 869 | HMDB0030570                       | Sylvopinol                                            | C8H10O3  | 153.0557002 | Yes |
| 869 | HMDB0032012; C06317; CHEBI:18353  | 4-Hydroxy-3-methoxybenzenemethanol                    | C8H10O3  | 153.0557002 | Yes |
| 869 | HMDB0034158; C10787; CHEBI:955    | 2,6-Dimethoxyphenol                                   | C8H10O3  | 153.0557002 | Yes |
| 869 | HMDB0037724                       | Propyl 2-furoate                                      | C8H10O3  | 153.0557002 | Yes |
| 869 | HMDB0037728                       | 2-Furanylmethyl propanoate                            | C8H10O3  | 153.0557002 | Yes |
| 869 | HMDB0059966                       | 3,5-Dimethoxyphenol                                   | C8H10O3  | 153.0557002 | Yes |
| 869 | HMDB0125534                       | 5-ethylbenzene-1,2,3-triol                            | C8H10O3  | 153.0557002 | Yes |
| 869 | HMDB0126617                       | 2,4-dimethylbenzene-1,3,5-triol                       | C8H10O3  | 153.0557002 | Yes |
| 869 | HMDB0131231                       | 5-methoxy-4-methylbenzene-1,3-diol                    | C8H10O3  | 153.0557002 | Yes |
| 869 | HMDB0131232                       | 5-methoxy-2-methylbenzene-1,3-diol                    | C8H10O3  | 153.0557002 | Yes |
| 869 | HMDB0131479                       | 2,3-dimethoxyphenol                                   | C8H10O3  | 153.0557002 | Yes |
| 869 | HMDB0135785                       | 1-(4-hydroxyphenyl)ethane-1,2-diol                    | C8H10O3  | 153.0557002 | Yes |
| 872 | HMDB0031302                       | Methyl 2-octynoate                                    | C9H14O2  | 153.0920033 | Yes |
| 872 | HMDB0032314                       | 2,4-Hexadienyl propionate                             | C9H14O2  | 153.0920033 | Yes |
| 872 | HMDB0032442                       | 2-Nonenoic acid gamma-lactone                         | C9H14O2  | 153.0920033 | Yes |
| 872 | HMDB0035135                       | (E)-2,6-Dimethyl-2,5-heptadienoic acid                | C9H14O2  | 153.0920033 | Yes |
| 872 | HMDB0036177                       | 3,5,5-Trimethyl-1,2-cyclohexanedione                  | C9H14O2  | 153.0920033 | Yes |
| 872 | HMDB0036239                       | Enol-3,5,5-Trimethyl-1,2-cyclohexanedione             | C9H14O2  | 153.0920033 | Yes |
| 872 | HMDB0037276                       | Octahydro-2H-1-benzopyran-2-one                       | C9H14O2  | 153.0920033 | Yes |
| 872 | HMDB0038268                       | Allyl hexenoate                                       | C9H14O2  | 153.0920033 | Yes |
| 872 | HMDB0038697                       | xi-2,2,6-Trimethyl-1,4-cyclohexanedione               | C9H14O2  | 153.0920033 | Yes |
| 872 | HMDB0040285                       | Anapear                                               | C9H14O2  | 153.0920033 | Yes |
| 872 | HMDB0060285; CHEBI:58972          | 4-Oxo-2-nonenal                                       | C9H14O2  | 153.0920033 | Yes |
| 882 | HMDB0002916; C02235; CHEBI:16318  | 4-Nitrocatechol                                       | C6H5NO4  | 154.0149184 | No  |
| 882 | HMDB0006200                       | 2,4-Dihydroxy-nitrophenol                             | C6H5NO4  | 154.0149184 | No  |
| 884 | HMDB0041484                       | 5-Acetyl-2,4-dimethylthiazole                         | C7H9NOS  | 154.0340684 | No  |
| 888 | HMDB0000177; C00135; CHEBI:15971  | L-Histidine                                           | C6H9N3O2 | 154.0622628 | Yes |
| 888 | HMDB0034267                       | L-2-Amino-3-(1-pyrazolyl)propanoic acid               | C6H9N3O2 | 154.0622628 | Yes |
| 889 | HMDB0030353; C10129; CHEBI:101022 | Arecoline                                             | C8H13NO2 | 154.087434  | No  |
| 898 | HMDB0124940                       | 2-(sulfooxy)acetic acid                               | C2H4O6S  | 154.9655016 | No  |
| 899 | HMDB0000816; C00988; CHEBI:17150  | Phosphoglycolic acid                                  | C2H5O6P  | 154.9752927 | No  |
| 900 | HMDB0041066                       | S-Propyl thiosulfate                                  | C3H8O3S2 | 154.9845729 | No  |
| 902 | HMDB0004812; CHEBI:84212          | 2,5-Furandicarboxylic acid                            | C6H4O5   | 154.9988326 | Yes |
| 902 | HMDB0040939                       | Methyl phenyl disulfide                               | C7H8S2   | 154.9988326 | Yes |
| 904 | HMDB0000226; C00295; CHEBI:16742  | Orotic acid                                           | C5H4N2O4 | 155.0099536 | No  |
| 905 | HMDB0032160                       | 3-(Acetylthio)-2-methylfuran                          | C7H8O2S  | 155.0176539 | No  |
| 905 | HMDB0032334                       | 1-(3-Hydroxy-5-methyl-2-thienyl)ethanone              | C7H8O2S  | 155.0176539 | No  |
| 905 | HMDB0035088                       | Furfuryl thioacetate                                  | C7H8O2S  | 155.0176539 | No  |
| 909 | HMDB0029610                       | Ascladiol                                             | C7H8O4   | 155.0349571 | No  |
| 909 | HMDB0059731; CHEBI:89910          | 2,3-Methyleneglutaric acid                            | C7H8O4   | 155.0349571 | No  |
| 909 | HMDB0125064                       | 4-methoxybenzene-1,2,3-triol                          | C7H8O4   | 155.0349571 | No  |
| 909 | HMDB0125077                       | 2-methoxybenzene-1,3,5-triol                          | C7H8O4   | 155.0349571 | No  |
| 909 | HMDB0140890                       | 6-methoxybenzene-1,2,4-triol                          | C7H8O4   | 155.0349571 | No  |
| 909 | HMDB0140891                       | 5-methoxybenzene-1,2,3-triol                          | C7H8O4   | 155.0349571 | No  |
| 910 | HMDB0000544                       | 5-Hydroxymethyl-4-methyluracil                        | C6H8N2O3 | 155.0463128 | Yes |

|     |                                   |                                                       |           |             |     |
|-----|-----------------------------------|-------------------------------------------------------|-----------|-------------|-----|
| 910 | HMDB0001014; C03680; CHEBI:27384  | 4-Imidazolone-5-propionic acid                        | C6H8N2O3  | 155.0463128 | Yes |
| 910 | HMDB0002320; C05132; CHEBI:27487  | Imidazolelactic acid                                  | C6H8N2O3  | 155.0463128 | Yes |
| 913 | HMDB0031101                       | 8-Hydroxy-5,6-octadienoic acid                        | C8H12O3   | 155.0713638 | Yes |
| 913 | HMDB0032232                       | 2,5-Dimethyl-4-ethoxy-3(2H)-furanone                  | C8H12O3   | 155.0713638 | Yes |
| 915 | HMDB0004362; CHEBI:58968          | 4-Hydroxynonenal                                      | C9H16O2   | 155.1078878 | Yes |
| 915 | HMDB0031263                       | 2,4-Nonanedione                                       | C9H16O2   | 155.1078878 | Yes |
| 915 | HMDB0031271                       | 2-Nonenoic acid                                       | C9H16O2   | 155.1078878 | Yes |
| 915 | HMDB0031514                       | 6-Butyltetrahydro-2H-pyran-2-one                      | C9H16O2   | 155.1078878 | Yes |
| 915 | HMDB0031531                       | Dihydro-5-pentyl-2(3H)-furanone                       | C9H16O2   | 155.1078878 | Yes |
| 915 | HMDB0032265                       | cis-Ethyl 4-heptenoate                                | C9H16O2   | 155.1078878 | Yes |
| 915 | HMDB0032307                       | Hept-trans-2-en-1-yl acetate                          | C9H16O2   | 155.1078878 | Yes |
| 915 | HMDB0032413                       | Methyl 2-octenoate                                    | C9H16O2   | 155.1078878 | Yes |
| 915 | HMDB0032491; CHEBI:206353         | Prenyl isobutyrate                                    | C9H16O2   | 155.1078878 | Yes |
| 915 | HMDB0033167                       | Ethyl cyclohexanecarboxylate                          | C9H16O2   | 155.1078878 | Yes |
| 915 | HMDB0034716                       | 4-Oxononanal                                          | C9H16O2   | 155.1078878 | Yes |
| 915 | HMDB0035307                       | Quercuslactone a                                      | C9H16O2   | 155.1078878 | Yes |
| 915 | HMDB0036208                       | 2-Propenyl 2-ethylbutanoate                           | C9H16O2   | 155.1078878 | Yes |
| 915 | HMDB0036222                       | Cyclohexyl propionate                                 | C9H16O2   | 155.1078878 | Yes |
| 915 | HMDB0037023                       | 2-Hydroxy-2,6,6-trimethylcyclohexanone                | C9H16O2   | 155.1078878 | Yes |
| 915 | HMDB0037496                       | Methyl (E)-2-octenoate                                | C9H16O2   | 155.1078878 | Yes |
| 915 | HMDB0037618                       | (E)-3-Heptenyl acetate                                | C9H16O2   | 155.1078878 | Yes |
| 915 | HMDB0037629                       | Isobutyl angelate                                     | C9H16O2   | 155.1078878 | Yes |
| 915 | HMDB0038272; CHEBI:87682          | 2-Hexenyl propionate                                  | C9H16O2   | 155.1078878 | Yes |
| 915 | HMDB0038275                       | cis-3-Hexenyl propanoate                              | C9H16O2   | 155.1078878 | Yes |
| 915 | HMDB0039736                       | 6-Hydroxy-4,6-dimethyl-3-hepten-2-one                 | C9H16O2   | 155.1078878 | Yes |
| 915 | HMDB0039794                       | Methyl 4Z-octenoate                                   | C9H16O2   | 155.1078878 | Yes |
| 915 | HMDB0040210                       | 2-Propenyl hexanoate                                  | C9H16O2   | 155.1078878 | Yes |
| 915 | HMDB0059728                       | Methyl 3-Octenoate                                    | C9H16O2   | 155.1078878 | Yes |
| 915 | HMDB0059817                       | (Z)-Oak lactone                                       | C9H16O2   | 155.1078878 | Yes |
| 915 | HMDB0059840                       | (E)-2-Ethyl heptenoate                                | C9H16O2   | 155.1078878 | Yes |
| 915 | HMDB0059894                       | (E)-Oak lactone                                       | C9H16O2   | 155.1078878 | Yes |
| 915 | HMDB0060286                       | 3,4-Epoxy-nonanal                                     | C9H16O2   | 155.1078878 | Yes |
| 928 | HMDB0000459; CHEBI:68499          | 3-Methylcrotonylglycine                               | C7H11NO3  | 156.0668001 | Yes |
| 928 | HMDB0000959; CHEBI:73018          | Tiglylglycine                                         | C7H11NO3  | 156.0668001 | Yes |
| 928 | HMDB0014755; C07411; CHEBI:250989 | Paramethadione                                        | C7H11NO3  | 156.0668001 | Yes |
| 928 | HMDB0094701; CHEBI:21560          | N-Acetylproline                                       | C7H11NO3  | 156.0668001 | Yes |
| 931 | HMDB0014447; C12535; CHEBI:48669  | Tranexamic Acid                                       | C8H15NO2  | 156.1031327 | No  |
| 931 | HMDB0033433; C08283               | (S)-Homotachydrine                                    | C8H15NO2  | 156.1031327 | No  |
| 935 | HMDB0041065                       | Dimethyl tetrasulfide                                 | C2H6S4    | 156.926051  | No  |
| 941 | HMDB0031210                       | Zymonic acid                                          | C6H6O5    | 157.0150889 | No  |
| 941 | HMDB0037759; C06035               | 2-Methylene-4-oxopentanedioic acid                    | C6H6O5    | 157.0150889 | No  |
| 941 | HMDB0060348; CHEBI:1184           | 2-Maleylacetate                                       | C6H6O5    | 157.0150889 | No  |
| 941 | HMDB0137818                       | benzene-1,2,3,4,5-pentol                              | C6H6O5    | 157.0150889 | No  |
| 942 | HMDB0000462; C01551; CHEBI:15676  | Allantoin                                             | C4H6N4O3  | 157.0370714 | No  |
| 943 | HMDB0000635; CHEBI:87897          | Succinylacetone                                       | C7H10O4   | 157.050688  | No  |
| 943 | HMDB0012241; C02631; CHEBI:17275  | Isopropylmaleate                                      | C7H10O4   | 157.050688  | No  |
| 943 | HMDB0036380                       | xi-2,3-Dihydro-3,5-dihydroxy-6-methyl-4H-pyran-4-one  | C7H10O4   | 157.050688  | No  |
| 943 | HMDB0059815                       | Ethyl 5-oxotetrahydro-2-furancarboxylate              | C7H10O4   | 157.050688  | No  |
| 945 | HMDB0031670                       | 1-(Hydroxymethyl)-5,5-dimethyl-2,4-imidazolidinedione | C6H10N2O3 | 157.0615015 | No  |
| 946 | HMDB0032861                       | 2-Methoxynaphthalene                                  | C11H10O   | 157.0655256 | No  |
| 946 | HMDB0060303; CHEBI:27615          | (2-Naphthyl)methanol                                  | C11H10O   | 157.0655256 | No  |
| 946 | HMDB0060322                       | 1-Hydroxymethylnaphthalene                            | C11H10O   | 157.0655256 | No  |
| 949 | HMDB0000451; CHEBI:89344          | cis-4-Hydroxycyclohexylacetic acid                    | C8H14O3   | 157.0870153 | No  |
| 949 | HMDB0000909; CHEBI:88508          | trans-4-Hydroxycyclohexylacetic acid                  | C8H14O3   | 157.0870153 | No  |
| 949 | HMDB0010721; CHEBI:44680          | 3-Oxo-octanoic acid                                   | C8H14O3   | 157.0870153 | No  |
| 949 | HMDB0013211                       | Alpha-Keto-octanoic acid                              | C8H14O3   | 157.0870153 | No  |
| 949 | HMDB0030303                       | 6-Ethyl-1-methyl-2,7,8-trioxabicyclo[3.2.1]octane     | C8H14O3   | 157.0870153 | No  |
| 949 | HMDB0031177                       | Tetrahydrofurfuryl propionate                         | C8H14O3   | 157.0870153 | No  |
| 949 | HMDB0031307; C02975; CHEBI:18119  | Ethyl 3-oxohexanoate                                  | C8H14O3   | 157.0870153 | No  |
| 949 | HMDB0036230                       | 1-Methyl-2-oxopropyl butyrate                         | C8H14O3   | 157.0870153 | No  |
| 949 | HMDB0036395                       | 2-Methylpropyl 3-oxobutanoate                         | C8H14O3   | 157.0870153 | No  |

|     |                                   |                                                      |          |             |     |
|-----|-----------------------------------|------------------------------------------------------|----------|-------------|-----|
| 949 | HMDB0038305                       | 3-Methylbutyl 2-oxopropanoate                        | C8H14O3  | 157.0870153 | No  |
| 949 | HMDB0040447                       | Butyl acetoacetate                                   | C8H14O3  | 157.0870153 | No  |
| 949 | HMDB0041616                       | Propyl levulinate                                    | C8H14O3  | 157.0870153 | No  |
| 949 | HMDB0059938                       | 5-Butyl-1,4-dioxan-2-one                             | C8H14O3  | 157.0870153 | No  |
| 949 | HMDB0059939                       | 6-Butyl-1,4-dioxan-2-one                             | C8H14O3  | 157.0870153 | No  |
| 949 | HMDB0060683; C16655               | 2-n-Propyl-4-oxopentanoic acid                       | C8H14O3  | 157.0870153 | No  |
| 949 | HMDB0060685; C16652; CHEBI:80638  | 3-Oxovalproic acid                                   | C8H14O3  | 157.0870153 | No  |
| 949 | HMDB0062788; CHEBI:84261          | Isobutyric Acid Anhydride                            | C8H14O3  | 157.0870153 | No  |
| 950 | HMDB0032178; C19575; CHEBI:53405  | Butadiene-styrene rubber                             | C12H14   | 157.1018603 | No  |
| 951 | HMDB0000798; CHEBI:86618          | Oenanthic ether                                      | C9H18O2  | 157.1234425 | No  |
| 951 | HMDB0000847; C01601; CHEBI:29019  | Pelargonic acid                                      | C9H18O2  | 157.1234425 | No  |
| 951 | HMDB0030331                       | xi-2-Ethylheptanoic acid                             | C9H18O2  | 157.1234425 | No  |
| 951 | HMDB0031291; CHEBI:87432          | Methyl caprylate                                     | C9H18O2  | 157.1234425 | No  |
| 951 | HMDB0031480                       | Heptyl acetate                                       | C9H18O2  | 157.1234425 | No  |
| 951 | HMDB0031557                       | 4-Methyloctanoic acid                                | C9H18O2  | 157.1234425 | No  |
| 951 | HMDB0032042                       | Butyl 3-methylbutanoate                              | C9H18O2  | 157.1234425 | No  |
| 951 | HMDB0032309                       | 3-Heptyl acetate                                     | C9H18O2  | 157.1234425 | No  |
| 951 | HMDB0032406                       | 5-Methylhexyl acetate                                | C9H18O2  | 157.1234425 | No  |
| 951 | HMDB0032454                       | 3-Octyl formate                                      | C9H18O2  | 157.1234425 | No  |
| 951 | HMDB0034162                       | Pentyl butanoate                                     | C9H18O2  | 157.1234425 | No  |
| 951 | HMDB0034165; CHEBI:87365          | Propyl hexanoate                                     | C9H18O2  | 157.1234425 | No  |
| 951 | HMDB0034606; CHEBI:87549          | Hexyl propionate                                     | C9H18O2  | 157.1234425 | No  |
| 951 | HMDB0036234; CHEBI:87537          | 3-Methylbutyl 2-methylpropanoate                     | C9H18O2  | 157.1234425 | No  |
| 951 | HMDB0037143                       | 1-Hydroxy-3-nonanone                                 | C9H18O2  | 157.1234425 | No  |
| 951 | HMDB0037164                       | 3-(Hydroxymethyl)-2-octanone                         | C9H18O2  | 157.1234425 | No  |
| 951 | HMDB0037288                       | 4-Methyl-2-pentyl-1,3-dioxolane                      | C9H18O2  | 157.1234425 | No  |
| 951 | HMDB0038040                       | 2-Methylpropyl 3-methylbutanoate                     | C9H18O2  | 157.1234425 | No  |
| 951 | HMDB0038603; CHEBI:87496          | Octyl formate                                        | C9H18O2  | 157.1234425 | No  |
| 951 | HMDB0039216                       | Butyl 2-methylbutanoate                              | C9H18O2  | 157.1234425 | No  |
| 951 | HMDB0039219                       | 1-Methylbutyl butanoate                              | C9H18O2  | 157.1234425 | No  |
| 951 | HMDB0040221; CHEBI:87422          | Isoamyl butyrate                                     | C9H18O2  | 157.1234425 | No  |
| 951 | HMDB0040295                       | Butyl pentanoate                                     | C9H18O2  | 157.1234425 | No  |
| 951 | HMDB0040430                       | Isopropyl hexanoate                                  | C9H18O2  | 157.1234425 | No  |
| 951 | HMDB0059822                       | Ethyl 5-methylhexanoate                              | C9H18O2  | 157.1234425 | No  |
| 965 | HMDB0029433; C00651; CHEBI:48029  | L-2-Amino-4-methylenepentanedioic acid               | C6H9NO4  | 158.0460434 | Yes |
| 965 | HMDB0034442                       | L-trans-alpha-Amino-2-carboxycyclopropaneacetic acid | C6H9NO4  | 158.0460434 | Yes |
| 970 | HMDB0000339; CHEBI:240943         | 2-Methylbutyrylglycine                               | C7H13NO3 | 158.0824781 | Yes |
| 970 | HMDB0000678; CHEBI:70984          | Isovaleryl glycine                                   | C7H13NO3 | 158.0824781 | Yes |
| 970 | HMDB0000927                       | Valeryl glycine                                      | C7H13NO3 | 158.0824781 | Yes |
| 970 | HMDB0011757                       | N-Acetylvaline                                       | C7H13NO3 | 158.0824781 | Yes |
| 970 | HMDB0012154; C02636; CHEBI:57885  | 3-Dehydrocarnitine                                   | C7H13NO3 | 158.0824781 | Yes |
| 970 | HMDB0012175; C03087               | 5-Acetamidovalerate                                  | C7H13NO3 | 158.0824781 | Yes |
| 970 | HMDB0029230                       | 4-Hydroxystachydrine                                 | C7H13NO3 | 158.0824781 | Yes |
| 970 | HMDB0029409; CHEBI:85534          | Turicine                                             | C7H13NO3 | 158.0824781 | Yes |
| 970 | HMDB0029412; C08269               | Betonicine                                           | C7H13NO3 | 158.0824781 | Yes |
| 970 | HMDB0031345                       | Calystegine A6                                       | C7H13NO3 | 158.0824781 | Yes |
| 970 | HMDB0036384                       | Calystegine A7                                       | C7H13NO3 | 158.0824781 | Yes |
| 970 | HMDB0038593                       | Calystegin A3                                        | C7H13NO3 | 158.0824781 | Yes |
| 970 | HMDB0038625                       | Medicanine                                           | C7H13NO3 | 158.0824781 | Yes |
| 970 | HMDB0061678; CHEBI:70830          | Methyl 5-(hydroxymethyl)pyrrolidine-3-carboxylate    | C7H13NO3 | 158.0824781 | Yes |
| 972 | HMDB0000991; CHEBI:75145          | DL-2-Aminooctanoic acid                              | C8H17NO2 | 158.1187401 | No  |
| 972 | HMDB0014375; CHEBI:64356          | Pregabalin                                           | C8H17NO2 | 158.1187401 | No  |
| 981 | HMDB0035901                       | Thiacremonone                                        | C6H8O3S  | 159.0117358 | No  |
| 983 | HMDB0000225; C00322; CHEBI:15753  | Oxadipic acid                                        | C6H8O5   | 159.0304985 | Yes |
| 983 | HMDB0000398; C00846; CHEBI:37440  | 3-Oxadipic acid                                      | C6H8O5   | 159.0304985 | Yes |
| 983 | HMDB0039447                       | 2-Methyl-4-oxopentanedioic acid                      | C6H8O5   | 159.0304985 | Yes |
| 983 | HMDB0059737; CHEBI:17325          | 3-Methyl-3-hydroxypentanedioate                      | C6H8O5   | 159.0304985 | Yes |
| 984 | HMDB0030412; C08298; CHEBI:529821 | Tricholomic acid                                     | C5H8N2O4 | 159.0414001 | No  |
| 984 | HMDB0042037; CHEBI:29128          | Thymine glycol                                       | C5H8N2O4 | 159.0414001 | No  |
| 985 | HMDB0032394; CHEBI:563586         | 6-Methylcoumarin                                     | C10H8O2  | 159.0453046 | No  |
| 985 | HMDB0036073                       | Viburtinal                                           | C10H8O2  | 159.0453046 | No  |

|      |                                  |                                                      |           |             |     |
|------|----------------------------------|------------------------------------------------------|-----------|-------------|-----|
| 985  | HMDB0041009                      | 7-Methyl-2-benzofurancarboxaldehyde                  | C10H8O2   | 159.0453046 | No  |
| 985  | HMDB0060497; CHEBI:17435         | Naphthalene-1,2-diol                                 | C10H8O2   | 159.0453046 | No  |
| 986  | HMDB0000555                      | 3-Methyladipic acid                                  | C7H12O4   | 159.0662726 | Yes |
| 986  | HMDB0000857; C02656; CHEBI:30531 | Pimelic acid                                         | C7H12O4   | 159.0662726 | Yes |
| 986  | HMDB0002441; CHEBI:1129201       | 3,3-Dimethylglutaric acid                            | C7H12O4   | 159.0662726 | Yes |
| 986  | HMDB0029167                      | 2-Methyladipic acid                                  | C7H12O4   | 159.0662726 | Yes |
| 986  | HMDB0029573; CHEBI:391281        | Diethyl malonate                                     | C7H12O4   | 159.0662726 | Yes |
| 986  | HMDB0041605                      | Propyleneglycol diacetate                            | C7H12O4   | 159.0662726 | Yes |
| 986  | HMDB0059722; CHEBI:70855         | Mono-methyl-adipate                                  | C7H12O4   | 159.0662726 | Yes |
| 986  | HMDB0059738                      | 2-Ethylglutaric acid                                 | C7H12O4   | 159.0662726 | Yes |
| 986  | HMDB0059893                      | Ethyl methyl_succinate                               | C7H12O4   | 159.0662726 | Yes |
| 986  | HMDB0061676; CHEBI:68459         | 2,2-Dimethylglutaric acid                            | C7H12O4   | 159.0662726 | Yes |
| 987  | HMDB0031572; CHEBI:87335         | 2-Methyl-4-propyl-1,3-oxathiane                      | C8H16O5   | 159.0850371 | No  |
| 987  | HMDB0032426                      | (+/-)-3-(Methylthio)heptanal                         | C8H16O5   | 159.0850371 | No  |
| 988  | HMDB0000486                      | 7-Hydroxyoctanoic acid                               | C8H16O3   | 159.1027358 | No  |
| 988  | HMDB0000711; CHEBI:86543         | Hydroxyoctanoic acid                                 | C8H16O3   | 159.1027358 | No  |
| 988  | HMDB0001954; CHEBI:37098         | 3-Hydroxyoctanoic acid                               | C8H16O3   | 159.1027358 | No  |
| 988  | HMDB0002264                      | (R)-2-Hydroxycaprylic acid                           | C8H16O3   | 159.1027358 | No  |
| 988  | HMDB0010722; CHEBI:37099         | (R)-3-Hydroxyoctanoic acid                           | C8H16O3   | 159.1027358 | No  |
| 988  | HMDB0013898; C16650              | 5-Hydroxyvalproic acid                               | C8H16O3   | 159.1027358 | No  |
| 988  | HMDB0013899; C16651              | 3-Hydroxyvalproic acid                               | C8H16O3   | 159.1027358 | No  |
| 988  | HMDB0013900; C16649              | 4-Hydroxyvalproic acid                               | C8H16O3   | 159.1027358 | No  |
| 988  | HMDB0031509; CHEBI:23997         | Ethyl (±)-3-hydroxyhexanoate                         | C8H16O3   | 159.1027358 | No  |
| 988  | HMDB0032270                      | (+/-)-Ethyl 2-hydroxy-3-methylvalerate               | C8H16O3   | 159.1027358 | No  |
| 988  | HMDB0032827                      | Peroxyoctanoic acid                                  | C8H16O3   | 159.1027358 | No  |
| 988  | HMDB0059825; CHEBI:87534         | Isoamyl lactate                                      | C8H16O3   | 159.1027358 | No  |
| 988  | HMDB0059867                      | Ethyl 2-hydroxy-4-methylpentanoate                   | C8H16O3   | 159.1027358 | No  |
| 988  | HMDB0062596; CHEBI:78949         | (7R)-7-hydroxyoctanoic Acid                          | C8H16O3   | 159.1027358 | No  |
| 989  | HMDB0002038; C02728; CHEBI:17604 | N(6)-Methyllysine                                    | C7H16N2O2 | 159.1140004 | Yes |
| 989  | HMDB0006009                      | Isoputrescine                                        | C7H16N2O2 | 159.1140004 | Yes |
| 990  | HMDB0061813                      | 1-(1-Methylethenyl)-4-(1-methylethyl)benzene         | C12H16    | 159.118041  | No  |
| 990  | HMDB0061814                      | 1-(1-methylethenyl)-3-(1-methylethyl)-benzene        | C12H16    | 159.118041  | No  |
| 998  | HMDB0002273; C03079; CHEBI:16338 | 4-Hydroxy-L-glutamic acid                            | C5H7NO5   | 160.0258281 | No  |
| 998  | HMDB0002467                      | A-Ketoglutaric acid oxime                            | C5H7NO5   | 160.0258281 | No  |
| 998  | HMDB0033764                      | Erucin                                               | C6H11NS2  | 160.0258281 | No  |
| 998  | HMDB0038446                      | 1-Thiocyanato-4-(methylthio)butane                   | C6H11NS2  | 160.0258281 | No  |
| 998  | HMDB0060495; C01044; CHEBI:48429 | N-Formyl-L-aspartate                                 | C5H7NO5   | 160.0258281 | No  |
| 999  | HMDB0002285; CHEBI:130363        | 2-Indolecarboxylic acid                              | C9H7NO2   | 160.0402492 | Yes |
| 999  | HMDB0003320; C19837; CHEBI:24809 | Indole-3-carboxylic acid                             | C9H7NO2   | 160.0402492 | Yes |
| 999  | HMDB0004077; C05639; CHEBI:28799 | 4,6-Dihydroxyquinoline                               | C9H7NO2   | 160.0402492 | Yes |
| 999  | HMDB0031172; CHEBI:563251        | 3-Formyl-6-hydroxyindole                             | C9H7NO2   | 160.0402492 | Yes |
| 999  | HMDB0060289; CHEBI:28883         | Quinoline-4,8-diol                                   | C9H7NO2   | 160.0402492 | Yes |
| 1000 | HMDB0000510; C00956; CHEBI:37024 | Aminoadipic acid                                     | C6H11NO4  | 160.061571  | Yes |
| 1000 | HMDB0029423; CHEBI:7671          | Acetylhomoserine                                     | C6H11NO4  | 160.061571  | Yes |
| 1000 | HMDB0033747; C03210; CHEBI:857   | (±)-2,2"-Iminobispropanoic acid                      | C6H11NO4  | 160.061571  | Yes |
| 1000 | HMDB0061715                      | Glutamate, gamma-methyl ester                        | C6H11NO4  | 160.061571  | Yes |
| 1000 | HMDB0062557; CHEBI:45826         | N-Acetylthreonine                                    | C6H11NO4  | 160.061571  | Yes |
| 1000 | HMDB0062660; C01046; CHEBI:16440 | N-methyl-L-glutamic Acid                             | C6H11NO4  | 160.061571  | Yes |
| 1000 | HMDB0094716                      | hydroxybutyrylglycine                                | C6H11NO4  | 160.061571  | Yes |
| 1001 | HMDB0003447; C00955; CHEBI:17890 | Tryptophanol                                         | C10H11NO  | 160.0767608 | Yes |
| 1001 | HMDB0030267; C09915; CHEBI:3157  | (R)-Boschniakine                                     | C10H11NO  | 160.0767608 | Yes |
| 1001 | HMDB0040028; CHEBI:134433        | 1-(2,3-Dihydro-1H-pyrrolizin-5-yl)-2-propen-1-one    | C10H11NO  | 160.0767608 | Yes |
| 1001 | HMDB0040042; CHEBI:134432        | 3-[(5-Methyl-2-furanyl)methyl]-1H-pyrrole            | C10H11NO  | 160.0767608 | Yes |
| 1001 | HMDB0040048; CHEBI:134434        | 3,4-Dihydro-4-[(5-methyl-2-furanyl)methylene]-2H-pyr | C10H11NO  | 160.0767608 | Yes |
| 1003 | HMDB0000062; C00318; CHEBI:11060 | L-Carnitine                                          | C7H15NO3  | 160.0979234 | No  |
| 1003 | HMDB0062496; CHEBI:17126         | Malonyl-Carnitin                                     | C7H15NO3  | 160.0979234 | No  |
| 1005 | HMDB0006078; CHEBI:89478         | Putrescine                                           | C7H17N2O2 | 160.1212858 | No  |
| 1005 | HMDB0015154; C06850; CHEBI:3084  | Bethanechol                                          | C7H17N2O2 | 160.1212858 | No  |
| 1018 | HMDB0012134; C15606; CHEBI:49252 | 1,2-Dihydroxy-3-keto-5-methylthiopentene             | C6H10O3S  | 161.0290006 | Yes |
| 1018 | HMDB0036204                      | 1-(Methylsulfanyl)-1-oxopropan-2-yl acetate          | C6H10O3S  | 161.0290006 | Yes |
| 1019 | HMDB0000321; C02360; CHEBI:17023 | 2-Hydroxyadipic acid                                 | C6H10O5   | 161.0456518 | Yes |

|      |                                  |                                              |           |             |     |
|------|----------------------------------|----------------------------------------------|-----------|-------------|-----|
| 1019 | HMDB0000345                      | 3-Hydroxyadipic acid                         | C6H10O5   | 161.0456518 | Yes |
| 1019 | HMDB0000355; C03761; CHEBI:16831 | 3-Hydroxymethylglutaric acid                 | C6H10O5   | 161.0456518 | Yes |
| 1019 | HMDB0000368; CHEBI:55541         | 2(R)-Hydroxyadipic acid                      | C6H10O5   | 161.0456518 | Yes |
| 1019 | HMDB0000640; CHEBI:30997         | Levogluconan                                 | C6H10O5   | 161.0456518 | Yes |
| 1019 | HMDB0029934                      | D-1-Deoxy-erythro-hexo-2,3-diulose           | C6H10O5   | 161.0456518 | Yes |
| 1019 | HMDB0032873; C11592; CHEBI:59051 | Diethyl dicarbonate                          | C6H10O5   | 161.0456518 | Yes |
| 1019 | HMDB0034426                      | (-)-1-Methylpropyl 1-propenyl disulfide      | C7H14S2   | 161.0456518 | Yes |
| 1019 | HMDB0041561                      | D-1,5-Anhydrofructose                        | C6H10O5   | 161.0456518 | Yes |
| 1019 | HMDB0059758; C02488              | 2-Hydroxy-2-ethylsuccinic acid               | C6H10O5   | 161.0456518 | Yes |
| 1020 | HMDB0029714                      | 4,5-Dihydro-1-benzoxepin-3(2H)-one           | C10H10O2  | 161.0592347 | Yes |
| 1020 | HMDB0032611; C10475              | 3-(4-Methoxyphenyl)-2-propenal               | C10H10O2  | 161.0592347 | Yes |
| 1020 | HMDB0033591; C10490              | Safrole                                      | C10H10O2  | 161.0592347 | Yes |
| 1020 | HMDB0033830                      | Cassiastearoptene                            | C10H10O2  | 161.0592347 | Yes |
| 1020 | HMDB0033833                      | Methyl cinnamate                             | C10H10O2  | 161.0592347 | Yes |
| 1020 | HMDB0038893                      | 3,6-Dimethyl-2(3H)-benzofuranone             | C10H10O2  | 161.0592347 | Yes |
| 1020 | HMDB0040577                      | Cinnamyl formate                             | C10H10O2  | 161.0592347 | Yes |
| 1020 | HMDB0040592                      | Allyl benzoate                               | C10H10O2  | 161.0592347 | Yes |
| 1020 | HMDB0060335; CHEBI:28516         | 1,2-Dihydronaphthalene-1,2-diol              | C10H10O2  | 161.0592347 | Yes |
| 1020 | HMDB0133504                      | 4-(3-hydroxyphenyl)but-3-en-2-one            | C10H10O2  | 161.0592347 | Yes |
| 1020 | HMDB0133594                      | (2E)-2-methyl-3-phenylprop-2-enoic acid      | C10H10O2  | 161.0592347 | Yes |
| 1020 | HMDB0133595                      | (2Z)-2-(hydroxymethyl)-3-phenylprop-2-enal   | C10H10O2  | 161.0592347 | Yes |
| 1020 | HMDB0133596                      | (2Z)-3-(3-hydroxyphenyl)-2-methylprop-2-enal | C10H10O2  | 161.0592347 | Yes |
| 1020 | HMDB0133597                      | (2Z)-3-(4-hydroxyphenyl)-2-methylprop-2-enal | C10H10O2  | 161.0592347 | Yes |
| 1020 | HMDB0133598                      | 2-methyl-3-phenyloxirane-2-carbaldehyde      | C10H10O2  | 161.0592347 | Yes |
| 1020 | HMDB0133599                      | (2Z)-3-(2-hydroxyphenyl)-2-methylprop-2-enal | C10H10O2  | 161.0592347 | Yes |
| 1020 | HMDB0133747                      | (3E)-1-hydroxy-4-phenylbut-3-en-2-one        | C10H10O2  | 161.0592347 | Yes |
| 1020 | HMDB0133748                      | (3E)-4-(3-hydroxyphenyl)but-3-en-2-one       | C10H10O2  | 161.0592347 | Yes |
| 1020 | HMDB0133749                      | (3E)-4-(4-hydroxyphenyl)but-3-en-2-one       | C10H10O2  | 161.0592347 | Yes |
| 1020 | HMDB0133750                      | 1-(3-phenyloxiran-2-yl)ethan-1-one           | C10H10O2  | 161.0592347 | Yes |
| 1020 | HMDB0133751                      | (3E)-4-(2-hydroxyphenyl)but-3-en-2-one       | C10H10O2  | 161.0592347 | Yes |
| 1020 | HMDB0133752                      | (3Z)-3-hydroxy-4-phenylbut-3-en-2-one        | C10H10O2  | 161.0592347 | Yes |
| 1020 | HMDB0133755                      | 1-phenylbutane-2,3-dione                     | C10H10O2  | 161.0592347 | Yes |
| 1020 | HMDB0135643                      | 3-(4-methoxyphenyl)prop-2-enal               | C10H10O2  | 161.0592347 | Yes |
| 1020 | HMDB0141046                      | 4-(4-hydroxyphenyl)but-3-en-2-one            | C10H10O2  | 161.0592347 | Yes |
| 1020 | HMDB0141158                      | 1-hydroxy-4-phenylbut-3-en-2-one             | C10H10O2  | 161.0592347 | Yes |
| 1021 | HMDB0001297; CHEBI:89406         | Norcotinine                                  | C9H10N2O  | 161.0717116 | No  |
| 1022 | HMDB0059918                      | 2-(1-Ethoxyethoxy)propanoic acid             | C7H14O4   | 161.0818906 | Yes |
| 1023 | HMDB0000450; C16741; CHEBI:18040 | 5-Hydroxylysine                              | C6H14N2O3 | 161.0932471 | No  |
| 1024 | HMDB0001934; C00745; CHEBI:17688 | L(-)-Nicotine                                | C10H14N2  | 161.1079084 | No  |
| 1024 | HMDB0004350; C06180; CHEBI:28986 | Anabasine                                    | C10H14N2  | 161.1079084 | No  |
| 1024 | HMDB0014330; C16150; CHEBI:18723 | Nicotine                                     | C10H14N2  | 161.1079084 | No  |
| 1024 | HMDB0039982                      | Trimethyl-2-propenylpyrazine                 | C10H14N2  | 161.1079084 | No  |
| 1026 | HMDB0013806                      | 1,3-Diisopropylbenzene                       | C12H18    | 161.1336889 | No  |
| 1026 | HMDB0036759                      | Pregeijerene                                 | C12H18    | 161.1336889 | No  |
| 1026 | HMDB0061815                      | Hexylbenzene                                 | C12H18    | 161.1336889 | No  |
| 1034 | HMDB0033585; CHEBI:83501         | Acesulfame                                   | C4H5NO4S  | 161.9867454 | No  |
| 1036 | HMDB0001890; C06809; CHEBI:28939 | Acetylcysteine                               | C5H9NO3S  | 162.0239964 | Yes |
| 1037 | HMDB0038445; CHEBI:351346        | 1-Isothiocyanato-2-phenylethane              | C9H9NS    | 162.0359729 | No  |
| 1037 | HMDB0040034                      | 2-Ethylbenzothiazole                         | C9H9NS    | 162.0359729 | No  |
| 1039 | HMDB0001424                      | 4-(3-Pyridyl)-3-butenic acid                 | C9H9NO2   | 162.0560012 | Yes |
| 1039 | HMDB0004186; C05834; CHEBI:28254 | 3-Methyldioxyindole                          | C9H9NO2   | 162.0560012 | Yes |
| 1039 | HMDB0062406; C19567; CHEBI:66879 | 4-Oxo-1-(3-pyridyl)-1-butanone               | C9H9NO2   | 162.0560012 | Yes |
| 1042 | HMDB0011727; CHEBI:39066         | Bicine                                       | C6H13NO4  | 162.0763519 | No  |
| 1042 | HMDB0032862                      | 2-Amino-4-ethoxy-3-hydroxybutanoic acid      | C6H13NO4  | 162.0763519 | No  |
| 1042 | HMDB0035359; C16843              | 1-Deoxynojirimycin                           | C6H13NO4  | 162.0763519 | No  |
| 1057 | HMDB0000205; C00166; CHEBI:30851 | Phenylpyruvic acid                           | C9H8O3    | 163.0399119 | No  |
| 1057 | HMDB0001713; C12621; CHEBI:32357 | m-Coumaric acid                              | C9H8O3    | 163.0399119 | No  |
| 1057 | HMDB0002035; C00811; CHEBI:32374 | 4-Hydroxycinnamic acid                       | C9H8O3    | 163.0399119 | No  |
| 1057 | HMDB0002641; C01772; CHEBI:18125 | 2-Hydroxycinnamic acid                       | C9H8O3    | 163.0399119 | No  |
| 1057 | HMDB0012225; C02763; CHEBI:16815 | Enol-phenylpyruvate                          | C9H8O3    | 163.0399119 | No  |
| 1057 | HMDB0030677; C06738; CHEBI:17450 | cis-p-Coumaric acid                          | C9H8O3    | 163.0399119 | No  |

|      |                                  |                                           |          |             |     |
|------|----------------------------------|-------------------------------------------|----------|-------------|-----|
| 1057 | HMDB0041592; C05838; CHEBI:28873 | Coumaric acid                             | C9H8O3   | 163.0399119 | No  |
| 1057 | HMDB0062605; CHEBI:84256         | Methyl Phenylglyoxalate                   | C9H8O3   | 163.0399119 | No  |
| 1057 | HMDB0125104                      | 3-(3-hydroxyphenyl)prop-2-enoic acid      | C9H8O3   | 163.0399119 | No  |
| 1057 | HMDB0126545                      | 3-phenyloxirane-2-carboxylic acid         | C9H8O3   | 163.0399119 | No  |
| 1057 | HMDB0128076                      | 3-(4-hydroxyphenyl)prop-2-enoic acid      | C9H8O3   | 163.0399119 | No  |
| 1057 | HMDB0129375                      | 4-methoxy-1-benzofuran-6-ol               | C9H8O3   | 163.0399119 | No  |
| 1057 | HMDB0134028                      | 3-(2-hydroxyphenyl)prop-2-enoic acid      | C9H8O3   | 163.0399119 | No  |
| 1057 | HMDB0134029                      | 3-(2,3-dihydroxyphenyl)prop-2-enal        | C9H8O3   | 163.0399119 | No  |
| 1057 | HMDB0134030                      | 3-(2,5-dihydroxyphenyl)prop-2-enal        | C9H8O3   | 163.0399119 | No  |
| 1057 | HMDB0134031                      | 3-(2-hydroxyphenyl)oxirane-2-carbaldehyde | C9H8O3   | 163.0399119 | No  |
| 1057 | HMDB0141767                      | (2E)-3-(3,4-dihydroxyphenyl)prop-2-enal   | C9H8O3   | 163.0399119 | No  |
| 1057 | HMDB0141768                      | 3-(4-hydroxyphenyl)oxirane-2-carbaldehyde | C9H8O3   | 163.0399119 | No  |
| 1059 | HMDB0000174; C01019; CHEBI:2181  | L-Fucose                                  | C6H12O5  | 163.0612871 | Yes |
| 1059 | HMDB0000849; C00507; CHEBI:62346 | Rhamnose                                  | C6H12O5  | 163.0612871 | Yes |
| 1059 | HMDB0002712; C07326; CHEBI:16070 | 1,5-Anhydrosorbitol                       | C6H12O5  | 163.0612871 | Yes |
| 1059 | HMDB0003081; C02095; CHEBI:27442 | Beta-D-Fucose                             | C6H12O5  | 163.0612871 | Yes |
| 1059 | HMDB0005876                      | 3-Deoxyfructose                           | C6H12O5  | 163.0612871 | Yes |
| 1059 | HMDB0010207; C00861; CHEBI:17897 | L-Rhamnulose                              | C6H12O5  | 163.0612871 | Yes |
| 1059 | HMDB0012327; C02781              | 2-Deoxygalactopyranose                    | C6H12O5  | 163.0612871 | Yes |
| 1059 | HMDB0029196; C01018; CHEBI:42564 | D-Fucose                                  | C6H12O5  | 163.0612871 | Yes |
| 1059 | HMDB0033050                      | Butyl isopropyl disulfide                 | C7H16S2  | 163.0612871 | Yes |
| 1059 | HMDB0033051                      | Butyl propyl disulfide                    | C7H16S2  | 163.0612871 | Yes |
| 1059 | HMDB0033821                      | 2-O-Methyl-D-xylose                       | C6H12O5  | 163.0612871 | Yes |
| 1059 | HMDB0039783                      | 1-(Methylthio)-1-hexanethiol              | C7H16S2  | 163.0612871 | Yes |
| 1059 | HMDB0059624; CHEBI:42548         | Alpha-L-fucose                            | C6H12O5  | 163.0612871 | Yes |
| 1059 | HMDB0059625; CHEBI:42589         | beta-L-fucose                             | C6H12O5  | 163.0612871 | Yes |
| 1059 | HMDB0060267; C01721; CHEBI:17617 | L-Fuculose                                | C6H12O5  | 163.0612871 | Yes |
| 1059 | HMDB0062477                      | 2-Deoxyglucose                            | C6H12O5  | 163.0612871 | Yes |
| 1059 | HMDB0062489; CHEBI:48204         | L-Fucose-1P                               | C6H12O5  | 163.0612871 | Yes |
| 1059 | HMDB0124735                      | 6-methyloxane-2,3,4,5-tetrol              | C6H12O5  | 163.0612871 | Yes |
| 1060 | HMDB0000543; CHEBI:41500         | Benzenebutanoic acid                      | C10H12O2 | 163.0766013 | No  |
| 1060 | HMDB0001955                      | 3-Phenylbutyric acid                      | C10H12O2 | 163.0766013 | No  |
| 1060 | HMDB0005802; C10469; CHEBI:50545 | Isoeugenol                                | C10H12O2 | 163.0766013 | No  |
| 1060 | HMDB0005809; C10453; CHEBI:4917  | Eugenol                                   | C10H12O2 | 163.0766013 | No  |
| 1060 | HMDB0030060                      | Methyl 3-phenylpropanoate                 | C10H12O2 | 163.0766013 | No  |
| 1060 | HMDB0030063                      | Benzyl propionate                         | C10H12O2 | 163.0766013 | No  |
| 1060 | HMDB0031761                      | Propyl benzoate                           | C10H12O2 | 163.0766013 | No  |
| 1060 | HMDB0032038                      | Isopropyl benzoate                        | C10H12O2 | 163.0766013 | No  |
| 1060 | HMDB0032336                      | 3-Hydroxy-4-phenylbutan-2-one             | C10H12O2 | 163.0766013 | No  |
| 1060 | HMDB0032586                      | 3-(4-Methoxyphenyl)-2-propen-1-ol         | C10H12O2 | 163.0766013 | No  |
| 1060 | HMDB0032618                      | Ethyl phenylacetate                       | C10H12O2 | 163.0766013 | No  |
| 1060 | HMDB0032620                      | 1-Phenylethyl acetate                     | C10H12O2 | 163.0766013 | No  |
| 1060 | HMDB0032891                      | 1-(4-Methoxyphenyl)-2-propanone           | C10H12O2 | 163.0766013 | No  |
| 1060 | HMDB0033723; CHEBI:68656         | 4-(4-Hydroxyphenyl)-2-butanone            | C10H12O2 | 163.0766013 | No  |
| 1060 | HMDB0033945; C12303; CHEBI:31988 | 2-Phenylethyl acetate                     | C10H12O2 | 163.0766013 | No  |
| 1060 | HMDB0034471                      | 3-Phenylpropyl formate                    | C10H12O2 | 163.0766013 | No  |
| 1060 | HMDB0034615                      | Epoxyanethole                             | C10H12O2 | 163.0766013 | No  |
| 1060 | HMDB0034732                      | Thymoquinone                              | C10H12O2 | 163.0766013 | No  |
| 1060 | HMDB0035213; C09904; CHEBI:10447 | beta-Thujaplicin                          | C10H12O2 | 163.0766013 | No  |
| 1060 | HMDB0035268; C06578; CHEBI:28122 | 4-Isopropylbenzoic acid                   | C10H12O2 | 163.0766013 | No  |
| 1060 | HMDB0035414                      | Lepalone                                  | C10H12O2 | 163.0766013 | No  |
| 1060 | HMDB0036098                      | Isoegomaketone                            | C10H12O2 | 163.0766013 | No  |
| 1060 | HMDB0037160                      | 4-Methyl-2-phenyl-1,3-dioxolane           | C10H12O2 | 163.0766013 | No  |
| 1060 | HMDB0037174                      | p-Mentha-2,4(8)-dien-9,3-olide            | C10H12O2 | 163.0766013 | No  |
| 1060 | HMDB0038184                      | Egomaketone                               | C10H12O2 | 163.0766013 | No  |
| 1060 | HMDB0040359                      | 1,2-Dimethoxy-4-vinylbenzene              | C10H12O2 | 163.0766013 | No  |
| 1060 | HMDB0040460                      | 4-Methylbenzyl alcohol acetate            | C10H12O2 | 163.0766013 | No  |
| 1060 | HMDB0041472; C07213              | 2-Methylbenzyl alcohol acetate            | C10H12O2 | 163.0766013 | No  |
| 1060 | HMDB0041473; C07216              | (3-Methylphenyl)methyl acetate            | C10H12O2 | 163.0766013 | No  |
| 1060 | HMDB0041612                      | Phenyl butyrate                           | C10H12O2 | 163.0766013 | No  |
| 1060 | HMDB0127494                      | 1-ethenyl-3,5-dimethoxybenzene            | C10H12O2 | 163.0766013 | No  |



|      |                                   |                                                 |          |             |     |
|------|-----------------------------------|-------------------------------------------------|----------|-------------|-----|
| 1060 | HMDB0133507                       | 4-(3-hydroxyphenyl)butan-2-one                  | C10H12O2 | 163.0766013 | No  |
| 1060 | HMDB0133600                       | 2-hydroxy-2-methyl-3-phenylpropanal             | C10H12O2 | 163.0766013 | No  |
| 1060 | HMDB0133601                       | 2-benzyl-3-hydroxypropanal                      | C10H12O2 | 163.0766013 | No  |
| 1060 | HMDB0133603                       | 3-hydroxy-2-methyl-3-phenylpropanal             | C10H12O2 | 163.0766013 | No  |
| 1060 | HMDB0133604                       | 3-(3-hydroxyphenyl)-2-methylpropanal            | C10H12O2 | 163.0766013 | No  |
| 1060 | HMDB0133605                       | 3-(4-hydroxyphenyl)-2-methylpropanal            | C10H12O2 | 163.0766013 | No  |
| 1060 | HMDB0133606                       | 2-(phenylmethylidene)propane-1,3-diol           | C10H12O2 | 163.0766013 | No  |
| 1060 | HMDB0133607                       | 3-[(1E)-3-hydroxy-2-methylprop-1-en-1-yl]phenol | C10H12O2 | 163.0766013 | No  |
| 1060 | HMDB0133608                       | 4-[(1E)-3-hydroxy-2-methylprop-1-en-1-yl]phenol | C10H12O2 | 163.0766013 | No  |
| 1060 | HMDB0133609                       | (2-methyl-3-phenyloxiran-2-yl)methanol          | C10H12O2 | 163.0766013 | No  |
| 1060 | HMDB0133610                       | 2-[(1E)-3-hydroxy-2-methylprop-1-en-1-yl]phenol | C10H12O2 | 163.0766013 | No  |
| 1060 | HMDB0133617                       | 2-methyl-3-phenylpropanoic acid                 | C10H12O2 | 163.0766013 | No  |
| 1060 | HMDB0133725                       | (3E)-4-phenylbut-3-ene-1,2-diol                 | C10H12O2 | 163.0766013 | No  |
| 1060 | HMDB0133727                       | 3-[(1E)-3-hydroxybut-1-en-1-yl]phenol           | C10H12O2 | 163.0766013 | No  |
| 1060 | HMDB0133729                       | 1-(3-phenyloxiran-2-yl)ethan-1-ol               | C10H12O2 | 163.0766013 | No  |
| 1060 | HMDB0133753                       | 1-hydroxy-4-phenylbutan-2-one                   | C10H12O2 | 163.0766013 | No  |
| 1060 | HMDB0133754                       | 4-hydroxy-4-phenylbutan-2-one                   | C10H12O2 | 163.0766013 | No  |
| 1060 | HMDB0135737                       | 3-(4-methoxyphenyl)propanal                     | C10H12O2 | 163.0766013 | No  |
| 1060 | HMDB0135738                       | 3-(4-methoxyphenyl)prop-2-en-1-ol               | C10H12O2 | 163.0766013 | No  |
| 1061 | HMDB0012246; CHEBI:130677         | Kynuramine                                      | C9H12N2O | 163.0873513 | No  |
| 1061 | HMDB0034900                       | 2-(1,2-Diamino-1-propenyl)phenol                | C9H12N2O | 163.0873513 | No  |
| 1062 | HMDB0062666; CHEBI:84233          | Triethylene Glycol Monomethyl Ether             | C7H16O4  | 163.0969515 | No  |
| 1063 | HMDB0029653                       | 1-(1-Methoxy-1-methylethyl)-4-methylbenzene     | C11H16O  | 163.1129607 | No  |
| 1063 | HMDB0031311                       | Benzyl butyl ether                              | C11H16O  | 163.1129607 | No  |
| 1063 | HMDB0031454; CHEBI:88585          | trans-Jasmone                                   | C11H16O  | 163.1129607 | No  |
| 1063 | HMDB0031624                       | 5-Phenyl-1-pentanol                             | C11H16O  | 163.1129607 | No  |
| 1063 | HMDB0031625                       | 1-Phenyl-2-pentanol                             | C11H16O  | 163.1129607 | No  |
| 1063 | HMDB0031866                       | 2-Methyl-4-phenyl-2-butanol                     | C11H16O  | 163.1129607 | No  |
| 1063 | HMDB0032060                       | 2-Butyl-4-methylphenol                          | C11H16O  | 163.1129607 | No  |
| 1063 | HMDB0035601; C08490               | (Z)-3-Methyl-2-(2-pentenyl)-2-cyclopenten-1-one | C11H16O  | 163.1129607 | No  |
| 1063 | HMDB0035989                       | Thymol methyl ether                             | C11H16O  | 163.1129607 | No  |
| 1063 | HMDB0036719                       | Norbicycloekasantalal                           | C11H16O  | 163.1129607 | No  |
| 1063 | HMDB0036814                       | Santalone                                       | C11H16O  | 163.1129607 | No  |
| 1063 | HMDB0036816                       | Norecasantalal                                  | C11H16O  | 163.1129607 | No  |
| 1063 | HMDB0037294                       | 2-Methyl-3-(2-pentenyl)-2-cyclopenten-1-one     | C11H16O  | 163.1129607 | No  |
| 1074 | HMDB0041820; C20155; CHEBI:44605  | 8-Oxoguanine                                    | C5H3N5O2 | 164.0216373 | Yes |
| 1075 | HMDB0003454; C00971; CHEBI:16871  | 4-Pyridoxolactone                               | C8H7NO3  | 164.0354879 | Yes |
| 1075 | HMDB0004089; C05653; CHEBI:36575  | Formylanthranilic acid                          | C8H7NO3  | 164.0354879 | Yes |
| 1075 | HMDB0004291; C06052; CHEBI:2124   | 5-Pyridoxolactone                               | C8H7NO3  | 164.0354879 | Yes |
| 1075 | HMDB0013030                       | Noradrenochrome                                 | C8H7NO3  | 164.0354879 | Yes |
| 1075 | HMDB0036582                       | 6-Methoxy-2(3H)-benzoxazolone                   | C8H7NO3  | 164.0354879 | Yes |
| 1075 | HMDB0038318; C15769; CHEBI:63559  | (R)-2-Hydroxy-2H-1,4-benzoxazin-3(4H)-one       | C8H7NO3  | 164.0354879 | Yes |
| 1077 | HMDB0000897; C02242; CHEBI:28664  | 7-Methylguanine                                 | C6H7N5O  | 164.0577897 | Yes |
| 1077 | HMDB0001566; C02230; CHEBI:27564  | 3-Methylguanine                                 | C6H7N5O  | 164.0577897 | Yes |
| 1077 | HMDB0003282; C04152; CHEBI:21803  | 1-Methylguanine                                 | C6H7N5O  | 164.0577897 | Yes |
| 1077 | HMDB0006040; C04153               | N2-Methylguanine                                | C6H7N5O  | 164.0577897 | Yes |
| 1079 | HMDB0000159; C00079; CHEBI:17295  | L-Phenylalanine                                 | C9H11NO2 | 164.0716265 | Yes |
| 1079 | HMDB0001007                       | 3-Pyridinebutanoic acid                         | C9H11NO2 | 164.0716265 | Yes |
| 1079 | HMDB0004992; C07527; CHEBI:116735 | Benzocaine                                      | C9H11NO2 | 164.0716265 | Yes |
| 1079 | HMDB0006044; CHEBI:110006         | Norsalsolinol                                   | C9H11NO2 | 164.0716265 | Yes |
| 1079 | HMDB0033485                       | Gentiatibetine                                  | C9H11NO2 | 164.0716265 | Yes |
| 1079 | HMDB0033589                       | Ethyl 2-aminobenzoate                           | C9H11NO2 | 164.0716265 | Yes |
| 1079 | HMDB0034169                       | Methyl N-methylantranilate                      | C9H11NO2 | 164.0716265 | Yes |
| 1079 | HMDB0059934                       | Benzyl glycinate                                | C9H11NO2 | 164.0716265 | Yes |
| 1079 | HMDB0062402; C19565               | 4-Hydroxy-1-(3-pyridinyl)-1-butanone            | C9H11NO2 | 164.0716265 | Yes |
| 1079 | HMDB0062407; C19578; CHEBI:82572  | 5-(3-Pyridyl)-2-hydroxytetrahydrofuran          | C9H11NO2 | 164.0716265 | Yes |
| 1080 | HMDB0001943; C02765; CHEBI:51209  | Pseudoephedrine                                 | C10H15NO | 164.1080703 | No  |
| 1080 | HMDB0004366; C06199; CHEBI:5764   | Hordenine                                       | C10H15NO | 164.1080703 | No  |
| 1080 | HMDB0015451; C01575; CHEBI:15407  | Ephedrine                                       | C10H15NO | 164.1080703 | No  |
| 1080 | HMDB0035652                       | Perilla sugar                                   | C10H15NO | 164.1080703 | No  |
| 1080 | HMDB0038597                       | Nepetalactam                                    | C10H15NO | 164.1080703 | No  |

|      |                                  |                                                       |          |             |     |
|------|----------------------------------|-------------------------------------------------------|----------|-------------|-----|
| 1080 | HMDB0039665                      | 5-Ethyl-1,2,3,4,5,6-hexahydro-7H-cyclopenta[b]pyridin | C10H15NO | 164.1080703 | No  |
| 1080 | HMDB0039666                      | 6-Ethyl-1,2,3,4,5,6-hexahydro-7H-cyclopenta[b]pyridin | C10H15NO | 164.1080703 | No  |
| 1080 | HMDB0039678                      | 3-Methyl-2-(1-pyrrolidinyl)-2-cyclopenten-1-one       | C10H15NO | 164.1080703 | No  |
| 1080 | HMDB0039679                      | 5-Methyl-2-(1-pyrrolidinyl)-2-cyclopenten-1-one       | C10H15NO | 164.1080703 | No  |
| 1080 | HMDB0039682                      | 2,3,4,5,6,7-Hexahydro-7-methylcyclopent[b]azepin-8(1  | C10H15NO | 164.1080703 | No  |
| 1080 | HMDB0039836                      | 2-(5-Methyl-2-furanyl)piperidine                      | C10H15NO | 164.1080703 | No  |
| 1080 | HMDB0040049                      | 1-[(5-Methyl-2-furanyl)methyl]pyrrolidine             | C10H15NO | 164.1080703 | No  |
| 1080 | HMDB0060767                      | 4-Hydroxymethamphetamine                              | C10H15NO | 164.1080703 | No  |
| 1092 | HMDB0002107; C01606; CHEBI:29069 | Phthalic acid                                         | C8H6O4   | 165.0196468 | No  |
| 1092 | HMDB0002334                      | Benzoquinoneacetic acid                               | C8H6O4   | 165.0196468 | No  |
| 1092 | HMDB0002428; C06337; CHEBI:15702 | Terephthalic acid                                     | C8H6O4   | 165.0196468 | No  |
| 1092 | HMDB0032613                      | 3,4-Methylenedioxybenzoic acid                        | C8H6O4   | 165.0196468 | No  |
| 1093 | HMDB0060412; C16614; CHEBI:28279 | 6-Methylmercaptopurine                                | C6H6N4S  | 165.0244019 | No  |
| 1093 | HMDB0136691                      | [(3-methylbut-2-en-1-yl)oxy]sulfonic acid             | C5H10O4S | 165.0244019 | No  |
| 1094 | HMDB0001886; C16357; CHEBI:62207 | 3-Methylxanthine                                      | C6H6N4O2 | 165.041798  | Yes |
| 1094 | HMDB0001991; C16353; CHEBI:48991 | 7-Methylxanthine                                      | C6H6N4O2 | 165.041798  | Yes |
| 1094 | HMDB0010738; CHEBI:336244        | 1-Methylxanthine                                      | C6H6N4O2 | 165.041798  | Yes |
| 1094 | HMDB0034394; CHEBI:91021         | S-Propyl 1-propanesulfinothioate                      | C6H14OS2 | 165.041798  | Yes |
| 1094 | HMDB0059716; CHEBI:287361        | 9-Methylxanthine                                      | C6H6N4O2 | 165.041798  | Yes |
| 1095 | HMDB0000375; C11457; CHEBI:1427  | 3-(3-Hydroxyphenyl)propanoic acid                     | C9H10O3  | 165.0555638 | No  |
| 1095 | HMDB0000563; C05607; CHEBI:8100  | D-Phenyllactic acid                                   | C9H10O3  | 165.0555638 | No  |
| 1095 | HMDB0000748; C05607; CHEBI:32978 | L-3-Phenyllactic acid                                 | C9H10O3  | 165.0555638 | No  |
| 1095 | HMDB0000779; C01479; CHEBI:25998 | Phenyllactic acid                                     | C9H10O3  | 165.0555638 | No  |
| 1095 | HMDB0002072; CHEBI:55501         | 4-Methoxyphenylacetic acid                            | C9H10O3  | 165.0555638 | No  |
| 1095 | HMDB0002199; C01744; CHEBI:32980 | Desaminotyrosine                                      | C9H10O3  | 165.0555638 | No  |
| 1095 | HMDB0002229                      | 3-Phenoxypropionic acid                               | C9H10O3  | 165.0555638 | No  |
| 1095 | HMDB0005175; C05581; CHEBI:28111 | Homovanillin                                          | C9H10O3  | 165.0555638 | No  |
| 1095 | HMDB0029665; CHEBI:48408         | Ethyl vanillin                                        | C9H10O3  | 165.0555638 | No  |
| 1095 | HMDB0029817                      | Ethyl salicylate                                      | C9H10O3  | 165.0555638 | No  |
| 1095 | HMDB0031132                      | 3,4-Dihydroxyphenylacetone                            | C9H10O3  | 165.0555638 | No  |
| 1095 | HMDB0032030                      | Guaicyl acetate                                       | C9H10O3  | 165.0555638 | No  |
| 1095 | HMDB0032138; C02201; CHEBI:17098 | 3,4-Dimethoxybenzaldehyde                             | C9H10O3  | 165.0555638 | No  |
| 1095 | HMDB0032573; CHEBI:31575         | Ethylparaben                                          | C9H10O3  | 165.0555638 | No  |
| 1095 | HMDB0032605                      | Methyl 2-methoxybenzoate                              | C9H10O3  | 165.0555638 | No  |
| 1095 | HMDB0032639; CHEBI:86903         | Methyl 4-methoxybenzoate                              | C9H10O3  | 165.0555638 | No  |
| 1095 | HMDB0033752; C01198; CHEBI:16104 | 3-(2-Hydroxyphenyl)propanoic acid                     | C9H10O3  | 165.0555638 | No  |
| 1095 | HMDB0034243                      | Ipomeanine                                            | C9H10O3  | 165.0555638 | No  |
| 1095 | HMDB0034993                      | 4-Methoxybenzyl formate                               | C9H10O3  | 165.0555638 | No  |
| 1095 | HMDB0040645                      | 3-Hydroxy-1-(4-hydroxyphenyl)-1-propanone             | C9H10O3  | 165.0555638 | No  |
| 1095 | HMDB0041611                      | Ethyl 2-furanacrylate                                 | C9H10O3  | 165.0555638 | No  |
| 1095 | HMDB0041683; C03080              | 4-Hydroxyphenyl-2-propionic acid                      | C9H10O3  | 165.0555638 | No  |
| 1095 | HMDB0059969                      | 3-Methoxyphenylacetic acid                            | C9H10O3  | 165.0555638 | No  |
| 1095 | HMDB0062348                      | 3,5-Dimethoxybenzaldehyde                             | C9H10O3  | 165.0555638 | No  |
| 1095 | HMDB0062590; C01456; CHEBI:30765 | Tropate                                               | C9H10O3  | 165.0555638 | No  |
| 1095 | HMDB0124925                      | 3-hydroxy-3-phenylpropanoic acid                      | C9H10O3  | 165.0555638 | No  |
| 1095 | HMDB0125519                      | 4-ethenyl-6-methoxybenzene-1,3-diol                   | C9H10O3  | 165.0555638 | No  |
| 1095 | HMDB0125525                      | 5-ethenyl-3-methoxybenzene-1,2-diol                   | C9H10O3  | 165.0555638 | No  |
| 1095 | HMDB0125539                      | 4-ethenyl-2-methoxybenzene-1,3-diol                   | C9H10O3  | 165.0555638 | No  |
| 1095 | HMDB0134032                      | 3-(2,3-dihydroxyphenyl)propanal                       | C9H10O3  | 165.0555638 | No  |
| 1095 | HMDB0134033                      | 3-(2,5-dihydroxyphenyl)propanal                       | C9H10O3  | 165.0555638 | No  |
| 1095 | HMDB0134034                      | 2-hydroxy-3-(2-hydroxyphenyl)propanal                 | C9H10O3  | 165.0555638 | No  |
| 1095 | HMDB0134035                      | 3-hydroxy-3-(2-hydroxyphenyl)propanal                 | C9H10O3  | 165.0555638 | No  |
| 1095 | HMDB0134036                      | 3-(3-hydroxyprop-1-en-1-yl)benzene-1,2-diol           | C9H10O3  | 165.0555638 | No  |
| 1095 | HMDB0134037                      | 2-[3-(hydroxymethyl)oxiran-2-yl]phenol                | C9H10O3  | 165.0555638 | No  |
| 1095 | HMDB0134038                      | 2-(3-hydroxyprop-1-en-1-yl)benzene-1,4-diol           | C9H10O3  | 165.0555638 | No  |
| 1095 | HMDB0137472                      | 4-[(E)-2-hydroxyethenyl]-2-methoxyphenol              | C9H10O3  | 165.0555638 | No  |
| 1095 | HMDB0141765                      | 4-[(1E)-3-hydroxyprop-1-en-1-yl]benzene-1,2-diol      | C9H10O3  | 165.0555638 | No  |
| 1095 | HMDB0141766                      | 4-[3-(hydroxymethyl)oxiran-2-yl]phenol                | C9H10O3  | 165.0555638 | No  |
| 1095 | HMDB0142136                      | 2-(2-hydroxyphenyl)propanoic acid                     | C9H10O3  | 165.0555638 | No  |
| 1095 | HMDB0142137                      | 2-hydroxy-2-phenylpropanoic acid                      | C9H10O3  | 165.0555638 | No  |
| 1097 | HMDB0034294                      | 1,3,11-Tridecatiene-5,7,9-triyne                      | C13H10   | 165.0703778 | Yes |

|      |                                   |                                                      |          |             |     |
|------|-----------------------------------|------------------------------------------------------|----------|-------------|-----|
| 1097 | HMDB0039104                       | (3E,5Z)-1,3,5-Tridecatriene-7,9,11-triyne            | C13H10   | 165.0703778 | Yes |
| 1098 | HMDB0038183                       | 3-(4-Methyl-3-pentenyl)thiophene                     | C10H14S  | 165.0745258 | Yes |
| 1099 | HMDB0004586; C11924; CHEBI:36999  | Perillic acid                                        | C10H14O2 | 165.0921939 | Yes |
| 1099 | HMDB0029691                       | Wine lactone                                         | C10H14O2 | 165.0921939 | Yes |
| 1099 | HMDB0031085; CHEBI:66729          | 6-Pentyl-2H-pyran-2-one                              | C10H14O2 | 165.0921939 | Yes |
| 1099 | HMDB0032062; CHEBI:78886          | 2-tert-Butyl-1,4-benzenediol                         | C10H14O2 | 165.0921939 | Yes |
| 1099 | HMDB0032135                       | 2-Methoxy-4-propylphenol                             | C10H14O2 | 165.0921939 | Yes |
| 1099 | HMDB0032462; C02088; CHEBI:9642   | Pentyl 2-furyl ketone                                | C10H14O2 | 165.0921939 | Yes |
| 1099 | HMDB0032615                       | 1,1-Dimethoxy-2-phenylethane                         | C10H14O2 | 165.0921939 | Yes |
| 1099 | HMDB0034922                       | alpha-Teresantalic acid                              | C10H14O2 | 165.0921939 | Yes |
| 1099 | HMDB0035063                       | Epinepetalactone                                     | C10H14O2 | 165.0921939 | Yes |
| 1099 | HMDB0035235                       | 2,4,7-Decatrienoic acid                              | C10H14O2 | 165.0921939 | Yes |
| 1099 | HMDB0035328                       | Perilla ketone                                       | C10H14O2 | 165.0921939 | Yes |
| 1099 | HMDB0036042                       | Marmelolactone A                                     | C10H14O2 | 165.0921939 | Yes |
| 1099 | HMDB0036084                       | Isomintlactone                                       | C10H14O2 | 165.0921939 | Yes |
| 1099 | HMDB0036878                       | 1,4-Epidioxy-p-mentha-2,8-diene                      | C10H14O2 | 165.0921939 | Yes |
| 1099 | HMDB0036879                       | 1,2:3,4-Diepoxy-p-menth-8-ene                        | C10H14O2 | 165.0921939 | Yes |
| 1099 | HMDB0037011                       | 5-Hydroxy-p-mentha-6,8-dien-2-one                    | C10H14O2 | 165.0921939 | Yes |
| 1099 | HMDB0037012                       | 2-Hydroxy-p-mentha-1,8-dien-6-one                    | C10H14O2 | 165.0921939 | Yes |
| 1099 | HMDB0037044                       | Rotundifolone                                        | C10H14O2 | 165.0921939 | Yes |
| 1099 | HMDB0039382                       | (1xi,4xi,6xi)-Carvone oxide                          | C10H14O2 | 165.0921939 | Yes |
| 1099 | HMDB0040176                       | 4-Ethyl-1,2-dimethoxybenzene                         | C10H14O2 | 165.0921939 | Yes |
| 1099 | HMDB0041000                       | Karahana lactone                                     | C10H14O2 | 165.0921939 | Yes |
| 1099 | HMDB0041584                       | 3-Hydroxy-p-mentha-1,8-dien-7-al                     | C10H14O2 | 165.0921939 | Yes |
| 1099 | HMDB0062603; CHEBI:84225          | 2-(4-methoxyphenyl)propan-2-ol                       | C10H14O2 | 165.0921939 | Yes |
| 1099 | HMDB0127496                       | 1-ethyl-3,5-dimethoxybenzene                         | C10H14O2 | 165.0921939 | Yes |
| 1099 | HMDB0135742                       | 3-(4-methoxyphenyl)propan-1-ol                       | C10H14O2 | 165.0921939 | Yes |
| 1100 | HMDB0029742; CHEBI:256036         | 3-Isopropyl-2-methoxy-5-methylpyrazine               | C9H14N2O | 165.1031056 | No  |
| 1100 | HMDB0031860                       | 2-Methoxy-3-(2-methylpropyl)pyrazine                 | C9H14N2O | 165.1031056 | No  |
| 1100 | HMDB0032933                       | 2-Methoxy-3-(1-methylpropyl)pyrazine                 | C9H14N2O | 165.1031056 | No  |
| 1102 | HMDB0030002; CHEBI:525644         | (-)-Nopol                                            | C11H18O  | 165.1285788 | No  |
| 1102 | HMDB0030252                       | Limonene aldehyde                                    | C11H18O  | 165.1285788 | No  |
| 1102 | HMDB0031359                       | 2,4-Undecadienal                                     | C11H18O  | 165.1285788 | No  |
| 1102 | HMDB0031565                       | Dihydrojasnone                                       | C11H18O  | 165.1285788 | No  |
| 1102 | HMDB0031728                       | 2-Hexylidenecyclopentanone                           | C11H18O  | 165.1285788 | No  |
| 1102 | HMDB0032540                       | 2,6,6-Trimethyl-1-cyclohexen-1-acetaldehyde          | C11H18O  | 165.1285788 | No  |
| 1102 | HMDB0033546                       | 2,5-Undecadienal                                     | C11H18O  | 165.1285788 | No  |
| 1102 | HMDB0036190                       | 2-Heptylfuran                                        | C11H18O  | 165.1285788 | No  |
| 1102 | HMDB0036815                       | Norecasantalol                                       | C11H18O  | 165.1285788 | No  |
| 1108 | HMDB0030524; C14437               | 2(3H)-Benzothiazolethione                            | C7H5NS2  | 165.979219  | No  |
| 1111 | HMDB0006462                       | Homocysteinesulfinic acid                            | C4H9NO4S | 166.0179804 | No  |
| 1114 | HMDB0030383                       | Zapotidine                                           | C7H9N3S  | 166.0451799 | Yes |
| 1115 | HMDB0001545; C00250; CHEBI:17310  | Pyridoxal                                            | C8H9NO3  | 166.0510044 | No  |
| 1115 | HMDB0004290; C06051; CHEBI:17889  | Isopyridoxal                                         | C8H9NO3  | 166.0510044 | No  |
| 1115 | HMDB0034887                       | 3alpha,4,5,7alpha-Tetrahydro-5-hydroxy-1H-isoindole- | C8H9NO3  | 166.0510044 | No  |
| 1115 | HMDB0034889                       | 3alpha,4,7,7alpha-Tetrahydro-4-hydroxy-1H-isoindole- | C8H9NO3  | 166.0510044 | No  |
| 1115 | HMDB0060374; CHEBI:27440          | 3-Methoxyanthranilate                                | C8H9NO3  | 166.0510044 | No  |
| 1117 | HMDB0000022; C05587; CHEBI:742324 | 3-Methoxytyramine                                    | C9H13NO2 | 166.0873193 | No  |
| 1117 | HMDB0002182; C07441; CHEBI:8093   | Phenylephrine                                        | C9H13NO2 | 166.0873193 | No  |
| 1117 | HMDB0004826; C04548; CHEBI:29081  | p-Synephrine                                         | C9H13NO2 | 166.0873193 | No  |
| 1117 | HMDB0012162; CHEBI:1016357        | 4-Methoxytyramine                                    | C9H13NO2 | 166.0873193 | No  |
| 1117 | HMDB0014748; C07146; CHEBI:6794   | Metaraminol                                          | C9H13NO2 | 166.0873193 | No  |
| 1117 | HMDB0015165; C07832; CHEBI:4884   | Ethinamate                                           | C9H13NO2 | 166.0873193 | No  |
| 1117 | HMDB0032020; C07453               | 4-(beta-Methylaminoethyl)catechol                    | C9H13NO2 | 166.0873193 | No  |
| 1117 | HMDB0038869                       | Norpandamarilactonine A                              | C9H13NO2 | 166.0873193 | No  |
| 1117 | HMDB0039837                       | 2-(2-Furanyl)-3-piperidinol                          | C9H13NO2 | 166.0873193 | No  |
| 1117 | HMDB0041888; C07453               | Epinine                                              | C9H13NO2 | 166.0873193 | No  |
| 1117 | HMDB0060592                       | 4-Hydroxynorephedrine                                | C9H13NO2 | 166.0873193 | No  |
| 1117 | HMDB0060807                       | alpha-Methyldopamine                                 | C9H13NO2 | 166.0873193 | No  |
| 1117 | HMDB0062266; C19582; CHEBI:82576  | 1-(3-Pyridinyl)-1,4-butanediol                       | C9H13NO2 | 166.0873193 | No  |
| 1117 | HMDB0062811; C01869; CHEBI:119    | D-synephrine                                         | C9H13NO2 | 166.0873193 | No  |

|      |                                   |                                                        |           |             |     |
|------|-----------------------------------|--------------------------------------------------------|-----------|-------------|-----|
| 1119 | HMDB0030371                       | Myrtine                                                | C10H17NO  | 166.1236925 | No  |
| 1119 | HMDB0036030                       | Buccoxime                                              | C10H17NO  | 166.1236925 | No  |
| 1119 | HMDB0037864                       | 4-Ethyl-5-pentyloxazole                                | C10H17NO  | 166.1236925 | No  |
| 1119 | HMDB0037883                       | 2,4-Diethyl-5-propyloxazole                            | C10H17NO  | 166.1236925 | No  |
| 1119 | HMDB0037884                       | 2-Butyl-5-ethyl-4-methyloxazole                        | C10H17NO  | 166.1236925 | No  |
| 1119 | HMDB0037885                       | 5-Butyl-4-ethyl-2-methyloxazole                        | C10H17NO  | 166.1236925 | No  |
| 1119 | HMDB0037886                       | 2-Butyl-4-ethyl-5-methyloxazole                        | C10H17NO  | 166.1236925 | No  |
| 1119 | HMDB0037887                       | 4,5-Dimethyl-2-pentyloxazole                           | C10H17NO  | 166.1236925 | No  |
| 1119 | HMDB0037888                       | 4-Butyl-2-ethyl-5-methyloxazole                        | C10H17NO  | 166.1236925 | No  |
| 1124 | HMDB0000263; C00074; CHEBI:44897  | Phosphoenolpyruvic acid                                | C3H5O6P   | 166.9753138 | No  |
| 1127 | HMDB0033042                       | Methyl 1-(methylthio)propyl disulfide                  | C5H12S3   | 167.003725  | Yes |
| 1127 | HMDB0033046                       | Ethyl 1-(methylthio)ethyl disulfide                    | C5H12S3   | 167.003725  | Yes |
| 1127 | HMDB0033056                       | Ethyl (ethylthio)methyl disulfide                      | C5H12S3   | 167.003725  | Yes |
| 1127 | HMDB0033057                       | 1-(Ethylthio)ethyl methyl disulfide                    | C5H12S3   | 167.003725  | Yes |
| 1128 | HMDB0000289; C00366; CHEBI:17775  | Uric acid                                              | C5H4N4O3  | 167.0214313 | Yes |
| 1130 | HMDB0030929                       | 2,4,6,8-Tridecatetrayne                                | C13H12    | 167.0869155 | Yes |
| 1130 | HMDB0032610                       | 4-Methylbiphenyl                                       | C13H12    | 167.0869155 | Yes |
| 1130 | HMDB0038754                       | (E,E,E)-1,3,5,11-Tridecatetraene-7,9-diyne             | C13H12    | 167.0869155 | Yes |
| 1132 | HMDB0013105                       | trans-4,5-epoxy-2(E)-decenal                           | C10H16O2  | 167.1081043 | Yes |
| 1132 | HMDB0031156                       | Ethyl (4Z)-4,7-octadienoate                            | C10H16O2  | 167.1081043 | Yes |
| 1132 | HMDB0031273; CHEBI:51749          | Methyl octynecarboxylate                               | C10H16O2  | 167.1081043 | Yes |
| 1132 | HMDB0032219                       | (+/-)-Dihydromintlactone                               | C10H16O2  | 167.1081043 | Yes |
| 1132 | HMDB0032312                       | 2,4-Hexadienyl butyrate                                | C10H16O2  | 167.1081043 | Yes |
| 1132 | HMDB0032313                       | 2,4-Hexadienyl isobutyrate                             | C10H16O2  | 167.1081043 | Yes |
| 1132 | HMDB0032319                       | cis-3-Hexenyl crotonate                                | C10H16O2  | 167.1081043 | Yes |
| 1132 | HMDB0032434; CHEBI:25038          | (+/-)-2-(5-Methyl-5-vinyltetrahydrofuran-2-yl)propiona | C10H16O2  | 167.1081043 | Yes |
| 1132 | HMDB0033700                       | (-)-(Z)-Tetrahydro-6-(2-pentenyl)-2H-pyran-2-one       | C10H16O2  | 167.1081043 | Yes |
| 1132 | HMDB0034452                       | 5,6-Dihydro-6-pentyl-2H-pyran-2-one                    | C10H16O2  | 167.1081043 | Yes |
| 1132 | HMDB0034670                       | 6-Hydroxy-2,6-dimethyl-2,7-octadien-4-one              | C10H16O2  | 167.1081043 | Yes |
| 1132 | HMDB0035714                       | Epoxyartemisia ketone                                  | C10H16O2  | 167.1081043 | Yes |
| 1132 | HMDB0035766; C09836; CHEBI:2866   | Ascaridole                                             | C10H16O2  | 167.1081043 | Yes |
| 1132 | HMDB0035829                       | Dihydronepetalactone                                   | C10H16O2  | 167.1081043 | Yes |
| 1132 | HMDB0036067                       | Epoxycampholenic aldehyde                              | C10H16O2  | 167.1081043 | Yes |
| 1132 | HMDB0036103; C16461               | Geranic acid                                           | C10H16O2  | 167.1081043 | Yes |
| 1132 | HMDB0037014                       | gamma-Diosphenol                                       | C10H16O2  | 167.1081043 | Yes |
| 1132 | HMDB0037175                       | 4-Isopropyl-3-cyclohexene-1-carboxylic acid            | C10H16O2  | 167.1081043 | Yes |
| 1132 | HMDB0037821; C02108; CHEBI:488    | xi-1,8,8-Trimethyl-2-oxabicyclo[3.2.1]octan-3-one      | C10H16O2  | 167.1081043 | Yes |
| 1132 | HMDB0040639                       | (xi)-(Z)-5-(3-Hexenyl)dihydro-2(3H)-furanone           | C10H16O2  | 167.1081043 | Yes |
| 1149 | HMDB0000370; C05672; CHEBI:244030 | 2-Amino-3-phosphonopropionic acid                      | C3H8NO5P  | 168.0068753 | No  |
| 1151 | HMDB0000439; CHEBI:613373         | 2-Furoylglycine                                        | C7H7NO4   | 168.0299565 | Yes |
| 1151 | HMDB0012247; C03340; CHEBI:48052  | L-2,3-Dihydrodipicolinate                              | C7H7NO4   | 168.0299565 | Yes |
| 1153 | HMDB0000001; C01152; CHEBI:50599  | 1-Methylhistidine                                      | C7H11N3O2 | 168.0779119 | Yes |
| 1153 | HMDB0000479; C01152; CHEBI:27596  | 3-Methylhistidine                                      | C7H11N3O2 | 168.0779119 | Yes |
| 1165 | HMDB0060176; C11499; CHEBI:16712  | (S)-3-Sulfonatolactate                                 | C3H6O6S   | 168.9813432 | Yes |
| 1167 | HMDB0005807; C01424; CHEBI:30778  | Gallic acid                                            | C7H6O5    | 169.0135704 | Yes |
| 1167 | HMDB0029649                       | 2,4,6-Trihydroxybenzoic acid                           | C7H6O5    | 169.0135704 | Yes |
| 1167 | HMDB0040590                       | Benzyl methyl disulfide                                | C8H10S2   | 169.0135704 | Yes |
| 1167 | HMDB0059964                       | 2,3,4-Trihydroxybenzoic acid                           | C7H6O5    | 169.0135704 | Yes |
| 1167 | HMDB0126491                       | 2,4,5-trihydroxybenzoic acid                           | C7H6O5    | 169.0135704 | Yes |
| 1167 | HMDB0130402                       | 2,3,4,6-tetrahydroxybenzaldehyde                       | C7H6O5    | 169.0135704 | Yes |
| 1169 | HMDB0032234                       | 2,5-Dimethyl-3-furanthiol acetate                      | C8H10O2S  | 169.0335079 | Yes |
| 1169 | HMDB0037732                       | S-(2-Furanylmethyl) propanethioate                     | C8H10O2S  | 169.0335079 | Yes |
| 1171 | HMDB0014690; C07569; CHEBI:8502   | Propylthiouracil                                       | C7H10N2O5 | 169.0436725 | No  |
| 1172 | HMDB0000318; C05576; CHEBI:1387   | 3,4-Dihydroxyphenylglycol                              | C8H10O4   | 169.0506125 | Yes |
| 1172 | HMDB0032966                       | Furaneol acetate                                       | C8H10O4   | 169.0506125 | Yes |
| 1172 | HMDB0038760                       | Herierin III                                           | C8H10O4   | 169.0506125 | Yes |
| 1172 | HMDB0038761                       | Herierin IV                                            | C8H10O4   | 169.0506125 | Yes |
| 1172 | HMDB0059756; CHEBI:89898          | 3,4-Methyleneadipic acid                               | C8H10O4   | 169.0506125 | Yes |
| 1172 | HMDB0132906                       | 3,5-dimethoxybenzene-1,2-diol                          | C8H10O4   | 169.0506125 | Yes |
| 1172 | HMDB0132907                       | 2,6-dimethoxybenzene-1,4-diol                          | C8H10O4   | 169.0506125 | Yes |
| 1172 | HMDB0133971                       | 3,4-dimethoxybenzene-1,2-diol                          | C8H10O4   | 169.0506125 | Yes |

|      |                                   |                                                        |           |             |     |
|------|-----------------------------------|--------------------------------------------------------|-----------|-------------|-----|
| 1172 | HMDB0133972                       | 2,3-dimethoxybenzene-1,4-diol                          | C8H10O4   | 169.0506125 | Yes |
| 1172 | HMDB0133982                       | 4,5-dimethoxybenzene-1,3-diol                          | C8H10O4   | 169.0506125 | Yes |
| 1175 | HMDB0032412; CHEBI:52364          | Methyl beta-naphthyl ketone                            | C12H10O   | 169.0660181 | Yes |
| 1175 | HMDB0032582; C02499; CHEBI:17043  | 2-Biphenylol                                           | C12H10O   | 169.0660181 | Yes |
| 1175 | HMDB0034446; C07733; CHEBI:39258  | Diphenyl ether                                         | C12H10O   | 169.0660181 | Yes |
| 1177 | HMDB0030471                       | 1,4-Isopomeadiol                                       | C9H14O3   | 169.086806  | Yes |
| 1177 | HMDB0038276                       | cis-3-Hexenyl pyruvate                                 | C9H14O3   | 169.086806  | Yes |
| 1178 | HMDB0015333; C07841; CHEBI:352567 | Levetiracetam                                          | C8H14N2O2 | 169.0981886 | No  |
| 1178 | HMDB0033926                       | (3xi,6xi)-Cyclo(alanylvalyl)                           | C8H14N2O2 | 169.0981886 | No  |
| 1179 | HMDB0059701                       | 1,6,7-Trimethylnaphthalene                             | C13H14    | 169.1031253 | No  |
| 1179 | HMDB0059733                       | 1,4,5-Trimethyl-naphtalene                             | C13H14    | 169.1031253 | No  |
| 1180 | HMDB0004980; CHEBI:32380          | cis-4-Decenoic acid                                    | C10H18O2  | 169.1233716 | No  |
| 1180 | HMDB0010726; CHEBI:50467          | trans-Dec-2-enoic acid                                 | C10H18O2  | 169.1233716 | No  |
| 1180 | HMDB0012183; C18202               | 8-Methylnonenoate                                      | C10H18O2  | 169.1233716 | No  |
| 1180 | HMDB0029358                       | 5Z-Octenyl acetate                                     | C10H18O2  | 169.1233716 | No  |
| 1180 | HMDB0029859                       | Methyl (xi)-3-nonenolate                               | C10H18O2  | 169.1233716 | No  |
| 1180 | HMDB0030031                       | (±)-6-Methyl-5-hepten-2-yl acetate                     | C10H18O2  | 169.1233716 | No  |
| 1180 | HMDB0031002                       | 3-Decenoic acid                                        | C10H18O2  | 169.1233716 | No  |
| 1180 | HMDB0031003; CHEBI:32381          | 9-Decenoic acid                                        | C10H18O2  | 169.1233716 | No  |
| 1180 | HMDB0031297                       | 2-Octenyl acetate                                      | C10H18O2  | 169.1233716 | No  |
| 1180 | HMDB0031362                       | Cyclohexylethyl acetate                                | C10H18O2  | 169.1233716 | No  |
| 1180 | HMDB0031440                       | Linalool oxide (trans-pyranoid)                        | C10H18O2  | 169.1233716 | No  |
| 1180 | HMDB0031441                       | Linalool oxide III                                     | C10H18O2  | 169.1233716 | No  |
| 1180 | HMDB0032119                       | 4-Hydroxy-2,6-dimethyl-7-octen-3-one                   | C10H18O2  | 169.1233716 | No  |
| 1180 | HMDB0032275                       | Ethyl 3-octenoate                                      | C10H18O2  | 169.1233716 | No  |
| 1180 | HMDB0032393                       | 2-Methylbutyl 3-methyl-2-butenolate                    | C10H18O2  | 169.1233716 | No  |
| 1180 | HMDB0032452                       | 1-Octen-3-yl acetate                                   | C10H18O2  | 169.1233716 | No  |
| 1180 | HMDB0033203                       | 6-Decanolide                                           | C10H18O2  | 169.1233716 | No  |
| 1180 | HMDB0033377                       | cis-3-Hexenyl butyrate                                 | C10H18O2  | 169.1233716 | No  |
| 1180 | HMDB0034427                       | Cyclohexyl butanoate                                   | C10H18O2  | 169.1233716 | No  |
| 1180 | HMDB0034581                       | 2-Hexenyl butanoate                                    | C10H18O2  | 169.1233716 | No  |
| 1180 | HMDB0034880                       | 3-Methyl-2,4-nonanedione                               | C10H18O2  | 169.1233716 | No  |
| 1180 | HMDB0035122                       | (S,E)-2,6-Dimethyl-5,7-octadiene-2,3-diol              | C10H18O2  | 169.1233716 | No  |
| 1180 | HMDB0035365                       | Cnidiol C                                              | C10H18O2  | 169.1233716 | No  |
| 1180 | HMDB0035837; C16462               | Citronellic acid                                       | C10H18O2  | 169.1233716 | No  |
| 1180 | HMDB0035839                       | (E)-3-(Tetrahydro-5,5-dimethyl-2-furanyl)-2-buten-1-ol | C10H18O2  | 169.1233716 | No  |
| 1180 | HMDB0035907; CHEBI:88534          | Linalyl oxide                                          | C10H18O2  | 169.1233716 | No  |
| 1180 | HMDB0036099                       | Lilac alcohol                                          | C10H18O2  | 169.1233716 | No  |
| 1180 | HMDB0036211                       | Hexyl crotonate                                        | C10H18O2  | 169.1233716 | No  |
| 1180 | HMDB0036990                       | 2,6-Dimethyl-3,7-octadiene-2,6-diol                    | C10H18O2  | 169.1233716 | No  |
| 1180 | HMDB0036992                       | 1-Cyclopropyl-4-methyl-1,3-cyclohexanediol             | C10H18O2  | 169.1233716 | No  |
| 1180 | HMDB0037021                       | trans-p-Menth-2-ene-1,4-diol                           | C10H18O2  | 169.1233716 | No  |
| 1180 | HMDB0037116; CHEBI:87327          | delta-Decalactone                                      | C10H18O2  | 169.1233716 | No  |
| 1180 | HMDB0037217                       | xi-5-Hexyldihydro-2(3H)-furanone                       | C10H18O2  | 169.1233716 | No  |
| 1180 | HMDB0037497                       | Ethyl (E)-2-octenoate                                  | C10H18O2  | 169.1233716 | No  |
| 1180 | HMDB0037632                       | xi-Tetrahydro-3-pentyl-2H-pyran-2-one                  | C10H18O2  | 169.1233716 | No  |
| 1180 | HMDB0038744                       | 9-Hydroxygeraniol                                      | C10H18O2  | 169.1233716 | No  |
| 1180 | HMDB0039149                       | (+)-6-Hydroxy-2,6-dimethyl-7-octen-4-one               | C10H18O2  | 169.1233716 | No  |
| 1180 | HMDB0039768                       | 5-Decenoic acid                                        | C10H18O2  | 169.1233716 | No  |
| 1180 | HMDB0039795                       | Ethyl 4Z-octenoate                                     | C10H18O2  | 169.1233716 | No  |
| 1180 | HMDB0040194                       | Methyl 2-nonenolate                                    | C10H18O2  | 169.1233716 | No  |
| 1180 | HMDB0040208                       | 2-Propenyl heptanoate                                  | C10H18O2  | 169.1233716 | No  |
| 1180 | HMDB0040213                       | cis-3-Hexenyl isobutyrate                              | C10H18O2  | 169.1233716 | No  |
| 1180 | HMDB0040330; C18066; CHEBI:50243  | Menthone lactone                                       | C10H18O2  | 169.1233716 | No  |
| 1180 | HMDB0040530                       | Isopentyl 3-methyl-2-butenolate                        | C10H18O2  | 169.1233716 | No  |
| 1180 | HMDB0040726; CHEBI:88903          | (±)-cis-Linalyl oxide                                  | C10H18O2  | 169.1233716 | No  |
| 1180 | HMDB0040727                       | (±)-trans-Linalyl oxide                                | C10H18O2  | 169.1233716 | No  |
| 1180 | HMDB0041012                       | 6-Decenoic acid                                        | C10H18O2  | 169.1233716 | No  |
| 1180 | HMDB0041630                       | (+)-cis-Linalool 3,7-oxide                             | C10H18O2  | 169.1233716 | No  |
| 1180 | HMDB0059610; CHEBI:16271          | 2-Exo-hydroxy-1,8-cineole                              | C10H18O2  | 169.1233716 | No  |
| 1180 | HMDB0059852; C20326               | 2-Hydroxycineol                                        | C10H18O2  | 169.1233716 | No  |

|      |                                  |                                                   |           |             |     |
|------|----------------------------------|---------------------------------------------------|-----------|-------------|-----|
| 1192 | HMDB0032420                      | 2-(4-Methyl-5-thiazolyl)ethyl formate             | C7H9NO2S  | 170.0282438 | No  |
| 1194 | HMDB0012289; C03972; CHEBI:32976 | Tetrahydrodipicolinate                            | C7H9NO4   | 170.0459069 | No  |
| 1195 | HMDB0015052; C07203; CHEBI:6909  | Metronidazole                                     | C6H9N3O3  | 170.0581767 | No  |
| 1199 | HMDB0005015; CHEBI:42797         | Gabapentin                                        | C9H17NO2  | 170.1187497 | No  |
| 1219 | HMDB0000126; C00093; CHEBI:15978 | Glycerol 3-phosphate                              | C3H9O6P   | 171.0066155 | Yes |
| 1219 | HMDB0002520; C02979; CHEBI:17270 | Beta-Glycerophosphoric acid                       | C3H9O6P   | 171.0066155 | Yes |
| 1220 | HMDB0059933; C06677; CHEBI:27849 | p-Toluenesulfonic acid                            | C7H8O3S   | 171.0122857 | No  |
| 1221 | HMDB0031868                      | Monomethyl phenylphosphonate                      | C7H9O3P   | 171.0213463 | No  |
| 1224 | HMDB0001212; C05565              | Hydantoin-5-propionic acid                        | C6H8N2O4  | 171.0409808 | Yes |
| 1224 | HMDB0034322                      | L-alpha-Amino-5-oxo-2(5H)-isoxazolepropanoic acid | C6H8N2O4  | 171.0409808 | Yes |
| 1225 | HMDB0001892; C05377; CHEBI:28869 | Menadione                                         | C11H8O2   | 171.0450091 | No  |
| 1225 | HMDB0033765; C08446              | Methyl (Z)-2-decene-4,6,8-trienoate               | C11H8O2   | 171.0450091 | No  |
| 1226 | HMDB0037296                      | 3-Acetyl-2,7-naphthyridine                        | C10H8N2O  | 171.0564385 | No  |
| 1226 | HMDB0038462                      | 4-Hydroxy-1H-indole-3-acetonitrile                | C10H8N2O  | 171.0564385 | No  |
| 1227 | HMDB0000341; CHEBI:89192         | 2-Octenedioic acid                                | C8H12O4   | 171.0664559 | No  |
| 1227 | HMDB0004982                      | cis-4-Octenedioic acid                            | C8H12O4   | 171.0664559 | No  |
| 1227 | HMDB0013312                      | trans-3-Octenedioic acid                          | C8H12O4   | 171.0664559 | No  |
| 1227 | HMDB0032352                      | 3-Isopropenylpentanedioic acid                    | C8H12O4   | 171.0664559 | No  |
| 1227 | HMDB0034851                      | Ethyl 2,4-dioxohexanoate                          | C8H12O4   | 171.0664559 | No  |
| 1227 | HMDB0038601; CHEBI:68508         | Diethyl fumarate                                  | C8H12O4   | 171.0664559 | No  |
| 1228 | HMDB0000721; CHEBI:356660        | Glycylproline                                     | C7H12N2O3 | 171.0776209 | Yes |
| 1228 | HMDB0011178; CHEBI:356329        | L-prolyl-L-glycine                                | C7H12N2O3 | 171.0776209 | Yes |
| 1229 | HMDB0029688                      | 2-Ethoxynaphthalene                               | C12H12O   | 171.0815097 | Yes |
| 1229 | HMDB0031621                      | Cinnamylideneacetone                              | C12H12O   | 171.0815097 | Yes |
| 1230 | HMDB0031699                      | S-(3-Methyl-2-butenyl) 2-methylpropanethioate     | C9H16OS   | 171.084631  | No  |
| 1230 | HMDB0039467                      | Allyl thiohexanoate                               | C9H16OS   | 171.084631  | No  |
| 1231 | HMDB0036188                      | Tetrahydrofurfuryl butyrate                       | C9H16O3   | 171.1026671 | Yes |
| 1231 | HMDB0036213                      | cis-3-Hexenyl lactate                             | C9H16O3   | 171.1026671 | Yes |
| 1231 | HMDB0036396                      | 3-Methylbutyl 3-oxobutanoate                      | C9H16O3   | 171.1026671 | Yes |
| 1231 | HMDB0040165                      | Butyl levulinate                                  | C9H16O3   | 171.1026671 | Yes |
| 1231 | HMDB0040202                      | Butyl 3-hydroxy-2-methylidenebutanoate            | C9H16O3   | 171.1026671 | Yes |
| 1231 | HMDB0040203                      | 2-Methylpropyl 3-hydroxy-2-methylidenebutanoate   | C9H16O3   | 171.1026671 | Yes |
| 1231 | HMDB0059936                      | 5-Pentyl-1,4-dioxan-2-one                         | C9H16O3   | 171.1026671 | Yes |
| 1231 | HMDB0059937                      | 6-Pentyl-1,4-dioxan-2-one                         | C9H16O3   | 171.1026671 | Yes |
| 1231 | HMDB0060287                      | 4-Hydroperoxy-2-nonenal                           | C9H16O3   | 171.1026671 | Yes |
| 1231 | HMDB0094711; CHEBI:78700         | 9-Oxo-nonanoic acid                               | C9H16O3   | 171.1026671 | Yes |
| 1246 | HMDB0000842; C06325; CHEBI:18386 | Quinaldic acid                                    | C10H7NO2  | 172.040614  | No  |
| 1246 | HMDB0062188; C14040; CHEBI:34104 | 1-nitronaphthalene                                | C10H7NO2  | 172.040614  | No  |
| 1248 | HMDB0006488; C01250; CHEBI:16319 | N-Acetyl-L-glutamate 5-semialdehyde               | C7H11NO4  | 172.0616402 | No  |
| 1249 | HMDB0004225; C03771; CHEBI:58489 | 2-Oxoarginine                                     | C6H11N3O3 | 172.0727551 | No  |
| 1252 | HMDB0000701; CHEBI:64390         | Hexanoylglycine                                   | C8H15NO3  | 172.0979188 | No  |
| 1252 | HMDB0000747                      | Isovalerylalanine                                 | C8H15NO3  | 172.0979188 | No  |
| 1252 | HMDB0002087                      | Isovalerylsarcosine                               | C8H15NO3  | 172.0979188 | No  |
| 1252 | HMDB0011756; C02710; CHEBI:17786 | N-Acetylleucine                                   | C8H15NO3  | 172.0979188 | No  |
| 1252 | HMDB0061684; CHEBI:84056         | N-Acetylsoleucine                                 | C8H15NO3  | 172.0979188 | No  |
| 1268 | HMDB0060015; C00850; CHEBI:27905 | Phenol sulphate                                   | C6H6O4S   | 172.9917773 | Yes |
| 1269 | HMDB0000072; C00417; CHEBI:32805 | cis-Aconitic acid                                 | C6H6O6    | 173.0083949 | Yes |
| 1269 | HMDB0000958; C02341; CHEBI:32806 | trans-Aconitic acid                               | C6H6O6    | 173.0083949 | Yes |
| 1269 | HMDB0001264; C00425; CHEBI:17242 | Dehydroascorbic acid                              | C6H6O6    | 173.0083949 | Yes |
| 1271 | HMDB0003070; C00493; CHEBI:16119 | Shikimic acid                                     | C7H10O5   | 173.0458291 | Yes |
| 1271 | HMDB0012149; C04236; CHEBI:1467  | 2-Isopropyl-3-oxosuccinate                        | C7H10O5   | 173.0458291 | Yes |
| 1271 | HMDB0061388                      | Dimethyl 2-oxoglutarate                           | C7H10O5   | 173.0458291 | Yes |
| 1271 | HMDB0062194                      | 2,6-dimethyl-trans-2-heptenoyl-CoA                | C7H10O5   | 173.0458291 | Yes |
| 1271 | HMDB0062377                      | 4(R),8-dimethyl-trans-2-nonenoyl-CoA              | C7H10O5   | 173.0458291 | Yes |
| 1271 | HMDB0130150                      | 3,4,5-trihydroxycyclohex-1-ene-1-carboxylic acid  | C7H10O5   | 173.0458291 | Yes |
| 1272 | HMDB0031845                      | 3-Propylidene-1(3H)-isobenzofuranone              | C11H10O2  | 173.0602628 | Yes |
| 1272 | HMDB0032727                      | 4-Methoxy-1-naphthol                              | C11H10O2  | 173.0602628 | Yes |
| 1273 | HMDB0000893; C08278; CHEBI:9300  | Suberic acid                                      | C8H14O4   | 173.0821894 | Yes |
| 1273 | HMDB0002023                      | Ethyladipic acid                                  | C8H14O4   | 173.0821894 | Yes |
| 1273 | HMDB0033838                      | Diethyl succinate                                 | C8H14O4   | 173.0821894 | Yes |
| 1273 | HMDB0041606; C14570              | Dimethyl adipate                                  | C8H14O4   | 173.0821894 | Yes |

|      |                                   |                                                            |           |             |     |
|------|-----------------------------------|------------------------------------------------------------|-----------|-------------|-----|
| 1273 | HMDB0059727; CHEBI:89933          | 2,4-Dimethyladipic acid                                    | C8H14O4   | 173.0821894 | Yes |
| 1273 | HMDB0059757                       | 3-Methylpimelic acid                                       | C8H14O4   | 173.0821894 | Yes |
| 1273 | HMDB0060684; C16658; CHEBI:80644  | 2-Propylglutaric acid                                      | C8H14O4   | 173.0821894 | Yes |
| 1274 | HMDB0003357; C00437; CHEBI:16543  | N-Acetylornithine                                          | C7H14N2O3 | 173.0933897 | Yes |
| 1274 | HMDB0028854                       | Glycyl-Valine                                              | C7H14N2O3 | 173.0933897 | Yes |
| 1274 | HMDB0029127                       | Valyl-Glycine                                              | C7H14N2O3 | 173.0933897 | Yes |
| 1274 | HMDB0034365                       | L-Theanine                                                 | C7H14N2O3 | 173.0933897 | Yes |
| 1274 | HMDB0062764; C01047; CHEBI:17394  | N(5)-ethyl-L-glutamine                                     | C7H14N2O3 | 173.0933897 | Yes |
| 1274 | HMDB0094702                       | Gly-Norvaline                                              | C7H14N2O3 | 173.0933897 | Yes |
| 1275 | HMDB0031622                       | 6-Phenyl-3-hexen-2-one                                     | C12H14O   | 173.0989478 | Yes |
| 1275 | HMDB0037281                       | 4-Methyl-2-phenyl-2-pentenal                               | C12H14O   | 173.0989478 | Yes |
| 1275 | HMDB0039153                       | (R)-11,12,13-Trinor-1(5),6,9-guaiatrien-8-one              | C12H14O   | 173.0989478 | Yes |
| 1275 | HMDB0039466                       | Hexanethioic acid S-propyl ester                           | C9H18OS   | 173.0989478 | Yes |
| 1275 | HMDB0040823                       | (S)-11,12,13-Trinor-7-calamenone                           | C12H14O   | 173.0989478 | Yes |
| 1277 | HMDB0031513                       | (±)-3-Hydroxynonanoidic acid                               | C9H18O3   | 173.1194703 | Yes |
| 1277 | HMDB0034040                       | 2,4,6-Triethyl-1,3,5-trioxane                              | C9H18O3   | 173.1194703 | Yes |
| 1278 | HMDB0013287; C05545               | Ne,Ne dimethyllysine                                       | C8H18N2O2 | 173.1298235 | Yes |
| 1293 | HMDB0000812; C01042; CHEBI:21547  | N-Acetyl-L-aspartic acid                                   | C6H9NO5   | 174.0408111 | Yes |
| 1293 | HMDB0003470; C01045; CHEBI:48309  | N-Formyl-L-glutamic acid                                   | C6H9NO5   | 174.0408111 | Yes |
| 1293 | HMDB0031577                       | Berteroin                                                  | C7H13NS2  | 174.0408111 | Yes |
| 1293 | HMDB0039163                       | D-N-(Carboxyacetyl)alanine                                 | C6H9NO5   | 174.0408111 | Yes |
| 1293 | HMDB0060273; CHEBI:28095          | 2-Amino-3-oxoadipate                                       | C6H9NO5   | 174.0408111 | Yes |
| 1294 | HMDB0000197; C00954; CHEBI:16411  | Indoleacetic acid                                          | C10H9NO2  | 174.0559159 | Yes |
| 1294 | HMDB0004073; C05634; CHEBI:50157  | 5-Hydroxyindoleacetaldehyde                                | C10H9NO2  | 174.0559159 | Yes |
| 1294 | HMDB0038628                       | Hydroxymethyl indol-3-yl ketone                            | C10H9NO2  | 174.0559159 | Yes |
| 1294 | HMDB0040972                       | 1-Methoxy-1H-indole-3-carboxaldehyde                       | C10H9NO2  | 174.0559159 | Yes |
| 1295 | HMDB0002201                       | N-Carboxyethyl-g-aminobutyric acid                         | C7H13NO4  | 174.0771607 | No  |
| 1295 | HMDB0034252; CHEBI:64305          | 2-Aminoheptanedioic acid                                   | C7H13NO4  | 174.0771607 | No  |
| 1295 | HMDB0036383                       | Calystegine B5                                             | C7H13NO4  | 174.0771607 | No  |
| 1295 | HMDB0038594; C10851               | Calystegine B2                                             | C7H13NO4  | 174.0771607 | No  |
| 1295 | HMDB0094717                       | hydroxyvalerylglycine                                      | C7H13NO4  | 174.0771607 | No  |
| 1317 | HMDB0000044; C00072; CHEBI:17208  | Ascorbic acid                                              | C6H8O6    | 175.0251535 | No  |
| 1317 | HMDB0006355; C02670; CHEBI:18268  | D-Glucurono-6,3-lactone                                    | C6H8O6    | 175.0251535 | No  |
| 1317 | HMDB0031193; C19806; CHEBI:45969  | 1,2,3-Propanetricarboxylic acid                            | C6H8O6    | 175.0251535 | No  |
| 1318 | HMDB0000402; C02504; CHEBI:35128  | 2-Isopropylmalic acid                                      | C7H12O5   | 175.0613898 | Yes |
| 1318 | HMDB0002025                       | 2,3-Dimethyl-3-hydroxyglutaric acid                        | C7H12O5   | 175.0613898 | Yes |
| 1318 | HMDB0012156; C04411; CHEBI:35114  | 3-Isopropylmalate                                          | C7H12O5   | 175.0613898 | Yes |
| 1318 | HMDB0029169                       | 3-Hydroxy-2-methylglutarate                                | C7H12O5   | 175.0613898 | Yes |
| 1318 | HMDB0031712                       | (±)-Glycerol 1,2-diacetate                                 | C7H12O5   | 175.0613898 | Yes |
| 1319 | HMDB0028696                       | Alanyl-Serine                                              | C6H12N2O4 | 175.0722575 | Yes |
| 1319 | HMDB0028851                       | Glycyl-Threonine                                           | C6H12N2O4 | 175.0722575 | Yes |
| 1319 | HMDB0029032                       | Seriny-Alanine                                             | C6H12N2O4 | 175.0722575 | Yes |
| 1319 | HMDB0029061                       | Threoninyl-Glycine                                         | C6H12N2O4 | 175.0722575 | Yes |
| 1320 | HMDB0002706; C00308; CHEBI:405237 | Canavanine                                                 | C5H12N4O3 | 175.0835523 | No  |
| 1337 | HMDB0001015; C03145; CHEBI:16552  | N-Formyl-L-methionine                                      | C6H11NO3S | 176.0387115 | Yes |
| 1337 | HMDB0029417                       | Cycloalliin                                                | C6H11NO3S | 176.0387115 | Yes |
| 1337 | HMDB0029441; C08295               | Isoalliin                                                  | C6H11NO3S | 176.0387115 | Yes |
| 1337 | HMDB0033592; C08265               | (R)(C)(S)-Alliin                                           | C6H11NO3S | 176.0387115 | Yes |
| 1337 | HMDB0033843                       | Polyvidone                                                 | C6H13NOP2 | 176.0387115 | Yes |
| 1343 | HMDB0014968; CHEBI:775159         | Phenmetrazine                                              | C11H15NO  | 176.1073025 | No  |
| 1343 | HMDB0033484; C09991               | (S)-Valerianine                                            | C11H15NO  | 176.1073025 | No  |
| 1343 | HMDB0039664                       | 7-Ethyl-2,3,6,7-tetrahydrocyclopent[b]azepin-8(1H)-on      | C11H15NO  | 176.1073025 | No  |
| 1343 | HMDB0039667                       | 2,3,6,7-Tetrahydro-6,7-dimethylcyclopent[b]azepin-8(1H)-on | C11H15NO  | 176.1073025 | No  |
| 1343 | HMDB0040014                       | 1-(2,3-Dihydro-1H-pyrrolizin-5-yl)-1-butanone              | C11H15NO  | 176.1073025 | No  |
| 1343 | HMDB0040017                       | 2,3-Dihydro-7-methyl-5-propanoyl-1H-pyrrolizine            | C11H15NO  | 176.1073025 | No  |
| 1343 | HMDB0040018                       | 2,3-Dihydro-6-methyl-5-propanoyl-1H-pyrrolizine            | C11H15NO  | 176.1073025 | No  |
| 1343 | HMDB0040019                       | 1-(2,3-Dihydro-5-ethyl-1H-pyrrolizin-7-yl)ethanone         | C11H15NO  | 176.1073025 | No  |
| 1343 | HMDB0040020                       | 5-Acetyl-2,3-dihydro-6,7-dimethyl-1H-pyrrolizine           | C11H15NO  | 176.1073025 | No  |
| 1343 | HMDB0040027                       | 1-(2,3-Dihydro-5,6-dimethyl-1H-pyrrolizin-7-yl)ethanol     | C11H15NO  | 176.1073025 | No  |
| 1343 | HMDB0041923; CHEBI:59331          | Mephedrone                                                 | C11H15NO  | 176.1073025 | No  |
| 1344 | HMDB0014362; CHEBI:37937          | Bethanidine                                                | C10H15N3  | 176.1175502 | No  |

|      |                                   |                                                      |           |             |     |
|------|-----------------------------------|------------------------------------------------------|-----------|-------------|-----|
| 1356 | HMDB0031154; CHEBI:302136         | Allitridin                                           | C6H10S3   | 176.9873554 | No  |
| 1361 | HMDB0031162; CHEBI:1093323        | 3,3''-Thiobispropanoic acid                          | C6H10O4S  | 177.0219518 | Yes |
| 1363 | HMDB0000150; C00198; CHEBI:16217  | Gluconolactone                                       | C6H10O6   | 177.0405783 | Yes |
| 1363 | HMDB0001353; C01216; CHEBI:17028  | 2-Keto-3-deoxy-D-gluconic acid                       | C6H10O6   | 177.0405783 | Yes |
| 1363 | HMDB0001385; C05394; CHEBI:27453  | 3-Keto-b-D-galactose                                 | C6H10O6   | 177.0405783 | Yes |
| 1363 | HMDB0002541; C03383; CHEBI:15895  | Galactonolactone                                     | C6H10O6   | 177.0405783 | Yes |
| 1363 | HMDB0003466; C01040; CHEBI:17587  | L-Gulonolactone                                      | C6H10O6   | 177.0405783 | Yes |
| 1363 | HMDB0029932; CHEBI:52417          | D-Arabino-hexos-2-ulose                              | C6H10O6   | 177.0405783 | Yes |
| 1363 | HMDB0031714                       | Methylthiomethyl 2-methylbutanethiolate              | C7H14OS2  | 177.0405783 | Yes |
| 1364 | HMDB0002040; CHEBI:260249         | 4-Methoxycinnamic acid                               | C10H10O3  | 177.0556439 | Yes |
| 1364 | HMDB0030903                       | 3-(4-Methylphenyl)oxiranecarboxylic acid             | C10H10O3  | 177.0556439 | Yes |
| 1364 | HMDB0031055                       | (Z)-10-Hydroxy-8-decene-4,6-dienoic acid             | C10H10O3  | 177.0556439 | Yes |
| 1364 | HMDB0033248                       | Di-alpha-furfuryl ether                              | C10H10O3  | 177.0556439 | Yes |
| 1364 | HMDB0038712                       | (S)-Isosclerone                                      | C10H10O3  | 177.0556439 | Yes |
| 1364 | HMDB0038965                       | (E)-10-Hydroxy-2-decene-4,6-dienoic acid             | C10H10O3  | 177.0556439 | Yes |
| 1364 | HMDB0039471                       | 3-(4-Hydroxy-2-methoxyphenyl)-2-propenal             | C10H10O3  | 177.0556439 | Yes |
| 1364 | HMDB0062273; C14784; CHEBI:34048  | 1,2-Dihydroxy-3,4-epoxy-1,2,3,4-tetrahydronaphthalen | C10H10O3  | 177.0556439 | Yes |
| 1364 | HMDB0062729; CHEBI:84260          | Ethyl Phenylglyoxylate                               | C10H10O3  | 177.0556439 | Yes |
| 1364 | HMDB0125103                       | 3-(3-methoxyphenyl)prop-2-enoic acid                 | C10H10O3  | 177.0556439 | Yes |
| 1364 | HMDB0125518                       | (2E)-3-(3-methoxyphenyl)prop-2-enoic acid            | C10H10O3  | 177.0556439 | Yes |
| 1364 | HMDB0131168                       | methyl (2E)-3-(4-hydroxyphenyl)prop-2-enoate         | C10H10O3  | 177.0556439 | Yes |
| 1364 | HMDB0133457                       | 4-(3,4-dihydroxyphenyl)but-3-en-2-one                | C10H10O3  | 177.0556439 | Yes |
| 1364 | HMDB0133611                       | (2Z)-2-(hydroxymethyl)-3-phenylprop-2-enoic acid     | C10H10O3  | 177.0556439 | Yes |
| 1364 | HMDB0133612                       | (2E)-3-(3-hydroxyphenyl)-2-methylprop-2-enoic acid   | C10H10O3  | 177.0556439 | Yes |
| 1364 | HMDB0133613                       | (2E)-3-(4-hydroxyphenyl)-2-methylprop-2-enoic acid   | C10H10O3  | 177.0556439 | Yes |
| 1364 | HMDB0133614                       | 2-methyl-3-phenyloxirane-2-carboxylic acid           | C10H10O3  | 177.0556439 | Yes |
| 1364 | HMDB0133615                       | (2E)-3-(2-hydroxyphenyl)-2-methylprop-2-enoic acid   | C10H10O3  | 177.0556439 | Yes |
| 1364 | HMDB0134055                       | 3-(2-hydroxy-3-methoxyphenyl)prop-2-enal             | C10H10O3  | 177.0556439 | Yes |
| 1364 | HMDB0135647                       | (2Z)-2-hydroxy-3-(4-methoxyphenyl)prop-2-enal        | C10H10O3  | 177.0556439 | Yes |
| 1364 | HMDB0135649                       | 3-(2-hydroxy-4-methoxyphenyl)prop-2-enal             | C10H10O3  | 177.0556439 | Yes |
| 1364 | HMDB0135650                       | 3-(4-methoxyphenyl)oxirane-2-carbaldehyde            | C10H10O3  | 177.0556439 | Yes |
| 1364 | HMDB0135651                       | 3-(4-methoxyphenyl)prop-2-enoic acid                 | C10H10O3  | 177.0556439 | Yes |
| 1364 | HMDB0141076                       | 4-(2,4-dihydroxyphenyl)but-3-en-2-one                | C10H10O3  | 177.0556439 | Yes |
| 1364 | HMDB0141077                       | 1-[3-(4-hydroxyphenyl)oxiran-2-yl]ethan-1-one        | C10H10O3  | 177.0556439 | Yes |
| 1364 | HMDB0141078                       | 1-hydroxy-4-(4-hydroxyphenyl)but-3-en-2-one          | C10H10O3  | 177.0556439 | Yes |
| 1364 | HMDB0141782                       | (2E)-3-(4-hydroxy-3-methoxyphenyl)prop-2-enal        | C10H10O3  | 177.0556439 | Yes |
| 1365 | HMDB0001267                       | 4-Oxo-4-(3-pyridyl)-butanamide                       | C9H10N2O2 | 177.0665037 | Yes |
| 1365 | HMDB0004145                       | BOX B                                                | C9H10N2O2 | 177.0665037 | Yes |
| 1365 | HMDB0004146                       | BOX A                                                | C9H10N2O2 | 177.0665037 | Yes |
| 1365 | HMDB0015253; C07428; CHEBI:183000 | Phenacemide                                          | C9H10N2O2 | 177.0665037 | Yes |
| 1366 | HMDB0033187                       | 2,12-Tetradecadiene-4,6,8,10-tetrayne                | C14H10    | 177.0715657 | No  |
| 1367 | HMDB0029569                       | Dibutyl disulfide                                    | C8H18S2   | 177.0768652 | No  |
| 1367 | HMDB0033789                       | 2-O-Methyl-L-fucose                                  | C7H14O5   | 177.0768652 | No  |
| 1367 | HMDB0040348                       | 1,8-Octanedithiol                                    | C8H18S2   | 177.0768652 | No  |
| 1368 | HMDB0002043; CHEBI:40131          | 5-Phenylvaleric acid                                 | C11H14O2  | 177.0922971 | No  |
| 1368 | HMDB0031250                       | Phenylmethyl 2-methylpropanoate                      | C11H14O2  | 177.0922971 | No  |
| 1368 | HMDB0031864; C10454; CHEBI:4918   | Methyleugenol                                        | C11H14O2  | 177.0922971 | No  |
| 1368 | HMDB0033376                       | Phenylmethyl butanoate                               | C11H14O2  | 177.0922971 | No  |
| 1368 | HMDB0033386; C17663; CHEBI:81257  | 3-Phenylpropyl acetate                               | C11H14O2  | 177.0922971 | No  |
| 1368 | HMDB0033597                       | 4-(4-Methoxyphenyl)-2-butanone                       | C11H14O2  | 177.0922971 | No  |
| 1368 | HMDB0035013                       | 2-Phenylethyl propanoate                             | C11H14O2  | 177.0922971 | No  |
| 1368 | HMDB0036235                       | alpha,alpha-Dimethylphenethyl formate                | C11H14O2  | 177.0922971 | No  |
| 1368 | HMDB0036385                       | Methyl 4-phenylbutanoate                             | C11H14O2  | 177.0922971 | No  |
| 1368 | HMDB0037680                       | 2-Methylphenyl 2-methylpropanoate                    | C11H14O2  | 177.0922971 | No  |
| 1368 | HMDB0037708                       | p-Tolyl isobutyrate                                  | C11H14O2  | 177.0922971 | No  |
| 1368 | HMDB0038179                       | 3-(2-Hydroxy-4-methylphenyl)-2-butanone              | C11H14O2  | 177.0922971 | No  |
| 1368 | HMDB0040287                       | 1-Phenylethyl propanoate                             | C11H14O2  | 177.0922971 | No  |
| 1368 | HMDB0040356                       | Osmorhizole                                          | C11H14O2  | 177.0922971 | No  |
| 1368 | HMDB0040411                       | Ethyl 3-phenylpropanoate                             | C11H14O2  | 177.0922971 | No  |
| 1368 | HMDB0040425                       | Propyl phenylacetate                                 | C11H14O2  | 177.0922971 | No  |
| 1368 | HMDB0040426                       | Isopropyl phenylacetate                              | C11H14O2  | 177.0922971 | No  |



|      |                                   |                                                     |           |             |     |
|------|-----------------------------------|-----------------------------------------------------|-----------|-------------|-----|
| 1368 | HMDB0040583; CHEBI:87500          | 2-Methylpropyl benzoate                             | C11H14O2  | 177.0922971 | No  |
| 1368 | HMDB0040800                       | 2-Ethoxy-5-(1-propenyl)phenol                       | C11H14O2  | 177.0922971 | No  |
| 1368 | HMDB0041553; C10478; CHEBI:50550  | Methylisoeugenol                                    | C11H14O2  | 177.0922971 | No  |
| 1368 | HMDB0126149                       | 2-(3-methylbut-2-en-1-yl)benzene-1,3-diol           | C11H14O2  | 177.0922971 | No  |
| 1368 | HMDB0126449                       | 2-[(1E)-3-methylbut-1-en-1-yl]benzene-1,3-diol      | C11H14O2  | 177.0922971 | No  |
| 1368 | HMDB0132981                       | 1-(4-hydroxyphenyl)pentan-3-one                     | C11H14O2  | 177.0922971 | No  |
| 1368 | HMDB0133181                       | 4-(3-methylbut-2-en-1-yl)benzene-1,3-diol           | C11H14O2  | 177.0922971 | No  |
| 1368 | HMDB0133469                       | 4-(3-methoxyphenyl)butan-2-one                      | C11H14O2  | 177.0922971 | No  |
| 1368 | HMDB0133682                       | 3-hydroxy-3-methyl-4-phenylbutan-2-one              | C11H14O2  | 177.0922971 | No  |
| 1368 | HMDB0133683                       | 4-hydroxy-3-methyl-4-phenylbutan-2-one              | C11H14O2  | 177.0922971 | No  |
| 1368 | HMDB0133684                       | 4-(3-hydroxyphenyl)-3-methylbutan-2-one             | C11H14O2  | 177.0922971 | No  |
| 1368 | HMDB0133685                       | 4-(4-hydroxyphenyl)-3-methylbutan-2-one             | C11H14O2  | 177.0922971 | No  |
| 1368 | HMDB0133686                       | 3-benzyl-4-hydroxybutan-2-one                       | C11H14O2  | 177.0922971 | No  |
| 1368 | HMDB0133687                       | 1-hydroxy-3-methyl-4-phenylbutan-2-one              | C11H14O2  | 177.0922971 | No  |
| 1369 | HMDB0001240; CHEBI:37753          | Pseudooxynicotine                                   | C10H14N2O | 177.1033552 | No  |
| 1369 | HMDB0001329                       | 2''-Hydroxynicotine                                 | C10H14N2O | 177.1033552 | No  |
| 1369 | HMDB0001497; CHEBI:30734          | Nicotine-1''-N-oxide                                | C10H14N2O | 177.1033552 | No  |
| 1369 | HMDB0060679; C16569; CHEBI:357241 | Glycinexylidide                                     | C10H14N2O | 177.1033552 | No  |
| 1370 | HMDB0014956; CHEBI:44915          | Propofol                                            | C12H18O   | 177.1285908 | No  |
| 1370 | HMDB0031194                       | Tricycloekasantal                                   | C12H18O   | 177.1285908 | No  |
| 1370 | HMDB0031568                       | 4-Methyl-1-phenyl-2-pentanol                        | C12H18O   | 177.1285908 | No  |
| 1370 | HMDB0031731                       | 3-Methyl-1-phenyl-3-pentanol                        | C12H18O   | 177.1285908 | No  |
| 1370 | HMDB0032579                       | 2,5-Diisopropylphenol                               | C12H18O   | 177.1285908 | No  |
| 1370 | HMDB0035055                       | 11-Methyl-7-oxatetracyclo[6.3.1.01,6.04,11]dodecane | C12H18O   | 177.1285908 | No  |
| 1370 | HMDB0036681                       | 7-Isopropyl-5-methylbicyclo[2.2.2]oct-5-en-2-one    | C12H18O   | 177.1285908 | No  |
| 1370 | HMDB0037272                       | 2-Ethoxy-1-methyl-4-(1-methylethyl)benzene          | C12H18O   | 177.1285908 | No  |
| 1370 | HMDB0038107                       | Quinceoxepine                                       | C12H18O   | 177.1285908 | No  |
| 1370 | HMDB0038194                       | Geijerone                                           | C12H18O   | 177.1285908 | No  |
| 1381 | HMDB0029415; CHEBI:971853         | S-Carboxymethyl-L-cysteine                          | C5H9NO4S  | 178.0183496 | No  |
| 1383 | HMDB0032581                       | 1-(Isothiocyanatomethyl)-4-methoxybenzene           | C9H9NOS   | 178.0321148 | No  |
| 1384 | HMDB0000714; C01586; CHEBI:18089  | Hippuric acid                                       | C9H9NO3   | 178.05085   | Yes |
| 1384 | HMDB0000992; C19569; CHEBI:66951  | 3-Succinoylpyridine                                 | C9H9NO3   | 178.05085   | Yes |
| 1384 | HMDB0012884; CHEBI:838058         | Adrenochrome                                        | C9H9NO3   | 178.05085   | Yes |
| 1384 | HMDB0032398                       | Methyl n-formylanthranilate                         | C9H9NO3   | 178.05085   | Yes |
| 1384 | HMDB0032595                       | 1-(4-Methoxyphenyl)-2-nitroethylene                 | C9H9NO3   | 178.05085   | Yes |
| 1390 | HMDB0014621; C07236; CHEBI:193858 | Rimantadine                                         | C12H21N   | 178.1610713 | Yes |
| 1390 | HMDB0015177; C13736; CHEBI:64312  | Memantine                                           | C12H21N   | 178.1610713 | Yes |
| 1426 | HMDB0031671                       | 2,4,6-Trimethyl-1,3,5-trithiane                     | C6H12S3   | 179.0033758 | No  |
| 1426 | HMDB0032115                       | 1-(Methylthio)ethyl 2-propenyl disulfide            | C6H12S3   | 179.0033758 | No  |
| 1431 | HMDB0001087; C03089; CHEBI:16895  | 5-Methylthioribose                                  | C6H12O4S  | 179.0370916 | Yes |
| 1432 | HMDB0003269; C05380; CHEBI:7563   | Nicotinuric acid                                    | C8H8N2O3  | 179.0464806 | Yes |
| 1432 | HMDB0041912; C16623; CHEBI:80617  | Isonicotinylglycine                                 | C8H8N2O3  | 179.0464806 | Yes |
| 1432 | HMDB0059766; CHEBI:467315         | Picolinoylglycine                                   | C8H8N2O3  | 179.0464806 | Yes |
| 1433 | HMDB0000122; C00031; CHEBI:4167   | D-Glucose                                           | C6H12O6   | 179.0570607 | No  |
| 1433 | HMDB0000143; C00984; CHEBI:28061  | D-Galactose                                         | C6H12O6   | 179.0570607 | No  |
| 1433 | HMDB0000169; C00159; CHEBI:4208   | D-Mannose                                           | C6H12O6   | 179.0570607 | No  |
| 1433 | HMDB0000211; C00137; CHEBI:17268  | myo-Inositol                                        | C6H12O6   | 179.0570607 | No  |
| 1433 | HMDB0000346                       | 3-Deoxyarabinohexonic acid                          | C6H12O6   | 179.0570607 | No  |
| 1433 | HMDB0000516; C00221; CHEBI:15903  | Beta-D-Glucose                                      | C6H12O6   | 179.0570607 | No  |
| 1433 | HMDB0000660; C02336; CHEBI:28645  | D-Fructose                                          | C6H12O6   | 179.0570607 | No  |
| 1433 | HMDB0001151; C01487; CHEBI:37741  | Allose                                              | C6H12O6   | 179.0570607 | No  |
| 1433 | HMDB0001266; C00247; CHEBI:10295  | L-Sorbose                                           | C6H12O6   | 179.0570607 | No  |
| 1433 | HMDB0001860; C13747; CHEBI:25858  | Paraxanthine                                        | C7H8N4O2  | 179.0570607 | No  |
| 1433 | HMDB0001889; C07130; CHEBI:28177  | Theophylline                                        | C7H8N4O2  | 179.0570607 | No  |
| 1433 | HMDB0002825; C07480; CHEBI:28946  | Theobromine                                         | C7H8N4O2  | 179.0570607 | No  |
| 1433 | HMDB0003345; C00267; CHEBI:17925  | Alpha-D-Glucose                                     | C6H12O6   | 179.0570607 | No  |
| 1433 | HMDB0003418; C00795; CHEBI:47693  | D-Tagatose                                          | C6H12O6   | 179.0570607 | No  |
| 1433 | HMDB0003449; C00962; CHEBI:27667  | Beta-D-Galactose                                    | C6H12O6   | 179.0570607 | No  |
| 1433 | HMDB0006088; C06153; CHEBI:10642  | scyllo-Inositol                                     | C6H12O6   | 179.0570607 | No  |
| 1433 | HMDB0012326; C15923; CHEBI:37704  | L-Gulose                                            | C6H12O6   | 179.0570607 | No  |
| 1433 | HMDB0032222                       | Dihydroxyacetone (dimer)                            | C6H12O6   | 179.0570607 | No  |

|      |                                   |                                                      |           |             |     |
|------|-----------------------------------|------------------------------------------------------|-----------|-------------|-----|
| 1433 | HMDB0033704; C01825; CHEBI:37619  | L-Galactose                                          | C6H12O6   | 179.0570607 | No  |
| 1433 | HMDB0034220; C06151; CHEBI:27374  | Levoinositol                                         | C6H12O6   | 179.0570607 | No  |
| 1433 | HMDB0061922; CHEBI:37744          | Alpha-D-Glucopyranoside                              | C6H12O6   | 179.0570607 | No  |
| 1433 | HMDB0062138; C06152; CHEBI:27987  | muco-Inositol                                        | C6H12O6   | 179.0570607 | No  |
| 1433 | HMDB0062170; C00738               | D-Glucopyranoside                                    | C6H12O6   | 179.0570607 | No  |
| 1433 | HMDB0062202; CHEBI:40656          | 3(S)-hydroxy-all-cis-8,11,14,17-eicosatetraenoyl-CoA | C6H12O6   | 179.0570607 | No  |
| 1433 | HMDB0062473; CHEBI:37675          | Glycoprotein-phospho-D-mannose                       | C6H12O6   | 179.0570607 | No  |
| 1433 | HMDB0062538; C10906; CHEBI:48095  | Fructose-1P                                          | C6H12O6   | 179.0570607 | No  |
| 1433 | HMDB0125599                       | 2,5-bis(hydroxymethyl)oxolane-2,3,4-triol            | C6H12O6   | 179.0570607 | No  |
| 1433 | HMDB0240207; CHEBI:23927          | epi-Inositol                                         | C6H12O6   | 179.0570607 | No  |
| 1433 | HMDB0240208; CHEBI:25492          | neo-inositol                                         | C6H12O6   | 179.0570607 | No  |
| 1433 | HMDB0240209; C06150; CHEBI:27372  | D-chiro-inositol                                     | C6H12O6   | 179.0570607 | No  |
| 1433 | HMDB0240210; CHEBI:23311          | cis-inositol                                         | C6H12O6   | 179.0570607 | No  |
| 1433 | HMDB0240211; CHEBI:22357          | allo-inositol                                        | C6H12O6   | 179.0570607 | No  |
| 1437 | HMDB0031181                       | Homodihydrojasmane                                   | C12H20O   | 179.1442642 | No  |
| 1437 | HMDB0032531                       | 2-trans-6-cis-Dodecadienal                           | C12H20O   | 179.1442642 | No  |
| 1437 | HMDB0038108                       | cis-Quinceoxepane                                    | C12H20O   | 179.1442642 | No  |
| 1437 | HMDB0039339                       | Tricycloekasantalol                                  | C12H20O   | 179.1442642 | No  |
| 1437 | HMDB0039590                       | (2E,4E)-2,4-Dodecadienal                             | C12H20O   | 179.1442642 | No  |
| 1450 | HMDB0006954; C06050               | 2-Methyl-3-hydroxy-5-formylpyridine-4-carboxylate    | C8H7NO4   | 180.0293523 | Yes |
| 1450 | HMDB0033733; C15770; CHEBI:63558  | 2,4-Dihydroxy-2H-1,4-benzoxazin-3(4H)-one            | C8H7NO4   | 180.0293523 | Yes |
| 1450 | HMDB0038054                       | (R)-2,7-Dihydroxy-2H-1,4-benzoxazin-3(4H)-one        | C8H7NO4   | 180.0293523 | Yes |
| 1452 | HMDB0000158; C00082; CHEBI:17895  | L-Tyrosine                                           | C9H11NO3  | 180.0663265 | No  |
| 1452 | HMDB0001119; C19579               | 4-Hydroxy-4-(3-pyridyl)-butanoic acid                | C9H11NO3  | 180.0663265 | No  |
| 1452 | HMDB0002184                       | L-Threo-3-Phenylserine                               | C9H11NO3  | 180.0663265 | No  |
| 1452 | HMDB0003831; C04368; CHEBI:16939  | Beta-Tyrosine                                        | C9H11NO3  | 180.0663265 | No  |
| 1452 | HMDB0006050; CHEBI:278475         | o-Tyrosine                                           | C9H11NO3  | 180.0663265 | No  |
| 1452 | HMDB0059720; CHEBI:44303          | Meta-Tyrosine                                        | C9H11NO3  | 180.0663265 | No  |
| 1452 | HMDB0060280                       | 4,6,7-Trihydroxy-1,2,3,4-tetrahydroisoquinoline      | C9H11NO3  | 180.0663265 | No  |
| 1456 | HMDB0033868                       | beta-O-Methyl-nephthrine                             | C10H15NO2 | 180.1030481 | No  |
| 1456 | HMDB0035195                       | cis-6-Nitro-p-mentha-1(7),2-diene                    | C10H15NO2 | 180.1030481 | No  |
| 1456 | HMDB0036090                       | (R)-2-Nitro-p-mentha-1,5-diene                       | C10H15NO2 | 180.1030481 | No  |
| 1456 | HMDB0039784                       | 2,5-Dimethyl-4-(1-pyrrolidinyl)-3(2H)-furanone       | C10H15NO2 | 180.1030481 | No  |
| 1456 | HMDB0039838                       | 2-(5-Methyl-2-furanyl)-3-piperidinol                 | C10H15NO2 | 180.1030481 | No  |
| 1456 | HMDB0040038                       | 5-(1-Pyrrolidinylmethyl)-2-furanmethanol             | C10H15NO2 | 180.1030481 | No  |
| 1456 | HMDB0041806; CHEBI:136995         | 3,4-Dimethoxyphenylethylamine                        | C10H15NO2 | 180.1030481 | No  |
| 1456 | HMDB0060748                       | 3-O-Methyl-a-methyldopamine                          | C10H15NO2 | 180.1030481 | No  |
| 1466 | HMDB0032825                       | Dipropyl trisulfide                                  | C6H14S3   | 181.0180501 | Yes |
| 1466 | HMDB0033055                       | Ethyl 1-(ethylthio)ethyl disulfide                   | C6H14S3   | 181.0180501 | Yes |
| 1466 | HMDB0039654                       | Ethyl 1-(methylthio)propyl disulfide                 | C6H14S3   | 181.0180501 | Yes |
| 1466 | HMDB0040235                       | 1,1''-Thiobis-1-propanethiol                         | C6H14S3   | 181.0180501 | Yes |
| 1466 | HMDB0126547                       | [(oxolan-2-yl)methoxy]sulfonic acid                  | C5H10O5S  | 181.0180501 | Yes |
| 1467 | HMDB0001970; CHEBI:149031         | 3-Methyluric acid                                    | C6H6N4O3  | 181.0368939 | Yes |
| 1467 | HMDB0001973                       | 9-Methyluric acid                                    | C6H6N4O3  | 181.0368939 | Yes |
| 1467 | HMDB0003099; C16359; CHEBI:149558 | 1-Methyluric acid                                    | C6H6N4O3  | 181.0368939 | Yes |
| 1467 | HMDB0011107; C16355; CHEBI:149744 | 7-Methyluric acid                                    | C6H6N4O3  | 181.0368939 | Yes |
| 1468 | HMDB0000118; C05582; CHEBI:545959 | Homovanillic acid                                    | C9H10O4   | 181.0502237 | Yes |
| 1468 | HMDB0000333; CHEBI:823536         | Isohomovanillic acid                                 | C9H10O4   | 181.0502237 | Yes |
| 1468 | HMDB0000423; C10447; CHEBI:48400  | 3,4-Dihydroxyhydrocinnamic acid                      | C9H10O4   | 181.0502237 | Yes |
| 1468 | HMDB0000755; C03672; CHEBI:17385  | Hydroxyphenyllactic acid                             | C9H10O4   | 181.0502237 | Yes |
| 1468 | HMDB0002643; CHEBI:86369          | 3-(3-Hydroxyphenyl)-3-hydroxypropanoic acid          | C9H10O4   | 181.0502237 | Yes |
| 1468 | HMDB0004061; C05583               | 3-Methoxy-4-hydroxyphenylglycolaldehyde              | C9H10O4   | 181.0502237 | Yes |
| 1468 | HMDB0029232                       | 3-Hydroxyphenyllactate                               | C9H10O4   | 181.0502237 | Yes |
| 1468 | HMDB0029273; CHEBI:545935         | 2,6-Dimethoxybenzoic acid                            | C9H10O4   | 181.0502237 | Yes |
| 1468 | HMDB0029646; C10680; CHEBI:562351 | 2'',6''-Dihydroxy-4''-methoxyacetophenone            | C9H10O4   | 181.0502237 | Yes |
| 1468 | HMDB0033624                       | (±)-2-Hydroxy-3-(2-hydroxyphenyl)propanoic acid      | C9H10O4   | 181.0502237 | Yes |
| 1468 | HMDB0037274                       | Maltol propionate                                    | C9H10O4   | 181.0502237 | Yes |
| 1468 | HMDB0041270                       | 2'',4''-Dihydroxy-6''-methoxyacetophenone            | C9H10O4   | 181.0502237 | Yes |
| 1468 | HMDB0059763; CHEBI:296881         | 3,4-Dimethoxybenzoic acid                            | C9H10O4   | 181.0502237 | Yes |
| 1468 | HMDB0062595; CHEBI:78336          | Meta-hydroxyphenylhydracrylic Acid                   | C9H10O4   | 181.0502237 | Yes |
| 1468 | HMDB0124923                       | 3-hydroxy-3-(4-hydroxyphenyl)propanoic acid          | C9H10O4   | 181.0502237 | Yes |

|      |                                  |                                                     |           |             |     |
|------|----------------------------------|-----------------------------------------------------|-----------|-------------|-----|
| 1468 | HMDB0125533                      | 3-(3,5-dihydroxyphenyl)propanoic acid               | C9H10O4   | 181.0502237 | Yes |
| 1468 | HMDB0125591                      | 4-ethenyl-6-methoxybenzene-1,2,3-triol              | C9H10O4   | 181.0502237 | Yes |
| 1468 | HMDB0125595                      | 5-ethenyl-3-methoxybenzene-1,2,4-triol              | C9H10O4   | 181.0502237 | Yes |
| 1468 | HMDB0126386                      | 3-(2,4-dihydroxyphenyl)propanoic acid               | C9H10O4   | 181.0502237 | Yes |
| 1468 | HMDB0127495                      | 3,5-dimethoxybenzoic acid                           | C9H10O4   | 181.0502237 | Yes |
| 1468 | HMDB0129348                      | 2-(3,4-dihydroxyphenyl)propanoic acid               | C9H10O4   | 181.0502237 | Yes |
| 1468 | HMDB0131428                      | 2-(3-hydroxy-5-methoxyphenyl)acetic acid            | C9H10O4   | 181.0502237 | Yes |
| 1468 | HMDB0133494                      | 2-hydroxy-2-(3-methoxyphenyl)acetic acid            | C9H10O4   | 181.0502237 | Yes |
| 1468 | HMDB0133788                      | 2-(2,4-dihydroxyphenyl)propanoic acid               | C9H10O4   | 181.0502237 | Yes |
| 1468 | HMDB0134042                      | 3-(2,3-dihydroxyphenyl)propanoic acid               | C9H10O4   | 181.0502237 | Yes |
| 1468 | HMDB0134043                      | 3-(2,5-dihydroxyphenyl)propanoic acid               | C9H10O4   | 181.0502237 | Yes |
| 1468 | HMDB0140294                      | 2-hydroxy-2-(4-methoxyphenyl)acetic acid            | C9H10O4   | 181.0502237 | Yes |
| 1468 | HMDB0140892                      | 2-hydroxy-3-(3-hydroxyphenyl)propanoic acid         | C9H10O4   | 181.0502237 | Yes |
| 1469 | HMDB0000107; C01697; CHEBI:16813 | Galactitol                                          | C6H14O6   | 181.0720257 | Yes |
| 1469 | HMDB0000247; C00794; CHEBI:17924 | Sorbitol                                            | C6H14O6   | 181.0720257 | Yes |
| 1469 | HMDB0000765; C00392; CHEBI:16899 | Mannitol                                            | C6H14O6   | 181.0720257 | Yes |
| 1469 | HMDB0011632; C01507; CHEBI:18202 | L-Iditol                                            | C6H14O6   | 181.0720257 | Yes |
| 1483 | HMDB0029723; C12283; CHEBI:32111 | Saccharin                                           | C7H5NO3S  | 181.9918506 | No  |
| 1484 | HMDB0062578; CHEBI:994           | Cis,cis-2-amino-3-(3-oxoprop-1-enyl)but-2-enedioate | C7H5NO5   | 182.0070258 | Yes |
| 1486 | HMDB0000017; C00847; CHEBI:17405 | 4-Pyridoxic acid                                    | C8H9NO4   | 182.046045  | Yes |
| 1546 | HMDB0015435                      | Polystyrene sulfonate                               | C8H8O3S   | 183.0116641 | No  |
| 1553 | HMDB0036117                      | (1''R)-Nepetalic acid                               | C10H16O3  | 183.1027614 | No  |
| 1553 | HMDB0036998                      | (S)-Oleuropeic acid                                 | C10H16O3  | 183.1027614 | No  |
| 1553 | HMDB0039052                      | (4S,8R)-8,9-Dihydroxy-p-menth-1(6)-en-2-one         | C10H16O3  | 183.1027614 | No  |
| 1553 | HMDB0039710                      | 1-Acetylcyclohexyl acetate                          | C10H16O3  | 183.1027614 | No  |
| 1553 | HMDB0040883                      | (E)-10-Oxo-8-decenoic acid                          | C10H16O3  | 183.1027614 | No  |
| 1554 | HMDB0061384; CHEBI:133185        | N-(3-acetamidopropyl)pyrrolidin-2-one               | C9H16N2O2 | 183.1138862 | Yes |
| 1555 | HMDB0031062                      | (Z)-3-Methyl-3-decenoic acid                        | C11H20O2  | 183.1392619 | No  |
| 1555 | HMDB0031063                      | (Z)-3-Methyl-4-decenoic acid                        | C11H20O2  | 183.1392619 | No  |
| 1555 | HMDB0031087                      | trans-2-Hexyl-1-cyclopropaneacetic acid             | C11H20O2  | 183.1392619 | No  |
| 1555 | HMDB0031272                      | Ethyl (E)-2-nonenolate                              | C11H20O2  | 183.1392619 | No  |
| 1555 | HMDB0031406                      | Ethyl 3-cyclohexylpropionate                        | C11H20O2  | 183.1392619 | No  |
| 1555 | HMDB0031691                      | cis-3-Hexenyl pentanoate                            | C11H20O2  | 183.1392619 | No  |
| 1555 | HMDB0031843                      | 2,3-Undecanedione                                   | C11H20O2  | 183.1392619 | No  |
| 1555 | HMDB0032308; CHEBI:48944         | (E)-3-Heptenyl 2-methylpropanoate                   | C11H20O2  | 183.1392619 | No  |
| 1555 | HMDB0032320                      | 3-Hexenyl 2-methylbutyrate                          | C11H20O2  | 183.1392619 | No  |
| 1555 | HMDB0032396                      | Methyl 2-decenoate                                  | C11H20O2  | 183.1392619 | No  |
| 1555 | HMDB0032404                      | 6-Methyl-5-hepten-2-one propyleneglycol acetal      | C11H20O2  | 183.1392619 | No  |
| 1555 | HMDB0032453                      | cis-3-Octenyl propionate                            | C11H20O2  | 183.1392619 | No  |
| 1555 | HMDB0032461                      | Pent-2-enyl hexanoate                               | C11H20O2  | 183.1392619 | No  |
| 1555 | HMDB0032489; C13422; CHEBI:31676 | Prenyl caproate                                     | C11H20O2  | 183.1392619 | No  |
| 1555 | HMDB0032534                      | trans-2-Hexenyl 2-methylbutyrate                    | C11H20O2  | 183.1392619 | No  |
| 1555 | HMDB0033371; C12295              | Citronellyl formate                                 | C11H20O2  | 183.1392619 | No  |
| 1555 | HMDB0033724; C13910; CHEBI:35045 | Undecylenic acid                                    | C11H20O2  | 183.1392619 | No  |
| 1555 | HMDB0034428                      | Cyclohexyl 3-methylbutanoate                        | C11H20O2  | 183.1392619 | No  |
| 1555 | HMDB0034429                      | Cyclohexyl pentanoate                               | C11H20O2  | 183.1392619 | No  |
| 1555 | HMDB0036140                      | 5-Hexyldihydro-5-methyl-2(3H)-furanone              | C11H20O2  | 183.1392619 | No  |
| 1555 | HMDB0036784                      | 6-Hexyltetrahydro-2H-pyran-2-one                    | C11H20O2  | 183.1392619 | No  |
| 1555 | HMDB0037106                      | (x)-1-Nonen-3-yl acetate                            | C11H20O2  | 183.1392619 | No  |
| 1555 | HMDB0037185                      | Rhodinyl formate                                    | C11H20O2  | 183.1392619 | No  |
| 1555 | HMDB0037225                      | Methyl citronellate                                 | C11H20O2  | 183.1392619 | No  |
| 1555 | HMDB0037309                      | 5-Hexyldihydro-4-methyl-2(3H)-furanone              | C11H20O2  | 183.1392619 | No  |
| 1555 | HMDB0038273                      | 2-Hexenyl valerate                                  | C11H20O2  | 183.1392619 | No  |
| 1555 | HMDB0038274                      | 2-Hexenyl isovalerate                               | C11H20O2  | 183.1392619 | No  |
| 1555 | HMDB0038277                      | cis-3-Hexenyl 2-methylbutanoate                     | C11H20O2  | 183.1392619 | No  |
| 1555 | HMDB0038278                      | cis-3-Hexenyl 3-methylbutanoate                     | C11H20O2  | 183.1392619 | No  |
| 1555 | HMDB0038311                      | xi-gamma-Undecalactone                              | C11H20O2  | 183.1392619 | No  |
| 1555 | HMDB0038906                      | 5-Octenyl propanoate                                | C11H20O2  | 183.1392619 | No  |
| 1555 | HMDB0040593                      | 2-Propenyl octanoate                                | C11H20O2  | 183.1392619 | No  |
| 1556 | HMDB0031019; C14996              | 2-Dodecanone                                        | C12H24O   | 183.1751003 | No  |
| 1556 | HMDB0031734                      | 2-Methylundecanal                                   | C12H24O   | 183.1751003 | No  |

|      |                                   |                                                        |            |             |     |
|------|-----------------------------------|--------------------------------------------------------|------------|-------------|-----|
| 1556 | HMDB0032543                       | (+/-)-2,4,8-Trimethyl-7-nonen-2-ol                     | C12H24O    | 183.1751003 | No  |
| 1556 | HMDB0033933; C02278; CHEBI:27836  | Lauric aldehyde                                        | C12H24O    | 183.1751003 | No  |
| 1566 | HMDB0032986                       | 5-(2-Hydroxyethyl)-4-methylthiazole acetate            | C8H11NO2S  | 184.043744  | No  |
| 1569 | HMDB0034912                       | (5)-N-(4,5-Dihydro-1-methyl-4-oxo-1H-imidazol-2-yl)alk | C7H11N3O3  | 184.0728841 | No  |
| 1572 | HMDB0006348; C12449               | Pseudoecgonine                                         | C9H15NO3   | 184.097919  | Yes |
| 1572 | HMDB0006548; C10858; CHEBI:708641 | Ecgonine                                               | C9H15NO3   | 184.097919  | Yes |
| 1572 | HMDB0094728                       | 2-Hepteneoylglycine                                    | C9H15NO3   | 184.097919  | Yes |
| 1572 | HMDB0094729                       | 3-Hepteneoylglycine                                    | C9H15NO3   | 184.097919  | Yes |
| 1572 | HMDB0094730                       | 4-Hepteneoylglycine                                    | C9H15NO3   | 184.097919  | Yes |
| 1572 | HMDB0094731                       | 5-Hepteneoylglycine                                    | C9H15NO3   | 184.097919  | Yes |
| 1589 | HMDB0060371; CHEBI:1506           | 3-Fumarylpyruvate                                      | C7H6O6     | 185.0101898 | No  |
| 1589 | HMDB0125352                       | 2,3,4,5-tetrahydroxybenzoic acid                       | C7H6O6     | 185.0101898 | No  |
| 1589 | HMDB0130404                       | 2,3,4,6-tetrahydroxybenzoic acid                       | C7H6O6     | 185.0101898 | No  |
| 1592 | HMDB0014533; C07615; CHEBI:617099 | Carbimazole                                            | C7H10N2O2S | 185.041108  | No  |
| 1594 | HMDB0061890                       | Pyroglutamylglycine                                    | C7H10N2O4  | 185.0570881 | Yes |
| 1595 | HMDB0032708; C13014; CHEBI:32918  | 1-Naphthaleneacetic acid                               | C12H10O2   | 185.0608235 | No  |
| 1597 | HMDB0040973                       | 1-Methoxy-1H-indole-3-acetonitrile                     | C11H10N2O  | 185.072205  | No  |
| 1598 | HMDB0030988                       | 5-(2-Methylpropyl)tetrahydro-2-oxo-3-furancarboxylic   | C9H14O4    | 185.0821905 | No  |
| 1598 | HMDB0030992                       | 5-Butyltetrahydro-2-oxo-3-furancarboxylic acid         | C9H14O4    | 185.0821905 | No  |
| 1599 | HMDB0028695                       | Alanyl-Proline                                         | C8H14N2O3  | 185.0931636 | No  |
| 1599 | HMDB0029010                       | Prolyl-Alanine                                         | C8H14N2O3  | 185.0931636 | No  |
| 1600 | HMDB0032205                       | cis- and trans-L-Mercapto-p-menthan-3-one              | C10H18OS   | 185.1008661 | No  |
| 1600 | HMDB0037385                       | 8-Mercapto-p-menthan-3-one                             | C10H18OS   | 185.1008661 | No  |
| 1601 | HMDB0010724; CHEBI:37157          | 3-Oxodecanoic acid                                     | C10H18O3   | 185.1181884 | Yes |
| 1601 | HMDB0030367                       | Ethyl (3R,5Z)-3-hydroxy-5-octenoate                    | C10H18O3   | 185.1181884 | Yes |
| 1601 | HMDB0030369                       | 3-Hydroxy-5Z-octenyl acetate                           | C10H18O3   | 185.1181884 | Yes |
| 1601 | HMDB0033010                       | (1S,2S,4S,5R)-1,8-Epoxy-p-menthane-2,5-diol            | C10H18O3   | 185.1181884 | Yes |
| 1601 | HMDB0038692                       | 6-Methyl-2-methylene-6-octene-1,3,8-triol              | C10H18O3   | 185.1181884 | Yes |
| 1601 | HMDB0038978                       | (1beta,2beta,5beta)-p-Menth-3-ene-1,2,5-triol          | C10H18O3   | 185.1181884 | Yes |
| 1601 | HMDB0039533                       | (E)-10-Hydroxy-8-decenoic acid                         | C10H18O3   | 185.1181884 | Yes |
| 1601 | HMDB0039582                       | 6-Hexyl-1,4-dioxan-2-one                               | C10H18O3   | 185.1181884 | Yes |
| 1601 | HMDB0039587                       | 5-Hexyl-1,4-dioxan-2-one                               | C10H18O3   | 185.1181884 | Yes |
| 1601 | HMDB0040204                       | 2-Methylbutyl 3-hydroxy-2-methylidenebutanoate         | C10H18O3   | 185.1181884 | Yes |
| 1601 | HMDB0040205                       | 3-Methylbutyl 3-hydroxy-2-methylidenebutanoate         | C10H18O3   | 185.1181884 | Yes |
| 1601 | HMDB0041376; C17620               | exo,exo-1,8-Epoxy-p-menthane-2,6-diol                  | C10H18O3   | 185.1181884 | Yes |
| 1601 | HMDB0041545                       | (1R,2R,4R)-1,8-Epoxy-p-menthane-2,4-diol               | C10H18O3   | 185.1181884 | Yes |
| 1602 | HMDB0000947; C17715; CHEBI:32368  | Undecanoic acid                                        | C11H22O2   | 185.1546103 | No  |
| 1602 | HMDB0002373; CHEBI:63864          | 4,6-Dimethylnonanoic acid                              | C11H22O2   | 185.1546103 | No  |
| 1602 | HMDB0032044                       | Hexyl 3-methylbutanoate                                | C11H22O2   | 185.1546103 | No  |
| 1602 | HMDB0032325                       | 2-Hexyl-4,5-dimethyl-1,3-dioxolane                     | C11H22O2   | 185.1546103 | No  |
| 1602 | HMDB0032448                       | Octanal propyleneglycol acetal                         | C11H22O2   | 185.1546103 | No  |
| 1602 | HMDB0033618; CHEBI:87542          | 3-Methylbutyl hexanoate                                | C11H22O2   | 185.1546103 | No  |
| 1602 | HMDB0033848                       | Methyl decanoate                                       | C11H22O2   | 185.1546103 | No  |
| 1602 | HMDB0034134                       | Octyl propanoate                                       | C11H22O2   | 185.1546103 | No  |
| 1602 | HMDB0034456                       | 9-Methyldecanoic acid                                  | C11H22O2   | 185.1546103 | No  |
| 1602 | HMDB0034458                       | Isobutyl enanthate                                     | C11H22O2   | 185.1546103 | No  |
| 1602 | HMDB0034460                       | Heptyl butanoate                                       | C11H22O2   | 185.1546103 | No  |
| 1602 | HMDB0036034                       | 6,6-Dimethoxy-2,5,5-trimethyl-2-hexene                 | C11H22O2   | 185.1546103 | No  |
| 1602 | HMDB0036229                       | Pentyl hexanoate                                       | C11H22O2   | 185.1546103 | No  |
| 1602 | HMDB0038237                       | xi-8-Methyldecanoic acid                               | C11H22O2   | 185.1546103 | No  |
| 1602 | HMDB0038267                       | 7,7-Diethoxy-3-heptene                                 | C11H22O2   | 185.1546103 | No  |
| 1602 | HMDB0039215                       | Hexyl 2-methylbutanoate                                | C11H22O2   | 185.1546103 | No  |
| 1602 | HMDB0040171                       | Heptyl 2-methylpropanoate                              | C11H22O2   | 185.1546103 | No  |
| 1602 | HMDB0040193; CHEBI:87501          | Ethyl nonanoate                                        | C11H22O2   | 185.1546103 | No  |
| 1602 | HMDB0040266; CHEBI:87511          | Nonyl acetate                                          | C11H22O2   | 185.1546103 | No  |
| 1602 | HMDB0041559                       | Butyl heptanoate                                       | C11H22O2   | 185.1546103 | No  |
| 1602 | HMDB0059831; CHEBI:87374          | Propyl octanoate                                       | C11H22O2   | 185.1546103 | No  |
| 1602 | HMDB0059860                       | 2-Methylbutyl hexanoate                                | C11H22O2   | 185.1546103 | No  |
| 1602 | HMDB0062119                       | Hexyl valerate                                         | C11H22O2   | 185.1546103 | No  |
| 1602 | HMDB0094659                       | 1,1-Dimethylethyl heptanoic acid                       | C11H22O2   | 185.1546103 | No  |
| 1615 | HMDB0031700                       | 1-(Malonylamino)cyclopropanecarboxylic acid            | C7H9NO5    | 186.0423935 | No  |

|      |                                      |                                                           |            |             |     |
|------|--------------------------------------|-----------------------------------------------------------|------------|-------------|-----|
| 1616 | HMDB0000734; CHEBI:90333             | Indoleacrylic acid                                        | C11H9NO2   | 186.0554719 | No  |
| 1618 | HMDB0012150; C05548                  | 2-Keto-6-acetamidocaproate                                | C8H13NO4   | 186.077088  | No  |
| 1621 | HMDB0013010; CHEBI:74433             | N-Heptanoylglycine                                        | C9H17NO3   | 186.1135618 | No  |
| 1621 | HMDB0037790; C01092; CHEBI:15830     | Polyethylene glycol                                       | C9H17NO3   | 186.1135618 | No  |
| 1623 | HMDB0001276; C00612; CHEBI:17927     | N1-Acetylspermidine                                       | C9H21N3O   | 186.1610855 | No  |
| 1623 | HMDB0002189; C01029; CHEBI:27911     | N8-Acetylspermidine                                       | C9H21N3O   | 186.1610855 | No  |
| 1623 | HMDB0060288                          | N(8)-Acetylspermidinium                                   | C9H21N3O   | 186.1610855 | No  |
| 1630 | HMDB0011635; CHEBI:82914             | p-Cresol sulfate                                          | C7H8O4S    | 187.0075585 | No  |
| 1630 | HMDB0034782                          | Benzyl sulfate                                            | C7H8O4S    | 187.0075585 | No  |
| 1632 | HMDB0000784; C08261; CHEBI:48131     | Azelaic acid                                              | C9H16O4    | 187.0981662 | No  |
| 1632 | HMDB0011717; CHEBI:88404             | Nonate                                                    | C9H16O4    | 187.0981662 | No  |
| 1632 | HMDB0032200                          | cis- and trans-Ethyl 2,4-dimethyl-1,3-dioxolane-2-acetate | C9H16O4    | 187.0981662 | No  |
| 1632 | HMDB0032258                          | (+/-)-Ethyl 3-acetoxy-2-methylbutyrate                    | C9H16O4    | 187.0981662 | No  |
| 1632 | HMDB0032387                          | (+/-)-Methyl 5-acetoxyhexanoate                           | C9H16O4    | 187.0981662 | No  |
| 1632 | HMDB0036233                          | Butyl ethyl malonate                                      | C9H16O4    | 187.0981662 | No  |
| 1632 | HMDB0059760; CHEBI:89874             | 2,4-Dimethylpimelic acid                                  | C9H16O4    | 187.0981662 | No  |
| 1632 | HMDB0059783                          | 3-Methylsuberic acid                                      | C9H16O4    | 187.0981662 | No  |
| 1632 | HMDB0059814                          | Diethyl methylsuccinate                                   | C9H16O4    | 187.0981662 | No  |
| 1632 | HMDB0059879; CHEBI:87319             | Diethyl glutarate                                         | C9H16O4    | 187.0981662 | No  |
| 1633 | HMDB0000670; C01924; CHEBI:27747     | Homo-L-arginine                                           | C7H16N4O2  | 187.1193102 | No  |
| 1633 | HMDB0029416; C03884; CHEBI:28229     | L-Targinine                                               | C7H16N4O2  | 187.1193102 | No  |
| 1651 | HMDB0004823                          | Lanthionine ketimine                                      | C6H7NO4S   | 188.0029798 | Yes |
| 1651 | HMDB0061116; CHEBI:133186            | 2-aminophenol sulphate                                    | C6H7NO4S   | 188.0029798 | Yes |
| 1653 | HMDB0000590                          | Glutarylglutamine                                         | C7H11NO5   | 188.0564266 | No  |
| 1653 | HMDB0001138; C00624; CHEBI:12575     | N-Acetylglutamic acid                                     | C7H11NO5   | 188.0564266 | No  |
| 1653 | HMDB0031574                          | 1-Isothiocyanato-6-(methylthio)hexane                     | C8H15NS2   | 188.0564266 | No  |
| 1653 | HMDB0032499                          | Pyrrolidino-[1,2E]-4H-2,4-dimethyl-1,3,5-dithiazine       | C8H15NS2   | 188.0564266 | No  |
| 1656 | HMDB0036604                          | N-Methylcalystegine B2                                    | C8H15NO4   | 188.092977  | Yes |
| 1656 | HMDB0062181                          | N-lactoyl-Valine                                          | C8H15NO4   | 188.092977  | Yes |
| 1656 | HMDB0094718                          | 1-hydroxyhexanoylglycine                                  | C8H15NO4   | 188.092977  | Yes |
| 1656 | HMDB0094719                          | 2-hydroxyhexanoylglycine                                  | C8H15NO4   | 188.092977  | Yes |
| 1656 | HMDB0094720                          | 3-hydroxyhexanoylglycine                                  | C8H15NO4   | 188.092977  | Yes |
| 1656 | HMDB0094721                          | 4-hydroxyhexanoylglycine                                  | C8H15NO4   | 188.092977  | Yes |
| 1656 | HMDB0094722                          | 5-hydroxyhexanoylglycine                                  | C8H15NO4   | 188.092977  | Yes |
| 1665 | HMDB0059724; HMDB0061713; CHEBI:6850 | Pyrocatechol sulfate                                      | C6H6O5S    | 188.9866147 | Yes |
| 1666 | HMDB0061120                          | 3-Hydroxy-4-aminopyridine sulfate                         | C5H6N2O4S  | 188.9984844 | Yes |
| 1669 | HMDB0032944                          | Coumarin-4-carboxylic acid                                | C10H6O4    | 189.0199539 | No  |
| 1669 | HMDB0039045                          | 8H-1,3-Dioxolo[4,5-h][1]benzopyran-8-one                  | C10H6O4    | 189.0199539 | No  |
| 1669 | HMDB0039147                          | 6-Formylumbelliferone                                     | C10H6O4    | 189.0199539 | No  |
| 1669 | HMDB0128616                          | 1-oxo-1H-isochromene-3-carboxylic acid                    | C10H6O4    | 189.0199539 | No  |
| 1669 | HMDB0128617                          | 7-hydroxy-1-oxo-1H-isochromene-3-carbaldehyde             | C10H6O4    | 189.0199539 | No  |
| 1669 | HMDB0128618                          | 6-hydroxy-1-oxo-1H-isochromene-3-carbaldehyde             | C10H6O4    | 189.0199539 | No  |
| 1669 | HMDB0128619                          | 5-hydroxy-1-oxo-1H-isochromene-3-carbaldehyde             | C10H6O4    | 189.0199539 | No  |
| 1670 | HMDB0012710; C00944; CHEBI:17947     | 3-Dehydroquinate                                          | C7H10O6    | 189.0407561 | Yes |
| 1670 | HMDB0037815                          | 5-(Methylthio)-2-[(methylthio)methyl]-2-pentenal          | C8H14OS2   | 189.0407561 | Yes |
| 1670 | HMDB0059927                          | 2-Hydroxy-2-(2-oxopropyl)butanedioic acid                 | C7H10O6    | 189.0407561 | Yes |
| 1672 | HMDB0032991                          | 7-Methoxy-6-methyl-2H-1-benzopyran-2-one                  | C11H10O3   | 189.055174  | Yes |
| 1672 | HMDB0039359                          | Methyl (Z,Z)-10-hydroxy-2,8-decadiene-4,6-diynoate        | C11H10O3   | 189.055174  | Yes |
| 1672 | HMDB0040326                          | 7-Hydroxy-2,5-dimethyl-4H-1-benzopyran-4-one              | C11H10O3   | 189.055174  | Yes |
| 1672 | HMDB0040731                          | Avenalumic acid                                           | C11H10O3   | 189.055174  | Yes |
| 1672 | HMDB0040938; C17916; CHEBI:81379     | Coixinden A                                               | C11H10O3   | 189.055174  | Yes |
| 1672 | HMDB0041122                          | (S)-2,3-Dihydro-5-hydroxy-2-methyl-1,4-naphthoquinone     | C11H10O3   | 189.055174  | Yes |
| 1672 | HMDB0129361                          | 1-(4-methoxy-1-benzofuran-5-yl)ethan-1-one                | C11H10O3   | 189.055174  | Yes |
| 1673 | HMDB0031173; CHEBI:563250            | 6-Hydroxy-1H-indole-3-acetamide                           | C10H10N2O2 | 189.0673558 | Yes |
| 1674 | HMDB0000325; CHEBI:70766             | 3-Hydroxysuberic acid                                     | C8H14O5    | 189.0769549 | Yes |
| 1674 | HMDB0040220; CHEBI:53781             | Diethyl L-malate                                          | C8H14O5    | 189.0769549 | Yes |
| 1674 | HMDB0061681; CHEBI:84086             | 6-(2-Hydroxyethoxy)-6-oxohexanoic acid                    | C8H14O5    | 189.0769549 | Yes |
| 1676 | HMDB0001370; C00666; CHEBI:16026     | Diaminopimelic acid                                       | C7H14N2O4  | 189.0880342 | Yes |
| 1676 | HMDB0028697                          | Alanyl-Threonine                                          | C7H14N2O4  | 189.0880342 | Yes |
| 1676 | HMDB0029054                          | Threoninyl-Alanine                                        | C7H14N2O4  | 189.0880342 | Yes |
| 1676 | HMDB0031412                          | 2-Amino-4-[(2-hydroxy-1-oxopropyl)amino]butanoic acid     | C7H14N2O4  | 189.0880342 | Yes |

|      |                                  |                                                                 |            |             |     |
|------|----------------------------------|-----------------------------------------------------------------|------------|-------------|-----|
| 1676 | HMDB0039222                      | N-(gamma-Glutamyl)ethanolamine                                  | C7H14N2O4  | 189.0880342 | Yes |
| 1677 | HMDB0030905                      | 1-(4-Methoxyphenyl)-1-penten-3-one                              | C12H14O2   | 189.0922696 | Yes |
| 1677 | HMDB0032027                      | 3-(2-Methylpropylidene)-3alpha,4-dihydro-1(3H)-isobenzofuranone | C12H14O2   | 189.0922696 | Yes |
| 1677 | HMDB0032064; C17854              | (S)-3-Butyl-1(3H)-isobenzofuranone                              | C12H14O2   | 189.0922696 | Yes |
| 1677 | HMDB0032177                      | Benzyl trans-2-methyl-2-butenolate                              | C12H14O2   | 189.0922696 | Yes |
| 1677 | HMDB0032488; C03885              | Prenyl benzoate                                                 | C12H14O2   | 189.0922696 | Yes |
| 1677 | HMDB0033033                      | (R)-3,7-Dimethyl-5-indanecarboxylic acid                        | C12H14O2   | 189.0922696 | Yes |
| 1677 | HMDB0034277                      | Ligustilide                                                     | C12H14O2   | 189.0922696 | Yes |
| 1677 | HMDB0037627                      | Benzyl tiglate                                                  | C12H14O2   | 189.0922696 | Yes |
| 1677 | HMDB0037700; C06360              | Propyl cinnamate                                                | C12H14O2   | 189.0922696 | Yes |
| 1677 | HMDB0037701                      | Isopropyl cinnamate                                             | C12H14O2   | 189.0922696 | Yes |
| 1677 | HMDB0041315                      | Cinnamyl propionate                                             | C12H14O2   | 189.0922696 | Yes |
| 1677 | HMDB0132934                      | 1-(4-hydroxyphenyl)-4-methylpent-1-en-3-one                     | C12H14O2   | 189.0922696 | Yes |
| 1677 | HMDB0132983                      | 5-(4-methoxyphenyl)pent-1-en-3-one                              | C12H14O2   | 189.0922696 | Yes |
| 1678 | HMDB0032346                      | (+/-)-Isobutyl 3-methylthiobutyrate                             | C9H18O2S   | 189.0957142 | Yes |
| 1678 | HMDB0032372                      | 3-Mercaptoheptyl acetate                                        | C9H18O2S   | 189.0957142 | Yes |
| 1678 | HMDB0032427                      | (S)-3-Methylthiohexyl acetate                                   | C9H18O2S   | 189.0957142 | Yes |
| 1680 | HMDB0013804; CHEBI:67251         | beta-Damascenone                                                | C13H18O    | 189.1289504 | No  |
| 1680 | HMDB0036178                      | 2-(3-Phenylpropyl)tetrahydrofuran                               | C13H18O    | 189.1289504 | No  |
| 1680 | HMDB0036572                      | 3,5,8-Megastigmatrien-7-one                                     | C13H18O    | 189.1289504 | No  |
| 1680 | HMDB0036685                      | 2,2,6,7-Tetramethylbicyclo[4.3.0]nona-1(9),4-dien-8-one         | C13H18O    | 189.1289504 | No  |
| 1680 | HMDB0037763                      | xi-3-(4-Isopropylphenyl)-2-methylpropanal                       | C13H18O    | 189.1289504 | No  |
| 1680 | HMDB0059904                      | dehydro-beta-Ionone                                             | C13H18O    | 189.1289504 | No  |
| 1680 | HMDB0059906                      | Megastigmatrienone                                              | C13H18O    | 189.1289504 | No  |
| 1692 | HMDB0062803; CHEBI:57441         | 2,3-diketogulonate                                              | C6H7O7     | 190.0115737 | Yes |
| 1695 | HMDB0000763; C05635; CHEBI:27823 | 5-Hydroxyindoleacetic acid                                      | C10H9NO3   | 190.0510752 | Yes |
| 1695 | HMDB0035514; CHEBI:133221        | xi-2,3-Dihydro-2-oxo-1H-indole-3-acetic acid                    | C10H9NO3   | 190.0510752 | Yes |
| 1695 | HMDB0060400; C16596; CHEBI:80594 | 5-Phenyl-1,3-oxazinane-2,4-dione                                | C10H9NO3   | 190.0510752 | Yes |
| 1696 | HMDB0031346                      | Calystegine C1                                                  | C7H13NO5   | 190.071495  | Yes |
| 1696 | HMDB0038443                      | 1-Isothiocyanato-4-phenylbutane                                 | C11H13NS   | 190.071495  | Yes |
| 1696 | HMDB0040031                      | 2-Butylbenzothiazole                                            | C11H13NS   | 190.071495  | Yes |
| 1696 | HMDB0040332                      | Dihydro-6-isopropyl-2,4-dimethyl-4H-1,3,5-dithiazine            | C8H17NS2   | 190.071495  | Yes |
| 1696 | HMDB0040333                      | Dihydro-4,6-dimethyl-2-(1-methylethyl)-4H-1,3,5-dithiazine      | C8H17NS2   | 190.071495  | Yes |
| 1698 | HMDB0001896; CHEBI:114833        | 5-Methoxytryptophol                                             | C11H13NO2  | 190.0875977 | No  |
| 1698 | HMDB0033560                      | (E)-5-(3,4,5,6-Tetrahydro-3-pyridylidenemethyl)-2-furaldehyde   | C11H13NO2  | 190.0875977 | No  |
| 1715 | HMDB0000094; C00158; CHEBI:30769 | Citric acid                                                     | C6H8O7     | 191.0200273 | Yes |
| 1715 | HMDB0000193; C00311; CHEBI:30887 | Isocitric acid                                                  | C6H8O7     | 191.0200273 | Yes |
| 1715 | HMDB0001874; C00451; CHEBI:151   | D-threo-Isocitric acid                                          | C6H8O7     | 191.0200273 | Yes |
| 1715 | HMDB0005971; C04575; CHEBI:15622 | Diketogulonic acid                                              | C6H8O7     | 191.0200273 | Yes |
| 1715 | HMDB0006511; C04575; CHEBI:15622 | 2,3-Diketo-L-gulonate                                           | C6H8O7     | 191.0200273 | Yes |
| 1715 | HMDB0033717; C04617; CHEBI:160   | (1R,2R)-Isocitric acid                                          | C6H8O7     | 191.0200273 | Yes |
| 1715 | HMDB0041862; CHEBI:85805         | D-Glucaro-1,4-lactone                                           | C6H8O7     | 191.0200273 | Yes |
| 1716 | HMDB0003072; C06746; CHEBI:17521 | Quinic acid                                                     | C7H12O6    | 191.0561831 | No  |
| 1718 | HMDB0001004                      | Oxoamide                                                        | C10H12N2O2 | 191.0821315 | No  |
| 1718 | HMDB0001324                      | N"-Hydroxymethylnorcotine                                       | C10H12N2O2 | 191.0821315 | No  |
| 1718 | HMDB0001390                      | Hydroxycotinine                                                 | C10H12N2O2 | 191.0821315 | No  |
| 1718 | HMDB0001411; CHEBI:89087         | Cotinine N-oxide                                                | C10H12N2O2 | 191.0821315 | No  |
| 1718 | HMDB0001427                      | 5"-Hydroxycotinine                                              | C10H12N2O2 | 191.0821315 | No  |
| 1719 | HMDB0031710                      | 1,9-Nonanedithiol                                               | C9H20S2    | 191.0926413 | Yes |
| 1720 | HMDB0031571                      | 2-Methyl-1-phenyl-2-propanyl acetate                            | C12H16O2   | 191.1077627 | No  |
| 1720 | HMDB0031614                      | 4-Phenyl-2-butyl acetate                                        | C12H16O2   | 191.1077627 | No  |
| 1720 | HMDB0031618                      | Ethyl 4-phenylbutanoate                                         | C12H16O2   | 191.1077627 | No  |
| 1720 | HMDB0032043                      | Benzyl 3-methylbutanoate                                        | C12H16O2   | 191.1077627 | No  |
| 1720 | HMDB0033380                      | 3-Methylbutyl benzoate                                          | C12H16O2   | 191.1077627 | No  |
| 1720 | HMDB0035010                      | 2-Methylpropyl phenylacetate                                    | C12H16O2   | 191.1077627 | No  |
| 1720 | HMDB0035014; CHEBI:87413         | 2-Phenylethyl butanoate                                         | C12H16O2   | 191.1077627 | No  |
| 1720 | HMDB0035015; CHEBI:87409         | 2-Phenylethyl 2-methylpropanoate                                | C12H16O2   | 191.1077627 | No  |
| 1720 | HMDB0035447                      | 5-Isopropyl-2-methylphenol acetate                              | C12H16O2   | 191.1077627 | No  |
| 1720 | HMDB0036388                      | 3-Phenylpropyl propanoate                                       | C12H16O2   | 191.1077627 | No  |
| 1720 | HMDB0036734                      | 11,12,13-Trinor-1(10)-spirovetivene-2,7-dione                   | C12H16O2   | 191.1077627 | No  |
| 1720 | HMDB0037165                      | 4-Methyl-2-(1-phenylethyl)-1,3-dioxolane, 9CI                   | C12H16O2   | 191.1077627 | No  |

|      |                                   |                                                       |           |             |     |
|------|-----------------------------------|-------------------------------------------------------|-----------|-------------|-----|
| 1720 | HMDB0037709                       | 4-Methylphenyl 3-methylbutanoate                      | C12H16O2  | 191.1077627 | No  |
| 1720 | HMDB0037716                       | 1-Phenylethyl isobutyrate                             | C12H16O2  | 191.1077627 | No  |
| 1720 | HMDB0037717                       | 1-Phenylethyl butyrate                                | C12H16O2  | 191.1077627 | No  |
| 1720 | HMDB0037792                       | 1-Ethoxy-2-methoxy-4-(1-propenyl)benzene              | C12H16O2  | 191.1077627 | No  |
| 1720 | HMDB0038180                       | 2-(2-Hydroxy-4-methylphenyl)-3-pentanone              | C12H16O2  | 191.1077627 | No  |
| 1720 | HMDB0039496                       | 2-Ethoxy-1-methoxy-4-(1-propenyl)benzene              | C12H16O2  | 191.1077627 | No  |
| 1720 | HMDB0039643                       | 11,12,13-Trinor-1,3,5-bisabolatrien-10-oic acid       | C12H16O2  | 191.1077627 | No  |
| 1720 | HMDB0039841                       | 2-Benzyl-4,5-dimethyl-1,3-dioxolane                   | C12H16O2  | 191.1077627 | No  |
| 1720 | HMDB0040427                       | Butyl phenylacetate                                   | C12H16O2  | 191.1077627 | No  |
| 1720 | HMDB0132942                       | 1-(4-hydroxyphenyl)-4-methylpentan-3-one              | C12H16O2  | 191.1077627 | No  |
| 1720 | HMDB0132971                       | 1-(4-methoxyphenyl)pentan-3-one                       | C12H16O2  | 191.1077627 | No  |
| 1720 | HMDB0132979                       | (1E)-1-(4-methoxyphenyl)pent-1-en-3-ol                | C12H16O2  | 191.1077627 | No  |
| 1739 | HMDB0000821; C05598; CHEBI:27480  | Phenylacetyl glycine                                  | C10H11NO3 | 192.0664338 | Yes |
| 1739 | HMDB0000859; CHEBI:468391         | Methyl hippurate                                      | C10H11NO3 | 192.0664338 | Yes |
| 1739 | HMDB0011723; C01586; CHEBI:613303 | 2-Methylhippuric acid                                 | C10H11NO3 | 192.0664338 | Yes |
| 1739 | HMDB0013245; CHEBI:613449         | m-Methylhippuric acid                                 | C10H11NO3 | 192.0664338 | Yes |
| 1739 | HMDB0013292; CHEBI:103973         | p-Methylhippuric acid                                 | C10H11NO3 | 192.0664338 | Yes |
| 1739 | HMDB0032388; C06332; CHEBI:16803  | Methyl n-acetylanthranilate                           | C10H11NO3 | 192.0664338 | Yes |
| 1739 | HMDB0034250                       | Betamipron                                            | C10H11NO3 | 192.0664338 | Yes |
| 1739 | HMDB0060366; C16587; CHEBI:80586  | 3-Carbamoyl-2-phenylpropionaldehyde                   | C10H11NO3 | 192.0664338 | Yes |
| 1739 | HMDB0060389; C16595               | 4-Hydroxy-5-phenyltetrahydro-1,3-oxazin-2-one         | C10H11NO3 | 192.0664338 | Yes |
| 1739 | HMDB0060758                       | 4-Anilino-4-oxobutanoic acid                          | C10H11NO3 | 192.0664338 | Yes |
| 1743 | HMDB0003626; CHEBI:88955          | (R)-N-Methylsalsolinol                                | C11H15NO2 | 192.1026161 | No  |
| 1743 | HMDB0003892                       | (S)-N-Methylsalsolinol                                | C11H15NO2 | 192.1026161 | No  |
| 1743 | HMDB0012469; C09640; CHEBI:761542 | (-)-Salsoline                                         | C11H15NO2 | 192.1026161 | No  |
| 1743 | HMDB0012484                       | (R)-1,2-dimethyl-5,6-dihydroxy-tetrahydroisoquinoline | C11H15NO2 | 192.1026161 | No  |
| 1743 | HMDB0031797; C18418; CHEBI:38505  | 2-Isopropylphenyl methylcarbamate                     | C11H15NO2 | 192.1026161 | No  |
| 1743 | HMDB0035072                       | 2-Methylpropyl 2-aminobenzoate                        | C11H15NO2 | 192.1026161 | No  |
| 1743 | HMDB0036906; CHEBI:86192          | Butyl 2-aminobenzoate                                 | C11H15NO2 | 192.1026161 | No  |
| 1743 | HMDB0037698                       | Ethyl N-ethylanthranilate                             | C11H15NO2 | 192.1026161 | No  |
| 1761 | HMDB0000127; C00191; CHEBI:42717  | D-Glucuronic acid                                     | C6H10O7   | 193.035759  | Yes |
| 1761 | HMDB0002545; C08348; CHEBI:47962  | Galacturonic acid                                     | C6H10O7   | 193.035759  | Yes |
| 1761 | HMDB0002704; C06472; CHEBI:24769  | Iduronic acid                                         | C6H10O7   | 193.035759  | Yes |
| 1761 | HMDB0003363; C00470; CHEBI:33885  | Pectic acid                                           | C6H10O7   | 193.035759  | Yes |
| 1761 | HMDB0003402; C08348; CHEBI:47954  | Pectin                                                | C6H10O7   | 193.035759  | Yes |
| 1761 | HMDB0006334; C00618; CHEBI:16142  | 3-Dehydro-L-gulonate                                  | C6H10O7   | 193.035759  | Yes |
| 1761 | HMDB0011731; C01062               | 5-Keto-D-gluconate                                    | C6H10O7   | 193.035759  | Yes |
| 1761 | HMDB0011732; C15673               | 2-Keto-L-gluconate                                    | C6H10O7   | 193.035759  | Yes |
| 1761 | HMDB0033245                       | 6-(Hydroxymethyl)-2,4(1H,3H)-pteridinedione           | C7H6N4O3  | 193.035759  | Yes |
| 1761 | HMDB0038491                       | L-Altruronic acid                                     | C6H10O7   | 193.035759  | Yes |
| 1761 | HMDB0127846                       | 3,4,5,6-tetrahydroxyoxane-2-carboxylic acid           | C6H10O7   | 193.035759  | Yes |
| 1762 | HMDB0000954; C01494; CHEBI:17620  | trans-Ferulic acid                                    | C10H10O4  | 193.050635  | No  |
| 1762 | HMDB0000955; C10470; CHEBI:493263 | Isoferulic acid                                       | C10H10O4  | 193.050635  | No  |
| 1762 | HMDB0002120; CHEBI:70973          | Monoethyl phthalate                                   | C10H10O4  | 193.050635  | No  |
| 1762 | HMDB0029663; CHEBI:86956          | Vanillin acetate                                      | C10H10O4  | 193.050635  | No  |
| 1762 | HMDB0030765                       | (-)-trans-3,4-Dihydro-4,8-dihydroxy-3-methyl-1H-2-ber | C10H10O4  | 193.050635  | No  |
| 1762 | HMDB0032614                       | Piperonyl acetate                                     | C10H10O4  | 193.050635  | No  |
| 1762 | HMDB0032652                       | Meconine                                              | C10H10O4  | 193.050635  | No  |
| 1762 | HMDB0037644                       | 3-(2-Hydroxy-3-methoxyphenyl)-2-propenoic acid        | C10H10O4  | 193.050635  | No  |
| 1762 | HMDB0039606                       | Repandiol                                             | C10H10O4  | 193.050635  | No  |
| 1762 | HMDB0059721; CHEBI:84093          | mono-Benzyl malonate                                  | C10H10O4  | 193.050635  | No  |
| 1762 | HMDB0061686; CHEBI:84089          | 2,5-Dihydroxycinnamic acid methyl ester               | C10H10O4  | 193.050635  | No  |
| 1762 | HMDB0125096                       | 3-(4-hydroxy-3-methoxyphenyl)prop-2-enoic acid        | C10H10O4  | 193.050635  | No  |
| 1762 | HMDB0125524                       | (2E)-3-(3-hydroxy-5-methoxyphenyl)prop-2-enoic acid   | C10H10O4  | 193.050635  | No  |
| 1762 | HMDB0125588                       | 3-(3-hydroxy-5-methoxyphenyl)prop-2-enoic acid        | C10H10O4  | 193.050635  | No  |
| 1762 | HMDB0127500                       | 3-(4-methoxyphenyl)-2-oxopropanoic acid               | C10H10O4  | 193.050635  | No  |
| 1762 | HMDB0131137                       | 3-(3-hydroxy-4-methoxyphenyl)prop-2-enoic acid        | C10H10O4  | 193.050635  | No  |
| 1762 | HMDB0131171                       | (2Z)-2-hydroxy-3-(4-methoxyphenyl)prop-2-enoic acid   | C10H10O4  | 193.050635  | No  |
| 1762 | HMDB0131172                       | (2E)-3-(2-hydroxy-4-methoxyphenyl)prop-2-enoic acid   | C10H10O4  | 193.050635  | No  |
| 1762 | HMDB0131173                       | 3-(4-methoxyphenyl)oxirane-2-carboxylic acid          | C10H10O4  | 193.050635  | No  |
| 1762 | HMDB0134088                       | 3-(2-hydroxy-3-methoxyphenyl)prop-2-enoic acid        | C10H10O4  | 193.050635  | No  |

|      |                                  |                                                     |           |             |     |
|------|----------------------------------|-----------------------------------------------------|-----------|-------------|-----|
| 1762 | HMDB0135741                      | 3-(2-hydroxy-4-methoxyphenyl)prop-2-enoic acid      | C10H10O4  | 193.050635  | No  |
| 1762 | HMDB0137510                      | 3-(4-hydroxy-2-methoxyphenyl)prop-2-enoic acid      | C10H10O4  | 193.050635  | No  |
| 1762 | HMDB0140957                      | (2E)-3-(3-hydroxy-2-methoxyphenyl)prop-2-enoic acid | C10H10O4  | 193.050635  | No  |
| 1762 | HMDB0141263                      | (2Z)-2-hydroxy-3-(3-methoxyphenyl)prop-2-enoic acid | C10H10O4  | 193.050635  | No  |
| 1762 | HMDB0141265                      | 3-(3-methoxyphenyl)-2-oxopropanoic acid             | C10H10O4  | 193.050635  | No  |
| 1762 | HMDB0142175                      | 2-benzylpropanedioic acid                           | C10H10O4  | 193.050635  | No  |
| 1763 | HMDB0001867; CHEBI:104011        | 4-Aminohippuric acid                                | C9H10N2O3 | 193.0617684 | Yes |
| 1763 | HMDB0059723; CHEBI:68456         | Pyridylacetylglycine                                | C9H10N2O3 | 193.0617684 | Yes |
| 1764 | HMDB0029915; C06352; CHEBI:18266 | D-4-O-Methyl-myo-inositol                           | C7H14O6   | 193.0706163 | No  |
| 1764 | HMDB0029916; C06353; CHEBI:28762 | 4-O-Methyl-myo-inositol                             | C7H14O6   | 193.0706163 | No  |
| 1764 | HMDB0029965; CHEBI:113524        | Methyl beta-D-glucopyranoside                       | C7H14O6   | 193.0706163 | No  |
| 1764 | HMDB0031437; C03659; CHEBI:18427 | (-)-Bornesitol                                      | C7H14O6   | 193.0706163 | No  |
| 1764 | HMDB0031449; C03365; CHEBI:15975 | Sequoyitol                                          | C7H14O6   | 193.0706163 | No  |
| 1764 | HMDB0033816                      | Mytilitol                                           | C7H14O6   | 193.0706163 | No  |
| 1764 | HMDB0034219; C03844; CHEBI:28548 | D-Pinitol                                           | C7H14O6   | 193.0706163 | No  |
| 1764 | HMDB0034221; C08257; CHEBI:111   | L-Quebrachitol                                      | C7H14O6   | 193.0706163 | No  |
| 1764 | HMDB0034222; CHEBI:37209         | L-Pinitol                                           | C7H14O6   | 193.0706163 | No  |
| 1764 | HMDB0037295                      | 3-[(2-Mercapto-1-methylpropyl)thio]-2-butanol       | C8H18OS2  | 193.0706163 | No  |
| 1764 | HMDB0062564                      | 1D-5-O-methyl-chiro-inositol                        | C7H14O6   | 193.0706163 | No  |
| 1768 | HMDB0014018                      | 4-Hydroxypropofol                                   | C12H18O2  | 193.1233721 | No  |
| 1768 | HMDB0031840                      | (S,Z)-Lyratol acetate                               | C12H18O2  | 193.1233721 | No  |
| 1768 | HMDB0032567                      | Hexylresorcinol                                     | C12H18O2  | 193.1233721 | No  |
| 1768 | HMDB0034450; C17002              | Neocnidilide                                        | C12H18O2  | 193.1233721 | No  |
| 1768 | HMDB0035126                      | (±)-Myrtenyl acetate                                | C12H18O2  | 193.1233721 | No  |
| 1768 | HMDB0035375                      | Ethyl (2E,4E,7Z)-Decatrienoate                      | C12H18O2  | 193.1233721 | No  |
| 1768 | HMDB0035376                      | Ethyl (2E,4Z,7Z)-Decatrienoate                      | C12H18O2  | 193.1233721 | No  |
| 1768 | HMDB0035801                      | (2S,4R)-p-Mentha-1(7),5-dien-2-ol acetate           | C12H18O2  | 193.1233721 | No  |
| 1768 | HMDB0037018                      | (S)-p-Mentha-1,8-dien-10-yl acetate                 | C12H18O2  | 193.1233721 | No  |
| 1768 | HMDB0037231                      | Perillyl acetate                                    | C12H18O2  | 193.1233721 | No  |
| 1768 | HMDB0037389                      | (R)-2-Acetoxy-p-mentha-1,8-diene                    | C12H18O2  | 193.1233721 | No  |
| 1768 | HMDB0038046                      | Carvyl acetate                                      | C12H18O2  | 193.1233721 | No  |
| 1768 | HMDB0038292                      | Menthadienyl acetate                                | C12H18O2  | 193.1233721 | No  |
| 1768 | HMDB0039685                      | 8-Ocimenyl acetate                                  | C12H18O2  | 193.1233721 | No  |
| 1768 | HMDB0040439                      | 1-(2-Furanyl)-1-octanone                            | C12H18O2  | 193.1233721 | No  |
| 1768 | HMDB0041497                      | (S)-Neolyratyl acetate                              | C12H18O2  | 193.1233721 | No  |
| 1768 | HMDB0041610                      | (2,2-Diethoxyethyl)benzene                          | C12H18O2  | 193.1233721 | No  |
| 1768 | HMDB0132986                      | 1-(4-methoxyphenyl)pentan-3-ol                      | C12H18O2  | 193.1233721 | No  |
| 1783 | HMDB0000840; C07588; CHEBI:9008  | Salicyluric acid                                    | C9H9NO4   | 194.0460029 | No  |
| 1783 | HMDB0001229; C00822; CHEBI:16852 | Dopaquinone                                         | C9H9NO4   | 194.0460029 | No  |
| 1783 | HMDB0002016; CHEBI:242989        | 4-Carboxyphenylglycine                              | C9H9NO4   | 194.0460029 | No  |
| 1783 | HMDB0002404; CHEBI:68451         | Alpha-Hydroxyhippuric acid                          | C9H9NO4   | 194.0460029 | No  |
| 1783 | HMDB0004067; C05604; CHEBI:60872 | Leucodopachrome                                     | C9H9NO4   | 194.0460029 | No  |
| 1783 | HMDB0006116; CHEBI:594277        | 3-Hydroxyhippuric acid                              | C9H9NO4   | 194.0460029 | No  |
| 1783 | HMDB0013678; CHEBI:613375        | 4-Hydroxyhippuric acid                              | C9H9NO4   | 194.0460029 | No  |
| 1783 | HMDB0030726                      | 2-Hydroxy-6,7-dimethoxybenzoxazole                  | C9H9NO4   | 194.0460029 | No  |
| 1783 | HMDB0038055                      | 2-Hydroxy-7-methoxy-2H-1,4-benzoxazin-3(4H)-one     | C9H9NO4   | 194.0460029 | No  |
| 1783 | HMDB0039119                      | L-Dopaquinone                                       | C9H9NO4   | 194.0460029 | No  |
| 1783 | HMDB0060602                      | N-acetyl-5-aminosalicylic acid                      | C9H9NO4   | 194.0460029 | No  |
| 1784 | HMDB0029743; CHEBI:749489        | 9H-Carbazole-3-carboxaldehyde                       | C13H9NO   | 194.0617238 | No  |
| 1786 | HMDB0060953                      | 2-hydroxymexiletine                                 | C11H17NO2 | 194.1187908 | Yes |
| 1786 | HMDB0060954                      | p-hydroxymexiletine                                 | C11H17NO2 | 194.1187908 | Yes |
| 1840 | HMDB0128930                      | 3-methyl-4-(sulfooxy)but-2-enoic acid               | C5H8O6S   | 194.9967849 | Yes |
| 1840 | HMDB0129117                      | (2Z)-2-[(sulfooxy)methyl]but-2-enoic acid           | C5H8O6S   | 194.9967849 | Yes |
| 1840 | HMDB0129120                      | 2-methyl-4-(sulfooxy)but-2-enoic acid               | C5H8O6S   | 194.9967849 | Yes |
| 1842 | HMDB0030800                      | 3-Methoxy-4,5-methylenedioxybenzoic acid            | C9H8O5    | 195.0321552 | Yes |
| 1842 | HMDB0033044                      | 1-(Methylthio)propyl propyl disulfide               | C7H16S3   | 195.0321552 | Yes |
| 1842 | HMDB0033045                      | Ethyl 1-(ethylthio)propyl disulfide                 | C7H16S3   | 195.0321552 | Yes |
| 1842 | HMDB0059809; CHEBI:89654         | 4-Hydroxy-benzenepropanedioate                      | C9H8O5    | 195.0321552 | Yes |
| 1842 | HMDB0125373                      | 3-(3,4-dihydroxyphenyl)-2-oxopropanoic acid         | C9H8O5    | 195.0321552 | Yes |
| 1842 | HMDB0125523                      | (2E)-3-(3,4,5-trihydroxyphenyl)prop-2-enoic acid    | C9H8O5    | 195.0321552 | Yes |
| 1842 | HMDB0125584                      | 3-(3,4,5-trihydroxyphenyl)prop-2-enoic acid         | C9H8O5    | 195.0321552 | Yes |



|      |                                    |                                                  |           |             |     |
|------|------------------------------------|--------------------------------------------------|-----------|-------------|-----|
| 1842 | HMDB0126031                        | (2E)-3-(2,3,4-trihydroxyphenyl)prop-2-enoic acid | C9H8O5    | 195.0321552 | Yes |
| 1842 | HMDB0126041                        | (2E)-3-(2,4,5-trihydroxyphenyl)prop-2-enoic acid | C9H8O5    | 195.0321552 | Yes |
| 1842 | HMDB0131758                        | 3-(2,4-dihydroxyphenyl)-2-oxopropanoic acid      | C9H8O5    | 195.0321552 | Yes |
| 1842 | HMDB0132449                        | 3-(3,5-dihydroxyphenyl)-2-oxopropanoic acid      | C9H8O5    | 195.0321552 | Yes |
| 1842 | HMDB0132521                        | 3-(2,4,5-trihydroxyphenyl)prop-2-enoic acid      | C9H8O5    | 195.0321552 | Yes |
| 1842 | HMDB0137120                        | 2-(2-hydroxy-4-methoxyphenyl)-2-oxoacetic acid   | C9H8O5    | 195.0321552 | Yes |
| 1842 | HMDB0137166                        | 3-(2,3,4-trihydroxyphenyl)prop-2-enoic acid      | C9H8O5    | 195.0321552 | Yes |
| 1843 | HMDB0000565; C00880; CHEBI:16534   | Galactonic acid                                  | C6H12O7   | 195.0516488 | Yes |
| 1843 | HMDB0000625; C00257; CHEBI:33198   | Gluconic acid                                    | C6H12O7   | 195.0516488 | Yes |
| 1843 | HMDB0001857; CHEBI:149714          | 1,3-Dimethyluric acid                            | C7H8N4O3  | 195.0516488 | Yes |
| 1843 | HMDB0001982; CHEBI:149724          | 3,7-Dimethyluric acid                            | C7H8N4O3  | 195.0516488 | Yes |
| 1843 | HMDB0002026                        | 1,9-Dimethyluric acid                            | C7H8N4O3  | 195.0516488 | Yes |
| 1843 | HMDB0003290; C00800; CHEBI:16154   | Gulonic acid                                     | C6H12O7   | 195.0516488 | Yes |
| 1843 | HMDB0004308                        | 7,9-Dimethyluric acid                            | C7H8N4O3  | 195.0516488 | Yes |
| 1843 | HMDB0011103; CHEBI:149713          | 1,7-Dimethyluric acid                            | C7H8N4O3  | 195.0516488 | Yes |
| 1843 | HMDB0059704                        | 3,9-Dimethyluric acid                            | C7H8N4O3  | 195.0516488 | Yes |
| 1856 | HMDB0062692; CHEBI:57590           | O-phosphonato-L-homoserine(2-)                   | C4H8NO6P  | 196.0002313 | No  |
| 1861 | HMDB0033179                        | N-(4-hydroxyphenyl)ethoxycarbothioamide          | C9H11NO2S | 196.0441709 | No  |
| 1863 | HMDB0032055; C02997; CHEBI:16437   | N-Acetylhistidine                                | C8H11N3O3 | 196.0721764 | No  |
| 1864 | HMDB0033188; C14416                | 3-Amino-1-methyl-5H-pyrido[4,3-b]indole          | C12H11N3  | 196.0908217 | No  |
| 1865 | HMDB0004063; C05588; CHEBI:144365  | Metanephine                                      | C10H15NO3 | 196.0980113 | No  |
| 1865 | HMDB0036074; C08511                | Tenuazonic acid                                  | C10H15NO3 | 196.0980113 | No  |
| 1865 | HMDB0060558; CHEBI:73248           | Desglymidodrine                                  | C10H15NO3 | 196.0980113 | No  |
| 1865 | HMDB0062493; C05588; CHEBI:6270    | L-Metanephine                                    | C10H15NO3 | 196.0980113 | No  |
| 1865 | HMDB0094780                        | 1,2-octadienoylglycine                           | C10H15NO3 | 196.0980113 | No  |
| 1865 | HMDB0094781                        | 1,3-octadienoylglycine                           | C10H15NO3 | 196.0980113 | No  |
| 1865 | HMDB0094782                        | 1,4-octadienoylglycine                           | C10H15NO3 | 196.0980113 | No  |
| 1865 | HMDB0094783                        | 1,5-octadienoylglycine                           | C10H15NO3 | 196.0980113 | No  |
| 1865 | HMDB0094784                        | 1,6-octadienoylglycine                           | C10H15NO3 | 196.0980113 | No  |
| 1865 | HMDB0094785                        | 1,7-octadienoylglycine                           | C10H15NO3 | 196.0980113 | No  |
| 1865 | HMDB0094786                        | 2,3-octadienoylglycine                           | C10H15NO3 | 196.0980113 | No  |
| 1865 | HMDB0094787                        | 2,4-octadienoylglycine                           | C10H15NO3 | 196.0980113 | No  |
| 1865 | HMDB0094788                        | 2,5-octadienoylglycine                           | C10H15NO3 | 196.0980113 | No  |
| 1865 | HMDB0094789                        | 2,6-octadienoylglycine                           | C10H15NO3 | 196.0980113 | No  |
| 1865 | HMDB0094790                        | 2,7-octadienoylglycine                           | C10H15NO3 | 196.0980113 | No  |
| 1865 | HMDB0094791                        | 3,4-octadienoylglycine                           | C10H15NO3 | 196.0980113 | No  |
| 1865 | HMDB0094792                        | 3,5-octadienoylglycine                           | C10H15NO3 | 196.0980113 | No  |
| 1865 | HMDB0094793                        | 3,6-octadienoylglycine                           | C10H15NO3 | 196.0980113 | No  |
| 1865 | HMDB0094794                        | 3,7-octadienoylglycine                           | C10H15NO3 | 196.0980113 | No  |
| 1865 | HMDB0094795                        | 4,5-octadienoylglycine                           | C10H15NO3 | 196.0980113 | No  |
| 1865 | HMDB0094796                        | 4,6-octadienoylglycine                           | C10H15NO3 | 196.0980113 | No  |
| 1865 | HMDB0094797                        | 4,7-octadienoylglycine                           | C10H15NO3 | 196.0980113 | No  |
| 1865 | HMDB0094798                        | 5,6-octadienoylglycine                           | C10H15NO3 | 196.0980113 | No  |
| 1865 | HMDB0094799                        | 5,7-octadienoylglycine                           | C10H15NO3 | 196.0980113 | No  |
| 1865 | HMDB0094800                        | 6,7-octadienoylglycine                           | C10H15NO3 | 196.0980113 | No  |
| 1866 | HMDB0036173                        | 2-(3-Phenylpropyl)pyridine                       | C14H15N   | 196.1133142 | No  |
| 1876 | HMDB0040585                        | (±)-Sulfobutanedioic acid                        | C4H6O7S   | 196.9762045 | No  |
| 1878 | HMDB0062563; CHEBI:18034           | 4-fumarylacetoacetate(2-)                        | C8H6O6    | 197.0105506 | No  |
| 1878 | HMDB0130847                        | 2-[(sulfooxy)methyl]butanoic acid                | C5H10O6S  | 197.0105506 | No  |
| 1878 | HMDB0130850                        | 2-methyl-4-(sulfooxy)butanoic acid               | C5H10O6S  | 197.0105506 | No  |
| 1878 | HMDB0143265                        | 5-(sulfooxy)pentanoic acid                       | C5H10O6S  | 197.0105506 | No  |
| 1878 | HMDB0143268                        | 2-(sulfooxy)pentanoic acid                       | C5H10O6S  | 197.0105506 | No  |
| 1882 | HMDB0000291; C05584; CHEBI:1127735 | Vanillylmandelic acid                            | C9H10O5   | 197.0476993 | Yes |
| 1882 | HMDB0002085; C10833; CHEBI:454990  | Syringic acid                                    | C9H10O5   | 197.0476993 | Yes |
| 1882 | HMDB0003503; C01207; CHEBI:17807   | 3-(3,4-Dihydroxyphenyl)lactic acid               | C9H10O5   | 197.0476993 | Yes |
| 1882 | HMDB0029170                        | 3-Hydroxy-4-methoxymandelate                     | C9H10O5   | 197.0476993 | Yes |
| 1882 | HMDB0033836; CHEBI:87247           | Ethyl gallate                                    | C9H10O5   | 197.0476993 | Yes |
| 1882 | HMDB0041662                        | 3,4-O-Dimethylgallic acid                        | C9H10O5   | 197.0476993 | Yes |
| 1882 | HMDB0125024                        | 2-(2,4,5-trihydroxyphenyl)propanoic acid         | C9H10O5   | 197.0476993 | Yes |
| 1882 | HMDB0125529                        | 3-(3,4,5-trihydroxyphenyl)propanoic acid         | C9H10O5   | 197.0476993 | Yes |
| 1882 | HMDB0126478                        | 3-(2,4-dihydroxyphenyl)-3-hydroxypropanoic acid  | C9H10O5   | 197.0476993 | Yes |

|      |                                   |                                                        |            |             |     |
|------|-----------------------------------|--------------------------------------------------------|------------|-------------|-----|
| 1882 | HMDB0126489                       | 3-(2,4,5-trihydroxyphenyl)propanoic acid               | C9H10O5    | 197.0476993 | Yes |
| 1882 | HMDB0130476                       | 2-(2,5-dihydroxy-4-methoxyphenyl)acetic acid           | C9H10O5    | 197.0476993 | Yes |
| 1882 | HMDB0131426                       | 2-(3,4-dihydroxy-5-methoxyphenyl)acetic acid           | C9H10O5    | 197.0476993 | Yes |
| 1882 | HMDB0133489                       | 2-hydroxy-2-(4-hydroxy-3-methoxyphenyl)acetic acid     | C9H10O5    | 197.0476993 | Yes |
| 1882 | HMDB0137136                       | 2-hydroxy-2-(2-hydroxy-4-methoxyphenyl)acetic acid     | C9H10O5    | 197.0476993 | Yes |
| 1882 | HMDB0137823                       | 2-(2,3,4-trihydroxyphenyl)propanoic acid               | C9H10O5    | 197.0476993 | Yes |
| 1882 | HMDB0140947                       | 3-hydroxy-2,4-dimethoxybenzoic acid                    | C9H10O5    | 197.0476993 | Yes |
| 1882 | HMDB0142084                       | 2-hydroxy-3,4-dimethoxybenzoic acid                    | C9H10O5    | 197.0476993 | Yes |
| 1882 | HMDB0142087                       | 4-hydroxy-2,3-dimethoxybenzoic acid                    | C9H10O5    | 197.0476993 | Yes |
| 1883 | HMDB0015188; C04771; CHEBI:29063  | Mimosine                                               | C8H10N2O4  | 197.055855  | Yes |
| 1884 | HMDB0004400; C16366               | 5-Acetylamino-6-amino-3-methyluracil                   | C7H10N4O3  | 197.0681276 | Yes |
| 1884 | HMDB0059771; CHEBI:89861          | 6-amino-5[N-methylformylamino]-1-methyluracil          | C7H10N4O3  | 197.0681276 | Yes |
| 1885 | HMDB0004998; CHEBI:200157         | Guaifenesin                                            | C10H14O4   | 197.0819365 | Yes |
| 1885 | HMDB0030991                       | 5-(3E-Pentenyl)tetrahydro-2-oxo-3-furancarboxylic acid | C10H14O4   | 197.0819365 | Yes |
| 1885 | HMDB0033093; CHEBI:125366         | 3-(4-Hydroxy-3-methoxyphenyl)-1,2-propanediol          | C10H14O4   | 197.0819365 | Yes |
| 1885 | HMDB0034099                       | (2E,4E)-2,7-Dimethyl-2,4-octadienedioic acid           | C10H14O4   | 197.0819365 | Yes |
| 1885 | HMDB0059768; CHEBI:89887          | 3,4-Methylene suberic acid                             | C10H14O4   | 197.0819365 | Yes |
| 1885 | HMDB0059779; CHEBI:89869          | 2,3-Methylene suberic acid                             | C10H14O4   | 197.0819365 | Yes |
| 1885 | HMDB0131265                       | 2,3,5-trimethoxy-6-methylphenol                        | C10H14O4   | 197.0819365 | Yes |
| 1885 | HMDB0135755                       | 4-ethyl-2,6-dimethoxybenzene-1,3-diol                  | C10H14O4   | 197.0819365 | Yes |
| 1904 | HMDB0003484; C01102; CHEBI:15961  | O-Phosphohomoserine                                    | C4H10NO6P  | 198.0171191 | No  |
| 1904 | HMDB0011185; C12147; CHEBI:37525  | O-Phosphothreonine                                     | C4H10NO6P  | 198.0171191 | No  |
| 1904 | HMDB0060483; C12215               | Iminoerythrose 4-phosphate                             | C4H10NO6P  | 198.0171191 | No  |
| 1907 | HMDB0014904; C06662; CHEBI:3736   | Clavulanate                                            | C8H9NO5    | 198.0410862 | No  |
| 1907 | HMDB0029414                       | (S)-alpha-Amino-4-carboxy-3-furanpropanoic acid        | C8H9NO5    | 198.0410862 | No  |
| 1908 | HMDB0030376; C08289               | (S)-Isowillardine                                      | C7H9N3O4   | 198.0507493 | No  |
| 1909 | HMDB0032424                       | 2-(4-Methyl-5-thiazolyl)ethyl propionate               | C9H13NO2S  | 198.0598174 | Yes |
| 1913 | HMDB0006406; C12448; CHEBI:708640 | Ecgonine methyl ester                                  | C10H17NO3  | 198.1120614 | Yes |
| 1913 | HMDB0031820                       | Neotussilagine                                         | C10H17NO3  | 198.1120614 | Yes |
| 1913 | HMDB0094801                       | 2-octenoylglycine                                      | C10H17NO3  | 198.1120614 | Yes |
| 1913 | HMDB0094802                       | 3-octenoylglycine                                      | C10H17NO3  | 198.1120614 | Yes |
| 1913 | HMDB0094803                       | 4-octenoylglycine                                      | C10H17NO3  | 198.1120614 | Yes |
| 1913 | HMDB0094804                       | 5-octenoylglycine                                      | C10H17NO3  | 198.1120614 | Yes |
| 1913 | HMDB0094805                       | 6-octenoylglycine                                      | C10H17NO3  | 198.1120614 | Yes |
| 1913 | HMDB0094806                       | 7-octenoylglycine                                      | C10H17NO3  | 198.1120614 | Yes |
| 1929 | HMDB0062775; CHEBI:82931          | 4-Vinylphenol sulfate                                  | C8H8O4S    | 199.0074284 | Yes |
| 1929 | HMDB0124988                       | (3-ethenylphenyl)oxidanedisulfonic acid                | C8H8O4S    | 199.0074284 | Yes |
| 1935 | HMDB0030009                       | 3,6-Dihydro-4-(4-methyl-3-pentenyl)-1,2-dithiin        | C10H16S2   | 199.0626223 | Yes |
| 1936 | HMDB0014738; C14244; CHEBI:34380  | Monobenzene                                            | C13H12O2   | 199.0738122 | Yes |
| 1936 | HMDB0030646                       | (Z)-3-(1-Butenyl)-1H-2-benzopyran-1-one                | C13H12O2   | 199.0738122 | Yes |
| 1936 | HMDB0036460; C08458               | Safynol                                                | C13H12O2   | 199.0738122 | Yes |
| 1937 | HMDB0029838; C06537; CHEBI:27943  | Harmalol                                               | C12H12N2O  | 199.0862848 | Yes |
| 1938 | HMDB0000603                       | cis-4-Decenedioic acid                                 | C10H16O4   | 199.0979435 | Yes |
| 1938 | HMDB0013227                       | cis-5-Decenedioic acid                                 | C10H16O4   | 199.0979435 | Yes |
| 1938 | HMDB0030989                       | 5-Pentyltetrahydro-2-oxo-3-furancarboxylic acid        | C10H16O4   | 199.0979435 | Yes |
| 1938 | HMDB0030990                       | alpha-Carboxy-delta-nonalactone                        | C10H16O4   | 199.0979435 | Yes |
| 1938 | HMDB0034491                       | (±)-Camphoric acid                                     | C10H16O4   | 199.0979435 | Yes |
| 1938 | HMDB0034971                       | (1R,2R,3S,1''R)-Nepetalinic acid                       | C10H16O4   | 199.0979435 | Yes |
| 1938 | HMDB0036715                       | Matsutakic acid A                                      | C10H16O4   | 199.0979435 | Yes |
| 1938 | HMDB0060606                       | Hydralazine acetone hydrazone                          | C11H12N4   | 199.0979435 | Yes |
| 1939 | HMDB0032662; CHEBI:132854         | (S)-9-Hydroxy-10-undecenoic acid                       | C11H20O3   | 199.1341091 | Yes |
| 1939 | HMDB0036029                       | Clarycet                                               | C11H20O3   | 199.1341091 | Yes |
| 1939 | HMDB0037179                       | 3-Nonanone-1-yl acetate                                | C11H20O3   | 199.1341091 | Yes |
| 1940 | HMDB0013076                       | Spermine dialdehyde                                    | C10H20N2O2 | 199.1452846 | No  |
| 1940 | HMDB0041901                       | Hexamethylene bisacetamide                             | C10H20N2O2 | 199.1452846 | No  |
| 1941 | HMDB0000638; C02679; CHEBI:30805  | Dodecanoic acid                                        | C12H24O2   | 199.1704016 | No  |
| 1941 | HMDB0030998; CHEBI:87430          | Ethyl decanoate                                        | C12H24O2   | 199.1704016 | No  |
| 1941 | HMDB0032310; CHEBI:201659         | 2-Heptyl butyrate                                      | C12H24O2   | 199.1704016 | No  |
| 1941 | HMDB0032440                       | Nonanal propyleneglycol acetal                         | C12H24O2   | 199.1704016 | No  |
| 1941 | HMDB0033619                       | Hexyl hexanoate                                        | C12H24O2   | 199.1704016 | No  |
| 1941 | HMDB0034128                       | Isopropyl nonanoate                                    | C12H24O2   | 199.1704016 | No  |

|      |                                      |                                                      |            |             |     |
|------|--------------------------------------|------------------------------------------------------|------------|-------------|-----|
| 1941 | HMDB0034136                          | Octyl butanoate                                      | C12H24O2   | 199.1704016 | No  |
| 1941 | HMDB0034137                          | Octyl 2-methylpropanoate                             | C12H24O2   | 199.1704016 | No  |
| 1941 | HMDB0035410                          | (R)-Dihydrocitronellol acetate                       | C12H24O2   | 199.1704016 | No  |
| 1941 | HMDB0036225                          | Pentyl heptanoate                                    | C12H24O2   | 199.1704016 | No  |
| 1941 | HMDB0040166                          | Decyl acetate                                        | C12H24O2   | 199.1704016 | No  |
| 1941 | HMDB0059868                          | Isobutyl octanoate                                   | C12H24O2   | 199.1704016 | No  |
| 1949 | HMDB0000731; C05824; CHEBI:27891     | Cysteine-S-sulfate                                   | C3H7NO5S2  | 199.9691555 | No  |
| 1956 | HMDB0062715; CHEBI:61509             | N-acetyl-L-2-aminoadipate(2-)                        | C8H11NO5   | 200.0562975 | No  |
| 1960 | HMDB0240212                          | (alpha-keto-dimethyl-delta-N,N-Dimethylguanidynol) v | C8H15N3O3  | 200.103391  | Yes |
| 1961 | HMDB0000832; CHEBI:74099             | Capryloylglycine                                     | C10H19NO3  | 200.1293606 | Yes |
| 1961 | HMDB0013116                          | Valproylglycine                                      | C10H19NO3  | 200.1293606 | Yes |
| 1961 | HMDB0041540                          | N-(5-Methyl-3-oxohexyl)alanine                       | C10H19NO3  | 200.1293606 | Yes |
| 1961 | HMDB0059745; CHEBI:89901             | N-Acetylaminooctanoic acid                           | C10H19NO3  | 200.1293606 | Yes |
| 1968 | HMDB0039431                          | 1,2,4,5,7-Pentathiocane                              | C3H6S5     | 200.9001326 | No  |
| 1976 | HMDB0062551; CHEBI:82932             | 4-ethylphenylsulfate                                 | C8H10O4S   | 201.0234058 | Yes |
| 1976 | HMDB0062721; CHEBI:82935             | 3-ethylphenyl Sulfate                                | C8H10O4S   | 201.0234058 | Yes |
| 1978 | HMDB0029436                          | Penmacric acid                                       | C7H10N2O5  | 201.0516508 | No  |
| 1979 | HMDB0032706; C18750; CHEBI:50397     | (2-Naphthalenyloxy)acetic acid                       | C12H10O3   | 201.0559944 | No  |
| 1979 | HMDB0032713                          | 3,4'',5-Biphenyltriol                                | C12H10O3   | 201.0559944 | No  |
| 1979 | HMDB0034663                          | 5-Hydroxy-2,3-dimethyl-1,4-naphthoquinone            | C12H10O3   | 201.0559944 | No  |
| 1979 | HMDB0038115                          | Setarin                                              | C12H10O3   | 201.0559944 | No  |
| 1981 | HMDB0032306; C04067; CHEBI:16879     | 4-Heptenal diethyl acetal                            | C9H14O5    | 201.0771782 | No  |
| 1981 | HMDB0033092                          | 3-(1-Hydroxymethyl-1-propenyl)pentanedioic acid      | C9H14O5    | 201.0771782 | No  |
| 1983 | HMDB0000792; C08277; CHEBI:41865     | Sebacic acid                                         | C10H18O4   | 201.1127162 | Yes |
| 1983 | HMDB0031510                          | R-2-Hydroxy-3-methylbutanoic acid 3-Methylbutanoyl   | C10H18O4   | 201.1127162 | Yes |
| 1983 | HMDB0040196                          | Oxalic acid dibutyl ester                            | C10H18O4   | 201.1127162 | Yes |
| 1983 | HMDB0059708; CHEBI:68453             | 2-Ethylsuberic acid                                  | C10H18O4   | 201.1127162 | Yes |
| 1983 | HMDB0059719; CHEBI:70747             | Heptylmalonic acid                                   | C10H18O4   | 201.1127162 | Yes |
| 1983 | HMDB0059754; CHEBI:89889             | 3-Methylazelaic acid                                 | C10H18O4   | 201.1127162 | Yes |
| 1983 | HMDB0062180                          | N-lactoyl-Isoeucine                                  | C10H18O4   | 201.1127162 | Yes |
| 1984 | HMDB0001539; C03626; CHEBI:17929     | Asymmetric dimethylarginine                          | C8H18N4O2  | 201.1355317 | Yes |
| 1984 | HMDB0003334; CHEBI:61914             | Symmetric dimethylarginine                           | C8H18N4O2  | 201.1355317 | Yes |
| 1985 | HMDB0032443                          | 3-Hydroxynonyl acetate                               | C11H22O3   | 201.1501607 | No  |
| 1985 | HMDB0061654                          | 3-hydroxyundecanoic acid                             | C11H22O3   | 201.1501607 | No  |
| 1986 | HMDB0013224; CHEBI:74096             | Caproylcholine                                       | C11H24NO2  | 201.1737379 | No  |
| 1987 | HMDB0001256; C00750; CHEBI:15746     | Spermine                                             | C10H26N4   | 201.2091818 | No  |
| 2004 | HMDB0060484; C00331; CHEBI:29750     | Indolepyruvate                                       | C11H9NO3   | 202.0514188 | Yes |
| 2005 | HMDB0028840                          | Glycyl-Glutamate                                     | C7H11N2O5  | 202.0592714 | No  |
| 2007 | HMDB0038440                          | 1-Isothiocyanato-7-(methylthio)heptane               | C9H17NS2   | 202.0721487 | Yes |
| 2008 | HMDB0000201; C02571                  | L-Acetylcarnitine                                    | C9H17NO4   | 202.1088784 | Yes |
| 2008 | HMDB0062176                          | N-lactoyl-Leucine                                    | C9H17NO4   | 202.1088784 | Yes |
| 2009 | HMDB0028846                          | Glycyl-Lysine                                        | C8H17N3O3  | 202.1188616 | No  |
| 2009 | HMDB0028951                          | Lysyl-Glycine                                        | C8H17N3O3  | 202.1188616 | No  |
| 2023 | HMDB0060013; CHEBI:133460            | O-methoxycatechol-O-sulphate                         | C7H8O5S    | 203.0023881 | No  |
| 2024 | HMDB0041031                          | 3,5,6-Trihydroxy-5-(hydroxymethyl)-2-methoxy-2-cycl  | C8H12O6    | 203.0547614 | Yes |
| 2026 | HMDB0011162                          | L-beta-aspartyl-L-alanine                            | C7H12N2O5  | 203.0667386 | Yes |
| 2026 | HMDB0011667; HMDB0029149; CHEBI:7384 | gamma-Glutamylglycine                                | C7H12N2O5  | 203.0667386 | Yes |
| 2026 | HMDB0014986; C07070; CHEBI:484948    | Levamisole                                           | C11H12N2S  | 203.0667386 | Yes |
| 2026 | HMDB0028683                          | Alanyl-Aspartate                                     | C7H12N2O5  | 203.0667386 | Yes |
| 2026 | HMDB0028746                          | Aspartyl-Alanine                                     | C7H12N2O5  | 203.0667386 | Yes |
| 2026 | HMDB0028819; CHEBI:73505             | Glutamylglycine                                      | C7H12N2O5  | 203.0667386 | Yes |
| 2027 | HMDB0033303                          | Anofinic acid                                        | C12H12O3   | 203.0714251 | No  |
| 2027 | HMDB0035095                          | 7-Ethoxy-4-methyl-2H-1-benzopyran-2-one              | C12H12O3   | 203.0714251 | No  |
| 2028 | HMDB0000929; C00078; CHEBI:16828     | L-Tryptophan                                         | C11H12N2O2 | 203.0825683 | Yes |
| 2028 | HMDB0013609; C00525; CHEBI:16296     | D-Tryptophan                                         | C11H12N2O2 | 203.0825683 | Yes |
| 2028 | HMDB0013840                          | 3-Hydroxymethylantipyrine                            | C11H12N2O2 | 203.0825683 | Yes |
| 2028 | HMDB0014892; C07839; CHEBI:4888      | Ethotoin                                             | C11H12N2O2 | 203.0825683 | Yes |
| 2028 | HMDB0030396; C00806; CHEBI:27897     | (±)-Tryptophan                                       | C11H12N2O2 | 203.0825683 | Yes |
| 2028 | HMDB0060533                          | Nirvanol                                             | C11H12N2O2 | 203.0825683 | Yes |
| 2028 | HMDB0060878                          | 4-Hydroxyantipyrine                                  | C11H12N2O2 | 203.0825683 | Yes |
| 2028 | HMDB0060967                          | S-nirvanol                                           | C11H12N2O2 | 203.0825683 | Yes |

|      |                                   |                                                                             |           |             |     |
|------|-----------------------------------|-----------------------------------------------------------------------------|-----------|-------------|-----|
| 2030 | HMDB0029052                       | SerinyI-Valine                                                              | C8H16N2O4 | 203.1040415 | Yes |
| 2030 | HMDB0029136                       | Valyl-Serine                                                                | C8H16N2O4 | 203.1040415 | Yes |
| 2030 | HMDB0033891                       | N6-Acetyl-5S-hydroxy-L-lysine                                               | C8H16N2O4 | 203.1040415 | Yes |
| 2030 | HMDB0039948                       | 3,4-Dihydroxy-2-hydroxymethyl-1-pyrrolidinepropanar                         | C8H16N2O4 | 203.1040415 | Yes |
| 2030 | HMDB0094706; CHEBI:74823          | Serylvaline                                                                 | C8H16N2O4 | 203.1040415 | Yes |
| 2031 | HMDB0033217                       | (2xi,6xi)-7-Methyl-3-methylene-1,2,6,7-octanetetrol                         | C10H20O4  | 203.1290484 | Yes |
| 2031 | HMDB0033642                       | (2xi,3xi,6E)-3,7-Dimethyl-6-octene-1,2,3,8-tetrol                           | C10H20O4  | 203.1290484 | Yes |
| 2031 | HMDB0035133                       | 3,7-Dimethyl-3-octene-1,2,6,7-tetrol                                        | C10H20O4  | 203.1290484 | Yes |
| 2031 | HMDB0039053                       | (1alpha,2alpha,4betaH,6alpha,8R)-p-Menthane-2,6,8,9-tetrol                  | C10H20O4  | 203.1290484 | Yes |
| 2031 | HMDB0039974                       | (1S,2S,4R,8R)-p-Menthane-1,2,8,9-tetrol                                     | C10H20O4  | 203.1290484 | Yes |
| 2041 | HMDB0000881; C02470; CHEBI:217069 | Xanthurenic acid                                                            | C10H7NO4  | 204.0310993 | Yes |
| 2041 | HMDB0032963                       | Zeanic acid                                                                 | C10H7NO4  | 204.0310993 | Yes |
| 2041 | HMDB0033528                       | 4,6-Dihydroxy-2-quinolinecarboxylic acid                                    | C10H7NO4  | 204.0310993 | Yes |
| 2044 | HMDB0000671; C02043; CHEBI:24813  | Indolelactic acid                                                           | C11H11NO3 | 204.0670545 | Yes |
| 2044 | HMDB0004096; C05660; CHEBI:235589 | 5-Methoxyindoleacetate                                                      | C11H11NO3 | 204.0670545 | Yes |
| 2044 | HMDB0011621; CHEBI:613590         | Cinnamoylglycine                                                            | C11H11NO3 | 204.0670545 | Yes |
| 2044 | HMDB0030179                       | Edulitine                                                                   | C11H11NO3 | 204.0670545 | Yes |
| 2044 | HMDB0032755                       | Methyl 1-methoxy-1H-indole-3-carboxylate                                    | C11H11NO3 | 204.0670545 | Yes |
| 2044 | HMDB0059765; CHEBI:89877          | 3-Indolehydracrylic acid                                                    | C11H11NO3 | 204.0670545 | Yes |
| 2046 | HMDB0036394                       | N-Methylcalystegine C1                                                      | C8H15NO5  | 204.0871273 | Yes |
| 2046 | HMDB0040334                       | Dihydro-2,4-dimethyl-6-(2-methylpropyl)-4H-1,3,5-dithiazine                 | C9H19NS2  | 204.0871273 | Yes |
| 2046 | HMDB0040335                       | Dihydro-4,6-dimethyl-2-(2-methylpropyl)-4H-1,3,5-dithiazine                 | C9H19NS2  | 204.0871273 | Yes |
| 2046 | HMDB0040336                       | Dihydro-2,4-dimethyl-6-(1-methylpropyl)-4H-1,3,5-dithiazine                 | C9H19NS2  | 204.0871273 | Yes |
| 2046 | HMDB0040337                       | Dihydro-4,6-dimethyl-2-(1-methylpropyl)-4H-1,3,5-dithiazine                 | C9H19NS2  | 204.0871273 | Yes |
| 2047 | HMDB0040046                       | 1-(2,3-Dihydro-1H-pyrrolizin-5-yl)-1,4-pentanedione                         | C12H15NO2 | 204.1024766 | No  |
| 2049 | HMDB0004231; C05944; CHEBI:895821 | Pantothenol                                                                 | C9H19NO4  | 204.1233211 | No  |
| 2057 | HMDB0059752                       | 5-Sulfoxymethylfurfural                                                     | C6H6O6S   | 204.9816526 | Yes |
| 2057 | HMDB0060016; CHEBI:89613          | Pyrogallol-1-O-sulphate                                                     | C6H6O6S   | 204.9816526 | Yes |
| 2057 | HMDB0060018; CHEBI:89615          | Pyrogallol-2-O-sulphate                                                     | C6H6O6S   | 204.9816526 | Yes |
| 2060 | HMDB0000379; CHEBI:30835          | 2-Methylcitric acid                                                         | C7H10O7   | 205.0360237 | Yes |
| 2060 | HMDB0001451; C00725; CHEBI:30314  | (R)-lipoic acid                                                             | C8H14O2S2 | 205.0360237 | Yes |
| 2060 | HMDB0003518; C01251; CHEBI:52222  | Homocitric acid                                                             | C7H10O7   | 205.0360237 | Yes |
| 2060 | HMDB0006471; C04593; CHEBI:15607  | Methylisocitric acid                                                        | C7H10O7   | 205.0360237 | Yes |
| 2060 | HMDB0014312; CHEBI:43796          | (S)-lipoic acid                                                             | C8H14O2S2 | 205.0360237 | Yes |
| 2060 | HMDB0059932                       | 3-(Carboxymethyl)-3-hydroxypentanedioic acid                                | C7H10O7   | 205.0360237 | Yes |
| 2064 | HMDB0033584                       | Diethyl tartrate                                                            | C8H14O6   | 205.0716537 | No  |
| 2064 | HMDB0038791                       | 2,4,6-Triethyl-1,3,5-oxadithiane                                            | C9H18OS2  | 205.0716537 | No  |
| 2066 | HMDB0029049                       | SerinyI-Threonine                                                           | C7H14N2O5 | 205.0829662 | Yes |
| 2066 | HMDB0029070                       | ThreoninyI-Serine                                                           | C7H14N2O5 | 205.0829662 | Yes |
| 2070 | HMDB0013825                       | 4-(1,1,3,3-Tetramethylbutyl)-phenol                                         | C14H22O   | 205.1599728 | Yes |
| 2070 | HMDB0031737                       | delta-Methylionone                                                          | C14H22O   | 205.1599728 | Yes |
| 2070 | HMDB0031738                       | 3-Methyl-4-(2,6,6-trimethyl-2-cyclohexen-1-yl)-3-buten-2-one                | C14H22O   | 205.1599728 | Yes |
| 2070 | HMDB0032397                       | Methyl-delta-ionone                                                         | C14H22O   | 205.1599728 | Yes |
| 2070 | HMDB0032528; C14205               | alpha-(p-(1,1,3,3-Tetramethylbutyl)phenyl)-omega-hydroxy-2-cyclohexen-1-one | C14H22O   | 205.1599728 | Yes |
| 2070 | HMDB0035245                       | 1-(2,6,6-Trimethyl-2-cyclohexen-1-yl)-1-penten-3-one                        | C14H22O   | 205.1599728 | Yes |
| 2070 | HMDB0035631; C09690; CHEBI:10284  | alpha-Irone                                                                 | C14H22O   | 205.1599728 | Yes |
| 2070 | HMDB0036023                       | Etaspiene                                                                   | C14H22O   | 205.1599728 | Yes |
| 2070 | HMDB0036024                       | 10-Isopropyl-2,7-dimethyl-1-oxaspiro[4.5]deca-3,6-diene                     | C14H22O   | 205.1599728 | Yes |
| 2070 | HMDB0038130; CHEBI:88921          | 1-(2,6,6-Trimethyl-1-cyclohexen-1-yl)-1-penten-3-one                        | C14H22O   | 205.1599728 | Yes |
| 2070 | HMDB0061831; CHEBI:88618          | (Z)-alpha-Irone                                                             | C14H22O   | 205.1599728 | Yes |
| 2070 | HMDB0133179                       | 2-benzylheptan-1-ol                                                         | C14H22O   | 205.1599728 | Yes |
| 2092 | HMDB0000978; C01252; CHEBI:17442  | 4-(2-Aminophenyl)-2,4-dioxobutanoic acid                                    | C10H9NO4  | 206.0461199 | Yes |
| 2092 | HMDB0060328; CHEBI:34099          | 1-Nitro-5,6-dihydroxy-dihydronaphthalene                                    | C10H9NO4  | 206.0461199 | Yes |
| 2094 | HMDB0060664; C16624; CHEBI:80618  | Isoniazid pyruvate                                                          | C9H9N3O3  | 206.0574199 | Yes |
| 2094 | HMDB0061058                       | triazolopropionic acid                                                      | C9H9N3O3  | 206.0574199 | Yes |
| 2095 | HMDB0000985; C00579; CHEBI:17694  | Dihydrolipoamide                                                            | C8H17NOS2 | 206.0681586 | No  |
| 2095 | HMDB0029939; CHEBI:681033         | 6-Amino-9H-purine-9-propanoic acid                                          | C8H9N5O2  | 206.0681586 | No  |
| 2097 | HMDB0000512; C03519; CHEBI:16259  | N-Acetyl-L-phenylalanine                                                    | C11H13NO3 | 206.0816784 | Yes |
| 2097 | HMDB0000860; CHEBI:266653         | Phenylpropionylglycine                                                      | C11H13NO3 | 206.0816784 | Yes |
| 2097 | HMDB0002042                       | 3-Phenylpropionylglycine                                                    | C11H13NO3 | 206.0816784 | Yes |
| 2097 | HMDB0060608                       | N-isopropylterephthalamic acid                                              | C11H13NO3 | 206.0816784 | Yes |

|      |                                    |                                                                           |            |             |     |
|------|------------------------------------|---------------------------------------------------------------------------|------------|-------------|-----|
| 2097 | HMDB0061682; CHEBI:84085           | 2-Acetamido-4-methylphenyl acetate                                        | C11H13NO3  | 206.0816784 | Yes |
| 2098 | HMDB0014634; C07708; CHEBI:545681  | Miglitol                                                                  | C8H17NO5   | 206.1034077 | No  |
| 2100 | HMDB0015319; CHEBI:453011          | Ciclopirox                                                                | C12H17NO2  | 206.118816  | No  |
| 2100 | HMDB0029370; CHEBI:769975          | O-Methylcorypalline                                                       | C12H17NO2  | 206.118816  | No  |
| 2100 | HMDB0037697                        | Isobutyl N-methylanthranilate                                             | C12H17NO2  | 206.118816  | No  |
| 2100 | HMDB0039939                        | Syneprhine acetonide                                                      | C12H17NO2  | 206.118816  | No  |
| 2100 | HMDB0040010                        | 1-(2,3-Dihydro-6,7-dimethyl-1H-pyrrolizin-5-yl)-2-hydroxy-3-methoxyphenyl | C12H17NO2  | 206.118816  | No  |
| 2100 | HMDB0094662                        | Phenyl-Leucine                                                            | C12H17NO2  | 206.118816  | No  |
| 2112 | HMDB0032653                        | (Z)-[3-(Methylsulfinyl)-1-propenyl] 2-propenyl disulfide                  | C7H12OS3   | 206.9971336 | Yes |
| 2115 | HMDB0012210; C02147; CHEBI:18047   | Dihydrolipoate                                                            | C8H16O2S2  | 207.0510454 | Yes |
| 2115 | HMDB0034759                        | Methyl 5-(1-Propynyl)-2-thiophenepropanoate                               | C11H12O2S  | 207.0510454 | Yes |
| 2115 | HMDB0060589                        | Aminofurantoin                                                            | C8H8N4O3   | 207.0510454 | Yes |
| 2117 | HMDB0012127; C09816; CHEBI:1220624 | (R)-2-Benzylsuccinate                                                     | C11H12O4   | 207.066411  | Yes |
| 2117 | HMDB0029185; CHEBI:400905          | 5-(3'',4''-Dihydroxyphenyl)-gamma-valerolactone                           | C11H12O4   | 207.066411  | Yes |
| 2117 | HMDB0034315; CHEBI:86549           | 3-(3,4-Dimethoxyphenyl)-2-propenoic acid                                  | C11H12O4   | 207.066411  | Yes |
| 2117 | HMDB0036055                        | Furapiole                                                                 | C11H12O4   | 207.066411  | Yes |
| 2117 | HMDB0037308                        | 1-(2-Methoxy-3,4-methylenedioxyphenyl)-1-propanone                        | C11H12O4   | 207.066411  | Yes |
| 2117 | HMDB0038510; C02381; CHEBI:16252   | 6-Methoxymellein                                                          | C11H12O4   | 207.066411  | Yes |
| 2117 | HMDB0040892                        | 3-(3-Methoxy-4,5-methylenedioxyphenyl)-2-propen-1-ol                      | C11H12O4   | 207.066411  | Yes |
| 2117 | HMDB0041461                        | Anthriscinol                                                              | C11H12O4   | 207.066411  | Yes |
| 2117 | HMDB0041692                        | 5-(3'',5''-Dihydroxyphenyl)-gamma-valerolactone                           | C11H12O4   | 207.066411  | Yes |
| 2117 | HMDB0127491                        | 3-(3,5-dimethoxyphenyl)prop-2-enoic acid                                  | C11H12O4   | 207.066411  | Yes |
| 2117 | HMDB0131169                        | methyl (2E)-3-(2-hydroxy-4-methoxyphenyl)prop-2-en-1-ol                   | C11H12O4   | 207.066411  | Yes |
| 2117 | HMDB0133456                        | (3Z)-3-hydroxy-4-(4-hydroxy-3-methoxyphenyl)but-3-en-2-one                | C11H12O4   | 207.066411  | Yes |
| 2117 | HMDB0133458                        | 4-(3,4-dihydroxy-5-methoxyphenyl)but-3-en-2-one                           | C11H12O4   | 207.066411  | Yes |
| 2117 | HMDB0133459                        | 4-(2,4-dihydroxy-5-methoxyphenyl)but-3-en-2-one                           | C11H12O4   | 207.066411  | Yes |
| 2117 | HMDB0133460                        | 4-(2,4-dihydroxy-3-methoxyphenyl)but-3-en-2-one                           | C11H12O4   | 207.066411  | Yes |
| 2117 | HMDB0133461                        | 1-[3-(4-hydroxy-3-methoxyphenyl)oxiran-2-yl]ethan-1-ol                    | C11H12O4   | 207.066411  | Yes |
| 2117 | HMDB0133462                        | 1-hydroxy-4-(4-hydroxy-3-methoxyphenyl)but-3-en-2-one                     | C11H12O4   | 207.066411  | Yes |
| 2117 | HMDB0133474                        | 1-(4-hydroxy-3-methoxyphenyl)butane-2,3-dione                             | C11H12O4   | 207.066411  | Yes |
| 2117 | HMDB0138526                        | 3-(3,4-dimethoxyphenyl)prop-2-enoic acid                                  | C11H12O4   | 207.066411  | Yes |
| 2117 | HMDB0142179                        | 2-benzylbutanedioic acid                                                  | C11H12O4   | 207.066411  | Yes |
| 2119 | HMDB0003066; C01484; CHEBI:48965   | Chalcone                                                                  | C15H12O    | 207.0826038 | Yes |
| 2119 | HMDB0060323; CHEBI:27753           | 1-Methoxyphenanthrene                                                     | C15H12O    | 207.0826038 | Yes |
| 2119 | HMDB0135598                        | 1,3-diphenylprop-2-en-1-one                                               | C15H12O    | 207.0826038 | Yes |
| 2120 | HMDB0029968                        | Ethyl beta-D-glucopyranoside                                              | C8H16O6    | 207.0876408 | Yes |
| 2120 | HMDB0033942                        | Dambonitol                                                                | C8H16O6    | 207.0876408 | Yes |
| 2123 | HMDB0029867; C16975                | Isoelemicin                                                               | C12H16O3   | 207.1020804 | No  |
| 2123 | HMDB0029872; C17821                | gamma-Asarone                                                             | C12H16O3   | 207.1020804 | No  |
| 2123 | HMDB0030150                        | Jasmine ketolactone                                                       | C12H16O3   | 207.1020804 | No  |
| 2123 | HMDB0030197                        | (Z)-3-Oxo-2-(2-pentenyl)-1-cyclopenteneacetic acid                        | C12H16O3   | 207.1020804 | No  |
| 2123 | HMDB0030681                        | 5-Deoxydiplosporin                                                        | C12H16O3   | 207.1020804 | No  |
| 2123 | HMDB0031469; C17846                | trans-Isoasarone                                                          | C12H16O3   | 207.1020804 | No  |
| 2123 | HMDB0033778; C10451                | Elemicin                                                                  | C12H16O3   | 207.1020804 | No  |
| 2123 | HMDB0034991                        | 4-Methoxybenzyl butanoate                                                 | C12H16O3   | 207.1020804 | No  |
| 2123 | HMDB0035224                        | 3,4-Dihydro-6-methoxy-3,7-dimethyl-1H-2-benzopyran                        | C12H16O3   | 207.1020804 | No  |
| 2123 | HMDB0038604                        | Amyl salicylate                                                           | C12H16O3   | 207.1020804 | No  |
| 2123 | HMDB0040218                        | 2-Phenoxyethyl isobutyrate                                                | C12H16O3   | 207.1020804 | No  |
| 2123 | HMDB0040225                        | Isoamyl salicylate                                                        | C12H16O3   | 207.1020804 | No  |
| 2123 | HMDB0041411                        | 3,4-Dihydro-6-methoxy-2,2-dimethyl-2H-1-benzopyran                        | C12H16O3   | 207.1020804 | No  |
| 2123 | HMDB0124910                        | 5-methoxy-2-(3-methylbut-2-en-1-yl)benzene-1,3-diol                       | C12H16O3   | 207.1020804 | No  |
| 2123 | HMDB0126246                        | 4-methoxy-2-(3-methylbut-2-en-1-yl)benzene-1,3-diol                       | C12H16O3   | 207.1020804 | No  |
| 2123 | HMDB0132980                        | 4-hydroxy-1-(4-methoxyphenyl)pentan-3-one                                 | C12H16O3   | 207.1020804 | No  |
| 2123 | HMDB0132982                        | 1-hydroxy-5-(4-methoxyphenyl)pentan-3-one                                 | C12H16O3   | 207.1020804 | No  |
| 2123 | HMDB0132984                        | 2-hydroxy-1-(4-methoxyphenyl)pentan-3-one                                 | C12H16O3   | 207.1020804 | No  |
| 2123 | HMDB0132985                        | 1-hydroxy-1-(4-methoxyphenyl)pentan-3-one                                 | C12H16O3   | 207.1020804 | No  |
| 2123 | HMDB0133263                        | 4-methoxy-6-(3-methylbut-2-en-1-yl)benzene-1,3-diol                       | C12H16O3   | 207.1020804 | No  |
| 2124 | HMDB0015217; C07474; CHEBI:8207    | Pilocarpine                                                               | C11H16N2O2 | 207.1140593 | No  |
| 2124 | HMDB0060813                        | Descarbonyl-lacosamide                                                    | C11H16N2O2 | 207.1140593 | No  |
| 2127 | HMDB0029668                        | Eremopetasinorol                                                          | C13H20O2   | 207.139144  | No  |
| 2127 | HMDB0031869                        | (S,E)-Lyratol propanoate                                                  | C13H20O2   | 207.139144  | No  |

|      |                                    |                                                        |            |             |     |
|------|------------------------------------|--------------------------------------------------------|------------|-------------|-----|
| 2127 | HMDB0034672                        | (5alpha,8beta,9beta)-5,9-Epoxy-3,6-megastigmadien-8    | C13H20O2   | 207.139144  | No  |
| 2127 | HMDB0034984                        | (5R,6S)-5,6-Epoxy-7-megastigmen-9-one                  | C13H20O2   | 207.139144  | No  |
| 2127 | HMDB0035228                        | Theaspirone A                                          | C13H20O2   | 207.139144  | No  |
| 2127 | HMDB0036686                        | 2,2,6,7-Tetramethylbicyclo[4.3.0]nona-1(9),4-diene-7,8 | C13H20O2   | 207.139144  | No  |
| 2127 | HMDB0036821                        | 3-Hydroxy-beta-ionone                                  | C13H20O2   | 207.139144  | No  |
| 2127 | HMDB0036824                        | Acetal R                                               | C13H20O2   | 207.139144  | No  |
| 2127 | HMDB0037776                        | 5,9:6,9-Diepoxy-3-megastigmen                          | C13H20O2   | 207.139144  | No  |
| 2127 | HMDB0038047                        | Carvyl propionate                                      | C13H20O2   | 207.139144  | No  |
| 2127 | HMDB0038529                        | 5,9:6,9-Diepoxy-4-megastigmen                          | C13H20O2   | 207.139144  | No  |
| 2127 | HMDB0040233                        | 2,3,5,6,8,8a-Hexahydro-2,5,5,8a-tetramethyl-7H-1-ber   | C13H20O2   | 207.139144  | No  |
| 2127 | HMDB0041636                        | (3R,8E)-3-Hydroxy-5,8-megastigmadien-7-one             | C13H20O2   | 207.139144  | No  |
| 2127 | HMDB0132947                        | 1-(4-methoxyphenyl)-4-methylpentan-3-ol                | C13H20O2   | 207.139144  | No  |
| 2145 | HMDB0000735; C05596; CHEBI:28595   | Hydroxyphenylacetyl glycine                            | C10H11NO4  | 208.0617471 | Yes |
| 2145 | HMDB0060367; C16591; CHEBI:80589   | 3-Carbamoyl-2-phenylpropionic acid                     | C10H11NO4  | 208.0617471 | Yes |
| 2145 | HMDB0126552                        | 2-[[hydroxy(2-methoxyphenyl)methylidene]amino]ace      | C10H11NO4  | 208.0617471 | Yes |
| 2145 | HMDB0127991                        | 2-[[hydroxy(3-methoxyphenyl)methylidene]amino]ace      | C10H11NO4  | 208.0617471 | Yes |
| 2145 | HMDB0131190                        | 2-[[4-methoxyphenyl]formamido]acetic acid              | C10H11NO4  | 208.0617471 | Yes |
| 2147 | HMDB0032757                        | 3-Methyl-9H-carbazole-9-carboxaldehyde                 | C14H11NO   | 208.0767522 | No  |
| 2147 | HMDB0033000                        | 10-Methylacridone                                      | C14H11NO   | 208.0767522 | No  |
| 2147 | HMDB0060652; C16604                | 2-Hydroxyiminostilbene                                 | C14H11NO   | 208.0767522 | No  |
| 2148 | HMDB0015255; C11181; CHEBI:8452    | Proflavine                                             | C13H11N3   | 208.0856176 | No  |
| 2173 | HMDB0000639; C00879; CHEBI:30852   | Galactaric acid                                        | C6H10O8    | 209.0307692 | Yes |
| 2173 | HMDB0000663; C00818; CHEBI:16002   | Glucaric acid                                          | C6H10O8    | 209.0307692 | Yes |
| 2173 | HMDB0029881; C00818; CHEBI:1139229 | D-Glucaric acid                                        | C6H10O8    | 209.0307692 | Yes |
| 2174 | HMDB0011714                        | Vanilpyruvic acid                                      | C10H10O5   | 209.0456742 | Yes |
| 2174 | HMDB0035484; C05619                | 3-(3,4-Dihydroxy-5-methoxy)-2-propenoic acid           | C10H10O5   | 209.0456742 | Yes |
| 2174 | HMDB0125514                        | (2E)-3-(2,4-dihydroxy-5-methoxyphenyl)prop-2-enoic a   | C10H10O5   | 209.0456742 | Yes |
| 2174 | HMDB0125515                        | (2E)-3-(2,4-dihydroxy-3-methoxyphenyl)prop-2-enoic a   | C10H10O5   | 209.0456742 | Yes |
| 2174 | HMDB0125516                        | 3-(4-hydroxy-3-methoxyphenyl)oxirane-2-carboxylic ac   | C10H10O5   | 209.0456742 | Yes |
| 2174 | HMDB0127490                        | 3-(3,4-dihydroxy-5-methoxyphenyl)prop-2-enoic acid     | C10H10O5   | 209.0456742 | Yes |
| 2174 | HMDB0127946                        | 3-(2,4-dihydroxy-5-methoxyphenyl)prop-2-enoic acid     | C10H10O5   | 209.0456742 | Yes |
| 2174 | HMDB0127947                        | 3-(2,4-dihydroxy-3-methoxyphenyl)prop-2-enoic acid     | C10H10O5   | 209.0456742 | Yes |
| 2174 | HMDB0132221                        | 3-(2,3-dihydroxy-4-methoxyphenyl)prop-2-enoic acid     | C10H10O5   | 209.0456742 | Yes |
| 2174 | HMDB0132228                        | 3-(2,5-dihydroxy-4-methoxyphenyl)prop-2-enoic acid     | C10H10O5   | 209.0456742 | Yes |
| 2174 | HMDB0140909                        | 3-(3-hydroxy-4-methoxyphenyl)oxirane-2-carboxylic ac   | C10H10O5   | 209.0456742 | Yes |
| 2174 | HMDB0141258                        | (2Z)-2-hydroxy-3-(4-hydroxy-3-methoxyphenyl)prop-2-    | C10H10O5   | 209.0456742 | Yes |
| 2174 | HMDB0141331                        | 3-(3,5-dihydroxy-4-methoxyphenyl)prop-2-enoic acid     | C10H10O5   | 209.0456742 | Yes |
| 2174 | HMDB0142176                        | 2-[(2-hydroxyphenyl)methyl]propanedioic acid           | C10H10O5   | 209.0456742 | Yes |
| 2174 | HMDB0142177                        | 2-[hydroxy(phenyl)methyl]propanedioic acid             | C10H10O5   | 209.0456742 | Yes |
| 2174 | HMDB0142178                        | 2-[(4-hydroxyphenyl)methyl]propanedioic acid           | C10H10O5   | 209.0456742 | Yes |
| 2174 | HMDB0142180                        | 2-benzyl-2-hydroxypropanedioic acid                    | C10H10O5   | 209.0456742 | Yes |
| 2174 | HMDB0142181                        | 2-[(3-hydroxyphenyl)methyl]propanedioic acid           | C10H10O5   | 209.0456742 | Yes |
| 2175 | HMDB0031813                        | N-Carbamoyl-2-amino-2-(4-hydroxyphenyl)acetic acid     | C9H10N2O4  | 209.0569617 | Yes |
| 2175 | HMDB0061683; CHEBI:68589           | N-(5-Amino-2-hydroxybenzoyl)glycine                    | C9H10N2O4  | 209.0569617 | Yes |
| 2177 | HMDB0002123; CHEBI:691622          | 1,3,7-Trimethyluric acid                               | C8H10N4O3  | 209.0679976 | No  |
| 2177 | HMDB0036431                        | 1,3,9-Trimethyluric acid                               | C8H10N4O3  | 209.0679976 | No  |
| 2180 | HMDB0015441; C07826; CHEBI:2791    | Aprobarbital                                           | C10H14N2O3 | 209.0929773 | No  |
| 2182 | HMDB0032797; C08491; CHEBI:18292   | Jasmonic acid                                          | C12H18O3   | 209.1183296 | No  |
| 2182 | HMDB0032871                        | Sedanonic acid                                         | C12H18O3   | 209.1183296 | No  |
| 2182 | HMDB0033102                        | Dihydro-3-(2-octenyl)-2,5-furandione                   | C12H18O3   | 209.1183296 | No  |
| 2182 | HMDB0037104                        | (R)-8-Acetoxycarvotanacetone                           | C12H18O3   | 209.1183296 | No  |
| 2182 | HMDB0037135                        | 1-Benzyloxy-1-(2-methoxyethoxy)ethane                  | C12H18O3   | 209.1183296 | No  |
| 2182 | HMDB0037642                        | 4-(Butoxymethyl)-2-methoxyphenol                       | C12H18O3   | 209.1183296 | No  |
| 2182 | HMDB0037735                        | Isoamyl 2-furonpropionate                              | C12H18O3   | 209.1183296 | No  |
| 2182 | HMDB0037816                        | Dihydro-3-(1-octenyl)-2,5-furandione                   | C12H18O3   | 209.1183296 | No  |
| 2182 | HMDB0041573                        | 3-Ethenyl-2,5-dimethyl-4-oxohex-5-en-2-yl acetate      | C12H18O3   | 209.1183296 | No  |
| 2183 | HMDB0034276                        | L,L-Cyclo(leucylpropyl)                                | C11H18N2O2 | 209.1299654 | No  |
| 2184 | HMDB0030425                        | Linalyl propionate                                     | C13H22O2   | 209.1551076 | No  |
| 2184 | HMDB0031014                        | Methyl (2E,6Z)-dodecadienoate                          | C13H22O2   | 209.1551076 | No  |
| 2184 | HMDB0032052                        | alpha-Terpineol propanoate                             | C13H22O2   | 209.1551076 | No  |
| 2184 | HMDB0032098                        | Cepanone                                               | C13H22O2   | 209.1551076 | No  |

|      |                                   |                                                        |           |             |     |
|------|-----------------------------------|--------------------------------------------------------|-----------|-------------|-----|
| 2184 | HMDB0037286                       | Citral propylene glycol acetal                         | C13H22O2  | 209.1551076 | No  |
| 2184 | HMDB0037307                       | Propyl 2,4-decadienoate                                | C13H22O2  | 209.1551076 | No  |
| 2184 | HMDB0037390                       | Tsibulin 1                                             | C13H22O2  | 209.1551076 | No  |
| 2184 | HMDB0038249                       | Isobornyl propionate                                   | C13H22O2  | 209.1551076 | No  |
| 2184 | HMDB0038258                       | Neryl propionate                                       | C13H22O2  | 209.1551076 | No  |
| 2184 | HMDB0038291                       | 2-Propenyl cyclohexanebutanoate                        | C13H22O2  | 209.1551076 | No  |
| 2184 | HMDB0040232                       | Octahydro-2,5,5,8a-tetramethyl-7H-1-benzopyran-7-ol    | C13H22O2  | 209.1551076 | No  |
| 2184 | HMDB0041554                       | Artemisyl propionate                                   | C13H22O2  | 209.1551076 | No  |
| 2196 | HMDB0011639; CHEBI:36076          | Topaquinone                                            | C9H9NO5   | 210.0410179 | Yes |
| 2196 | HMDB0029842; C08538; CHEBI:27483  | Betalamic acid                                         | C9H9NO5   | 210.0410179 | Yes |
| 2196 | HMDB0034864; C04720; CHEBI:18048  | 2,4-Dihydroxy-7-methoxy-2H-1,4-benzoxazin-3(4H)-one    | C9H9NO5   | 210.0410179 | Yes |
| 2196 | HMDB0059999                       | Gentisuric acid                                        | C9H9NO5   | 210.0410179 | Yes |
| 2196 | HMDB0124989                       | 2-([(3,4-dihydroxyphenyl)(hydroxy)methylidene]amino    | C9H9NO5   | 210.0410179 | Yes |
| 2196 | HMDB0126443                       | 2-([(2,4-dihydroxyphenyl)(hydroxy)methylidene]amino    | C9H9NO5   | 210.0410179 | Yes |
| 2196 | HMDB0126654                       | 2-([(3,5-dihydroxyphenyl)(hydroxy)methylidene]amino    | C9H9NO5   | 210.0410179 | Yes |
| 2196 | HMDB0134101                       | 2-([(2,3-dihydroxyphenyl)(hydroxy)methylidene]amino    | C9H9NO5   | 210.0410179 | Yes |
| 2197 | HMDB0030216; CHEBI:715293         | Mukonal                                                | C13H9NO2  | 210.056035  | Yes |
| 2198 | HMDB0060410; CHEBI:61126          | 6-Carboxy-5,6,7,8-tetrahydropterin                     | C7H9N5O3  | 210.060735  | Yes |
| 2199 | HMDB0014380; C07224; CHEBI:50693  | Milrinone                                              | C12H9N3O  | 210.066335  | Yes |
| 2201 | HMDB0001434                       | 3-Methoxytyrosine                                      | C10H13NO4 | 210.0773637 | Yes |
| 2201 | HMDB0011754; C07194; CHEBI:61058  | Methyl dopa                                            | C10H13NO4 | 210.0773637 | Yes |
| 2201 | HMDB0060747; CHEBI:82913          | 3-O-Methyl-a-methyl dopa                               | C10H13NO4 | 210.0773637 | Yes |
| 2202 | HMDB0015078; C07207; CHEBI:10101  | Zalcitabine                                            | C9H13N3O3 | 210.0884906 | Yes |
| 2203 | HMDB0014861; C07513; CHEBI:111775 | Methoxamine                                            | C11H17NO3 | 210.1125129 | No  |
| 2203 | HMDB0014954; C07144; CHEBI:144647 | Orciprenaline                                          | C11H17NO3 | 210.1125129 | No  |
| 2203 | HMDB0015197; C07056; CHEBI:64317  | Isoproterenol                                          | C11H17NO3 | 210.1125129 | No  |
| 2220 | HMDB0015045; C07504; CHEBI:10127  | Zonisamide                                             | C8H8N2O3S | 211.018618  | No  |
| 2222 | HMDB0013696; CHEBI:1050862        | Urolithin B                                            | C13H8O3   | 211.0395444 | Yes |
| 2222 | HMDB0032997                       | 2-Hydroxyxanthone                                      | C13H8O3   | 211.0395444 | Yes |
| 2222 | HMDB0032999                       | 4-Hydroxyxanthone                                      | C13H8O3   | 211.0395444 | Yes |
| 2225 | HMDB0000913; CHEBI:1240674        | Vanillactic acid                                       | C10H12O5  | 211.0614535 | Yes |
| 2225 | HMDB0031704; C10674               | Danielone                                              | C10H12O5  | 211.0614535 | Yes |
| 2225 | HMDB0033835; C11155               | Propyl gallate                                         | C10H12O5  | 211.0614535 | Yes |
| 2225 | HMDB0033839; CHEBI:454991         | Eudesmic acid                                          | C10H12O5  | 211.0614535 | Yes |
| 2225 | HMDB0034493; C09801               | Valtrate                                               | C10H12O5  | 211.0614535 | Yes |
| 2225 | HMDB0041286                       | 2,3-Dihydroxy-1-(4-hydroxy-3-methoxyphenyl)-1-propanol | C10H12O5  | 211.0614535 | Yes |
| 2225 | HMDB0041661                       | 3,4-Dihydroxyphenyllactic acid methyl ester            | C10H12O5  | 211.0614535 | Yes |
| 2225 | HMDB0041663                       | 3-(3,4-Dihydroxyphenyl)-2-methoxypropionic acid        | C10H12O5  | 211.0614535 | Yes |
| 2225 | HMDB0041665                       | 3-Hydroxy-4-methoxyphenyllactic acid                   | C10H12O5  | 211.0614535 | Yes |
| 2225 | HMDB0060557                       | beta-(2-Methoxyphenoxy)-lactic acid                    | C10H12O5  | 211.0614535 | Yes |
| 2225 | HMDB0125013                       | 2-(2,5-dihydroxy-4-methoxyphenyl)propanoic acid        | C10H12O5  | 211.0614535 | Yes |
| 2225 | HMDB0125520                       | 3-(2,4-dihydroxy-5-methoxyphenyl)propanoic acid        | C10H12O5  | 211.0614535 | Yes |
| 2225 | HMDB0125526                       | 3-(3,4-dihydroxy-5-methoxyphenyl)propanoic acid        | C10H12O5  | 211.0614535 | Yes |
| 2225 | HMDB0125540                       | 3-(2,4-dihydroxy-3-methoxyphenyl)propanoic acid        | C10H12O5  | 211.0614535 | Yes |
| 2225 | HMDB0129354                       | 2-(2,3-dihydroxy-4-methoxyphenyl)propanoic acid        | C10H12O5  | 211.0614535 | Yes |
| 2225 | HMDB0131424                       | 2-(4-hydroxy-3,5-dimethoxyphenyl)acetic acid           | C10H12O5  | 211.0614535 | Yes |
| 2225 | HMDB0133486                       | 3-hydroxy-3-(4-hydroxy-3-methoxyphenyl)propanoic acid  | C10H12O5  | 211.0614535 | Yes |
| 2225 | HMDB0142083                       | 2,3,4-trimethoxybenzoic acid                           | C10H12O5  | 211.0614535 | Yes |
| 2226 | HMDB0014814; C12537; CHEBI:41237  | Benzyl Benzoate                                        | C14H12O2  | 211.0771388 | No  |
| 2226 | HMDB0032039; C01408; CHEBI:17682  | Benzoin                                                | C14H12O2  | 211.0771388 | No  |
| 2226 | HMDB0037153                       | S-2,5-Dimethyl-3-furanyl 3-methylbutanethioate         | C11H16O2S | 211.0771388 | No  |
| 2227 | HMDB0028843                       | Glycyl-Histidine                                       | C8H12N4O3 | 211.0838352 | Yes |
| 2227 | HMDB0028885                       | Histidiny-Glycine                                      | C8H12N4O3 | 211.0838352 | Yes |
| 2228 | HMDB0030311; C06538; CHEBI:28121  | Harmine                                                | C13H12N2O | 211.0904388 | Yes |
| 2228 | HMDB0032066; CHEBI:41320          | Carbanilide                                            | C13H12N2O | 211.0904388 | Yes |
| 2229 | HMDB0029707; C19254               | 2-Amino-3,4-dimethylimidazo[4,5-f]quinoline            | C12H12N4  | 211.0967159 | Yes |
| 2229 | HMDB0059744; CHEBI:89902          | 3,4-Methyleneazelaic acid                              | C11H16O4  | 211.0967159 | Yes |
| 2232 | HMDB0029388                       | Cucurbitic acid                                        | C12H20O3  | 211.1338448 | Yes |
| 2232 | HMDB0033601                       | Dihydrojasmonic acid                                   | C12H20O3  | 211.1338448 | Yes |
| 2232 | HMDB0035085                       | Vulgarole                                              | C12H20O3  | 211.1338448 | Yes |
| 2232 | HMDB0037326; C16309; CHEBI:19144  | Traumatin                                              | C12H20O3  | 211.1338448 | Yes |

|      |                                  |                                                        |            |             |     |
|------|----------------------------------|--------------------------------------------------------|------------|-------------|-----|
| 2232 | HMDB0041572                      | 3-Ethenyl-4-hydroxy-2,5-dimethylhex-5-en-2-yl acetate  | C12H20O3   | 211.1338448 | Yes |
| 2233 | HMDB0031017                      | 10-Undecenyl acetate                                   | C13H24O2   | 211.1704971 | No  |
| 2233 | HMDB0031028                      | Methyl (E)-2-dodecenoate                               | C13H24O2   | 211.1704971 | No  |
| 2233 | HMDB0031741                      | Coniferan                                              | C13H24O2   | 211.1704971 | No  |
| 2233 | HMDB0032792                      | (±)-(E)-3-Methyl-4-decen-1-yl acetate                  | C13H24O2   | 211.1704971 | No  |
| 2233 | HMDB0034286                      | Ethyl 10-undecenoate                                   | C13H24O2   | 211.1704971 | No  |
| 2233 | HMDB0037187                      | Rhodinyl propionate                                    | C13H24O2   | 211.1704971 | No  |
| 2233 | HMDB0037226                      | Citronellyl propionate                                 | C13H24O2   | 211.1704971 | No  |
| 2233 | HMDB0037626                      | 1-Ethylhexyl tiglate                                   | C13H24O2   | 211.1704971 | No  |
| 2233 | HMDB0037907                      | 2,6,10,10-Tetramethyl-1-oxaspiro[4.5]decan-6-ol        | C13H24O2   | 211.1704971 | No  |
| 2233 | HMDB0038078                      | 1,1-Diethoxy-2,6-nonadiene                             | C13H24O2   | 211.1704971 | No  |
| 2233 | HMDB0039805                      | 4-(3-Hydroxybutyl)-3,3,5-trimethylcyclohexanone        | C13H24O2   | 211.1704971 | No  |
| 2233 | HMDB0040451                      | Oxacyclotetradecan-2-one                               | C13H24O2   | 211.1704971 | No  |
| 2242 | HMDB0012250; C03082              | L-Aspartyl-4-phosphate                                 | C4H8NO7P   | 211.996728  | No  |
| 2243 | HMDB0000682; CHEBI:43355         | Indoxyl sulfate                                        | C8H7NO4S   | 212.0023698 | Yes |
| 2246 | HMDB0094807                      | 2-nonenoylglycine                                      | C11H19NO3  | 212.1294527 | No  |
| 2246 | HMDB0094808                      | 3-nonenoylglycine                                      | C11H19NO3  | 212.1294527 | No  |
| 2246 | HMDB0094809                      | 4-nonenoylglycine                                      | C11H19NO3  | 212.1294527 | No  |
| 2246 | HMDB0094810                      | 5-nonenoylglycine                                      | C11H19NO3  | 212.1294527 | No  |
| 2246 | HMDB0094811                      | 6-nonenoylglycine                                      | C11H19NO3  | 212.1294527 | No  |
| 2246 | HMDB0094812                      | 7-nonenoylglycine                                      | C11H19NO3  | 212.1294527 | No  |
| 2246 | HMDB0094813                      | 8-nonenoylglycine                                      | C11H19NO3  | 212.1294527 | No  |
| 2267 | HMDB0006801; C06054; CHEBI:27951 | 2-Oxo-3-hydroxy-4-phosphobutanoic acid                 | C4H7O8P    | 212.9822353 | Yes |
| 2271 | HMDB0135284                      | {{[(2E)-3-phenylprop-2-en-1-yl]oxy}sulfonic acid       | C9H10O4S   | 213.0223733 | Yes |
| 2272 | HMDB0014772; CHEBI:63845         | Sulfacetamide                                          | C8H10N2O3S | 213.0340961 | No  |
| 2273 | HMDB0128186                      | 2-hydroxy-3-(2,4,5-trihydroxyphenyl)propanoic acid     | C9H10O6    | 213.0407769 | No  |
| 2273 | HMDB0135756                      | 2,4-dihydroxy-3,5-dimethoxybenzoic acid                | C9H10O6    | 213.0407769 | No  |
| 2273 | HMDB0141548                      | 2-hydroxy-3-(3,4,5-trihydroxyphenyl)propanoic acid     | C9H10O6    | 213.0407769 | No  |
| 2274 | HMDB0032018; C14163; CHEBI:34918 | Phenyl salicylate                                      | C13H10O3   | 213.0555203 | No  |
| 2274 | HMDB0032583                      | 4''-Hydroxy-2-biphenylcarboxylic acid                  | C13H10O3   | 213.0555203 | No  |
| 2274 | HMDB0041807; CHEBI:72631         | 3-Phenoxybenzoic acid                                  | C13H10O3   | 213.0555203 | No  |
| 2274 | HMDB0130049                      | 3-[(1E)-buta-1,3-dien-1-yl]-5-hydroxy-1H-isochromen-1  | C13H10O3   | 213.0555203 | No  |
| 2276 | HMDB0004822; CHEBI:89480         | Methyl bisnorbiotinyl ketone                           | C9H14N2O2S | 213.0727562 | No  |
| 2278 | HMDB0012111; C16015; CHEBI:50014 | (+)-(1R,2R)-1,2-Diphenylethane-1,2-diol                | C14H14O2   | 213.0916647 | No  |
| 2278 | HMDB0029553                      | (E)-2-(2,4-Hexadiynylidene)-1,6-dioxaspiro[4.5]dec-3-e | C14H14O2   | 213.0916647 | No  |
| 2278 | HMDB0032709                      | Ethyl 1-naphthylacetic acid                            | C14H14O2   | 213.0916647 | No  |
| 2278 | HMDB0135186                      | 1,2-diphenylethane-1,2-diol                            | C14H14O2   | 213.0916647 | No  |
| 2279 | HMDB0030984                      | 5-Hexyltetrahydro-2-oxo-3-furancarboxylic acid         | C11H18O4   | 213.1135613 | No  |
| 2279 | HMDB0030985                      | alpha-Carboxy-delta-decalactone                        | C11H18O4   | 213.1135613 | No  |
| 2279 | HMDB0030986                      | 2-Carboxy-5,7-dimethyl-4-octanolide                    | C11H18O4   | 213.1135613 | No  |
| 2281 | HMDB0010727; C02367; CHEBI:18037 | 3-Oxododecanoic acid                                   | C12H22O3   | 213.1482777 | No  |
| 2281 | HMDB0037398                      | 4-Acetoxy-2-hexyltetrahydrofuran                       | C12H22O3   | 213.1482777 | No  |
| 2282 | HMDB0000910; C17076; CHEBI:45919 | Tridecanoic acid                                       | C13H26O2   | 213.1863241 | No  |
| 2282 | HMDB0029552                      | Ethyl undecanoate                                      | C13H26O2   | 213.1863241 | No  |
| 2282 | HMDB0031018; CHEBI:87494         | Methyl dodecanoate                                     | C13H26O2   | 213.1863241 | No  |
| 2282 | HMDB0032211                      | Decanal propyleneglycol acetal                         | C13H26O2   | 213.1863241 | No  |
| 2282 | HMDB0034140                      | Octyl 3-methylbutanoate                                | C13H26O2   | 213.1863241 | No  |
| 2282 | HMDB0036217; C04780; CHEBI:15720 | Pentyl octanoate                                       | C13H26O2   | 213.1863241 | No  |
| 2282 | HMDB0036219                      | Octyl 2-methylbutyrate                                 | C13H26O2   | 213.1863241 | No  |
| 2282 | HMDB0037311                      | Decyl propionate                                       | C13H26O2   | 213.1863241 | No  |
| 2282 | HMDB0038729; CHEBI:87536         | 3-Methylbutyl octanoate                                | C13H26O2   | 213.1863241 | No  |
| 2282 | HMDB0059900; CHEBI:86973         | Propyl decanoate                                       | C13H26O2   | 213.1863241 | No  |
| 2282 | HMDB0061828                      | 9-Methyldodecanoic acid                                | C13H26O2   | 213.1863241 | No  |
| 2282 | HMDB0061829                      | Isopropyl dodecanoic acid                              | C13H26O2   | 213.1863241 | No  |
| 2298 | HMDB0000114; C01233              | Glycerylphosphorylethanolamine                         | C5H14NO6P  | 214.0487698 | No  |
| 2298 | HMDB0059660; CHEBI:16929         | sn-glycero-3-Phosphoethanolamine                       | C5H14NO6P  | 214.0487698 | No  |
| 2305 | HMDB0013124; CHEBI:86076         | Propenoylcarnitine                                     | C10H17NO4  | 214.10861   | No  |
| 2305 | HMDB0094732                      | 1-hydroxyoct-2-enoylglycine                            | C10H17NO4  | 214.10861   | No  |
| 2305 | HMDB0094733                      | 1-hydroxyoct-3-enoylglycine                            | C10H17NO4  | 214.10861   | No  |
| 2305 | HMDB0094734                      | 1-hydroxyoct-4-enoylglycine                            | C10H17NO4  | 214.10861   | No  |
| 2305 | HMDB0094735                      | 1-hydroxyoct-5-enoylglycine                            | C10H17NO4  | 214.10861   | No  |



|      |                          |                                                      |           |             |     |
|------|--------------------------|------------------------------------------------------|-----------|-------------|-----|
| 2305 | HMDB0094736              | 1-hydroxyoct-6-enoylglycine                          | C10H17NO4 | 214.10861   | No  |
| 2305 | HMDB0094737              | 1-hydroxyoct-7-enoylglycine                          | C10H17NO4 | 214.10861   | No  |
| 2305 | HMDB0094738              | 2-hydroxyoct-1-enoylglycine                          | C10H17NO4 | 214.10861   | No  |
| 2305 | HMDB0094739              | 2-hydroxyoct-2-enoylglycine                          | C10H17NO4 | 214.10861   | No  |
| 2305 | HMDB0094740              | 2-hydroxyoct-3-enoylglycine                          | C10H17NO4 | 214.10861   | No  |
| 2305 | HMDB0094741              | 2-hydroxyoct-4-enoylglycine                          | C10H17NO4 | 214.10861   | No  |
| 2305 | HMDB0094742              | 2-hydroxyoct-5-enoylglycine                          | C10H17NO4 | 214.10861   | No  |
| 2305 | HMDB0094743              | 2-hydroxyoct-6-enoylglycine                          | C10H17NO4 | 214.10861   | No  |
| 2305 | HMDB0094744              | 2-hydroxyoct-7-enoylglycine                          | C10H17NO4 | 214.10861   | No  |
| 2305 | HMDB0094745              | 3-hydroxyoct-1-enoylglycine                          | C10H17NO4 | 214.10861   | No  |
| 2305 | HMDB0094746              | 3-hydroxyoct-2-enoylglycine                          | C10H17NO4 | 214.10861   | No  |
| 2305 | HMDB0094747              | 3-hydroxyoct-3-enoylglycine                          | C10H17NO4 | 214.10861   | No  |
| 2305 | HMDB0094748              | 3-hydroxyoct-4-enoylglycine                          | C10H17NO4 | 214.10861   | No  |
| 2305 | HMDB0094749              | 3-hydroxyoct-5-enoylglycine                          | C10H17NO4 | 214.10861   | No  |
| 2305 | HMDB0094750              | 3-hydroxyoct-6-enoylglycine                          | C10H17NO4 | 214.10861   | No  |
| 2305 | HMDB0094751              | 3-hydroxyoct-7-enoylglycine                          | C10H17NO4 | 214.10861   | No  |
| 2305 | HMDB0094752              | 4-hydroxyoct-1-enoylglycine                          | C10H17NO4 | 214.10861   | No  |
| 2305 | HMDB0094753              | 4-hydroxyoct-2-enoylglycine                          | C10H17NO4 | 214.10861   | No  |
| 2305 | HMDB0094754              | 4-hydroxyoct-3-enoylglycine                          | C10H17NO4 | 214.10861   | No  |
| 2305 | HMDB0094755              | 4-hydroxyoct-4-enoylglycine                          | C10H17NO4 | 214.10861   | No  |
| 2305 | HMDB0094756              | 4-hydroxyoct-5-enoylglycine                          | C10H17NO4 | 214.10861   | No  |
| 2305 | HMDB0094757              | 4-hydroxyoct-6-enoylglycine                          | C10H17NO4 | 214.10861   | No  |
| 2305 | HMDB0094758              | 4-hydroxyoct-7-enoylglycine                          | C10H17NO4 | 214.10861   | No  |
| 2305 | HMDB0094759              | 5-hydroxyoct-1-enoylglycine                          | C10H17NO4 | 214.10861   | No  |
| 2305 | HMDB0094760              | 5-hydroxyoct-2-enoylglycine                          | C10H17NO4 | 214.10861   | No  |
| 2305 | HMDB0094761              | 5-hydroxyoct-3-enoylglycine                          | C10H17NO4 | 214.10861   | No  |
| 2305 | HMDB0094762              | 5-hydroxyoct-4-enoylglycine                          | C10H17NO4 | 214.10861   | No  |
| 2305 | HMDB0094763              | 5-hydroxyoct-5-enoylglycine                          | C10H17NO4 | 214.10861   | No  |
| 2305 | HMDB0094764              | 5-hydroxyoct-6-enoylglycine                          | C10H17NO4 | 214.10861   | No  |
| 2305 | HMDB0094765              | 5-hydroxyoct-7-enoylglycine                          | C10H17NO4 | 214.10861   | No  |
| 2305 | HMDB0094766              | 6-hydroxyoct-1-enoylglycine                          | C10H17NO4 | 214.10861   | No  |
| 2305 | HMDB0094767              | 6-hydroxyoct-2-enoylglycine                          | C10H17NO4 | 214.10861   | No  |
| 2305 | HMDB0094768              | 6-hydroxyoct-3-enoylglycine                          | C10H17NO4 | 214.10861   | No  |
| 2305 | HMDB0094769              | 6-hydroxyoct-4-enoylglycine                          | C10H17NO4 | 214.10861   | No  |
| 2305 | HMDB0094770              | 6-hydroxyoct-5-enoylglycine                          | C10H17NO4 | 214.10861   | No  |
| 2305 | HMDB0094771              | 6-hydroxyoct-6-enoylglycine                          | C10H17NO4 | 214.10861   | No  |
| 2305 | HMDB0094772              | 6-hydroxyoct-7-enoylglycine                          | C10H17NO4 | 214.10861   | No  |
| 2305 | HMDB0094773              | 7-hydroxyoct-1-enoylglycine                          | C10H17NO4 | 214.10861   | No  |
| 2305 | HMDB0094774              | 7-hydroxyoct-2-enoylglycine                          | C10H17NO4 | 214.10861   | No  |
| 2305 | HMDB0094775              | 7-hydroxyoct-3-enoylglycine                          | C10H17NO4 | 214.10861   | No  |
| 2305 | HMDB0094776              | 7-hydroxyoct-4-enoylglycine                          | C10H17NO4 | 214.10861   | No  |
| 2305 | HMDB0094777              | 7-hydroxyoct-5-enoylglycine                          | C10H17NO4 | 214.10861   | No  |
| 2305 | HMDB0094778              | 7-hydroxyoct-6-enoylglycine                          | C10H17NO4 | 214.10861   | No  |
| 2305 | HMDB0094779              | 7-hydroxyoct-7-enoylglycine                          | C10H17NO4 | 214.10861   | No  |
| 2309 | HMDB0013279; CHEBI:74439 | N-Nonanoylglycine                                    | C11H21NO3 | 214.1451075 | No  |
| 2329 | HMDB0013989              | O-Desmethylnaproxen                                  | C13H12O3  | 215.0715745 | No  |
| 2329 | HMDB0030647              | Artemidinol                                          | C13H12O3  | 215.0715745 | No  |
| 2329 | HMDB0032035              | 6-(3,4-Methylenedioxyphenyl)-3,5-hexadien-2-one      | C13H12O3  | 215.0715745 | No  |
| 2329 | HMDB0032656              | (Z)-6-(2-Methoxyvinyl)-7-methyl-2H-1-benzopyran-2-o  | C13H12O3  | 215.0715745 | No  |
| 2329 | HMDB0037723              | 2-Phenylethyl 2-furancarboxylate                     | C13H12O3  | 215.0715745 | No  |
| 2329 | HMDB0038017              | Ethyl 2-phenyl-3-furancarboxylate                    | C13H12O3  | 215.0715745 | No  |
| 2329 | HMDB0130028              | 3-[(1E)-3-hydroxybut-1-en-1-yl]-1H-isochromen-1-one  | C13H12O3  | 215.0715745 | No  |
| 2329 | HMDB0130029              | 3-[(1E)-but-1-en-1-yl]-7-hydroxy-1H-isochromen-1-one | C13H12O3  | 215.0715745 | No  |
| 2329 | HMDB0130030              | 3-[(1E)-but-1-en-1-yl]-6-hydroxy-1H-isochromen-1-one | C13H12O3  | 215.0715745 | No  |
| 2329 | HMDB0130031              | 3-(3-ethyloxiran-2-yl)-1H-isochromen-1-one           | C13H12O3  | 215.0715745 | No  |
| 2329 | HMDB0130032              | 3-[(1E)-but-1-en-1-yl]-5-hydroxy-1H-isochromen-1-one | C13H12O3  | 215.0715745 | No  |
| 2329 | HMDB0130033              | 3-[(1E)-4-hydroxybut-1-en-1-yl]-1H-isochromen-1-one  | C13H12O3  | 215.0715745 | No  |
| 2332 | HMDB0029027              | Prolyl-Threonine                                     | C9H16N2O4 | 215.1038441 | Yes |
| 2332 | HMDB0029069              | Threoninyl-Proline                                   | C9H16N2O4 | 215.1038441 | Yes |
| 2332 | HMDB0038239              | Sakacin P                                            | C9H16N2O4 | 215.1038441 | Yes |
| 2333 | HMDB0029837              | Nb-Acetyl-Nb-methyltryptamine                        | C13H16N2O | 215.1210638 | Yes |

|      |                                      |                                                       |            |             |     |
|------|--------------------------------------|-------------------------------------------------------|------------|-------------|-----|
| 2333 | HMDB0034292                          | Nb-Methyltetrahydroharmol                             | C13H16N2O  | 215.1210638 | Yes |
| 2333 | HMDB0034910                          | (R)-2-Amino-N-(2,2,4,4-tetramethyl-3-thietanyl)propan | C10H20N2OS | 215.1210638 | Yes |
| 2334 | HMDB0000888; CHEBI:73713             | Undecanedioic acid                                    | C11H20O4   | 215.1290091 | Yes |
| 2334 | HMDB0037137                          | Butyl butyryllactate                                  | C11H20O4   | 215.1290091 | Yes |
| 2336 | HMDB0029140                          | Valyl-Valine                                          | C10H20N2O3 | 215.140246  | Yes |
| 2338 | HMDB0000387; CHEBI:36206             | 3-Hydroxydodecanoic acid                              | C12H24O3   | 215.1665662 | No  |
| 2338 | HMDB0002059; C08317; CHEBI:39567     | 12-Hydroxydodecanoic acid                             | C12H24O3   | 215.1665662 | No  |
| 2338 | HMDB0010728; CHEBI:43197             | (R)-3-Hydroxydodecanoic acid                          | C12H24O3   | 215.1665662 | No  |
| 2338 | HMDB0040169                          | xi-5-Hydroxydodecanoic acid                           | C12H24O3   | 215.1665662 | No  |
| 2356 | HMDB0006409; CHEBI:133530            | Tyramine-O-sulfate                                    | C8H11NO4S  | 216.0343398 | No  |
| 2358 | HMDB0015328; CHEBI:3380              | Captopril                                             | C9H15NO3S  | 216.0706014 | No  |
| 2360 | HMDB0038447                          | 1-Isothiocyanato-8-(methylthio)octane                 | C10H19NS2  | 216.0880083 | Yes |
| 2361 | HMDB0000856; C15532; CHEBI:49006     | N-a-Acetylcitrulline                                  | C8H15N3O4  | 216.0992152 | No  |
| 2361 | HMDB0028685                          | Alanyl-Glutamine                                      | C8H15N3O4  | 216.0992152 | No  |
| 2361 | HMDB0028701                          | Alanyl-Gamma-glutamate                                | C8H15N3O4  | 216.0992152 | No  |
| 2361 | HMDB0028790                          | Glutaminylalanine                                     | C8H15N3O4  | 216.0992152 | No  |
| 2361 | HMDB0029189                          | 5-Hydroxysebacate                                     | C10H17O5   | 216.0992152 | No  |
| 2363 | HMDB0000824; C03017; CHEBI:28867     | Propionylcarnitine                                    | C10H19NO4  | 216.12427   | Yes |
| 2363 | HMDB0062514; CHEBI:53210             | O-propanoyl-carnitine                                 | C10H19NO4  | 216.12427   | Yes |
| 2380 | HMDB0011725; C16199; CHEBI:480324    | 5-Sulfosalicylic acid                                 | C7H6O6S    | 216.9813061 | Yes |
| 2380 | HMDB0059968                          | 3-hydroxybenzoic acid-3-O-sulphate                    | C7H6O6S    | 216.9813061 | Yes |
| 2380 | HMDB0059982; CHEBI:88700             | 4-hydroxybenzoic acid-4-O-sulphate                    | C7H6O6S    | 216.9813061 | Yes |
| 2382 | HMDB0041785                          | Tyrosol 4-sulfate                                     | C8H10O5S   | 217.0175859 | Yes |
| 2382 | HMDB0124986                          | (5-ethyl-2-hydroxyphenyl)oxidanedisulfonic acid       | C8H10O5S   | 217.0175859 | Yes |
| 2387 | HMDB0003764; HMDB0028812; CHEBI:7384 | Glutamylalanine                                       | C8H14N2O5  | 217.082561  | Yes |
| 2387 | HMDB0006248; HMDB0029142; HMDB0061   | gamma-Glutamylalanine                                 | C8H14N2O5  | 217.082561  | Yes |
| 2387 | HMDB0028872                          | Hydroxypropyl-Serine                                  | C8H14N2O5  | 217.082561  | Yes |
| 2387 | HMDB0029040                          | Seriny-Hydroxyproline                                 | C8H14N2O5  | 217.082561  | Yes |
| 2387 | HMDB0036301; CHEBI:50621             | N-gamma-L-Glutamyl-D-alanine                          | C8H14N2O5  | 217.082561  | Yes |
| 2388 | HMDB0000350; CHEBI:89182             | 3-Hydroxysebacic acid                                 | C10H18O5   | 217.1084562 | Yes |
| 2388 | HMDB0000424                          | 2-Hydroxydecanedioic acid                             | C10H18O5   | 217.1084562 | Yes |
| 2399 | HMDB0006492; CHEBI:35422             | 4-Nitrophenyl sulfate                                 | C6H5NO6S   | 217.9774443 | Yes |
| 2407 | HMDB0028740                          | Asparaginy-Serine                                     | C7H13N3O5  | 218.0775146 | Yes |
| 2407 | HMDB0029034                          | Seriny-Asparagine                                     | C7H13N3O5  | 218.0775146 | Yes |
| 2407 | HMDB0060827                          | ID11614                                               | C11H13N3S  | 218.0775146 | Yes |
| 2407 | HMDB0061056                          | benzothiazole piperazine                              | C11H13N3S  | 218.0775146 | Yes |
| 2408 | HMDB0013988; CHEBI:235459            | N-Deschlorobenzoyl indomethacin                       | C12H13NO3  | 218.0826929 | Yes |
| 2408 | HMDB0033436                          | Nigellimine N-oxide                                   | C12H13NO3  | 218.0826929 | Yes |
| 2408 | HMDB0038338                          | alpha-Hydroxy-1-methyl-1H-indole-3-propanoic acid     | C12H13NO3  | 218.0826929 | Yes |
| 2408 | HMDB0038339                          | alpha-Methoxy-1H-indole-3-propanoic acid              | C12H13NO3  | 218.0826929 | Yes |
| 2409 | HMDB0000210; C00864; CHEBI:7916      | Pantothenic acid                                      | C9H17NO5   | 218.1039901 | Yes |
| 2409 | HMDB0012204; C00371; CHEBI:16522     | Cis-zeatin                                            | C10H13N5O  | 218.1039901 | Yes |
| 2409 | HMDB0062717; C00864; CHEBI:46905     | (R)-pantothenic Acid                                  | C9H17NO5   | 218.1039901 | Yes |
| 2423 | HMDB0030789                          | Dracunculin                                           | C11H8O5    | 219.0327181 | No  |
| 2423 | HMDB0035086                          | Buntansin A                                           | C11H8O5    | 219.0327181 | No  |
| 2423 | HMDB0036346                          | 7-Hydroxy-2-methyl-4-oxo-4H-1-benzopyran-5-carboxy    | C11H8O5    | 219.0327181 | No  |
| 2423 | HMDB0038967                          | 1-Propenyl 1-(1-propenylthio)propyl disulfide         | C9H16S3    | 219.0327181 | No  |
| 2423 | HMDB0039820                          | 8-Methoxy-6,7-methylenedioxycoumarin                  | C11H8O5    | 219.0327181 | No  |
| 2423 | HMDB0129373                          | 2-(4-methoxy-1-benzofuran-5-yl)-2-oxoacetic acid      | C11H8O5    | 219.0327181 | No  |
| 2424 | HMDB0034857                          | 2-(2-Thienylmethylene)-1,6-dioxaspiro[4.4]non-3-ene   | C12H12O2S  | 219.0461182 | No  |
| 2424 | HMDB0035149                          | Chrycorin                                             | C12H12O2S  | 219.0461182 | No  |
| 2424 | HMDB0041942; C11490                  | N-Acetyl-S-(N-methylcarbamoyl)cysteine                | C7H12N2O4S | 219.0461182 | No  |
| 2425 | HMDB0059775; CHEBI:89858             | 3-Hydroxy-3-carboxymethyl-adipic acid                 | C8H12O7    | 219.0510522 | Yes |
| 2426 | HMDB0029467                          | Eugenitin                                             | C12H12O4   | 219.0662662 | Yes |
| 2426 | HMDB0029473                          | Isoeugenitin                                          | C12H12O4   | 219.0662662 | Yes |
| 2426 | HMDB0041442                          | Hispolone                                             | C12H12O4   | 219.0662662 | Yes |
| 2427 | HMDB0000472; C01017; CHEBI:28171     | 5-Hydroxy-L-tryptophan                                | C11H12N2O3 | 219.0774383 | Yes |
| 2427 | HMDB0015571; C00643; CHEBI:17780     | Oxitriptan                                            | C11H12N2O3 | 219.0774383 | Yes |
| 2427 | HMDB0061174                          | p-Hydroxyl-ethotoin                                   | C11H12N2O3 | 219.0774383 | Yes |
| 2428 | HMDB0000472; C01017; CHEBI:28171     | 5-Hydroxy-L-tryptophan                                | C11H12N2O3 | 219.0800079 | No  |
| 2428 | HMDB0013139; C14519                  | 1-Hydroxypyrene                                       | C16H12O    | 219.0800079 | No  |

|      |                                  |                                                        |            |             |     |
|------|----------------------------------|--------------------------------------------------------|------------|-------------|-----|
| 2428 | HMDB0015571; C00643; CHEBI:17780 | Oxitriptan                                             | C11H12N2O3 | 219.0800079 | No  |
| 2428 | HMDB0028693                      | Alanyl-Methionine                                      | C8H16N2O3S | 219.0800079 | No  |
| 2428 | HMDB0028788                      | Cysteinyl-Valine                                       | C8H16N2O3S | 219.0800079 | No  |
| 2428 | HMDB0028966                      | Methionyl-Alanine                                      | C8H16N2O3S | 219.0800079 | No  |
| 2428 | HMDB0029124                      | Valyl-Cysteine                                         | C8H16N2O3S | 219.0800079 | No  |
| 2428 | HMDB0061174                      | p-Hydroxyl-ethotoin                                    | C11H12N2O3 | 219.0800079 | No  |
| 2429 | HMDB0060724                      | 2,4-Diamino-6,7-dimethoxyquinazoline                   | C10H12N4O2 | 219.0870669 | Yes |
| 2430 | HMDB0032589                      | 1-(5-Acetyl-2-hydroxyphenyl)-3-methyl-1-butanone       | C13H16O3   | 219.1022084 | Yes |
| 2430 | HMDB0037492                      | Ethyl methyl-p-tolylglycidate                          | C13H16O3   | 219.1022084 | Yes |
| 2430 | HMDB0040424                      | Ethyl 2-benzylacetoacetate                             | C13H16O3   | 219.1022084 | Yes |
| 2430 | HMDB0061823; CHEBI:88591         | 3-Hexenyl salicylic acid                               | C13H16O3   | 219.1022084 | Yes |
| 2430 | HMDB0061942                      | cis-3-Hexenyl salicylate                               | C13H16O3   | 219.1022084 | Yes |
| 2430 | HMDB0132933                      | (1Z)-2-hydroxy-1-(4-methoxyphenyl)-4-methylpent-1-ene  | C13H16O3   | 219.1022084 | Yes |
| 2430 | HMDB0132935                      | 1-(2-hydroxy-4-methoxyphenyl)-4-methylpent-1-en-3-ol   | C13H16O3   | 219.1022084 | Yes |
| 2430 | HMDB0132936                      | 1-[3-(4-methoxyphenyl)oxiran-2-yl]-2-methylpropan-1-ol | C13H16O3   | 219.1022084 | Yes |
| 2430 | HMDB0132937                      | 5-hydroxy-1-(4-methoxyphenyl)-4-methylpent-1-en-3-ol   | C13H16O3   | 219.1022084 | Yes |
| 2430 | HMDB0132939                      | 4-hydroxy-1-(4-methoxyphenyl)-4-methylpent-1-en-3-ol   | C13H16O3   | 219.1022084 | Yes |
| 2430 | HMDB0132948                      | 1-(4-methoxyphenyl)-4-methylpentane-2,3-dione          | C13H16O3   | 219.1022084 | Yes |
| 2436 | HMDB0013688; C17915              | Nootkatol                                              | C15H24O    | 219.1744669 | No  |
| 2436 | HMDB0030232; C09720              | (2R,6S,7S,10Z)-beta-Santalal-3(15),10-dien-12-ol       | C15H24O    | 219.1744669 | No  |
| 2436 | HMDB0032220                      | Dihydronootkatone                                      | C15H24O    | 219.1744669 | No  |
| 2436 | HMDB0033826; C14693; CHEBI:34247 | 2,6-Di-tert-butyl-4-methylphenol                       | C15H24O    | 219.1744669 | No  |
| 2436 | HMDB0034661                      | alpha-Valerenol                                        | C15H24O    | 219.1744669 | No  |
| 2436 | HMDB0034718                      | Isospathulenol                                         | C15H24O    | 219.1744669 | No  |
| 2436 | HMDB0034940                      | alpha-Santal-10-en-12-ol                               | C15H24O    | 219.1744669 | No  |
| 2436 | HMDB0035020                      | Acolamone                                              | C15H24O    | 219.1744669 | No  |
| 2436 | HMDB0035026; C16945              | alpha-Cyperol                                          | C15H24O    | 219.1744669 | No  |
| 2436 | HMDB0035097                      | beta-Costol                                            | C15H24O    | 219.1744669 | No  |
| 2436 | HMDB0035306                      | Epishyobunone                                          | C15H24O    | 219.1744669 | No  |
| 2436 | HMDB0035391                      | Preisocalamendiol                                      | C15H24O    | 219.1744669 | No  |
| 2436 | HMDB0035645                      | Epoxyguaiane                                           | C15H24O    | 219.1744669 | No  |
| 2436 | HMDB0035704                      | Acorenone                                              | C15H24O    | 219.1744669 | No  |
| 2436 | HMDB0035718; C16974              | Isocyperol                                             | C15H24O    | 219.1744669 | No  |
| 2436 | HMDB0035720                      | Isoacalamone                                           | C15H24O    | 219.1744669 | No  |
| 2436 | HMDB0035739                      | (R)-2,7(14),9-Bisabolatrien-11-ol                      | C15H24O    | 219.1744669 | No  |
| 2436 | HMDB0035793                      | Fukinone                                               | C15H24O    | 219.1744669 | No  |
| 2436 | HMDB0036118                      | (3S,6E)-6-Caryophyllen-15-al                           | C15H24O    | 219.1744669 | No  |
| 2436 | HMDB0036192                      | Apritone                                               | C15H24O    | 219.1744669 | No  |
| 2436 | HMDB0036402                      | alpha-Bergamotenol                                     | C15H24O    | 219.1744669 | No  |
| 2436 | HMDB0036420                      | Spathulenol                                            | C15H24O    | 219.1744669 | No  |
| 2436 | HMDB0036716; C09720; CHEBI:10441 | beta-Santalol                                          | C15H24O    | 219.1744669 | No  |
| 2436 | HMDB0036717                      | trans-beta-Santalol                                    | C15H24O    | 219.1744669 | No  |
| 2436 | HMDB0036788                      | beta-Betulenol                                         | C15H24O    | 219.1744669 | No  |
| 2436 | HMDB0036789; C16908              | Caryophyllene alpha-oxide                              | C15H24O    | 219.1744669 | No  |
| 2436 | HMDB0036793                      | 3,15-Epoxy-6-caryophyllene                             | C15H24O    | 219.1744669 | No  |
| 2436 | HMDB0036798                      | 8alpha-3-Copaen-8-ol                                   | C15H24O    | 219.1744669 | No  |
| 2436 | HMDB0037069                      | Acoragermacrone                                        | C15H24O    | 219.1744669 | No  |
| 2436 | HMDB0037392                      | 4(15)-Copaen-11-ol                                     | C15H24O    | 219.1744669 | No  |
| 2436 | HMDB0037395                      | 11-Copaen-4-ol                                         | C15H24O    | 219.1744669 | No  |
| 2436 | HMDB0037811                      | Vetiverol                                              | C15H24O    | 219.1744669 | No  |
| 2436 | HMDB0038119                      | Eremofukinone                                          | C15H24O    | 219.1744669 | No  |
| 2436 | HMDB0038123                      | 1,5-Epoxy-4(14)-salviolene                             | C15H24O    | 219.1744669 | No  |
| 2436 | HMDB0038134                      | Bisabolene oxide                                       | C15H24O    | 219.1744669 | No  |
| 2436 | HMDB0038146                      | Calacone                                               | C15H24O    | 219.1744669 | No  |
| 2436 | HMDB0038160                      | 7(14)-Isodaucen-10-one                                 | C15H24O    | 219.1744669 | No  |
| 2436 | HMDB0038193                      | Isoshyobunone                                          | C15H24O    | 219.1744669 | No  |
| 2436 | HMDB0038208                      | Humuladienone                                          | C15H24O    | 219.1744669 | No  |
| 2436 | HMDB0038209                      | Humulene epoxide I                                     | C15H24O    | 219.1744669 | No  |
| 2436 | HMDB0038210                      | Humulene epoxide II                                    | C15H24O    | 219.1744669 | No  |
| 2436 | HMDB0038211                      | Humulenol I                                            | C15H24O    | 219.1744669 | No  |
| 2436 | HMDB0038212                      | Humulenol II                                           | C15H24O    | 219.1744669 | No  |

|      |                                   |                                                        |             |             |     |
|------|-----------------------------------|--------------------------------------------------------|-------------|-------------|-----|
| 2436 | HMDB0038512                       | Bisaculol                                              | C15H24O     | 219.1744669 | No  |
| 2436 | HMDB0038982; C14550; CHEBI:34440  | 4-Nonylphenol                                          | C15H24O     | 219.1744669 | No  |
| 2436 | HMDB0039532                       | (6Z,9Z,12Z)-6,9,12-Pentadecatrien-2-one                | C15H24O     | 219.1744669 | No  |
| 2436 | HMDB0039711                       | Aromadendrene epoxide                                  | C15H24O     | 219.1744669 | No  |
| 2436 | HMDB0040763                       | Italicene ether                                        | C15H24O     | 219.1744669 | No  |
| 2436 | HMDB0059836                       | Cabreuva oxide D                                       | C15H24O     | 219.1744669 | No  |
| 2436 | HMDB0060356; CHEBI:15894          | 2-trans,6-trans-Farnesal                               | C15H24O     | 219.1744669 | No  |
| 2436 | HMDB0134152                       | 2-benzyl-octan-1-ol                                    | C15H24O     | 219.1744669 | No  |
| 2453 | HMDB0002135                       | S-(3-oxo-3-carboxy-n-propyl)cysteine                   | C7H11NO5S   | 220.0285316 | No  |
| 2456 | HMDB0038990                       | Methyl 5-hydroxyoxindole-3-acetate                     | C11H11NO4   | 220.0636227 | Yes |
| 2456 | HMDB0038991                       | Methyl dioxindole-3-acetate                            | C11H11NO4   | 220.0636227 | Yes |
| 2456 | HMDB0062182                       | N-lactoyl-Methionine                                   | C8H15NO4S   | 220.0636227 | Yes |
| 2459 | HMDB0000389                       | 2''-Deoxysepiapterin                                   | C9H11N5O2   | 220.084792  | Yes |
| 2462 | HMDB0030305; C10142               | Dioscorine                                             | C13H19NO2   | 220.1362859 | No  |
| 2462 | HMDB0060850                       | N,N,O-Tridesmethyl-tramadol                            | C13H19NO2   | 220.1362859 | No  |
| 2476 | HMDB0014957; C06805; CHEBI:27690  | Acetazolamide                                          | C4H6N4O3S2  | 220.9813616 | Yes |
| 2480 | HMDB0128662                       | 3-(6-hydroxy-7-methoxy-2H-1,3-benzodioxol-5-yl)prop    | C11H10O5    | 221.0434554 | Yes |
| 2480 | HMDB0128663                       | 3-(7-hydroxy-6-methoxy-2H-1,3-benzodioxol-5-yl)prop    | C11H10O5    | 221.0434554 | Yes |
| 2480 | HMDB0132247                       | 8-hydroxy-6,7-dimethoxy-2H-chromen-2-one               | C11H10O5    | 221.0434554 | Yes |
| 2480 | HMDB0132248                       | 5-hydroxy-6,7-dimethoxy-2H-chromen-2-one               | C11H10O5    | 221.0434554 | Yes |
| 2480 | HMDB0136673                       | 6-hydroxy-5,7-dimethoxy-2H-chromen-2-one               | C11H10O5    | 221.0434554 | Yes |
| 2481 | HMDB0010325; CHEBI:87248          | Ethyl glucuronide                                      | C8H14O7     | 221.0670782 | No  |
| 2481 | HMDB0125202                       | (3,4,5,6-tetrahydroxyoxan-2-yl)methyl acetate          | C8H14O7     | 221.0670782 | No  |
| 2481 | HMDB0131286                       | 6-ethoxy-3,4,5-trihydroxyoxane-2-carboxylic acid       | C8H14O7     | 221.0670782 | No  |
| 2513 | HMDB0004083; C05645               | 4-(2-Amino-3-hydroxyphenyl)-2,4-dioxobutanoic acid     | C10H9NO5    | 222.0410817 | Yes |
| 2513 | HMDB0038941                       | (R)-2,3-Dihydro-3,5-dihydroxy-2-oxo-3-indoleacetic aci | C10H9NO5    | 222.0410817 | Yes |
| 2513 | HMDB0039495; C03147; CHEBI:52430  | 2-(Malonylamino)benzoic acid                           | C10H9NO5    | 222.0410817 | Yes |
| 2513 | HMDB0129380                       | 2-[[[(2H-1,3-benzodioxol-5-yl)(hydroxy)methylidene]ar  | C10H9NO5    | 222.0410817 | Yes |
| 2518 | HMDB0062375; C19602               | 4-(Methylnitrosamino)-1-(1-oxido-3-pyridinyl)-1-butan  | C10H13N3O3  | 222.0890052 | No  |
| 2518 | HMDB0062382; C19563; CHEBI:82561  | 4-[(Hydroxymethyl)nitrosoamino]-1-(3-pyridinyl)-1-but  | C10H13N3O3  | 222.0890052 | No  |
| 2518 | HMDB0062404; C19566               | 4-Hydroxy-4-(methylnitrosoamino)-1-(3-pyridinyl)-1-bu  | C10H13N3O3  | 222.0890052 | No  |
| 2520 | HMDB0015168; C12058; CHEBI:171741 | Cerulenin                                              | C12H17NO3   | 222.1139505 | Yes |
| 2521 | HMDB0004087; C05201; CHEBI:16804  | 1-Benzyl-1,2,3,4-tetrahydroisoquinoline                | C16H17N     | 222.1282309 | No  |
| 2522 | HMDB0029828                       | Dihydrodioscorine                                      | C13H21NO2   | 222.1501942 | No  |
| 2522 | HMDB0029875; C10868               | Tigloidine                                             | C13H21NO2   | 222.1501942 | No  |
| 2522 | HMDB0030268                       | Dumetorine                                             | C13H21NO2   | 222.1501942 | No  |
| 2536 | HMDB0028772                       | Cysteinyl-Cysteine                                     | C6H12N2O3S2 | 223.0226226 | Yes |
| 2536 | HMDB0036314                       | Dehydrochorismic acid                                  | C10H8O6     | 223.0226226 | Yes |
| 2542 | HMDB0000732; C02794; CHEBI:1547   | Hydroxykynurenine                                      | C10H12N2O4  | 223.0716543 | No  |
| 2542 | HMDB0011631; C03227; CHEBI:17380  | L-3-Hydroxykynurenine                                  | C10H12N2O4  | 223.0716543 | No  |
| 2542 | HMDB0012819; C05651; CHEBI:2076   | 5-Hydroxykynurenine                                    | C10H12N2O4  | 223.0716543 | No  |
| 2542 | HMDB0014787; C07312; CHEBI:63581  | Stavudine                                              | C10H12N2O4  | 223.0716543 | No  |
| 2542 | HMDB0029397                       | L-Nicotianine                                          | C10H12N2O4  | 223.0716543 | No  |
| 2543 | HMDB0004328; CHEBI:336245         | Temurin                                                | C9H12N4O3   | 223.0810528 | Yes |
| 2544 | HMDB0030379                       | N-Methoxy-1-vinyl-beta-carboline                       | C14H12N2O   | 223.0872528 | No  |
| 2545 | HMDB0030680                       | Diplosporin                                            | C12H16O4    | 223.0968423 | Yes |
| 2545 | HMDB0030703                       | Dhelwanging                                            | C12H16O4    | 223.0968423 | Yes |
| 2545 | HMDB0032552                       | Vanillin 1,2-butylene glycol acetal                    | C12H16O4    | 223.0968423 | Yes |
| 2545 | HMDB0032663                       | Acoramone                                              | C12H16O4    | 223.0968423 | Yes |
| 2545 | HMDB0036203                       | 2-Ethoxy-4-(4-methyl-1,3-dioxolan-2-yl)phenol          | C12H16O4    | 223.0968423 | Yes |
| 2545 | HMDB0040629                       | Isoacoramone                                           | C12H16O4    | 223.0968423 | Yes |
| 2545 | HMDB0040890                       | 3'',4'',5''-Trimethoxycinnamyl alcohol                 | C12H16O4    | 223.0968423 | Yes |
| 2545 | HMDB0124917                       | 2-(4-hydroxy-3-methylbut-2-en-1-yl)-5-methoxybenzer    | C12H16O4    | 223.0968423 | Yes |
| 2545 | HMDB0124919                       | 6-methoxy-3-(3-methylbut-2-en-1-yl)benzene-1,2,4-tri   | C12H16O4    | 223.0968423 | Yes |
| 2545 | HMDB0124920                       | 2-[(3,3-dimethyloxiran-2-yl)methyl]-5-methoxybenzenr   | C12H16O4    | 223.0968423 | Yes |
| 2545 | HMDB0125801                       | 7-methoxy-2,2-dimethyl-3,4-dihydro-2H-1-benzopyran     | C12H16O4    | 223.0968423 | Yes |
| 2545 | HMDB0127761                       | 5-(4-hydroxy-3-methoxyphenyl)pentanoic acid            | C12H16O4    | 223.0968423 | Yes |
| 2545 | HMDB0127765                       | 4-hydroxy-5-(3-methoxyphenyl)pentanoic acid            | C12H16O4    | 223.0968423 | Yes |
| 2545 | HMDB0135709                       | 4-(4-hydroxy-3,5-dimethoxyphenyl)butan-2-one           | C12H16O4    | 223.0968423 | Yes |
| 2546 | HMDB0014386; CHEBI:102524         | Butalbital                                             | C11H16N2O3  | 223.108904  | No  |
| 2547 | HMDB0029670                       | Epoxyeremopetasinorol                                  | C13H20O3    | 223.1340789 | Yes |

|      |                                   |                                                      |            |             |     |
|------|-----------------------------------|------------------------------------------------------|------------|-------------|-----|
| 2547 | HMDB0032679                       | Annunonone A                                         | C13H20O3   | 223.1340789 | Yes |
| 2547 | HMDB0032689                       | Annunonone C                                         | C13H20O3   | 223.1340789 | Yes |
| 2547 | HMDB0034564                       | 13-Oxo-9,11-tridecadienoic acid                      | C13H20O3   | 223.1340789 | Yes |
| 2547 | HMDB0036583; C11512; CHEBI:15929  | Methyl jasmonate                                     | C13H20O3   | 223.1340789 | Yes |
| 2547 | HMDB0037244                       | (8alpha,10beta,11beta)-3-Hydroxy-4,15-dinor-1(5)-xan | C13H20O3   | 223.1340789 | Yes |
| 2547 | HMDB0037726                       | Octyl 2-furoate                                      | C13H20O3   | 223.1340789 | Yes |
| 2547 | HMDB0037730                       | Furfuryl octanoate                                   | C13H20O3   | 223.1340789 | Yes |
| 2547 | HMDB0037736                       | 3-Methylbutyl 2-furanbutanoate                       | C13H20O3   | 223.1340789 | Yes |
| 2547 | HMDB0112084                       | 3-Methyl-5-pentyl-2-furanpropanoic acid              | C13H20O3   | 223.1340789 | Yes |
| 2563 | HMDB0014752; C07999; CHEBI:5195   | Furazolidone                                         | C8H7N3O5   | 224.0322445 | No  |
| 2563 | HMDB0032558                       | Dinitolmide                                          | C8H7N3O5   | 224.0322445 | No  |
| 2564 | HMDB0037264                       | 2-Hydroxy-4,7-dimethoxy-2H-1,4-benzoxazin-3(4H)-on   | C10H11NO5  | 224.0566803 | No  |
| 2564 | HMDB0060026                       | Vanilloylglycine                                     | C10H11NO5  | 224.0566803 | No  |
| 2564 | HMDB0128032                       | 2-[[hydroxy(3-hydroxy-5-methoxyphenyl)methylidene]   | C10H11NO5  | 224.0566803 | No  |
| 2564 | HMDB0131194                       | 2-[[hydroxy(2-hydroxy-4-methoxyphenyl)methylidene]   | C10H11NO5  | 224.0566803 | No  |
| 2564 | HMDB0140926                       | 2-[[hydroxy(3-hydroxy-4-methoxyphenyl)methylidene]   | C10H11NO5  | 224.0566803 | No  |
| 2565 | HMDB0029744; CHEBI:581298         | Methyl 3-carbazolecarboxylate                        | C14H11NO2  | 224.0716563 | Yes |
| 2565 | HMDB0032983                       | 1-Hydroxy-10-methylacridone                          | C14H11NO2  | 224.0716563 | Yes |
| 2565 | HMDB0038638                       | 6-Methoxy-9H-carbazole-3-carboxaldehyde              | C14H11NO2  | 224.0716563 | Yes |
| 2565 | HMDB0038849; C09228               | Murrayanine                                          | C14H11NO2  | 224.0716563 | Yes |
| 2565 | HMDB0041443                       | Mukolidine                                           | C14H11NO2  | 224.0716563 | Yes |
| 2566 | HMDB0014925; C06810; CHEBI:2453   | Aciclovir                                            | C8H11N5O3  | 224.0791146 | Yes |
| 2570 | HMDB0032141; C03764; CHEBI:17903  | 4-(Dimethylamino)azobenzene                          | C14H15N3   | 224.1194854 | No  |
| 2570 | HMDB0034853; C10914               | Cyprodinil                                           | C14H15N3   | 224.1194854 | No  |
| 2571 | HMDB0015009; C07129; CHEBI:683322 | Terbutaline                                          | C12H19NO3  | 224.1294819 | No  |
| 2593 | HMDB0012199; C00251; CHEBI:17333  | Chorismate                                           | C10H10O6   | 225.0385539 | Yes |
| 2593 | HMDB0012283; C00254; CHEBI:16666  | Prephenate                                           | C10H10O6   | 225.0385539 | Yes |
| 2593 | HMDB0033842                       | 3,4-Dimethoxy-1,2-benzenedicarboxylic acid           | C10H10O6   | 225.0385539 | Yes |
| 2593 | HMDB0033893                       | 4,5-Dimethoxy-1,2-benzenedicarboxylic acid           | C10H10O6   | 225.0385539 | Yes |
| 2593 | HMDB0125585                       | 3-(2,3,4-trihydroxy-5-methoxyphenyl)prop-2-enoic aci | C10H10O6   | 225.0385539 | Yes |
| 2593 | HMDB0125586                       | 3-(2,4,5-trihydroxy-3-methoxyphenyl)prop-2-enoic aci | C10H10O6   | 225.0385539 | Yes |
| 2593 | HMDB0125587                       | 3-(3,4-dihydroxy-5-methoxyphenyl)oxirane-2-carboxyli | C10H10O6   | 225.0385539 | Yes |
| 2593 | HMDB0126510                       | 3-(3,4-dihydroxy-5-methoxyphenyl)-2-oxopropanoic ac  | C10H10O6   | 225.0385539 | Yes |
| 2594 | HMDB0032998                       | 2-Methoxyxanthone                                    | C14H10O3   | 225.0559499 | No  |
| 2594 | HMDB0033925                       | Oroselone                                            | C14H10O3   | 225.0559499 | No  |
| 2595 | HMDB0011105; CHEBI:32643          | 5-Acetylamino-6-formylamino-3-methyluracil           | C8H10N4O4  | 225.0634698 | No  |
| 2596 | HMDB0033251                       | Phenylmethyl benzoacetate                            | C15H14O2   | 225.0926071 | Yes |
| 2596 | HMDB0033946                       | 2-Phenylethyl benzoate                               | C15H14O2   | 225.0926071 | Yes |
| 2596 | HMDB0041564                       | p-Tolyl phenylacetate                                | C15H14O2   | 225.0926071 | Yes |
| 2596 | HMDB0130334                       | 4-[(2E)-3-phenylprop-2-en-1-yl]benzene-1,3-diol      | C15H14O2   | 225.0926071 | Yes |
| 2596 | HMDB0130984                       | 3-methoxy-5-[(E)-2-phenylethenyl]phenol              | C15H14O2   | 225.0926071 | Yes |
| 2596 | HMDB0135209                       | 3-hydroxy-1,3-diphenylpropan-1-one                   | C15H14O2   | 225.0926071 | Yes |
| 2596 | HMDB0135210                       | 1-(3-hydroxyphenyl)-3-phenylpropan-1-one             | C15H14O2   | 225.0926071 | Yes |
| 2596 | HMDB0135211                       | 3-(3-hydroxyphenyl)-1-phenylpropan-1-one             | C15H14O2   | 225.0926071 | Yes |
| 2596 | HMDB0135212                       | 1-(4-hydroxyphenyl)-3-phenylpropan-1-one             | C15H14O2   | 225.0926071 | Yes |
| 2596 | HMDB0135213                       | 3-(4-hydroxyphenyl)-1-phenylpropan-1-one             | C15H14O2   | 225.0926071 | Yes |
| 2596 | HMDB0135214                       | 1-(2-hydroxyphenyl)-3-phenylpropan-1-one             | C15H14O2   | 225.0926071 | Yes |
| 2596 | HMDB0135215                       | 3-(2-hydroxyphenyl)-1-phenylpropan-1-one             | C15H14O2   | 225.0926071 | Yes |
| 2596 | HMDB0135540                       | 1-hydroxy-1,3-diphenylpropan-2-one                   | C15H14O2   | 225.0926071 | Yes |
| 2596 | HMDB0135541                       | 1-(3-hydroxyphenyl)-3-phenylpropan-2-one             | C15H14O2   | 225.0926071 | Yes |
| 2596 | HMDB0135542                       | 1-(4-hydroxyphenyl)-3-phenylpropan-2-one             | C15H14O2   | 225.0926071 | Yes |
| 2596 | HMDB0135543                       | 1-(2-hydroxyphenyl)-3-phenylpropan-2-one             | C15H14O2   | 225.0926071 | Yes |
| 2596 | HMDB0135589                       | 4-(3-hydroxy-3-phenylprop-1-en-1-yl)phenol           | C15H14O2   | 225.0926071 | Yes |
| 2596 | HMDB0141210                       | 3-phenyl-3,4-dihydro-2H-1-benzopyran-7-ol            | C15H14O2   | 225.0926071 | Yes |
| 2597 | HMDB0040705                       | Allixin                                              | C12H18O4   | 225.1128525 | Yes |
| 2597 | HMDB0059729; CHEBI:89935          | 3,4-Methylenesuccinic acid                           | C12H18O4   | 225.1128525 | Yes |
| 2598 | HMDB0014457; C07422; CHEBI:7983   | Pentobarbital                                        | C11H18N2O3 | 225.1249618 | Yes |
| 2598 | HMDB0015440; C07536; CHEBI:2673   | Amobarbital                                          | C11H18N2O3 | 225.1249618 | Yes |
| 2599 | HMDB0031740; CHEBI:89741          | Methyl dihydrojasmonate                              | C13H22O3   | 225.1500027 | No  |
| 2599 | HMDB0037562                       | Riesling acetal                                      | C13H22O3   | 225.1500027 | No  |
| 2599 | HMDB0040615                       | 4,5-Dihydrovomifolol                                 | C13H22O3   | 225.1500027 | No  |

|      |                                   |                                                    |            |             |     |
|------|-----------------------------------|----------------------------------------------------|------------|-------------|-----|
| 2601 | HMDB0000499                       | 5-Tetradecenoic acid                               | C14H26O2   | 225.1860159 | No  |
| 2601 | HMDB0000521; CHEBI:70716          | 5Z-Tetradecenoic acid                              | C14H26O2   | 225.1860159 | No  |
| 2601 | HMDB0002000; C08322; CHEBI:27781  | Myristoleic acid                                   | C14H26O2   | 225.1860159 | No  |
| 2601 | HMDB0005051                       | Tsuzuic acid                                       | C14H26O2   | 225.1860159 | No  |
| 2601 | HMDB0010732; CHEBI:37271          | trans-Tetra-dec-2-enoic acid                       | C14H26O2   | 225.1860159 | No  |
| 2601 | HMDB0030921                       | (R)-14-Methyloxacyclotetradecan-2-one              | C14H26O2   | 225.1860159 | No  |
| 2601 | HMDB0031029                       | Ethyl (E)-2-dodecenoate                            | C14H26O2   | 225.1860159 | No  |
| 2601 | HMDB0031073                       | 12-Methyl-13-tridecanolide                         | C14H26O2   | 225.1860159 | No  |
| 2601 | HMDB0032152                       | Acetaldehyde di-cis-3-hexenyl acetal               | C14H26O2   | 225.1860159 | No  |
| 2601 | HMDB0032321                       | 2-Hexenyl octanoate                                | C14H26O2   | 225.1860159 | No  |
| 2601 | HMDB0034561; C16947               | Houttuynin                                         | C14H26O2   | 225.1860159 | No  |
| 2601 | HMDB0037188                       | Rhodinyl butyrate                                  | C14H26O2   | 225.1860159 | No  |
| 2601 | HMDB0037189                       | Rhodinyl isobutyrate                               | C14H26O2   | 225.1860159 | No  |
| 2601 | HMDB0037227                       | Citronellyl butyrate                               | C14H26O2   | 225.1860159 | No  |
| 2601 | HMDB0037228                       | Citronellyl isobutyrate                            | C14H26O2   | 225.1860159 | No  |
| 2601 | HMDB0037369                       | Butyl 2-decenoate                                  | C14H26O2   | 225.1860159 | No  |
| 2601 | HMDB0037633                       | xi-Tetrahydro-3-nonyl-2H-pyran-2-one               | C14H26O2   | 225.1860159 | No  |
| 2601 | HMDB0038056                       | delta-Tetradecalactone                             | C14H26O2   | 225.1860159 | No  |
| 2601 | HMDB0040228                       | 1,1-Diethoxy-3,7-dimethyl-2,6-octadiene            | C14H26O2   | 225.1860159 | No  |
| 2601 | HMDB0062243; CHEBI:53206          | 7Z-tetradecenoic acid                              | C14H26O2   | 225.1860159 | No  |
| 2601 | HMDB0062248; CHEBI:131381         | 9E-tetradecenoic acid                              | C14H26O2   | 225.1860159 | No  |
| 2601 | HMDB0094671                       | Heptyl cyclohexane carboxylic acid                 | C14H26O2   | 225.1860159 | No  |
| 2618 | HMDB0030218                       | Lansine                                            | C13H9NO3   | 226.0505534 | No  |
| 2618 | HMDB0030319                       | Mukeic acid                                        | C13H9NO3   | 226.0505534 | No  |
| 2643 | HMDB0001343; C01107; CHEBI:17436  | Mevalonic acid-5P                                  | C6H13O7P   | 227.0298269 | No  |
| 2644 | HMDB0013695; CHEBI:1280327        | Urolithin A                                        | C13H8O4    | 227.0352837 | No  |
| 2644 | HMDB0030723; C10054; CHEBI:411468 | 1,5-Dihydroxyxanthone                              | C13H8O4    | 227.0352837 | No  |
| 2644 | HMDB0030724; C10061; CHEBI:475123 | Euxanthone                                         | C13H8O4    | 227.0352837 | No  |
| 2644 | HMDB0142418                       | 3,9-dihydroxy-6H-benzo[c]chromen-6-one             | C13H8O4    | 227.0352837 | No  |
| 2644 | HMDB0142421                       | 3,4-dihydroxy-6H-benzo[c]chromen-6-one             | C13H8O4    | 227.0352837 | No  |
| 2644 | HMDB0142422                       | 1,3-dihydroxy-6H-benzo[c]chromen-6-one             | C13H8O4    | 227.0352837 | No  |
| 2646 | HMDB0125034                       | 2-(2,3,5-trihydroxy-4-methoxyphenyl)propanoic acid | C10H12O6   | 227.0563284 | Yes |
| 2646 | HMDB0125049                       | 2-(2,3,6-trihydroxy-4-methoxyphenyl)propanoic acid | C10H12O6   | 227.0563284 | Yes |
| 2646 | HMDB0125592                       | 3-(2,3,4-trihydroxy-5-methoxyphenyl)propanoic acid | C10H12O6   | 227.0563284 | Yes |
| 2646 | HMDB0125596                       | 3-(2,4,5-trihydroxy-3-methoxyphenyl)propanoic acid | C10H12O6   | 227.0563284 | Yes |
| 2646 | HMDB0141334                       | 2-hydroxy-3,4,5-trimethoxybenzoic acid             | C10H12O6   | 227.0563284 | Yes |
| 2646 | HMDB0142089                       | 6-hydroxy-2,3,4-trimethoxybenzoic acid             | C10H12O6   | 227.0563284 | Yes |
| 2647 | HMDB0000012; C00526; CHEBI:16450  | Deoxyuridine                                       | C9H12N2O5  | 227.068287  | Yes |
| 2647 | HMDB0015023; CHEBI:775149         | Pemirolast                                         | C10H8N6O   | 227.068287  | Yes |
| 2649 | HMDB0006695; CHEBI:74767          | Prolylhydroxyproline                               | C10H16N2O4 | 227.1040799 | No  |
| 2649 | HMDB0028871                       | Hydroxyprolyl-Proline                              | C10H16N2O4 | 227.1040799 | No  |
| 2649 | HMDB0029018                       | Prolyl-Hydroxyproline                              | C10H16N2O4 | 227.1040799 | No  |
| 2649 | HMDB0040573                       | Tetraacetylenediamine                              | C10H16N2O4 | 227.1040799 | No  |
| 2649 | HMDB0094651; CHEBI:132991         | Pyroglutamylvaline                                 | C10H16N2O4 | 227.1040799 | No  |
| 2651 | HMDB0000933; C16308; CHEBI:545687 | Traumatic acid                                     | C12H20O4   | 227.1293552 | Yes |
| 2651 | HMDB0030994                       | 5-Heptyltetrahydro-2-oxo-3-furancarboxylic acid    | C12H20O4   | 227.1293552 | Yes |
| 2653 | HMDB0035881                       | 11-Hydroxy-9-tridecenoic acid                      | C13H24O3   | 227.1655073 | No  |
| 2653 | HMDB0036139                       | Menthone 1,2-glyceryl ketal                        | C13H24O3   | 227.1655073 | No  |
| 2653 | HMDB0037212                       | Menthyl lactate                                    | C13H24O3   | 227.1655073 | No  |
| 2653 | HMDB0040004                       | Menthone 1,3-glyceryl ketal                        | C13H24O3   | 227.1655073 | No  |
| 2654 | HMDB0000806; C06424; CHEBI:28875  | Myristic acid                                      | C14H28O2   | 227.2018038 | No  |
| 2654 | HMDB0002221                       | 2,6,10-Trimethylundecanoic acid                    | C14H28O2   | 227.2018038 | No  |
| 2654 | HMDB0031072; CHEBI:43722          | 12-Methyltridecanoic acid                          | C14H28O2   | 227.2018038 | No  |
| 2654 | HMDB0032318; CHEBI:542954         | Hexanal octane-1,3-diol acetal                     | C14H28O2   | 227.2018038 | No  |
| 2654 | HMDB0032548                       | Undecanal propyleneglycol acetal                   | C14H28O2   | 227.2018038 | No  |
| 2654 | HMDB0033788; CHEBI:87427          | Ethyl dodecanoate                                  | C14H28O2   | 227.2018038 | No  |
| 2654 | HMDB0034461                       | Heptyl heptanoate                                  | C14H28O2   | 227.2018038 | No  |
| 2654 | HMDB0036216; C13798; CHEBI:34491  | Hexyl octanoate                                    | C14H28O2   | 227.2018038 | No  |
| 2654 | HMDB0037312; CHEBI:23580          | Decyl butanoate                                    | C14H28O2   | 227.2018038 | No  |
| 2654 | HMDB0037495                       | 3-Methylbutyl nonanoate                            | C14H28O2   | 227.2018038 | No  |
| 2654 | HMDB0038034                       | Nonyl isovalerate                                  | C14H28O2   | 227.2018038 | No  |

|      |                                  |                                                        |            |             |     |
|------|----------------------------------|--------------------------------------------------------|------------|-------------|-----|
| 2654 | HMDB0038969                      | Dodecyl acetate                                        | C14H28O2   | 227.2018038 | No  |
| 2654 | HMDB0059865; CHEBI:87570         | Isobutyl decanoate                                     | C14H28O2   | 227.2018038 | No  |
| 2654 | HMDB0061781; CHEBI:90062         | 10-Methyltridecanoic acid                              | C14H28O2   | 227.2018038 | No  |
| 2665 | HMDB0014847; C07065; CHEBI:63577 | Lamivudine                                             | C8H11N3O3S | 228.0448205 | No  |
| 2673 | HMDB0013126                      | Butenylcarnitine                                       | C11H19NO4  | 228.1237582 | No  |
| 2675 | HMDB0033531                      | 2,4,6,8-Decatetraenoic acid dehydropiperidide          | C15H19NO   | 228.1395865 | No  |
| 2675 | HMDB0037770                      | Neopellitorine A                                       | C15H19NO   | 228.1395865 | No  |
| 2675 | HMDB0039106                      | 2,4-Undecadiene-8,10-diynoic acid isobutylamide        | C15H19NO   | 228.1395865 | No  |
| 2691 | HMDB0000618; C00199; CHEBI:17363 | D-Ribulose 5-phosphate                                 | C5H11O8P   | 229.0093739 | No  |
| 2691 | HMDB0000868; C00231; CHEBI:16332 | Xylulose 5-phosphate                                   | C5H11O8P   | 229.0093739 | No  |
| 2691 | HMDB0001489; C00620; CHEBI:16300 | Ribose 1-phosphate                                     | C5H11O8P   | 229.0093739 | No  |
| 2691 | HMDB0001548; C00117; CHEBI:52742 | D-Ribose 5-phosphate                                   | C5H11O8P   | 229.0093739 | No  |
| 2691 | HMDB0006534; CHEBI:71687         | D-Xylulose 1-phosphate                                 | C5H11O8P   | 229.0093739 | No  |
| 2691 | HMDB0011734; C01112; CHEBI:16241 | D-Arabinose 5-phosphate                                | C5H11O8P   | 229.0093739 | No  |
| 2691 | HMDB0012195; C03906; CHEBI:15807 | Beta-L-arabinose 1-phosphate                           | C5H11O8P   | 229.0093739 | No  |
| 2692 | HMDB0127980                      | (4-ethenyl-2-methoxyphenyl)oxidanesulfonic acid        | C9H10O5S   | 229.0178394 | Yes |
| 2692 | HMDB0134048                      | {[3-(2-hydroxyphenyl)prop-2-en-1-yl]oxy}sulfonic acid  | C9H10O5S   | 229.0178394 | Yes |
| 2692 | HMDB0135258                      | [2-hydroxy-5-(prop-2-en-1-yl)phenyl]oxidanesulfonic a  | C9H10O5S   | 229.0178394 | Yes |
| 2692 | HMDB0135295                      | [(1-oxo-3-phenylpropan-2-yl)oxy]sulfonic acid          | C9H10O5S   | 229.0178394 | Yes |
| 2692 | HMDB0135297                      | (3-oxo-1-phenylpropoxy)sulfonic acid                   | C9H10O5S   | 229.0178394 | Yes |
| 2692 | HMDB0135299                      | [3-(3-oxopropyl)phenyl]oxidanesulfonic acid            | C9H10O5S   | 229.0178394 | Yes |
| 2692 | HMDB0135301                      | [4-(3-oxopropyl)phenyl]oxidanesulfonic acid            | C9H10O5S   | 229.0178394 | Yes |
| 2692 | HMDB0135303                      | {3-[(1E)-3-hydroxyprop-1-en-1-yl]phenyl}oxidanesulfor  | C9H10O5S   | 229.0178394 | Yes |
| 2692 | HMDB0135304                      | {[(2E)-3-(3-hydroxyphenyl)prop-2-en-1-yl]oxy}sulfonic  | C9H10O5S   | 229.0178394 | Yes |
| 2692 | HMDB0135306                      | {4-[(1E)-3-hydroxyprop-1-en-1-yl]phenyl}oxidanesulfor  | C9H10O5S   | 229.0178394 | Yes |
| 2692 | HMDB0135307                      | {[(2E)-3-(4-hydroxyphenyl)prop-2-en-1-yl]oxy}sulfonic  | C9H10O5S   | 229.0178394 | Yes |
| 2692 | HMDB0135311                      | [(3-phenyloxiran-2-yl)methoxy]sulfonic acid            | C9H10O5S   | 229.0178394 | Yes |
| 2692 | HMDB0135656                      | [4-(3-hydroxyprop-1-en-1-yl)phenyl]oxidanesulfonic ac  | C9H10O5S   | 229.0178394 | Yes |
| 2692 | HMDB0135657                      | {[3-(4-hydroxyphenyl)prop-2-en-1-yl]oxy}sulfonic acid  | C9H10O5S   | 229.0178394 | Yes |
| 2695 | HMDB0039670                      | 3,3''-Dithiobis[4,5-dihydro-2-methylfuran]             | C10H14O2S2 | 229.0362623 | No  |
| 2696 | HMDB0062720; CHEBI:82911         | Thymol Sulfate                                         | C10H14O4S  | 229.0543441 | Yes |
| 2696 | HMDB0133674                      | (2-methyl-3-phenylpropoxy)sulfonic acid                | C10H14O4S  | 229.0543441 | Yes |
| 2698 | HMDB0001923; C01517; CHEBI:7476  | Naproxen                                               | C14H14O3   | 229.0868968 | Yes |
| 2698 | HMDB0033184                      | Pondaplin                                              | C14H14O3   | 229.0868968 | Yes |
| 2698 | HMDB0034130; C18080              | Osthenol                                               | C14H14O3   | 229.0868968 | Yes |
| 2698 | HMDB0034212; C09947              | (R)-Kawain                                             | C14H14O3   | 229.0868968 | Yes |
| 2698 | HMDB0039097; C10253              | Demethylbatatasin IV                                   | C14H14O3   | 229.0868968 | Yes |
| 2698 | HMDB0129921                      | 5-[2-(3-hydroxyphenyl)ethyl]benzene-1,3-diol           | C14H14O3   | 229.0868968 | Yes |
| 2698 | HMDB0131063                      | 7-hydroxy-3-(2-methylbut-3-en-2-yl)-2H-chromen-2-or    | C14H14O3   | 229.0868968 | Yes |
| 2698 | HMDB0142155                      | 1-(2-hydroxyphenyl)-2-phenylethane-1,2-diol            | C14H14O3   | 229.0868968 | Yes |
| 2698 | HMDB0142156                      | 1-(3-hydroxyphenyl)-2-phenylethane-1,2-diol            | C14H14O3   | 229.0868968 | Yes |
| 2698 | HMDB0142157                      | 1-(4-hydroxyphenyl)-2-phenylethane-1,2-diol            | C14H14O3   | 229.0868968 | Yes |
| 2700 | HMDB0037942                      | (1xi,3xi)-1,2,3,4-Tetrahydro-1-methyl-beta-carboline-3 | C13H14N2O2 | 229.0977242 | No  |
| 2700 | HMDB0060811                      | cyclic Melatonin                                       | C13H14N2O2 | 229.0977242 | No  |
| 2701 | HMDB0041448                      | Dicyclohexyl disulfide                                 | C12H22S2   | 229.1085319 | Yes |
| 2702 | HMDB0028876                      | Hydroxypropyl-Valine                                   | C10H18N2O4 | 229.1197539 | Yes |
| 2702 | HMDB0029128                      | Valyl-Hydroxyproline                                   | C10H18N2O4 | 229.1197539 | Yes |
| 2704 | HMDB0000623; C02678; CHEBI:4676  | Dodecanedioic acid                                     | C12H22O4   | 229.1431515 | Yes |
| 2704 | HMDB0030143                      | Talaromycin A                                          | C12H22O4   | 229.1431515 | Yes |
| 2704 | HMDB0041613; C14523              | Bis(1-methylethyl) hexanedioate                        | C12H22O4   | 229.1431515 | Yes |
| 2704 | HMDB0041614                      | Dipropyl hexanedioate                                  | C12H22O4   | 229.1431515 | Yes |
| 2705 | HMDB0028920                      | Isoleucyl-Valine                                       | C11H22N2O3 | 229.1556753 | Yes |
| 2705 | HMDB0028942                      | Leucyl-Valine                                          | C11H22N2O3 | 229.1556753 | Yes |
| 2705 | HMDB0029130                      | Valyl-Isoleucine                                       | C11H22N2O3 | 229.1556753 | Yes |
| 2705 | HMDB0029131                      | Valyl-Leucine                                          | C11H22N2O3 | 229.1556753 | Yes |
| 2706 | HMDB0036133                      | 3-[[5-Methyl-2-(1-methylethyl)cyclohexyl]oxy]-1,2-pro  | C13H26O3   | 229.1807337 | No  |
| 2706 | HMDB0061655                      | 3-hydroxytridecanoic acid                              | C13H26O3   | 229.1807337 | No  |
| 2717 | HMDB0059911; CHEBI:32635         | Paracetamol sulfate                                    | C8H9NO5S   | 230.013503  | No  |
| 2717 | HMDB0059994; CHEBI:88751         | Benzeneacetamide-4-O-sulphate                          | C8H9NO5S   | 230.013503  | No  |
| 2718 | HMDB0028744                      | Asparaginy-Valine                                      | C9H17N3O4  | 230.1150178 | Yes |
| 2718 | HMDB0029122                      | Valyl-Asparagine                                       | C9H17N3O4  | 230.1150178 | Yes |

|      |                                   |                                                        |            |             |     |
|------|-----------------------------------|--------------------------------------------------------|------------|-------------|-----|
| 2720 | HMDB0001959; CHEBI:89308          | Gamma-Aminobutyryl-lysine                              | C10H21N3O3 | 230.1500701 | No  |
| 2755 | HMDB0041646                       | 2,4-Dihydroxyacetophenone 5-sulfate                    | C8H8O6S    | 230.9972104 | Yes |
| 2755 | HMDB0041789                       | Vanillin 4-sulfate                                     | C8H8O6S    | 230.9972104 | Yes |
| 2755 | HMDB0125163                       | 2-[3-(sulfooxy)phenyl]acetic acid                      | C8H8O6S    | 230.9972104 | Yes |
| 2755 | HMDB0128010                       | (4-ethenyl-2,6-dihydroxyphenyl)oxidanesulfonic acid    | C8H8O6S    | 230.9972104 | Yes |
| 2755 | HMDB0132500                       | 2-[4-(sulfooxy)phenyl]acetic acid                      | C8H8O6S    | 230.9972104 | Yes |
| 2757 | HMDB0030813; CHEBI:549602         | Cassiachromone                                         | C13H12O4   | 231.0662012 | No  |
| 2757 | HMDB0033330                       | Dihydrocoriandrin                                      | C13H12O4   | 231.0662012 | No  |
| 2757 | HMDB0038911                       | (2S,3S,4S)-5,7,9,11-Tridecatetrayne-1,2,3,4-tetrol     | C13H12O4   | 231.0662012 | No  |
| 2757 | HMDB0041325                       | Salfredin B11                                          | C13H12O4   | 231.0662012 | No  |
| 2757 | HMDB0128959                       | 7-hydroxy-6-(3-oxobutyl)-2H-chromen-2-one              | C13H12O4   | 231.0662012 | No  |
| 2757 | HMDB0130044                       | 5-hydroxy-3-[(1E)-3-hydroxybut-1-en-1-yl]-1H-isochro   | C13H12O4   | 231.0662012 | No  |
| 2757 | HMDB0130045                       | 3-[(1E)-but-1-en-1-yl]-5,6-dihydroxy-1H-isochromen-1-  | C13H12O4   | 231.0662012 | No  |
| 2757 | HMDB0130046                       | 3-[(1E)-but-1-en-1-yl]-5,7-dihydroxy-1H-isochromen-1-  | C13H12O4   | 231.0662012 | No  |
| 2757 | HMDB0130047                       | 3-(3-ethoxiran-2-yl)-5-hydroxy-1H-isochromen-1-one     | C13H12O4   | 231.0662012 | No  |
| 2757 | HMDB0130048                       | 5-hydroxy-3-[(1E)-4-hydroxybut-1-en-1-yl]-1H-isochro   | C13H12O4   | 231.0662012 | No  |
| 2757 | HMDB0130065                       | 3-(1,2-dihydroxybut-3-en-1-yl)-1H-isochromen-1-one     | C13H12O4   | 231.0662012 | No  |
| 2757 | HMDB0135794                       | 7-(hydroxymethyl)-6-[(E)-2-methoxyethenyl]-2H-chro     | C13H12O4   | 231.0662012 | No  |
| 2757 | HMDB0135795                       | 6-(3-methoxyoxiran-2-yl)-7-methyl-2H-chromen-2-one     | C13H12O4   | 231.0662012 | No  |
| 2757 | HMDB0135796                       | 8-hydroxy-6-[(E)-2-methoxyethenyl]-7-methyl-2H-chro    | C13H12O4   | 231.0662012 | No  |
| 2757 | HMDB0135797                       | 5-hydroxy-6-[(E)-2-methoxyethenyl]-7-methyl-2H-chro    | C13H12O4   | 231.0662012 | No  |
| 2757 | HMDB0135798                       | 3-hydroxy-6-[(E)-2-methoxyethenyl]-7-methyl-2H-chro    | C13H12O4   | 231.0662012 | No  |
| 2758 | HMDB0014917; C05079; CHEBI:100147 | Nalidixic Acid                                         | C12H12N2O3 | 231.0780012 | No  |
| 2758 | HMDB0015305; CHEBI:8069           | Phenobarbital                                          | C12H12N2O3 | 231.0780012 | No  |
| 2759 | HMDB0031640                       | Glycerol 1-propanoate diacetate                        | C10H16O6   | 231.0868708 | Yes |
| 2760 | HMDB0001199; C03415; CHEBI:27574  | N2-Succinyl-L-ornithine                                | C9H16N2O5  | 231.0990294 | No  |
| 2760 | HMDB0012161; C15767; CHEBI:49260  | 4-(Glutamylamino) butanoate                            | C9H16N2O5  | 231.0990294 | No  |
| 2760 | HMDB0028766                       | Aspartyl-Valine                                        | C9H16N2O5  | 231.0990294 | No  |
| 2760 | HMDB0028873                       | Hydroxypropyl-Threonine                                | C9H16N2O5  | 231.0990294 | No  |
| 2760 | HMDB0029062                       | Threoninyl-Hydroxyproline                              | C9H16N2O5  | 231.0990294 | No  |
| 2760 | HMDB0029123                       | Valyl-Aspartate                                        | C9H16N2O5  | 231.0990294 | No  |
| 2760 | HMDB0029393; CHEBI:102630         | L-N-(3-Carboxypropyl)glutamine                         | C9H16N2O5  | 231.0990294 | No  |
| 2761 | HMDB0001389; C01598; CHEBI:16796  | Melatonin                                              | C13H16N2O2 | 231.1128613 | No  |
| 2761 | HMDB0014501; C07617; CHEBI:2654   | Aminoglutethimide                                      | C13H16N2O2 | 231.1128613 | No  |
| 2764 | HMDB0013075                       | Spermic acid 2                                         | C10H20N2O4 | 231.1354314 | No  |
| 2764 | HMDB0028917                       | Isoleucyl-Threonine                                    | C10H20N2O4 | 231.1354314 | No  |
| 2764 | HMDB0028939                       | Leucyl-Threonine                                       | C10H20N2O4 | 231.1354314 | No  |
| 2764 | HMDB0029064                       | Threoninyl-Isoleucine                                  | C10H20N2O4 | 231.1354314 | No  |
| 2764 | HMDB0029065                       | Threoninyl-Leucine                                     | C10H20N2O4 | 231.1354314 | No  |
| 2788 | HMDB0029038                       | Serinyl-Glutamate                                      | C8H13N2O6  | 232.0696217 | No  |
| 2790 | HMDB0035923; CHEBI:91152          | Hirsutin                                               | C10H19NOS2 | 232.083836  | No  |
| 2791 | HMDB0139876                       | 3-(4-hydroxyphenyl)-N-(4-oxobutyl)prop-2-enimidic ac   | C13H15NO3  | 232.099853  | No  |
| 2792 | HMDB0040033                       | 2-Heptylbenzothiazole                                  | C14H19NS   | 232.1157619 | No  |
| 2793 | HMDB0028960                       | Lysyl-Serine                                           | C9H19N3O4  | 232.1298606 | No  |
| 2793 | HMDB0029044                       | Serinyl-Lysine                                         | C9H19N3O4  | 232.1298606 | No  |
| 2793 | HMDB0029447                       | Lysinoalanine                                          | C9H19N3O4  | 232.1298606 | No  |
| 2795 | HMDB0011140                       | Hypusine                                               | C10H23N3O3 | 232.1679446 | No  |
| 2812 | HMDB0033566; C16757               | Ajoene                                                 | C9H14OS3   | 233.0125445 | Yes |
| 2812 | HMDB0128030                       | (4-ethyl-2,6-dihydroxyphenyl)oxidanesulfonic acid      | C8H10O6S   | 233.0125445 | Yes |
| 2816 | HMDB0032438                       | 1-Isopropyl citrate                                    | C9H14O7    | 233.0656682 | Yes |
| 2816 | HMDB0032660                       | (2Z,4''Z)-2-(5-Methylthio-4-penten-2-ynylidene)-1,6-di | C13H14O2S  | 233.0656682 | Yes |
| 2816 | HMDB0038083                       | 2-Isopropyl citrate                                    | C9H14O7    | 233.0656682 | Yes |
| 2817 | HMDB0011169                       | L-beta-aspartyl-L-threonine                            | C8H14N2O6  | 233.0807682 | No  |
| 2817 | HMDB0028763                       | Aspartyl-Threonine                                     | C8H14N2O6  | 233.0807682 | No  |
| 2817 | HMDB0028828; CHEBI:73509          | Glutamylserine                                         | C8H14N2O6  | 233.0807682 | No  |
| 2817 | HMDB0029057                       | Threoninyl-Aspartate                                   | C8H14N2O6  | 233.0807682 | No  |
| 2817 | HMDB0029158                       | gamma-Glutamylserine                                   | C8H14N2O6  | 233.0807682 | No  |
| 2817 | HMDB0030486                       | (S)-2,3-Dihydro-6-hydroxy-5-(hydroxyacetyl)-2-isoprop  | C13H14O4   | 233.0807682 | No  |
| 2817 | HMDB0030648                       | Artemidiol                                             | C13H14O4   | 233.0807682 | No  |
| 2817 | HMDB0033109                       | Methyl (2R*,3S*)-2,3-dihydro-3-hydroxy-2-isopropeny    | C13H14O4   | 233.0807682 | No  |
| 2817 | HMDB0035712                       | Aloesol                                                | C13H14O4   | 233.0807682 | No  |



|      |                                  |                                                                 |            |             |    |
|------|----------------------------------|-----------------------------------------------------------------|------------|-------------|----|
| 2817 | HMDB0040906; C17917; CHEBI:81380 | Coixinden B                                                     | C13H14O4   | 233.0807682 | No |
| 2817 | HMDB0041005                      | 1''-Acetoxychavicol acetate                                     | C13H14O4   | 233.0807682 | No |
| 2817 | HMDB0041006; C10426; CHEBI:469   | 1''-Acetoxychavicol                                             | C13H14O4   | 233.0807682 | No |
| 2819 | HMDB0030763                      | (10S,11S)-Pterodin C                                            | C14H18O3   | 233.1183592 | No |
| 2819 | HMDB0036046                      | Dehydrooreadone                                                 | C14H18O3   | 233.1183592 | No |
| 2819 | HMDB0036607                      | (S)-Pterodin P                                                  | C14H18O3   | 233.1183592 | No |
| 2819 | HMDB0038218                      | Pterodin N                                                      | C14H18O3   | 233.1183592 | No |
| 2819 | HMDB0133171                      | (2Z)-3-hydroxy-2-(phenylmethylidene)heptanoic acid              | C14H18O3   | 233.1183592 | No |
| 2819 | HMDB0133172                      | (2Z)-2-[(3-hydroxyphenyl)methylidene]heptanoic acid             | C14H18O3   | 233.1183592 | No |
| 2819 | HMDB0133173                      | (2Z)-2-[(4-hydroxyphenyl)methylidene]heptanoic acid             | C14H18O3   | 233.1183592 | No |
| 2819 | HMDB0133174                      | (2Z)-6-hydroxy-2-(phenylmethylidene)heptanoic acid              | C14H18O3   | 233.1183592 | No |
| 2819 | HMDB0133175                      | 2-pentyl-3-phenyloxirane-2-carboxylic acid                      | C14H18O3   | 233.1183592 | No |
| 2819 | HMDB0133176                      | (2Z)-7-hydroxy-2-(phenylmethylidene)heptanoic acid              | C14H18O3   | 233.1183592 | No |
| 2819 | HMDB0133177                      | (2Z)-2-[(2-hydroxyphenyl)methylidene]heptanoic acid             | C14H18O3   | 233.1183592 | No |
| 2820 | HMDB0033461                      | 4-Coumaroylputrescine                                           | C13H18N2O2 | 233.129497  | No |
| 2820 | HMDB0139874                      | N-(4-aminobutyl)-3-(4-hydroxyphenyl)prop-2-enimide              | C13H18N2O2 | 233.129497  | No |
| 2822 | HMDB0030016; C09743              | Valeric acid                                                    | C15H22O2   | 233.1548196 | No |
| 2822 | HMDB0031349                      | Epiacoronene                                                    | C15H22O2   | 233.1548196 | No |
| 2822 | HMDB0032081                      | 4,10-Longipinanedione                                           | C15H22O2   | 233.1548196 | No |
| 2822 | HMDB0033252                      | Curcumanolide A                                                 | C15H22O2   | 233.1548196 | No |
| 2822 | HMDB0033253; C17492              | Curcumenone                                                     | C15H22O2   | 233.1548196 | No |
| 2822 | HMDB0033960; C16942; CHEBI:80811 | Curcumenol                                                      | C15H22O2   | 233.1548196 | No |
| 2822 | HMDB0034562                      | 9-Pentadecene-12,14-diene-1,11-diol                             | C15H22O2   | 233.1548196 | No |
| 2822 | HMDB0034742                      | Saussurea lactone                                               | C15H22O2   | 233.1548196 | No |
| 2822 | HMDB0034956                      | Oxysolavetivone                                                 | C15H22O2   | 233.1548196 | No |
| 2822 | HMDB0035202                      | 7-Hydroxycostal                                                 | C15H22O2   | 233.1548196 | No |
| 2822 | HMDB0035407; C16949              | Dehydrocurdione                                                 | C15H22O2   | 233.1548196 | No |
| 2822 | HMDB0035408                      | 1,10-Epoxygermacrone                                            | C15H22O2   | 233.1548196 | No |
| 2822 | HMDB0035413                      | (4alpha,5alpha)-11-Eremophilene-2,9-dione                       | C15H22O2   | 233.1548196 | No |
| 2822 | HMDB0035639                      | Petasalbin                                                      | C15H22O2   | 233.1548196 | No |
| 2822 | HMDB0035794                      | beta-Costic acid                                                | C15H22O2   | 233.1548196 | No |
| 2822 | HMDB0035869                      | alpha-Rotunol                                                   | C15H22O2   | 233.1548196 | No |
| 2822 | HMDB0035889; C17489              | Germacrone 4,5-epoxide                                          | C15H22O2   | 233.1548196 | No |
| 2822 | HMDB0035935                      | Dihydroisoolantolactone                                         | C15H22O2   | 233.1548196 | No |
| 2822 | HMDB0036035                      | Marasmene                                                       | C15H22O2   | 233.1548196 | No |
| 2822 | HMDB0036390                      | 3-Phenylpropyl hexanoate                                        | C15H22O2   | 233.1548196 | No |
| 2822 | HMDB0036392                      | (Z)-alpha-Bergamotenoic acid                                    | C15H22O2   | 233.1548196 | No |
| 2822 | HMDB0036427                      | Procurcumenol                                                   | C15H22O2   | 233.1548196 | No |
| 2822 | HMDB0036449                      | (1alpha,4beta,5beta)-4-Hydroxy-7(11),10(14)-guaiaadiene         | C15H22O2   | 233.1548196 | No |
| 2822 | HMDB0036466                      | Zerumbone oxide                                                 | C15H22O2   | 233.1548196 | No |
| 2822 | HMDB0036647                      | Isocurcumenol                                                   | C15H22O2   | 233.1548196 | No |
| 2822 | HMDB0037038                      | Cyclodehydroisobutimin                                          | C15H22O2   | 233.1548196 | No |
| 2822 | HMDB0037391                      | p-Hydroxynonanophenone                                          | C15H22O2   | 233.1548196 | No |
| 2822 | HMDB0037640                      | 2-Methyl-4-phenyl-2-butyl 2-methylpropanoate                    | C15H22O2   | 233.1548196 | No |
| 2822 | HMDB0037710                      | 4-Methylphenyl octanoate                                        | C15H22O2   | 233.1548196 | No |
| 2822 | HMDB0037739                      | 7-(1,3-Cyclohexadienyl)-5-hydroxy-2,6-dimethyl-2-heptenoic acid | C15H22O2   | 233.1548196 | No |
| 2822 | HMDB0038190                      | Rishitinol                                                      | C15H22O2   | 233.1548196 | No |
| 2822 | HMDB0038198                      | 3,7-Bisaboladiene-2,8-dione                                     | C15H22O2   | 233.1548196 | No |
| 2822 | HMDB0038698                      | xi-2-Hydroxy-1,3,5-bisabolatrien-9-one                          | C15H22O2   | 233.1548196 | No |
| 2822 | HMDB0038795                      | 7,9-Illudadiene-3,14-diol                                       | C15H22O2   | 233.1548196 | No |
| 2822 | HMDB0038796                      | 2,7(14)-Illudadiene-10,15-diol                                  | C15H22O2   | 233.1548196 | No |
| 2822 | HMDB0038914                      | 4,6-Decadien-1-ol isovalerate                                   | C15H22O2   | 233.1548196 | No |
| 2822 | HMDB0039621                      | beta-Santalal acid                                              | C15H22O2   | 233.1548196 | No |
| 2822 | HMDB0041036; C17504              | Sugeonol                                                        | C15H22O2   | 233.1548196 | No |
| 2822 | HMDB0134131                      | 2-[hydroxy(phenyl)methyl]octanal                                | C15H22O2   | 233.1548196 | No |
| 2822 | HMDB0134132                      | 2-[(3-hydroxyphenyl)methyl]octanal                              | C15H22O2   | 233.1548196 | No |
| 2822 | HMDB0134133                      | 2-[(4-hydroxyphenyl)methyl]octanal                              | C15H22O2   | 233.1548196 | No |
| 2822 | HMDB0134134                      | 2-benzyl-7-hydroxyoctanal                                       | C15H22O2   | 233.1548196 | No |
| 2822 | HMDB0134135                      | 2-benzyl-8-hydroxyoctanal                                       | C15H22O2   | 233.1548196 | No |
| 2822 | HMDB0134136                      | 2-benzyl-2-hydroxyoctanal                                       | C15H22O2   | 233.1548196 | No |
| 2822 | HMDB0134137                      | 2-[(2-hydroxyphenyl)methyl]octanal                              | C15H22O2   | 233.1548196 | No |

|      |                                  |                                                            |            |             |     |
|------|----------------------------------|------------------------------------------------------------|------------|-------------|-----|
| 2822 | HMDB0134138                      | 2-(phenylmethylidene)octane-1,3-diol                       | C15H22O2   | 233.1548196 | No  |
| 2822 | HMDB0134139                      | 3-[(1Z)-2-hexyl-3-hydroxyprop-1-en-1-yl]phenol             | C15H22O2   | 233.1548196 | No  |
| 2822 | HMDB0134140                      | 4-[(1Z)-2-hexyl-3-hydroxyprop-1-en-1-yl]phenol             | C15H22O2   | 233.1548196 | No  |
| 2822 | HMDB0134141                      | (2Z)-2-(phenylmethylidene)octane-1,7-diol                  | C15H22O2   | 233.1548196 | No  |
| 2822 | HMDB0134142                      | (2-hexyl-3-phenyloxiran-2-yl)methanol                      | C15H22O2   | 233.1548196 | No  |
| 2822 | HMDB0134143                      | (2Z)-2-(phenylmethylidene)octane-1,8-diol                  | C15H22O2   | 233.1548196 | No  |
| 2822 | HMDB0134153                      | 2-benzyl-octanoic acid                                     | C15H22O2   | 233.1548196 | No  |
| 2839 | HMDB0013204                      | 6-Succinoaminopurine                                       | C9H9N5O3   | 234.063768  | No  |
| 2845 | HMDB0060851                      | N,O-Didesmethyltramadol                                    | C14H21NO2  | 234.1497497 | No  |
| 2863 | HMDB0028750                      | Aspartyl-Cysteine                                          | C7H12N2O5S | 235.039875  | Yes |
| 2863 | HMDB0028771                      | Cysteinyl-Aspartate                                        | C7H12N2O5S | 235.039875  | Yes |
| 2865 | HMDB0001200; C02406; CHEBI:18377 | N"-Formylkynurenine                                        | C11H12N2O4 | 235.0726739 | No  |
| 2865 | HMDB0060485; C02700; CHEBI:30249 | L-Formylkynurenine                                         | C11H12N2O4 | 235.0726739 | No  |
| 2866 | HMDB0037683                      | Ethyl vanillin isobutyrate                                 | C13H16O4   | 235.0980711 | Yes |
| 2866 | HMDB0060564; CHEBI:133199        | Carboxy-ibuprofen                                          | C13H16O4   | 235.0980711 | Yes |
| 2866 | HMDB0124833                      | 4-hydroxy-2-methoxy-3-(3-methylbut-2-en-1-yl)benzoic acid  | C13H16O4   | 235.0980711 | Yes |
| 2866 | HMDB0135908                      | 2-hydroxy-2-[4-hydroxy-3-(3-methylbut-2-en-1-yl)]phenol    | C13H16O4   | 235.0980711 | Yes |
| 2866 | HMDB0140425                      | 4-hydroxy-3-methoxy-5-(3-methylbut-2-en-1-yl)benzoic acid  | C13H16O4   | 235.0980711 | Yes |
| 2868 | HMDB0034462; C14718; CHEBI:17879 | Heptyl 4-hydroxybenzoate                                   | C14H20O3   | 235.1332752 | No  |
| 2868 | HMDB0040778                      | Eremopetasidione                                           | C14H20O3   | 235.1332752 | No  |
| 2869 | HMDB0014859; C07375; CHEBI:8430  | Procaine                                                   | C13H20N2O2 | 235.1450745 | Yes |
| 2869 | HMDB0139525                      | N-(4-aminobutyl)-3-(4-hydroxyphenyl)propanimidic acid      | C13H20N2O2 | 235.1450745 | Yes |
| 2870 | HMDB0036468                      | 1,5,5,8-Tetramethyl-12-thiabicyclo[9.1.0]dodeca-3,7-diene  | C15H24S    | 235.1530502 | No  |
| 2870 | HMDB0036469                      | 3,7,7,10-Tetramethyl-12-thiabicyclo[9.1.0]dodeca-3,7-diene | C15H24S    | 235.1530502 | No  |
| 2870 | HMDB0038151                      | Mintsulfide                                                | C15H24S    | 235.1530502 | No  |
| 2871 | HMDB0002352; C09627; CHEBI:28283 | Capsidiol                                                  | C15H24O2   | 235.1702352 | No  |
| 2871 | HMDB0030891                      | (2E,6E)-1-Hydroxy-2,6,10-farnesatrien-9-one                | C15H24O2   | 235.1702352 | No  |
| 2871 | HMDB0030916                      | 2-Hydroxyacorenone                                         | C15H24O2   | 235.1702352 | No  |
| 2871 | HMDB0030920                      | Acorusnol                                                  | C15H24O2   | 235.1702352 | No  |
| 2871 | HMDB0031348                      | Epiacorene                                                 | C15H24O2   | 235.1702352 | No  |
| 2871 | HMDB0032048                      | 2,6-Di-tert-butyl-4-hydroxymethylphenol                    | C15H24O2   | 235.1702352 | No  |
| 2871 | HMDB0032292; CHEBI:545749        | Geranyl tiglate                                            | C15H24O2   | 235.1702352 | No  |
| 2871 | HMDB0032681                      | 10alpha-4,5-Seco-11-eudesmene-4,5-dione                    | C15H24O2   | 235.1702352 | No  |
| 2871 | HMDB0033083                      | (4S)-Dihydrocurcumenone                                    | C15H24O2   | 235.1702352 | No  |
| 2871 | HMDB0033104                      | Calamensesquiterpinenol                                    | C15H24O2   | 235.1702352 | No  |
| 2871 | HMDB0034714; C17493              | Curdione                                                   | C15H24O2   | 235.1702352 | No  |
| 2871 | HMDB0034722                      | 3-Hydroxy-1,10-bisaboladien-9-one                          | C15H24O2   | 235.1702352 | No  |
| 2871 | HMDB0035032                      | Epilubimin                                                 | C15H24O2   | 235.1702352 | No  |
| 2871 | HMDB0035040                      | 7-Hydroxycostol                                            | C15H24O2   | 235.1702352 | No  |
| 2871 | HMDB0035127                      | (-)-Myrtenyl isovalerate                                   | C15H24O2   | 235.1702352 | No  |
| 2871 | HMDB0035147                      | Rishitinone                                                | C15H24O2   | 235.1702352 | No  |
| 2871 | HMDB0035301                      | 4alpha,5alpha-Epoxy-11-eudesmen-3a-ol                      | C15H24O2   | 235.1702352 | No  |
| 2871 | HMDB0035648                      | Isolubimin                                                 | C15H24O2   | 235.1702352 | No  |
| 2871 | HMDB0035827                      | Aubergenone                                                | C15H24O2   | 235.1702352 | No  |
| 2871 | HMDB0036446                      | beta-Kessyl ketone                                         | C15H24O2   | 235.1702352 | No  |
| 2871 | HMDB0036549                      | Apotrichothecene                                           | C15H24O2   | 235.1702352 | No  |
| 2871 | HMDB0036668                      | Humulene-8-hydroperoxide                                   | C15H24O2   | 235.1702352 | No  |
| 2871 | HMDB0036680; C16946              | Cyperolone                                                 | C15H24O2   | 235.1702352 | No  |
| 2871 | HMDB0036687                      | Tanavulgarol                                               | C15H24O2   | 235.1702352 | No  |
| 2871 | HMDB0037393                      | (3xi,7(11)Z)-7(11)-Copaene-4,12-diol                       | C15H24O2   | 235.1702352 | No  |
| 2871 | HMDB0037906                      | Hernandulcin                                               | C15H24O2   | 235.1702352 | No  |
| 2871 | HMDB0038027                      | beta-Ionyl acetate                                         | C15H24O2   | 235.1702352 | No  |
| 2871 | HMDB0038122                      | Curcumol                                                   | C15H24O2   | 235.1702352 | No  |
| 2871 | HMDB0038144                      | Petasitolone                                               | C15H24O2   | 235.1702352 | No  |
| 2871 | HMDB0038178                      | Davanone                                                   | C15H24O2   | 235.1702352 | No  |
| 2871 | HMDB0039525                      | Dihydro-alpha-santalal acid                                | C15H24O2   | 235.1702352 | No  |
| 2871 | HMDB0039688                      | Tuberone                                                   | C15H24O2   | 235.1702352 | No  |
| 2871 | HMDB0040712                      | Humulene diepoxide A                                       | C15H24O2   | 235.1702352 | No  |
| 2887 | HMDB0034251                      | N-Benzoylaspartic acid                                     | C11H11NO5  | 236.0590286 | Yes |
| 2887 | HMDB0038942                      | Methyl 2,3-dihydro-3,5-dihydroxy-2-oxo-3-indoleacetic acid | C11H11NO5  | 236.0590286 | Yes |
| 2890 | HMDB0013067                      | Salsoline-1-carboxylate                                    | C12H15NO4  | 236.0922087 | Yes |

|      |                                 |                                                      |            |             |     |
|------|---------------------------------|------------------------------------------------------|------------|-------------|-----|
| 2890 | HMDB0032775                     | 3-Hydroxy-carbofuran                                 | C12H15NO4  | 236.0922087 | Yes |
| 2890 | HMDB0062175                     | N-lactoyl-Phenylalanine                              | C12H15NO4  | 236.0922087 | Yes |
| 2890 | HMDB0139939                     | 3-(3,4-dihydroxyphenyl)-N-(3-oxopropyl)propanimidic  | C12H15NO4  | 236.0922087 | Yes |
| 2918 | HMDB0014836; CHEBI:1039679      | Nitrofurantoin                                       | C8H6N4O5   | 237.0266663 | No  |
| 2920 | HMDB0033073                     | 1-Propenyl 1-(propylsulfanyl)propyl disulfide        | C9H18OS3   | 237.0424096 | No  |
| 2920 | HMDB0033074                     | 1-(1-Propenylsulfanyl)propyl propyl disulfide        | C9H18OS3   | 237.0424096 | No  |
| 2920 | HMDB0036370                     | 1-(2-Propenylsulfanyl)propyl propyl disulfide        | C9H18OS3   | 237.0424096 | No  |
| 2920 | HMDB0036375                     | 2-Propenyl 1-(propylsulfanyl)propyl disulfide        | C9H18OS3   | 237.0424096 | No  |
| 2920 | HMDB0039494                     | Benzoylmalic acid                                    | C11H10O6   | 237.0424096 | No  |
| 2920 | HMDB0128679                     | 3-(6-hydroxy-7-methoxy-2H-1,3-benzodioxol-5-yl)prop  | C11H10O6   | 237.0424096 | No  |
| 2920 | HMDB0128680                     | 3-(7-hydroxy-6-methoxy-2H-1,3-benzodioxol-5-yl)prop  | C11H10O6   | 237.0424096 | No  |
| 2922 | HMDB0002399                     | Cystathionine sulfoxide                              | C7H14N2O5S | 237.053762  | No  |
| 2922 | HMDB0031816; C01495; CHEBI:5078 | 3-Hydroxyflavone                                     | C15H10O3   | 237.053762  | No  |
| 2922 | HMDB0130492                     | 7-hydroxy-3-phenyl-4H-chromen-4-one                  | C15H10O3   | 237.053762  | No  |
| 2922 | HMDB0137519                     | 6-hydroxy-2-(phenylmethylidene)-2,3-dihydro-1-benzc  | C15H10O3   | 237.053762  | No  |
| 2922 | HMDB0141529                     | 2-(2-hydroxyphenyl)-4H-chromen-4-one                 | C15H10O3   | 237.053762  | No  |
| 2922 | HMDB0141530                     | 6-hydroxy-2-phenyl-4H-chromen-4-one                  | C15H10O3   | 237.053762  | No  |
| 2922 | HMDB0141531                     | 7-hydroxy-2-phenyl-4H-chromen-4-one                  | C15H10O3   | 237.053762  | No  |
| 2922 | HMDB0141532                     | 2-(3-hydroxyphenyl)-4H-chromen-4-one                 | C15H10O3   | 237.053762  | No  |
| 2922 | HMDB0141533                     | 2-(4-hydroxyphenyl)-4H-chromen-4-one                 | C15H10O3   | 237.053762  | No  |
| 2922 | HMDB0141534                     | 5-hydroxy-2-phenyl-4H-chromen-4-one                  | C15H10O3   | 237.053762  | No  |
| 2923 | HMDB0131294                     | 3,4,5-trihydroxy-6-(2-hydroxyethoxy)oxane-2-carboxyl | C8H14O8    | 237.061862  | No  |
| 2924 | HMDB0002511                     | 3,4,5-Trimethoxycinnamic acid                        | C12H14O5   | 237.0768782 | Yes |
| 2924 | HMDB0011721                     | Trans-2, 3, 4-Trimethoxycinnamate                    | C12H14O5   | 237.0768782 | Yes |
| 2924 | HMDB0031771                     | 1-(2,4,5-Trimethoxyphenyl)-1,2-propanedione          | C12H14O5   | 237.0768782 | Yes |
| 2924 | HMDB0124869                     | 3-(3,4,5-trimethoxyphenyl)prop-2-enoic acid          | C12H14O5   | 237.0768782 | Yes |
| 2924 | HMDB0128658                     | 3-(6,7-dimethoxy-2H-1,3-benzodioxol-5-yl)propanal    | C12H14O5   | 237.0768782 | Yes |
| 2924 | HMDB0128659                     | 3-(6,7-dimethoxy-2H-1,3-benzodioxol-5-yl)prop-2-en-1 | C12H14O5   | 237.0768782 | Yes |
| 2924 | HMDB0128697                     | 3-(4-hydroxy-2,3,5-trimethoxyphenyl)prop-2-enal      | C12H14O5   | 237.0768782 | Yes |
| 2925 | HMDB0015084; C07501; CHEBI:4995 | Felbamate                                            | C11H14N2O4 | 237.0861021 | No  |
| 2925 | HMDB0028853                     | Glycyl-Tyrosine                                      | C11H14N2O4 | 237.0861021 | No  |
| 2925 | HMDB0029105                     | Tyrosyl-Glycine                                      | C11H14N2O4 | 237.0861021 | No  |
| 2925 | HMDB0029451                     | gamma-Glutaminyl-4-hydroxybenzene                    | C11H14N2O4 | 237.0861021 | No  |
| 2925 | HMDB0040988                     | Falimint                                             | C11H14N2O4 | 237.0861021 | No  |
| 2926 | HMDB0029700; CHEBI:724725       | Cinnamyl benzoate                                    | C16H14O2   | 237.0920021 | No  |
| 2926 | HMDB0032585                     | 4''-Methoxychalcone                                  | C16H14O2   | 237.0920021 | No  |
| 2926 | HMDB0040286                     | Benzyl cinnamate                                     | C16H14O2   | 237.0920021 | No  |
| 2926 | HMDB0062295; CHEBI:42334        | 15(R)-hydroperoxy-EPE                                | C8H18N2O4S | 237.0920021 | No  |
| 2927 | HMDB0033065                     | (x)-1,2-Propanediol 1-O-b-D-glucopyranoside          | C9H18O7    | 237.0980006 | No  |
| 2929 | HMDB0014562; CHEBI:9073         | Secobarbital                                         | C12H18N2O3 | 237.124898  | No  |
| 2929 | HMDB0139940                     | N-(3-aminopropyl)-3-(3,4-dihydroxyphenyl)propanimic  | C12H18N2O3 | 237.124898  | No  |
| 2931 | HMDB0038256                     | Geranyl acetoacetate                                 | C14H22O3   | 237.1492653 | No  |
| 2931 | HMDB0112083                     | 3,4-Dimethyl-5-pentyl-2-furanpropanoic acid          | C14H22O3   | 237.1492653 | No  |
| 2932 | HMDB0029350                     | Geranyl 3-methylbutanoate                            | C15H26O2   | 237.1860885 | No  |
| 2932 | HMDB0030428                     | Linalyl isovalerate                                  | C15H26O2   | 237.1860885 | No  |
| 2932 | HMDB0031383                     | (3S,4S,6R,7S)-1,10-Bisaboladiene-3,4-diol            | C15H26O2   | 237.1860885 | No  |
| 2932 | HMDB0031384                     | beta-Kessyl alcohol                                  | C15H26O2   | 237.1860885 | No  |
| 2932 | HMDB0032054                     | alpha-Terpinyol pentanoate                           | C15H26O2   | 237.1860885 | No  |
| 2932 | HMDB0032209                     | Citronellyl trans-2-methyl-2-butenate                | C15H26O2   | 237.1860885 | No  |
| 2932 | HMDB0032291                     | Geranyl 2-methylbutyrate                             | C15H26O2   | 237.1860885 | No  |
| 2932 | HMDB0032343                     | Isobornyl 2-methylbutyrate                           | C15H26O2   | 237.1860885 | No  |
| 2932 | HMDB0033228                     | Guaidiol                                             | C15H26O2   | 237.1860885 | No  |
| 2932 | HMDB0034673                     | Calamendiol                                          | C15H26O2   | 237.1860885 | No  |
| 2932 | HMDB0035287; C09652             | Daucol                                               | C15H26O2   | 237.1860885 | No  |
| 2932 | HMDB0035887                     | Germacrenone                                         | C15H26O2   | 237.1860885 | No  |
| 2932 | HMDB0036032                     | 3beta-7-Drime-3,11-diol                              | C15H26O2   | 237.1860885 | No  |
| 2932 | HMDB0036730                     | Tricyclohumuladiol                                   | C15H26O2   | 237.1860885 | No  |
| 2932 | HMDB0036880                     | 1,6,9-Farnesatriene-3,11-diol                        | C15H26O2   | 237.1860885 | No  |
| 2932 | HMDB0037195                     | 2-Propenyl cyclohexanehexanoate                      | C15H26O2   | 237.1860885 | No  |
| 2932 | HMDB0037279                     | 2,10-Bisaboladiene-1,4-diol                          | C15H26O2   | 237.1860885 | No  |
| 2932 | HMDB0037284                     | 5(1->10)-Abeo-1,12-patchoulanediol                   | C15H26O2   | 237.1860885 | No  |

|      |                                      |                                                       |            |             |     |
|------|--------------------------------------|-------------------------------------------------------|------------|-------------|-----|
| 2932 | HMDB0038136                          | Curcumadiol                                           | C15H26O2   | 237.1860885 | No  |
| 2932 | HMDB0038138                          | alpha-Bisabolol oxide C                               | C15H26O2   | 237.1860885 | No  |
| 2932 | HMDB0038196; C16773                  | alpha-Bisabolol oxide A                               | C15H26O2   | 237.1860885 | No  |
| 2932 | HMDB0038197; C16774; CHEBI:80720     | alpha-Bisabolol oxide B                               | C15H26O2   | 237.1860885 | No  |
| 2932 | HMDB0038247                          | Bornyl valerate                                       | C15H26O2   | 237.1860885 | No  |
| 2932 | HMDB0038248                          | Bornyl isovalerate                                    | C15H26O2   | 237.1860885 | No  |
| 2932 | HMDB0038250                          | Isobornyl isovalerate                                 | C15H26O2   | 237.1860885 | No  |
| 2932 | HMDB0039130                          | Methyl (Z,Z)-5,8-tetradecadienoate                    | C15H26O2   | 237.1860885 | No  |
| 2932 | HMDB0039745                          | (2E,6E,9xi)-Farnesol                                  | C15H26O2   | 237.1860885 | No  |
| 2932 | HMDB0040273                          | Terpenyl isovalerate                                  | C15H26O2   | 237.1860885 | No  |
| 2932 | HMDB0040281                          | Geranyl valerate                                      | C15H26O2   | 237.1860885 | No  |
| 2932 | HMDB0041589                          | alpha-Kessyl alcohol                                  | C15H26O2   | 237.1860885 | No  |
| 2933 | HMDB0034181                          | 3-Methylcyclopentadecanone                            | C16H30O    | 237.2228095 | No  |
| 2933 | HMDB0037544                          | (±)-2-Dodecylcyclobutanone                            | C16H30O    | 237.2228095 | No  |
| 2933 | HMDB0060482; CHEBI:17585             | Hexadecenal                                           | C16H30O    | 237.2228095 | No  |
| 2952 | HMDB0060805                          | 9-Carboxymethoxymethylguanidine                       | C8H9N5O4   | 238.058373  | No  |
| 2956 | HMDB0033525                          | 2,4-Undecadiene-8,10-diynoic acid 2,3-dehydropiperid  | C16H17NO   | 238.1244227 | No  |
| 2958 | HMDB0001937; C11770; CHEBI:8746      | Salbutamol                                            | C13H21NO3  | 238.144864  | No  |
| 2958 | HMDB0014366; C07053; CHEBI:775164    | Isoetharine                                           | C13H21NO3  | 238.144864  | No  |
| 2958 | HMDB0030516                          | Petasinine                                            | C13H21NO3  | 238.144864  | No  |
| 2958 | HMDB0033454                          | 3alpha-Tigloyloxytropane N-oxide                      | C13H21NO3  | 238.144864  | No  |
| 2958 | HMDB0041935                          | Moprolol                                              | C13H21NO3  | 238.144864  | No  |
| 2977 | HMDB0128682                          | 3-(6-hydroxy-7-methoxy-2H-1,3-benzodioxol-5-yl)prop   | C11H12O6   | 239.0563309 | No  |
| 2977 | HMDB0128684                          | 3-(7-hydroxy-6-methoxy-2H-1,3-benzodioxol-5-yl)prop   | C11H12O6   | 239.0563309 | No  |
| 2977 | HMDB0132101                          | 2-benzyl-2,3-dihydroxybutanedioic acid                | C11H12O6   | 239.0563309 | No  |
| 2977 | HMDB0135751                          | 3-(2,4-dihydroxy-3,5-dimethoxyphenyl)prop-2-enoic ac  | C11H12O6   | 239.0563309 | No  |
| 2977 | HMDB0135752                          | 3-(4-hydroxy-3,5-dimethoxyphenyl)oxirane-2-carboxylic | C11H12O6   | 239.0563309 | No  |
| 2978 | HMDB0030254; CHEBI:583580            | 3-(3,4,5-Trimethoxyphenyl)propanoic acid              | C12H16O5   | 239.093021  | Yes |
| 2978 | HMDB0038627                          | Ethyl 3,4,5-trimethoxybenzoate                        | C12H16O5   | 239.093021  | Yes |
| 2978 | HMDB0041756                          | Isopropyl 3-(3,4-dihydroxyphenyl)-2-hydroxypropanoic  | C12H16O5   | 239.093021  | Yes |
| 2978 | HMDB0061112; HMDB0062776; CHEBI:4125 | 3-Carboxy-4-methyl-5-propyl-2-furanpropionic acid     | C12H16O5   | 239.093021  | Yes |
| 2978 | HMDB0125802                          | 7-methoxy-2,2-dimethyl-3,4-dihydro-2H-1-benzopyran    | C12H16O5   | 239.093021  | Yes |
| 2978 | HMDB0125804                          | 2-(hydroxymethyl)-7-methoxy-2-methyl-3,4-dihydro-2H-1 | C12H16O5   | 239.093021  | Yes |
| 2978 | HMDB0127748                          | 4-hydroxy-5-(4-hydroxy-3-methoxyphenyl)pentanoic acid | C12H16O5   | 239.093021  | Yes |
| 2978 | HMDB0127826                          | 4-hydroxy-5-(3-hydroxy-4-methoxyphenyl)pentanoic acid | C12H16O5   | 239.093021  | Yes |
| 2978 | HMDB0128672                          | 3-(6,7-dimethoxy-2H-1,3-benzodioxol-5-yl)propan-1-ol  | C12H16O5   | 239.093021  | Yes |
| 2978 | HMDB0128705                          | 3-(4-hydroxy-2,3,5-trimethoxyphenyl)propanal          | C12H16O5   | 239.093021  | Yes |
| 2978 | HMDB0128721                          | 4-(3-hydroxyprop-1-en-1-yl)-2,3,6-trimethoxyphenol    | C12H16O5   | 239.093021  | Yes |
| 2978 | HMDB0142074                          | 3-(2,3,4-trimethoxyphenyl)propanoic acid              | C12H16O5   | 239.093021  | Yes |
| 2979 | HMDB0000194; C01262; CHEBI:18323     | Anserine                                              | C10H16N4O3 | 239.115147  | Yes |
| 2979 | HMDB0000745; C00884; CHEBI:491179    | Homocarnosine                                         | C10H16N4O3 | 239.115147  | Yes |
| 2979 | HMDB0005769                          | Balenine                                              | C10H16N4O3 | 239.115147  | Yes |
| 2983 | HMDB0032369                          | L-Menthyl acetoacetate                                | C14H24O3   | 239.1660436 | Yes |
| 2985 | HMDB0029765                          | 9-Pentadecenoic acid                                  | C15H28O2   | 239.2018971 | No  |
| 2985 | HMDB0032347; CHEBI:46643             | Isobutyl 10-undecenoate                               | C15H28O2   | 239.2018971 | No  |
| 2985 | HMDB0034455                          | Exaltolide                                            | C15H28O2   | 239.2018971 | No  |
| 2985 | HMDB0036426                          | Butyl undecylenate                                    | C15H28O2   | 239.2018971 | No  |
| 2985 | HMDB0037190                          | Rhodinyl isovalerate                                  | C15H28O2   | 239.2018971 | No  |
| 2985 | HMDB0037211                          | Menthyl isovalerate                                   | C15H28O2   | 239.2018971 | No  |
| 2985 | HMDB0037229                          | Citronellyl pentanoate                                | C15H28O2   | 239.2018971 | No  |
| 2985 | HMDB0038954                          | Citronellyl isovalerate                               | C15H28O2   | 239.2018971 | No  |
| 2985 | HMDB0039715                          | Auberganol                                            | C15H28O2   | 239.2018971 | No  |
| 2985 | HMDB0040997                          | 15,5-Farnesanolide                                    | C15H28O2   | 239.2018971 | No  |
| 2987 | HMDB0001551; C00517; CHEBI:17600     | Palmitaldehyde                                        | C16H32O    | 239.2377895 | No  |
| 2987 | HMDB0031052                          | 2-Hexadecanone                                        | C16H32O    | 239.2377895 | No  |
| 2998 | HMDB0060002; CHEBI:89621             | Indole-3-carboxylic acid-O-sulphate                   | C9H7NO5S   | 239.9975208 | Yes |
| 3001 | HMDB0033527                          | Dehydroisochalciporone                                | C16H19NO   | 240.1396306 | No  |
| 3001 | HMDB0060535                          | N-Desmethyldiphenhydramine                            | C16H19NO   | 240.1396306 | No  |
| 3001 | HMDB0061165                          | N,N-Didemethyl orphenadrine                           | C16H19NO   | 240.1396306 | No  |
| 3002 | HMDB0038588                          | Dioscoretine                                          | C13H23NO3  | 240.1587557 | No  |
| 3018 | HMDB0029953                          | D-erythro-D-galacto-octitol                           | C8H18O8    | 241.0907529 | No  |

|      |                                  |                                                                     |            |             |     |
|------|----------------------------------|---------------------------------------------------------------------|------------|-------------|-----|
| 3022 | HMDB0010730; CHEBI:37270         | 3-Oxotetradecanoic acid                                             | C14H26O3   | 241.1819031 | No  |
| 3022 | HMDB0030982                      | 6-Ketomyristic acid                                                 | C14H26O3   | 241.1819031 | No  |
| 3022 | HMDB0032370                      | L-Menthyl (R,S)-3-hydroxybutyrate                                   | C14H26O3   | 241.1819031 | No  |
| 3024 | HMDB0000826; C16537              | Pentadecanoic acid                                                  | C15H30O2   | 241.2174439 | No  |
| 3024 | HMDB0030469; CHEBI:447965        | Methyl tetradecanoate                                               | C15H30O2   | 241.2174439 | No  |
| 3024 | HMDB0032250                      | Dodecyl propionate                                                  | C15H30O2   | 241.2174439 | No  |
| 3024 | HMDB0032328; CHEBI:32361         | Hexyl nonanoate                                                     | C15H30O2   | 241.2174439 | No  |
| 3024 | HMDB0036218                      | Heptyl octanoate                                                    | C15H30O2   | 241.2174439 | No  |
| 3024 | HMDB0036220                      | Octyl heptanoate                                                    | C15H30O2   | 241.2174439 | No  |
| 3024 | HMDB0037306                      | Pentyl decanoate                                                    | C15H30O2   | 241.2174439 | No  |
| 3024 | HMDB0038907                      | 3-Methylbutyl decanoate                                             | C15H30O2   | 241.2174439 | No  |
| 3024 | HMDB0040998                      | 7(14)-Farnesene-9,12-diol                                           | C15H30O2   | 241.2174439 | No  |
| 3024 | HMDB0041588                      | 2,6,10-Trimethylidodecanoic acid                                    | C15H30O2   | 241.2174439 | No  |
| 3024 | HMDB0059820                      | Isopropyl_laurate                                                   | C15H30O2   | 241.2174439 | No  |
| 3024 | HMDB0059833                      | Ethyl tridecanoate                                                  | C15H30O2   | 241.2174439 | No  |
| 3024 | HMDB0061707; CHEBI:39250         | 13-Methylmyristic acid                                              | C15H30O2   | 241.2174439 | No  |
| 3044 | HMDB0000089; C00475; CHEBI:17562 | Cytidine                                                            | C9H13N3O5  | 242.0800096 | Yes |
| 3044 | HMDB0015122; C02961; CHEBI:28680 | Cytarabine                                                          | C9H13N3O5  | 242.0800096 | Yes |
| 3044 | HMDB0060478; C05711; CHEBI:10565 | gamma-Glutamyl-beta-cyanoalanine                                    | C9H13N3O5  | 242.0800096 | Yes |
| 3047 | HMDB0028805                      | Glutaminyproline                                                    | C10H17N3O4 | 242.1136293 | Yes |
| 3047 | HMDB0029015                      | Prolyl-Glutamine                                                    | C10H17N3O4 | 242.1136293 | Yes |
| 3047 | HMDB0029031                      | Prolyl-Gamma-glutamate                                              | C10H17N3O4 | 242.1136293 | Yes |
| 3049 | HMDB0015133; CHEBI:350328        | Frovatriptan                                                        | C14H17N3O  | 242.1301394 | Yes |
| 3050 | HMDB0028959                      | Lysyl-Proline                                                       | C11H21N3O3 | 242.1489394 | No  |
| 3050 | HMDB0029022                      | Prolyl-Lysine                                                       | C11H21N3O3 | 242.1489394 | No  |
| 3051 | HMDB0033526                      | Chalciporone                                                        | C16H21NO   | 242.1549883 | No  |
| 3052 | HMDB0013286; CHEBI:74438         | N-Undecanoylglycine                                                 | C13H25NO3  | 242.176781  | No  |
| 3072 | HMDB0124975                      | (2E)-3-[3-(sulfooxy)phenyl]prop-2-enoic acid                        | C9H8O6S    | 242.9970342 | Yes |
| 3072 | HMDB0125166                      | (2E)-3-[4-(sulfooxy)phenyl]prop-2-enoic acid                        | C9H8O6S    | 242.9970342 | Yes |
| 3072 | HMDB0127985                      | 3-[3-(sulfooxy)phenyl]prop-2-enoic acid                             | C9H8O6S    | 242.9970342 | Yes |
| 3072 | HMDB0128093                      | 3-[4-(sulfooxy)phenyl]prop-2-enoic acid                             | C9H8O6S    | 242.9970342 | Yes |
| 3072 | HMDB0134054                      | [2-hydroxy-3-(3-oxoprop-1-en-1-yl)phenyl]oxidanesulfonic acid       | C9H8O6S    | 242.9970342 | Yes |
| 3076 | HMDB0059983; CHEBI:88699         | 4-phenylbutanic acid-O-sulphate                                     | C10H12O5S  | 243.0331643 | No  |
| 3076 | HMDB0133637                      | (2-benzyl-3-oxopropoxy)sulfonic acid                                | C10H12O5S  | 243.0331643 | No  |
| 3076 | HMDB0133640                      | (2-methyl-3-oxo-1-phenylpropoxy)sulfonic acid                       | C10H12O5S  | 243.0331643 | No  |
| 3076 | HMDB0133642                      | [3-(2-methyl-3-oxopropyl)phenyl]oxidanesulfonic acid                | C10H12O5S  | 243.0331643 | No  |
| 3076 | HMDB0133644                      | [4-(2-methyl-3-oxopropyl)phenyl]oxidanesulfonic acid                | C10H12O5S  | 243.0331643 | No  |
| 3076 | HMDB0133646                      | [(2E)-3-hydroxy-2-(phenylmethylidene)propoxy]sulfonic acid          | C10H12O5S  | 243.0331643 | No  |
| 3076 | HMDB0133648                      | {3-[(1E)-3-hydroxy-2-methylprop-1-en-1-yl]phenyl}oxidesulfonic acid | C10H12O5S  | 243.0331643 | No  |
| 3076 | HMDB0133649                      | {[(2E)-3-(3-hydroxyphenyl)-2-methylprop-2-en-1-yl]oxy}sulfonic acid | C10H12O5S  | 243.0331643 | No  |
| 3076 | HMDB0133651                      | {4-[(1E)-3-hydroxy-2-methylprop-1-en-1-yl]phenyl}oxidesulfonic acid | C10H12O5S  | 243.0331643 | No  |
| 3076 | HMDB0133652                      | {[(2E)-3-(4-hydroxyphenyl)-2-methylprop-2-en-1-yl]oxy}sulfonic acid | C10H12O5S  | 243.0331643 | No  |
| 3076 | HMDB0133656                      | [(2-methyl-3-phenyloxiran-2-yl)methoxy]sulfonic acid                | C10H12O5S  | 243.0331643 | No  |
| 3076 | HMDB0133658                      | {[(2E)-3-(2-hydroxyphenyl)-2-methylprop-2-en-1-yl]oxy}sulfonic acid | C10H12O5S  | 243.0331643 | No  |
| 3076 | HMDB0133734                      | {[(3E)-2-hydroxy-4-phenylbut-3-en-1-yl]oxy}sulfonic acid            | C10H12O5S  | 243.0331643 | No  |
| 3076 | HMDB0133735                      | {[(3E)-1-hydroxy-4-phenylbut-3-en-2-yl]oxy}sulfonic acid            | C10H12O5S  | 243.0331643 | No  |
| 3076 | HMDB0133737                      | {3-[(1E)-3-hydroxybut-1-en-1-yl]phenyl}oxidanesulfonic acid         | C10H12O5S  | 243.0331643 | No  |
| 3076 | HMDB0133738                      | {[(3E)-4-(3-hydroxyphenyl)but-3-en-2-yl]oxy}sulfonic acid           | C10H12O5S  | 243.0331643 | No  |
| 3076 | HMDB0133740                      | {4-[(1E)-3-hydroxybut-1-en-1-yl]phenyl}oxidanesulfonic acid         | C10H12O5S  | 243.0331643 | No  |
| 3076 | HMDB0133741                      | {[(3E)-4-(4-hydroxyphenyl)but-3-en-2-yl]oxy}sulfonic acid           | C10H12O5S  | 243.0331643 | No  |
| 3076 | HMDB0133745                      | [1-(3-phenyloxiran-2-yl)ethoxy]sulfonic acid                        | C10H12O5S  | 243.0331643 | No  |
| 3076 | HMDB0133766                      | [(3-oxo-1-phenylbutan-2-yl)oxy]sulfonic acid                        | C10H12O5S  | 243.0331643 | No  |
| 3076 | HMDB0133768                      | (2-oxo-4-phenylbutoxy)sulfonic acid                                 | C10H12O5S  | 243.0331643 | No  |
| 3076 | HMDB0133770                      | (3-oxo-1-phenylbutoxy)sulfonic acid                                 | C10H12O5S  | 243.0331643 | No  |
| 3076 | HMDB0133772                      | [3-(3-oxobutyl)phenyl]oxidanesulfonic acid                          | C10H12O5S  | 243.0331643 | No  |
| 3076 | HMDB0133774                      | [4-(3-oxobutyl)phenyl]oxidanesulfonic acid                          | C10H12O5S  | 243.0331643 | No  |
| 3076 | HMDB0135245                      | [2-methoxy-4-(prop-2-en-1-yl)phenyl]oxidanesulfonic acid            | C10H12O5S  | 243.0331643 | No  |
| 3076 | HMDB0135653                      | {[3-(4-methoxyphenyl)prop-2-en-1-yl]oxy}sulfonic acid               | C10H12O5S  | 243.0331643 | No  |
| 3078 | HMDB0039177                      | 1-O-Galloylglycerol                                                 | C10H12O7   | 243.0530025 | Yes |
| 3079 | HMDB0000296; C00299; CHEBI:16704 | Uridine                                                             | C9H12N2O6  | 243.0626163 | Yes |
| 3079 | HMDB0000767; C02067; CHEBI:17802 | Pseudouridine                                                       | C9H12N2O6  | 243.0626163 | Yes |

|      |                                      |                                                        |            |             |     |
|------|--------------------------------------|--------------------------------------------------------|------------|-------------|-----|
| 3080 | HMDB0006005                          | Indolylacryloylglycine                                 | C13H12N2O3 | 243.0774132 | No  |
| 3080 | HMDB0040734                          | Haematopodin                                           | C13H12N2O3 | 243.0774132 | No  |
| 3081 | HMDB0031237                          | threo-Syringoylglycerol                                | C11H16O6   | 243.0871883 | Yes |
| 3082 | HMDB0014336; CHEBI:3395              | Carbidopa                                              | C10H16N2O5 | 243.0984127 | Yes |
| 3082 | HMDB0028827; CHEBI:73508             | Glutamylproline                                        | C10H16N2O5 | 243.0984127 | Yes |
| 3082 | HMDB0028864                          | Hydroxypropyl-Hydroxyproline                           | C10H16N2O5 | 243.0984127 | Yes |
| 3082 | HMDB0029157                          | gamma-Glutamylproline                                  | C10H16N2O5 | 243.0984127 | Yes |
| 3082 | HMDB0029439                          | (2S,4S)-Pinnatanine                                    | C10H16N2O5 | 243.0984127 | Yes |
| 3084 | HMDB0014437; C07522; CHEBI:4910      | Etomidate                                              | C14H16N2O2 | 243.1112031 | Yes |
| 3085 | HMDB0032472                          | Polyethylene, oxidized                                 | C12H20O5   | 243.1242472 | Yes |
| 3086 | HMDB0028866                          | Hydroxypropyl-Isoleucine                               | C11H20N2O4 | 243.1352339 | Yes |
| 3086 | HMDB0028867                          | Hydroxypropyl-Leucine                                  | C11H20N2O4 | 243.1352339 | Yes |
| 3086 | HMDB0028908                          | Isoleucyl-Hydroxyproline                               | C11H20N2O4 | 243.1352339 | Yes |
| 3086 | HMDB0028930                          | Leucyl-Hydroxyproline                                  | C11H20N2O4 | 243.1352339 | Yes |
| 3088 | HMDB0028910                          | Isoleucyl-Isoleucine                                   | C12H24N2O3 | 243.1711957 | No  |
| 3088 | HMDB0028911                          | Isoleucyl-Leucine                                      | C12H24N2O3 | 243.1711957 | No  |
| 3088 | HMDB0028932                          | Leucyl-Isoleucine                                      | C12H24N2O3 | 243.1711957 | No  |
| 3088 | HMDB0028933; CHEBI:6418              | Leucyl-Leucine                                         | C12H24N2O3 | 243.1711957 | No  |
| 3089 | HMDB0002261; CHEBI:59270             | 2-Hydroxymyristic acid                                 | C14H28O3   | 243.1963815 | No  |
| 3089 | HMDB0010731; CHEBI:42539             | (R)-3-Hydroxy-tetradecanoic acid                       | C14H28O3   | 243.1963815 | No  |
| 3089 | HMDB0032417                          | 3-(L-Menthoxo)-2-methylpropane-1,2-diol                | C14H28O3   | 243.1963815 | No  |
| 3089 | HMDB0059850                          | Ethyl 3-hydroxydodecanoate                             | C14H28O3   | 243.1963815 | No  |
| 3089 | HMDB0061656; CHEBI:85148             | 3-hydroxytetradecanoic acid                            | C14H28O3   | 243.1963815 | No  |
| 3117 | HMDB0028732                          | Asparaginy-Hydroxyproline                              | C9H15N3O5  | 244.094454  | Yes |
| 3117 | HMDB0028858                          | Hydroxypropyl-Asparagine                               | C9H15N3O5  | 244.094454  | Yes |
| 3121 | HMDB0059773; CHEBI:89859             | S-3-oxodecanoyl cysteamine                             | C12H23NO2S | 244.1382426 | Yes |
| 3122 | HMDB0060815                          | Desmethyl frovatriptan                                 | C14H19N3O  | 244.1457488 | No  |
| 3123 | HMDB0000378; CHEBI:73026             | 2-Methylbutyrylcarnitine                               | C12H23NO4  | 244.1549867 | Yes |
| 3123 | HMDB0000688; CHEBI:73025             | Isovalerylcarnitine                                    | C12H23NO4  | 244.1549867 | Yes |
| 3123 | HMDB0013128                          | Valerylcarnitine                                       | C12H23NO4  | 244.1549867 | Yes |
| 3123 | HMDB0041993                          | Pivaloylcarnitine                                      | C12H23NO4  | 244.1549867 | Yes |
| 3137 | HMDB0032822                          | 5-Sulfo-1,3-benzenedicarboxylic acid                   | C8H6O7S    | 244.977229  | Yes |
| 3140 | HMDB0094710; CHEBI:64414             | 3-[3-(Sulfooxy)phenyl]propanoic acid                   | C9H10O6S   | 245.0130299 | Yes |
| 3140 | HMDB0125171                          | 3-[4-(sulfooxy)phenyl]propanoic acid                   | C9H10O6S   | 245.0130299 | Yes |
| 3140 | HMDB0128001                          | (4-ethenyl-2-hydroxy-6-methoxyphenyl)oxidanesulfoni    | C9H10O6S   | 245.0130299 | Yes |
| 3140 | HMDB0130016                          | 2-[4-(sulfooxy)phenyl]propanoic acid                   | C9H10O6S   | 245.0130299 | Yes |
| 3140 | HMDB0134064                          | [2-hydroxy-3-(3-oxopropyl)phenyl]oxidanesulfonic acic  | C9H10O6S   | 245.0130299 | Yes |
| 3140 | HMDB0134069                          | {[1-(2-hydroxyphenyl)-3-oxopropan-2-yl]oxy}sulfonic a  | C9H10O6S   | 245.0130299 | Yes |
| 3140 | HMDB0134071                          | [1-(2-hydroxyphenyl)-3-oxopropoxy]sulfonic acid        | C9H10O6S   | 245.0130299 | Yes |
| 3140 | HMDB0134074                          | [2-hydroxy-3-(3-hydroxyprop-1-en-1-yl)phenyl]oxidane   | C9H10O6S   | 245.0130299 | Yes |
| 3140 | HMDB0134080                          | {[3-(2-hydroxyphenyl)oxiran-2-yl]methoxy}sulfonic acic | C9H10O6S   | 245.0130299 | Yes |
| 3140 | HMDB0134083                          | {[3-(2,5-dihydroxyphenyl)prop-2-en-1-yl]oxy}sulfonic a | C9H10O6S   | 245.0130299 | Yes |
| 3143 | HMDB0135750                          | [3-(4-methoxyphenyl)propoxy]sulfonic acid              | C10H14O5S  | 245.0491872 | Yes |
| 3145 | HMDB0000497; CHEBI:23774             | 5,6-Dihydrouridine                                     | C9H14N2O6  | 245.0781043 | Yes |
| 3145 | HMDB0011160                          | L-alpha-Aspartyl-L-hydroxyproline                      | C9H14N2O6  | 245.0781043 | Yes |
| 3145 | HMDB0028754                          | Aspartyl-Hydroxyproline                                | C9H14N2O6  | 245.0781043 | Yes |
| 3146 | HMDB0013713; CHEBI:74640             | N-acetyltryptophan                                     | C13H14N2O3 | 245.0933478 | No  |
| 3146 | HMDB0014987; C07829; CHEBI:6758      | Methylphenobarbital                                    | C13H14N2O3 | 245.0933478 | No  |
| 3146 | HMDB0030269                          | Nigellicine                                            | C13H14N2O3 | 245.0933478 | No  |
| 3146 | HMDB0060810                          | cyclic 6-Hydroxymelatonin                              | C13H14N2O3 | 245.0933478 | No  |
| 3148 | HMDB0011166                          | L-beta-aspartyl-L-leucine                              | C10H18N2O5 | 245.1147443 | Yes |
| 3148 | HMDB0011172; HMDB0029162; CHEBI:6884 | gamma-Glutamylvaline                                   | C10H18N2O5 | 245.1147443 | Yes |
| 3148 | HMDB0028756                          | Aspartyl-Isoleucine                                    | C10H18N2O5 | 245.1147443 | Yes |
| 3148 | HMDB0028757                          | Aspartyl-Leucine                                       | C10H18N2O5 | 245.1147443 | Yes |
| 3148 | HMDB0028832; HMDB0059717; CHEBI:6884 | Glutamylvaline                                         | C10H18N2O5 | 245.1147443 | Yes |
| 3148 | HMDB0028903                          | Isoleucyl-Aspartate                                    | C10H18N2O5 | 245.1147443 | Yes |
| 3148 | HMDB0028925                          | Leucyl-Aspartate                                       | C10H18N2O5 | 245.1147443 | Yes |
| 3150 | HMDB0061115; C09213                  | Lenticin                                               | C14H18N2O2 | 245.129667  | Yes |
| 3151 | HMDB0000413                          | 3-Hydroxydodecanedioic acid                            | C12H22O5   | 245.1396595 | Yes |
| 3151 | HMDB0031696                          | Dibutyl malate                                         | C12H22O5   | 245.1396595 | Yes |
| 3152 | HMDB0036207                          | alpha-Amylcinnamyl acetate                             | C16H22O2   | 245.1543259 | Yes |

|      |                                   |                                                       |            |             |     |
|------|-----------------------------------|-------------------------------------------------------|------------|-------------|-----|
| 3152 | HMDB0037705                       | Heptyl cinnamate                                      | C16H22O2   | 245.1543259 | Yes |
| 3152 | HMDB0041250                       | Demethoxyshogaol                                      | C16H22O2   | 245.1543259 | Yes |
| 3153 | HMDB0015096; C07528; CHEBI:6759   | Mepivacaine                                           | C15H22N2O  | 245.1660192 | No  |
| 3153 | HMDB0015602; CHEBI:521102         | Milnacipran                                           | C15H22N2O  | 245.1660192 | No  |
| 3165 | HMDB0062547; CHEBI:82942          | 2-Hydroxyacetaminophen sulfate                        | C8H9NO6S   | 246.0083    | Yes |
| 3167 | HMDB0128628                       | 2-[[hydroxy(1-oxo-1H-isochromen-3-yl)methylidene]ar   | C12H9NO5   | 246.0397526 | Yes |
| 3172 | HMDB0029060                       | Threoninyl-Glutamate                                  | C9H15N2O6  | 246.0875497 | Yes |
| 3173 | HMDB0002095; CHEBI:86047          | Malonylcarnitine                                      | C10H17NO6  | 246.0977028 | Yes |
| 3173 | HMDB0033699; C01594; CHEBI:16441  | Linamarin                                             | C10H17NO6  | 246.0977028 | Yes |
| 3173 | HMDB0062592; CHEBI:85470          | O-malonyl-L-carnitine                                 | C10H17NO6  | 246.0977028 | Yes |
| 3193 | HMDB0041788; CHEBI:88847          | Vanillic acid 4-sulfate                               | C8H8O7S    | 246.9921269 | Yes |
| 3193 | HMDB0125151                       | 2-[4-hydroxy-3-(sulfooxy)phenyl]acetic acid           | C8H8O7S    | 246.9921269 | Yes |
| 3193 | HMDB0140929                       | 4-methoxy-3-(sulfooxy)benzoic acid                    | C8H8O7S    | 246.9921269 | Yes |
| 3196 | HMDB0029229                       | 4-Methoxyphenylethanol sulfate                        | C9H12O6S   | 247.0280911 | Yes |
| 3196 | HMDB0128019                       | (4-ethyl-2-hydroxy-6-methoxyphenyl)oxidanesulfonic a  | C9H12O6S   | 247.0280911 | Yes |
| 3198 | HMDB0004185; C05832               | 5-Hydroxyindoleacetyl glycine                         | C12H12N2O4 | 247.0721473 | No  |
| 3198 | HMDB0060537                       | p-Hydroxyphenobarbital                                | C12H12N2O4 | 247.0721473 | No  |
| 3198 | HMDB0060826                       | Hydroxynalidixic acid                                 | C12H12N2O4 | 247.0721473 | No  |
| 3199 | HMDB0028829; CHEBI:73510          | Glutamylthreonine                                     | C9H16N2O6  | 247.0957061 | No  |
| 3199 | HMDB0029159; CHEBI:133747         | gamma-Glutamylthreonine                               | C9H16N2O6  | 247.0957061 | No  |
| 3199 | HMDB0029575                       | (+)-cis-5,6-Dihydro-5-hydroxy-4-methoxy-6-(2-phenyle  | C14H16O4   | 247.0957061 | No  |
| 3199 | HMDB0029774                       | 7-Hydroxy-6-(methoxyacetyl)-2,2-dimethyl-2H-1-benz    | C14H16O4   | 247.0957061 | No  |
| 3199 | HMDB0033515                       | Citreo-virenone                                       | C14H16O4   | 247.0957061 | No  |
| 3199 | HMDB0041140; C10487; CHEBI:8393   | Prenyl cis-cafate                                     | C14H16O4   | 247.0957061 | No  |
| 3199 | HMDB0128964                       | 6-(3-hydroxybutyl)-7-methoxy-2H-chromen-2-one         | C14H16O4   | 247.0957061 | No  |
| 3199 | HMDB0130532                       | 7-hydroxy-6-(3-hydroxy-3-methylbutyl)-2H-chromen-2    | C14H16O4   | 247.0957061 | No  |
| 3199 | HMDB0135890                       | 3-[4-hydroxy-3-(4-hydroxy-3-methylbut-2-en-1-yl)pher  | C14H16O4   | 247.0957061 | No  |
| 3199 | HMDB0135891                       | 3-{4-hydroxy-3-[(2E)-4-hydroxy-3-methylbut-2-en-1-yl] | C14H16O4   | 247.0957061 | No  |
| 3199 | HMDB0135894                       | 3-[3,4-dihydroxy-5-(3-methylbut-2-en-1-yl)phenyl]pro  | C14H16O4   | 247.0957061 | No  |
| 3199 | HMDB0135895                       | 3-[2,4-dihydroxy-3-(3-methylbut-2-en-1-yl)phenyl]pro  | C14H16O4   | 247.0957061 | No  |
| 3199 | HMDB0135896                       | 3-[2,4-dihydroxy-5-(3-methylbut-2-en-1-yl)phenyl]pro  | C14H16O4   | 247.0957061 | No  |
| 3200 | HMDB0004081; C05643; CHEBI:308079 | 6-Hydroxymelatonin                                    | C13H16N2O3 | 247.1082689 | Yes |
| 3200 | HMDB0060069                       | cyclic 3-Hydroxymelatonin                             | C13H16N2O3 | 247.1082689 | Yes |
| 3200 | HMDB0060721                       | 2-Oxomelatonin                                        | C13H16N2O3 | 247.1082689 | Yes |
| 3201 | HMDB0031876; C09808               | Prenyl glucoside                                      | C11H20O6   | 247.1187917 | Yes |
| 3201 | HMDB0033064                       | (E)-2-Methyl-2-buten-1-ol O-beta-D-Glucopyranoside    | C11H20O6   | 247.1187917 | Yes |
| 3202 | HMDB0001931                       | Gamma-CEHC                                            | C15H20O3   | 247.1334827 | No  |
| 3202 | HMDB0030757                       | (S)-Pterodin A                                        | C15H20O3   | 247.1334827 | No  |
| 3202 | HMDB0030888                       | Illudin C2                                            | C15H20O3   | 247.1334827 | No  |
| 3202 | HMDB0030910                       | 2alpha-Hydroxylantolactone                            | C15H20O3   | 247.1334827 | No  |
| 3202 | HMDB0031378                       | 4-Epiisoinuviscolide                                  | C15H20O3   | 247.1334827 | No  |
| 3202 | HMDB0031386                       | (1(10)E,4beta,5alpha,8beta)-4,5-Epoxy-1(10),11(13)-g  | C15H20O3   | 247.1334827 | No  |
| 3202 | HMDB0031387                       | (1beta,4E,8beta,10alpha)-1,10-Epoxy-4,11(13)-germac   | C15H20O3   | 247.1334827 | No  |
| 3202 | HMDB0031970                       | 1beta-Hydroxylantolactone                             | C15H20O3   | 247.1334827 | No  |
| 3202 | HMDB0032649                       | 4,5-Epoxy-11(13)-guaien-12,8-olide                    | C15H20O3   | 247.1334827 | No  |
| 3202 | HMDB0033707                       | Heliannuol E                                          | C15H20O3   | 247.1334827 | No  |
| 3202 | HMDB0034123                       | Eugenyl isovalerate                                   | C15H20O3   | 247.1334827 | No  |
| 3202 | HMDB0035131                       | Heliannuol C                                          | C15H20O3   | 247.1334827 | No  |
| 3202 | HMDB0035132                       | Heliannuol B                                          | C15H20O3   | 247.1334827 | No  |
| 3202 | HMDB0035223                       | (S)-Pterodin D                                        | C15H20O3   | 247.1334827 | No  |
| 3202 | HMDB0035503                       | Pseudoisoeugenol 2-methylbutanoate                    | C15H20O3   | 247.1334827 | No  |
| 3202 | HMDB0035708                       | 8-Epiisovangustin                                     | C15H20O3   | 247.1334827 | No  |
| 3202 | HMDB0035903                       | Enokipodin A                                          | C15H20O3   | 247.1334827 | No  |
| 3202 | HMDB0036005                       | Istanbulin B                                          | C15H20O3   | 247.1334827 | No  |
| 3202 | HMDB0036040                       | Marasmen-3-one                                        | C15H20O3   | 247.1334827 | No  |
| 3202 | HMDB0036641; C09301               | Artabsin                                              | C15H20O3   | 247.1334827 | No  |
| 3202 | HMDB0036770                       | Desacetyl laurenobiolide                              | C15H20O3   | 247.1334827 | No  |
| 3202 | HMDB0036772                       | Glechomafuran                                         | C15H20O3   | 247.1334827 | No  |
| 3202 | HMDB0037022                       | Cichoralixin                                          | C15H20O3   | 247.1334827 | No  |
| 3202 | HMDB0037557                       | 1alpha-1-Hydroxy-2,4(18),11(13)-eudesmatrien-12-oic   | C15H20O3   | 247.1334827 | No  |
| 3202 | HMDB0037800                       | Annuolide B                                           | C15H20O3   | 247.1334827 | No  |

|      |                                   |                                                                    |             |             |     |
|------|-----------------------------------|--------------------------------------------------------------------|-------------|-------------|-----|
| 3202 | HMDB0038326                       | Annulide E                                                         | C15H20O3    | 247.1334827 | No  |
| 3202 | HMDB0038794                       | 2,12-Epoxy-7(14)-illudadiene-3,8-diol                              | C15H20O3    | 247.1334827 | No  |
| 3202 | HMDB0039859                       | Glandulone C                                                       | C15H20O3    | 247.1334827 | No  |
| 3202 | HMDB0134144                       | (2Z)-3-hydroxy-2-(phenylmethylidene)octanoic acid                  | C15H20O3    | 247.1334827 | No  |
| 3202 | HMDB0134145                       | (2Z)-2-[(3-hydroxyphenyl)methylidene]octanoic acid                 | C15H20O3    | 247.1334827 | No  |
| 3202 | HMDB0134146                       | (2Z)-2-[(4-hydroxyphenyl)methylidene]octanoic acid                 | C15H20O3    | 247.1334827 | No  |
| 3202 | HMDB0134147                       | (2Z)-7-hydroxy-2-(phenylmethylidene)octanoic acid                  | C15H20O3    | 247.1334827 | No  |
| 3202 | HMDB0134148                       | 2-hexyl-3-phenyloxirane-2-carboxylic acid                          | C15H20O3    | 247.1334827 | No  |
| 3202 | HMDB0134149                       | (2Z)-8-hydroxy-2-(phenylmethylidene)octanoic acid                  | C15H20O3    | 247.1334827 | No  |
| 3202 | HMDB0134150                       | (2Z)-2-[(2-hydroxyphenyl)methylidene]octanoic acid                 | C15H20O3    | 247.1334827 | No  |
| 3203 | HMDB0015095; C07445; CHEBI:8214   | Pindolol                                                           | C14H20N2O2  | 247.1453638 | No  |
| 3221 | HMDB0001915; C07752; CHEBI:2567   | Alendronic acid                                                    | C4H13NO7P2  | 248.0088891 | Yes |
| 3222 | HMDB0002062                       | Norepinephrine sulfate                                             | C8H11NO6S   | 248.023921  | Yes |
| 3223 | HMDB0028774                       | Cysteinyl-Glutamate                                                | C8H13N2O5S  | 248.0462393 | Yes |
| 3224 | HMDB0015028; CHEBI:132842         | Sulfapyridine                                                      | C11H11N3O2S | 248.0501993 | No  |
| 3230 | HMDB0060070                       | Melatonin radical                                                  | C13H17N2O3  | 248.1147645 | No  |
| 3231 | HMDB0094646                       | 2-Pentanamido-3-phenylpropanoic acid                               | C14H19NO3   | 248.1288462 | No  |
| 3232 | HMDB0060531                       | Desmethylnortriptyline                                             | C18H19N     | 248.1445132 | No  |
| 3234 | HMDB0015004; CHEBI:51211          | Alprenolol                                                         | C15H23NO2   | 248.1655266 | No  |
| 3234 | HMDB0060852; CHEBI:83529          | N,O-Didesmethylvenlafaxine                                         | C15H23NO2   | 248.1655266 | No  |
| 3234 | HMDB0060997                       | O-Desmethyltramadol                                                | C15H23NO2   | 248.1655266 | No  |
| 3234 | HMDB0061007                       | N-Desmethyltramadol                                                | C15H23NO2   | 248.1655266 | No  |
| 3248 | HMDB0126639                       | 3,5-dihydroxy-4-(sulfoxy)benzoic acid                              | C7H6O8S     | 248.9714595 | Yes |
| 3248 | HMDB0130471                       | 2,4-dihydroxy-3-(sulfoxy)benzoic acid                              | C7H6O8S     | 248.9714595 | Yes |
| 3253 | HMDB0039464                       | (E)-2-Propenyl [3-(2-propenylthio)-2-propenyl] sulfate             | C9H14O4S2   | 249.0265325 | No  |
| 3257 | HMDB0032353                       | Isopropyl citrate                                                  | C10H18O7    | 249.0982053 | Yes |
| 3260 | HMDB0015443; C17725; CHEBI:588074 | Heptabarbital                                                      | C13H18N2O3  | 249.1240203 | Yes |
| 3260 | HMDB0029876; C03002               | Paucine                                                            | C13H18N2O3  | 249.1240203 | Yes |
| 3260 | HMDB0033462                       | 4-Coumaroyl-2-hydroxyputrescine                                    | C13H18N2O3  | 249.1240203 | Yes |
| 3260 | HMDB0060742                       | 3-Hydroxymelatonin                                                 | C13H18N2O3  | 249.1240203 | Yes |
| 3260 | HMDB0139529                       | (2E)-N-(4-aminobutyl)-3-(3,4-dihydroxyphenyl)prop-2-yn-1-ol        | C13H18N2O3  | 249.1240203 | Yes |
| 3260 | HMDB0139530                       | N-(4-aminobutyl)-3-(4-hydroxyphenyl)oxirane-2-carboxylic acid      | C13H18N2O3  | 249.1240203 | Yes |
| 3260 | HMDB0139613                       | N-(4-aminobutyl)-3-(3,4-dihydroxyphenyl)prop-2-en-1-ol             | C13H18N2O3  | 249.1240203 | Yes |
| 3260 | HMDB0139973                       | (2E)-N-(3-aminopropyl)-3-(4-hydroxy-3-methoxyphenyl)prop-2-en-1-ol | C13H18N2O3  | 249.1240203 | Yes |
| 3261 | HMDB0015371; C07020; CHEBI:5296   | Gemfibrozil                                                        | C15H22O3    | 249.1498519 | No  |
| 3261 | HMDB0030917                       | 1-Hydroxyacorenone                                                 | C15H22O3    | 249.1498519 | No  |
| 3261 | HMDB0031901                       | Blennin A                                                          | C15H22O3    | 249.1498519 | No  |
| 3261 | HMDB0034721                       | Procurcumadiol                                                     | C15H22O3    | 249.1498519 | No  |
| 3261 | HMDB0035117                       | (3beta,6beta)-Furanoeremophilane-3,6-diol                          | C15H22O3    | 249.1498519 | No  |
| 3261 | HMDB0035137                       | Heliannuol D                                                       | C15H22O3    | 249.1498519 | No  |
| 3261 | HMDB0035148                       | (6beta,8alpha)-6-Hydroxy-7(11)-eremophilen-12,8-olide              | C15H22O3    | 249.1498519 | No  |
| 3261 | HMDB0035358                       | Ketosantallic acid                                                 | C15H22O3    | 249.1498519 | No  |
| 3261 | HMDB0035760                       | 3-Hydroxytrichothecene                                             | C15H22O3    | 249.1498519 | No  |
| 3261 | HMDB0035798; C09711               | Piperdial                                                          | C15H22O3    | 249.1498519 | No  |
| 3261 | HMDB0036036                       | 3beta-Dihydroxymarasmene                                           | C15H22O3    | 249.1498519 | No  |
| 3261 | HMDB0036037                       | 13-Hydroxymarasmene                                                | C15H22O3    | 249.1498519 | No  |
| 3261 | HMDB0036550                       | 3-Ketoapotrithothecene                                             | C15H22O3    | 249.1498519 | No  |
| 3261 | HMDB0036563                       | Valerenolic acid                                                   | C15H22O3    | 249.1498519 | No  |
| 3261 | HMDB0036664                       | Ketopelenolide a                                                   | C15H22O3    | 249.1498519 | No  |
| 3261 | HMDB0037064                       | FS4 toxin                                                          | C15H22O3    | 249.1498519 | No  |
| 3261 | HMDB0037529                       | Lactaronecatorin A                                                 | C15H22O3    | 249.1498519 | No  |
| 3261 | HMDB0037559                       | Cadabacilone                                                       | C15H22O3    | 249.1498519 | No  |
| 3261 | HMDB0039156                       | 3beta-Hydroxycinnamolide                                           | C15H22O3    | 249.1498519 | No  |
| 3261 | HMDB0039635                       | Absciscic alcohol                                                  | C15H22O3    | 249.1498519 | No  |
| 3261 | HMDB0039644                       | Heliannuol A                                                       | C15H22O3    | 249.1498519 | No  |
| 3261 | HMDB0040754                       | (3beta,8beta)-3-Hydroxy-7(11)-eremophilen-12,8-olide               | C15H22O3    | 249.1498519 | No  |
| 3261 | HMDB0061839                       | Ethylhexyl salicylate                                              | C15H22O3    | 249.1498519 | No  |
| 3279 | HMDB0029355                       | N-Phenylacetylaspatic acid                                         | C12H13NO5   | 250.0723271 | No  |
| 3279 | HMDB0039102                       | N-Carboxyacetyl-D-phenylalanine                                    | C12H13NO5   | 250.0723271 | No  |
| 3279 | HMDB0059747; C02564; CHEBI:17691  | 4-Hydroxy-3-methoxy-cinnamoylglycine                               | C12H13NO5   | 250.0723271 | No  |
| 3309 | HMDB0028781                       | Cysteinyl-Methionine                                               | C8H16N2O3S2 | 251.0526647 | Yes |



|      |                                    |                                                        |             |             |     |
|------|------------------------------------|--------------------------------------------------------|-------------|-------------|-----|
| 3309 | HMDB0028970                        | Methionyl-Cysteine                                     | C8H16N2O3S2 | 251.0526647 | Yes |
| 3310 | HMDB0004086; C05648; CHEBI:2065    | 5-Hydroxy-N-formylkynurenine                           | C11H12N2O5  | 251.0679293 | Yes |
| 3310 | HMDB0035993                        | N5-(3,4-Dioxo-1,5-cyclohexadien-1-yl)-L-glutamine      | C11H12N2O5  | 251.0679293 | Yes |
| 3311 | HMDB0000071; C05512; CHEBI:28997   | Deoxyinosine                                           | C10H12N4O4  | 251.0788703 | Yes |
| 3311 | HMDB0029956; C01736; CHEBI:139743  | Nebularine                                             | C10H12N4O4  | 251.0788703 | Yes |
| 3312 | HMDB0030668                        | 1-(2,4,6-Trimethoxyphenyl)-1,3-butanedione             | C13H16O5    | 251.0927794 | Yes |
| 3312 | HMDB0038551; CHEBI:86898           | Methyl 3,4,5-trimethoxycinnamate                       | C13H16O5    | 251.0927794 | Yes |
| 3312 | HMDB0125460                        | 2-[2,4,6-trihydroxy-3-(3-methylbut-2-en-1-yl)phenyl]ac | C13H16O5    | 251.0927794 | Yes |
| 3312 | HMDB0137142                        | 2-[2,4-dihydroxy-3-(3-methylbut-2-en-1-yl)phenyl]-2-h  | C13H16O5    | 251.0927794 | Yes |
| 3314 | HMDB0014644; C06952; CHEBI:3699    | Cimetidine                                             | C10H16N6S   | 251.1084794 | No  |
| 3314 | HMDB0033317                        | (1Z,4Z)-1,5-bis(4-hydroxyphenyl)-1,4-pentadiene        | C17H16O2    | 251.1084794 | No  |
| 3314 | HMDB0035018                        | 2-Phenylethyl 3-phenyl-2-propenoate                    | C17H16O2    | 251.1084794 | No  |
| 3314 | HMDB0037707                        | Cinnamyl phenylacetate                                 | C17H16O2    | 251.1084794 | No  |
| 3315 | HMDB0040822                        | 2,3-Butanediol glucoside                               | C10H20O7    | 251.1137965 | Yes |
| 3316 | HMDB0033197                        | 2,2,4,4-Tetramethyl-6-(1-oxobutyl)-1,3,5-cyclohexanet  | C14H20O4    | 251.1264481 | Yes |
| 3316 | HMDB0036047                        | 3alpha-Hydroxyoreadone                                 | C14H20O4    | 251.1264481 | Yes |
| 3316 | HMDB0059661; CHEBI:17976           | QH(2)                                                  | C14H20O4    | 251.1264481 | Yes |
| 3317 | HMDB0014451                        | Talbutal                                               | C13H20N2O3  | 251.139883  | Yes |
| 3317 | HMDB0139534                        | N-(4-aminobutyl)-3-(3,4-dihydroxyphenyl)propanimidic   | C13H20N2O3  | 251.139883  | Yes |
| 3321 | HMDB0030918                        | 1-Hydroxyepiacorone                                    | C15H24O3    | 251.1653901 | No  |
| 3321 | HMDB0030919                        | Acorusdiol                                             | C15H24O3    | 251.1653901 | No  |
| 3321 | HMDB0032122                        | 3(4->5)-Abeo-4,11:4,12-diepoxy-3-eudesmanol            | C15H24O3    | 251.1653901 | No  |
| 3321 | HMDB0033149                        | (4R,5S,7R,11R)-11,12-Dihydroxy-1(10)-spirovetiven-2-ol | C15H24O3    | 251.1653901 | No  |
| 3321 | HMDB0034574                        | Apotrichodiol                                          | C15H24O3    | 251.1653901 | No  |
| 3321 | HMDB0035309                        | 6alpha-Carissanol                                      | C15H24O3    | 251.1653901 | No  |
| 3321 | HMDB0035597                        | alpha-Carissanol                                       | C15H24O3    | 251.1653901 | No  |
| 3321 | HMDB0035613                        | Epioxylubimin                                          | C15H24O3    | 251.1653901 | No  |
| 3321 | HMDB0035729                        | Dihydromyoporone                                       | C15H24O3    | 251.1653901 | No  |
| 3321 | HMDB0035767                        | Piperalol                                              | C15H24O3    | 251.1653901 | No  |
| 3321 | HMDB0036448                        | Zedoarondiol                                           | C15H24O3    | 251.1653901 | No  |
| 3321 | HMDB0036663                        | Hydroxypelenolide                                      | C15H24O3    | 251.1653901 | No  |
| 3321 | HMDB0037063                        | Toxin FS2                                              | C15H24O3    | 251.1653901 | No  |
| 3321 | HMDB0037969                        | Urodiolenone                                           | C15H24O3    | 251.1653901 | No  |
| 3321 | HMDB0038502                        | Bisacurone B                                           | C15H24O3    | 251.1653901 | No  |
| 3321 | HMDB0040685                        | 2,3-Dihydroabscisic alcohol                            | C15H24O3    | 251.1653901 | No  |
| 3321 | HMDB0112086                        | 3-Methyl-5-pentyl-2-furanpentanoic acid                | C15H24O3    | 251.1653901 | No  |
| 3321 | HMDB0112094                        | 3-Methyl-5-propyl-2-furanheptanoic acid                | C15H24O3    | 251.1653901 | No  |
| 3323 | HMDB0000477; CHEBI:86147           | 7Z,10Z-Hexadecadienoic acid                            | C16H28O2    | 251.2017014 | No  |
| 3323 | HMDB0029351                        | Geranyl hexanoate                                      | C16H28O2    | 251.2017014 | No  |
| 3323 | HMDB0030429                        | Linalyl hexanoate                                      | C16H28O2    | 251.2017014 | No  |
| 3323 | HMDB0031086                        | (Z)-7-Hexadecen-1,16-olide                             | C16H28O2    | 251.2017014 | No  |
| 3323 | HMDB0032340                        | Isoambrettolide                                        | C16H28O2    | 251.2017014 | No  |
| 3323 | HMDB0037805                        | D6-Ambrettolide                                        | C16H28O2    | 251.2017014 | No  |
| 3323 | HMDB0038255                        | Geranyl 2-ethylbutyrate                                | C16H28O2    | 251.2017014 | No  |
| 3323 | HMDB0039131                        | Ethyl (Z,Z)-5,8-tetradecadienoate                      | C16H28O2    | 251.2017014 | No  |
| 3339 | HMDB0015150; C07315; CHEBI:9332    | Sulfamethoxazole                                       | C10H11N3O3S | 252.0452048 | No  |
| 3341 | HMDB0000727; CHEBI:49751           | L-Threoneopterin                                       | C9H11N5O4   | 252.0730104 | No  |
| 3341 | HMDB0000845; C05926                | Neopterin                                              | C9H11N5O4   | 252.0730104 | No  |
| 3341 | HMDB0000877                        | Umanopterin                                            | C9H11N5O4   | 252.0730104 | No  |
| 3341 | HMDB0002109                        | Hydroxysepiapterin                                     | C9H11N5O4   | 252.0730104 | No  |
| 3341 | HMDB0029895                        | D-erythro-Eritadenine                                  | C9H11N5O4   | 252.0730104 | No  |
| 3345 | HMDB0001940; D00386; CHEBI:117411  | Triamterene                                            | C12H11N7    | 252.1003827 | Yes |
| 3345 | HMDB0032758                        | Ethyl 3-methyl-9H-carbazole-9-carboxylate              | C16H15NO2   | 252.1003827 | Yes |
| 3345 | HMDB0041319                        | Cinnamyl anthranilate                                  | C16H15NO2   | 252.1003827 | Yes |
| 3346 | HMDB0014444; C07417; CHEBI:7956    | Penciclovir                                            | C10H15N5O3  | 252.1120827 | No  |
| 3376 | HMDB0060603                        | N-acetyl zonisamide                                    | C10H10N2O4S | 253.0291961 | No  |
| 3377 | HMDB0003312; C10208; CHEBI:28197   | Daidzein                                               | C15H10O4    | 253.0507345 | No  |
| 3377 | HMDB0004195; C05844                | 5-L-Glutamyl-L-tyrosine                                | C7H14N2O6S  | 253.0507345 | No  |
| 3377 | HMDB0030670; C10315; CHEBI:3687    | Chrysophanol                                           | C15H10O4    | 253.0507345 | No  |
| 3377 | HMDB0030699; C02168; CHEBI:1012277 | 5,7-Dihydroxyisoflavone                                | C15H10O4    | 253.0507345 | No  |
| 3377 | HMDB0030874                        | Phomarin                                               | C15H10O4    | 253.0507345 | No  |

|      |                                  |                                                                     |             |             |     |
|------|----------------------------------|---------------------------------------------------------------------|-------------|-------------|-----|
| 3377 | HMDB0033153; C08644; CHEBI:5731  | (Z)-4",6-Dihydroxyaurone                                            | C15H10O4    | 253.0507345 | No  |
| 3377 | HMDB0036619; C10028              | 5,7-Dihydroxyflavone                                                | C15H10O4    | 253.0507345 | No  |
| 3377 | HMDB0130498                      | 6,7-dihydroxy-3-phenyl-4H-chromen-4-one                             | C15H10O4    | 253.0507345 | No  |
| 3377 | HMDB0130504                      | 7-hydroxy-3-(3-hydroxyphenyl)-4H-chromen-4-one                      | C15H10O4    | 253.0507345 | No  |
| 3377 | HMDB0130510                      | 7,8-dihydroxy-3-phenyl-4H-chromen-4-one                             | C15H10O4    | 253.0507345 | No  |
| 3377 | HMDB0130907                      | 5,6-dihydroxy-2-phenyl-4H-chromen-4-one                             | C15H10O4    | 253.0507345 | No  |
| 3377 | HMDB0130927                      | 6,7-dihydroxy-2-phenyl-4H-chromen-4-one                             | C15H10O4    | 253.0507345 | No  |
| 3377 | HMDB0133314                      | 7-hydroxy-2-(3-hydroxyphenyl)-4H-chromen-4-one                      | C15H10O4    | 253.0507345 | No  |
| 3377 | HMDB0134545                      | 3-hydroxy-2-(2-hydroxyphenyl)-4H-chromen-4-one                      | C15H10O4    | 253.0507345 | No  |
| 3377 | HMDB0134546                      | 3,6-dihydroxy-2-phenyl-4H-chromen-4-one                             | C15H10O4    | 253.0507345 | No  |
| 3377 | HMDB0134547                      | 3,7-dihydroxy-2-phenyl-4H-chromen-4-one                             | C15H10O4    | 253.0507345 | No  |
| 3377 | HMDB0134548                      | 3-hydroxy-2-(3-hydroxyphenyl)-4H-chromen-4-one                      | C15H10O4    | 253.0507345 | No  |
| 3377 | HMDB0134549                      | 3-hydroxy-2-(4-hydroxyphenyl)-4H-chromen-4-one                      | C15H10O4    | 253.0507345 | No  |
| 3377 | HMDB0134550                      | 3,5-dihydroxy-2-phenyl-4H-chromen-4-one                             | C15H10O4    | 253.0507345 | No  |
| 3377 | HMDB0137521                      | 5,6-dihydroxy-2-(phenylmethylidene)-2,3-dihydro-1-benzofuran        | C15H10O4    | 253.0507345 | No  |
| 3377 | HMDB0137524                      | 6,7-dihydroxy-2-(phenylmethylidene)-2,3-dihydro-1-benzofuran        | C15H10O4    | 253.0507345 | No  |
| 3377 | HMDB0137527                      | 4,6-dihydroxy-2-(phenylmethylidene)-2,3-dihydro-1-benzofuran        | C15H10O4    | 253.0507345 | No  |
| 3377 | HMDB0137530                      | 6-hydroxy-2-[(3-hydroxyphenyl)methylidene]-2,3-dihydro-1-benzofuran | C15H10O4    | 253.0507345 | No  |
| 3377 | HMDB0137607                      | 6-hydroxy-2-[(4-hydroxyphenyl)methylidene]-2,3-dihydro-1-benzofuran | C15H10O4    | 253.0507345 | No  |
| 3377 | HMDB0140470                      | 2-(3,5-dihydroxyphenyl)-4H-chromen-4-one                            | C15H10O4    | 253.0507345 | No  |
| 3378 | HMDB0029445                      | L-Agaridoxin                                                        | C11H14N2O5  | 253.0834559 | Yes |
| 3378 | HMDB0060669; C16584; CHEBI:80584 | p-Hydroxyfelbamate                                                  | C11H14N2O5  | 253.0834559 | Yes |
| 3378 | HMDB0060670; C16582              | 2-Hydroxyfelbamate                                                  | C11H14N2O5  | 253.0834559 | Yes |
| 3379 | HMDB0006790; C05401; CHEBI:15754 | Galactosylglycerol                                                  | C9H18O8     | 253.0929559 | Yes |
| 3379 | HMDB0014789; C07819; CHEBI:4728  | Dyphylline                                                          | C10H14N4O4  | 253.0929559 | Yes |
| 3379 | HMDB0038664                      | (2R)-1-O-beta-D-Galactopyranosylglycerol                            | C9H18O8     | 253.0929559 | Yes |
| 3380 | HMDB0015285; C07846; CHEBI:9536  | Thiamylal                                                           | C12H18N2O2S | 253.1008275 | Yes |
| 3382 | HMDB0014356; C07890; CHEBI:6933  | Midodrine                                                           | C12H18N2O4  | 253.119784  | Yes |
| 3382 | HMDB0029390                      | L-Furosine                                                          | C12H18N2O4  | 253.119784  | Yes |
| 3382 | HMDB0029443                      | L-Pyridosine                                                        | C12H18N2O4  | 253.119784  | Yes |
| 3382 | HMDB0033143                      | Pyrraline                                                           | C12H18N2O4  | 253.119784  | Yes |
| 3382 | HMDB0037817                      | Aldosine                                                            | C12H18N2O4  | 253.119784  | Yes |
| 3383 | HMDB0005767                      | Homoanserine                                                        | C11H18N4O3  | 253.1306602 | Yes |
| 3383 | HMDB0028898                      | Histidinyl-Valine                                                   | C11H18N4O3  | 253.1306602 | Yes |
| 3383 | HMDB0029129                      | Valyl-Histidine                                                     | C11H18N4O3  | 253.1306602 | Yes |
| 3383 | HMDB0037180                      | (S)-Argpyrimidine                                                   | C11H18N4O3  | 253.1306602 | Yes |
| 3385 | HMDB0029604                      | Lubiminol                                                           | C15H26O3    | 253.1811511 | No  |
| 3385 | HMDB0035780                      | 8-Hydroxy-4(6)-lactarene-5,14-diol                                  | C15H26O3    | 253.1811511 | No  |
| 3385 | HMDB0036053                      | (3beta,9beta)-7-Drime-3,11,12-triol                                 | C15H26O3    | 253.1811511 | No  |
| 3385 | HMDB0036866                      | 7-Drime-11,12,14-triol                                              | C15H26O3    | 253.1811511 | No  |
| 3385 | HMDB0037197                      | Kessyl glycol                                                       | C15H26O3    | 253.1811511 | No  |
| 3385 | HMDB0040276                      | 5-Acetoxydihydrotheaspirane                                         | C15H26O3    | 253.1811511 | No  |
| 3387 | HMDB0002186; CHEBI:35465         | Hypogeic acid                                                       | C16H30O2    | 253.2171588 | No  |
| 3387 | HMDB0003229; C08362; CHEBI:28716 | Palmitoleic acid                                                    | C16H30O2    | 253.2171588 | No  |
| 3387 | HMDB0010735; CHEBI:37252         | Trans-Hexa-dec-2-enoic acid                                         | C16H30O2    | 253.2171588 | No  |
| 3387 | HMDB0012328; CHEBI:59265         | Palmitelaidic acid                                                  | C16H30O2    | 253.2171588 | No  |
| 3387 | HMDB0031053                      | (E)-6-Hexadecenoic acid                                             | C16H30O2    | 253.2171588 | No  |
| 3387 | HMDB0031145                      | 5-Dodecyldihydro-2(3H)-furanone                                     | C16H30O2    | 253.2171588 | No  |
| 3387 | HMDB0031711                      | 15-Hexadecanolide                                                   | C16H30O2    | 253.2171588 | No  |
| 3387 | HMDB0032638                      | (Z)-5-Hexadecenoic acid                                             | C16H30O2    | 253.2171588 | No  |
| 3387 | HMDB0033791                      | (E)-3-Hexadecenoic acid                                             | C16H30O2    | 253.2171588 | No  |
| 3387 | HMDB0035877                      | (Z)-13-Hexadecenoic acid                                            | C16H30O2    | 253.2171588 | No  |
| 3387 | HMDB0037647                      | (E)-11-Hexadecenoic acid                                            | C16H30O2    | 253.2171588 | No  |
| 3387 | HMDB0038958                      | Citronellyl hexanoate                                               | C16H30O2    | 253.2171588 | No  |
| 3387 | HMDB0041422                      | (Z)-14-Methyl-6-pentadecenoic acid                                  | C16H30O2    | 253.2171588 | No  |
| 3403 | HMDB0125091                      | 3,5,7-trihydroxy-2-phenyl-1??-chromen-1-ylum                        | C15H11O4    | 254.0612391 | No  |
| 3404 | HMDB0002275; C04874; CHEBI:17001 | 7,8-Dihydroneopterin                                                | C9H13N5O4   | 254.0897992 | Yes |
| 3404 | HMDB0015139; CHEBI:465284        | Ganciclovir                                                         | C9H13N5O4   | 254.0897992 | Yes |
| 3421 | HMDB0060649                      | Ascorbic acid-2-sulfate                                             | C6H8O9S     | 254.9811836 | Yes |
| 3422 | HMDB0030809; CHEBI:997963        | (2R,3S)-Piscidic acid                                               | C11H12O7    | 255.0511849 | Yes |
| 3423 | HMDB0005760; CHEBI:75842         | Dihydrodaidzein                                                     | C15H12O4    | 255.0665024 | Yes |

|      |                                   |                                                                                     |            |             |     |
|------|-----------------------------------|-------------------------------------------------------------------------------------|------------|-------------|-----|
| 3423 | HMDB0029462                       | (E)-2,4,4''-Trihydroxychalcone                                                      | C15H12O4   | 255.0665024 | Yes |
| 3423 | HMDB0029519; C09762; CHEBI:536636 | (2S)-Liquiritigenin                                                                 | C15H12O4   | 255.0665024 | Yes |
| 3423 | HMDB0030808; C09827; CHEBI:215489 | (S)-Pinocembrin                                                                     | C15H12O4   | 255.0665024 | Yes |
| 3423 | HMDB0032577                       | 4''-Methoxybenzophenone-2-carboxylic acid                                           | C15H12O4   | 255.0665024 | Yes |
| 3423 | HMDB0033904                       | 7E-Mycosinyl acetate                                                                | C15H12O4   | 255.0665024 | Yes |
| 3423 | HMDB0036457                       | Emodinanthranol                                                                     | C15H12O4   | 255.0665024 | Yes |
| 3423 | HMDB0037316; C08650               | Isoliquiritigenin                                                                   | C15H12O4   | 255.0665024 | Yes |
| 3423 | HMDB0041647                       | 2-Dehydro-O-desmethylangolensin                                                     | C15H12O4   | 255.0665024 | Yes |
| 3423 | HMDB0061744; CHEBI:132612         | Mono-benzyl phthalate                                                               | C15H12O4   | 255.0665024 | Yes |
| 3423 | HMDB0128077                       | 3-phenyl-1-(2,4,6-trihydroxyphenyl)prop-2-en-1-one                                  | C15H12O4   | 255.0665024 | Yes |
| 3423 | HMDB0129959                       | 5,7-dihydroxy-3-phenyl-3,4-dihydro-2H-1-benzopyran-                                 | C15H12O4   | 255.0665024 | Yes |
| 3423 | HMDB0134575                       | 5,8-dihydroxy-2-phenyl-3,4-dihydro-2H-1-benzopyran-                                 | C15H12O4   | 255.0665024 | Yes |
| 3423 | HMDB0137512                       | 6-hydroxy-2-[(4-hydroxyphenyl)methyl]-2,3-dihydro-1-                                | C15H12O4   | 255.0665024 | Yes |
| 3423 | HMDB0137518                       | 2-[(4-hydroxyphenyl)methylidene]-2,3-dihydro-1-benz-                                | C15H12O4   | 255.0665024 | Yes |
| 3423 | HMDB0137526                       | 2-benzyl-6,7-dihydroxy-2,3-dihydro-1-benzofuran-3-or                                | C15H12O4   | 255.0665024 | Yes |
| 3423 | HMDB0138504                       | 8,17-dioxatetracyclo[8.7.0.0.0 <sup>2</sup> ,7.0 <sup>11</sup> ,']heptadeca-2(7),3, | C15H12O4   | 255.0665024 | Yes |
| 3423 | HMDB0141337                       | (2S)-5,7-dihydroxy-2-phenyl-3,4-dihydro-2H-1-benzopy                                | C15H12O4   | 255.0665024 | Yes |
| 3425 | HMDB0141328                       | 3-hydroxy-3-(3,4,5-trimethoxyphenyl)propanoic acid                                  | C12H16O6   | 255.0880024 | Yes |
| 3425 | HMDB0141330                       | 2-hydroxy-3-(3,4,5-trimethoxyphenyl)propanoic acid                                  | C12H16O6   | 255.0880024 | Yes |
| 3425 | HMDB0142079                       | 3-hydroxy-3-(2,3,4-trimethoxyphenyl)propanoic acid                                  | C12H16O6   | 255.0880024 | Yes |
| 3425 | HMDB0142082                       | 2-hydroxy-3-(2,3,4-trimethoxyphenyl)propanoic acid                                  | C12H16O6   | 255.0880024 | Yes |
| 3427 | HMDB0011648; C15497; CHEBI:55458  | 1-(beta-D-Ribofuranosyl)-1,4-dihydronicotinamide                                    | C11H16N2O5 | 255.0995025 | No  |
| 3428 | HMDB0015190; C06975; CHEBI:4753   | Echothiophate                                                                       | C9H23NO3PS | 255.1066433 | No  |
| 3429 | HMDB0031772                       | 1-Methoxy-1-(2,4,5-trimethoxyphenyl)-2-propanol                                     | C13H20O5   | 255.1238258 | Yes |
| 3429 | HMDB0040352                       | 2-[4-(3-Hydroxypropyl)-2-methoxyphenoxy]-1,3-propa                                  | C13H20O5   | 255.1238258 | Yes |
| 3434 | HMDB0040904                       | Ipomeatetrahydrofuran                                                               | C15H28O3   | 255.1977407 | No  |
| 3435 | HMDB0000220; C00249; CHEBI:15756  | Palmitic acid                                                                       | C16H32O2   | 255.2330955 | Yes |
| 3435 | HMDB0002396; CHEBI:58966          | Trimethyltridecanoic acid                                                           | C16H32O2   | 255.2330955 | Yes |
| 3435 | HMDB0031068; CHEBI:84890          | Isopalmitic acid                                                                    | C16H32O2   | 255.2330955 | Yes |
| 3435 | HMDB0032065                       | Butyl dodecanoate                                                                   | C16H32O2   | 255.2330955 | Yes |
| 3435 | HMDB0032249                       | Dodecyl butyrate                                                                    | C16H32O2   | 255.2330955 | Yes |
| 3435 | HMDB0032324                       | Hexyl decanoate                                                                     | C16H32O2   | 255.2330955 | Yes |
| 3435 | HMDB0033166                       | Octyl octanoate                                                                     | C16H32O2   | 255.2330955 | Yes |
| 3435 | HMDB0034153; CHEBI:84849          | Ethyl tetradecanoate                                                                | C16H32O2   | 255.2330955 | Yes |
| 3435 | HMDB0036210                       | Dodecyl 2-methylpropanoate                                                          | C16H32O2   | 255.2330955 | Yes |
| 3459 | HMDB0000982; CHEBI:20607          | 5-Methylcytidine                                                                    | C10H15N3O5 | 256.093248  | Yes |
| 3459 | HMDB0039229                       | Pyro-L-glutaminy-L-glutamine                                                        | C10H15N3O5 | 256.093248  | Yes |
| 3464 | HMDB0013161                       | 2-Hexenoylcarnitine                                                                 | C13H23NO4  | 256.1559059 | No  |
| 3466 | HMDB0014045; CHEBI:580449         | 3-Methoxymorphinan                                                                  | C17H23NO   | 256.1707393 | No  |
| 3466 | HMDB0014992; C08014; CHEBI:119572 | Levorphanol                                                                         | C17H23NO   | 256.1707393 | No  |
| 3466 | HMDB0060552; CHEBI:29133          | Dextrorphan                                                                         | C17H23NO   | 256.1707393 | No  |
| 3467 | HMDB0013272; CHEBI:74441          | N-Lauroylglycine                                                                    | C14H27NO3  | 256.1921158 | No  |
| 3484 | HMDB0012282; C00404; CHEBI:39949  | PPPi                                                                                | H5O10P3    | 256.902591  | Yes |
| 3493 | HMDB0131180                       | {4-[(1E)-3-methoxy-3-oxoprop-1-en-1-yl]phenyl}oxidan                                | C10H10O6S  | 257.0130187 | Yes |
| 3493 | HMDB0133661                       | (2Z)-3-phenyl-2-[(sulfooxy)methyl]prop-2-enoic acid                                 | C10H10O6S  | 257.0130187 | Yes |
| 3493 | HMDB0133664                       | (2E)-2-methyl-3-[3-(sulfooxy)phenyl]prop-2-enoic acid                               | C10H10O6S  | 257.0130187 | Yes |
| 3493 | HMDB0133667                       | (2E)-2-methyl-3-[4-(sulfooxy)phenyl]prop-2-enoic acid                               | C10H10O6S  | 257.0130187 | Yes |
| 3493 | HMDB0135681                       | [2-hydroxy-5-(3-oxobut-1-en-1-yl)phenyl]oxidanesulfo                                | C10H10O6S  | 257.0130187 | Yes |
| 3501 | HMDB0032527                       | 1,1''-(Tetrahydro-6a-hydroxy-2,3a,5-trimethylfuro[2,3-                              | C12H18O6   | 257.1033649 | Yes |
| 3502 | HMDB0030420                       | Strobilurin A                                                                       | C16H18O3   | 257.116119  | Yes |
| 3502 | HMDB0038614                       | gamma-L-Glutamyl-L-pipecolic acid                                                   | C11H18N2O5 | 257.116119  | Yes |
| 3502 | HMDB0038676                       | (2S,2''S)-Pyrosaccharopine                                                          | C11H18N2O5 | 257.116119  | Yes |
| 3507 | HMDB0000872; C11002; CHEBI:76308  | Tetradecanedioic acid                                                               | C14H26O4   | 257.1758192 | Yes |
| 3507 | HMDB0040429                       | Diethyl decanedioate                                                                | C14H26O4   | 257.1758192 | Yes |
| 3507 | HMDB0041618; C14260               | Diisobutyl adipate                                                                  | C14H26O4   | 257.1758192 | Yes |
| 3507 | HMDB0059946                       | 2-Hydroxypropyl 2-isopropyl-5-methylcyclohexyl carb                                 | C14H26O4   | 257.1758192 | Yes |
| 3507 | HMDB0059947                       | 1-Hydroxypropan-2-yl 2-isopropyl-5-methylcyclohexyl                                 | C14H26O4   | 257.1758192 | Yes |
| 3508 | HMDB0061860                       | 2-Acetyl-3,5,5,6,8,8-hexamethyl-5,6,7,8- tetrahydrona                               | C18H26O    | 257.1899593 | No  |
| 3510 | HMDB0031061                       | 10-Hydroxymyristic acid methyl ester                                                | C15H30O3   | 257.2128361 | No  |
| 3510 | HMDB0059866; CHEBI:87428          | Ethyl 3-hydroxytridecanoate                                                         | C15H30O3   | 257.2128361 | No  |
| 3510 | HMDB0061657                       | 3-hydroxypentadecanoic acid                                                         | C15H30O3   | 257.2128361 | No  |

|      |                                      |                                                        |            |             |     |
|------|--------------------------------------|--------------------------------------------------------|------------|-------------|-----|
| 3530 | HMDB0000592; C04132; CHEBI:743540    | Glucosamine 6-sulfate                                  | C6H13NO8S  | 258.0286088 | Yes |
| 3530 | HMDB0001481; C01075; CHEBI:16702     | N-Sulfo-D-glucosamine                                  | C6H13NO8S  | 258.0286088 | Yes |
| 3534 | HMDB0041934                          | Mizoribine                                             | C9H13N3O6  | 258.0755421 | Yes |
| 3536 | HMDB0028798                          | Glutaminylhydroxyproline                               | C10H17N3O5 | 258.1084222 | No  |
| 3536 | HMDB0028861                          | Hydroxypropyl-L-Glutamine                              | C10H17N3O5 | 258.1084222 | No  |
| 3536 | HMDB0028877                          | Hydroxypropyl-Gamma-glutamate                          | C10H17N3O5 | 258.1084222 | No  |
| 3536 | HMDB0029150                          | Gamma-glutamyl-Hydroxyproline                          | C10H17N3O5 | 258.1084222 | No  |
| 3536 | HMDB0038516; C05939; CHEBI:28004     | Linatine                                               | C10H17N3O5 | 258.1084222 | No  |
| 3537 | HMDB0001849; C07407; CHEBI:8499      | Propranolol                                            | C16H21NO2  | 258.1501589 | No  |
| 3537 | HMDB0015115; CHEBI:321962            | Ramelteon                                              | C16H21NO2  | 258.1501589 | No  |
| 3537 | HMDB0029829                          | Norchalciporyl propionate                              | C16H21NO2  | 258.1501589 | No  |
| 3537 | HMDB0041954                          | Norbutorphanol                                         | C16H21NO2  | 258.1501589 | No  |
| 3552 | HMDB0041706; CHEBI:90242             | Caffeic acid 3-sulfate                                 | C9H8O7S    | 258.9919125 | Yes |
| 3552 | HMDB0041708                          | Caffeic acid 4-sulfate                                 | C9H8O7S    | 258.9919125 | Yes |
| 3552 | HMDB0125409                          | 2-oxo-3-[4-(sulfooxy)phenyl]propanoic acid             | C9H8O7S    | 258.9919125 | Yes |
| 3552 | HMDB0125831                          | 3-[4-(sulfooxy)phenyl]oxirane-2-carboxylic acid        | C9H8O7S    | 258.9919125 | Yes |
| 3552 | HMDB0127962                          | 3-[4-hydroxy-3-(sulfooxy)phenyl]prop-2-enoic acid      | C9H8O7S    | 258.9919125 | Yes |
| 3552 | HMDB0134087                          | 3-[2-hydroxy-3-(sulfooxy)phenyl]prop-2-enoic acid      | C9H8O7S    | 258.9919125 | Yes |
| 3552 | HMDB0135272                          | (2E)-3-[2-hydroxy-3-(sulfooxy)phenyl]prop-2-enoic acid | C9H8O7S    | 258.9919125 | Yes |
| 3554 | HMDB0135261                          | [2-hydroxy-6-methoxy-4-(prop-2-en-1-yl)phenyl]oxidar   | C10H12O6S  | 259.0274247 | No  |
| 3554 | HMDB0135264                          | {2-methoxy-4-[(oxiran-2-yl)methyl]phenyl}oxidanesulf   | C10H12O6S  | 259.0274247 | No  |
| 3554 | HMDB0135659                          | {[3-(2-hydroxy-4-methoxyphenyl)prop-2-en-1-yl]oxy}s    | C10H12O6S  | 259.0274247 | No  |
| 3554 | HMDB0135663                          | {[3-(4-methoxyphenyl)oxiran-2-yl]methoxy}sulfonic aci  | C10H12O6S  | 259.0274247 | No  |
| 3554 | HMDB0135705                          | [2-hydroxy-5-(3-oxobutyl)phenyl]oxidanesulfonic acid   | C10H12O6S  | 259.0274247 | No  |
| 3554 | HMDB0135744                          | {[1-(4-methoxyphenyl)-3-oxopropan-2-yl]oxy}sulfonic    | C10H12O6S  | 259.0274247 | No  |
| 3554 | HMDB0135746                          | [1-(4-methoxyphenyl)-3-oxopropoxy]sulfonic acid        | C10H12O6S  | 259.0274247 | No  |
| 3557 | HMDB0028730                          | Asparaginy-L-Glutamate                                 | C9H14N3O6  | 259.0788511 | Yes |
| 3559 | HMDB0032857; CHEBI:88153             | Glycerol tripropanoate                                 | C12H20O6   | 259.119306  | Yes |
| 3560 | HMDB0011170; HMDB0029152; CHEBI:6843 | gamma-Glutamylisoleucine                               | C11H20N2O5 | 259.1302754 | No  |
| 3560 | HMDB0011171; HMDB0029153; CHEBI:6843 | gamma-Glutamylleucine                                  | C11H20N2O5 | 259.1302754 | No  |
| 3560 | HMDB0028822                          | Glutamylisoleucine                                     | C11H20N2O5 | 259.1302754 | No  |
| 3560 | HMDB0028823; CHEBI:73506             | Glutamylleucine                                        | C11H20N2O5 | 259.1302754 | No  |
| 3563 | HMDB0014413; C07564; CHEBI:8888      | Ropinirole                                             | C16H24N2O  | 259.1819114 | Yes |
| 3563 | HMDB0015070; C07363; CHEBI:142520    | Oxymetazoline                                          | C16H24N2O  | 259.1819114 | Yes |
| 3583 | HMDB0062550; CHEBI:82944             | 2-Methoxyacetaminophen sulfate                         | C9H11NO6S  | 260.023806  | Yes |
| 3586 | HMDB0013133                          | Methylmalonylcarnitine                                 | C11H19NO6  | 260.114731  | No  |
| 3586 | HMDB0033865; C08334                  | Lotaustralin                                           | C11H19NO6  | 260.114731  | No  |
| 3586 | HMDB0034777                          | Epidermin                                              | C11H19NO6  | 260.114731  | No  |
| 3586 | HMDB0039082                          | Camelinin                                              | C12H23NO5  | 260.114731  | No  |
| 3586 | HMDB0061717                          | Succinylcarnitine                                      | C11H19NO6  | 260.114731  | No  |
| 3586 | HMDB0062785; CHEBI:85473             | O-methylmalonyl-L-carnitine                            | C11H19NO6  | 260.114731  | No  |
| 3587 | HMDB0002248                          | Gamma glutamyl ornithine                               | C10H19N3O5 | 260.1247387 | Yes |
| 3587 | HMDB0004985                          | Aspartyllysine                                         | C10H19N3O5 | 260.1247387 | Yes |
| 3587 | HMDB0004987; CHEBI:204036            | Alpha-Aspartyl-lysine                                  | C10H19N3O5 | 260.1247387 | Yes |
| 3587 | HMDB0028758                          | Aspartyl-Lysine                                        | C10H19N3O5 | 260.1247387 | Yes |
| 3587 | HMDB0028947                          | Lysyl-Aspartate                                        | C10H19N3O5 | 260.1247387 | Yes |
| 3587 | HMDB0240241                          | Thenyldiamine                                          | C14H19N3S  | 260.1247387 | Yes |
| 3590 | HMDB0015556; C07790; CHEBI:130096    | Phenindamine                                           | C19H19N    | 260.1449388 | No  |
| 3590 | HMDB0060948; CHEBI:93101             | desmethylcyclobenzaprine                               | C19H19N    | 260.1449388 | No  |
| 3591 | HMDB0062555                          | hydroxyisovaleroyl carnitine                           | C12H23NO5  | 260.1493388 | No  |
| 3611 | HMDB0011719; CHEBI:88405             | Homovanillic acid sulfate                              | C9H10O7S   | 261.0079493 | Yes |
| 3611 | HMDB0041648                          | 2-Hydroxy-4-methoxyacetophenone 5-sulfate              | C9H10O7S   | 261.0079493 | Yes |
| 3611 | HMDB0041721                          | Dihydrocaffeic acid 3-sulfate                          | C9H10O7S   | 261.0079493 | Yes |
| 3611 | HMDB0059967; CHEBI:88716             | 3-hydroxy-3-(3-hydroxyphenyl)propanoic acid-O-sulph    | C9H10O7S   | 261.0079493 | Yes |
| 3611 | HMDB0061117                          | 3-(3,5-dihydroxyphenyl)-1-propanoic acid sulphate      | C9H10O7S   | 261.0079493 | Yes |
| 3611 | HMDB0132291                          | 2-hydroxy-3-[4-(sulfooxy)phenyl]propanoic acid         | C9H10O7S   | 261.0079493 | Yes |
| 3611 | HMDB0132292                          | 3-(4-hydroxyphenyl)-2-(sulfooxy)propanoic acid         | C9H10O7S   | 261.0079493 | Yes |
| 3611 | HMDB0134099                          | 3-[2-hydroxy-3-(sulfooxy)phenyl]propanoic acid         | C9H10O7S   | 261.0079493 | Yes |
| 3613 | HMDB0032644; C09951                  | Maclurin                                               | C13H10O6   | 261.0407137 | No  |
| 3614 | HMDB0031762                          | Carbadox                                               | C11H10N4O4 | 261.0617517 | No  |
| 3616 | HMDB0030882                          | (S)-Rutaretin                                          | C14H14O5   | 261.0757517 | Yes |

|      |                                   |                                                                     |              |             |     |
|------|-----------------------------------|---------------------------------------------------------------------|--------------|-------------|-----|
| 3616 | HMDB0032838                       | Dorsteniol                                                          | C14H14O5     | 261.0757517 | Yes |
| 3616 | HMDB0039027                       | Celereoin                                                           | C14H14O5     | 261.0757517 | Yes |
| 3616 | HMDB0128944                       | 9-hydroxy-8-(2-hydroxypropan-2-yl)-2H,8H,9H-furo[2,3-b]pyridine     | C14H14O5     | 261.0757517 | Yes |
| 3616 | HMDB0128958                       | 6-(1-hydroxy-3-oxobutyl)-7-methoxy-2H-chromen-2-one                 | C14H14O5     | 261.0757517 | Yes |
| 3616 | HMDB0128960                       | 8-hydroxy-7-methoxy-6-(3-oxobutyl)-2H-chromen-2-one                 | C14H14O5     | 261.0757517 | Yes |
| 3616 | HMDB0128961                       | 5-hydroxy-7-methoxy-6-(3-oxobutyl)-2H-chromen-2-one                 | C14H14O5     | 261.0757517 | Yes |
| 3616 | HMDB0128962                       | 6-(4-hydroxy-3-oxobutyl)-7-methoxy-2H-chromen-2-one                 | C14H14O5     | 261.0757517 | Yes |
| 3616 | HMDB0128963                       | 6-(2-hydroxy-3-oxobutyl)-7-methoxy-2H-chromen-2-one                 | C14H14O5     | 261.0757517 | Yes |
| 3616 | HMDB0131630                       | 3-hydroxy-2-(2-hydroxypropan-2-yl)-2H,3H,7H-furo[3,2-b]pyridine     | C14H14O5     | 261.0757517 | Yes |
| 3616 | HMDB0131691                       | 6-[2-(2H-1,3-benzodioxol-5-yl)ethyl]-4-hydroxy-5,6-dihydro-2H-pyran | C14H14O5     | 261.0757517 | Yes |
| 3616 | HMDB0138052                       | 9,10-dihydroxy-8,8-dimethyl-2H,8H,9H,10H-pyrano[2,3-b]pyridine      | C14H14O5     | 261.0757517 | Yes |
| 3617 | HMDB0031360                       | L-cis-Cyclo(aspartylphenylalanyl)                                   | C13H14N2O4   | 261.088181  | Yes |
| 3619 | HMDB0011177; CHEBI:356661         | Phenylalanylproline                                                 | C14H18N2O3   | 261.1245019 | Yes |
| 3619 | HMDB0011179; CHEBI:299684         | L-prolyl-L-phenylalanine                                            | C14H18N2O3   | 261.1245019 | Yes |
| 3619 | HMDB0014617; C07844; CHEBI:102216 | Methohexital                                                        | C14H18N2O3   | 261.1245019 | Yes |
| 3620 | HMDB0031897                       | Phaseolic acid                                                      | C12H22O6     | 261.1347054 | Yes |
| 3622 | HMDB0032297                       | Glyceryl 5-hydroxydecanoate                                         | C13H26O5     | 261.1709355 | No  |
| 3643 | HMDB0029944                       | Ascorbalamic acid                                                   | C9H13NO8     | 262.0581349 | No  |
| 3651 | HMDB0014488; C07408; CHEBI:8597   | Protriptyline                                                       | C19H21N      | 262.1606959 | No  |
| 3651 | HMDB0014680; C07274; CHEBI:7640   | Nortriptyline                                                       | C19H21N      | 262.1606959 | No  |
| 3651 | HMDB0060672; C16660; CHEBI:80646  | 2-Ethyl-5-methyl-3,3-diphenyl-1-pyrroline                           | C19H21N      | 262.1606959 | No  |
| 3651 | HMDB0060993                       | demethylmaprotiline                                                 | C19H21N      | 262.1606959 | No  |
| 3653 | HMDB0013892; CHEBI:261282         | N-Desmethylvenlafaxine                                              | C16H25NO2    | 262.1813825 | No  |
| 3653 | HMDB0014339; C07153; CHEBI:238661 | Tramadol                                                            | C16H25NO2    | 262.1813825 | No  |
| 3653 | HMDB0015646; CHEBI:261281         | Desvenlafaxine                                                      | C16H25NO2    | 262.1813825 | No  |
| 3653 | HMDB0029567                       | Hydroxy-alpha-sanshool                                              | C16H25NO2    | 262.1813825 | No  |
| 3653 | HMDB0060532                       | O-Desmethylvenlafaxine                                              | C16H25NO2    | 262.1813825 | No  |
| 3665 | HMDB0060005; CHEBI:89624          | Methylgallic acid-O-sulphate                                        | C8H8O8S      | 262.9865678 | Yes |
| 3665 | HMDB0128025                       | 3-hydroxy-5-methoxy-4-(sulfooxy)benzoic acid                        | C8H8O8S      | 262.9865678 | Yes |
| 3665 | HMDB0130454                       | 2-[3,5-dihydroxy-4-(sulfooxy)phenyl]acetic acid                     | C8H8O8S      | 262.9865678 | Yes |
| 3669 | HMDB0000559; CHEBI:1091015        | 3-Methoxy-4-hydroxyphenylethyleneglycol sulfate                     | C9H12O7S     | 263.023584  | No  |
| 3669 | HMDB0003332                       | 3-Methoxy-4-Hydroxyphenylglycol sulfate                             | C9H12O7S     | 263.023584  | No  |
| 3673 | HMDB0036544                       | 1''-Acetoxyeugenol acetate                                          | C14H16O5     | 263.0926781 | Yes |
| 3674 | HMDB0004259; C05642               | Acetyl-N-formyl-5-methoxykynurenamine                               | C13H16N2O4   | 263.104004  | No  |
| 3674 | HMDB0006344; C04148; CHEBI:17884  | Alpha-N-Phenylacetyl-L-glutamine                                    | C13H16N2O4   | 263.104004  | No  |
| 3674 | HMDB0061136                       | di-Hydroxymelatonin                                                 | C13H16N2O4   | 263.104004  | No  |
| 3676 | HMDB0037543                       | (±)-(Z)-2-(5-Tetradecenyl)cyclobutanone                             | C18H32O      | 263.2377257 | No  |
| 3694 | HMDB0060663; C16625               | Isoniazid alpha-ketoglutaric acid                                   | C11H11N3O5   | 264.0629312 | Yes |
| 3697 | HMDB0059732; CHEBI:89911          | 2-(2-Phenylacetoxypentyl)glycine                                    | C13H15NO5    | 264.087368  | Yes |
| 3697 | HMDB0059772                       | N-Phenylacetylglutamic acid                                         | C13H15NO5    | 264.087368  | Yes |
| 3724 | HMDB0033351; C08506; CHEBI:6841   | Methoxybrassinin                                                    | C12H14N2O5S2 | 265.0463038 | No  |
| 3724 | HMDB0040790                       | 4-Methoxybrassinin                                                  | C12H14N2O5S2 | 265.0463038 | No  |
| 3726 | HMDB0032437                       | Monoglyceride citrate                                               | C9H14O9      | 265.0575643 | Yes |
| 3726 | HMDB0125085                       | 3-oxo-3-[(3,4,5,6-tetrahydroxyoxan-2-yl)methoxy]propane             | C9H14O9      | 265.0575643 | Yes |
| 3729 | HMDB0014383; C07263; CHEBI:63613  | Nevirapine                                                          | C15H14N4O    | 265.1094428 | Yes |
| 3731 | HMDB0015027; C08090; CHEBI:217108 | Dienestrol                                                          | C18H18O2     | 265.1242045 | Yes |
| 3731 | HMDB0036387                       | 3-Phenylpropyl cinnamate                                            | C18H18O2     | 265.1242045 | Yes |
| 3734 | HMDB0001924; C13235; CHEBI:2904   | Atenolol                                                            | C14H22N2O3   | 265.1551488 | Yes |
| 3734 | HMDB0015411; C11696; CHEBI:258351 | Practolol                                                           | C14H22N2O3   | 265.1551488 | Yes |
| 3734 | HMDB0139570                       | N-(4-aminobutyl)-3-(4-hydroxy-3-methoxyphenyl)propan-1-amine        | C14H22N2O3   | 265.1551488 | Yes |
| 3735 | HMDB0033917                       | 4-Hydroxy-3-methoxy-2,10-bisaboladien-9-one                         | C16H26O3     | 265.1800579 | No  |
| 3735 | HMDB0060055; CHEBI:89569          | Tetranor 12-HETE                                                    | C16H26O3     | 265.1800579 | No  |
| 3735 | HMDB0112085                       | 3,4-Dimethyl-5-pentyl-2-furanpentanoic acid                         | C16H26O3     | 265.1800579 | No  |
| 3735 | HMDB0112088                       | 5-Hexyl-2-furanhexanoic acid                                        | C16H26O3     | 265.1800579 | No  |
| 3735 | HMDB0112089                       | 3,4-Dimethyl-5-propyl-2-furanheptanoic acid                         | C16H26O3     | 265.1800579 | No  |
| 3735 | HMDB0112092                       | 5-Pentyl-2-furanheptanoic acid                                      | C16H26O3     | 265.1800579 | No  |
| 3735 | HMDB0112097                       | 5-Butyl-2-furanoctanoic acid                                        | C16H26O3     | 265.1800579 | No  |
| 3736 | HMDB0031050                       | Methyl 2E,4Z-hexadecadienoate                                       | C17H30O2     | 265.2178304 | No  |
| 3737 | HMDB0030965; CHEBI:417823         | 9-Octadecenal                                                       | C18H34O      | 265.2536199 | No  |
| 3737 | HMDB0037517                       | 2-Tetradecylcyclobutanone                                           | C18H34O      | 265.2536199 | No  |
| 3756 | HMDB0000050; C00212; CHEBI:16335  | Adenosine                                                           | C10H13N5O4   | 266.0878176 | Yes |

|      |                                   |                                                                    |             |             |     |
|------|-----------------------------------|--------------------------------------------------------------------|-------------|-------------|-----|
| 3756 | HMDB0000085; C00330; CHEBI:17172  | Deoxyguanosine                                                     | C10H13N5O4  | 266.0878176 | Yes |
| 3756 | HMDB0000830; C06469; CHEBI:49022  | Neuraminic acid                                                    | C9H17NO8    | 266.0878176 | Yes |
| 3756 | HMDB0014340; C07195; CHEBI:45327  | Vidarabine                                                         | C10H13N5O4  | 266.0878176 | Yes |
| 3756 | HMDB0014638; C07210; CHEBI:10110  | Zidovudine                                                         | C10H13N5O4  | 266.0878176 | Yes |
| 3756 | HMDB0037842                       | N-(1-Deoxy-1-fructosyl)serine                                      | C9H17NO8    | 266.0878176 | Yes |
| 3778 | HMDB0000575; C01817; CHEBI:17485  | DL-Homocystine                                                     | C8H16N2O4S2 | 267.0485364 | Yes |
| 3778 | HMDB0000676; C01817; CHEBI:89698  | L-Homocystine                                                      | C8H16N2O4S2 | 267.0485364 | Yes |
| 3778 | HMDB0128678                       | 3-(6,7-dimethoxy-2H-1,3-benzodioxol-5-yl)oxirane-2-carboxylic acid | C12H12O7    | 267.0485364 | Yes |
| 3778 | HMDB0128681                       | (2Z)-3-(6,7-dimethoxy-2H-1,3-benzodioxol-5-yl)-2-hydroxypropane    | C12H12O7    | 267.0485364 | Yes |
| 3779 | HMDB0000195; C00294; CHEBI:17596  | Inosine                                                            | C10H12N4O5  | 267.0739435 | Yes |
| 3779 | HMDB0000481; CHEBI:74074          | Allopurinol riboside                                               | C10H12N4O5  | 267.0739435 | Yes |
| 3779 | HMDB0003040; CHEBI:705435         | Arabinosylhypoxanthine                                             | C10H12N4O5  | 267.0739435 | Yes |
| 3781 | HMDB0029051                       | Seriny-Tyrosine                                                    | C12H16N2O5  | 267.0969207 | Yes |
| 3781 | HMDB0029114                       | Tyrosyl-Serine                                                     | C12H16N2O5  | 267.0969207 | Yes |
| 3782 | HMDB0032056                       | Eugenyl benzoate                                                   | C17H16O3    | 267.1043208 | Yes |
| 3783 | HMDB0012881                       | Acetylcarnosine                                                    | C11H16N4O4  | 267.1099979 | Yes |
| 3783 | HMDB0014524; CHEBI:50223          | Dextrazoxane                                                       | C11H16N4O4  | 267.1099979 | Yes |
| 3783 | HMDB0014692; C02267               | Pentostatin                                                        | C11H16N4O4  | 267.1099979 | Yes |
| 3783 | HMDB0028865                       | Hydroxypropyl-Histidine                                            | C11H16N4O4  | 267.1099979 | Yes |
| 3783 | HMDB0028886                       | Histidiny-Hydroxyproline                                           | C11H16N4O4  | 267.1099979 | Yes |
| 3784 | HMDB0038935                       | Kamahine C                                                         | C14H20O5    | 267.1236405 | Yes |
| 3784 | HMDB0061643                       | 3-carboxy-4-methyl-5-pentyl-2-furanpropanoic acid                  | C14H20O5    | 267.1236405 | Yes |
| 3786 | HMDB0036150                       | 4,11,13,15-Tetrahydroidentin B                                     | C15H24O4    | 267.1600664 | Yes |
| 3786 | HMDB0038153                       | 1-(3-Furanyl)-6,7-dihydroxy-4,8-dimethyl-1-nonanone                | C15H24O4    | 267.1600664 | Yes |
| 3786 | HMDB0038154                       | 3,11,12-Trihydroxy-1(10)-spirovetiven-2-one                        | C15H24O4    | 267.1600664 | Yes |
| 3786 | HMDB0038165                       | Acoric acid                                                        | C15H24O4    | 267.1600664 | Yes |
| 3786 | HMDB0038503                       | Bisacurone epoxide                                                 | C15H24O4    | 267.1600664 | Yes |
| 3786 | HMDB0060570                       | Deoxydihydro-artemisinin                                           | C15H24O4    | 267.1600664 | Yes |
| 3786 | HMDB0240213                       | Prostaglandin lactone-diol                                         | C15H24O4    | 267.1600664 | Yes |
| 3788 | HMDB0030997; C12100               | Cyclohexaneundecanoic acid                                         | C17H32O2    | 267.2324672 | No  |
| 3788 | HMDB0031046; C16536               | (Z)-9-Heptadecenoic acid                                           | C17H32O2    | 267.2324672 | No  |
| 3788 | HMDB0040888                       | 2,4-Heptadecanedione                                               | C17H32O2    | 267.2324672 | No  |
| 3788 | HMDB0060038; CHEBI:75094          | 10Z-Heptadecenoic acid                                             | C17H32O2    | 267.2324672 | No  |
| 3788 | HMDB0061858                       | 7-Hexadecenoic acid, methyl ester                                  | C17H32O2    | 267.2324672 | No  |
| 3788 | HMDB0062437; CHEBI:84328          | 9Z-heptadecenoic acid                                              | C17H32O2    | 267.2324672 | No  |
| 3789 | HMDB0002384; C01838; CHEBI:17034  | Stearaldehyde                                                      | C18H36O     | 267.268957  | No  |
| 3789 | HMDB0029632                       | Oleyl alcohol                                                      | C18H36O     | 267.268957  | No  |
| 3789 | HMDB0062710; CHEBI:73504          | (9Z)-octadecen-1-ol                                                | C18H36O     | 267.268957  | No  |
| 3801 | HMDB0013852; CHEBI:53016          | Sulfamethoxazole N4-hydroxylamine                                  | C10H11N3O4S | 268.0402122 | No  |
| 3801 | HMDB0060529                       | 5-Hydroxysulfamethoxazole                                          | C10H11N3O4S | 268.0402122 | No  |
| 3801 | HMDB0060985                       | sulfamethoxazole hydroxylamine                                     | C10H11N3O4S | 268.0402122 | No  |
| 3806 | HMDB0015088; CHEBI:48273          | Rizatriptan                                                        | C15H19N5    | 268.1560981 | No  |
| 3808 | HMDB0015304; C07935; CHEBI:7789   | Orphenadrine                                                       | C18H23NO    | 268.1700241 | No  |
| 3808 | HMDB0144299                       | 3-methyl-4-(methylamino)-1,2-diphenylbutan-2-ol                    | C18H23NO    | 268.1700241 | No  |
| 3826 | HMDB0002124; C01477; CHEBI:18388  | Apigenin                                                           | C15H10O5    | 269.0466268 | Yes |
| 3826 | HMDB0003217; C06563; CHEBI:28088  | Genistein                                                          | C15H10O5    | 269.0466268 | Yes |
| 3826 | HMDB0029372; C02495; CHEBI:27479  | 2''-Hydroxydaidzein                                                | C15H10O5    | 269.0466268 | Yes |
| 3826 | HMDB0029521; C10044; CHEBI:5262   | Norizalpinin                                                       | C15H10O5    | 269.0466268 | Yes |
| 3826 | HMDB0030829; C10294; CHEBI:161756 | Aloeemodin                                                         | C15H10O5    | 269.0466268 | Yes |
| 3826 | HMDB0031715; C14314               | 6-Hydroxydaidzein                                                  | C15H10O5    | 269.0466268 | Yes |
| 3826 | HMDB0033790; C10379; CHEBI:7635   | 1,2,8-Trihydroxy-3-methylanthraquinone                             | C15H10O5    | 269.0466268 | Yes |
| 3826 | HMDB0033860                       | 8-Hydroxydaidzein                                                  | C15H10O5    | 269.0466268 | Yes |
| 3826 | HMDB0034004; C10037               | 3,4'',7-Trihydroxyflavone                                          | C15H10O5    | 269.0466268 | Yes |
| 3826 | HMDB0034409                       | Rhababrone                                                         | C15H10O5    | 269.0466268 | Yes |
| 3826 | HMDB0035214; C10343; CHEBI:42223  | Emodin                                                             | C15H10O5    | 269.0466268 | Yes |
| 3826 | HMDB0039449                       | Rheinanthrone                                                      | C15H10O5    | 269.0466268 | Yes |
| 3826 | HMDB0041655; C14313; CHEBI:50399  | 3''-Hydroxydaidzein                                                | C15H10O5    | 269.0466268 | Yes |
| 3826 | HMDB0126019                       | 5,7-dihydroxy-2-(3-hydroxyphenyl)-4H-chromen-4-one                 | C15H10O5    | 269.0466268 | Yes |
| 3826 | HMDB0129338                       | 5,7-dihydroxy-3-(3-hydroxyphenyl)-4H-chromen-4-one                 | C15H10O5    | 269.0466268 | Yes |
| 3826 | HMDB0129963                       | 5,6,7-trihydroxy-3-phenyl-4H-chromen-4-one                         | C15H10O5    | 269.0466268 | Yes |
| 3826 | HMDB0130170                       | 5,7,8-trihydroxy-2-phenyl-4H-chromen-4-one                         | C15H10O5    | 269.0466268 | Yes |

|      |                                  |                                                       |            |             |     |
|------|----------------------------------|-------------------------------------------------------|------------|-------------|-----|
| 3826 | HMDB0130780                      | 5,7-dihydroxy-3-(2-hydroxyphenyl)-4H-chromen-4-one    | C15H10O5   | 269.0466268 | Yes |
| 3826 | HMDB0132880                      | 6,7,8-trihydroxy-3-phenyl-4H-chromen-4-one            | C15H10O5   | 269.0466268 | Yes |
| 3826 | HMDB0132951                      | [4-(4-methyl-3-oxopent-1-en-1-yl)phenyl]oxidanesulfo  | C12H14O5S  | 269.0466268 | Yes |
| 3826 | HMDB0133311                      | 2-(3,4-dihydroxyphenyl)-7-hydroxy-4H-chromen-4-one    | C15H10O5   | 269.0466268 | Yes |
| 3826 | HMDB0133316                      | 6,7-dihydroxy-2-(3-hydroxyphenyl)-4H-chromen-4-one    | C15H10O5   | 269.0466268 | Yes |
| 3826 | HMDB0133990                      | 6,7-dihydroxy-3-(3-hydroxyphenyl)-4H-chromen-4-one    | C15H10O5   | 269.0466268 | Yes |
| 3826 | HMDB0134890                      | 5,6,7-trihydroxy-2-phenyl-4H-chromen-4-one            | C15H10O5   | 269.0466268 | Yes |
| 3826 | HMDB0137513                      | 5,6-dihydroxy-2-[(4-hydroxyphenyl)methylidene]-2,3-c  | C15H10O5   | 269.0466268 | Yes |
| 3826 | HMDB0137514                      | 6,7-dihydroxy-2-[(4-hydroxyphenyl)methylidene]-2,3-c  | C15H10O5   | 269.0466268 | Yes |
| 3826 | HMDB0137515                      | 4,6-dihydroxy-2-[(4-hydroxyphenyl)methylidene]-2,3-c  | C15H10O5   | 269.0466268 | Yes |
| 3826 | HMDB0137516                      | 2-[(3,4-dihydroxyphenyl)methylidene]-6-hydroxy-2,3-c  | C15H10O5   | 269.0466268 | Yes |
| 3826 | HMDB0137517                      | 2-[(2,4-dihydroxyphenyl)methylidene]-6-hydroxy-2,3-c  | C15H10O5   | 269.0466268 | Yes |
| 3826 | HMDB0140468                      | 2-(3,4,5-trihydroxyphenyl)-4H-chromen-4-one           | C15H10O5   | 269.0466268 | Yes |
| 3827 | HMDB0059806                      | Phenylglucuronide                                     | C12H14O7   | 269.0670278 | Yes |
| 3827 | HMDB0060014; CHEBI:64681         | Phenol glucuronide                                    | C12H14O7   | 269.0670278 | Yes |
| 3827 | HMDB0135168                      | 3,4,5-trihydroxy-6-phenoxyoxane-2-carboxylic acid     | C12H14O7   | 269.0670278 | Yes |
| 3829 | HMDB0028755                      | Aspartyl-Histidine                                    | C10H14N4O5 | 269.0888369 | No  |
| 3829 | HMDB0028881                      | Histidiny-Aspartate                                   | C10H14N4O5 | 269.0888369 | No  |
| 3829 | HMDB0029955                      | D-erythro-L-galacto-Nonulose                          | C9H18O9    | 269.0888369 | No  |
| 3836 | HMDB0010733; CHEBI:37251         | 3-Oxohexadecanoic acid                                | C16H30O3   | 269.2124171 | No  |
| 3836 | HMDB0030972                      | 8-Oxohexadecanoic acid                                | C16H30O3   | 269.2124171 | No  |
| 3836 | HMDB0030973                      | 9-Oxohexadecanoic acid                                | C16H30O3   | 269.2124171 | No  |
| 3836 | HMDB0030978                      | 11-Oxohexadecanoic acid                               | C16H30O3   | 269.2124171 | No  |
| 3837 | HMDB0002259; CHEBI:32365         | Heptadecanoic acid                                    | C17H34O2   | 269.2484881 | No  |
| 3837 | HMDB0031067; CHEBI:84874         | (S)-14-Methylhexadecanoic acid                        | C17H34O2   | 269.2484881 | No  |
| 3837 | HMDB0034131                      | Nonyl octanoate                                       | C17H34O2   | 269.2484881 | No  |
| 3837 | HMDB0037372; CHEBI:87343         | 3-Methylbutyl dodecanoate                             | C17H34O2   | 269.2484881 | No  |
| 3837 | HMDB0040392                      | Isopropyl tetradecanoate                              | C17H34O2   | 269.2484881 | No  |
| 3837 | HMDB0040598                      | (±)-11-Methylhexadecanoic acid                        | C17H34O2   | 269.2484881 | No  |
| 3837 | HMDB0059870                      | Ethyl pentadecanoate                                  | C17H34O2   | 269.2484881 | No  |
| 3837 | HMDB0061859; C16995              | Methyl hexadecanoic acid                              | C17H34O2   | 269.2484881 | No  |
| 3855 | HMDB0011654; C04692; CHEBI:16475 | 2-(3-Carboxy-3-(methylammonio)propyl)-L-histidine     | C11H19N4O4 | 270.1348002 | No  |
| 3859 | HMDB0001920; C06947; CHEBI:4470  | Dextromethorphan                                      | C18H25NO   | 270.1859492 | No  |
| 3860 | HMDB0013317; CHEBI:74437         | Tridecanoylglycine                                    | C15H29NO3  | 270.2078076 | No  |
| 3879 | HMDB0128634                      | [(7-hydroxy-1-oxo-1H-isochromen-3-yl)methoxy]sulfor   | C10H8O7S   | 270.9920928 | Yes |
| 3879 | HMDB0128636                      | [(6-hydroxy-1-oxo-1H-isochromen-3-yl)methoxy]sulfor   | C10H8O7S   | 270.9920928 | Yes |
| 3879 | HMDB0128638                      | [(5-hydroxy-1-oxo-1H-isochromen-3-yl)methoxy]sulfor   | C10H8O7S   | 270.9920928 | Yes |
| 3880 | HMDB0059993; CHEBI:88750         | 5-(Hydroxyphenyl)-gamma-valerolactone-O-sulphate      | C11H12O6S  | 271.0285929 | Yes |
| 3880 | HMDB0126424                      | [(5-hydroxy-2-methyl-2H-chromen-2-yl)methoxy]sulfo    | C11H12O6S  | 271.0285929 | Yes |
| 3880 | HMDB0129400                      | [1-(4-methoxy-1-benzofuran-5-yl)ethoxy]sulfonic acid  | C11H12O6S  | 271.0285929 | Yes |
| 3880 | HMDB0135674                      | [2-methoxy-3-(3-oxobut-1-en-1-yl)phenyl]oxidanesulfo  | C11H12O6S  | 271.0285929 | Yes |
| 3881 | HMDB0002670; C00509; CHEBI:17846 | Naringenin                                            | C15H12O5   | 271.0615479 | Yes |
| 3881 | HMDB0005897; C14458              | Dihydrogenistein                                      | C15H12O5   | 271.0615479 | Yes |
| 3881 | HMDB0029631; C06561; CHEBI:15413 | Chalconaringenin                                      | C15H12O5   | 271.0615479 | Yes |
| 3881 | HMDB0030873                      | 1-Hydroxy-3,7-dimethoxyxanthone                       | C15H12O5   | 271.0615479 | Yes |
| 3881 | HMDB0031824                      | 4'',5,8-Trihydroxyflavanone                           | C15H12O5   | 271.0615479 | Yes |
| 3881 | HMDB0033308                      | Moracin J                                             | C15H12O5   | 271.0615479 | Yes |
| 3881 | HMDB0033928; C03567; CHEBI:16035 | (±)-2''-Hydroxydihydrodaidzein                        | C15H12O5   | 271.0615479 | Yes |
| 3881 | HMDB0034002                      | 3,4,9-Trihydroxypterocarpan                           | C15H12O5   | 271.0615479 | Yes |
| 3881 | HMDB0034105; C01263; CHEBI:15649 | Glycinol                                              | C15H12O5   | 271.0615479 | Yes |
| 3881 | HMDB0037254; C09751              | (2R,3R)-3,4'',7-Trihydroxyflavanone                   | C15H12O5   | 271.0615479 | Yes |
| 3881 | HMDB0038549; C17673; CHEBI:78029 | Toralactone                                           | C15H12O5   | 271.0615479 | Yes |
| 3881 | HMDB0041656                      | 3''-Hydroxydihydrodaidzein                            | C15H12O5   | 271.0615479 | Yes |
| 3881 | HMDB0041698                      | 6-Hydroxydihydrodaidzein                              | C15H12O5   | 271.0615479 | Yes |
| 3881 | HMDB0041704                      | 8-Hydroxydihydrodaidzein                              | C15H12O5   | 271.0615479 | Yes |
| 3881 | HMDB0125364                      | 3,5,7-trihydroxy-2-phenyl-3,4-dihydro-2H-1-benzopyra  | C15H12O5   | 271.0615479 | Yes |
| 3881 | HMDB0125365                      | 3-phenyl-1-(2,4,6-trihydroxyphenyl)propane-1,2-dione  | C15H12O5   | 271.0615479 | Yes |
| 3881 | HMDB0126021                      | 5,7-dihydroxy-2-(3-hydroxyphenyl)-3,4-dihydro-2H-1-b  | C15H12O5   | 271.0615479 | Yes |
| 3881 | HMDB0126022                      | 3-(3-hydroxyphenyl)-1-(2,4,6-trihydroxyphenyl)prop-2- | C15H12O5   | 271.0615479 | Yes |
| 3881 | HMDB0128074                      | 5,7-dihydroxy-2-(4-hydroxyphenyl)-3,4-dihydro-2H-1-b  | C15H12O5   | 271.0615479 | Yes |
| 3881 | HMDB0128075                      | 3-(4-hydroxyphenyl)-1-(2,4,6-trihydroxyphenyl)prop-2- | C15H12O5   | 271.0615479 | Yes |

|      |                                  |                                                                                                   |             |             |     |
|------|----------------------------------|---------------------------------------------------------------------------------------------------|-------------|-------------|-----|
| 3881 | HMDB0129341                      | 5,7-dihydroxy-3-(3-hydroxyphenyl)-3,4-dihydro-2H-1-b                                              | C15H12O5    | 271.0615479 | Yes |
| 3881 | HMDB0129965                      | 5,6,7-trihydroxy-3-phenyl-3,4-dihydro-2H-1-benzopyra                                              | C15H12O5    | 271.0615479 | Yes |
| 3881 | HMDB0130173                      | 5,7,8-trihydroxy-2-phenyl-3,4-dihydro-2H-1-benzopyra                                              | C15H12O5    | 271.0615479 | Yes |
| 3881 | HMDB0130182                      | 3-phenyl-1-(2,3,4,6-tetrahydroxyphenyl)prop-2-en-1-o                                              | C15H12O5    | 271.0615479 | Yes |
| 3881 | HMDB0133545                      | 2-benzyl-2,4,6-trihydroxy-2,3-dihydro-1-benzofuran-3-                                             | C15H12O5    | 271.0615479 | Yes |
| 3881 | HMDB0133993                      | 6,7-dihydroxy-3-(3-hydroxyphenyl)-3,4-dihydro-2H-1-b                                              | C15H12O5    | 271.0615479 | Yes |
| 3881 | HMDB0133999                      | 6,7,8-trihydroxy-3-phenyl-3,4-dihydro-2H-1-benzopyra                                              | C15H12O5    | 271.0615479 | Yes |
| 3881 | HMDB0134891                      | 5,6,7-trihydroxy-2-phenyl-3,4-dihydro-2H-1-benzopyra                                              | C15H12O5    | 271.0615479 | Yes |
| 3881 | HMDB0134892                      | (2E)-3-phenyl-1-(2,3,4,6-tetrahydroxyphenyl)prop-2-er                                             | C15H12O5    | 271.0615479 | Yes |
| 3881 | HMDB0137525                      | 6,7-dihydroxy-2-[(4-hydroxyphenyl)methyl]-2,3-dihydr                                              | C15H12O5    | 271.0615479 | Yes |
| 3881 | HMDB0137528                      | 4,6-dihydroxy-2-[(4-hydroxyphenyl)methyl]-2,3-dihydr                                              | C15H12O5    | 271.0615479 | Yes |
| 3881 | HMDB0137531                      | 2-[(3,4-dihydroxyphenyl)methyl]-6-hydroxy-2,3-dihydr                                              | C15H12O5    | 271.0615479 | Yes |
| 3881 | HMDB0138088                      | 8,17-dioxatetracyclo[8.7.0.0.0 <sup>2</sup> ,2.0 <sup>11</sup> ,1 <sup>1</sup> ]heptadeca-2(7),3, | C15H12O5    | 271.0615479 | Yes |
| 3881 | HMDB0138618                      | 5-(6-hydroxy-5-methoxy-1-benzofuran-2-yl)benzene-1,                                               | C15H12O5    | 271.0615479 | Yes |
| 3883 | HMDB0029943; C06186; CHEBI:18305 | Arbutin                                                                                           | C12H16O7    | 271.0823895 | Yes |
| 3884 | HMDB0014632; C07309; CHEBI:63622 | Sotalol                                                                                           | C12H20N2O3S | 271.11245   | Yes |
| 3884 | HMDB0060341; CHEBI:82517         | 1a,11b-Dihydro-4,9-dimethylbenz[a]anthra[3,4-b]oxire                                              | C20H16O     | 271.11245   | Yes |
| 3884 | HMDB0060419                      | 7-Hydroxymethyl-12-methylbenz[a]anthracene                                                        | C20H16O     | 271.11245   | Yes |
| 3884 | HMDB0060422; CHEBI:82590         | 7,12-Dimethylbenz[a]anthracene 5,6-oxide                                                          | C20H16O     | 271.11245   | Yes |
| 3888 | HMDB0035918                      | 7(14)-Bisabolene-2,3,10,11-tetrol                                                                 | C15H28O4    | 271.1910848 | Yes |
| 3889 | HMDB0010734; CHEBI:38247         | (R)-3-Hydroxy-hexadecanoic acid                                                                   | C16H32O3    | 271.2280483 | No  |
| 3889 | HMDB0031057; CHEBI:65101         | (R)-2-Hydroxyhexadecanoic acid                                                                    | C16H32O3    | 271.2280483 | No  |
| 3889 | HMDB0061658; CHEBI:37248         | 3-hydroxyhexadecanoic acid                                                                        | C16H32O3    | 271.2280483 | No  |
| 3889 | HMDB0112184                      | 5-Hydroxyhexadecanoic acid                                                                        | C16H32O3    | 271.2280483 | No  |
| 3889 | HMDB0112185                      | 7-Hydroxyhexadecanoic acid                                                                        | C16H32O3    | 271.2280483 | No  |
| 3889 | HMDB0112186                      | 8-Hydroxyhexadecanoic acid                                                                        | C16H32O3    | 271.2280483 | No  |
| 3889 | HMDB0112187                      | 9-Hydroxyhexadecanoic acid                                                                        | C16H32O3    | 271.2280483 | No  |
| 3889 | HMDB0112188                      | 10-Hydroxyhexadecanoic acid                                                                       | C16H32O3    | 271.2280483 | No  |
| 3889 | HMDB0112189                      | 11-Hydroxyhexadecanoic acid                                                                       | C16H32O3    | 271.2280483 | No  |
| 3889 | HMDB0112190                      | 12-Hydroxyhexadecanoic acid                                                                       | C16H32O3    | 271.2280483 | No  |
| 3889 | HMDB0112191                      | 13-Hydroxyhexadecanoic acid                                                                       | C16H32O3    | 271.2280483 | No  |
| 3889 | HMDB0112192                      | 6-Hydroxyhexadecanoic acid                                                                        | C16H32O3    | 271.2280483 | No  |
| 3901 | HMDB0062800; CHEBI:58759         | 6-phosphonatooxy-D-gluconate                                                                      | C6H10O10P   | 271.9939305 | Yes |
| 3902 | HMDB0015492                      | Stepronin                                                                                         | C10H11NO4S2 | 272.0044604 | No  |
| 3906 | HMDB0014468; C07949; CHEBI:63630 | Tolcapone                                                                                         | C14H11NO5   | 272.0546661 | Yes |
| 3909 | HMDB0000667; CHEBI:30662         | L-Thyronine                                                                                       | C15H15NO4   | 272.0900062 | No  |
| 3909 | HMDB0062356; CHEBI:30661         | 3''-monoiodo-L-thyronine                                                                          | C15H15NO4   | 272.0900062 | No  |
| 3912 | HMDB0030187; CHEBI:520668        | (E,E)-Piperlonguminine                                                                            | C16H19NO3   | 272.1295715 | No  |
| 3912 | HMDB0038834                      | (2E)-Piperamide-C5:1                                                                              | C16H19NO3   | 272.1295715 | No  |
| 3916 | HMDB0013238; CHEBI:74303         | Heptanoylcarnitine                                                                                | C14H27NO4   | 272.1865508 | No  |
| 3918 | HMDB0031184                      | N-Isobutyl-2,4,8,10,12-tetradecapentaenamide                                                      | C18H27NO    | 272.2022429 | No  |
| 3940 | HMDB0029200; CHEBI:133508        | Ferulic acid 4-sulfate                                                                            | C10H10O7S   | 273.0078497 | No  |
| 3940 | HMDB0041748                      | Isoferulic acid 3-sulfate                                                                         | C10H10O7S   | 273.0078497 | No  |
| 3940 | HMDB0127955                      | 3-[3-methoxy-4-(sulfooxy)phenyl]prop-2-enoic acid                                                 | C10H10O7S   | 273.0078497 | No  |
| 3940 | HMDB0131141                      | 3-[4-methoxy-3-(sulfooxy)phenyl]prop-2-enoic acid                                                 | C10H10O7S   | 273.0078497 | No  |
| 3943 | HMDB0059981; CHEBI:88703         | 4-Hydroxy-5-(phenyl)-valeric acid-O-sulphate                                                      | C11H14O6S   | 273.0444891 | Yes |
| 3943 | HMDB0126242                      | {[4-(2,6-dihydroxyphenyl)-2-methylbut-2-en-1-yl]oxy}s                                             | C11H14O6S   | 273.0444891 | Yes |
| 3943 | HMDB0126373                      | {[(2E)-4-(2,6-dihydroxyphenyl)-2-methylbut-2-en-1-yl]c                                            | C11H14O6S   | 273.0444891 | Yes |
| 3943 | HMDB0133253                      | {[(2E)-4-(2,4-dihydroxyphenyl)-2-methylbut-2-en-1-yl]c                                            | C11H14O6S   | 273.0444891 | Yes |
| 3943 | HMDB0133255                      | {[4-(2,4-dihydroxyphenyl)-2-methylbut-2-en-1-yl]oxy}s                                             | C11H14O6S   | 273.0444891 | Yes |
| 3943 | HMDB0133259                      | [2,6-dihydroxy-3-(3-methylbut-2-en-1-yl)phenyl]oxidar                                             | C11H14O6S   | 273.0444891 | Yes |
| 3943 | HMDB0135676                      | [2-methoxy-4-(3-oxobutyl)phenyl]oxidanesulfonic acid                                              | C11H14O6S   | 273.0444891 | Yes |
| 3943 | HMDB0135698                      | [4-(3-hydroxybut-1-en-1-yl)-2-methoxyphenyl]oxidane                                               | C11H14O6S   | 273.0444891 | Yes |
| 3943 | HMDB0135699                      | {[4-(4-hydroxy-3-methoxyphenyl)but-3-en-2-yl]oxy}sul                                              | C11H14O6S   | 273.0444891 | Yes |
| 3944 | HMDB0013870; CHEBI:212535        | cis,trans-5''-Hydroxythalidomide                                                                  | C13H10N2O5  | 273.0538891 | Yes |
| 3944 | HMDB0013871; CHEBI:405332        | 5-Hydroxythalidomide                                                                              | C13H10N2O5  | 273.0538891 | Yes |
| 3944 | HMDB0013872                      | Thalidomide arene oxide                                                                           | C13H10N2O5  | 273.0538891 | Yes |
| 3944 | HMDB0041120                      | 4-Phenyl-1H,3H-naphtho[1,8-cd]pyran-1,3-dione                                                     | C18H10O3    | 273.0538891 | Yes |
| 3945 | HMDB0133010                      | {[1-(4-methoxyphenyl)pentan-3-yl]oxy}sulfonic acid                                                | C12H18O5S   | 273.0805836 | No  |
| 3946 | HMDB0032173                      | Bakers yeast extract                                                                              | C19H14O2    | 273.0931793 | Yes |
| 3948 | HMDB0028950                      | Lysyl-Glutamate                                                                                   | C11H20N3O5  | 273.1338794 | Yes |



|      |                                       |                                                        |             |             |     |
|------|---------------------------------------|--------------------------------------------------------|-------------|-------------|-----|
| 3950 | HMDB0000394                           | 3-Hydroxytetradecanedioic acid                         | C14H26O5    | 273.171044  | No  |
| 3953 | HMDB0014441; C07532; CHEBI:8890       | Ropivacaine                                            | C17H26N2O   | 273.196513  | No  |
| 3953 | HMDB0037992                           | Cyanidin 3-(diferuloylsophoroside) 5-glucoside         | C17H26N2O   | 273.196513  | No  |
| 3954 | HMDB0072858                           | MG(0:0/i-12:0/0:0)                                     | C15H30O4    | 273.2062264 | No  |
| 3954 | HMDB0072860                           | MG(i-12:0/0:0/0:0)                                     | C15H30O4    | 273.2062264 | No  |
| 3954 | HMDB0072863                           | MG(12:0/0:0/0:0)                                       | C15H30O4    | 273.2062264 | No  |
| 3954 | HMDB0072869                           | MG(0:0/12:0/0:0)                                       | C15H30O4    | 273.2062264 | No  |
| 3975 | HMDB0001786                           | Ethenodeoxyadenosine                                   | C12H13N5O3  | 274.0939123 | No  |
| 3975 | HMDB0030697; C08340                   | Sarmentosin                                            | C11H17NO7   | 274.0939123 | No  |
| 3977 | HMDB0041488                           | 4,5-Dihydropiperlonguminine                            | C16H21NO3   | 274.1441473 | No  |
| 3977 | HMDB0060989                           | 4''-hydroxypropanolol                                  | C16H21NO3   | 274.1441473 | No  |
| 3992 | HMDB0041724                           | Dihydroferulic acid 4-sulfate                          | C10H12O7S   | 275.0228436 | Yes |
| 3992 | HMDB0131144                           | 3-[4-methoxy-3-(sulfooxy)phenyl]propanoic acid         | C10H12O7S   | 275.0228436 | Yes |
| 3996 | HMDB0033649; CHEBI:133763             | O-DemethylfONSECIN                                     | C14H12O6    | 275.0573853 | Yes |
| 3996 | HMDB0135717                           | [4-(3-hydroxybutyl)-2-methoxyphenyl]oxidanesulfonic    | C11H16O6S   | 275.0573853 | Yes |
| 3996 | HMDB0135718                           | {[4-(4-hydroxy-3-methoxyphenyl)butan-2-yl]oxy}sulfon   | C11H16O6S   | 275.0573853 | Yes |
| 3999 | HMDB0030764                           | Acetylpteriosin C                                      | C16H20O4    | 275.1291298 | Yes |
| 4000 | HMDB0015586; CHEBI:3988               | Cyclandelate                                           | C17H24O3    | 275.1647156 | No  |
| 4000 | HMDB0031463; C10494                   | [8]-Shogaol                                            | C17H24O3    | 275.1647156 | No  |
| 4000 | HMDB0038938                           | Panaquinquecol 2                                       | C17H24O3    | 275.1647156 | No  |
| 4000 | HMDB0038994                           | Ginsenyne C                                            | C17H24O3    | 275.1647156 | No  |
| 4000 | HMDB0040375                           | Ginsenyne K                                            | C17H24O3    | 275.1647156 | No  |
| 4000 | HMDB0041201                           | Panaquinquecol 7                                       | C17H24O3    | 275.1647156 | No  |
| 4000 | HMDB0137236                           | (4E)-1-(4-hydroxy-3-methoxyphenyl)dec-4-en-3-one       | C17H24O3    | 275.1647156 | No  |
| 4000 | HMDB0137237                           | (1E)-1-(4-hydroxy-3-methoxyphenyl)dec-1-en-3-one       | C17H24O3    | 275.1647156 | No  |
| 4001 | HMDB0015555; C07230; CHEBI:103799     | Molindone                                              | C16H24N2O2  | 275.1764175 | No  |
| 4001 | HMDB0061010                           | Noralfentanil                                          | C16H24N2O2  | 275.1764175 | No  |
| 4003 | HMDB0002697; CHEBI:36412              | 19-Norandrosterone                                     | C18H28O2    | 275.2021822 | No  |
| 4003 | HMDB0004590; CHEBI:529214             | 19-Nor-5-androstenediol                                | C18H28O2    | 275.2021822 | No  |
| 4003 | HMDB0005886; CHEBI:36412              | 19-Noretiocholanolone                                  | C18H28O2    | 275.2021822 | No  |
| 4003 | HMDB0006547; C16300; CHEBI:32389      | Stearidonic acid                                       | C18H28O2    | 275.2021822 | No  |
| 4003 | HMDB0032464                           | Phenethyl decanoate                                    | C18H28O2    | 275.2021822 | No  |
| 4003 | HMDB0032672                           | 4,8,12,15-Octadecatetraenoic acid                      | C18H28O2    | 275.2021822 | No  |
| 4003 | HMDB0034382                           | (E,E)-11,13-Octadecadien-9-ynoic acid                  | C18H28O2    | 275.2021822 | No  |
| 4003 | HMDB0062677; CHEBI:87333              | 17beta-hydroxy-5beta-estran-3-one                      | C18H28O2    | 275.2021822 | No  |
| 4018 | HMDB0001495; C01449; CHEBI:17433      | Queuine                                                | C12H15N5O3  | 276.1097584 | Yes |
| 4018 | HMDB0006868; C04424; CHEBI:17577      | S-(2-Methylpropionyl)-dihydrolipoamide-E               | C12H23NO2S2 | 276.1097584 | Yes |
| 4018 | HMDB0014585; CHEBI:473990             | Entecavir                                              | C12H15N5O3  | 276.1097584 | Yes |
| 4018 | HMDB0038493                           | N-(1-Deoxy-1-fructosyl)proline                         | C11H19NO7   | 276.1097584 | Yes |
| 4020 | HMDB0036325                           | Dinorcapsaicin                                         | C16H23NO3   | 276.1609993 | No  |
| 4021 | HMDB0041944; CHEBI:60728              | N-Acetylprocainamide                                   | C15H23N3O2  | 276.1722325 | No  |
| 4037 | HMDB0124971                           | 2-hydroxy-3-[4-hydroxy-3-(sulfooxy)phenyl]propanoic    | C9H10O8S    | 277.0009085 | Yes |
| 4037 | HMDB0124972                           | 3-(3,4-dihydroxyphenyl)-2-(sulfooxy)propanoic acid     | C9H10O8S    | 277.0009085 | Yes |
| 4037 | HMDB0128014                           | 3-[3,5-dihydroxy-4-(sulfooxy)phenyl]propanoic acid     | C9H10O8S    | 277.0009085 | Yes |
| 4037 | HMDB0131461                           | 3,5-dimethoxy-4-(sulfooxy)benzoic acid                 | C9H10O8S    | 277.0009085 | Yes |
| 4038 | HMDB0033209; C14420; CHEBI:34761      | Fenthion                                               | C10H15O3PS2 | 277.0119708 | No  |
| 4042 | HMDB0015522; C19530; CHEBI:102265     | Sulfamethazine                                         | C12H14N4O2S | 277.0754847 | Yes |
| 4043 | HMDB0028825; CHEBI:73507              | Glutamylmethionine                                     | C10H18N2O5S | 277.0842682 | No  |
| 4043 | HMDB0034367; HMDB0029155; CHEBI:82961 | gamma-Glutamylmethionine                               | C10H18N2O5S | 277.0842682 | No  |
| 4044 | HMDB0002091                           | Isovalerylglucuronide                                  | C11H18O8    | 277.0926217 | Yes |
| 4044 | HMDB0126546                           | 3,4,5-trihydroxy-6-[(oxolan-2-yl)methoxy]oxane-2-carb  | C11H18O8    | 277.0926217 | Yes |
| 4044 | HMDB0130798                           | 3,4,5-trihydroxy-6-[(3-methylbutanoyl)oxy]oxane-2-carb | C11H18O8    | 277.0926217 | Yes |
| 4045 | HMDB0030766                           | 11-Hydroxy-12-methoxydihydrokawain                     | C15H18O5    | 277.1084915 | No  |
| 4045 | HMDB0033262                           | Solanolone                                             | C15H18O5    | 277.1084915 | No  |
| 4045 | HMDB0036049                           | Marasmone                                              | C15H18O5    | 277.1084915 | No  |
| 4045 | HMDB0036052                           | Isomarasmane                                           | C15H18O5    | 277.1084915 | No  |
| 4045 | HMDB0036662                           | 2beta,9xi-Dihydroxy-8-oxo-1(10),4,11(13)-germacatrien  | C15H18O5    | 277.1084915 | No  |
| 4045 | HMDB0037325                           | Achimilic acid                                         | C15H18O5    | 277.1084915 | No  |
| 4045 | HMDB0131686                           | 6-[2-(2H-1,3-benzodioxol-5-yl)ethyl]-4-methoxyoxan-2   | C15H18O5    | 277.1084915 | No  |
| 4046 | HMDB0011112; C05775; CHEBI:10329      | N1-(alpha-D-riboseyl)-5,6-dimethyl-benzimidazole       | C14H18N2O4  | 277.1184915 | No  |
| 4046 | HMDB0011176                           | L-phenylalanyl-L-hydroxyproline                        | C14H18N2O4  | 277.1184915 | No  |

|      |                                   |                                                                                       |            |             |     |
|------|-----------------------------------|---------------------------------------------------------------------------------------|------------|-------------|-----|
| 4046 | HMDB0028996                       | Phenylalanyl-Hydroxyproline                                                           | C14H18N2O4 | 277.1184915 | No  |
| 4046 | HMDB0029029                       | Prolyl-Tyrosine                                                                       | C14H18N2O4 | 277.1184915 | No  |
| 4046 | HMDB0029113                       | Tyrosyl-Proline                                                                       | C14H18N2O4 | 277.1184915 | No  |
| 4048 | HMDB0001518; CHEBI:626842         | Alpha-CEHC                                                                            | C16H22O4   | 277.1439528 | Yes |
| 4048 | HMDB0013248; C03343; CHEBI:17243  | Monoethylhexyl phthalic acid                                                          | C16H22O4   | 277.1439528 | Yes |
| 4048 | HMDB0013835; C15205; CHEBI:894546 | Diisobutyl phthalate                                                                  | C16H22O4   | 277.1439528 | Yes |
| 4048 | HMDB0033244; C14214; CHEBI:535597 | Dibutyl phthalate                                                                     | C16H22O4   | 277.1439528 | Yes |
| 4048 | HMDB0133045                       | 2-(4-hydroxy-3-methylbut-2-en-1-yl)-4-(3-methylbut-2                                  | C16H22O4   | 277.1439528 | Yes |
| 4048 | HMDB0133047                       | bis(3-methylbut-2-en-1-yl)benzene-1,2,3,5-tetrol                                      | C16H22O4   | 277.1439528 | Yes |
| 4048 | HMDB0133048                       | 2-[(3,3-dimethyloxiran-2-yl)methyl]-4-(3-methylbut-2- $\epsilon$                      | C16H22O4   | 277.1439528 | Yes |
| 4048 | HMDB0133084                       | 4-(3,7-dimethylocta-2,6-dien-1-yl)benzene-1,2,3,5-tetr                                | C16H22O4   | 277.1439528 | Yes |
| 4048 | HMDB0133085                       | 2-[[3-methyl-3-(4-methylpent-3-en-1-yl)oxiran-2-yl]me                                 | C16H22O4   | 277.1439528 | Yes |
| 4048 | HMDB0133086                       | 2-[5-(3,3-dimethyloxiran-2-yl)-3-methylpent-2-en-1-yl]                                | C16H22O4   | 277.1439528 | Yes |
| 4048 | HMDB0133087                       | 2-[(2Z)-4-hydroxy-3-(4-methylpent-3-en-1-yl)but-2-en-                                 | C16H22O4   | 277.1439528 | Yes |
| 4048 | HMDB0133088                       | 2-(4-hydroxy-3,7-dimethylocta-2,6-dien-1-yl)benzene-:                                 | C16H22O4   | 277.1439528 | Yes |
| 4048 | HMDB0133089                       | 2-(5-hydroxy-3,7-dimethylocta-2,6-dien-1-yl)benzene-:                                 | C16H22O4   | 277.1439528 | Yes |
| 4048 | HMDB0133090                       | 2-[(6E)-8-hydroxy-3,7-dimethylocta-2,6-dien-1-yl]benz                                 | C16H22O4   | 277.1439528 | Yes |
| 4048 | HMDB0133091                       | 2-(8-hydroxy-3,7-dimethylocta-2,6-dien-1-yl)benzene-:                                 | C16H22O4   | 277.1439528 | Yes |
| 4049 | HMDB0013243; C11221; CHEBI:383437 | Leucyl-phenylalanine                                                                  | C15H22N2O3 | 277.1561516 | No  |
| 4049 | HMDB0028914                       | Isoleucyl-Phenylalanine                                                               | C15H22N2O3 | 277.1561516 | No  |
| 4049 | HMDB0028998                       | Phenylalanyl-Isoleucine                                                               | C15H22N2O3 | 277.1561516 | No  |
| 4049 | HMDB0062483; CHEBI:111173         | keratan sulfate I                                                                     | C15H22N2O3 | 277.1561516 | No  |
| 4050 | HMDB0035028                       | (x)-2-Heptanol glucoside                                                              | C13H26O6   | 277.1647743 | No  |
| 4051 | HMDB0014571; CHEBI:165539         | Triprolidine                                                                          | C19H22N2   | 277.1707516 | No  |
| 4053 | HMDB0060931                       | 2-ethyl-1,5-dimethyl-3,3-diphenylpyrrolinium (EDDP)                                   | C20H24N    | 277.1845473 | No  |
| 4054 | HMDB0001388; C06427; CHEBI:27432  | Alpha-Linolenic acid                                                                  | C18H30O2   | 277.2173802 | No  |
| 4054 | HMDB0003073; C06426; CHEBI:28661  | Gamma-Linolenic acid                                                                  | C18H30O2   | 277.2173802 | No  |
| 4054 | HMDB0030962; CHEBI:86148          | Calendic acid                                                                         | C18H30O2   | 277.2173802 | No  |
| 4054 | HMDB0030963; C08364; CHEBI:38383  | Punicic acid                                                                          | C18H30O2   | 277.2173802 | No  |
| 4054 | HMDB0030964                       | Linolenelaidic acid                                                                   | C18H30O2   | 277.2173802 | No  |
| 4070 | HMDB0032807                       | Niazirin                                                                              | C14H17NO5  | 278.1051245 | No  |
| 4075 | HMDB0013889                       | E-10-Hydroxynortriptyline                                                             | C19H21NO   | 278.1542806 | No  |
| 4075 | HMDB0015273; C06971; CHEBI:36691  | Doxepin                                                                               | C19H21NO   | 278.1542806 | No  |
| 4077 | HMDB0036326                       | N-[(4-Hydroxy-3-methoxyphenyl)methyl]octanamide                                       | C16H25NO3  | 278.1764402 | No  |
| 4097 | HMDB0126113                       | 6-(1-carboxy-1-methylethoxy)-3,4,5-trihydroxyoxane-2                                  | C10H16O9   | 279.0703938 | Yes |
| 4097 | HMDB0126114                       | 3,4,5-trihydroxy-6-[(2-hydroxy-2-methylpropanoyl)oxy                                  | C10H16O9   | 279.0703938 | Yes |
| 4097 | HMDB0126115                       | 6-(2-carboxy-2-methylethoxy)-3,4,5-trihydroxyoxane-2                                  | C10H16O9   | 279.0703938 | Yes |
| 4097 | HMDB0126116                       | 3,4,5-trihydroxy-6-[(3-hydroxy-2-methylpropanoyl)oxy                                  | C10H16O9   | 279.0703938 | Yes |
| 4097 | HMDB0130019                       | 1-methyl 3-(3,4,5,6-tetrahydroxyoxan-2-yl)methyl pro                                  | C10H16O9   | 279.0703938 | Yes |
| 4097 | HMDB0130129                       | 6-[(1-carboxypropan-2-yl)oxy]-3,4,5-trihydroxyoxane-2                                 | C10H16O9   | 279.0703938 | Yes |
| 4097 | HMDB0130130                       | 3,4,5-trihydroxy-6-[(3-hydroxybutanoyl)oxy]oxane-2- $\alpha$ :                        | C10H16O9   | 279.0703938 | Yes |
| 4097 | HMDB0130132                       | 6-(3-carboxypropoxy)-3,4,5-trihydroxyoxane-2-carboxy                                  | C10H16O9   | 279.0703938 | Yes |
| 4097 | HMDB0130133                       | 3,4,5-trihydroxy-6-[(4-hydroxybutanoyl)oxy]oxane-2- $\alpha$ :                        | C10H16O9   | 279.0703938 | Yes |
| 4097 | HMDB0130135                       | 6-(1-carboxypropoxy)-3,4,5-trihydroxyoxane-2-carboxy                                  | C10H16O9   | 279.0703938 | Yes |
| 4097 | HMDB0130136                       | 3,4,5-trihydroxy-6-[(2-hydroxybutanoyl)oxy]oxane-2- $\alpha$ :                        | C10H16O9   | 279.0703938 | Yes |
| 4099 | HMDB0000706; CHEBI:385866         | L-Aspartyl-L-phenylalanine                                                            | C13H16N2O5 | 279.0990882 | Yes |
| 4099 | HMDB0011167                       | L-beta-aspartyl-L-phenylalanine                                                       | C13H16N2O5 | 279.0990882 | Yes |
| 4099 | HMDB0015058; CHEBI:50567          | Levosimendan                                                                          | C14H12N6O  | 279.0990882 | Yes |
| 4099 | HMDB0028760                       | Aspartyl-Phenylalanine                                                                | C13H16N2O5 | 279.0990882 | Yes |
| 4099 | HMDB0028991                       | Phenylalanyl-Aspartate                                                                | C13H16N2O5 | 279.0990882 | Yes |
| 4102 | HMDB0035620                       | Artabsinolide A                                                                       | C15H20O5   | 279.1246217 | No  |
| 4102 | HMDB0036051                       | Dihydromarasmane                                                                      | C15H20O5   | 279.1246217 | No  |
| 4102 | HMDB0036094                       | Nigelllic acid                                                                        | C15H20O5   | 279.1246217 | No  |
| 4102 | HMDB0036095                       | 13-Hydroxyabscisic acid                                                               | C15H20O5   | 279.1246217 | No  |
| 4102 | HMDB0036695                       | Crispolide                                                                            | C15H20O5   | 279.1246217 | No  |
| 4102 | HMDB0038545                       | (1 $\beta$ ,4 $\alpha$ ,5 $\alpha$ ,6 $\beta$ ,8 $\alpha$ ,10 $\beta$ )-1,10:4,5-Diep | C15H20O5   | 279.1246217 | No  |
| 4102 | HMDB0041003                       | Vulgarolide                                                                           | C15H20O5   | 279.1246217 | No  |
| 4102 | HMDB0041144                       | 8-Deoxy-11,13-dihydroxygrosheimin                                                     | C15H20O5   | 279.1246217 | No  |
| 4102 | HMDB0133288                       | 2-hydroxy-3-[4-hydroxy-3-methoxy-5-(3-methylbut-2- $\epsilon$                         | C15H20O5   | 279.1246217 | No  |
| 4119 | HMDB0003331; C02494; CHEBI:16020  | 1-Methyladenosine                                                                     | C11H15N5O4 | 280.1025104 | No  |
| 4119 | HMDB0004044; CHEBI:21891          | N6-Methyladenosine                                                                    | C11H15N5O4 | 280.1025104 | No  |

|      |                                    |                                                          |             |             |     |
|------|------------------------------------|----------------------------------------------------------|-------------|-------------|-----|
| 4119 | HMDB0004326; C04779; CHEBI:119928  | 2''-O-Methyladenosine                                    | C11H15N5O4  | 280.1025104 | No  |
| 4119 | HMDB0006023                        | 3''-O-Methyladenosine                                    | C11H15N5O4  | 280.1025104 | No  |
| 4119 | HMDB0037843                        | N-(1-Deoxy-1-fructosyl)threonine                         | C10H19NO8   | 280.1025104 | No  |
| 4123 | HMDB0032791                        | Methyl 15-cyanopentadecanoate                            | C17H31NO2   | 280.2289743 | No  |
| 4126 | HMDB0002117; C19670; CHEBI:116314  | Oleamide                                                 | C18H35NO    | 280.2645396 | No  |
| 4141 | HMDB0040794                        | 5-Hydroxy-4-methoxy-6-canthinone 3-N-oxide               | C15H10N2O4  | 281.0588451 | No  |
| 4141 | HMDB0060868                        | Phenytoin quinone                                        | C15H10N2O4  | 281.0588451 | No  |
| 4142 | HMDB0030698; CHEBI:205093          | 5,7-Dimethoxyisoflavone                                  | C17H14O4    | 281.0816979 | No  |
| 4142 | HMDB0030719                        | 5,6-Dimethoxyflavone                                     | C17H14O4    | 281.0816979 | No  |
| 4142 | HMDB0036620; C10029; CHEBI:3684    | 5,7-Dimethoxyflavone                                     | C17H14O4    | 281.0816979 | No  |
| 4142 | HMDB0037255                        | 5-Hydroxy-7-methoxy-6-methylflavone                      | C17H14O4    | 281.0816979 | No  |
| 4142 | HMDB0130371                        | 7-methoxy-3-(3-methoxyphenyl)-4H-chromen-4-one           | C17H14O4    | 281.0816979 | No  |
| 4142 | HMDB0140467                        | 2-(3,5-dimethoxyphenyl)-4H-chromen-4-one                 | C17H14O4    | 281.0816979 | No  |
| 4143 | HMDB0013911; CHEBI:155605          | 12-Hydroxynevirapine                                     | C15H14N4O2  | 281.1017034 | Yes |
| 4143 | HMDB0013912                        | 2-Hydroxynevirapine                                      | C15H14N4O2  | 281.1017034 | Yes |
| 4143 | HMDB0013913                        | 8-Hydroxynevirapine                                      | C15H14N4O2  | 281.1017034 | Yes |
| 4143 | HMDB0013914                        | 3-Hydroxynevirapine                                      | C15H14N4O2  | 281.1017034 | Yes |
| 4143 | HMDB0125459                        | 2-[4,6-dihydroxy-3-(4-hydroxy-3-methylbut-2-en-1-yl)-    | C14H18O6    | 281.1017034 | Yes |
| 4143 | HMDB0125461                        | 2-[2,3,4-trihydroxy-6-methoxy-5-(3-methylbut-2-en-1-yl)- | C14H18O6    | 281.1017034 | Yes |
| 4143 | HMDB0125462                        | 2-{3-[(3,3-dimethyloxiran-2-yl)methyl]-4,6-dihydroxy-2   | C14H18O6    | 281.1017034 | Yes |
| 4143 | HMDB0125463                        | 2-[4,6-dihydroxy-2-methoxy-3-(3-methylbut-2-en-1-yl)]    | C14H18O6    | 281.1017034 | Yes |
| 4148 | HMDB0033375; CHEBI:83631           | Octyl gallate                                            | C15H22O5    | 281.1405233 | Yes |
| 4148 | HMDB0034941                        | Artabsinolide D                                          | C15H22O5    | 281.1405233 | Yes |
| 4148 | HMDB0034983                        | Cynaratriol                                              | C15H22O5    | 281.1405233 | Yes |
| 4148 | HMDB0035846                        | Anguidol                                                 | C15H22O5    | 281.1405233 | Yes |
| 4148 | HMDB0038660; C15971; CHEBI:23758   | Dihydrophaseic acid                                      | C15H22O5    | 281.1405233 | Yes |
| 4148 | HMDB0038661                        | Epidihydrophaseic acid                                   | C15H22O5    | 281.1405233 | Yes |
| 4148 | HMDB0038989                        | Oxyhumulinic acid                                        | C15H22O5    | 281.1405233 | Yes |
| 4148 | HMDB0039241                        | Pisumic acid                                             | C15H22O5    | 281.1405233 | Yes |
| 4148 | HMDB0041324                        | Bisbynin                                                 | C15H22O5    | 281.1405233 | Yes |
| 4150 | HMDB0061822; CHEBI:49793           | Hexaethylene glycol                                      | C12H26O7    | 281.1607021 | No  |
| 4151 | HMDB0031799; C19039                | Malonoben                                                | C18H22N2O   | 281.1658536 | No  |
| 4151 | HMDB0060992                        | 2-hydroxydesipramine                                     | C18H22N2O   | 281.1658536 | No  |
| 4152 | HMDB0033630                        | Lactapiperanol C                                         | C16H26O4    | 281.1762169 | Yes |
| 4156 | HMDB0000207; C00712; CHEBI:16196   | Oleic acid                                               | C18H34O2    | 281.2484002 | Yes |
| 4156 | HMDB0000573; C00712; CHEBI:27997   | Elaidic acid                                             | C18H34O2    | 281.2484002 | Yes |
| 4156 | HMDB0003231; C08367; CHEBI:28727   | Vaccenic acid                                            | C18H34O2    | 281.2484002 | Yes |
| 4156 | HMDB0041480; CHEBI:82617           | (Z)-13-Octadecenoic acid                                 | C18H34O2    | 281.2484002 | Yes |
| 4156 | HMDB0059871                        | Ethyl 9-hexadecenoate                                    | C18H34O2    | 281.2484002 | Yes |
| 4156 | HMDB0062218                        | (E)-13-Octadecenoic acid                                 | C18H34O2    | 281.2484002 | Yes |
| 4156 | HMDB0062242                        | 7Z-octadecenoic acid                                     | C18H34O2    | 281.2484002 | Yes |
| 4156 | HMDB0062703; CHEBI:36021           | Octadec-9-enoic Acid                                     | C18H34O2    | 281.2484002 | Yes |
| 4156 | HMDB0240219; CHEBI:50464           | cis-Vaccenic acid                                        | C18H34O2    | 281.2484002 | Yes |
| 4207 | HMDB0060791                        | 6-Thioinosinic acid                                      | C10H12N4O4S | 283.0495389 | Yes |
| 4208 | HMDB0002338; C00814; CHEBI:17574   | Biochanin A                                              | C16H12O5    | 283.0618005 | Yes |
| 4208 | HMDB0005781; C14536; CHEBI:542494  | Glycitein                                                | C16H12O5    | 283.0618005 | Yes |
| 4208 | HMDB0029522; C11577; CHEBI:1272299 | 5,7-Dihydroxy-3-methoxyflavone                           | C16H12O5    | 283.0618005 | Yes |
| 4208 | HMDB0030768; CHEBI:103729          | 2-(6-Hydroxy-2-methoxy-3,4-methylenedioxyphenyl)br       | C16H12O5    | 283.0618005 | Yes |
| 4208 | HMDB0031428                        | Farnisin                                                 | C16H12O5    | 283.0618005 | Yes |
| 4208 | HMDB0031720; C02920; CHEBI:17678   | Xenognosin B                                             | C16H12O5    | 283.0618005 | Yes |
| 4208 | HMDB0034127; C10521; CHEBI:8600    | Prunetin                                                 | C16H12O5    | 283.0618005 | Yes |
| 4208 | HMDB0036629; CHEBI:73029           | (-)-Maackiain                                            | C16H12O5    | 283.0618005 | Yes |
| 4208 | HMDB0039166                        | Cajaquinone                                              | C16H12O5    | 283.0618005 | Yes |
| 4208 | HMDB0039578                        | 1,5-Dihydroxy-2-methoxy-6-methylanthraquinone            | C16H12O5    | 283.0618005 | Yes |
| 4208 | HMDB0041758; C10504                | Melanettin                                               | C16H12O5    | 283.0618005 | Yes |
| 4208 | HMDB0041776                        | Stevenin                                                 | C16H12O5    | 283.0618005 | Yes |
| 4208 | HMDB0128584                        | 5,7-dihydroxy-6-methoxy-2-phenyl-4H-chromen-4-one        | C16H12O5    | 283.0618005 | Yes |
| 4208 | HMDB0128588                        | 6,7-dihydroxy-5-methoxy-2-phenyl-4H-chromen-4-one        | C16H12O5    | 283.0618005 | Yes |
| 4208 | HMDB0130320                        | 5,7-dihydroxy-2-(3-methoxyphenyl)-4H-chromen-4-on        | C16H12O5    | 283.0618005 | Yes |
| 4208 | HMDB0130374                        | 3-(3,4-dihydroxyphenyl)-7-methoxy-4H-chromen-4-on        | C16H12O5    | 283.0618005 | Yes |
| 4208 | HMDB0130379                        | 7-hydroxy-3-(4-hydroxy-3-methoxyphenyl)-4H-chrome        | C16H12O5    | 283.0618005 | Yes |

|      |                                   |                                                       |             |             |     |
|------|-----------------------------------|-------------------------------------------------------|-------------|-------------|-----|
| 4208 | HMDB0130929                       | 7-hydroxy-2-(4-hydroxyphenyl)-6-methoxy-4H-chrome     | C16H12O5    | 283.0618005 | Yes |
| 4208 | HMDB0132455                       | 7-hydroxy-2-(4-hydroxyphenyl)-5-methoxy-4H-chrome     | C16H12O5    | 283.0618005 | Yes |
| 4208 | HMDB0132457                       | 5,7-dihydroxy-2-(4-methoxyphenyl)-4H-chromen-4-one    | C16H12O5    | 283.0618005 | Yes |
| 4208 | HMDB0132850                       | 6,7-dihydroxy-3-(4-methoxyphenyl)-4H-chromen-4-one    | C16H12O5    | 283.0618005 | Yes |
| 4208 | HMDB0132873                       | 7,8-dihydroxy-6-methoxy-3-phenyl-4H-chromen-4-one     | C16H12O5    | 283.0618005 | Yes |
| 4208 | HMDB0132886                       | 5,7-dihydroxy-6-methoxy-3-phenyl-4H-chromen-4-one     | C16H12O5    | 283.0618005 | Yes |
| 4208 | HMDB0133330                       | 7-hydroxy-2-(4-hydroxy-3-methoxyphenyl)-4H-chrome     | C16H12O5    | 283.0618005 | Yes |
| 4208 | HMDB0134889                       | 5,6-dihydroxy-7-methoxy-2-phenyl-4H-chromen-4-one     | C16H12O5    | 283.0618005 | Yes |
| 4208 | HMDB0137557                       | 6-hydroxy-2-[(4-hydroxy-3-methoxyphenyl)methyliden]   | C16H12O5    | 283.0618005 | Yes |
| 4208 | HMDB0140471                       | 2-(3,5-dihydroxy-4-methoxyphenyl)-4H-chromen-4-one    | C16H12O5    | 283.0618005 | Yes |
| 4208 | HMDB0141945                       | 7,8-dihydroxy-3-(4-methoxyphenyl)-4H-chromen-4-one    | C16H12O5    | 283.0618005 | Yes |
| 4209 | HMDB0000299; C01762; CHEBI:18107  | Xanthosine                                            | C10H12N4O6  | 283.0688092 | Yes |
| 4210 | HMDB0011686; CHEBI:87986          | p-Cresol glucuronide                                  | C13H16O7    | 283.0824819 | No  |
| 4210 | HMDB0034618                       | 2-O-Benzoyl-D-glucose                                 | C13H16O7    | 283.0824819 | No  |
| 4210 | HMDB0038492                       | D-Vacciniin                                           | C13H16O7    | 283.0824819 | No  |
| 4212 | HMDB0029819                       | 2-Phenylethyl beta-D-glucopyranoside                  | C14H20O6    | 283.1180672 | Yes |
| 4213 | HMDB0014564; C07379; CHEBI:8459   | Promazine                                             | C17H20N2S   | 283.1279273 | Yes |
| 4213 | HMDB0015202; C07404; CHEBI:8461   | Promethazine                                          | C17H20N2S   | 283.1279273 | Yes |
| 4215 | HMDB0060593                       | Alpha-dihydroartemisinin                              | C15H24O5    | 283.1556909 | Yes |
| 4215 | HMDB0061088                       | Dihydroartemisinin (DHA)                              | C15H24O5    | 283.1556909 | Yes |
| 4220 | HMDB0000827; C01530; CHEBI:28842  | Stearic acid                                          | C18H36O2    | 283.2643917 | Yes |
| 4220 | HMDB0029811; CHEBI:84932          | Ethyl hexadecanoate                                   | C18H36O2    | 283.2643917 | Yes |
| 4220 | HMDB0031066; CHEBI:1305874        | 16-Methylheptadecanoic acid                           | C18H36O2    | 283.2643917 | Yes |
| 4220 | HMDB0061946                       | Hexyl dodecanoate                                     | C18H36O2    | 283.2643917 | Yes |
| 4233 | HMDB0006211; C04640; CHEBI:18413  | 2-(Formamido)-N1-(5-phospho-D-ribosyl)acetamide       | C6H12N3O8P  | 284.0277321 | Yes |
| 4234 | HMDB0015166; C07372; CHEBI:177474 | Probenecid                                            | C13H19NO4S  | 284.0966901 | Yes |
| 4240 | HMDB0013324                       | 2-Octenoylcarnitine                                   | C15H27NO4   | 284.1876253 | No  |
| 4258 | HMDB0132992                       | {[(4E)-5-(4-methoxyphenyl)-3-oxopent-4-en-2-yl]oxy}si | C12H14O6S   | 285.044585  | No  |
| 4258 | HMDB0132996                       | {[(4E)-5-(4-methoxyphenyl)-3-oxopent-4-en-1-yl]oxy}si | C12H14O6S   | 285.044585  | No  |
| 4258 | HMDB0140410                       | 3-(3-methylbut-2-en-1-yl)-4-(sulfooxy)benzoic acid    | C12H14O6S   | 285.044585  | No  |
| 4259 | HMDB0029498                       | 3''-Methoxyfukiic acid                                | C12H14O8    | 285.0619746 | Yes |
| 4259 | HMDB0041272                       | Uralenneoside                                         | C12H14O8    | 285.0619746 | Yes |
| 4259 | HMDB0059998; CHEBI:88743          | Diphenol glucuronide                                  | C12H14O8    | 285.0619746 | Yes |
| 4259 | HMDB0124997                       | 3,4,5-trihydroxy-6-(2-hydroxyphenoxy)oxane-2-carbox   | C12H14O8    | 285.0619746 | Yes |
| 4259 | HMDB0125471                       | 3,4,5-trihydroxy-6-(3-hydroxyphenoxy)oxane-2-carbox   | C12H14O8    | 285.0619746 | Yes |
| 4259 | HMDB0135181                       | 3,4,5-trihydroxy-6-(4-hydroxyphenoxy)oxane-2-carbox   | C12H14O8    | 285.0619746 | Yes |
| 4261 | HMDB0013895                       | 3'',4''-Dihydrodiol                                   | C15H14N2O4  | 285.0860352 | No  |
| 4261 | HMDB0060866                       | Phenytol dihydrodiol                                  | C15H14N2O4  | 285.0860352 | No  |
| 4262 | HMDB0006408; CHEBI:63799          | 4-Hydroxy tolbutamide                                 | C12H18N2O4S | 285.0914412 | No  |
| 4262 | HMDB0030840; CHEBI:745302         | 2-Methoxy-9-phenyl-1H-phenalen-1-one                  | C20H14O2    | 285.0914412 | No  |
| 4262 | HMDB0060438                       | Benzo[a]pyrene-7,8-diol                               | C20H14O2    | 285.0914412 | No  |
| 4264 | HMDB0030152                       | 4''-Hydroxy-5,7-dimethoxyflavan                       | C17H18O4    | 285.1157853 | No  |
| 4264 | HMDB0030521; C10526               | Sativan                                               | C17H18O4    | 285.1157853 | No  |
| 4264 | HMDB0034024                       | Isosativan                                            | C17H18O4    | 285.1157853 | No  |
| 4264 | HMDB0041168                       | Myrigalone G                                          | C17H18O4    | 285.1157853 | No  |
| 4264 | HMDB0041169                       | Myrigalone H                                          | C17H18O4    | 285.1157853 | No  |
| 4264 | HMDB0041671                       | 4''-Hydroxy-3,4,5-trimethoxystilbene                  | C17H18O4    | 285.1157853 | No  |
| 4264 | HMDB0041680                       | 4-Hydroxy-3,5,4''-trimethoxystilbene                  | C17H18O4    | 285.1157853 | No  |
| 4264 | HMDB0126611                       | 3-phenyl-1-(2,4,6-trihydroxy-3,5-dimethylphenyl)prop  | C17H18O4    | 285.1157853 | No  |
| 4264 | HMDB0130384                       | 3-(3,4-dimethoxyphenyl)-3,4-dihydro-2H-1-benzopyrar   | C17H18O4    | 285.1157853 | No  |
| 4264 | HMDB0130572                       | 6,8-dimethyl-2-phenyl-3,4-dihydro-2H-1-benzopyran-4   | C17H18O4    | 285.1157853 | No  |
| 4264 | HMDB0132858                       | 6-methoxy-3-(4-methoxyphenyl)-3,4-dihydro-2H-1-ber    | C17H18O4    | 285.1157853 | No  |
| 4264 | HMDB0132908                       | 1-(2-hydroxy-4,6-dimethoxyphenyl)-3-phenylpropan-1    | C17H18O4    | 285.1157853 | No  |
| 4264 | HMDB0133974                       | 1-(2-hydroxy-3,4-dimethoxyphenyl)-3-phenylpropan-1    | C17H18O4    | 285.1157853 | No  |
| 4269 | HMDB0060995                       | 10-alpha-methoxy-9,10-dihydrolysergol                 | C17H22N2O2  | 285.1614354 | No  |
| 4270 | HMDB0240222; CHEBI:104017         | Thonzylamine                                          | C16H22N4O   | 285.1711743 | Yes |
| 4272 | HMDB0000672; C19615; CHEBI:73722  | Hexadecanedioic acid                                  | C16H30O4    | 285.2069682 | No  |
| 4272 | HMDB0041287                       | 16-Hydroxy-10-oxohexadecanoic acid                    | C16H30O4    | 285.2069682 | No  |
| 4272 | HMDB0059777                       | 2,2,4-Trimethyl-1,3-pentadienol diisobutyrate         | C16H30O4    | 285.2069682 | No  |
| 4292 | HMDB0029914                       | Tetraphyllin B                                        | C12H17NO7   | 286.0941124 | No  |
| 4293 | HMDB0002089; CHEBI:90055          | N-Ribosylhistidine                                    | C11H17N3O6  | 286.1050281 | No  |

|      |                                   |                                                         |            |             |     |
|------|-----------------------------------|---------------------------------------------------------|------------|-------------|-----|
| 4295 | HMDB0014812; C08526; CHEBI:5264   | Galantamine                                             | C17H21NO3  | 286.1450601 | Yes |
| 4295 | HMDB0014887; C06991; CHEBI:4909   | Etodolac                                                | C17H21NO3  | 286.1450601 | Yes |
| 4295 | HMDB0015005; C07239; CHEBI:147138 | Ritodrine                                               | C17H21NO3  | 286.1450601 | Yes |
| 4295 | HMDB0033874                       | Piperanine                                              | C17H21NO3  | 286.1450601 | Yes |
| 4295 | HMDB0040699                       | Feruperine                                              | C17H21NO3  | 286.1450601 | Yes |
| 4295 | HMDB0041956                       | Nordihydrocodeine                                       | C17H21NO3  | 286.1450601 | Yes |
| 4295 | HMDB0060548; C11782               | Dihydromorphine                                         | C17H21NO3  | 286.1450601 | Yes |
| 4295 | HMDB0060796                       | 6alpha-Hydroxy-hydromorphone                            | C17H21NO3  | 286.1450601 | Yes |
| 4295 | HMDB0060798                       | 6beta-Hydroxy-hydromorphone                             | C17H21NO3  | 286.1450601 | Yes |
| 4295 | HMDB0060854                       | Nordihydroisomorphine                                   | C17H21NO3  | 286.1450601 | Yes |
| 4299 | HMDB0000791; C02838; CHEBI:18102  | L-Octanoylcarnitine                                     | C15H29NO4  | 286.2027167 | No  |
| 4301 | HMDB0032358                       | Lauroyl diethanolamide                                  | C16H33NO3  | 286.2391217 | No  |
| 4324 | HMDB0029191; CHEBI:134254         | 5''-(3'',4''-Dihydroxyphenyl)-gamma-valerolactone sulf. | C11H12O7S  | 287.0237102 | No  |
| 4324 | HMDB0135678                       | {4-[(1Z)-2-hydroxy-3-oxobut-1-en-1-yl]-2-methoxyphenyl} | C11H12O7S  | 287.0237102 | No  |
| 4324 | HMDB0135688                       | [2-hydroxy-6-methoxy-4-(3-oxobut-1-en-1-yl)phenyl]oxy   | C11H12O7S  | 287.0237102 | No  |
| 4324 | HMDB0135693                       | [4-(3-acetyloxiran-2-yl)-2-methoxyphenyl]oxidan         | C11H12O7S  | 287.0237102 | No  |
| 4324 | HMDB0135695                       | [4-(4-hydroxy-3-oxobut-1-en-1-yl)-2-methoxyphenyl]oxy   | C11H12O7S  | 287.0237102 | No  |
| 4324 | HMDB0135696                       | {[4-(4-hydroxy-3-methoxyphenyl)-2-oxobut-3-en-1-yl]c    | C11H12O7S  | 287.0237102 | No  |
| 4325 | HMDB0000788; C01103; CHEBI:25722  | Orotidine                                               | C10H12N2O8 | 287.0525228 | Yes |
| 4329 | HMDB0132970                       | {[1-(4-methoxyphenyl)-4-methylpentan-3-yl]oxy}sulfon    | C13H20O5S  | 287.097721  | Yes |
| 4330 | HMDB0034881                       | 3-Carboxy-2,3,4,9-tetrahydro-1H-pyrido[3,4-b]indole-1   | C15H16N2O4 | 287.1041808 | No  |
| 4334 | HMDB0034913; C11083               | Imazamethabenz-methyl                                   | C16H20N2O3 | 287.1402112 | Yes |
| 4334 | HMDB0037554                       | (±)-Rollipyrrole                                        | C16H20N2O3 | 287.1402112 | Yes |
| 4341 | HMDB0037798; C08285               | (5S)-10,16-Dihydroxyhexadecanoic acid                   | C16H32O4   | 287.2228022 | No  |
| 4341 | HMDB0072841                       | MG(a-13:0/0:0/0:0)[rac]                                 | C16H32O4   | 287.2228022 | No  |
| 4341 | HMDB0072843                       | MG(0:0/a-13:0/0:0)[rac]                                 | C16H32O4   | 287.2228022 | No  |
| 4341 | HMDB0072845                       | MG(13:0/0:0/0:0)                                        | C16H32O4   | 287.2228022 | No  |
| 4341 | HMDB0072861                       | MG(0:0/13:0/0:0)                                        | C16H32O4   | 287.2228022 | No  |
| 4341 | HMDB0072870                       | MG(0:0/i-13:0/0:0)                                      | C16H32O4   | 287.2228022 | No  |
| 4355 | HMDB0005765; CHEBI:84058          | Ophthalmic acid                                         | C11H19N3O6 | 288.1209498 | Yes |
| 4356 | HMDB0061151                       | Hydroxylated N-acetyl desmethyl frovatriptan            | C15H19N3O3 | 288.1353541 | No  |
| 4357 | HMDB0000552; CHEBI:70857          | 3-Methylglutaryl carnitine                              | C13H23NO6  | 288.1457541 | No  |
| 4357 | HMDB0061677; CHEBI:68568          | O-Adipoyl carnitine                                     | C13H23NO6  | 288.1457541 | No  |
| 4360 | HMDB0014783; C07881; CHEBI:4724   | Dyclonine                                               | C18H27NO2  | 288.1973612 | No  |
| 4360 | HMDB0031183                       | N-(2-Hydroxyisobutyl)-2,4,8,10,12-tetradecapentaenar    | C18H27NO2  | 288.1973612 | No  |
| 4376 | HMDB0038459                       | 5-(4-Acetoxy-3-oxo-1-butynyl)-2,2''-bithiophene         | C14H10O3S2 | 289.0004666 | Yes |
| 4378 | HMDB0001068; C00281; CHEBI:15721  | D-Sedoheptulose 7-phosphate                             | C7H15O10P  | 289.0304466 | Yes |
| 4378 | HMDB0060509; C06222; CHEBI:9082   | Sedoheptulose 1-phosphate                               | C7H15O10P  | 289.0304466 | Yes |
| 4379 | HMDB0059975; CHEBI:88682          | 4-Hydroxy-5-(3''-hydroxyphenyl)-valeric acid-3''-O-sulp | C11H14O7S  | 289.03889   | Yes |
| 4379 | HMDB0059976; CHEBI:88683          | 4-Hydroxy-5-(4''-hydroxyphenyl)-valeric acid-4''-O-sulp | C11H14O7S  | 289.03889   | Yes |
| 4379 | HMDB0125823                       | (5S,7-dihydroxy-2,2-dimethyl-3,4-dihydro-2H-1-benzop)   | C11H14O7S  | 289.03889   | Yes |
| 4379 | HMDB0127756                       | 5-(3-hydroxyphenyl)-4-(sulfooxy)pentanoic acid          | C11H14O7S  | 289.03889   | Yes |
| 4379 | HMDB0127760                       | 5-[4-hydroxy-3-(sulfooxy)phenyl]pentanoic acid          | C11H14O7S  | 289.03889   | Yes |
| 4379 | HMDB0135701                       | [4-(1-hydroxy-3-oxobutyl)-2-methoxyphenyl]oxidan        | C11H14O7S  | 289.03889   | Yes |
| 4379 | HMDB0135702                       | [1-(4-hydroxy-3-methoxyphenyl)-3-oxobutoxy]sulfonic     | C11H14O7S  | 289.03889   | Yes |
| 4379 | HMDB0135708                       | [2-hydroxy-6-methoxy-4-(3-oxobutyl)phenyl]oxidan        | C11H14O7S  | 289.03889   | Yes |
| 4379 | HMDB0135711                       | [4-(4-hydroxy-3-oxobutyl)-2-methoxyphenyl]oxidan        | C11H14O7S  | 289.03889   | Yes |
| 4379 | HMDB0135712                       | [4-(4-hydroxy-3-methoxyphenyl)-2-oxobutoxy]sulfonic     | C11H14O7S  | 289.03889   | Yes |
| 4379 | HMDB0135714                       | [4-(2-hydroxy-3-oxobutyl)-2-methoxyphenyl]oxidan        | C11H14O7S  | 289.03889   | Yes |
| 4379 | HMDB0135715                       | {[1-(4-hydroxy-3-methoxyphenyl)-3-oxobutan-2-yl]oxy     | C11H14O7S  | 289.03889   | Yes |
| 4380 | HMDB0031779; C11111; CHEBI:6047   | Isoprothiolane                                          | C12H18O4S2 | 289.0564367 | Yes |
| 4381 | HMDB0038666                       | L-N-(1H-Indol-3-ylacetyl)aspartic acid                  | C14H14N2O5 | 289.0827414 | No  |
| 4381 | HMDB0039500                       | N-Malonyltryptophan                                     | C14H14N2O5 | 289.0827414 | No  |
| 4382 | HMDB0038722                       | 5,6-Dihydro-11-methoxyyangonin                          | C16H18O5   | 289.1077869 | Yes |
| 4382 | HMDB0127764                       | 2-[2-hydroxy-3-(3-methoxyphenyl)propyl]benzene-1,3,     | C16H18O5   | 289.1077869 | Yes |
| 4383 | HMDB0014583; C01965; CHEBI:45924  | Trimethoprim                                            | C14H18N4O3 | 289.1308872 | Yes |
| 4383 | HMDB0031767; C10896; CHEBI:3015   | Benomyl                                                 | C14H18N4O3 | 289.1308872 | Yes |
| 4384 | HMDB0032223; CHEBI:38708          | Diisopentyl thiomalate                                  | C14H26O4S  | 289.148677  | No  |
| 4386 | HMDB0032959                       | 1-Octen-3-yl glucoside                                  | C14H26O6   | 289.1661785 | Yes |
| 4402 | HMDB0142153                       | (2S)-2-amino-3-[4-hydroxy-3-(sulfooxy)phenyl]-2-meth    | C10H13NO7S | 290.0344966 | No  |
| 4406 | HMDB0002354                       | Hawkinsin                                               | C11H17NO6S | 290.0703496 | Yes |

|      |                                      |                                                                         |            |             |     |
|------|--------------------------------------|-------------------------------------------------------------------------|------------|-------------|-----|
| 4406 | HMDB0060609                          | Orciprenaline-3-O-sulfate                                               | C11H17NO6S | 290.0703496 | Yes |
| 4416 | HMDB0015114; C06932; CHEBI:4024      | Cyclopentolate                                                          | C17H25NO3  | 290.1757315 | No  |
| 4416 | HMDB0015341; C07914; CHEBI:6438      | Levobunolol                                                             | C17H25NO3  | 290.1757315 | No  |
| 4416 | HMDB0036327                          | Norcapsaicin                                                            | C17H25NO3  | 290.1757315 | No  |
| 4439 | HMDB0124954                          | [2-hydroxy-5-(2-hydroxy-3-methoxy-3-oxopropyl)phenyl]propanoic acid     | C10H12O8S  | 291.0206624 | Yes |
| 4439 | HMDB0124955                          | {[3-(3,4-dihydroxyphenyl)-1-methoxy-1-oxopropan-2-yl]oxy}propanoic acid | C10H12O8S  | 291.0206624 | Yes |
| 4439 | HMDB0127788                          | 2-hydroxy-3-[3-methoxy-4-(sulfooxy)phenyl]propanoic acid                | C10H12O8S  | 291.0206624 | Yes |
| 4439 | HMDB0127789                          | 3-(4-hydroxy-3-methoxyphenyl)-2-(sulfooxy)propanoic acid                | C10H12O8S  | 291.0206624 | Yes |
| 4439 | HMDB0127843                          | 2-hydroxy-3-[4-methoxy-3-(sulfooxy)phenyl]propanoic acid                | C10H12O8S  | 291.0206624 | Yes |
| 4439 | HMDB0127844                          | 3-(3-hydroxy-4-methoxyphenyl)-2-(sulfooxy)propanoic acid                | C10H12O8S  | 291.0206624 | Yes |
| 4439 | HMDB0128005                          | 3-[3-hydroxy-5-methoxy-4-(sulfooxy)phenyl]propanoic acid                | C10H12O8S  | 291.0206624 | Yes |
| 4439 | HMDB0133893                          | 2-[2-hydroxy-4-methoxy-3-(sulfooxy)phenyl]propanoic acid                | C10H12O8S  | 291.0206624 | Yes |
| 4441 | HMDB0039404                          | 3-Hydroxy-9-(4-hydroxyphenyl)-1H,3H-naphtho[1,8-cd]                     | C18H12O4   | 291.0642625 | No  |
| 4441 | HMDB0039405                          | 3-Hydroxy-4-(4-hydroxyphenyl)-1H,3H-naphtho[1,8-cd]                     | C18H12O4   | 291.0642625 | No  |
| 4442 | HMDB0041269                          | Pantoyllactone glucoside                                                | C12H20O8   | 291.1089679 | Yes |
| 4443 | HMDB0028887                          | Histidinyll-histidine                                                   | C12H16N6O3 | 291.1187387 | No  |
| 4444 | HMDB0030767; CHEBI:110179            | 11,12-Dimethoxydihydrokawain                                            | C16H20O5   | 291.1250627 | Yes |
| 4444 | HMDB0037774                          | Coriandrone A                                                           | C16H20O5   | 291.1250627 | Yes |
| 4444 | HMDB0037775                          | Coriandrone B                                                           | C16H20O5   | 291.1250627 | Yes |
| 4444 | HMDB0094645; CHEBI:132606            | Mono-(2-ethyl-5-oxohexyl) phthalate                                     | C16H20O5   | 291.1250627 | Yes |
| 4448 | HMDB0032958                          | (S)-3-Octanol glucoside                                                 | C14H28O6   | 291.1814597 | No  |
| 4460 | HMDB0028994                          | Phenylalanyl-Glutamate                                                  | C14H17N2O5 | 292.1049729 | No  |
| 4460 | HMDB0029353                          | Galactosyl 4-hydroxyproline                                             | C11H19NO8  | 292.1049729 | No  |
| 4460 | HMDB0029354                          | 4-Hydroxyproline galactoside                                            | C11H19NO8  | 292.1049729 | No  |
| 4460 | HMDB0034085                          | (3R)-3,4-Dihydroxy-3-(hydroxymethyl)butanenitrile 4-g                   | C11H19NO8  | 292.1049729 | No  |
| 4460 | HMDB0060493; C02713; CHEBI:21615     | N-Acetylmuramate                                                        | C11H19NO8  | 292.1049729 | No  |
| 4486 | HMDB0135202                          | (2-hydroxy-1,2-diphenylethoxy)sulfonic acid                             | C14H14O5S  | 293.0492576 | No  |
| 4488 | HMDB0039825                          | Cyclocalopin F                                                          | C15H18O6   | 293.1035683 | No  |
| 4489 | HMDB0000594; HMDB0029562; CHEBI:8958 | gamma-Glutamylphenylalanine                                             | C14H18N2O5 | 293.1145683 | Yes |
| 4489 | HMDB0001894; C11045; CHEBI:2877      | Aspartame                                                               | C14H18N2O5 | 293.1145683 | Yes |
| 4489 | HMDB0028875                          | Hydroxypropyl-Tyrosine                                                  | C14H18N2O5 | 293.1145683 | Yes |
| 4489 | HMDB0029106                          | Tyrosyl-Hydroxyproline                                                  | C14H18N2O5 | 293.1145683 | Yes |
| 4489 | HMDB0029156; HMDB0028826             | Glutamylphenylalanine                                                   | C14H18N2O5 | 293.1145683 | Yes |
| 4489 | HMDB0031865                          | 4"-tert-Butyl-2",6"-dimethyl-3",5"-dinitroacetophenone                  | C14H18N2O5 | 293.1145683 | Yes |
| 4489 | HMDB0038514                          | L-gamma-Glutamyl-beta-phenyl-beta-L-alanine                             | C14H18N2O5 | 293.1145683 | Yes |
| 4492 | HMDB0028919                          | Isoleucyl-Tyrosine                                                      | C15H22N2O4 | 293.1505881 | No  |
| 4492 | HMDB0028941                          | Leucyl-Tyrosine                                                         | C15H22N2O4 | 293.1505881 | No  |
| 4492 | HMDB0029108                          | Tyrosyl-Isoleucine                                                      | C15H22N2O4 | 293.1505881 | No  |
| 4492 | HMDB0029109                          | Tyrosyl-Leucine                                                         | C15H22N2O4 | 293.1505881 | No  |
| 4492 | HMDB0033464                          | Sinapoylputrescine                                                      | C15H22N2O4 | 293.1505881 | No  |
| 4492 | HMDB0139646                          | N-(4-aminobutyl)-3-(4-hydroxy-3,5-dimethoxyphenyl)p                     | C15H22N2O4 | 293.1505881 | No  |
| 4493 | HMDB0035443                          | (E,E)-1,6-bis(4-methoxyphenyl)-1,5-hexadiene                            | C20H22O2   | 293.1552085 | No  |
| 4493 | HMDB0038543                          | Longistylin A                                                           | C20H22O2   | 293.1552085 | No  |
| 4495 | HMDB0004668; C14765; CHEBI:902350    | 13-OxoODE                                                               | C18H30O3   | 293.2121629 | No  |
| 4495 | HMDB0004669; C14766                  | 9-OxoODE                                                                | C18H30O3   | 293.2121629 | No  |
| 4495 | HMDB0010200                          | A-12(13)-EpODE                                                          | C18H30O3   | 293.2121629 | No  |
| 4495 | HMDB0010203; CHEBI:72641             | 13-HOTE                                                                 | C18H30O3   | 293.2121629 | No  |
| 4495 | HMDB0010206                          | 15(16)-EpODE                                                            | C18H30O3   | 293.2121629 | No  |
| 4495 | HMDB0010220                          | 9(10)-EpODE                                                             | C18H30O3   | 293.2121629 | No  |
| 4495 | HMDB0010224; CHEBI:88438             | 9-HOTE                                                                  | C18H30O3   | 293.2121629 | No  |
| 4495 | HMDB0011108; C16346                  | 17-Hydroxylinolenic acid                                                | C18H30O3   | 293.2121629 | No  |
| 4495 | HMDB0029786                          | 10-Oxo-11-octadecen-13-olide                                            | C18H30O3   | 293.2121629 | No  |
| 4495 | HMDB0029969                          | Squamostanol A                                                          | C18H30O3   | 293.2121629 | No  |
| 4495 | HMDB0030950                          | 15,16-Epoxy-9,12-octadecadienoic acid                                   | C18H30O3   | 293.2121629 | No  |
| 4495 | HMDB0030995; C19827; CHEBI:60956     | (2"E,4"Z,8E)-Colneleic acid                                             | C18H30O3   | 293.2121629 | No  |
| 4495 | HMDB0031088                          | 12,13-Epoxy-9,15-octadecadienoic acid                                   | C18H30O3   | 293.2121629 | No  |
| 4495 | HMDB0031103                          | 2-Hydroxylinolenic acid                                                 | C18H30O3   | 293.2121629 | No  |
| 4495 | HMDB0031934; CHEBI:89388             | (9S,10E,12Z,15Z)-9-Hydroxy-10,12,15-octadecatrienoic acid               | C18H30O3   | 293.2121629 | No  |
| 4495 | HMDB0034586                          | (9Z,12Z,14E)-16-Hydroxy-9,12,14-octadecatrienoic acid                   | C18H30O3   | 293.2121629 | No  |
| 4495 | HMDB0036832                          | Sterebin D                                                              | C18H30O3   | 293.2121629 | No  |
| 4495 | HMDB0039603                          | 3,4-Dimethyl-5-pentyl-2-furanheptanoic acid                             | C18H30O3   | 293.2121629 | No  |

|      |                                   |                                                                   |              |             |     |
|------|-----------------------------------|-------------------------------------------------------------------|--------------|-------------|-----|
| 4495 | HMDB0061644                       | 3,4-Dimethyl-5-propyl-2-furannonanoic acid                        | C18H30O3     | 293.2121629 | No  |
| 4495 | HMDB0062288                       | 12(13)-epoxy-6Z,9Z-octadecadienoic acid                           | C18H30O3     | 293.2121629 | No  |
| 4495 | HMDB0112093                       | 5-Heptyl-2-furanheptanoic acid                                    | C18H30O3     | 293.2121629 | No  |
| 4495 | HMDB0112099                       | 5-Hexyl-2-furanooctanoic acid                                     | C18H30O3     | 293.2121629 | No  |
| 4495 | HMDB0112102                       | 5-pentyl-2-furannonanoic acid                                     | C18H30O3     | 293.2121629 | No  |
| 4495 | HMDB0112103                       | 5-Butyl-3-methyl-2-furannonanoic acid                             | C18H30O3     | 293.2121629 | No  |
| 4514 | HMDB0013854; CHEBI:116400         | N4-Acetylsulfamethoxazole                                         | C12H13N3O4S  | 294.0557075 | No  |
| 4555 | HMDB0031780; C18574               | Dithianon                                                         | C14H4N2O2S2  | 294.9666336 | No  |
| 4558 | HMDB0130036                       | {{[(3E)-4-(1-oxo-1H-isochromen-3-yl)but-3-en-2-yl]oxy}: C13H12O6S | C13H12O6S    | 295.0284963 | No  |
| 4558 | HMDB0130043                       | {{[(3E)-4-(1-oxo-1H-isochromen-3-yl)but-3-en-1-yl]oxy}: C13H12O6S | C13H12O6S    | 295.0284963 | No  |
| 4559 | HMDB0041059                       | N-Methoxyspirobrassinol methyl ether                              | C13H16N2O2S2 | 295.058943  | No  |
| 4562 | HMDB0038120; C09674               | Ovalicin                                                          | C16H24O5     | 295.1554241 | Yes |
| 4562 | HMDB0039376                       | Methyl dihydrophaseate                                            | C16H24O5     | 295.1554241 | Yes |
| 4562 | HMDB0041551                       | 3,8-Dihydroxy-6-methoxy-7(11)-eremophilen-12,8-olid               | C16H24O5     | 295.1554241 | Yes |
| 4563 | HMDB0001926; C07534; CHEBI:4903   | 17a-Ethynylestradiol                                              | C20H24O2     | 295.1694194 | Yes |
| 4563 | HMDB0015125; C08162; CHEBI:4953   | Exemestane                                                        | C20H24O2     | 295.1694194 | Yes |
| 4563 | HMDB0033293                       | 5-Methoxy-1,7-diphenyl-3-heptanone                                | C20H24O2     | 295.1694194 | Yes |
| 4563 | HMDB0061097                       | 17-alpha-ethinyl estradiol                                        | C20H24O2     | 295.1694194 | Yes |
| 4572 | HMDB0013622; C00174; CHEBI:37527  | Nonadeca-10(Z)-enoic acid                                         | C19H36O2     | 295.2638443 | No  |
| 4572 | HMDB0035575                       | 4,6-Nonadecanedione                                               | C19H36O2     | 295.2638443 | No  |
| 4594 | HMDB0001563; C04545; CHEBI:19062  | 1-Methylguanosine                                                 | C11H15N5O5   | 296.0990768 | No  |
| 4594 | HMDB0005862; CHEBI:19702          | 2-Methylguanosine                                                 | C11H15N5O5   | 296.0990768 | No  |
| 4594 | HMDB0006038; CHEBI:70867          | 3''-O-Methylguanosine                                             | C11H15N5O5   | 296.0990768 | No  |
| 4594 | HMDB0015401; CHEBI:63612          | Nelarabine                                                        | C11H15N5O5   | 296.0990768 | No  |
| 4618 | HMDB0060834                       | N-Acetylserotonin sulfate                                         | C12H14N2O5S  | 297.0554898 | Yes |
| 4619 | HMDB0029512; CHEBI:1271609        | 4'',5-Dihydroxy-7-methoxy-6-methylflavone                         | C17H14O5     | 297.0745895 | No  |
| 4619 | HMDB0030718; C10527               | Sayanedin                                                         | C17H14O5     | 297.0745895 | No  |
| 4619 | HMDB0038811                       | Alfalone                                                          | C17H14O5     | 297.0745895 | No  |
| 4619 | HMDB0128582                       | 7-hydroxy-5,6-dimethoxy-2-phenyl-4H-chromen-4-one                 | C17H14O5     | 297.0745895 | No  |
| 4619 | HMDB0130361                       | 3-(3-hydroxy-4-methoxyphenyl)-7-methoxy-4H-chromen-4-one          | C17H14O5     | 297.0745895 | No  |
| 4619 | HMDB0130362                       | 3-(3,4-dimethoxyphenyl)-7-hydroxy-4H-chromen-4-one                | C17H14O5     | 297.0745895 | No  |
| 4619 | HMDB0130368                       | 6-hydroxy-7-methoxy-3-(3-methoxyphenyl)-4H-chromen-4-one          | C17H14O5     | 297.0745895 | No  |
| 4619 | HMDB0130392                       | 8-hydroxy-7-methoxy-3-(3-methoxyphenyl)-4H-chromen-4-one          | C17H14O5     | 297.0745895 | No  |
| 4619 | HMDB0130396                       | 5-hydroxy-7-methoxy-3-(3-methoxyphenyl)-4H-chromen-4-one          | C17H14O5     | 297.0745895 | No  |
| 4619 | HMDB0130763                       | 6-hydroxy-5,7-dimethoxy-3-phenyl-4H-chromen-4-one                 | C17H14O5     | 297.0745895 | No  |
| 4619 | HMDB0130767                       | 3-(4-hydroxyphenyl)-5,7-dimethoxy-4H-chromen-4-one                | C17H14O5     | 297.0745895 | No  |
| 4619 | HMDB0130900                       | 2-(2-hydroxyphenyl)-5,6-dimethoxy-4H-chromen-4-one                | C17H14O5     | 297.0745895 | No  |
| 4619 | HMDB0132452                       | 2-(4-hydroxyphenyl)-5,7-dimethoxy-4H-chromen-4-one                | C17H14O5     | 297.0745895 | No  |
| 4619 | HMDB0132453                       | 7-hydroxy-5-methoxy-2-(4-methoxyphenyl)-4H-chromen-4-one          | C17H14O5     | 297.0745895 | No  |
| 4619 | HMDB0132454                       | 5-hydroxy-7-methoxy-2-(4-methoxyphenyl)-4H-chromen-4-one          | C17H14O5     | 297.0745895 | No  |
| 4619 | HMDB0132849                       | 7-hydroxy-6-methoxy-3-(4-methoxyphenyl)-4H-chromen-4-one          | C17H14O5     | 297.0745895 | No  |
| 4619 | HMDB0140449                       | 2-(4-hydroxy-3,5-dimethoxyphenyl)-4H-chromen-4-one                | C17H14O5     | 297.0745895 | No  |
| 4619 | HMDB0140450                       | 2-(3-hydroxy-4,5-dimethoxyphenyl)-4H-chromen-4-one                | C17H14O5     | 297.0745895 | No  |
| 4619 | HMDB0140455                       | 2-(3,5-dimethoxyphenyl)-7-hydroxy-4H-chromen-4-one                | C17H14O5     | 297.0745895 | No  |
| 4621 | HMDB0010350; C03033               | 2-Phenylethanol glucuronide                                       | C14H18O7     | 297.0984896 | Yes |
| 4621 | HMDB0124996                       | 6-(3-ethylphenoxy)-3,4,5-trihydroxyoxane-2-carboxylic acid        | C14H18O7     | 297.0984896 | Yes |
| 4621 | HMDB0125173                       | 6-(4-ethylphenoxy)-3,4,5-trihydroxyoxane-2-carboxylic acid        | C14H18O7     | 297.0984896 | Yes |
| 4622 | HMDB0004808; CHEBI:89489          | 7C-aglycone                                                       | C18H18O4     | 297.1138639 | No  |
| 4622 | HMDB0006101; CHEBI:562788         | Enterolactone                                                     | C18H18O4     | 297.1138639 | No  |
| 4622 | HMDB0029543                       | (+)-Ligballinol                                                   | C18H18O4     | 297.1138639 | No  |
| 4622 | HMDB0030695                       | 7-Hydroxy-5-methoxy-6,8-dimethylflavanone                         | C18H18O4     | 297.1138639 | No  |
| 4622 | HMDB0037376; CHEBI:70658          | 1-(2,4-Dihydroxy-6-methoxy-3,5-dimethylphenyl)-3-phenyl           | C18H18O4     | 297.1138639 | No  |
| 4622 | HMDB0038453                       | 5,7-Dimethoxy-6-methylflavanone                                   | C18H18O4     | 297.1138639 | No  |
| 4622 | HMDB0131379                       | 4-[5-(3-hydroxypropyl)-1-benzofuran-2-yl]-2-methoxyphenol         | C18H18O4     | 297.1138639 | No  |
| 4623 | HMDB0036159                       | Toxin T2 tetrol                                                   | C15H22O6     | 297.1350897 | Yes |
| 4623 | HMDB0037560                       | 3,7,8,15-Scirpenetetrol                                           | C15H22O6     | 297.1350897 | Yes |
| 4624 | HMDB0015376; C07172; CHEBI:157833 | Trimeprazine                                                      | C18H22N2S    | 297.1456897 | Yes |
| 4624 | HMDB0035233                       | Olomoucine                                                        | C15H18N6O    | 297.1456897 | Yes |
| 4627 | HMDB0014943; CHEBI:51038          | Minaprine                                                         | C17H22N4O    | 297.1711773 | Yes |
| 4627 | HMDB0015643; CHEBI:195280         | Artemether                                                        | C16H26O5     | 297.1711773 | Yes |
| 4627 | HMDB0061061                       | 9''-desmethylgranisetron                                          | C17H22N4O    | 297.1711773 | Yes |

|      |                                   |                                                          |             |             |     |
|------|-----------------------------------|----------------------------------------------------------|-------------|-------------|-----|
| 4628 | HMDB0060473; CHEBI:15949          | Diphthamide                                              | C13H24N5O3  | 297.1816362 | Yes |
| 4630 | HMDB0010736; CHEBI:50576          | 3-Oxo-octadecanoic acid                                  | C18H34O3    | 297.2437323 | No  |
| 4630 | HMDB0030979                       | 9-Oxo-octadecanoic acid                                  | C18H34O3    | 297.2437323 | No  |
| 4630 | HMDB0030980                       | 10-Oxo-octadecanoic acid                                 | C18H34O3    | 297.2437323 | No  |
| 4630 | HMDB0030981                       | 11-Oxo-octadecanoic acid                                 | C18H34O3    | 297.2437323 | No  |
| 4630 | HMDB0031127                       | 5-Hexyltetrahydro-2-furanoctanoic acid                   | C18H34O3    | 297.2437323 | No  |
| 4630 | HMDB0034074                       | 5-Oxo-octadecanoic acid                                  | C18H34O3    | 297.2437323 | No  |
| 4630 | HMDB0034297; C08365; CHEBI:28592  | Ricinoleic acid                                          | C18H34O3    | 297.2437323 | No  |
| 4630 | HMDB0061650; CHEBI:85661          | 9,10-epoxyoctadecanoic acid                              | C18H34O3    | 297.2437323 | No  |
| 4631 | HMDB0000772; C16535; CHEBI:39246  | Nonadecanoic acid                                        | C19H38O2    | 297.2798    | No  |
| 4631 | HMDB0000795; CHEBI:51340          | Pristanic acid                                           | C19H38O2    | 297.2798    | No  |
| 4631 | HMDB0004085; C16794               | Tuberculostearic acid                                    | C19H38O2    | 297.2798    | No  |
| 4631 | HMDB0034154                       | Methyl stearate                                          | C19H38O2    | 297.2798    | No  |
| 4631 | HMDB0035474; CHEBI:31731          | Isopropyl hexadecanoate                                  | C19H38O2    | 297.2798    | No  |
| 4631 | HMDB0035674                       | 4-Hydroxy-6-nonadecanone                                 | C19H38O2    | 297.2798    | No  |
| 4631 | HMDB0035675                       | 6-Hydroxy-4-nonadecanone                                 | C19H38O2    | 297.2798    | No  |
| 4631 | HMDB0037397; CHEBI:133136         | xi-17-Methyloctadecanoic acid                            | C19H38O2    | 297.2798    | No  |
| 4631 | HMDB0038070; CHEBI:84875          | xi-16-Methyloctadecanoic acid                            | C19H38O2    | 297.2798    | No  |
| 4654 | HMDB0013300                       | Pentadecanoylglycine                                     | C17H33NO3   | 298.2393685 | No  |
| 4656 | HMDB0000252; C00319; CHEBI:16393  | Sphingosine                                              | C18H37NO2   | 298.2756091 | No  |
| 4656 | HMDB0001480; C02934; CHEBI:17862  | 3-Dehydrosphinganine                                     | C18H37NO2   | 298.2756091 | No  |
| 4656 | HMDB0002100; C16512; CHEBI:147261 | Palmitoylethanolamide                                    | C18H37NO2   | 298.2756091 | No  |
| 4671 | HMDB0128440                       | 13,14,15-trihydroxy-9-oxo-8,17-dioxatetracyclo[8.7.0.0.1 | C15H8O7     | 299.0175049 | Yes |
| 4671 | HMDB0128443                       | 5,13,14,15-tetrahydroxy-8,17-dioxatetracyclo[8.7.0.0.2   | C15H8O7     | 299.0175049 | Yes |
| 4671 | HMDB0128447                       | 5,6,13,14-tetrahydroxy-8,17-dioxatetracyclo[8.7.0.0.2    | C15H8O7     | 299.0175049 | Yes |
| 4671 | HMDB0128451                       | 5,12,13,14-tetrahydroxy-8,17-dioxatetracyclo[8.7.0.0.2   | C15H8O7     | 299.0175049 | Yes |
| 4671 | HMDB0128455                       | 3,5,13,14-tetrahydroxy-8,17-dioxatetracyclo[8.7.0.0.2    | C15H8O7     | 299.0175049 | Yes |
| 4672 | HMDB0041849                       | Carboxytolbutamide                                       | C12H16N2O5S | 299.0714004 | No  |
| 4674 | HMDB0013938                       | Promazine 5-sulfoxide                                    | C17H20N2OS  | 299.1212671 | Yes |
| 4709 | HMDB0000781; C16265               | N-Acetylgalactosamine 4-sulphate                         | C8H15NO9S   | 300.0396237 | No  |
| 4709 | HMDB0000814; C04132; CHEBI:28132  | N-Acetylglucosamine 6-sulfate                            | C8H15NO9S   | 300.0396237 | No  |
| 4709 | HMDB0000841                       | N-Acetylgalactosamine 6-sulfate                          | C8H15NO9S   | 300.0396237 | No  |
| 4745 | HMDB0060031; CHEBI:89538          | 5-(3",5"-Dihydroxyphenyl)-gamma-valerolactone-O-su       | C12H14O7S   | 301.0400383 | Yes |
| 4745 | HMDB0127769                       | {2-methoxy-4-[(5-oxoxolan-2-yl)methyl]phenyl}oxidar      | C12H14O7S   | 301.0400383 | Yes |
| 4745 | HMDB0127831                       | {2-methoxy-5-[(5-oxoxolan-2-yl)methyl]phenyl}oxidar      | C12H14O7S   | 301.0400383 | Yes |
| 4747 | HMDB0060017; CHEBI:89612          | Pyrogallol-2-O-glucuronide                               | C12H14O9    | 301.0566906 | Yes |
| 4747 | HMDB0125508                       | 6-(2,4-dihydroxyphenoxy)-3,4,5-trihydroxyoxane-2-car     | C12H14O9    | 301.0566906 | Yes |
| 4747 | HMDB0125509                       | 6-(2,5-dihydroxyphenoxy)-3,4,5-trihydroxyoxane-2-car     | C12H14O9    | 301.0566906 | Yes |
| 4747 | HMDB0125510                       | 6-(3,4-dihydroxyphenoxy)-3,4,5-trihydroxyoxane-2-car     | C12H14O9    | 301.0566906 | Yes |
| 4747 | HMDB0125511                       | 6-(2,6-dihydroxyphenoxy)-3,4,5-trihydroxyoxane-2-car     | C12H14O9    | 301.0566906 | Yes |
| 4747 | HMDB0125512                       | 6-(2,3-dihydroxyphenoxy)-3,4,5-trihydroxyoxane-2-car     | C12H14O9    | 301.0566906 | Yes |
| 4752 | HMDB0028708                       | Arginyl-Glutamate                                        | C11H20N5O5  | 301.1413108 | Yes |
| 4754 | HMDB0028707                       | Arginyl-Glutamine                                        | C11H22N6O4  | 301.1630409 | Yes |
| 4754 | HMDB0028723                       | Arginyl-Gamma-glutamate                                  | C11H22N6O4  | 301.1630409 | Yes |
| 4754 | HMDB0028791                       | Glutaminyllarginine                                      | C11H22N6O4  | 301.1630409 | Yes |
| 4756 | HMDB0015216; C07785; CHEBI:4779   | Emedastine                                               | C17H26N4O   | 301.2032158 | Yes |
| 4780 | HMDB0013240; CHEBI:70811          | Indoleacetyl glutamine                                   | C15H17N3O4  | 302.114389  | Yes |
| 4782 | HMDB0003573; C01851; CHEBI:16794  | Scopolamine                                              | C17H21NO4   | 302.1403068 | No  |
| 4782 | HMDB0015043; C01416; CHEBI:27958  | Cocaine                                                  | C17H21NO4   | 302.1403068 | No  |
| 4782 | HMDB0015405; CHEBI:149226         | Fenoterol                                                | C17H21NO4   | 302.1403068 | No  |
| 4782 | HMDB0060543                       | 6-Hydroxyetodolac                                        | C17H21NO4   | 302.1403068 | No  |
| 4782 | HMDB0060544                       | 7-Hydroxyetodolac                                        | C17H21NO4   | 302.1403068 | No  |
| 4782 | HMDB0061074                       | alpha-noroxycodol                                        | C17H21NO4   | 302.1403068 | No  |
| 4782 | HMDB0061075                       | beta-noroxycodol                                         | C17H21NO4   | 302.1403068 | No  |
| 4782 | HMDB0061076                       | beta-oxymorphol                                          | C17H21NO4   | 302.1403068 | No  |
| 4798 | HMDB0059985; CHEBI:88701          | 5-(3",4",5"-Trihydroxyphenyl)-gamma-valerolactone-3      | C11H12O8S   | 303.0164851 | Yes |
| 4798 | HMDB0059987; CHEBI:88693          | 5-(3",4",5"-Trihydroxyphenyl)-gamma-valerolactone-4      | C11H12O8S   | 303.0164851 | Yes |
| 4798 | HMDB0060020; CHEBI:89552          | Sinapinic acid-O-sulphate                                | C11H12O8S   | 303.0164851 | Yes |
| 4798 | HMDB0128711                       | {[3-(6-hydroxy-7-methoxy-2H-1,3-benzodioxol-5-yl)prc     | C11H12O8S   | 303.0164851 | Yes |
| 4798 | HMDB0128713                       | {[3-(7-hydroxy-6-methoxy-2H-1,3-benzodioxol-5-yl)prc     | C11H12O8S   | 303.0164851 | Yes |
| 4801 | HMDB0040631                       | Pratenol B                                               | C15H12O7    | 303.0498166 | Yes |



|      |                                   |                                                                 |             |     |
|------|-----------------------------------|-----------------------------------------------------------------|-------------|-----|
| 4801 | HMDB0125017                       | 6,7-dihydroxy-3-(2,4,5-trihydroxyphenyl)-3,4-dihydro-; C15H12O7 | 303.0498166 | Yes |
| 4801 | HMDB0125208                       | 2-(3,5-dihydroxyphenyl)-3,5,7-trihydroxy-3,4-dihydro-; C15H12O7 | 303.0498166 | Yes |
| 4801 | HMDB0125211                       | 3-(3,5-dihydroxyphenyl)-1-(2,4,6-trihydroxyphenyl)pro C15H12O7  | 303.0498166 | Yes |
| 4801 | HMDB0125220                       | 3,5,6,7-tetrahydroxy-2-(3-hydroxyphenyl)-3,4-dihydro- C15H12O7  | 303.0498166 | Yes |
| 4801 | HMDB0125366                       | 3,5,6,7-tetrahydroxy-2-(4-hydroxyphenyl)-3,4-dihydro- C15H12O7  | 303.0498166 | Yes |
| 4801 | HMDB0125368                       | 3-(4-hydroxyphenyl)-1-(2,3,4,6-tetrahydroxyphenyl)pr C15H12O7   | 303.0498166 | Yes |
| 4801 | HMDB0125371                       | 2-(3,4-dihydroxyphenyl)-3,5,7-trihydroxy-3,4-dihydro-; C15H12O7 | 303.0498166 | Yes |
| 4801 | HMDB0125372                       | 3-(3,4-dihydroxyphenyl)-1-(2,4,6-trihydroxyphenyl)pro C15H12O7  | 303.0498166 | Yes |
| 4801 | HMDB0126023                       | 2-(3,4-dihydroxyphenyl)-5,6,7-trihydroxy-3,4-dihydro-; C15H12O7 | 303.0498166 | Yes |
| 4801 | HMDB0126025                       | (2E)-3-(3,4-dihydroxyphenyl)-1-(2,3,4,6-tetrahydroxypl C15H12O7 | 303.0498166 | Yes |
| 4801 | HMDB0126029                       | 5,7-dihydroxy-2-(2,3,4-trihydroxyphenyl)-3,4-dihydro-; C15H12O7 | 303.0498166 | Yes |
| 4801 | HMDB0126030                       | (2E)-3-(2,3,4-trihydroxyphenyl)-1-(2,4,6-trihydroxyphe C15H12O7 | 303.0498166 | Yes |
| 4801 | HMDB0126033                       | 5,7-dihydroxy-2-(3,4,5-trihydroxyphenyl)-3,4-dihydro-; C15H12O7 | 303.0498166 | Yes |
| 4801 | HMDB0126035                       | (2E)-1-(2,4,6-trihydroxyphenyl)-3-(3,4,5-trihydroxyphe C15H12O7 | 303.0498166 | Yes |
| 4801 | HMDB0126039                       | 5,7-dihydroxy-2-(2,4,5-trihydroxyphenyl)-3,4-dihydro-; C15H12O7 | 303.0498166 | Yes |
| 4801 | HMDB0126040                       | (2E)-3-(2,4,5-trihydroxyphenyl)-1-(2,4,6-trihydroxyphe C15H12O7 | 303.0498166 | Yes |
| 4801 | HMDB0126565                       | 3-(3-hydroxyphenyl)-1-(2,3,4,6-tetrahydroxyphenyl)pr C15H12O7   | 303.0498166 | Yes |
| 4801 | HMDB0128217                       | 1-(2,4,6-trihydroxyphenyl)-3-(3,4,5-trihydroxyphenyl)p C15H12O7 | 303.0498166 | Yes |
| 4801 | HMDB0129344                       | 3-(3,4-dihydroxyphenyl)-5,6,7-trihydroxy-3,4-dihydro-; C15H12O7 | 303.0498166 | Yes |
| 4801 | HMDB0129353                       | 5,7-dihydroxy-3-(2,3,4-trihydroxyphenyl)-3,4-dihydro-; C15H12O7 | 303.0498166 | Yes |
| 4801 | HMDB0129359                       | 5,7-dihydroxy-3-(2,4,5-trihydroxyphenyl)-3,4-dihydro-; C15H12O7 | 303.0498166 | Yes |
| 4801 | HMDB0130177                       | 5,6,7,8-tetrahydroxy-2-(4-hydroxyphenyl)-3,4-dihydro- C15H12O7  | 303.0498166 | Yes |
| 4801 | HMDB0130180                       | 3-(4-hydroxyphenyl)-1-(2,3,4,5,6-pentahydroxyphenyl) C15H12O7   | 303.0498166 | Yes |
| 4801 | HMDB0130332                       | 3-(3,4-dihydroxyphenyl)-1-(2,3,4,6-tetrahydroxypheny C15H12O7   | 303.0498166 | Yes |
| 4801 | HMDB0131756                       | 2-(2,4-dihydroxyphenyl)-3,5,7-trihydroxy-3,4-dihydro-; C15H12O7 | 303.0498166 | Yes |
| 4801 | HMDB0131926                       | 2-(3,5-dihydroxyphenyl)-5,6,7-trihydroxy-3,4-dihydro-; C15H12O7 | 303.0498166 | Yes |
| 4801 | HMDB0133541                       | 2,4,5,6-tetrahydroxy-2-[(4-hydroxyphenyl)methyl]-2,3- C15H12O7  | 303.0498166 | Yes |
| 4801 | HMDB0133542                       | 2,4,6-trihydroxy-2-[hydroxy(4-hydroxyphenyl)methyl]- C15H12O7   | 303.0498166 | Yes |
| 4801 | HMDB0133543                       | 2-[(3,4-dihydroxyphenyl)methyl]-2,4,6-trihydroxy-2,3- C15H12O7  | 303.0498166 | Yes |
| 4801 | HMDB0137814                       | 3-(2,4-dihydroxyphenyl)-5,7,8-trihydroxy-3,4-dihydro-; C15H12O7 | 303.0498166 | Yes |
| 4802 | HMDB0125817                       | (5-hydroxy-7-methoxy-2,2-dimethyl-3,4-dihydro-2H-1- C12H16O7S   | 303.0543161 | Yes |
| 4802 | HMDB0127785                       | 5-(3-methoxyphenyl)-4-(sulfooxy)pentanoic acid C12H16O7S        | 303.0543161 | Yes |
| 4802 | HMDB0127792                       | 5-[3-methoxy-4-(sulfooxy)phenyl]pentanoic acid C12H16O7S        | 303.0543161 | Yes |
| 4804 | HMDB0032943; C14324; CHEBI:34682  | Diazinon C12H21N2O3PS                                           | 303.0965262 | No  |
| 4804 | HMDB0034073; C08437               | Vicine C10H16N4O7                                               | 303.0965262 | No  |
| 4804 | HMDB0038665; CHEBI:136547         | L-N-(1H-Indol-3-ylacetyl)glutamic acid C15H16N2O5               | 303.0965262 | No  |
| 4808 | HMDB0006353; C00110               | Dolichol phosphate (C5H8)nC10H21O4l                             | 303.1714564 | No  |
| 4810 | HMDB0000309                       | 3a,16b-Dihydroxyandrostene C19H28O3                             | 303.1947626 | No  |
| 4810 | HMDB0000322                       | 16-Oxoandrostenediol C19H28O3                                   | 303.1947626 | No  |
| 4810 | HMDB0000324                       | 3a,16a-Dihydroxyandrostene C19H28O3                             | 303.1947626 | No  |
| 4810 | HMDB0000352; C05139; CHEBI:27771  | 16a-Hydroxydehydroisoandrosterone C19H28O3                      | 303.1947626 | No  |
| 4810 | HMDB0000388                       | 3a,16-Dihydroxyandrostene C19H28O3                              | 303.1947626 | No  |
| 4810 | HMDB0003956; C05291               | 7a-Hydroxytestosterone C19H28O3                                 | 303.1947626 | No  |
| 4810 | HMDB0004611; C18045; CHEBI:712194 | 7a-Hydroxydehydroepiandrosterone C19H28O3                       | 303.1947626 | No  |
| 4810 | HMDB0004624; CHEBI:712193         | 7b-Hydroxydehydroepiandrosterone C19H28O3                       | 303.1947626 | No  |
| 4810 | HMDB0006031; C14552               | 11-Ketoetiocolanolone C19H28O3                                  | 303.1947626 | No  |
| 4810 | HMDB0006259; C14497; CHEBI:34477  | 6beta-Hydroxytestosterone C19H28O3                              | 303.1947626 | No  |
| 4810 | HMDB0006769; C05294               | 19-Hydroxytestosterone C19H28O3                                 | 303.1947626 | No  |
| 4810 | HMDB0012533                       | 11beta-Hydroxytestosterone C19H28O3                             | 303.1947626 | No  |
| 4810 | HMDB0012654                       | 2beta-Hydroxytestosterone C19H28O3                              | 303.1947626 | No  |
| 4810 | HMDB0031464                       | cis-[8]-Shogaol C19H28O3                                        | 303.1947626 | No  |
| 4810 | HMDB0039589                       | Ginsenoside G C19H28O3                                          | 303.1947626 | No  |
| 4810 | HMDB0039735                       | 10-Acetoxy-8-heptadecene-4,6-diyn-3-ol C19H28O3                 | 303.1947626 | No  |
| 4810 | HMDB0060089; CHEBI:798            | w Hydroxy testosterone C19H28O3                                 | 303.1947626 | No  |
| 4810 | HMDB0060339; C18075; CHEBI:607670 | 11beta,17beta-Dihydroxy-4-androsten-3-one C19H28O3              | 303.1947626 | No  |
| 4812 | HMDB0001043; C00219; CHEBI:15843  | Arachidonic acid C20H32O2                                       | 303.2328632 | No  |
| 4812 | HMDB0002177; CHEBI:71488          | Cis-8,11,14,17-Eicosatetraenoic acid C20H32O2                   | 303.2328632 | No  |
| 4812 | HMDB0006036; D04947; CHEBI:529213 | Mesterolone C20H32O2                                            | 303.2328632 | No  |
| 4812 | HMDB0014996; C14605; CHEBI:34838  | Drostanolone C20H32O2                                           | 303.2328632 | No  |
| 4812 | HMDB0036702                       | Sideridiol C20H32O2                                             | 303.2328632 | No  |
| 4812 | HMDB0036721                       | ent-17-Hydroxy-16beta-kauran-19-al C20H32O2                     | 303.2328632 | No  |

|      |                                  |                                                                                                                    |            |             |     |
|------|----------------------------------|--------------------------------------------------------------------------------------------------------------------|------------|-------------|-----|
| 4812 | HMDB0036754                      | Yucalexin P21                                                                                                      | C20H32O2   | 303.2328632 | No  |
| 4812 | HMDB0036829                      | Copalic acid                                                                                                       | C20H32O2   | 303.2328632 | No  |
| 4812 | HMDB0036830                      | Junicedral                                                                                                         | C20H32O2   | 303.2328632 | No  |
| 4812 | HMDB0037824                      | 7,13-Eperudien-15-oic acid                                                                                         | C20H32O2   | 303.2328632 | No  |
| 4812 | HMDB0039687                      | Oryzaalexin S                                                                                                      | C20H32O2   | 303.2328632 | No  |
| 4812 | HMDB0039702; CHEBI:78259         | Oryzaalexin E                                                                                                      | C20H32O2   | 303.2328632 | No  |
| 4812 | HMDB0060102                      | Arachidonate                                                                                                       | C20H32O2   | 303.2328632 | No  |
| 4827 | HMDB0011691                      | Cytidine 2'',3''-cyclic phosphate                                                                                  | C9H12N3O7P | 304.0341687 | No  |
| 4827 | HMDB0062545                      | 2''-deoxycytidine 3''-monophosphate                                                                                | C9H12N3O7P | 304.0341687 | No  |
| 4830 | HMDB0034364                      | Cepharadione A                                                                                                     | C18H11NO4  | 304.0591688 | No  |
| 4831 | HMDB0034364                      | Cepharadione A                                                                                                     | C18H11NO4  | 304.0634121 | No  |
| 4838 | HMDB0002227; C06866; CHEBI:3374  | Capsaicin                                                                                                          | C18H27NO3  | 304.1921018 | No  |
| 4855 | HMDB0059978                      | 4-Hydroxy-5-(dihydroxyphenyl)-valeric acid-O-sulphate                                                              | C11H14O8S  | 305.0340414 | Yes |
| 4855 | HMDB0059979                      | 4-Hydroxy-5-(dihydroxyphenyl)-valeric acid-O-sulphate                                                              | C11H14O8S  | 305.0340414 | Yes |
| 4855 | HMDB0127746                      | 4-hydroxy-5-[4-hydroxy-3-(sulfooxy)phenyl]pentanoic acid                                                           | C11H14O8S  | 305.0340414 | Yes |
| 4855 | HMDB0127747                      | 5-(3,4-dihydroxyphenyl)-4-(sulfooxy)pentanoic acid                                                                 | C11H14O8S  | 305.0340414 | Yes |
| 4855 | HMDB0128720                      | {[3-(4,5-dihydroxy-2,3-dimethoxyphenyl)prop-2-en-1-yl]}                                                            | C11H14O8S  | 305.0340414 | Yes |
| 4862 | HMDB0035781                      | Naematolone                                                                                                        | C17H22O5   | 305.1397117 | No  |
| 4862 | HMDB0036487                      | Achillicin                                                                                                         | C17H22O5   | 305.1397117 | No  |
| 4862 | HMDB0036643; C09499              | Matricin                                                                                                           | C17H22O5   | 305.1397117 | No  |
| 4862 | HMDB0134974                      | 3,4-dihydroxy-2-(4-hydroxy-3,7-dimethylocta-2,6-dien-1-yl)-3,4,6-trihydroxybenzoic acid                            | C17H22O5   | 305.1397117 | No  |
| 4862 | HMDB0134975                      | 3,4-dihydroxy-2-[(2Z)-4-hydroxy-3-(4-methylpent-3-en-1-yl)-5-hydroxy-2-methoxyphenyl]-3,4,6-trihydroxybenzoic acid | C17H22O5   | 305.1397117 | No  |
| 4862 | HMDB0134976                      | 3,4-dihydroxy-2-(8-hydroxy-3,7-dimethylocta-2,6-dien-1-yl)-3,4,6-trihydroxybenzoic acid                            | C17H22O5   | 305.1397117 | No  |
| 4862 | HMDB0134977                      | 3,4-dihydroxy-2-[(6E)-8-hydroxy-3,7-dimethylocta-2,6-dien-1-yl]-3,4,6-trihydroxybenzoic acid                       | C17H22O5   | 305.1397117 | No  |
| 4862 | HMDB0134979                      | 3,4-dihydroxy-2-(5-hydroxy-3,7-dimethylocta-2,6-dien-1-yl)-3,4,6-trihydroxybenzoic acid                            | C17H22O5   | 305.1397117 | No  |
| 4862 | HMDB0134980                      | 3,4-dihydroxy-2-[(3-methyl-3-(4-methylpent-3-en-1-yl)-5-hydroxy-2-methoxyphenyl)]-3,4,6-trihydroxybenzoic acid     | C17H22O5   | 305.1397117 | No  |
| 4862 | HMDB0134982                      | 2-(3,7-dimethylocta-2,6-dien-1-yl)-3,4,6-trihydroxybenzoic acid                                                    | C17H22O5   | 305.1397117 | No  |
| 4865 | HMDB0031315                      | 1-(beta-D-Glucopyranosyloxy)-3-octanone                                                                            | C14H26O7   | 305.1609811 | Yes |
| 4865 | HMDB0037107; C18325; CHEBI:75544 | N1-trans-Feruloylagmatine                                                                                          | C15H22N4O3 | 305.1609811 | Yes |
| 4866 | HMDB0012799                      | 5''-Carboxy-gamma-chromanol                                                                                        | C18H26O4   | 305.1736542 | No  |
| 4866 | HMDB0034780; C20203              | Capsiate                                                                                                           | C18H26O4   | 305.1736542 | No  |
| 4868 | HMDB0000523                      | 5-Androstene-3b,16b,17a-triol                                                                                      | C19H30O3   | 305.2124619 | No  |
| 4868 | HMDB0000540                      | 5-Androstene-3b,16a,17a-triol                                                                                      | C19H30O3   | 305.2124619 | No  |
| 4868 | HMDB0000550                      | 5-Androstenetriol                                                                                                  | C19H30O3   | 305.2124619 | No  |
| 4868 | HMDB0002984; C14606              | 11-Hydroxyandrosterone                                                                                             | C19H30O3   | 305.2124619 | No  |
| 4868 | HMDB0013156                      | 16-alpha-Hydroxyandrosterone                                                                                       | C19H30O3   | 305.2124619 | No  |
| 4868 | HMDB0013199                      | 5-Androstene-3alpha-16b,17b-triol                                                                                  | C19H30O3   | 305.2124619 | No  |
| 4868 | HMDB0014759; C07346; CHEBI:7820  | Oxandrolone                                                                                                        | C19H30O3   | 305.2124619 | No  |
| 4868 | HMDB0040640                      | [8]-Paradol                                                                                                        | C19H30O3   | 305.2124619 | No  |
| 4869 | HMDB0000523                      | 5-Androstene-3b,16b,17a-triol                                                                                      | C19H30O3   | 305.2147157 | No  |
| 4869 | HMDB0000540                      | 5-Androstene-3b,16a,17a-triol                                                                                      | C19H30O3   | 305.2147157 | No  |
| 4869 | HMDB0000550                      | 5-Androstenetriol                                                                                                  | C19H30O3   | 305.2147157 | No  |
| 4869 | HMDB0002984; C14606              | 11-Hydroxyandrosterone                                                                                             | C19H30O3   | 305.2147157 | No  |
| 4869 | HMDB0013156                      | 16-alpha-Hydroxyandrosterone                                                                                       | C19H30O3   | 305.2147157 | No  |
| 4869 | HMDB0013199                      | 5-Androstene-3alpha-16b,17b-triol                                                                                  | C19H30O3   | 305.2147157 | No  |
| 4869 | HMDB0014759; C07346; CHEBI:7820  | Oxandrolone                                                                                                        | C19H30O3   | 305.2147157 | No  |
| 4869 | HMDB0040640                      | [8]-Paradol                                                                                                        | C19H30O3   | 305.2147157 | No  |
| 4870 | HMDB0002925; C03242; CHEBI:53486 | 8,11,14-Eicosatrienoic acid                                                                                        | C20H34O2   | 305.2484254 | No  |
| 4870 | HMDB0010378; CHEBI:1306412       | 5,8,11-Eicosatrienoic acid                                                                                         | C20H34O2   | 305.2484254 | No  |
| 4870 | HMDB0031058                      | Sciadonic acid                                                                                                     | C20H34O2   | 305.2484254 | No  |
| 4870 | HMDB0036835                      | Sagittariol                                                                                                        | C20H34O2   | 305.2484254 | No  |
| 4870 | HMDB0060039; C16522; CHEBI:53460 | 11,14,17-Eicosatrienoic acid                                                                                       | C20H34O2   | 305.2484254 | No  |
| 4909 | HMDB0001409; C00365; CHEBI:17622 | dUMP                                                                                                               | C9H13N2O8P | 307.032954  | Yes |
| 4911 | HMDB0033627                      | D-Erythroascorbic acid 1''-a-D-glucoside                                                                           | C11H16O10  | 307.0679569 | Yes |
| 4912 | HMDB0040692                      | 4R,5R,6S-Trihydroxy-2-hydroxymethyl-2-cyclohexen-1-ol                                                              | C15H16O7   | 307.0829981 | No  |
| 4912 | HMDB0128179                      | 4-[3-(3,4-dihydroxyphenyl)-2-hydroxypropyl]benzene                                                                 | C15H16O7   | 307.0829981 | No  |
| 4912 | HMDB0128184                      | 5-[2-hydroxy-3-(2,4,6-trihydroxyphenyl)propyl]benzene                                                              | C15H16O7   | 307.0829981 | No  |
| 4912 | HMDB0141543                      | 5-[2-hydroxy-3-(2,4,6-trihydroxyphenyl)propyl]benzene                                                              | C15H16O7   | 307.0829981 | No  |
| 4914 | HMDB0037772                      | 8-Acetyllegelolide                                                                                                 | C16H20O6   | 307.1186871 | Yes |
| 4914 | HMDB0094647; CHEBI:132611        | Mono-(2-ethyl-5-carboxypentyl) phthalate                                                                           | C16H20O6   | 307.1186871 | Yes |
| 4916 | HMDB0060990                      | 8-Hydroxycarteolol                                                                                                 | C16H24N2O4 | 307.1665972 | Yes |

|      |                                   |                                                                  |             |             |     |
|------|-----------------------------------|------------------------------------------------------------------|-------------|-------------|-----|
| 4919 | HMDB0005060; C16525; CHEBI:603631 | Eicosadienoic acid                                               | C20H36O2    | 307.2647777 | No  |
| 4919 | HMDB0036827; C09183; CHEBI:9053   | Sclareol                                                         | C20H36O2    | 307.2647777 | No  |
| 4919 | HMDB0061864                       | Dihomo-linoleate (20:2n6)                                        | C20H36O2    | 307.2647777 | No  |
| 4919 | HMDB0062432; CHEBI:78706          | 8Z,11Z-eicosadienoic acid                                        | C20H36O2    | 307.2647777 | No  |
| 4939 | HMDB0015461; CHEBI:1178587        | Glycodiazine                                                     | C13H15N3O4S | 308.0715196 | No  |
| 4940 | HMDB0010319; C03033               | Inodxyl glucuronide                                              | C14H15NO7   | 308.0778533 | No  |
| 4940 | HMDB0040830                       | N-Feruloylaspartic acid                                          | C14H15NO7   | 308.0778533 | No  |
| 4940 | HMDB0059804                       | Indoxyl glucuronide                                              | C14H15NO7   | 308.0778533 | No  |
| 4941 | HMDB0033359                       | Cryptodrine                                                      | C18H15NO4   | 308.0930948 | No  |
| 4941 | HMDB0038584                       | Piperolactam C                                                   | C18H15NO4   | 308.0930948 | No  |
| 4944 | HMDB0028809                       | Glutaminyltyrosine                                               | C14H19N3O5  | 308.1264898 | Yes |
| 4944 | HMDB0029103                       | Tyrosyl-Glutamine                                                | C14H19N3O5  | 308.1264898 | Yes |
| 4944 | HMDB0029119                       | Tyrosyl-Gamma-glutamate                                          | C14H19N3O5  | 308.1264898 | Yes |
| 4944 | HMDB0030207                       | Koenigine                                                        | C19H19NO3   | 308.1264898 | Yes |
| 4947 | HMDB0014484; CHEBI:51024          | Metixene                                                         | C20H23NS    | 308.1485998 | Yes |
| 4949 | HMDB0028963                       | Lysyl-Tyrosine                                                   | C15H23N3O4  | 308.1596899 | Yes |
| 4949 | HMDB0029110                       | Tyrosyl-Lysine                                                   | C15H23N3O4  | 308.1596899 | Yes |
| 4977 | HMDB0129951                       | {3-[2-(3,5-dihydroxyphenyl)ethyl]phenyl}oxidanesulfor            | C14H14O6S   | 309.0438142 | No  |
| 4984 | HMDB0031060                       | (R)-2-Hydroxysterculic acid                                      | C19H34O3    | 309.2438238 | No  |
| 4985 | HMDB0002231; C16526; CHEBI:32425  | Eicosenoic acid                                                  | C20H38O2    | 309.279886  | No  |
| 4985 | HMDB0034296                       | 11-Eicosenoic acid                                               | C20H38O2    | 309.279886  | No  |
| 4985 | HMDB0034451; C03425               | Ethyl oleate                                                     | C20H38O2    | 309.279886  | No  |
| 4985 | HMDB0035159; CHEBI:134479         | Paullinic acid                                                   | C20H38O2    | 309.279886  | No  |
| 4985 | HMDB0035572; CHEBI:134474         | 6,8-Icosanedione                                                 | C20H38O2    | 309.279886  | No  |
| 4985 | HMDB0035573; CHEBI:134475         | 5,7-Icosanedione                                                 | C20H38O2    | 309.279886  | No  |
| 4985 | HMDB0035574                       | 4,6-Icosanedione                                                 | C20H38O2    | 309.279886  | No  |
| 4985 | HMDB0037127                       | Oleyl acetate                                                    | C20H38O2    | 309.279886  | No  |
| 4985 | HMDB0062436; CHEBI:32419          | 9Z-eicosenoic acid                                               | C20H38O2    | 309.279886  | No  |
| 5001 | HMDB0001961                       | 1,7-Dimethylguanosine                                            | C12H17N5O5  | 310.1155142 | No  |
| 5001 | HMDB0004824; CHEBI:19289          | N2,N2-Dimethylguanosine                                          | C12H17N5O5  | 310.1155142 | No  |
| 5002 | HMDB0028711                       | Arginyl-Histidine                                                | C12H21N7O3  | 310.1641007 | No  |
| 5002 | HMDB0028879                       | HistidinyI-Arginine                                              | C12H21N7O3  | 310.1641007 | No  |
| 5031 | HMDB0130051                       | {[(3E)-4-(5-hydroxy-1-oxo-1H-isochromen-3-yl)but-3-en-1-yl]oxy}n | C13H12O7S   | 311.0228123 | Yes |
| 5031 | HMDB0130058                       | {[(3E)-4-(5-hydroxy-1-oxo-1H-isochromen-3-yl)but-3-en-1-yl]oxy}n | C13H12O7S   | 311.0228123 | Yes |
| 5031 | HMDB0130093                       | {[2-hydroxy-1-(1-oxo-1H-isochromen-3-yl)but-3-en-1-yl]oxy}n      | C13H12O7S   | 311.0228123 | Yes |
| 5031 | HMDB0130094                       | {[1-hydroxy-1-(1-oxo-1H-isochromen-3-yl)but-3-en-2-yl]oxy}n      | C13H12O7S   | 311.0228123 | Yes |
| 5031 | HMDB0135800                       | {[(E)-2-methoxyethenyl]-2-oxo-2H-chromen-7-yl}me                 | C13H12O7S   | 311.0228123 | Yes |
| 5032 | HMDB0013680; CHEBI:664875         | Caftaric acid                                                    | C13H12O9    | 311.0396075 | No  |
| 5032 | HMDB0029276                       | Cis-Caffeoyl tartaric acid                                       | C13H12O9    | 311.0396075 | No  |
| 5034 | HMDB0011677                       | Galactose-beta-1,4-xylose                                        | C11H20O10   | 311.0982177 | Yes |
| 5034 | HMDB0029883                       | Sambubiose                                                       | C11H20O10   | 311.0982177 | Yes |
| 5034 | HMDB0029897                       | Serotonose                                                       | C11H20O10   | 311.0982177 | Yes |
| 5034 | HMDB0038854; C07560               | 3-O-beta-D-Galactopyranosyl-L-arabinose                          | C11H20O10   | 311.0982177 | Yes |
| 5034 | HMDB0038863                       | 2-O-beta-D-Galactopyranosyl-D-xylose                             | C11H20O10   | 311.0982177 | Yes |
| 5034 | HMDB0038864                       | 4-O-beta-D-Galactopyranosyl-D-xylose                             | C11H20O10   | 311.0982177 | Yes |
| 5034 | HMDB0140855                       | 6-([3,4-dihydroxy-4-(hydroxymethyl)oxolan-2-yl]oxy)n             | C11H20O10   | 311.0982177 | Yes |
| 5035 | HMDB0028985                       | Methionyl-Tyrosine                                               | C14H20N2O4S | 311.1070177 | Yes |
| 5035 | HMDB0029111                       | Tyrosyl-Methionine                                               | C14H20N2O4S | 311.1070177 | Yes |
| 5035 | HMDB0060892                       | 1-Naphtaldehyde                                                  | C22H16O2    | 311.1070177 | Yes |
| 5036 | HMDB0004304; C06080               | Nivalenol                                                        | C15H20O7    | 311.1144029 | Yes |
| 5036 | HMDB0031724                       | Moringyne                                                        | C15H20O7    | 311.1144029 | Yes |
| 5036 | HMDB0034861                       | 3-Hydroxychavicol 1-glucoside                                    | C15H20O7    | 311.1144029 | Yes |
| 5036 | HMDB0135312                       | 3,4,5-trihydroxy-6-(3-phenylpropoxy)oxane-2-carboxyl             | C15H20O7    | 311.1144029 | Yes |
| 5040 | HMDB0031976                       | Methyl (9Z)-10''-oxo-6,10''-diapo-6-carotenoate                  | C20H24O3    | 311.1632479 | No  |
| 5040 | HMDB0033294                       | 5-Methoxy-7-(4-hydroxyphenyl)-1-phenyl-3-heptanon                | C20H24O3    | 311.1632479 | No  |
| 5040 | HMDB0040761                       | 4''-Hydroxy-5,5''-diisopropyl-2,2''-dimethyl-3,4-biphen          | C20H24O3    | 311.1632479 | No  |
| 5040 | HMDB0061027                       | 2-hydroxyethinylestradiol                                        | C20H24O3    | 311.1632479 | No  |
| 5041 | HMDB0032549                       | N-Undecylbenzenesulfonic acid                                    | C17H28O3S   | 311.168713  | No  |
| 5043 | HMDB0000995; C03207; CHEBI:18204  | 16-Dehydropregesterone                                           | C21H28O2    | 311.2016858 | No  |
| 5043 | HMDB0004626                       | Tetrahydrogestrinone                                             | C21H28O2    | 311.2016858 | No  |
| 5043 | HMDB0014511; C08149; CHEBI:6443   | Levonorgestrel                                                   | C21H28O2    | 311.2016858 | No  |

|      |                                  |                                                                                                                             |             |             |     |
|------|----------------------------------|-----------------------------------------------------------------------------------------------------------------------------|-------------|-------------|-----|
| 5043 | HMDB0014522; CHEBI:31527         | Dydrogesterone                                                                                                              | C21H28O2    | 311.2016858 | No  |
| 5043 | HMDB0060580; CHEBI:34749         | Ethisterone                                                                                                                 | C21H28O2    | 311.2016858 | No  |
| 5044 | HMDB0003871; C04717; CHEBI:15655 | 13-L-Hydroperoxylinoleic acid                                                                                               | C18H32O4    | 311.2228034 | No  |
| 5044 | HMDB0004706; C14831; CHEBI:34485 | 8(R)-Hydroperoxylinoleic acid                                                                                               | C18H32O4    | 311.2228034 | No  |
| 5044 | HMDB0006940; C14827              | 9(S)-HPODE                                                                                                                  | C18H32O4    | 311.2228034 | No  |
| 5044 | HMDB0010201                      | 12,13-DiHODE                                                                                                                | C18H32O4    | 311.2228034 | No  |
| 5044 | HMDB0010208                      | 15,16-DiHODE                                                                                                                | C18H32O4    | 311.2228034 | No  |
| 5044 | HMDB0010221                      | 9,10-DiHODE                                                                                                                 | C18H32O4    | 311.2228034 | No  |
| 5044 | HMDB0040900                      | (±)-(E)-13-Hydroxy-10-oxo-11-octadecenoic acid                                                                              | C18H32O4    | 311.2228034 | No  |
| 5044 | HMDB0062281; C07338; CHEBI:15657 | 11-HpODE                                                                                                                    | C18H32O4    | 311.2228034 | No  |
| 5044 | HMDB0062434; C14827; CHEBI:34498 | (10E,12Z)-(9S)-9-Hydroperoxyoctadeca-10,12-dienoic acid                                                                     | C18H32O4    | 311.2228034 | No  |
| 5045 | HMDB0000417                      | 3D,7D,11D-Phytanic acid                                                                                                     | C20H40O2    | 311.2956387 | No  |
| 5045 | HMDB0000553                      | 3L,7D,11D-Phytanic acid                                                                                                     | C20H40O2    | 311.2956387 | No  |
| 5045 | HMDB0000801; C01607; CHEBI:16285 | Phytanic acid                                                                                                               | C20H40O2    | 311.2956387 | No  |
| 5045 | HMDB0002212; C06425; CHEBI:28822 | Arachidic acid                                                                                                              | C20H40O2    | 311.2956387 | No  |
| 5045 | HMDB0031318                      | 2,2,6,10,14-Pentamethylpentadecanoic acid                                                                                   | C20H40O2    | 311.2956387 | No  |
| 5045 | HMDB0034156; CHEBI:84936         | Ethyl stearate                                                                                                              | C20H40O2    | 311.2956387 | No  |
| 5045 | HMDB0035672                      | 5-Hydroxy-7-eicosanone                                                                                                      | C20H40O2    | 311.2956387 | No  |
| 5045 | HMDB0035673                      | 4-Hydroxy-6-eicosanone                                                                                                      | C20H40O2    | 311.2956387 | No  |
| 5045 | HMDB0062520                      | 3,7R,11R,15-tetramethyl-hexadecanoic acid                                                                                   | C20H40O2    | 311.2956387 | No  |
| 5062 | HMDB0010328; C03033              | Tyramine glucuronide                                                                                                        | C14H19NO7   | 312.1091698 | No  |
| 5093 | HMDB0029508; CHEBI:90194         | Laccaic acid D                                                                                                              | C16H10O7    | 313.0325928 | No  |
| 5093 | HMDB0126141                      | 12-hydroxy-5,7,9,20-tetraoxahexacyclo[11.7.0.0.0 <sup>2</sup> .1 <sup>2</sup> .0 <sup>3</sup> .?].0 <sup>3</sup> , C16H10O7 | C16H10O7    | 313.0325928 | No  |
| 5093 | HMDB0126142                      | 11,14-dihydroxy-6,8,19-trioxapentacyclo[10.7.0.0.0 <sup>2</sup> .?].0 <sup>2</sup> , C16H10O7                               | C16H10O7    | 313.0325928 | No  |
| 5093 | HMDB0128480                      | 4,5,14-trihydroxy-13-methoxy-8,17-dioxatetracyclo[8.1. C16H10O7                                                             | C16H10O7    | 313.0325928 | No  |
| 5093 | HMDB0128481                      | 5,14,15-trihydroxy-13-methoxy-8,17-dioxatetracyclo[8.1 C16H10O7                                                             | C16H10O7    | 313.0325928 | No  |
| 5093 | HMDB0128482                      | 5,6,14-trihydroxy-13-methoxy-8,17-dioxatetracyclo[8.1 C16H10O7                                                              | C16H10O7    | 313.0325928 | No  |
| 5093 | HMDB0128483                      | 5,12,14-trihydroxy-13-methoxy-8,17-dioxatetracyclo[8 C16H10O7                                                               | C16H10O7    | 313.0325928 | No  |
| 5093 | HMDB0128484                      | 3,5,14-trihydroxy-13-methoxy-8,17-dioxatetracyclo[8.1 C16H10O7                                                              | C16H10O7    | 313.0325928 | No  |
| 5094 | HMDB0130068                      | [2-hydroxy-1-(1-oxo-1H-isochromen-3-yl)butoxy]sulfonate C13H14O7S                                                           | C13H14O7S   | 313.0393928 | No  |
| 5094 | HMDB0130069                      | {[1-hydroxy-1-(1-oxo-1H-isochromen-3-yl)butan-2-yl]oxy} C13H14O7S                                                           | C13H14O7S   | 313.0393928 | No  |
| 5098 | HMDB0015667; CHEBI:253330        | Sulfaphenazole                                                                                                              | C15H14N4O2S | 313.0786913 | No  |
| 5099 | HMDB0029664                      | Vanilloside                                                                                                                 | C14H18O8    | 313.093113  | No  |
| 5099 | HMDB0033137                      | 2-Methoxycarbonylphenyl beta-D-glucopyranoside                                                                              | C14H18O8    | 313.093113  | No  |
| 5099 | HMDB0034060                      | 6-O-Acetyl-arbutin                                                                                                          | C14H18O8    | 313.093113  | No  |
| 5099 | HMDB0038333                      | 2-Hydroxyphenylacetic acid O-beta-D-glucoside                                                                               | C14H18O8    | 313.093113  | No  |
| 5099 | HMDB0038335                      | (S)-Mandelic acid O-beta-D-Glucopyranoside                                                                                  | C14H18O8    | 313.093113  | No  |
| 5099 | HMDB0040720                      | 2-O-Acetyl-arbutin                                                                                                          | C14H18O8    | 313.093113  | No  |
| 5099 | HMDB0124984                      | 6-(4-ethyl-2-hydroxyphenoxy)-3,4,5-trihydroxyoxane-2 C14H18O8                                                               | C14H18O8    | 313.093113  | No  |
| 5099 | HMDB0124985                      | 6-(5-ethyl-2-hydroxyphenoxy)-3,4,5-trihydroxyoxane-2 C14H18O8                                                               | C14H18O8    | 313.093113  | No  |
| 5099 | HMDB0126441                      | 6-(4-ethyl-3-hydroxyphenoxy)-3,4,5-trihydroxyoxane-2 C14H18O8                                                               | C14H18O8    | 313.093113  | No  |
| 5099 | HMDB0126442                      | 6-(2-ethyl-5-hydroxyphenoxy)-3,4,5-trihydroxyoxane-2 C14H18O8                                                               | C14H18O8    | 313.093113  | No  |
| 5100 | HMDB0001930; D00673; CHEBI:8776  | Ranitidine                                                                                                                  | C13H22N4O3S | 313.1343427 | No  |
| 5101 | HMDB0029848                      | (-)-trans-Carveol glucoside                                                                                                 | C16H26O6    | 313.1673871 | Yes |
| 5101 | HMDB0029849                      | (+)-trans-Carveol glucoside                                                                                                 | C16H26O6    | 313.1673871 | Yes |
| 5101 | HMDB0033347; C17567              | Lotusine                                                                                                                    | C19H24NO3   | 313.1673871 | Yes |
| 5101 | HMDB0038706                      | Perilloside A                                                                                                               | C16H26O6    | 313.1673871 | Yes |
| 5101 | HMDB0040697                      | Oblongine                                                                                                                   | C19H24NO3   | 313.1673871 | Yes |
| 5102 | HMDB0030263                      | Rhazidigenine Nb-oxide                                                                                                      | C19H26N2O2  | 313.1925832 | No  |
| 5103 | HMDB0032995                      | 2-Undecyl-4(1H)-quinolinone N-oxide                                                                                         | C20H28NO2   | 313.2073833 | No  |
| 5105 | HMDB0000782; CHEBI:133086        | Octadecanedioic acid                                                                                                        | C18H34O4    | 313.2387999 | No  |
| 5105 | HMDB0004704; C14828              | 9,10-DHOME                                                                                                                  | C18H34O4    | 313.2387999 | No  |
| 5105 | HMDB0004705; C14829              | 12,13-DHOME                                                                                                                 | C18H34O4    | 313.2387999 | No  |
| 5105 | HMDB0031679                      | (9xi,10xi,12xi)-9,10-Dihydroxy-12-octadecenoic acid                                                                         | C18H34O4    | 313.2387999 | No  |
| 5105 | HMDB0041220                      | Dibutyl decanedioate                                                                                                        | C18H34O4    | 313.2387999 | No  |
| 5116 | HMDB0015382                      | Mitiglinide                                                                                                                 | C19H25NO3   | 314.1764827 | No  |
| 5116 | HMDB0030185; CHEBI:713939        | (E)-Piperolein A                                                                                                            | C19H25NO3   | 314.1764827 | No  |
| 5118 | HMDB0094676                      | Val-Val-Val                                                                                                                 | C15H29N3O4  | 314.2082357 | No  |
| 5138 | HMDB0032013                      | Vanilloside                                                                                                                 | C14H20O8    | 315.1088756 | No  |
| 5138 | HMDB0041024                      | Hydroxytyrosol 1-O-glucoside                                                                                                | C14H20O8    | 315.1088756 | No  |
| 5140 | HMDB0033643                      | 10-Hydroxy-8-nor-2-fenchanone glucoside                                                                                     | C15H24O7    | 315.1461358 | Yes |

|      |                                    |                                                       |            |             |     |
|------|------------------------------------|-------------------------------------------------------|------------|-------------|-----|
| 5140 | HMDB0035136                        | Glucosyl (E)-2,6-Dimethyl-2,5-heptadienoate           | C15H24O7   | 315.1461358 | Yes |
| 5141 | HMDB0029566                        | Isopulegone caffeate                                  | C19H24O4   | 315.1588496 | No  |
| 5141 | HMDB0134704                        | 3-[8-hydroxy-2-methyl-2-(4-methylpent-3-en-1-yl)-2H-  | C19H24O4   | 315.1588496 | No  |
| 5143 | HMDB0029346                        | Neryl glucoside                                       | C16H28O6   | 315.1811922 | Yes |
| 5143 | HMDB0029856                        | (S)-alpha-Terpinyol glucoside                         | C16H28O6   | 315.1811922 | Yes |
| 5143 | HMDB0030418                        | D-Linalool 3-glucoside                                | C16H28O6   | 315.1811922 | Yes |
| 5143 | HMDB0037147                        | 5(6)-Butyl-1,4-dioxan-2-one                           | C16H28O6   | 315.1811922 | Yes |
| 5143 | HMDB0040563                        | Perilloside C                                         | C16H28O6   | 315.1811922 | Yes |
| 5143 | HMDB0060004; CHEBI:89620           | Menthol-glucoronide                                   | C16H28O6   | 315.1811922 | Yes |
| 5147 | HMDB0011532                        | MG(0:0/15:0/0:0)                                      | C18H36O4   | 315.2541775 | No  |
| 5147 | HMDB0011563; CHEBI:710856          | MG(15:0/0:0/0:0)                                      | C18H36O4   | 315.2541775 | No  |
| 5147 | HMDB0031008                        | (+)-15,16-Dihydroxyoctadecanoic acid                  | C18H36O4   | 315.2541775 | No  |
| 5147 | HMDB0059633; C15988; CHEBI:49254   | (9S,10S)-9,10-dihydroxyoctadecanoate                  | C18H36O4   | 315.2541775 | No  |
| 5147 | HMDB0072849                        | MG(0:0/i-15:0/0:0)                                    | C18H36O4   | 315.2541775 | No  |
| 5147 | HMDB0072862                        | MG(0:0/a-15:0/0:0)[rac]                               | C18H36O4   | 315.2541775 | No  |
| 5147 | HMDB0072865                        | MG(a-15:0/0:0/0:0)[rac]                               | C18H36O4   | 315.2541775 | No  |
| 5147 | HMDB0072878                        | MG(i-15:0/0:0/0:0)                                    | C18H36O4   | 315.2541775 | No  |
| 5163 | HMDB0037839                        | N-(1-Deoxy-1-fructosyl)histidine                      | C12H19N3O7 | 316.1125108 | Yes |
| 5164 | HMDB0030341; C10166; CHEBI:564921  | Pipltartine                                           | C17H19NO5  | 316.1197109 | Yes |
| 5164 | HMDB0137022                        | 3-(3,4-dihydroxyphenyl)-N-[2-(3,4-dihydroxyphenyl)etl | C17H19NO5  | 316.1197109 | Yes |
| 5170 | HMDB0014869; C12508; CHEBI:146727  | Nateglinide                                           | C19H27NO3  | 316.1923209 | No  |
| 5170 | HMDB0015592; C11168; CHEBI:64028   | Tetrabenazine                                         | C19H27NO3  | 316.1923209 | No  |
| 5189 | HMDB0128688                        | {[3-(6,7-dimethoxy-2H-1,3-benzodioxol-5-yl)prop-2-en- | C12H14O8S  | 317.0343549 | No  |
| 5191 | HMDB0004068; C05606                | Melanin                                               | C18H10N2O4 | 317.0574533 | No  |
| 5192 | HMDB0041451                        | Musanolone F                                          | C20H14O4   | 317.0802533 | No  |
| 5196 | HMDB0006709; C00399; CHEBI:46372   | Ubiquinone-2                                          | C19H26O4   | 317.1742136 | Yes |
| 5196 | HMDB0030064                        | Cohulupone                                            | C19H26O4   | 317.1742136 | Yes |
| 5196 | HMDB0031373                        | (1(10)E,4E,6a,9b)-9-(2-Methylpropanoyloxy)-1(10),4,1: | C19H26O4   | 317.1742136 | Yes |
| 5196 | HMDB0035500                        | Panaquinquecol 6                                      | C19H26O4   | 317.1742136 | Yes |
| 5196 | HMDB0039277                        | [8]-Dehydrogingerdione                                | C19H26O4   | 317.1742136 | Yes |
| 5196 | HMDB0134951                        | 3-[2-(3,7-dimethylocta-2,6-dien-1-yl)-3,4-dihydroxyph | C19H26O4   | 317.1742136 | Yes |
| 5200 | HMDB0001337; C00909; CHEBI:15651   | Leukotriene A4                                        | C20H30O3   | 317.212858  | No  |
| 5200 | HMDB0005081; CHEBI:72801           | 5-HEPE                                                | C20H30O3   | 317.212858  | No  |
| 5200 | HMDB0006027; C14665                | Oxymesterone                                          | C20H30O3   | 317.212858  | No  |
| 5200 | HMDB0010202                        | 12-HEPE                                               | C20H30O3   | 317.212858  | No  |
| 5200 | HMDB0010205; CHEBI:137269          | 14,15-EpETE                                           | C20H30O3   | 317.212858  | No  |
| 5200 | HMDB0010209                        | 15-HEPE                                               | C20H30O3   | 317.212858  | No  |
| 5200 | HMDB0010210; C04577; CHEBI:15559   | 15-KETE                                               | C20H30O3   | 317.212858  | No  |
| 5200 | HMDB0010212; C13843; CHEBI:1263761 | 17,18-EpETE                                           | C20H30O3   | 317.212858  | No  |
| 5200 | HMDB0010217; C14732; CHEBI:52449   | 5-KETE                                                | C20H30O3   | 317.212858  | No  |
| 5200 | HMDB0012534; CHEBI:91264           | 11R-HEPE                                              | C20H30O3   | 317.212858  | No  |
| 5200 | HMDB0012611                        | 18R-HEPE                                              | C20H30O3   | 317.212858  | No  |
| 5200 | HMDB0013633; C14807; CHEBI:34151   | 12-KETE                                               | C20H30O3   | 317.212858  | No  |
| 5200 | HMDB0030101                        | Methyl [8]-Shogaol                                    | C20H30O3   | 317.212858  | No  |
| 5200 | HMDB0035116                        | (ent-7alpha)-7-Hydroxy-8(14),15-pimaradien-19-oic ac  | C20H30O3   | 317.212858  | No  |
| 5200 | HMDB0035311                        | Galanal A                                             | C20H30O3   | 317.212858  | No  |
| 5200 | HMDB0036698; C09110; CHEBI:5920    | Ineketone                                             | C20H30O3   | 317.212858  | No  |
| 5200 | HMDB0036706                        | Steviol                                               | C20H30O3   | 317.212858  | No  |
| 5200 | HMDB0036712                        | Yucalexin B20                                         | C20H30O3   | 317.212858  | No  |
| 5200 | HMDB0036713                        | Yucalexin B22                                         | C20H30O3   | 317.212858  | No  |
| 5200 | HMDB0036724                        | ent-17-Hydroxy-15-kauren-19-oic acid                  | C20H30O3   | 317.212858  | No  |
| 5200 | HMDB0036752                        | Yucalexin P17                                         | C20H30O3   | 317.212858  | No  |
| 5200 | HMDB0036776                        | Yucalexin A19                                         | C20H30O3   | 317.212858  | No  |
| 5200 | HMDB0036806                        | Aframodial                                            | C20H30O3   | 317.212858  | No  |
| 5200 | HMDB0036839                        | (ent-15beta)-15-Hydroxy-19-trachylobanoic acid        | C20H30O3   | 317.212858  | No  |
| 5200 | HMDB0036930                        | Grandiflorolic acid                                   | C20H30O3   | 317.212858  | No  |
| 5200 | HMDB0037523; C17498                | Galanolactone                                         | C20H30O3   | 317.212858  | No  |
| 5200 | HMDB0038521                        | 2-Hydroxy-6-(8-tridecenyl)benzoic acid                | C20H30O3   | 317.212858  | No  |
| 5200 | HMDB0039012                        | (ent-15beta)-15,19-Dihydroxy-7-trachylobanone         | C20H30O3   | 317.212858  | No  |
| 5200 | HMDB0039716                        | 12alpha-12-Hydroxy-7,13-abietadien-18-oic acid        | C20H30O3   | 317.212858  | No  |
| 5200 | HMDB0041058                        | Phytocassane C                                        | C20H30O3   | 317.212858  | No  |

|      |                                  |                                                       |             |             |     |
|------|----------------------------------|-------------------------------------------------------|-------------|-------------|-----|
| 5200 | HMDB0060053                      | 9-HEPE                                                | C20H30O3    | 317.212858  | No  |
| 5200 | HMDB0061114                      | Atractyligenin                                        | C20H30O3    | 317.212858  | No  |
| 5200 | HMDB0062222; C18177; CHEBI:81563 | 18R-hydroxy-5Z,8Z,11Z,14Z,16E-eicosapentaenoic acid   | C20H30O3    | 317.212858  | No  |
| 5200 | HMDB0062293; CHEBI:91140         | 15R-hydroxy-5Z,8Z,11Z,13E,17Z-eicosapentaenoic acid   | C20H30O3    | 317.212858  | No  |
| 5200 | HMDB0062296; CHEBI:88347         | 15S-hydroxy-5Z,8Z,11Z,13E,17Z-eicosapentaenoic acid   | C20H30O3    | 317.212858  | No  |
| 5200 | HMDB0062408                      | 5S-hydroxy-6E,8Z,11Z,14Z,17Z-eicosapentaenoic acid    | C20H30O3    | 317.212858  | No  |
| 5200 | HMDB0137419                      | (4E)-1-(3,4-dihydroxyphenyl)tetradec-4-en-3-one       | C20H30O3    | 317.212858  | No  |
| 5202 | HMDB0031461                      | Xylene                                                | C24H30      | 317.2277007 | No  |
| 5236 | HMDB0135412                      | {2-hydroxy-5-[(2E)-3-phenylprop-2-enoyl]phenyl}oxida  | C15H12O6S   | 319.0298584 | No  |
| 5237 | HMDB0062560; CHEBI:77843         | thymidine 3'-monophosphate                            | C10H13N2O8P | 319.0360584 | No  |
| 5240 | HMDB0029292                      | 3-p-Coumaroyl-1,5-quinolactone                        | C16H16O7    | 319.0821471 | No  |
| 5240 | HMDB0029293                      | 4-p-Coumaroyl-1,5-quinolactone                        | C16H16O7    | 319.0821471 | No  |
| 5240 | HMDB0041295                      | 7-Hydroxy-6-methoxy-alpha-pyrufuran                   | C16H16O7    | 319.0821471 | No  |
| 5240 | HMDB0125015                      | 5-(4,7-dihydroxy-6-methoxy-3,4-dihydro-2H-1-benzop    | C16H16O7    | 319.0821471 | No  |
| 5240 | HMDB0125016                      | 1-(2,4-dihydroxy-5-methoxyphenyl)-2-(2,4,5-trihydrox  | C16H16O7    | 319.0821471 | No  |
| 5240 | HMDB0125018                      | 3-(2,5-dihydroxy-4-methoxyphenyl)-3,4-dihydro-2H-1-   | C16H16O7    | 319.0821471 | No  |
| 5240 | HMDB0125019                      | 2-(2,5-dihydroxy-4-methoxyphenyl)-1-(2,4,5-trihydrox  | C16H16O7    | 319.0821471 | No  |
| 5240 | HMDB0128216                      | 3-(3,4-dihydroxy-5-methoxyphenyl)-1-(2,4,6-trihydrox  | C16H16O7    | 319.0821471 | No  |
| 5240 | HMDB0129343                      | 2-(3-hydroxy-4-methoxyphenyl)-1-(2,3,4,6-tetrahydrox  | C16H16O7    | 319.0821471 | No  |
| 5240 | HMDB0129352                      | 2-(2,3-dihydroxy-4-methoxyphenyl)-1-(2,4,6-trihydrox  | C16H16O7    | 319.0821471 | No  |
| 5240 | HMDB0129358                      | 2-(2,5-dihydroxy-4-methoxyphenyl)-1-(2,4,6-trihydrox  | C16H16O7    | 319.0821471 | No  |
| 5240 | HMDB0130179                      | 3-(4-methoxyphenyl)-1-(2,3,4,5,6-pentahydroxyphenyl   | C16H16O7    | 319.0821471 | No  |
| 5240 | HMDB0130331                      | 3-(4-hydroxy-3-methoxyphenyl)-1-(2,3,4,6-tetrahydrox  | C16H16O7    | 319.0821471 | No  |
| 5240 | HMDB0133840                      | 2-(2-hydroxy-4-methoxyphenyl)-1-(2,3,4,6-tetrahydrox  | C16H16O7    | 319.0821471 | No  |
| 5241 | HMDB0041463                      | 2,3-Dihydro-2,3-dihydroxy-4-(4-methoxyphenyl)-1H-p    | C20H16O4    | 319.0956685 | No  |
| 5241 | HMDB0126080                      | 5-hydroxy-8,8-dimethyl-4-phenyl-2H,8H-pyrano[2,3-f]   | C20H16O4    | 319.0956685 | No  |
| 5243 | HMDB0015159; CHEBI:168396        | Mycophenolic acid                                     | C17H20O6    | 319.119262  | Yes |
| 5243 | HMDB0030742; CHEBI:475114        | Helipyron                                             | C17H20O6    | 319.119262  | Yes |
| 5243 | HMDB0037321                      | Oleacein                                              | C17H20O6    | 319.119262  | Yes |
| 5243 | HMDB0130121                      | 5-hydroxy-8-(2-hydroxypropan-2-yl)-4-(1-hydroxyprop   | C17H20O6    | 319.119262  | Yes |
| 5243 | HMDB0130122                      | 5-hydroxy-8-(2-hydroxypropan-2-yl)-4-(2-hydroxyprop   | C17H20O6    | 319.119262  | Yes |
| 5243 | HMDB0130123                      | 8-(1,2-dihydroxypropan-2-yl)-5-hydroxy-4-propyl-2H,8  | C17H20O6    | 319.119262  | Yes |
| 5243 | HMDB0130124                      | 5-hydroxy-8-(2-hydroxypropan-2-yl)-4-(3-hydroxyprop   | C17H20O6    | 319.119262  | Yes |
| 5244 | HMDB0000901                      | Valproic acid glucuronide                             | C14H24O8    | 319.1393926 | Yes |
| 5244 | HMDB0010347; C03033              | Octanoylglucuronide                                   | C14H24O8    | 319.1393926 | Yes |
| 5245 | HMDB0032698                      | Bis(2-methylpropanoyloxy)-9,10-epoxy-p-mentha-1,3,!   | C18H24O5    | 319.1553187 | Yes |
| 5245 | HMDB0041824; C14750              | alpha-Zearalenol                                      | C18H24O5    | 319.1553187 | Yes |
| 5245 | HMDB0041838; C14751              | beta-Zearalenol                                       | C18H24O5    | 319.1553187 | Yes |
| 5245 | HMDB0134978                      | 2-[2-(3,7-dimethylocta-2,6-dien-1-yl)-3,4-dihydroxyph | C18H24O5    | 319.1553187 | Yes |
| 5281 | HMDB0061011                      | N-desmethyalmotriptan                                 | C16H23N3O2S | 320.1439502 | No  |
| 5297 | HMDB0128305                      | 3,4-dihydroxy-5-(3,4,5-trihydroxybenzoyloxy)benzoic a | C14H10O9    | 321.0257334 | No  |
| 5299 | HMDB0136090                      | 2-(3,4,5-trihydroxyphenyl)-3,4-dihydro-2H-1-benzopyr  | C15H14O8    | 321.0625935 | Yes |
| 5300 | HMDB0006834; C04079; CHEBI:18416 | D-Pantothenoyl-L-cysteine                             | C12H22N2O6S | 321.1125937 | Yes |
| 5300 | HMDB0029530; CHEBI:603420        | Glabrene                                              | C20H18O4    | 321.1125937 | Yes |
| 5300 | HMDB0034173; C10514              | Phaseollin                                            | C20H18O4    | 321.1125937 | Yes |
| 5300 | HMDB0041167                      | (-)-Shinpterocarpin                                   | C20H18O4    | 321.1125937 | Yes |
| 5300 | HMDB0041399                      | 2,3-Dihydro-4-(4-methoxyphenyl)-1H-phenalene-1,2,3    | C20H18O4    | 321.1125937 | Yes |
| 5300 | HMDB0125839                      | 3-(5-hydroxy-2,2-dimethyl-2H-chromen-6-yl)-1-(4-hydr  | C20H18O4    | 321.1125937 | Yes |
| 5300 | HMDB0131486                      | 5,7-dihydroxy-8-(3-methylbut-2-en-1-yl)-4-phenyl-2H-  | C20H18O4    | 321.1125937 | Yes |
| 5302 | HMDB0032702; C14752              | Zeranol                                               | C18H26O5    | 321.1724738 | Yes |
| 5316 | HMDB0060619; CHEBI:73129         | Tazarotenic acid                                      | C19H17NO2S  | 322.0916262 | Yes |
| 5317 | HMDB0015252; CHEBI:31654         | Gliclazide                                            | C15H21N3O3S | 322.1234218 | No  |
| 5336 | HMDB0013880                      | S-6-Hydroxywarfarin                                   | C19H16O5    | 323.0932487 | Yes |
| 5336 | HMDB0013881                      | S-4"-Hydroxywarfarin                                  | C19H16O5    | 323.0932487 | Yes |
| 5336 | HMDB0013882                      | R-4"-Hydroxywarfarin                                  | C19H16O5    | 323.0932487 | Yes |
| 5336 | HMDB0013883                      | R-6-Hydroxywarfarin                                   | C19H16O5    | 323.0932487 | Yes |
| 5336 | HMDB0013884                      | R-10-Hydroxywarfarin                                  | C19H16O5    | 323.0932487 | Yes |
| 5336 | HMDB0013885                      | R-8-Hydroxywarfarin                                   | C19H16O5    | 323.0932487 | Yes |
| 5336 | HMDB0013886                      | R-7-Hydroxywarfarin                                   | C19H16O5    | 323.0932487 | Yes |
| 5336 | HMDB0041296                      | Moracin K                                             | C19H16O5    | 323.0932487 | Yes |
| 5336 | HMDB0041297                      | Moracin L                                             | C19H16O5    | 323.0932487 | Yes |

|      |                                  |                                                        |              |             |     |
|------|----------------------------------|--------------------------------------------------------|--------------|-------------|-----|
| 5336 | HMDB0140986                      | 4-hydroxy-3-[1-(2-hydroxyphenyl)-3-oxobutyl]-2H-chro   | C19H16O5     | 323.0932487 | Yes |
| 5336 | HMDB0140987                      | 4,6-dihydroxy-3-(3-oxo-1-phenylbutyl)-2H-chromen-2-    | C19H16O5     | 323.0932487 | Yes |
| 5336 | HMDB0140988                      | 4,7-dihydroxy-3-(3-oxo-1-phenylbutyl)-2H-chromen-2-    | C19H16O5     | 323.0932487 | Yes |
| 5336 | HMDB0140989                      | 4-hydroxy-3-[1-(4-hydroxyphenyl)-3-oxobutyl]-2H-chrc   | C19H16O5     | 323.0932487 | Yes |
| 5336 | HMDB0140990                      | 4,8-dihydroxy-3-(3-oxo-1-phenylbutyl)-2H-chromen-2-    | C19H16O5     | 323.0932487 | Yes |
| 5336 | HMDB0140991                      | 4,5-dihydroxy-3-(3-oxo-1-phenylbutyl)-2H-chromen-2-    | C19H16O5     | 323.0932487 | Yes |
| 5336 | HMDB0140992                      | 4-hydroxy-3-(2-hydroxy-3-oxo-1-phenylbutyl)-2H-chro    | C19H16O5     | 323.0932487 | Yes |
| 5336 | HMDB0140993                      | 4-hydroxy-3-(4-hydroxy-3-oxo-1-phenylbutyl)-2H-chro    | C19H16O5     | 323.0932487 | Yes |
| 5336 | HMDB0140995                      | 4-hydroxy-3-[1-(3-hydroxyphenyl)-3-oxobutyl]-2H-chrc   | C19H16O5     | 323.0932487 | Yes |
| 5336 | HMDB0142561                      | 2-hydroxy-3-[(1R)-2-hydroxy-3-oxo-1-phenylbutyl]-4H-   | C19H16O5     | 323.0932487 | Yes |
| 5336 | HMDB0142603                      | 2,8-dihydroxy-3-(3-oxo-1-phenylbutyl)-4H-chromen-4-    | C19H16O5     | 323.0932487 | Yes |
| 5337 | HMDB0014558; C06806; CHEBI:28052 | Acetohexamide                                          | C15H20N2O4S  | 323.1072765 | Yes |
| 5340 | HMDB0014611; C06526; CHEBI:15854 | Quinine                                                | C20H24N2O2   | 323.176513  | No  |
| 5340 | HMDB0015044; C06527; CHEBI:28593 | Quinidine                                              | C20H24N2O2   | 323.176513  | No  |
| 5345 | HMDB0031007; CHEBI:1011895       | 1-Acetoxy-2-hydroxy-16-heptadecyn-4-one                | C19H32O4     | 323.2229139 | No  |
| 5359 | HMDB0002377                      | Urothion                                               | C11H11N5O3S2 | 324.023211  | No  |
| 5360 | HMDB0059997; CHEBI:88744         | Dihydroxy-1H-indole glucuronide I                      | C14H15NO8    | 324.0728541 | Yes |
| 5362 | HMDB0015294; CHEBI:112465        | Amdinocillin                                           | C15H23N3O3S  | 324.1398403 | No  |
| 5366 | HMDB0005049; C13800              | 10-Nitrolinoleic acid                                  | C18H31NO4    | 324.2185439 | No  |
| 5366 | HMDB0014443; CHEBI:51066         | Dapiprazole                                            | C19H27N5     | 324.2185439 | No  |
| 5366 | HMDB0014750; C06852; CHEBI:3127  | Bisoprolol                                             | C18H31NO4    | 324.2185439 | No  |
| 5366 | HMDB0033503                      | Small bacteriocin                                      | C18H31NO4    | 324.2185439 | No  |
| 5366 | HMDB0041248                      | N-[[3-Hydroxy-2-(2-pentenyl)cyclopentyl]acetyl]isoleuc | C18H31NO4    | 324.2185439 | No  |
| 5367 | HMDB0015170; C07750; CHEBI:9622  | Tolterodine                                            | C22H31NO     | 324.2315418 | No  |
| 5384 | HMDB0128974                      | {[4-(7-methoxy-2-oxo-2H-chromen-6-yl)but-3-en-2-yl]c   | C14H14O7S    | 325.0392111 | Yes |
| 5384 | HMDB0132710                      | {[1-(7-hydroxy-2-oxo-2H-chromen-8-yl)-3-methylbut-3    | C14H14O7S    | 325.0392111 | Yes |
| 5386 | HMDB0039723                      | 3-O-alpha-D-Glucopyranuronosyl-D-xylose                | C11H18O11    | 325.0758937 | Yes |
| 5386 | HMDB0040737                      | Aldobiouronic acid D3                                  | C11H18O11    | 325.0758937 | Yes |
| 5386 | HMDB0127654                      | 6-[2-carboxy-2,2-bis(hydroxymethyl)ethoxy]-3,4,5-trih  | C11H18O11    | 325.0758937 | Yes |
| 5386 | HMDB0127655                      | 3,4,5-trihydroxy-6-([3-hydroxy-2,2-bis(hydroxymethyl)  | C11H18O11    | 325.0758937 | Yes |
| 5388 | HMDB0060610                      | Hydroxyhexamide                                        | C15H22N2O4S  | 325.1235338 | Yes |
| 5389 | HMDB0034755                      | 1-Methoxy-3-(4-hydroxyphenyl)-2E-propenal 4"-gluco     | C16H22O7     | 325.1292784 | Yes |
| 5389 | HMDB0034863                      | 4-(4-Hydroxyphenyl)-2-butanone glucoside               | C16H22O7     | 325.1292784 | Yes |
| 5389 | HMDB0038708                      | Citrusin C                                             | C16H22O7     | 325.1292784 | Yes |
| 5389 | HMDB0133673                      | 3,4,5-trihydroxy-6-(2-methyl-3-phenylpropoxy)oxane-2   | C16H22O7     | 325.1292784 | Yes |
| 5390 | HMDB0038595                      | Alkaloid AQC2                                          | C19H22N2O3   | 325.1557213 | No  |
| 5392 | HMDB0031031                      | 2-Dodecylbenzenesulfonic acid                          | C18H30O3S    | 325.1856502 | Yes |
| 5392 | HMDB0059915                      | 4-Dodecylbenzenesulfonic Acid                          | C18H30O3S    | 325.1856502 | Yes |
| 5392 | HMDB0061835; CHEBI:44748         | Heptaethylene glycol                                   | C14H30O8     | 325.1856502 | Yes |
| 5408 | HMDB0010316; CHEBI:32636         | Acetaminophen glucuronide                              | C14H17NO8    | 326.0885073 | No  |
| 5408 | HMDB0029344                      | Blepharin                                              | C14H17NO8    | 326.0885073 | No  |
| 5410 | HMDB0062579; CHEBI:77016         | (4Z,7Z,10Z,13Z,16Z,19Z)-docosahexaenoate               | C22H31O2     | 326.2232965 | No  |
| 5411 | HMDB0062579; CHEBI:77016         | (4Z,7Z,10Z,13Z,16Z,19Z)-docosahexaenoate               | C22H31O2     | 326.2268965 | No  |
| 5439 | HMDB0033622                      | Cabbage identification factor 2                        | C15H12N4O3S  | 327.057901  | No  |
| 5441 | HMDB0029677                      | Zapotinin                                              | C18H16O6     | 327.0856486 | No  |
| 5441 | HMDB0030596                      | Ugaxanthone                                            | C18H16O6     | 327.0856486 | No  |
| 5441 | HMDB0030727; C09479              | Betagarin                                              | C18H16O6     | 327.0856486 | No  |
| 5441 | HMDB0030834                      | Americanin A                                           | C18H16O6     | 327.0856486 | No  |
| 5441 | HMDB0033169                      | Garbogiol                                              | C18H16O6     | 327.0856486 | No  |
| 5441 | HMDB0033318                      | Isoamericanin A                                        | C18H16O6     | 327.0856486 | No  |
| 5441 | HMDB0034109; CHEBI:48201         | Frenolicin B                                           | C18H16O6     | 327.0856486 | No  |
| 5441 | HMDB0034186                      | Morusignin B                                           | C18H16O6     | 327.0856486 | No  |
| 5441 | HMDB0037458                      | 5-Hydroxy-4'',7,8-trimethoxyflavone                    | C18H16O6     | 327.0856486 | No  |
| 5441 | HMDB0039601                      | Americanin D                                           | C18H16O6     | 327.0856486 | No  |
| 5441 | HMDB0040303                      | 5-Hydroxy-4,4'',6-trimethoxyaurone                     | C18H16O6     | 327.0856486 | No  |
| 5441 | HMDB0040719                      | 8-Hydroxy-4'',5,7-trimethoxyflavone                    | C18H16O6     | 327.0856486 | No  |
| 5441 | HMDB0040935                      | Methyl 2-(2-methoxy-4-hydroxyphenyl)-6-methoxy-3-t     | C18H16O6     | 327.0856486 | No  |
| 5441 | HMDB0041544                      | 7-Hydroxy-3,4'',8-trimethoxyflavone                    | C18H16O6     | 327.0856486 | No  |
| 5441 | HMDB0128575                      | 7-hydroxy-5,6-dimethoxy-2-(4-methoxyphenyl)-4H-chr     | C18H16O6     | 327.0856486 | No  |
| 5441 | HMDB0128576                      | 6-hydroxy-5,7-dimethoxy-2-(4-methoxyphenyl)-4H-chr     | C18H16O6     | 327.0856486 | No  |
| 5441 | HMDB0128577                      | 5-hydroxy-6,7-dimethoxy-2-(4-methoxyphenyl)-4H-chr     | C18H16O6     | 327.0856486 | No  |

|      |                                   |                                                                    |             |     |
|------|-----------------------------------|--------------------------------------------------------------------|-------------|-----|
| 5441 | HMDB0128578                       | 2-(4-hydroxyphenyl)-5,6,7-trimethoxy-4H-chromen-4-ol C18H16O6      | 327.0856486 | No  |
| 5441 | HMDB0129574                       | 5-hydroxy-3-(4-hydroxy-3-methoxyphenyl)-7-methoxy- C18H16O6        | 327.0856486 | No  |
| 5441 | HMDB0130360                       | 3-(3,4-dimethoxyphenyl)-6-hydroxy-7-methoxy-4H-chr C18H16O6        | 327.0856486 | No  |
| 5441 | HMDB0130363                       | 3-(3,4-dimethoxyphenyl)-8-hydroxy-7-methoxy-4H-chr C18H16O6        | 327.0856486 | No  |
| 5441 | HMDB0130364                       | 3-(3,4-dimethoxyphenyl)-5-hydroxy-7-methoxy-4H-chr C18H16O6        | 327.0856486 | No  |
| 5441 | HMDB0140447                       | 7-hydroxy-2-(3,4,5-trimethoxyphenyl)-4H-chromen-4-ol C18H16O6      | 327.0856486 | No  |
| 5441 | HMDB0140448                       | 6-hydroxy-2-(3,4,5-trimethoxyphenyl)-4H-chromen-4-ol C18H16O6      | 327.0856486 | No  |
| 5441 | HMDB0140451                       | 5-hydroxy-2-(3,4,5-trimethoxyphenyl)-4H-chromen-4-ol C18H16O6      | 327.0856486 | No  |
| 5445 | HMDB0029777                       | Cymorcin monoglucoside C16H24O7                                    | 327.1450388 | No  |
| 5445 | HMDB0032110                       | Litcubine C19H22NO4                                                | 327.1450388 | No  |
| 5445 | HMDB0039385                       | 3-Hydroxy-4-isopropylbenzyl alcohol 3-glucoside C16H24O7           | 327.1450388 | No  |
| 5445 | HMDB0040465                       | Perilloside B C16H24O7                                             | 327.1450388 | No  |
| 5446 | HMDB0014736; C07063; CHEBI:6343   | Labetalol C19H24N2O3                                               | 327.1711539 | No  |
| 5450 | HMDB0002183; C06429; CHEBI:28125  | Docosahexaenoic acid C22H32O2                                      | 327.233069  | No  |
| 5450 | HMDB0030053                       | Neogrifolin C22H32O2                                               | 327.233069  | No  |
| 5450 | HMDB0030446; CHEBI:544843         | Grifolin C22H32O2                                                  | 327.233069  | No  |
| 5450 | HMDB0035185; CHEBI:32095          | Retinol acetate C22H32O2                                           | 327.233069  | No  |
| 5450 | HMDB0038908                       | (Z,Z)-2-Methyl-5-(8,11,14-pentadecatrienyl)-1,3-benze C22H32O2     | 327.233069  | No  |
| 5452 | HMDB0011534                       | MG(0:0/16:1(9Z)/0:0) C19H36O4                                      | 327.2522646 | No  |
| 5452 | HMDB0011565                       | MG(16:1(9Z)/0:0/0:0) C19H36O4                                      | 327.2522646 | No  |
| 5452 | HMDB0031043; CHEBI:967297         | Avocadoene 1-acetate C19H36O4                                      | 327.2522646 | No  |
| 5452 | HMDB0031044                       | Avocadoene 2-acetate C19H36O4                                      | 327.2522646 | No  |
| 5452 | HMDB0031045                       | Avocadoene 4-acetate C19H36O4                                      | 327.2522646 | No  |
| 5477 | HMDB0000058; C00575; CHEBI:17489  | Cyclic AMP C10H12N5O6P                                             | 328.0452807 | Yes |
| 5477 | HMDB0011616; C02353; CHEBI:27844  | Adenosine 2'',3''-cyclic phosphate C10H12N5O6P                     | 328.0452807 | Yes |
| 5477 | HMDB0031800; C18661; CHEBI:38718  | Mecarbam C10H20NO5PS2                                              | 328.0452807 | Yes |
| 5480 | HMDB0032805                       | N-trans-Feruloyloctopamine C18H19NO5                               | 328.1179598 | Yes |
| 5480 | HMDB0136405                       | N-[2-hydroxy-2-(4-hydroxyphenyl)ethyl]-3-(4-hydroxy- C18H19NO5     | 328.1179598 | Yes |
| 5480 | HMDB0137042                       | 3-(4-hydroxy-3-methoxyphenyl)-N-[2-(4-hydroxypheny C18H19NO5       | 328.1179598 | Yes |
| 5480 | HMDB0137055                       | (2E)-N-[2-(3,4-dihydroxyphenyl)ethyl]-3-(4-hydroxy-3-r C18H19NO5   | 328.1179598 | Yes |
| 5484 | HMDB0013202                       | 6-Keto-decanoylcarnitine C17H31NO5                                 | 328.2118376 | No  |
| 5504 | HMDB0040621                       | 3''-Glucosyl-2'',4'',6''-trihydroxyacetophenone C14H18O9           | 329.0881569 | Yes |
| 5504 | HMDB0128028                       | 6-(5-ethyl-2,3-dihydroxyphenoxy)-3,4,5-trihydroxyoxar C14H18O9     | 329.0881569 | Yes |
| 5504 | HMDB0128029                       | 6-(4-ethyl-2,6-dihydroxyphenoxy)-3,4,5-trihydroxyoxar C14H18O9     | 329.0881569 | Yes |
| 5506 | HMDB0005796                       | Picrocrocin C16H26O7                                               | 329.1610638 | Yes |
| 5506 | HMDB0031382                       | Portuloside A C16H26O7                                             | 329.1610638 | Yes |
| 5506 | HMDB0033111                       | Epijasminoside A C16H26O7                                          | 329.1610638 | Yes |
| 5506 | HMDB0033224                       | (1R,4R,5S)-5-Hydroxyfenchone glucoside C16H26O7                    | 329.1610638 | Yes |
| 5506 | HMDB0033225                       | (1R,4S,6R)-6-Hydroxyfenchone glucoside C16H26O7                    | 329.1610638 | Yes |
| 5506 | HMDB0033226                       | (1S,4R)-10-Hydroxyfenchone glucoside C16H26O7                      | 329.1610638 | Yes |
| 5506 | HMDB0034558                       | 6-Hydroxy-2-bornanone glucoside C16H26O7                           | 329.1610638 | Yes |
| 5506 | HMDB0038979                       | (3b,4b,5b)-4,5-Epoxy-p-menth-1-en-3-ol 3-glucoside C16H26O7        | 329.1610638 | Yes |
| 5506 | HMDB0039056                       | (4S,6R)-p-Mentha-1,8-diene-6,7-diol 7-glucoside C16H26O7           | 329.1610638 | Yes |
| 5507 | HMDB0002121; C09069; CHEBI:468005 | Carnosol C20H26O4                                                  | 329.1767038 | Yes |
| 5507 | HMDB0036749                       | Momilactone B C20H26O4                                             | 329.1767038 | Yes |
| 5507 | HMDB0036753                       | Yucalexin P15 C20H26O4                                             | 329.1767038 | Yes |
| 5507 | HMDB0036755                       | Yucalexin P8 C20H26O4                                              | 329.1767038 | Yes |
| 5507 | HMDB0039613                       | 3,3'',4,4''-Tetrahydroxy-5,5''-diisopropyl-2,2''-dimethyl C20H26O4 | 329.1767038 | Yes |
| 5511 | HMDB0004708; C14833               | 9,12,13-TriHOME C18H34O5                                           | 329.232553  | No  |
| 5511 | HMDB0004710; C14835               | 9,10,13-TriHOME C18H34O5                                           | 329.232553  | No  |
| 5511 | HMDB0030936                       | 5,8,12-Trihydroxy-9-octadecenoic acid C18H34O5                     | 329.232553  | No  |
| 5511 | HMDB0038555                       | (9S,10E,12S,13S)-9,12,13-Trihydroxy-10-octadecenoic C18H34O5       | 329.232553  | No  |
| 5512 | HMDB0011533; CHEBI:840954         | MG(0:0/16:0/0:0) C19H38O4                                          | 329.2698786 | No  |
| 5512 | HMDB0011564                       | MG(16:0/0:0/0:0) C19H38O4                                          | 329.2698786 | No  |
| 5512 | HMDB0031074; CHEBI:718061         | Glycerol 1-hexadecanoate C19H38O4                                  | 329.2698786 | No  |
| 5512 | HMDB0072844                       | MG(i-16:0/0:0/0:0) C19H38O4                                        | 329.2698786 | No  |
| 5512 | HMDB0072873                       | MG(0:0/i-16:0/0:0) C19H38O4                                        | 329.2698786 | No  |
| 5533 | HMDB0000905; C00360; CHEBI:17713  | Deoxyadenosine monophosphate C10H14N5O6P                           | 330.061926  | Yes |
| 5537 | HMDB0014924; CHEBI:50662          | Marimastat C15H29N3O5                                              | 330.2032208 | No  |
| 5561 | HMDB0014831; CHEBI:31624          | Fluorescein C20H12O5                                               | 331.0616187 | Yes |
| 5562 | HMDB0031721                       | Leonuriside A C14H20O9                                             | 331.101722  | Yes |



|      |                                  |                                                         |            |             |     |
|------|----------------------------------|---------------------------------------------------------|------------|-------------|-----|
| 5565 | HMDB0028808                      | Glutaminyltryptophan                                    | C16H20N4O4 | 331.1403244 | Yes |
| 5565 | HMDB0029081                      | Tryptophyl-Glutamine                                    | C16H20N4O4 | 331.1403244 | Yes |
| 5565 | HMDB0029097                      | Tryptophyl-Gamma-glutamate                              | C16H20N4O4 | 331.1403244 | Yes |
| 5566 | HMDB0030787                      | (R)-Marmin                                              | C19H24O5   | 331.1550386 | Yes |
| 5566 | HMDB0034987                      | Gibberellin A61                                         | C19H24O5   | 331.1550386 | Yes |
| 5566 | HMDB0035041; C11865; CHEBI:29599 | Gibberellin A51                                         | C19H24O5   | 331.1550386 | Yes |
| 5566 | HMDB0035042                      | Gibberellin A45                                         | C19H24O5   | 331.1550386 | Yes |
| 5566 | HMDB0038014                      | Gibberellin A70                                         | C19H24O5   | 331.1550386 | Yes |
| 5566 | HMDB0134705                      | 3-[8-hydroxy-2-(hydroxymethyl)-2-(4-methylpent-3-en     | C19H24O5   | 331.1550386 | Yes |
| 5566 | HMDB0134706                      | 3-hydroxy-3-[8-hydroxy-2-methyl-2-(4-methylpent-3-e     | C19H24O5   | 331.1550386 | Yes |
| 5566 | HMDB0134707                      | 3-[6,8-dihydroxy-2-methyl-2-(4-methylpent-3-en-1-yl)-   | C19H24O5   | 331.1550386 | Yes |
| 5566 | HMDB0134708                      | 3-[7,8-dihydroxy-2-methyl-2-(4-methylpent-3-en-1-yl)-   | C19H24O5   | 331.1550386 | Yes |
| 5566 | HMDB0134709                      | 3-{2-[2-(3,3-dimethyloxiran-2-yl)ethyl]-8-hydroxy-2-me  | C19H24O5   | 331.1550386 | Yes |
| 5566 | HMDB0134710                      | 3-[8-hydroxy-5-methyl-5-(4-methylpent-3-en-1-yl)-3,6-   | C19H24O5   | 331.1550386 | Yes |
| 5566 | HMDB0134711                      | 2-hydroxy-3-[8-hydroxy-2-methyl-2-(4-methylpent-3-e     | C19H24O5   | 331.1550386 | Yes |
| 5566 | HMDB0134712                      | 3-[8-hydroxy-2-(2-hydroxy-4-methylpent-3-en-1-yl)-2-r   | C19H24O5   | 331.1550386 | Yes |
| 5566 | HMDB0134713                      | 3-[8-hydroxy-2-[(3E)-5-hydroxy-4-methylpent-3-en-1-y    | C19H24O5   | 331.1550386 | Yes |
| 5566 | HMDB0134714                      | 3-[8-hydroxy-2-(5-hydroxy-4-methylpent-3-en-1-yl)-2-r   | C19H24O5   | 331.1550386 | Yes |
| 5566 | HMDB0134715                      | 3-[8-hydroxy-2-(1-hydroxy-4-methylpent-3-en-1-yl)-2-r   | C19H24O5   | 331.1550386 | Yes |
| 5567 | HMDB0028962                      | Lysyl-Tryptophan                                        | C17H24N4O3 | 331.1767572 | No  |
| 5567 | HMDB0029088                      | Tryptophyl-Lysine                                       | C17H24N4O3 | 331.1767572 | No  |
| 5567 | HMDB0029784                      | Unshuoside A                                            | C16H28O7   | 331.1767572 | No  |
| 5567 | HMDB0033019                      | 7-Hydroxyterpineol 8-glucoside                          | C16H28O7   | 331.1767572 | No  |
| 5567 | HMDB0033110                      | (1S,2S,4R)-1,8-Epoxy-p-menthan-2-ol glucoside           | C16H28O7   | 331.1767572 | No  |
| 5567 | HMDB0033215                      | 1,8-Epoxy-p-menthan-4-ol glucoside                      | C16H28O7   | 331.1767572 | No  |
| 5567 | HMDB0033220                      | (1R,2R,4S,6R)-2,6-Fenchenediol 2-O-b-D-glucoside        | C16H28O7   | 331.1767572 | No  |
| 5567 | HMDB0033221                      | (1R,2S,4R,5S)-2,5-Fenchenediol 2-O-b-D-glucoside        | C16H28O7   | 331.1767572 | No  |
| 5567 | HMDB0033644                      | (1S,2S,4S,5S)-2,4-Thujanediol 4-O-beta-D-Glucopyrano    | C16H28O7   | 331.1767572 | No  |
| 5567 | HMDB0034772                      | (1R,3S,4S)-1,8-Epoxy-p-menthan-3-ol glucoside           | C16H28O7   | 331.1767572 | No  |
| 5567 | HMDB0035025                      | 6Z-8-Hydroxygeraniol 8-O-glucoside                      | C16H28O7   | 331.1767572 | No  |
| 5567 | HMDB0035634                      | Betulalbuside A                                         | C16H28O7   | 331.1767572 | No  |
| 5567 | HMDB0038747                      | (2E,4E,7R)-2,7-Dimethyl-2,4-octadiene-1,8-diol 8-O-b-[- | C16H28O7   | 331.1767572 | No  |
| 5567 | HMDB0038980                      | (4R,6S)-p-Menth-1-ene-4,6-diol 4-glucoside              | C16H28O7   | 331.1767572 | No  |
| 5567 | HMDB0038981                      | (S)-p-Menth-1-ene-4,7-diol 4-glucoside                  | C16H28O7   | 331.1767572 | No  |
| 5567 | HMDB0039055                      | (1S,2R,4R)-p-Menth-8-ene-2,10-diol 2-glucoside          | C16H28O7   | 331.1767572 | No  |
| 5567 | HMDB0060012; CHEBI:89610         | Neomenthol-glucuronide                                  | C16H28O7   | 331.1767572 | No  |
| 5568 | HMDB0030935                      | 9,10,13-Trihydroxystearic acid                          | C18H36O5   | 331.2486752 | No  |
| 5568 | HMDB0034295; C19621              | Floionolic acid                                         | C18H36O5   | 331.2486752 | No  |
| 5570 | HMDB0002226; C16527; CHEBI:53487 | Adrenic acid                                            | C22H36O2   | 331.2642202 | No  |
| 5570 | HMDB0035676                      | 1-Hydroxy-1-phenyl-3-hexadecanone                       | C22H36O2   | 331.2642202 | No  |
| 5570 | HMDB0035677                      | 3-Hydroxy-1-phenyl-1-hexadecanone                       | C22H36O2   | 331.2642202 | No  |
| 5570 | HMDB0038910                      | 2-Methyl-5-(8-pentadecenyl)-1,3-benzenediol             | C22H36O2   | 331.2642202 | No  |
| 5570 | HMDB0062725; CHEBI:84873         | Ethyl Arachidonate                                      | C22H36O2   | 331.2642202 | No  |
| 5610 | HMDB0133344                      | [3-(7-hydroxy-4-oxo-4H-chromen-2-yl)phenyl]oxidan       | C15H10O7S  | 333.0079131 | Yes |
| 5610 | HMDB0134560                      | [3-(3-hydroxy-4-oxo-4H-chromen-2-yl)phenyl]oxidan       | C15H10O7S  | 333.0079131 | Yes |
| 5610 | HMDB0137537                      | {4-[(6-hydroxy-3-oxo-2,3-dihydro-1-benzofuran-2-ylid    | C15H10O7S  | 333.0079131 | Yes |
| 5611 | HMDB0060029; CHEBI:89551         | 5-(3'',4'',5''-Trihydroxyphenyl)-gamma-valerolactone-C  | C12H14O9S  | 333.0290132 | No  |
| 5611 | HMDB0128699                      | [1-(6,7-dimethoxy-2H-1,3-benzodioxol-5-yl)-3-oxoprop    | C12H14O9S  | 333.0290132 | No  |
| 5611 | HMDB0128707                      | {[1-(6,7-dimethoxy-2H-1,3-benzodioxol-5-yl)-3-oxopro]   | C12H14O9S  | 333.0290132 | No  |
| 5611 | HMDB0128717                      | {[3-(6,7-dimethoxy-2H-1,3-benzodioxol-5-yl)oxiran-2-y   | C12H14O9S  | 333.0290132 | No  |
| 5614 | HMDB0014450; C06681; CHEBI:27504 | Mitomycin                                               | C15H18N4O5 | 333.1195962 | Yes |
| 5616 | HMDB0037499                      | 3''-N''-Acetylfulsaro-chromanone                        | C17H22N2O5 | 333.1460534 | Yes |
| 5617 | HMDB0040461                      | 1,5-Dibutyl methyl hydroxycitrate                       | C15H26O8   | 333.1559083 | Yes |
| 5618 | HMDB0032699                      | 3-(2-Methylpropanoyloxy)-8-(2-methylbutanoyloxy)-9,     | C19H26O5   | 333.1710935 | No  |
| 5618 | HMDB0032700                      | 3-(2-Methylpropanoyloxy)-8-(3-methylbutanoyloxy)-9,     | C19H26O5   | 333.1710935 | No  |
| 5618 | HMDB0134962                      | 3-[3,4-dihydroxy-2-(4-hydroxy-3,7-dimethylocta-2,6-di   | C19H26O5   | 333.1710935 | No  |
| 5618 | HMDB0134963                      | 3-{3,4-dihydroxy-2-[(2Z)-4-hydroxy-3-(4-methylpent-3-   | C19H26O5   | 333.1710935 | No  |
| 5618 | HMDB0134964                      | 3-[3,4-dihydroxy-2-(8-hydroxy-3,7-dimethylocta-2,6-di   | C19H26O5   | 333.1710935 | No  |
| 5618 | HMDB0134965                      | 3-{3,4-dihydroxy-2-[(6E)-8-hydroxy-3,7-dimethylocta-2   | C19H26O5   | 333.1710935 | No  |
| 5618 | HMDB0134966                      | 3-[2-(3,7-dimethylocta-2,6-dien-1-yl)-3,4-dihydroxyph   | C19H26O5   | 333.1710935 | No  |
| 5618 | HMDB0134967                      | 3-[3,4-dihydroxy-2-(5-hydroxy-3,7-dimethylocta-2,6-di   | C19H26O5   | 333.1710935 | No  |

|      |                                    |                                                                                                             |              |             |     |
|------|------------------------------------|-------------------------------------------------------------------------------------------------------------|--------------|-------------|-----|
| 5618 | HMDB0134968                        | 3-(3,4-dihydroxy-2-[[3-methyl-3-(4-methylpent-3-en-1-yl)-2-oxoprop-1-en-1-yl]oxy]propanoic acid             | C19H26O5     | 333.1710935 | No  |
| 5618 | HMDB0134969                        | 3-(2-[5-(3,3-dimethyloxiran-2-yl)-3-methylpent-2-en-1-yl]oxy)propanoic acid                                 | C19H26O5     | 333.1710935 | No  |
| 5618 | HMDB0134970                        | 3-[2-(3,7-dimethylocta-2,6-dien-1-yl)-3,4,6-trihydroxyphenyl]propanoic acid                                 | C19H26O5     | 333.1710935 | No  |
| 5618 | HMDB0134971                        | 3-[2-(3,7-dimethylocta-2,6-dien-1-yl)-3,4-dihydroxyphenyl]propanoic acid                                    | C19H26O5     | 333.1710935 | No  |
| 5618 | HMDB0134972                        | 3-[2-(3,7-dimethylocta-2,6-dien-1-yl)-3,4,5-trihydroxyphenyl]propanoic acid                                 | C19H26O5     | 333.1710935 | No  |
| 5624 | HMDB0000879; C13713; CHEBI:805752  | Tetrahydrodeoxycorticosterone                                                                               | C21H34O3     | 333.2426944 | No  |
| 5624 | HMDB0029583                        | Lycopersiconol                                                                                              | C21H34O3     | 333.2426944 | No  |
| 5624 | HMDB0035283                        | 1-(3,5-Dihydroxyphenyl)-2-pentadecanone                                                                     | C21H34O3     | 333.2426944 | No  |
| 5624 | HMDB0036302                        | ent-16beta-Methoxy-19-kauranoic acid                                                                        | C21H34O3     | 333.2426944 | No  |
| 5624 | HMDB0038104                        | Isolinderenolide                                                                                            | C21H34O3     | 333.2426944 | No  |
| 5624 | HMDB0040642                        | [10]-Paradol                                                                                                | C21H34O3     | 333.2426944 | No  |
| 5626 | HMDB0002823; CHEBI:1038735         | Docosatrienoic acid                                                                                         | C22H38O2     | 333.2808038 | No  |
| 5626 | HMDB0031099                        | (all-Z)-7,10,13-Docosatrienoic acid                                                                         | C22H38O2     | 333.2808038 | No  |
| 5647 | HMDB0000489; C04540; CHEBI:17261   | Aspartylglycosamine                                                                                         | C12H21N3O8   | 334.1284034 | No  |
| 5648 | HMDB0015054; CHEBI:520985          | Almotriptan                                                                                                 | C17H25N3O2S  | 334.1595459 | No  |
| 5648 | HMDB0015087; C07792; CHEBI:7478    | Naratriptan                                                                                                 | C17H25N3O2S  | 334.1595459 | No  |
| 5678 | HMDB0062424; CHEBI:58564           | 5-Phosphoribosyl-4-carboxy-5-aminoimidazole                                                                 | C9H11N3O9P   | 335.0170779 | Yes |
| 5682 | HMDB0029287                        | 3-Caffeoyl-1,5-quinolactone                                                                                 | C16H16O8     | 335.0745781 | No  |
| 5682 | HMDB0029288                        | 4-Caffeoyl-1,5-quinolactone                                                                                 | C16H16O8     | 335.0745781 | No  |
| 5682 | HMDB0030654                        | 3-O-Caffeoylshikimic acid                                                                                   | C16H16O8     | 335.0745781 | No  |
| 5682 | HMDB0033563                        | Juglone glucoside                                                                                           | C16H16O8     | 335.0745781 | No  |
| 5682 | HMDB0033997                        | 4-O-Caffeoylshikimic acid                                                                                   | C16H16O8     | 335.0745781 | No  |
| 5682 | HMDB0033999; C10434                | Dattelic acid                                                                                               | C16H16O8     | 335.0745781 | No  |
| 5682 | HMDB0060562                        | Captopril-cysteine disulfide                                                                                | C12H20N2O5S2 | 335.0745781 | No  |
| 5682 | HMDB0125035                        | 5-(4,7-dihydroxy-6-methoxy-3,4-dihydro-2H-1-benzopyran-2-yl)-2-methoxyphenyl                                | C16H16O8     | 335.0745781 | No  |
| 5682 | HMDB0125036                        | 1-(2,4-dihydroxy-5-methoxyphenyl)-2-(2,3,4,5-tetrahydroxy-3,4-dihydro-2H-1-benzopyran-2-yl)-2-methoxyphenyl | C16H16O8     | 335.0745781 | No  |
| 5682 | HMDB0125038                        | 3-(2,3,5-trihydroxy-4-methoxyphenyl)-3,4-dihydro-2H-1-benzopyran-2-yl)-2-methoxyphenyl                      | C16H16O8     | 335.0745781 | No  |
| 5682 | HMDB0125039                        | 2-(2,3,5-trihydroxy-4-methoxyphenyl)-1-(2,4,5-trihydroxy-3,4-dihydro-2H-1-benzopyran-2-yl)-2-methoxyphenyl  | C16H16O8     | 335.0745781 | No  |
| 5682 | HMDB0125050                        | 4-(4,7-dihydroxy-6-methoxy-3,4-dihydro-2H-1-benzopyran-2-yl)-2-methoxyphenyl                                | C16H16O8     | 335.0745781 | No  |
| 5682 | HMDB0125051                        | 1-(2,4-dihydroxy-5-methoxyphenyl)-2-(2,3,4,6-tetrahydroxy-3,4-dihydro-2H-1-benzopyran-2-yl)-2-methoxyphenyl | C16H16O8     | 335.0745781 | No  |
| 5682 | HMDB0125053                        | 3-(2,3,6-trihydroxy-4-methoxyphenyl)-3,4-dihydro-2H-1-benzopyran-2-yl)-2-methoxyphenyl                      | C16H16O8     | 335.0745781 | No  |
| 5682 | HMDB0125054                        | 2-(2,3,6-trihydroxy-4-methoxyphenyl)-1-(2,4,5-trihydroxy-3,4-dihydro-2H-1-benzopyran-2-yl)-2-methoxyphenyl  | C16H16O8     | 335.0745781 | No  |
| 5682 | HMDB0125065                        | 6-methoxy-3-(2,4,5-trihydroxyphenyl)-3,4-dihydro-2H-1-benzopyran-2-yl)-2-methoxyphenyl                      | C16H16O8     | 335.0745781 | No  |
| 5682 | HMDB0125066                        | 1-(2,3,4-trihydroxy-5-methoxyphenyl)-2-(2,4,5-trihydroxy-3,4-dihydro-2H-1-benzopyran-2-yl)-2-methoxyphenyl  | C16H16O8     | 335.0745781 | No  |
| 5682 | HMDB0125068                        | 3-(2,5-dihydroxy-4-methoxyphenyl)-3,4-dihydro-2H-1-benzopyran-2-yl)-2-methoxyphenyl                         | C16H16O8     | 335.0745781 | No  |
| 5682 | HMDB0125069                        | 2-(2,5-dihydroxy-4-methoxyphenyl)-1-(2,3,4,5-tetrahydroxy-3,4-dihydro-2H-1-benzopyran-2-yl)-2-methoxyphenyl | C16H16O8     | 335.0745781 | No  |
| 5682 | HMDB0125078                        | 1-(2,4,6-trihydroxy-3-methoxyphenyl)-2-(2,4,5-trihydroxy-3,4-dihydro-2H-1-benzopyran-2-yl)-2-methoxyphenyl  | C16H16O8     | 335.0745781 | No  |
| 5682 | HMDB0125080                        | 2-(2,5-dihydroxy-4-methoxyphenyl)-1-(2,3,4,6-tetrahydroxy-3,4-dihydro-2H-1-benzopyran-2-yl)-2-methoxyphenyl | C16H16O8     | 335.0745781 | No  |
| 5682 | HMDB0125083                        | 7-hydroxy-6-methoxy-3-(1,2,5-trihydroxy-4-oxocyclohex-2-en-1-yl)-2-methoxyphenyl                            | C16H16O8     | 335.0745781 | No  |
| 5682 | HMDB0126514                        | 3,5,7-trihydroxy-2-(1-hydroxy-3-methoxy-4-oxocyclohex-2-en-1-yl)-2-methoxyphenyl                            | C16H16O8     | 335.0745781 | No  |
| 5685 | HMDB0033107                        | Semilepidinoside A                                                                                          | C16H20N2O6   | 335.1256882 | Yes |
| 5691 | HMDB0015324; C06803; CHEBI:2379    | Acebutolol                                                                                                  | C18H28N2O4   | 335.1977597 | No  |
| 5693 | HMDB0001085; C02165; CHEBI:15647   | Leukotriene B4                                                                                              | C20H32O4     | 335.2229721 | No  |
| 5693 | HMDB0001193; C05356; CHEBI:15632   | 5(S)-Hydroperoxyeicosatetraenoic acid                                                                       | C20H32O4     | 335.2229721 | No  |
| 5693 | HMDB0002236                        | 8-iso-PGA1                                                                                                  | C20H32O4     | 335.2229721 | No  |
| 5693 | HMDB0002656; C04685; CHEBI:15545   | Prostaglandin A1                                                                                            | C20H32O4     | 335.2229721 | No  |
| 5693 | HMDB0002982; C00959; CHEBI:27624   | Prostaglandin B1                                                                                            | C20H32O4     | 335.2229721 | No  |
| 5693 | HMDB0004243; C05965; CHEBI:15626   | 12(S)-HPETE                                                                                                 | C20H32O4     | 335.2229721 | No  |
| 5693 | HMDB0004244; C05966; CHEBI:15628   | 15(S)-HPETE                                                                                                 | C20H32O4     | 335.2229721 | No  |
| 5693 | HMDB0004688; C14808; CHEBI:15631   | Hepoxilin A3                                                                                                | C20H32O4     | 335.2229721 | No  |
| 5693 | HMDB0004690; C14810; CHEBI:34784   | Hepoxilin B3                                                                                                | C20H32O4     | 335.2229721 | No  |
| 5693 | HMDB0004692; C14812; CHEBI:34145   | 12(R)-HPETE                                                                                                 | C20H32O4     | 335.2229721 | No  |
| 5693 | HMDB0004693; C14813                | 11H-14,15-EETA                                                                                              | C20H32O4     | 335.2229721 | No  |
| 5693 | HMDB0004696; C14820; CHEBI:34127   | 11(R)-HPETE                                                                                                 | C20H32O4     | 335.2229721 | No  |
| 5693 | HMDB0004699; C14823; CHEBI:34487   | 8(S)-HPETE                                                                                                  | C20H32O4     | 335.2229721 | No  |
| 5693 | HMDB0005050; C14781                | 15H-11,12-EETA                                                                                              | C20H32O4     | 335.2229721 | No  |
| 5693 | HMDB0005087; CHEBI:63981           | 6-trans-Leukotriene B4                                                                                      | C20H32O4     | 335.2229721 | No  |
| 5693 | HMDB0005088; CHEBI:63982           | 6-trans-12-epi-Leukotriene B4                                                                               | C20H32O4     | 335.2229721 | No  |
| 5693 | HMDB0005089; C04853; CHEBI:1221367 | 12(S)-Leukotriene B4                                                                                        | C20H32O4     | 335.2229721 | No  |
| 5693 | HMDB0010204                        | 14,15-DiHETE                                                                                                | C20H32O4     | 335.2229721 | No  |
| 5693 | HMDB0010211; CHEBI:1263764         | 17,18-DiHETE                                                                                                | C20H32O4     | 335.2229721 | No  |

|      |                                   |                                                       |             |             |     |
|------|-----------------------------------|-------------------------------------------------------|-------------|-------------|-----|
| 5693 | HMDB0010216; CHEBI:91286          | 5,15-DiHETE                                           | C20H32O4    | 335.2229721 | No  |
| 5693 | HMDB0010219                       | 8,15-DiHETE                                           | C20H32O4    | 335.2229721 | No  |
| 5693 | HMDB0011135; C05356               | 5-HPETE                                               | C20H32O4    | 335.2229721 | No  |
| 5693 | HMDB0012498                       | 10,11-dihydro-12-oxo-LTB4                             | C20H32O4    | 335.2229721 | No  |
| 5693 | HMDB0012839                       | 6,7-dihydro-5-oxo-12-epi-LTB4                         | C20H32O4    | 335.2229721 | No  |
| 5693 | HMDB0034686                       | (14S)-14,15-Dihydroxy-8(17),13(16)-labdadien-19-oic a | C20H32O4    | 335.2229721 | No  |
| 5693 | HMDB0039171                       | 9alpha-(3-Methylbutanoyloxy)-4S-hydroxy-10(14)-oplc   | C20H32O4    | 335.2229721 | No  |
| 5693 | HMDB0039441                       | ent-1(10)-Halimene-15,19-dioic acid                   | C20H32O4    | 335.2229721 | No  |
| 5693 | HMDB0060103                       | 9-Deoxy-delta12-PGD2                                  | C20H32O4    | 335.2229721 | No  |
| 5693 | HMDB0060104; C04686; CHEBI:15546  | Prostaglandin C1                                      | C20H32O4    | 335.2229721 | No  |
| 5693 | HMDB0060105; CHEBI:90990          | 12,20-DiHETE                                          | C20H32O4    | 335.2229721 | No  |
| 5693 | HMDB0062409                       | 5,12-dihydroxy-6,8,10,14-eicosatetraenoic acid        | C20H32O4    | 335.2229721 | No  |
| 5693 | HMDB0062479                       | 10-hydroxy-11S,12S-epoxy-5Z,8Z,14Z-eicosatrienoic ac  | C20H32O4    | 335.2229721 | No  |
| 5693 | HMDB0062614                       | 5,20-DiHETE                                           | C20H32O4    | 335.2229721 | No  |
| 5693 | HMDB0062615; CHEBI:91136          | 5(S),11(R)-DiHETE                                     | C20H32O4    | 335.2229721 | No  |
| 5693 | HMDB0062619; C04849               | (5Z,9E,14Z)-(8xi,11R,12S)-11,12-epoxy-8-hydroxyicos   | C20H32O4    | 335.2229721 | No  |
| 5693 | HMDB0062687; CHEBI:90982          | 8,20-DiHETE                                           | C20H32O4    | 335.2229721 | No  |
| 5693 | HMDB0062688; CHEBI:91271          | 15-HPETE                                              | C20H32O4    | 335.2229721 | No  |
| 5693 | HMDB0062749; CHEBI:91138          | 5(S),15(R)-DiHETE                                     | C20H32O4    | 335.2229721 | No  |
| 5713 | HMDB0033374                       | Benzyl glycinate 4-methylbenzenesulfonate salt        | C16H19NO5S  | 336.0919805 | Yes |
| 5715 | HMDB0029332                       | 5-Methoxynoracronycine                                | C20H19NO4   | 336.1221806 | Yes |
| 5715 | HMDB0029827                       | Junosidine                                            | C20H19NO4   | 336.1221806 | Yes |
| 5715 | HMDB0033524                       | Lambertine                                            | C20H19NO4   | 336.1221806 | Yes |
| 5734 | HMDB0033444                       | 15-Acetyl-4-deoxynivalenol                            | C17H22O7    | 337.129243  | Yes |
| 5734 | HMDB0036137                       | Acetyldeoxynivalenol                                  | C17H22O7    | 337.129243  | Yes |
| 5734 | HMDB0039824                       | O-Acetylcyclocalopin A                                | C17H22O7    | 337.129243  | Yes |
| 5736 | HMDB0014727; CHEBI:51164          | Lisuride                                              | C20H26N4O   | 337.2041706 | No  |
| 5736 | HMDB0038720                       | Dodecyl gallate                                       | C19H30O5    | 337.2041706 | No  |
| 5736 | HMDB0040566                       | [6]-Gingerdiol 3-acetate                              | C19H30O5    | 337.2041706 | No  |
| 5736 | HMDB0040567                       | [6]-Gingerdiol 5-acetate                              | C19H30O5    | 337.2041706 | No  |
| 5738 | HMDB0002265; C14775; CHEBI:63966  | 14,15-DiHETrE                                         | C20H34O4    | 337.2359332 | No  |
| 5738 | HMDB0002311; C14773; CHEBI:63970  | 8,9-DiHETrE                                           | C20H34O4    | 337.2359332 | No  |
| 5738 | HMDB0002314; C14774; CHEBI:63969  | 11,12-DiHETrE                                         | C20H34O4    | 337.2359332 | No  |
| 5738 | HMDB0002343; C14772; CHEBI:63974  | 5,6-DHET                                              | C20H34O4    | 337.2359332 | No  |
| 5738 | HMDB0002995; C02165; CHEBI:15647  | 12-Keto-tetrahydro-leukotriene B4                     | C20H34O4    | 337.2359332 | No  |
| 5738 | HMDB0012504                       | 10,11-dihydro-leukotriene B4                          | C20H34O4    | 337.2359332 | No  |
| 5738 | HMDB0012838                       | 6,7-dihydro-12-epi-LTB4                               | C20H34O4    | 337.2359332 | No  |
| 5738 | HMDB0035379                       | Sterebin E                                            | C20H34O4    | 337.2359332 | No  |
| 5738 | HMDB0060106                       | 15-Hydroperoxyeicos-8Z,11Z,13E-trienoate              | C20H34O4    | 337.2359332 | No  |
| 5741 | HMDB0002068; C08316; CHEBI:28792  | Erucic acid                                           | C22H42O2    | 337.311112  | No  |
| 5741 | HMDB0002884; CHEBI:32428          | Cetoleic acid                                         | C22H42O2    | 337.311112  | No  |
| 5741 | HMDB0031013                       | Catelaic acid                                         | C22H42O2    | 337.311112  | No  |
| 5741 | HMDB0032470                       | Phytyl acetate                                        | C22H42O2    | 337.311112  | No  |
| 5741 | HMDB0035566                       | 7,9-Docosanedione                                     | C22H42O2    | 337.311112  | No  |
| 5741 | HMDB0035567                       | 6,8-Docosanedione                                     | C22H42O2    | 337.311112  | No  |
| 5741 | HMDB0035568                       | 5,7-Docosanedione                                     | C22H42O2    | 337.311112  | No  |
| 5741 | HMDB0035569                       | 4,6-Docosanedione                                     | C22H42O2    | 337.311112  | No  |
| 5741 | HMDB0062659; CHEBI:82946          | N-butyl Oleate                                        | C22H42O2    | 337.311112  | No  |
| 5762 | HMDB0006273; C04751; CHEBI:28413  | 5-amino-1-(5-phospho-D-ribosyl)imidazole-4-carboxyla  | C9H14N3O9P  | 338.0370551 | No  |
| 5762 | HMDB0012268                       | N5-Carboxyaminoimidazole ribonucleotide               | C9H14N3O9P  | 338.0370551 | No  |
| 5766 | HMDB0005034; C07502; CHEBI:63631  | Topiramate                                            | C12H21NO8S  | 338.0914177 | No  |
| 5766 | HMDB0040829                       | N-(1-Deoxy-b-D-fructopyranosyl) R(C(S)S)-alliin       | C12H21NO8S  | 338.0914177 | No  |
| 5768 | HMDB0014027                       | 7-Hydroxyglyclazide                                   | C15H21N3O4S | 338.1182477 | No  |
| 5768 | HMDB0014028                       | 6-Hydroxyglyclazide                                   | C15H21N3O4S | 338.1182477 | No  |
| 5768 | HMDB0014029                       | Methylhydroxyglyclazide                               | C15H21N3O4S | 338.1182477 | No  |
| 5770 | HMDB0015245; C06533; CHEBI:121716 | Papaverine                                            | C20H21NO4   | 338.1377553 | No  |
| 5770 | HMDB0036988                       | N-Methoxycarbonyl-N-nornuciferine                     | C20H21NO4   | 338.1377553 | No  |
| 5770 | HMDB0038629                       | Litebamine                                            | C20H21NO4   | 338.1377553 | No  |
| 5775 | HMDB0000583                       | Docosanamide                                          | C22H45NO    | 338.3447958 | No  |
| 5784 | HMDB0000968; C01220; CHEBI:17816  | 1D-Myo-inositol 1,4-bisphosphate                      | C6H14O12P2  | 338.9863173 | No  |
| 5784 | HMDB0001047; C00665; CHEBI:28602  | D-Fructose 2,6-bisphosphate                           | C6H14O12P2  | 338.9863173 | No  |

|      |                                  |                                                        |             |             |     |
|------|----------------------------------|--------------------------------------------------------|-------------|-------------|-----|
| 5784 | HMDB0001058; C00354; CHEBI:16905 | Fructose 1,6-bisphosphate                              | C6H14O12P2  | 338.9863173 | No  |
| 5784 | HMDB0003514; C01231; CHEBI:18148 | Alpha-D-Glucose 1,6-bisphosphate                       | C6H14O12P2  | 338.9863173 | No  |
| 5784 | HMDB0006234; C04062; CHEBI:18225 | 1D-Myo-inositol 1,3-bisphosphate                       | C6H14O12P2  | 338.9863173 | No  |
| 5784 | HMDB0006235; C04063; CHEBI:28858 | 1D-Myo-inositol 3,4-bisphosphate                       | C6H14O12P2  | 338.9863173 | No  |
| 5784 | HMDB0006872; C03785; CHEBI:4250  | D-Tagatose 1,6-bisphosphate                            | C6H14O12P2  | 338.9863173 | No  |
| 5784 | HMDB0060269                      | D-Mannose 1,6-bisphosphate                             | C6H14O12P2  | 338.9863173 | No  |
| 5784 | HMDB0060444; C05378; CHEBI:28013 | beta-D-Fructose 1,6-bisphosphate                       | C6H14O12P2  | 338.9863173 | No  |
| 5784 | HMDB0062191; C04064; CHEBI:18156 | 1-phosphatidyl-1D-myo-inositol-3,4-bisphosphate        | C6H14O12P2  | 338.9863173 | No  |
| 5787 | HMDB0001030; C05403              | 3''-Ketolactose                                        | C12H20O11   | 339.0936076 | Yes |
| 5787 | HMDB0029917                      | 2-O-(4-O-Methyl-a-D-glucopyranuronosyl)-D-xylose       | C12H20O11   | 339.0936076 | Yes |
| 5787 | HMDB0039725                      | 4-O-(4-O-Methyl-alpha-D-glucopyranuronosyl)-L-arabin   | C12H20O11   | 339.0936076 | Yes |
| 5787 | HMDB0039888                      | 3-O-(4-O-Methyl-a-D-glucopyranuronosyl)-L-arabinose    | C12H20O11   | 339.0936076 | Yes |
| 5787 | HMDB0039889                      | 4-O-beta-D-Glucopyranuronosyl-L-fucose                 | C12H20O11   | 339.0936076 | Yes |
| 5787 | HMDB0040159                      | 2-O-a-D-Galactopyranuronosyl-L-rhamnose                | C12H20O11   | 339.0936076 | Yes |
| 5787 | HMDB0124752                      | 3,4,5-trihydroxy-6-[(2,3,5-trihydroxy-6-methyloxan-4-y | C12H20O11   | 339.0936076 | Yes |
| 5788 | HMDB0030678                      | Linocinnamarin                                         | C16H20O8    | 339.1089076 | No  |
| 5788 | HMDB0035441                      | Oenanthoside A                                         | C16H20O8    | 339.1089076 | No  |
| 5788 | HMDB0060021; CHEBI:89553         | trans-isoeugenol-O-glucuronide                         | C16H20O8    | 339.1089076 | No  |
| 5788 | HMDB0133636                      | 6-(2-benzyl-3-oxopropoxy)-3,4,5-trihydroxyoxane-2-ca   | C16H20O8    | 339.1089076 | No  |
| 5788 | HMDB0133639                      | 3,4,5-trihydroxy-6-(2-methyl-3-oxo-1-phenylpropoxy)o   | C16H20O8    | 339.1089076 | No  |
| 5788 | HMDB0133641                      | 3,4,5-trihydroxy-6-[3-(2-methyl-3-oxopropyl)phenoxy]r  | C16H20O8    | 339.1089076 | No  |
| 5788 | HMDB0133643                      | 3,4,5-trihydroxy-6-[4-(2-methyl-3-oxopropyl)phenoxy]r  | C16H20O8    | 339.1089076 | No  |
| 5788 | HMDB0133645                      | 3,4,5-trihydroxy-6-[(2E)-3-hydroxy-2-(phenylmethylyde  | C16H20O8    | 339.1089076 | No  |
| 5788 | HMDB0133647                      | 3,4,5-trihydroxy-6-[3-[(1E)-3-hydroxy-2-methylprop-1-  | C16H20O8    | 339.1089076 | No  |
| 5788 | HMDB0133650                      | 3,4,5-trihydroxy-6-[4-[(1E)-3-hydroxy-2-methylprop-1-  | C16H20O8    | 339.1089076 | No  |
| 5788 | HMDB0133653                      | 3,4,5-trihydroxy-6-[(2-methyl-3-phenyloxiran-2-yl)meti | C16H20O8    | 339.1089076 | No  |
| 5788 | HMDB0133657                      | 3,4,5-trihydroxy-6-[2-[(1E)-3-hydroxy-2-methylprop-1-  | C16H20O8    | 339.1089076 | No  |
| 5788 | HMDB0133675                      | 3,4,5-trihydroxy-6-[(2-methyl-3-phenylpropanoyl)oxy]r  | C16H20O8    | 339.1089076 | No  |
| 5788 | HMDB0133732                      | 3,4,5-trihydroxy-6-[[3(E)-2-hydroxy-4-phenylbut-3-en-  | C16H20O8    | 339.1089076 | No  |
| 5788 | HMDB0133733                      | 3,4,5-trihydroxy-6-[[3(E)-1-hydroxy-4-phenylbut-3-en-  | C16H20O8    | 339.1089076 | No  |
| 5788 | HMDB0133736                      | 3,4,5-trihydroxy-6-[3-[(1E)-3-hydroxybut-1-en-1-yl]phe | C16H20O8    | 339.1089076 | No  |
| 5788 | HMDB0133739                      | 3,4,5-trihydroxy-6-[4-[(1E)-3-hydroxybut-1-en-1-yl]phe | C16H20O8    | 339.1089076 | No  |
| 5788 | HMDB0133742                      | 3,4,5-trihydroxy-6-[1-(3-phenyloxiran-2-yl)ethoxy]oxar | C16H20O8    | 339.1089076 | No  |
| 5788 | HMDB0133767                      | 3,4,5-trihydroxy-6-(2-oxo-4-phenylbutoxy)oxane-2-car   | C16H20O8    | 339.1089076 | No  |
| 5788 | HMDB0133769                      | 3,4,5-trihydroxy-6-(3-oxo-1-phenylbutoxy)oxane-2-car   | C16H20O8    | 339.1089076 | No  |
| 5788 | HMDB0133771                      | 3,4,5-trihydroxy-6-[3-(3-oxobutyl)phenoxy]oxane-2-car  | C16H20O8    | 339.1089076 | No  |
| 5788 | HMDB0133773                      | 3,4,5-trihydroxy-6-[4-(3-oxobutyl)phenoxy]oxane-2-car  | C16H20O8    | 339.1089076 | No  |
| 5788 | HMDB0135244                      | 3,4,5-trihydroxy-6-[2-methoxy-4-(prop-2-en-1-yl)phenr  | C16H20O8    | 339.1089076 | No  |
| 5788 | HMDB0135652                      | 3,4,5-trihydroxy-6-[[3-(4-methoxyphenyl)prop-2-en-1-   | C16H20O8    | 339.1089076 | No  |
| 5793 | HMDB0000944; C08281; CHEBI:28941 | Behenic acid                                           | C22H44O2    | 339.3264081 | No  |
| 5793 | HMDB0035651                      | 6-Hydroxy-8-docosanone                                 | C22H44O2    | 339.3264081 | No  |
| 5793 | HMDB0035655                      | 8-Hydroxy-6-docosanone                                 | C22H44O2    | 339.3264081 | No  |
| 5793 | HMDB0035660                      | 5-Hydroxy-7-docosanone                                 | C22H44O2    | 339.3264081 | No  |
| 5793 | HMDB0035667                      | 4-Hydroxy-6-docosanone                                 | C22H44O2    | 339.3264081 | No  |
| 5793 | HMDB0040290; CHEBI:85983         | Butyl octadecanoate                                    | C22H44O2    | 339.3264081 | No  |
| 5810 | HMDB0014535; CHEBI:32168         | Sulpiride                                              | C15H23N3O4S | 340.1338025 | Yes |
| 5810 | HMDB0015135; C12766; CHEBI:31444 | Cyclacillin                                            | C15H23N3O4S | 340.1338025 | Yes |
| 5831 | HMDB0000048; C05402; CHEBI:28053 | Melibiose                                              | C12H22O11   | 341.1090999 | Yes |
| 5831 | HMDB0000055; C06422; CHEBI:36217 | Cellobiose                                             | C12H22O11   | 341.1090999 | Yes |
| 5831 | HMDB0000163; C00208; CHEBI:47937 | D-Maltose                                              | C12H22O11   | 341.1090999 | Yes |
| 5831 | HMDB0000186; C00243; CHEBI:36219 | Alpha-Lactose                                          | C12H22O11   | 341.1090999 | Yes |
| 5831 | HMDB0000258; C00089; CHEBI:17992 | Sucrose                                                | C12H22O11   | 341.1090999 | Yes |
| 5831 | HMDB0000740; C07064; CHEBI:6359  | Lactulose                                              | C12H22O11   | 341.1090999 | Yes |
| 5831 | HMDB0000975; C01083; CHEBI:16551 | Trehalose                                              | C12H22O11   | 341.1090999 | Yes |
| 5831 | HMDB0002923; C00252; CHEBI:28189 | Isomaltose                                             | C12H22O11   | 341.1090999 | Yes |
| 5831 | HMDB0005826; C01235; CHEBI:17505 | Galactinol                                             | C12H22O11   | 341.1090999 | Yes |
| 5831 | HMDB0006603                      | 3-b-Galactopyranosyl glucose                           | C12H22O11   | 341.1090999 | Yes |
| 5831 | HMDB0006792; C05400; CHEBI:4808  | Epimelibiose                                           | C12H22O11   | 341.1090999 | Yes |
| 5831 | HMDB0011740; C19636; CHEBI:32528 | Turanose                                               | C12H22O11   | 341.1090999 | Yes |
| 5831 | HMDB0011742; C19632; CHEBI:33020 | Kojibiose                                              | C12H22O11   | 341.1090999 | Yes |
| 5831 | HMDB0029880                      | Neotrehalose                                           | C12H22O11   | 341.1090999 | Yes |

|      |                                   |                                                        |                          |             |     |
|------|-----------------------------------|--------------------------------------------------------|--------------------------|-------------|-----|
| 5831 | HMDB0029882; C01518; CHEBI:7570   | Sakebiose                                              | C12H22O11                | 341.1090999 | Yes |
| 5831 | HMDB0029898; C03323; CHEBI:16751  | Inulobiose                                             | C12H22O11                | 341.1090999 | Yes |
| 5831 | HMDB0029902                       | Galabiose                                              | C12H22O11                | 341.1090999 | Yes |
| 5831 | HMDB0029919                       | Maltulose                                              | C12H22O11                | 341.1090999 | Yes |
| 5831 | HMDB0029933; CHEBI:28085          | Mannobiose                                             | C12H22O11                | 341.1090999 | Yes |
| 5831 | HMDB0033368                       | DEAE-cellulose                                         | C12H22O11                | 341.1090999 | Yes |
| 5831 | HMDB0037138; C00897; CHEBI:18167  | Maltodextrin                                           | (C12H22O11) <sub>n</sub> | 341.1090999 | Yes |
| 5831 | HMDB0038489                       | Allolactose                                            | C12H22O11                | 341.1090999 | Yes |
| 5831 | HMDB0039237                       | Glucinol                                               | C12H22O11                | 341.1090999 | Yes |
| 5831 | HMDB0039727                       | Trehalulose                                            | C12H22O11                | 341.1090999 | Yes |
| 5831 | HMDB0039876                       | Fagopyritol A1                                         | C12H22O11                | 341.1090999 | Yes |
| 5831 | HMDB0041627; C01970; CHEBI:36218  | beta-Lactose                                           | C12H22O11                | 341.1090999 | Yes |
| 5831 | HMDB0060068; C04147; CHEBI:27554  | Glucose-1,3-mannose oligosaccharide                    | C12H22O11                | 341.1090999 | Yes |
| 5831 | HMDB0125600                       | 2-([3,4-dihydroxy-2,5-bis(hydroxymethyl)oxolan-2-yl]o  | C12H22O11                | 341.1090999 | Yes |
| 5831 | HMDB0133305                       | 6-([3,4,5-trihydroxy-6-(hydroxymethyl)oxan-2-yl]oxy)r  | C12H22O11                | 341.1090999 | Yes |
| 5832 | HMDB0002277                       | 2,3-Dinor-6-keto-prostaglandin F1 a                    | C18H30O6                 | 341.1967265 | Yes |
| 5832 | HMDB0002904                       | 2,3-Dinor-TXB2                                         | C18H30O6                 | 341.1967265 | Yes |
| 5832 | HMDB0038940                       | (-)-11-Hydroxy-9,15,16-trioxooctadecanoic acid         | C18H30O6                 | 341.1967265 | Yes |
| 5832 | HMDB0061154                       | Monic acid                                             | C18H30O6                 | 341.1967265 | Yes |
| 5832 | HMDB0062618; CHEBI:73944          | 2,3-dinor-6-oxoprostaglandin F1alpha                   | C18H30O6                 | 341.1967265 | Yes |
| 5834 | HMDB0002726                       | Guggulsterone                                          | C22H30O3                 | 341.2135325 | No  |
| 5834 | HMDB0031059; CHEBI:558148         | 2-Hydroxy-6-(8,11,14-pentadecatrienyl)benzoic acid     | C22H30O3                 | 341.2135325 | No  |
| 5834 | HMDB0060710                       | 17-Hydroxymethylethisterone                            | C22H30O3                 | 341.2135325 | No  |
| 5882 | HMDB0030477                       | Aflatoxin GM1                                          | C17H12O8                 | 343.0458547 | Yes |
| 5882 | HMDB0037754                       | Wharangin                                              | C17H12O8                 | 343.0458547 | Yes |
| 5882 | HMDB0142065                       | 5-hydroxy-11-methoxy-6,8,19-trioxapentacyclo[10.7.0    | C17H12O8                 | 343.0458547 | Yes |
| 5883 | HMDB0039287                       | Theogallin                                             | C14H16O10                | 343.0694566 | No  |
| 5883 | HMDB0125148                       | 6-[4-(carboxymethyl)-2-hydroxyphenoxy]-3,4,5-trihydr   | C14H16O10                | 343.0694566 | No  |
| 5883 | HMDB0125149                       | 6-[5-(carboxymethyl)-2-hydroxyphenoxy]-3,4,5-trihydr   | C14H16O10                | 343.0694566 | No  |
| 5883 | HMDB0125150                       | 6-([2-(3,4-dihydroxyphenyl)acetyl]oxy)-3,4,5-trihydrox | C14H16O10                | 343.0694566 | No  |
| 5883 | HMDB0127989                       | 6-(4-carboxy-2-methoxyphenoxy)-3,4,5-trihydroxyoxar    | C14H16O10                | 343.0694566 | No  |
| 5883 | HMDB0127990                       | 3,4,5-trihydroxy-6-(4-hydroxy-3-methoxybenzoyloxy)o    | C14H16O10                | 343.0694566 | No  |
| 5883 | HMDB0128033                       | 6-(3-carboxy-5-methoxyphenoxy)-3,4,5-trihydroxyoxar    | C14H16O10                | 343.0694566 | No  |
| 5883 | HMDB0128034                       | 3,4,5-trihydroxy-6-(3-hydroxy-5-methoxybenzoyloxy)o    | C14H16O10                | 343.0694566 | No  |
| 5883 | HMDB0130459                       | 6-[3-(carboxymethyl)-5-hydroxyphenoxy]-3,4,5-trihydr   | C14H16O10                | 343.0694566 | No  |
| 5883 | HMDB0130460                       | 6-([2-(3,5-dihydroxyphenyl)acetyl]oxy)-3,4,5-trihydrox | C14H16O10                | 343.0694566 | No  |
| 5883 | HMDB0140927                       | 6-(5-carboxy-2-methoxyphenoxy)-3,4,5-trihydroxyoxar    | C14H16O10                | 343.0694566 | No  |
| 5885 | HMDB0029647                       | Domesticoside                                          | C15H20O9                 | 343.1035369 | No  |
| 5885 | HMDB0034862                       | 4'',6''-Dihydroxy-2''-methoxyacetophenone 6''-glucosic | C15H20O9                 | 343.1035369 | No  |
| 5885 | HMDB0128017                       | 6-(5-ethyl-2-hydroxy-3-methoxyphenoxy)-3,4,5-trihydr   | C15H20O9                 | 343.1035369 | No  |
| 5885 | HMDB0128018                       | 6-(4-ethyl-2-hydroxy-6-methoxyphenoxy)-3,4,5-trihydr   | C15H20O9                 | 343.1035369 | No  |
| 5885 | HMDB0128043                       | 6-(2-ethyl-5-hydroxy-4-methoxyphenoxy)-3,4,5-trihydr   | C15H20O9                 | 343.1035369 | No  |
| 5885 | HMDB0128044                       | 6-(4-ethyl-5-hydroxy-2-methoxyphenoxy)-3,4,5-trihydr   | C15H20O9                 | 343.1035369 | No  |
| 5885 | HMDB0128054                       | 6-(6-ethyl-3-hydroxy-2-methoxyphenoxy)-3,4,5-trihydr   | C15H20O9                 | 343.1035369 | No  |
| 5885 | HMDB0128055                       | 6-(4-ethyl-3-hydroxy-2-methoxyphenoxy)-3,4,5-trihydr   | C15H20O9                 | 343.1035369 | No  |
| 5886 | HMDB0002928; CHEBI:203534         | Maltitol                                               | C12H24O11                | 343.1249704 | Yes |
| 5886 | HMDB0006791; C05399; CHEBI:27527  | Melibiotol                                             | C12H24O11                | 343.1249704 | Yes |
| 5886 | HMDB0029911                       | 1-O-alpha-D-Glucopyranosyl-D-mannitol                  | C12H24O11                | 343.1249704 | Yes |
| 5886 | HMDB0040937                       | Lactitol                                               | C12H24O11                | 343.1249704 | Yes |
| 5887 | HMDB0033066                       | (-)-erythro-Anethole glycol 1-glucoside                | C16H24O8                 | 343.1400768 | Yes |
| 5887 | HMDB0033067                       | (-)-erythro-Anethole glycol 2-glucoside                | C16H24O8                 | 343.1400768 | Yes |
| 5887 | HMDB0041509                       | Dihydroconiferin                                       | C16H24O8                 | 343.1400768 | Yes |
| 5888 | HMDB0015118; C07805; CHEBI:63082  | Formoterol                                             | C19H24N2O4               | 343.1663819 | No  |
| 5888 | HMDB0015399; CHEBI:408174         | Arformoterol                                           | C19H24N2O4               | 343.1663819 | No  |
| 5889 | HMDB0037146                       | 5(6)-Pentyl-1,4-dioxan-2-one                           | C18H32O6                 | 343.2130915 | Yes |
| 5890 | HMDB0001939; C07119; CHEBI:6715   | Medroxyprogesterone                                    | C22H32O3                 | 343.2297043 | No  |
| 5890 | HMDB0010213; CHEBI:72637          | 17-HDoHE                                               | C22H32O3                 | 343.2297043 | No  |
| 5890 | HMDB0013620; CHEBI:72653          | 19(20)-EpDPE                                           | C22H32O3                 | 343.2297043 | No  |
| 5890 | HMDB0013621; CHEBI:72855          | 16(17)-EpDPE                                           | C22H32O3                 | 343.2297043 | No  |
| 5890 | HMDB0014398; C14643; CHEBI:775124 | Medrysone                                              | C22H32O3                 | 343.2297043 | No  |
| 5890 | HMDB0015489; C08158; CHEBI:290629 | Testosterone Propionate                                | C22H32O3                 | 343.2297043 | No  |

|      |                                  |                                                        |             |             |     |
|------|----------------------------------|--------------------------------------------------------|-------------|-------------|-----|
| 5890 | HMDB0033896                      | Anacardic acid                                         | C22H32O3    | 343.2297043 | No  |
| 5890 | HMDB0039885                      | 3-Hydroxyneogrifolin                                   | C22H32O3    | 343.2297043 | No  |
| 5890 | HMDB0060037                      | 10-HDoHE                                               | C22H32O3    | 343.2297043 | No  |
| 5890 | HMDB0060040                      | 11-HDoHE                                               | C22H32O3    | 343.2297043 | No  |
| 5890 | HMDB0060047                      | 16-HDoHE                                               | C22H32O3    | 343.2297043 | No  |
| 5890 | HMDB0060048                      | 20-HDoHE                                               | C22H32O3    | 343.2297043 | No  |
| 5890 | HMDB0060049                      | 4-HDoHE                                                | C22H32O3    | 343.2297043 | No  |
| 5890 | HMDB0060050                      | 7-HDoHE                                                | C22H32O3    | 343.2297043 | No  |
| 5890 | HMDB0060051                      | 8-HDoHE                                                | C22H32O3    | 343.2297043 | No  |
| 5890 | HMDB0060112                      | 4-Hydroxy-all-trans-retinyl acetate                    | C22H32O3    | 343.2297043 | No  |
| 5907 | HMDB0001913; C07324; CHEBI:7772  | Omeprazole                                             | C17H19N3O3S | 344.1069792 | No  |
| 5907 | HMDB0005009; CHEBI:775271        | (S)-Esomeprazole                                       | C17H19N3O3S | 344.1069792 | No  |
| 5907 | HMDB0014874; CHEBI:50275         | Esomeprazole                                           | C17H19N3O3S | 344.1069792 | No  |
| 5907 | HMDB0031796; C11002; CHEBI:6009  | Isofenphos                                             | C15H24NO4PS | 344.1069792 | No  |
| 5913 | HMDB0061637                      | 3-hydroxyundecanoyl carnitine                          | C18H35NO5   | 344.2445847 | No  |
| 5930 | HMDB0015247; C07266; CHEBI:7565  | Nifedipine                                             | C17H18N2O6  | 345.1086415 | Yes |
| 5931 | HMDB0032742                      | Di-O-methylcrenatin                                    | C15H22O9    | 345.118446  | Yes |
| 5931 | HMDB0035057                      | 1-(3-Hydroxy-4-Methoxyphenyl)-1,2-ethanediol 3''-O-t   | C15H22O9    | 345.118446  | Yes |
| 5931 | HMDB0036562; C09771              | Aucubin                                                | C15H22O9    | 345.118446  | Yes |
| 5931 | HMDB0040601                      | (1xi,2xi)-1-(4-Hydroxyphenyl)-1,2,3-propanetriol 2-O-b | C15H22O9    | 345.118446  | Yes |
| 5931 | HMDB0040602                      | (1xi,2xi)-1-(4-Hydroxyphenyl)-1,2,3-propanetriol 3-O-b | C15H22O9    | 345.118446  | Yes |
| 5931 | HMDB0041189                      | 3,4,5-Trimethoxyphenyl glucoside                       | C15H22O9    | 345.118446  | Yes |
| 5933 | HMDB0033222                      | (1R,3S,4S,6R)-6,9-Dihydroxyfenchone 6-O-b-D-glucosic   | C16H26O8    | 345.1557693 | Yes |
| 5933 | HMDB0033223                      | (1S,3R,4R)-8,10-Dihydroxyfenchone 10-O-b-D-glucosid    | C16H26O8    | 345.1557693 | Yes |
| 5933 | HMDB0035822                      | Glucosyl 6-hydroxy-2,6-dimethyl-2E,7-octadienoate      | C16H26O8    | 345.1557693 | Yes |
| 5933 | HMDB0038149                      | Nepetaside                                             | C16H26O8    | 345.1557693 | Yes |
| 5935 | HMDB0029885; CHEBI:1187364       | Sorbitan laurate                                       | C18H34O6    | 345.2287518 | Yes |
| 5964 | HMDB0000045; C00020; CHEBI:16027 | Adenosine monophosphate                                | C10H14N5O7P | 346.0548736 | No  |
| 5964 | HMDB0001044; C00362; CHEBI:16192 | 2''-Deoxyguanosine 5''-monophosphate                   | C10H14N5O7P | 346.0548736 | No  |
| 5964 | HMDB0003540; C01367; CHEBI:28931 | 3''-AMP                                                | C10H14N5O7P | 346.0548736 | No  |
| 5964 | HMDB0011617; C00946; CHEBI:28223 | Adenosine 2''-phosphate                                | C10H14N5O7P | 346.0548736 | No  |
| 5964 | HMDB0059594; C19970; CHEBI:63211 | 2-hydroxy-dAMP                                         | C10H14N5O7P | 346.0548736 | No  |
| 5965 | HMDB0014707; C06895; CHEBI:3534  | Cephalexin                                             | C16H17N3O4S | 346.0874909 | No  |
| 5993 | HMDB0062442; C19592; CHEBI:82583 | alpha-(1,2-Dihydroxyethyl)-1,2,3,4-tetrahydro-7-hydro  | C17H16O8    | 347.076426  | Yes |
| 5993 | HMDB0125025                      | 7-hydroxy-6-methoxy-3-(2,3,5-trihydroxy-4-methoxypl    | C17H16O8    | 347.076426  | Yes |
| 5993 | HMDB0125040                      | 7-hydroxy-6-methoxy-3-(2,3,6-trihydroxy-4-methoxypl    | C17H16O8    | 347.076426  | Yes |
| 5993 | HMDB0125055                      | 3-(2,5-dihydroxy-4-methoxyphenyl)-7,8-dihydroxy-6-m    | C17H16O8    | 347.076426  | Yes |
| 5993 | HMDB0125070                      | 3-(2,5-dihydroxy-4-methoxyphenyl)-5,7-dihydroxy-6-m    | C17H16O8    | 347.076426  | Yes |
| 5993 | HMDB0128201                      | 5,6,7-trihydroxy-2-(4-hydroxy-3,5-dimethoxyphenyl)-3   | C17H16O8    | 347.076426  | Yes |
| 5993 | HMDB0128204                      | 3-(4-hydroxy-3,5-dimethoxyphenyl)-1-(2,3,4,6-tetrahy   | C17H16O8    | 347.076426  | Yes |
| 5993 | HMDB0128218                      | 5,7-dihydroxy-2-(1-hydroxy-3,5-dimethoxy-4-oxocyclol   | C17H16O8    | 347.076426  | Yes |
| 5993 | HMDB0128751                      | 3,5,7-trihydroxy-2-(4-hydroxy-3-methoxyphenyl)-6-me    | C17H16O8    | 347.076426  | Yes |
| 5993 | HMDB0128753                      | 3-(4-hydroxy-3-methoxyphenyl)-1-(2,4,6-trihydroxy-3-i  | C17H16O8    | 347.076426  | Yes |
| 5993 | HMDB0128764                      | 3,5,7-trihydroxy-2-(3-hydroxy-5-methoxyphenyl)-6-me    | C17H16O8    | 347.076426  | Yes |
| 5993 | HMDB0128765                      | 3-(3-hydroxy-5-methoxyphenyl)-1-(2,4,6-trihydroxy-3-i  | C17H16O8    | 347.076426  | Yes |
| 5993 | HMDB0129276                      | 2-(3,4-dimethoxyphenyl)-3,5,7,8-tetrahydroxy-3,4-dih   | C17H16O8    | 347.076426  | Yes |
| 5993 | HMDB0129283                      | 5,7,8-trihydroxy-2-(4-hydroxy-3-methoxyphenyl)-3-me    | C17H16O8    | 347.076426  | Yes |
| 5993 | HMDB0129290                      | 5,7,8-trihydroxy-2-(3-hydroxy-4-methoxyphenyl)-3-me    | C17H16O8    | 347.076426  | Yes |
| 5993 | HMDB0129293                      | 3-(3,4-dimethoxyphenyl)-1-(2,3,4,6-tetrahydroxyphen    | C17H16O8    | 347.076426  | Yes |
| 5993 | HMDB0130264                      | 3,5,7-trihydroxy-2-(3-hydroxy-4-methoxyphenyl)-6-me    | C17H16O8    | 347.076426  | Yes |
| 5993 | HMDB0130265                      | 3-(3-hydroxy-4-methoxyphenyl)-1-(2,4,6-trihydroxy-3-i  | C17H16O8    | 347.076426  | Yes |
| 5993 | HMDB0130267                      | 5,6,7-trihydroxy-2-(3-hydroxy-4-methoxyphenyl)-3-me    | C17H16O8    | 347.076426  | Yes |
| 5993 | HMDB0130272                      | 2-(3,4-dihydroxyphenyl)-5,7-dihydroxy-3,6-dimethoxy-   | C17H16O8    | 347.076426  | Yes |
| 5993 | HMDB0136932                      | 3,5,7-trihydroxy-2-(4-hydroxy-3,5-dimethoxyphenyl)-3   | C17H16O8    | 347.076426  | Yes |
| 5995 | HMDB0033009                      | Foeniculoside VIII                                     | C16H28O8    | 347.1712012 | Yes |
| 5995 | HMDB0033011                      | Foeniculoside IX                                       | C16H28O8    | 347.1712012 | Yes |
| 5995 | HMDB0033219                      | (1S,2S,4R,5S,7S)-2,5,7-Fenchanetriol 2-O-b-D-glucoside | C16H28O8    | 347.1712012 | Yes |
| 5995 | HMDB0033236                      | cis-10-Hydroxylinalyl oxide 7-glucoside                | C16H28O8    | 347.1712012 | Yes |
| 5995 | HMDB0033645                      | (1S,2S,4S,5S)-2,4,7-Thujanetriol 4-glucoside           | C16H28O8    | 347.1712012 | Yes |
| 5995 | HMDB0034786                      | (1S,2S,4S)-1,8-Epoxy-p-menthane-2,7-diol 2-O-b-D-glu   | C16H28O8    | 347.1712012 | Yes |
| 5995 | HMDB0034874                      | Foeniculoside V                                        | C16H28O8    | 347.1712012 | Yes |

|      |                                                |                                                                                                       |              |             |     |
|------|------------------------------------------------|-------------------------------------------------------------------------------------------------------|--------------|-------------|-----|
| 5995 | HMDB0039014                                    | Nepetariaside                                                                                         | C16H28O8     | 347.1712012 | Yes |
| 5995 | HMDB0039469                                    | (1S,2S,4R)-p-Menth-8-ene-1,2,10-triol 2-glucoside                                                     | C16H28O8     | 347.1712012 | Yes |
| 5995 | HMDB0041546                                    | Foeniculoside VII                                                                                     | C16H28O8     | 347.1712012 | Yes |
| 5996 | HMDB0015695; CHEBI:171339                      | Roxatidine acetate                                                                                    | C19H28N2O4   | 347.1984562 | No  |
| 5998 | HMDB0000353                                    | 3b,15b,17a-Trihydroxy-pregnenone                                                                      | C21H32O4     | 347.222954  | Yes |
| 5998 | HMDB0006755; C05478                            | 3a,21-Dihydroxy-5b-pregnane-11,20-dione                                                               | C21H32O4     | 347.222954  | Yes |
| 5998 | HMDB0006757; C05475                            | 11b,21-Dihydroxy-5b-pregnane-3,20-dione                                                               | C21H32O4     | 347.222954  | Yes |
| 5998 | HMDB0006762; HMDB0000382; C05487; CHEBI:171339 | 17alpha,21-Dihydroxypregnenolone                                                                      | C21H32O4     | 347.222954  | Yes |
| 5998 | HMDB0012848                                    | 7''-Carboxy-alpha-chromanol                                                                           | C21H32O4     | 347.222954  | Yes |
| 5998 | HMDB0029475                                    | [10]-Gingerdione                                                                                      | C21H32O4     | 347.222954  | Yes |
| 5998 | HMDB0040641                                    | [8]-Paradyl acetate                                                                                   | C21H32O4     | 347.222954  | Yes |
| 5998 | HMDB0040954                                    | 9alpha-(3-Methyl-2E-pentenoyloxy)-4S-hydroxy-10(14')-hydroxy-10(14')-triol 2-glucoside                | C21H32O4     | 347.222954  | Yes |
| 5998 | HMDB0137416                                    | (4E)-6-hydroxy-1-(4-hydroxy-3-methoxyphenyl)tetradec-4-en-1-ol                                        | C21H32O4     | 347.222954  | Yes |
| 6031 | HMDB0037851                                    | Apigenin 7-sulfate                                                                                    | C15H10O8S    | 349.0025985 | Yes |
| 6031 | HMDB0129972                                    | [4-(5,7-dihydroxy-4-oxo-4H-chromen-3-yl)phenyl]oxide                                                  | C15H10O8S    | 349.0025985 | Yes |
| 6031 | HMDB0133329                                    | [2-hydroxy-5-(7-hydroxy-4-oxo-4H-chromen-2-yl)phenyl]oxide                                            | C15H10O8S    | 349.0025985 | Yes |
| 6031 | HMDB0133354                                    | [3-(6,7-dihydroxy-4-oxo-4H-chromen-2-yl)phenyl]oxide                                                  | C15H10O8S    | 349.0025985 | Yes |
| 6031 | HMDB0133378                                    | [3-(5,7-dihydroxy-4-oxo-4H-chromen-2-yl)phenyl]oxide                                                  | C15H10O8S    | 349.0025985 | Yes |
| 6031 | HMDB0137556                                    | {2-hydroxy-5-[(6-hydroxy-3-oxo-2,3-dihydro-1-benzofuran-2-ylideneamino)oxy]phenyl}oxide               | C15H10O8S    | 349.0025985 | Yes |
| 6033 | HMDB0129500                                    | 2-(2,5-dihydroxy-4-methoxyphenyl)-3,5,6,7-tetrahydro-2H-pyran-4-ol                                    | C16H14O9     | 349.0546704 | Yes |
| 6033 | HMDB0129508                                    | 3-(2,5-dihydroxy-4-methoxyphenyl)-1-(2,3,4,6-tetrahydro-2H-pyran-4-yl)ethan-1-ol                      | C16H14O9     | 349.0546704 | Yes |
| 6033 | HMDB0131887                                    | 3,5,7-trihydroxy-6-methoxy-2-(3,4,5-trihydroxyphenyl)ethan-1-ol                                       | C16H14O9     | 349.0546704 | Yes |
| 6033 | HMDB0131892                                    | 3,5,7-trihydroxy-6-methoxy-2-(2,3,4-trihydroxyphenyl)ethan-1-ol                                       | C16H14O9     | 349.0546704 | Yes |
| 6033 | HMDB0131894                                    | 3,5,7-trihydroxy-6-methoxy-2-(2,4,5-trihydroxyphenyl)ethan-1-ol                                       | C16H14O9     | 349.0546704 | Yes |
| 6035 | HMDB0014561; C08126; CHEBI:27446               | Penicillin V                                                                                          | C16H18N2O5S  | 349.0872605 | No  |
| 6036 | HMDB0001425; C02538; CHEBI:17474               | Estrone sulfate                                                                                       | C18H22O5S    | 349.1111299 | No  |
| 6038 | HMDB0034784                                    | trans-p-Menthane-1,7,8-triol 8-glucoside                                                              | C16H30O8     | 349.1861684 | Yes |
| 6038 | HMDB0039894                                    | (1R,2R,4S)-p-Menthane-1,2,8-triol 8-glucoside                                                         | C16H30O8     | 349.1861684 | Yes |
| 6038 | HMDB0039977                                    | (1S,2R,4R,8S)-p-Menthane-2,8,9-triol 2-glucoside                                                      | C16H30O8     | 349.1861684 | Yes |
| 6038 | HMDB0039978                                    | (1S,2R,4R,8S)-p-Menthane-2,8,9-triol 9-glucoside                                                      | C16H30O8     | 349.1861684 | Yes |
| 6039 | HMDB0002341                                    | 8-iso-15-keto-PGE2                                                                                    | C20H30O5     | 349.2025793 | Yes |
| 6039 | HMDB0002664; C06439; CHEBI:28031               | Prostaglandin E3                                                                                      | C20H30O5     | 349.2025793 | Yes |
| 6039 | HMDB0003034; C13802; CHEBI:34939               | Prostaglandin D3                                                                                      | C20H30O5     | 349.2025793 | Yes |
| 6039 | HMDB0003175; C04707; CHEBI:15547               | 15-Keto-prostaglandin E2                                                                              | C20H30O5     | 349.2025793 | Yes |
| 6039 | HMDB0010410                                    | Resolvin E1                                                                                           | C20H30O5     | 349.2025793 | Yes |
| 6039 | HMDB0012552                                    | 12-Oxo-20-hydroxy-leukotriene B4                                                                      | C20H30O5     | 349.2025793 | Yes |
| 6039 | HMDB0012588                                    | 15-Epi-lipoxin B5                                                                                     | C20H30O5     | 349.2025793 | Yes |
| 6039 | HMDB0012590                                    | 15-Oxo-lipoxin A4                                                                                     | C20H30O5     | 349.2025793 | Yes |
| 6039 | HMDB0012641; CHEBI:63979                       | 20-oxo-leukotriene B4                                                                                 | C20H30O5     | 349.2025793 | Yes |
| 6039 | HMDB0013040; C00427; CHEBI:15554               | PGH3                                                                                                  | C20H30O5     | 349.2025793 | Yes |
| 6039 | HMDB0036701                                    | (ent-6alpha,7alpha,12alpha)-6,7,12-Trihydroxy-16-keto-5,8,11-trimethyl-2-oxo-10-oxa-8-undecanoic acid | C20H30O5     | 349.2025793 | Yes |
| 6039 | HMDB0037593                                    | Oryzalic acid A                                                                                       | C20H30O5     | 349.2025793 | Yes |
| 6039 | HMDB0038693                                    | Oryzalic acid B                                                                                       | C20H30O5     | 349.2025793 | Yes |
| 6039 | HMDB0060096                                    | 5,12,18R-TriHEPE                                                                                      | C20H30O5     | 349.2025793 | Yes |
| 6039 | HMDB0062297; C04758; CHEBI:15557               | 9S-hydroxy-11,15-dioxo-5Z,13E-prostadienoic acid                                                      | C20H30O5     | 349.2025793 | Yes |
| 6039 | HMDB0062300; CHEBI:63992                       | 15-oxo-5S,6R-dihydroxy-7E,9E,11Z,13E-eicosatetraenoic acid                                            | C20H30O5     | 349.2025793 | Yes |
| 6039 | HMDB0062616; CHEBI:91287                       | (5S)-hydroperoxy-18-hydroxy-EPE                                                                       | C20H30O5     | 349.2025793 | Yes |
| 6040 | HMDB0000268; C05476                            | Tetrahydrocorticosterone                                                                              | C21H34O4     | 349.2382471 | No  |
| 6040 | HMDB0000449                                    | 5a-Tetrahydrocorticosterone                                                                           | C21H34O4     | 349.2382471 | No  |
| 6040 | HMDB0005972; C14594                            | Tetrahydrodeoxycortisol                                                                               | C21H34O4     | 349.2382471 | No  |
| 6040 | HMDB0011541                                    | MG(0:0/18:4(6Z,9Z,12Z,15Z)/0:0)                                                                       | C21H34O4     | 349.2382471 | No  |
| 6040 | HMDB0011571                                    | MG(18:4(6Z,9Z,12Z,15Z)/0:0/0:0)                                                                       | C21H34O4     | 349.2382471 | No  |
| 6040 | HMDB0033616; C17496                            | (S)-[10]-Gingerol                                                                                     | C21H34O4     | 349.2382471 | No  |
| 6040 | HMDB0041997; C15368; CHEBI:79870               | Pregnanetriolone                                                                                      | C21H34O4     | 349.2382471 | No  |
| 6052 | HMDB0014952; C08169; CHEBI:120496              | Meloxicam                                                                                             | C14H13N3O4S2 | 350.0277026 | No  |
| 6057 | HMDB0060001; CHEBI:89622                       | Indole-3-acetic-acid-O-glucuronide                                                                    | C16H17NO8    | 350.0885483 | Yes |
| 6059 | HMDB0030388                                    | 9-(beta-D-Ribofuranosyl)zeatin                                                                        | C15H21N5O5   | 350.1462014 | No  |
| 6080 | HMDB0039720                                    | a-L-threo-4-Hex-4-enopyranuronosyl-D-galacturonic acid                                                | C12H16O12    | 351.0571519 | Yes |
| 6082 | HMDB0126417                                    | 6-[(2,2-dimethyl-2H-chromen-5-yl)oxy]-3,4,5-trihydroxy-2H-pyran-4-ol                                  | C17H20O8     | 351.1079935 | Yes |
| 6082 | HMDB0132988                                    | 3,4,5-trihydroxy-6-[4-[(1E)-3-oxopent-1-en-1-yl]phenoxy]ethan-1-ol                                    | C17H20O8     | 351.1079935 | Yes |
| 6082 | HMDB0133688                                    | 3,4,5-trihydroxy-6-[(3-methyl-2-oxo-4-phenylbut-3-en-1-yl)oxy]ethan-1-ol                              | C17H20O8     | 351.1079935 | Yes |

|      |                                  |                                                       |              |             |     |
|------|----------------------------------|-------------------------------------------------------|--------------|-------------|-----|
| 6082 | HMDB0133690                      | 3,4,5-trihydroxy-6-[3-oxo-2-(phenylmethylidene)butox  | C17H20O8     | 351.1079935 | Yes |
| 6082 | HMDB0133692                      | 3,4,5-trihydroxy-6-[3-(2-methyl-3-oxobut-1-en-1-yl)ph | C17H20O8     | 351.1079935 | Yes |
| 6082 | HMDB0133694                      | 3,4,5-trihydroxy-6-[4-(2-methyl-3-oxobut-1-en-1-yl)ph | C17H20O8     | 351.1079935 | Yes |
| 6083 | HMDB0004448; C08357; CHEBI:4866  | Estradiol-17beta 3-sulfate                            | C18H24O5S    | 351.129645  | No  |
| 6086 | HMDB0014909; C07853; CHEBI:3743  | Clidinium                                             | C22H26NO3    | 351.1827905 | Yes |
| 6086 | HMDB0039132                      | [4]-Gingerdiol 3,5-diacetate                          | C19H28O6     | 351.1827905 | Yes |
| 6087 | HMDB0001220; C00584; CHEBI:15551 | Prostaglandin E2                                      | C20H32O5     | 351.2178733 | Yes |
| 6087 | HMDB0001320; C04654; CHEBI:15548 | (13E)-11a-Hydroxy-9,15-dioxoprost-13-enoic acid       | C20H32O5     | 351.2178733 | Yes |
| 6087 | HMDB0001335; C01312; CHEBI:15552 | Prostaglandin I2                                      | C20H32O5     | 351.2178733 | Yes |
| 6087 | HMDB0001381; C00427; CHEBI:15554 | Prostaglandin H2                                      | C20H32O5     | 351.2178733 | Yes |
| 6087 | HMDB0001403; C00696; CHEBI:15555 | Prostaglandin D2                                      | C20H32O5     | 351.2178733 | Yes |
| 6087 | HMDB0001452; C02198; CHEBI:15627 | Thromboxane A2                                        | C20H32O5     | 351.2178733 | Yes |
| 6087 | HMDB0001509; C04853; CHEBI:15646 | 20-Hydroxy-leukotriene B4                             | C20H32O5     | 351.2178733 | Yes |
| 6087 | HMDB0002122; C06476; CHEBI:36075 | Prostaglandin F3a                                     | C20H32O5     | 351.2178733 | Yes |
| 6087 | HMDB0002132                      | 8-iso-PGF3a                                           | C20H32O5     | 351.2178733 | Yes |
| 6087 | HMDB0002363; C13807; CHEBI:34821 | Levuglandin E2                                        | C20H32O5     | 351.2178733 | Yes |
| 6087 | HMDB0002400; C13808; CHEBI:34820 | Levuglandin D2                                        | C20H32O5     | 351.2178733 | Yes |
| 6087 | HMDB0002776; C04671; CHEBI:15550 | 13,14-Dihydro-15-keto-PGE2                            | C20H32O5     | 351.2178733 | Yes |
| 6087 | HMDB0004240; C05960; CHEBI:28442 | 15-Keto-prostaglandin F2a                             | C20H32O5     | 351.2178733 | Yes |
| 6087 | HMDB0004385; C06314; CHEBI:6498  | Lipoxin A4                                            | C20H32O5     | 351.2178733 | Yes |
| 6087 | HMDB0005077                      | 8-iso-15-keto-PGF2a                                   | C20H32O5     | 351.2178733 | Yes |
| 6087 | HMDB0005082; C06315; CHEBI:6499  | Lipoxin B4                                            | C20H32O5     | 351.2178733 | Yes |
| 6087 | HMDB0005844; CHEBI:131888        | 8-isoprostaglandin E2                                 | C20H32O5     | 351.2178733 | Yes |
| 6087 | HMDB0012481; C04671; CHEBI:15550 | (5Z)-(15S)-11alpha-Hydroxy-9,15-dioxoprostanoate      | C20H32O5     | 351.2178733 | Yes |
| 6087 | HMDB0012564                      | 13,14-Dihydro-15-oxo-lipoxin A4                       | C20H32O5     | 351.2178733 | Yes |
| 6087 | HMDB0012587                      | 15-Epi-lipoxin A4                                     | C20H32O5     | 351.2178733 | Yes |
| 6087 | HMDB0034676                      | Cinnassiol D1                                         | C20H32O5     | 351.2178733 | Yes |
| 6087 | HMDB0035064                      | Cinnassiol D4                                         | C20H32O5     | 351.2178733 | Yes |
| 6087 | HMDB0035338                      | Sterebin B                                            | C20H32O5     | 351.2178733 | Yes |
| 6087 | HMDB0035339                      | Sterebin C                                            | C20H32O5     | 351.2178733 | Yes |
| 6087 | HMDB0036756                      | (ent-6alpha,7alpha,16alphaH)-6,7,17-Trihydroxy-19-ka  | C20H32O5     | 351.2178733 | Yes |
| 6087 | HMDB0060041                      | 11b-PGE2                                              | C20H32O5     | 351.2178733 | Yes |
| 6087 | HMDB0060042                      | 13,14-Dihydro-15-keto-PGD2                            | C20H32O5     | 351.2178733 | Yes |
| 6087 | HMDB0062291; CHEBI:63993         | 15-oxo-5S,6R-dihydroxy-7E,9E,11Z-eicosatrienoic acid  | C20H32O5     | 351.2178733 | Yes |
| 6087 | HMDB0062798; CHEBI:90833         | 5-hydroperoxy-15-HETE                                 | C20H32O5     | 351.2178733 | Yes |
| 6088 | HMDB0011539                      | MG(0:0/18:3(6Z,9Z,12Z)/0:0)                           | C21H36O4     | 351.2535494 | No  |
| 6088 | HMDB0011540                      | MG(0:0/18:3(9Z,12Z,15Z)/0:0)                          | C21H36O4     | 351.2535494 | No  |
| 6088 | HMDB0011569                      | MG(18:3(6Z,9Z,12Z)/0:0/0:0)                           | C21H36O4     | 351.2535494 | No  |
| 6088 | HMDB0011570                      | MG(18:3(9Z,12Z,15Z)/0:0/0:0)                          | C21H36O4     | 351.2535494 | No  |
| 6099 | HMDB0032802                      | 4-Hydroxybenzyl isothiocyanate 4''''-acetylramnoside  | C16H19NO6S   | 352.0863415 | No  |
| 6103 | HMDB0060595                      | Olopatadine n-oxide                                   | C21H23NO4    | 352.1533873 | No  |
| 6143 | HMDB0031758                      | Allithiamine                                          | C15H22N4O2S2 | 353.1097443 | Yes |
| 6144 | HMDB0040797                      | Methyl helianthenoate F glucoside                     | C17H22O8     | 353.1256019 | Yes |
| 6144 | HMDB0040898                      | Methyl (R)-8-Hydroxy-9-decene-4,6-dienoate glucoside  | C17H22O8     | 353.1256019 | Yes |
| 6144 | HMDB0126175                      | 3,4,5-trihydroxy-6-[3-hydroxy-2-(3-methylbut-2-en-1-y | C17H22O8     | 353.1256019 | Yes |
| 6144 | HMDB0133001                      | 3,4,5-trihydroxy-6-[4-(3-oxopentyl)phenoxy]oxane-2-c  | C17H22O8     | 353.1256019 | Yes |
| 6144 | HMDB0133204                      | 3,4,5-trihydroxy-6-[5-hydroxy-2-(3-methylbut-2-en-1-y | C17H22O8     | 353.1256019 | Yes |
| 6144 | HMDB0133205                      | 3,4,5-trihydroxy-6-[3-hydroxy-4-(3-methylbut-2-en-1-y | C17H22O8     | 353.1256019 | Yes |
| 6144 | HMDB0133698                      | 3,4,5-trihydroxy-6-[(2-methyl-3-oxo-1-phenylbutan-2-y | C17H22O8     | 353.1256019 | Yes |
| 6144 | HMDB0133699                      | 3,4,5-trihydroxy-6-(2-methyl-3-oxo-1-phenylbutoxy)ox  | C17H22O8     | 353.1256019 | Yes |
| 6144 | HMDB0133701                      | 3,4,5-trihydroxy-6-[3-(2-methyl-3-oxobutyl)phenoxy]o  | C17H22O8     | 353.1256019 | Yes |
| 6144 | HMDB0133703                      | 3,4,5-trihydroxy-6-[4-(2-methyl-3-oxobutyl)phenoxy]o  | C17H22O8     | 353.1256019 | Yes |
| 6144 | HMDB0133705                      | 6-(2-benzyl-3-oxobutoxy)-3,4,5-trihydroxyoxane-2-carl | C17H22O8     | 353.1256019 | Yes |
| 6144 | HMDB0133707                      | 3,4,5-trihydroxy-6-(3-methyl-2-oxo-4-phenylbutoxy)ox  | C17H22O8     | 353.1256019 | Yes |
| 6146 | HMDB0041513                      | Isopropyl apiosylglucoside                            | C14H26O10    | 353.1456068 | Yes |
| 6148 | HMDB0060933                      | Propofol glucuronide                                  | C18H26O7     | 353.1617693 | Yes |
| 6149 | HMDB0031877                      | Acetylsalvipisone                                     | C22H26O4     | 353.1759995 | No  |
| 6149 | HMDB0062319; CHEBI:62840         | 1-dodecanoyl-glycero-3-phosphate                      | C15H31O7P    | 353.1759995 | No  |
| 6149 | HMDB0114763                      | LPA(i-12:0/0:0)                                       | C15H31O7P    | 353.1759995 | No  |
| 6153 | HMDB0001139; C00639; CHEBI:15553 | Prostaglandin F2a                                     | C20H34O5     | 353.2339697 | Yes |
| 6153 | HMDB0001442; C04741; CHEBI:15544 | Prostaglandin E1                                      | C20H34O5     | 353.2339697 | Yes |



|      |                                  |                                                                                       |             |             |     |
|------|----------------------------------|---------------------------------------------------------------------------------------|-------------|-------------|-----|
| 6153 | HMDB0001483; C02314; CHEBI:28922 | Prostaglandin F2b                                                                     | C20H34O5    | 353.2339697 | Yes |
| 6153 | HMDB0001965; C14811; CHEBI:35032 | Troxilin B3                                                                           | C20H34O5    | 353.2339697 | Yes |
| 6153 | HMDB0001977; C14809; CHEBI:36203 | Trioxilin A3                                                                          | C20H34O5    | 353.2339697 | Yes |
| 6153 | HMDB0002115                      | 8-isoprostaglandin PGF2b                                                              | C20H34O5    | 353.2339697 | Yes |
| 6153 | HMDB0004684; C14782              | 11,12,15-THETA                                                                        | C20H34O5    | 353.2339697 | Yes |
| 6153 | HMDB0004685; CHEBI:63976         | 13,14-Dihydro-15-keto PGF2a                                                           | C20H34O5    | 353.2339697 | Yes |
| 6153 | HMDB0004686                      | 8-Isoprostaglandin E1                                                                 | C20H34O5    | 353.2339697 | Yes |
| 6153 | HMDB0004694; C14814              | 11,14,15-THETA                                                                        | C20H34O5    | 353.2339697 | Yes |
| 6153 | HMDB0005083; C13809; CHEBI:34505 | 8-Isoprostaglandin F2a                                                                | C20H34O5    | 353.2339697 | Yes |
| 6153 | HMDB0005102; C06438; CHEBI:27696 | Prostaglandin D1                                                                      | C20H34O5    | 353.2339697 | Yes |
| 6153 | HMDB0006562                      | 8-iso-13,14-dihydro-15-keto-PGF2a                                                     | C20H34O5    | 353.2339697 | Yes |
| 6153 | HMDB0010170                      | 11,12,15-TriHETRE                                                                     | C20H34O5    | 353.2339697 | Yes |
| 6153 | HMDB0010199; C05959; CHEBI:27595 | 11b-PGF2a                                                                             | C20H34O5    | 353.2339697 | Yes |
| 6153 | HMDB0011137; C05959; CHEBI:27595 | 11-Epi-PGF2a                                                                          | C20H34O5    | 353.2339697 | Yes |
| 6153 | HMDB0012563                      | 13,14-Dihydro- lipoxin A4                                                             | C20H34O5    | 353.2339697 | Yes |
| 6153 | HMDB0013041                      | Prostaglandin H1                                                                      | C20H34O5    | 353.2339697 | Yes |
| 6153 | HMDB0035380                      | Sterebin G                                                                            | C20H34O5    | 353.2339697 | Yes |
| 6153 | HMDB0060045; CHEBI:72593         | 15-keto-PGF1alpha                                                                     | C20H34O5    | 353.2339697 | Yes |
| 6153 | HMDB0060107; CHEBI:15630         | (5Z,9E,12S,14Z)-8,11,12-Trihydroxyicosa-5,9,14-trienoic acid                          | C20H34O5    | 353.2339697 | Yes |
| 6153 | HMDB0062278                      | 11,12,15-trihydroxyeicosatrienoic acid                                                | C20H34O5    | 353.2339697 | Yes |
| 6155 | HMDB0001160; CHEBI:42394         | Tricosanoic acid                                                                      | C23H46O2    | 353.3431536 | No  |
| 6155 | HMDB0035638                      | 6-Hydroxy-8-tricosanone                                                               | C23H46O2    | 353.3431536 | No  |
| 6155 | HMDB0035642                      | 8-Hydroxy-6-tricosanone                                                               | C23H46O2    | 353.3431536 | No  |
| 6155 | HMDB0035649                      | 4-Hydroxy-6-tricosanone                                                               | C23H46O2    | 353.3431536 | No  |
| 6155 | HMDB0035650                      | 6-Hydroxy-4-tricosanone                                                               | C23H46O2    | 353.3431536 | No  |
| 6174 | HMDB0000988; C01137; CHEBI:15625 | S-Adenosylmethioninamine                                                              | C14H23N6O3S | 354.1489139 | Yes |
| 6178 | HMDB0033449                      | Pipercide                                                                             | C22H29NO3   | 354.207179  | No  |
| 6178 | HMDB0144279                      | 4-(dimethylamino)-4-hydroxy-3-methyl-1,2-diphenylbutane                               | C22H29NO3   | 354.207179  | No  |
| 6178 | HMDB0144280                      | 4-(dimethylamino)-3-hydroxy-3-methyl-1,2-diphenylbutane                               | C22H29NO3   | 354.207179  | No  |
| 6178 | HMDB0144282                      | 4-(dimethylamino)-1-hydroxy-3-methyl-1,2-diphenylbutane                               | C22H29NO3   | 354.207179  | No  |
| 6178 | HMDB0144283                      | 4-(dimethylamino)-2-(3-hydroxyphenyl)-3-methyl-1-phenylbutane                         | C22H29NO3   | 354.207179  | No  |
| 6178 | HMDB0144284                      | 4-(dimethylamino)-1-(3-hydroxyphenyl)-3-methyl-2-phenylbutane                         | C22H29NO3   | 354.207179  | No  |
| 6178 | HMDB0144285                      | 4-(dimethylamino)-2-(4-hydroxyphenyl)-3-methyl-1-phenylbutane                         | C22H29NO3   | 354.207179  | No  |
| 6178 | HMDB0144286                      | 4-(dimethylamino)-1-(4-hydroxyphenyl)-3-methyl-2-phenylbutane                         | C22H29NO3   | 354.207179  | No  |
| 6178 | HMDB0144287                      | 4-(dimethylamino)-3-methyl-1,2-diphenylbutane-2-yl 2-phenylbutane-2-yl                | C22H29NO3   | 354.207179  | No  |
| 6178 | HMDB0144288                      | 3-[(dimethylamino)methyl]-4-hydroxy-1,2-diphenylbutane                                | C22H29NO3   | 354.207179  | No  |
| 6178 | HMDB0144289                      | 4-(dimethylamino)-3-methyl-1,2-diphenylbutane-2-yl 3-phenylbutane-2-yl                | C22H29NO3   | 354.207179  | No  |
| 6178 | HMDB0144290                      | 4-(dimethylamino)-2-(2-hydroxyphenyl)-3-methyl-1-phenylbutane                         | C22H29NO3   | 354.207179  | No  |
| 6178 | HMDB0144291                      | 4-(dimethylamino)-1-(2-hydroxyphenyl)-3-methyl-2-phenylbutane                         | C22H29NO3   | 354.207179  | No  |
| 6178 | HMDB0144292                      | 4-(dimethyl-oxo-??-azanyl)-3-methyl-1,2-diphenylbutane                                | C22H29NO3   | 354.207179  | No  |
| 6196 | HMDB0036617                      | (+)-Chebularic acid                                                                   | C14H12O11   | 355.0294836 | Yes |
| 6198 | HMDB0127752                      | {3-[2-hydroxy-3-(2,4,6-trihydroxyphenyl)propyl]phenyl}phenyl                          | C15H16O8S   | 355.0501836 | No  |
| 6198 | HMDB0127753                      | {[1-(3-hydroxyphenyl)-3-(2,4,6-trihydroxyphenyl)propyl]phenyl}phenyl                  | C15H16O8S   | 355.0501836 | No  |
| 6198 | HMDB0128653                      | {[4-(7-hydroxy-8-methoxy-2-oxo-2H-chromen-6-yl)-2-naphthyl]phenyl}phenyl              | C15H16O8S   | 355.0501836 | No  |
| 6198 | HMDB0132699                      | {[3-[(7-methoxy-2-oxo-2H-chromen-8-yl)methyl]-2-methylphenyl]phenyl}phenyl            | C15H16O8S   | 355.0501836 | No  |
| 6198 | HMDB0132708                      | {[1-(6-hydroxy-7-methoxy-2-oxo-2H-chromen-8-yl)-3-naphthyl]phenyl}phenyl              | C15H16O8S   | 355.0501836 | No  |
| 6198 | HMDB0132713                      | [3-hydroxy-4-(7-methoxy-2-oxo-2H-chromen-8-yl)-2-methylphenyl]phenyl                  | C15H16O8S   | 355.0501836 | No  |
| 6198 | HMDB0132714                      | {[4-hydroxy-1-(7-methoxy-2-oxo-2H-chromen-8-yl)-3-naphthyl]phenyl}phenyl              | C15H16O8S   | 355.0501836 | No  |
| 6198 | HMDB0132717                      | {[2-hydroxy-1-(7-methoxy-2-oxo-2H-chromen-8-yl)-3-naphthyl]phenyl}phenyl              | C15H16O8S   | 355.0501836 | No  |
| 6198 | HMDB0132718                      | {[1-hydroxy-1-(7-methoxy-2-oxo-2H-chromen-8-yl)-3-naphthyl]phenyl}phenyl              | C15H16O8S   | 355.0501836 | No  |
| 6198 | HMDB0132720                      | [2-(7-methoxy-2-oxo-2H-chromen-8-yl)-1-(2-methoxyphenyl)phenyl]phenyl                 | C15H16O8S   | 355.0501836 | No  |
| 6200 | HMDB0029938                      | Acaciaburonic acid                                                                    | C12H20O12   | 355.0890137 | No  |
| 6200 | HMDB0039722                      | 2-O-beta-D-Glucopyranuronosyl-D-mannose                                               | C12H20O12   | 355.0890137 | No  |
| 6200 | HMDB0039724                      | 4-O-alpha-D-Glucopyranuronosyl-D-galactose                                            | C12H20O12   | 355.0890137 | No  |
| 6200 | HMDB0039726                      | 3-O-beta-D-Galactopyranuronosyl-D-galactose                                           | C12H20O12   | 355.0890137 | No  |
| 6200 | HMDB0125609                      | 6-[[[4,5-dihydroxy-2,5-bis(hydroxymethyl)oxolan-3-yl]oxy]phenyl]phenyl                | C12H20O12   | 355.0890137 | No  |
| 6200 | HMDB0125610                      | 6-[[[2,4-dihydroxy-2,5-bis(hydroxymethyl)oxolan-3-yl]oxy]phenyl]phenyl                | C12H20O12   | 355.0890137 | No  |
| 6200 | HMDB0125611                      | 3,4,5-trihydroxy-6-[[[2,3,4-trihydroxy-5-(hydroxymethyl)oxolan-3-yl]oxy]phenyl]phenyl | C12H20O12   | 355.0890137 | No  |
| 6200 | HMDB0125612                      | 3,4,5-trihydroxy-6-[[[3,4,5-trihydroxy-5-(hydroxymethyl)oxolan-3-yl]oxy]phenyl]phenyl | C12H20O12   | 355.0890137 | No  |
| 6201 | HMDB0031695                      | xi-3-Hydroxy-5-phenylpentanoic acid O-beta-D-Glucopyranoside                          | C17H24O8    | 355.1398382 | No  |
| 6201 | HMDB0040558                      | Zingerone glucoside                                                                   | C17H24O8    | 355.1398382 | No  |

|      |                                  |                                                                     |             |             |     |
|------|----------------------------------|---------------------------------------------------------------------|-------------|-------------|-----|
| 6203 | HMDB0035099                      | gamma-Crocetin                                                      | C22H28O4    | 355.1919214 | No  |
| 6203 | HMDB0040634                      | Piperochromanoic acid                                               | C22H28O4    | 355.1919214 | No  |
| 6204 | HMDB0041044                      | 5,7-Megastigmadien-9-ol glucoside                                   | C19H32O6    | 355.2124598 | No  |
| 6205 | HMDB0041882                      | Dopexamine                                                          | C22H32N2O2  | 355.241694  | No  |
| 6206 | HMDB0002685; C06475; CHEBI:28852 | Prostaglandin F1a                                                   | C20H36O5    | 355.2493986 | No  |
| 6206 | HMDB0002689; CHEBI:1000694       | 13,14-Dihydro PGE1                                                  | C20H36O5    | 355.2493986 | No  |
| 6206 | HMDB0004239                      | 13,14-Dihydro PGF2a                                                 | C20H36O5    | 355.2493986 | No  |
| 6224 | HMDB0029833; CHEBI:134458        | Cyclodopa glucoside                                                 | C15H19NO9   | 356.0986808 | No  |
| 6224 | HMDB0037263                      | HMBOA-Glc                                                           | C15H19NO9   | 356.0986808 | No  |
| 6224 | HMDB0240215; CHEBI:133005        | 2-Methoxyacetaminophen glucuronide                                  | C15H19NO9   | 356.0986808 | No  |
| 6225 | HMDB0031944                      | Niazimicin A                                                        | C16H23NO6S  | 356.1173563 | Yes |
| 6233 | HMDB0094648                      | Leu-Leu-Leu                                                         | C18H35N3O4  | 356.2549344 | No  |
| 6250 | HMDB0132923                      | (2-hydroxy-2-[9-hydroxy-7-oxo-2H,3H,7H-furo[3,2-g]c                 | C14H14O9S   | 357.0308579 | No  |
| 6250 | HMDB0132925                      | [9-hydroxy-2-(2-hydroxypropan-2-yl)-7-oxo-2H,3H,7H-                 | C14H14O9S   | 357.0308579 | No  |
| 6252 | HMDB0041720                      | Dihydrocaffeic acid 3-O-glucuronide                                 | C15H18O10   | 357.0831058 | Yes |
| 6252 | HMDB0124979                      | 6-[4-(2-carboxyethyl)-2-hydroxyphenoxy]-3,4,5-trihydr               | C15H18O10   | 357.0831058 | Yes |
| 6252 | HMDB0124980                      | 6-[5-(2-carboxyethyl)-2-hydroxyphenoxy]-3,4,5-trihydr               | C15H18O10   | 357.0831058 | Yes |
| 6252 | HMDB0124981                      | 6-[[3-(3,4-dihydroxyphenyl)propanoyl]oxy]-3,4,5-trihydr             | C15H18O10   | 357.0831058 | Yes |
| 6252 | HMDB0126431                      | 6-[4-(2-carboxyethyl)-3-hydroxyphenoxy]-3,4,5-trihydr               | C15H18O10   | 357.0831058 | Yes |
| 6252 | HMDB0126432                      | 6-[2-(2-carboxyethyl)-5-hydroxyphenoxy]-3,4,5-trihydr               | C15H18O10   | 357.0831058 | Yes |
| 6252 | HMDB0126433                      | 6-[[3-(2,4-dihydroxyphenyl)propanoyl]oxy]-3,4,5-trihydr             | C15H18O10   | 357.0831058 | Yes |
| 6252 | HMDB0128026                      | 6-[3-(2-carboxyethyl)-5-hydroxyphenoxy]-3,4,5-trihydr               | C15H18O10   | 357.0831058 | Yes |
| 6252 | HMDB0128027                      | 6-[[3-(3,5-dihydroxyphenyl)propanoyl]oxy]-3,4,5-trihydr             | C15H18O10   | 357.0831058 | Yes |
| 6252 | HMDB0133881                      | 6-[2-(1-carboxyethyl)-5-hydroxyphenoxy]-3,4,5-trihydr               | C15H18O10   | 357.0831058 | Yes |
| 6252 | HMDB0133882                      | 6-[4-(1-carboxyethyl)-3-hydroxyphenoxy]-3,4,5-trihydr               | C15H18O10   | 357.0831058 | Yes |
| 6252 | HMDB0133883                      | 6-[[3-(2,4-dihydroxyphenyl)propanoyl]oxy]-3,4,5-trihydr             | C15H18O10   | 357.0831058 | Yes |
| 6252 | HMDB0134096                      | 6-[3-(2-carboxyethyl)-2-hydroxyphenoxy]-3,4,5-trihydr               | C15H18O10   | 357.0831058 | Yes |
| 6252 | HMDB0134097                      | 6-[2-(2-carboxyethyl)-6-hydroxyphenoxy]-3,4,5-trihydr               | C15H18O10   | 357.0831058 | Yes |
| 6252 | HMDB0134098                      | 6-[[3-(2,3-dihydroxyphenyl)propanoyl]oxy]-3,4,5-trihydr             | C15H18O10   | 357.0831058 | Yes |
| 6252 | HMDB0134106                      | 6-[3-(2-carboxyethyl)-4-hydroxyphenoxy]-3,4,5-trihydr               | C15H18O10   | 357.0831058 | Yes |
| 6252 | HMDB0134107                      | 6-[2-(2-carboxyethyl)-4-hydroxyphenoxy]-3,4,5-trihydr               | C15H18O10   | 357.0831058 | Yes |
| 6252 | HMDB0134108                      | 6-[[3-(2,5-dihydroxyphenyl)propanoyl]oxy]-3,4,5-trihydr             | C15H18O10   | 357.0831058 | Yes |
| 6254 | HMDB0029651                      | Phlorisobutyrophenone 2-glucoside                                   | C16H22O9    | 357.1189145 | Yes |
| 6260 | HMDB0033443                      | Sorgoleone 358                                                      | C22H30O4    | 357.2078923 | No  |
| 6260 | HMDB0035856                      | 11,12-Dimethoxy-8,11,13-abietatrien-20,7-olide                      | C22H30O4    | 357.2078923 | No  |
| 6260 | HMDB0040619                      | Piperoic acid                                                       | C22H30O4    | 357.2078923 | No  |
| 6263 | HMDB0005076; CHEBI:155467        | 13,14-Dihydro PGF-1a                                                | C20H38O5    | 357.265047  | No  |
| 6278 | HMDB0034070; C08427; CHEBI:9162  | Sinigrin                                                            | C10H17NO9S2 | 358.02595   | No  |
| 6281 | HMDB0030934; C08342              | Triglochinin                                                        | C14H17NO10  | 358.0772101 | Yes |
| 6282 | HMDB0010336                      | Epinephrine glucuronide                                             | C15H21NO9   | 358.1148432 | Yes |
| 6282 | HMDB0029452                      | L-DOPA 3''-glucoside                                                | C15H21NO9   | 358.1148432 | Yes |
| 6284 | HMDB0135480                      | N-[2-(3,4-dimethoxyphenyl)ethyl]-3-(3-hydroxy-4-methoxyphenyl)      | C20H25NO5   | 358.1657103 | No  |
| 6284 | HMDB0135481                      | 3-(3,4-dimethoxyphenyl)-N-[2-(4-hydroxy-3-methoxyphenyl)]           | C20H25NO5   | 358.1657103 | No  |
| 6284 | HMDB0135482                      | 3-(3,4-dimethoxyphenyl)-N-[2-(3-hydroxy-4-methoxyphenyl)]           | C20H25NO5   | 358.1657103 | No  |
| 6284 | HMDB0135483                      | N-[2-(3,4-dimethoxyphenyl)ethyl]-3-(4-hydroxy-3-methoxyphenyl)      | C20H25NO5   | 358.1657103 | No  |
| 6299 | HMDB0000496; C03033              | 3-Methoxy-4-hydroxyphenylglycol glucuronide                         | C15H20O10   | 359.0991171 | Yes |
| 6299 | HMDB0035476                      | 6''-Methoxypolygoacetophenoxide                                     | C15H20O10   | 359.0991171 | Yes |
| 6300 | HMDB0034626                      | 1-(3,4-Dimethoxyphenyl)-1,2-ethanediol 1-O-b-D-glucuronide          | C16H24O9    | 359.1351358 | Yes |
| 6300 | HMDB0034627                      | 1-(3,4-Dimethoxyphenyl)-1,2-ethanediol 2-O-b-D-glucuronide          | C16H24O9    | 359.1351358 | Yes |
| 6300 | HMDB0037028; C11647              | Deoxyloganic acid                                                   | C16H24O9    | 359.1351358 | Yes |
| 6300 | HMDB0038381                      | 2-(4-Hydroxy-3,5-dimethoxyphenyl)ethanol 4''-glucuronide            | C16H24O9    | 359.1351358 | Yes |
| 6300 | HMDB0039473                      | 2''-Methoxy-3-(2,4-dihydroxyphenyl)-1,2-propanediol 1-O-glucuronide | C16H24O9    | 359.1351358 | Yes |
| 6301 | HMDB0032717                      | Lepidine C                                                          | C21H20N4O2  | 359.1536324 | No  |
| 6301 | HMDB0033437; CHEBI:48983         | Lepidine                                                            | C21H20N4O2  | 359.1536324 | No  |
| 6314 | HMDB0014010; CHEBI:63840         | 5-Hydroxyomeprazole                                                 | C17H19N3O4S | 360.1022645 | No  |
| 6314 | HMDB0014012; CHEBI:388428        | Omeprazole sulfone                                                  | C17H19N3O4S | 360.1022645 | No  |
| 6314 | HMDB0014013                      | 3-Hydroxyomeprazole                                                 | C17H19N3O4S | 360.1022645 | No  |
| 6314 | HMDB0061091                      | 5-hydroxyomeprazole                                                 | C17H19N3O4S | 360.1022645 | No  |
| 6333 | HMDB0134656                      | [(5-oxo-1,7-diphenylheptan-2-yl)oxy]sulfonic acid                   | C19H22O5S   | 361.1141566 | Yes |
| 6333 | HMDB0134658                      | [(5-oxo-1,7-diphenylheptan-3-yl)oxy]sulfonic acid                   | C19H22O5S   | 361.1141566 | Yes |
| 6333 | HMDB0134660                      | [(3-oxo-1,7-diphenylheptan-4-yl)oxy]sulfonic acid                   | C19H22O5S   | 361.1141566 | Yes |

|      |                                   |                                                                 |             |             |     |
|------|-----------------------------------|-----------------------------------------------------------------|-------------|-------------|-----|
| 6333 | HMDB0134662                       | [(3-oxo-1,7-diphenylheptan-2-yl)oxy]sulfonic acid               | C19H22O5S   | 361.1141566 | Yes |
| 6333 | HMDB0134664                       | [(5-oxo-1,7-diphenylheptyl)oxy]sulfonic acid                    | C19H22O5S   | 361.1141566 | Yes |
| 6333 | HMDB0134666                       | [(3-oxo-1,7-diphenylheptyl)oxy]sulfonic acid                    | C19H22O5S   | 361.1141566 | Yes |
| 6333 | HMDB0134668                       | [3-(5-oxo-7-phenylheptyl)phenyl]oxidanesulfonic acid            | C19H22O5S   | 361.1141566 | Yes |
| 6333 | HMDB0134670                       | [3-(3-oxo-7-phenylheptyl)phenyl]oxidanesulfonic acid            | C19H22O5S   | 361.1141566 | Yes |
| 6333 | HMDB0134672                       | [4-(5-oxo-7-phenylheptyl)phenyl]oxidanesulfonic acid            | C19H22O5S   | 361.1141566 | Yes |
| 6333 | HMDB0134674                       | [4-(3-oxo-7-phenylheptyl)phenyl]oxidanesulfonic acid            | C19H22O5S   | 361.1141566 | Yes |
| 6337 | HMDB0000063; C00735               | Cortisol                                                        | C21H30O5    | 361.2044078 | No  |
| 6337 | HMDB0000319; C01124; CHEBI:16485  | 18-Hydroxycorticosterone                                        | C21H30O5    | 361.2044078 | No  |
| 6337 | HMDB0006758; C05469; CHEBI:18093  | 17a,21-Dihydroxy-5b-pregnane-3,11,20-trione                     | C21H30O5    | 361.2044078 | No  |
| 6337 | HMDB0014879; C00735; CHEBI:17650  | Hydrocortisone                                                  | C21H30O5    | 361.2044078 | No  |
| 6337 | HMDB0030026                       | Isohumulone A                                                   | C21H30O5    | 361.2044078 | No  |
| 6337 | HMDB0030138                       | Adhumulone                                                      | C21H30O5    | 361.2044078 | No  |
| 6337 | HMDB0032095                       | 5-Hydroxy-4-methoxy-5-(1-oxo-9,12,15-hexadecatrien-1-yl)-       | C21H30O5    | 361.2044078 | No  |
| 6337 | HMDB0034090                       | (R)-Humulone                                                    | C21H30O5    | 361.2044078 | No  |
| 6342 | HMDB0038380                       | Triton X 100                                                    | C24H42O2    | 361.3121263 | No  |
| 6357 | HMDB0001397; C00144; CHEBI:17345  | Guanosine monophosphate                                         | C10H14N5O8P | 362.0523786 | No  |
| 6357 | HMDB0011670                       | 8-Oxo-dGMP                                                      | C10H14N5O8P | 362.0523786 | No  |
| 6357 | HMDB0059639; C18239; CHEBI:60210  | Cyclic pyranopterin monophosphate                               | C10H14N5O8P | 362.0523786 | No  |
| 6358 | HMDB0015271; C06878; CHEBI:3479   | Cefadroxil                                                      | C16H17N3O5S | 362.0840454 | No  |
| 6360 | HMDB0041143                       | 8-Methyldihydrochelerythrine                                    | C22H21NO4   | 362.1425288 | No  |
| 6383 | HMDB0060982                       | hydroxytorsemide                                                | C16H20N4O4S | 363.1122508 | No  |
| 6387 | HMDB0012550                       | 12-Oxo-20-carboxy-leukotriene B4                                | C20H28O6    | 363.1812409 | Yes |
| 6387 | HMDB0030899                       | Eremopetasitenin A1                                             | C20H28O6    | 363.1812409 | Yes |
| 6387 | HMDB0035168; C17642               | Cinnassiol C2                                                   | C20H28O6    | 363.1812409 | Yes |
| 6387 | HMDB0036665                       | Blumealactone A                                                 | C20H28O6    | 363.1812409 | Yes |
| 6387 | HMDB0036666                       | Blumealactone B                                                 | C20H28O6    | 363.1812409 | Yes |
| 6387 | HMDB0036944                       | Gibberellin A123                                                | C20H28O6    | 363.1812409 | Yes |
| 6387 | HMDB0038746                       | Gibberellin A74                                                 | C20H28O6    | 363.1812409 | Yes |
| 6387 | HMDB0040757                       | 3b,8a-Dihydroxy-6b-angeloyloxy-7(11)-eremophilen-1-ol           | C20H28O6    | 363.1812409 | Yes |
| 6387 | HMDB0040758                       | 3b,8b-Dihydroxy-6b-angeloyloxy-7(11)-eremophilen-1-ol           | C20H28O6    | 363.1812409 | Yes |
| 6387 | HMDB0041226                       | 3b,9b-Dihydroxy-6b-angeloyloxy-7(11)-eremophilen-1-ol           | C20H28O6    | 363.1812409 | Yes |
| 6387 | HMDB0041279                       | 3b-Hydroxy-6b-(2,3-epoxy-2-methylbutanoyloxy)-7(11)-ol          | C20H28O6    | 363.1812409 | Yes |
| 6387 | HMDB0041348                       | Gibberellin A100                                                | C20H28O6    | 363.1812409 | Yes |
| 6387 | HMDB0041496                       | Gibberellin A97                                                 | C20H28O6    | 363.1812409 | Yes |
| 6387 | HMDB0059992; CHEBI:88747          | 5-(4''-Hydroxyphenyl)-gamma-valerolactone-4''-O-glucoside       | C20H28O6    | 363.1812409 | Yes |
| 6390 | HMDB0000903                       | Tetrahydrocortisone                                             | C21H32O5    | 363.219541  | No  |
| 6390 | HMDB0003259; C05471               | Dihydrocortisol                                                 | C21H32O5    | 363.219541  | No  |
| 6390 | HMDB0006753; C05474               | 3a,11b,21-Trihydroxy-20-oxo-5b-pregnan-18-al                    | C21H32O5    | 363.219541  | No  |
| 6390 | HMDB0006754; C05473               | 11b,21-Dihydroxy-3,20-oxo-5b-pregnan-18-al                      | C21H32O5    | 363.219541  | No  |
| 6390 | HMDB0006760; C05489               | 11b,17a,21-Trihydroxypreg-nenolone                              | C21H32O5    | 363.219541  | No  |
| 6390 | HMDB0013157                       | 18-Hydroxy-11-dehydrotetrahydrocorticosterone                   | C21H32O5    | 363.219541  | No  |
| 6390 | HMDB0032553                       | Vanillin 3-(L-menthoxy)propane-1,2-diol acetal                  | C21H32O5    | 363.219541  | No  |
| 6393 | HMDB0036803                       | 6-O-Acetylaustroinulin                                          | C22H36O4    | 363.2521799 | No  |
| 6393 | HMDB0036804                       | 7-O-Acetylaustroinulin                                          | C22H36O4    | 363.2521799 | No  |
| 6405 | HMDB0012622                       | 2-Hydroxyestrone sulfate                                        | C18H21O6S   | 364.0979907 | No  |
| 6405 | HMDB0015193; C06827; CHEBI:2676   | Amoxicillin                                                     | C16H19N3O5S | 364.0979907 | No  |
| 6405 | HMDB0030500; C06827; CHEBI:323183 | Amoxycillin                                                     | C16H19N3O5S | 364.0979907 | No  |
| 6407 | HMDB0013958                       | 5-O-Desmethyldonepezil                                          | C23H27NO3   | 364.1925371 | No  |
| 6407 | HMDB0013959                       | 6-O-Desmethyldonepezil                                          | C23H27NO3   | 364.1925371 | No  |
| 6407 | HMDB0040775                       | Aegle marmelos Alkaloid C                                       | C23H27NO3   | 364.1925371 | No  |
| 6434 | HMDB0029992                       | Tetrahydropentoxylone                                           | C17H22N2O7  | 365.135785  | No  |
| 6434 | HMDB0033108                       | Semilepidinoside B                                              | C17H22N2O7  | 365.135785  | No  |
| 6435 | HMDB0035104; C09662               | Diacetoxyscirpenol                                              | C19H26O7    | 365.160185  | Yes |
| 6435 | HMDB0038282                       | 4-Acetyl-2-prenylphenol glucoside                               | C19H26O7    | 365.160185  | Yes |
| 6435 | HMDB0041364                       | Secoeremopetasitolide A                                         | C19H26O7    | 365.160185  | Yes |
| 6436 | HMDB0033216                       | (2R,6x)-7-Methyl-3-methylene-1,2,6,7-octanetetrol 2-O-glucoside | C16H30O9    | 365.1826491 | Yes |
| 6436 | HMDB0039975                       | (1S,2S,4R,8S)-p-Menthane-1,2,8,9-tetrol 2-glucoside             | C16H30O9    | 365.1826491 | Yes |
| 6436 | HMDB0039976                       | (1R*,2R*,4R*,8S*)-p-Menthane-1,2,8,9-tetrol 9-glucoside         | C16H30O9    | 365.1826491 | Yes |
| 6437 | HMDB0006059; C05950; CHEBI:27562  | 20-Carboxy-leukotriene B4                                       | C20H30O6    | 365.1961178 | Yes |
| 6437 | HMDB0012549                       | 12-oxo-10,11-dihydro-20-COOH-LTB4                               | C20H30O6    | 365.1961178 | Yes |

|      |                                  |                                                                               |             |             |     |
|------|----------------------------------|-------------------------------------------------------------------------------|-------------|-------------|-----|
| 6437 | HMDB0012551                      | 12-oxo-20-dihydroxy-leukotriene B4                                            | C20H30O6    | 365.1961178 | Yes |
| 6437 | HMDB0036863                      | Anhydrocinnzeylanol                                                           | C20H30O6    | 365.1961178 | Yes |
| 6437 | HMDB0037062                      | Sporotrichiol                                                                 | C20H30O6    | 365.1961178 | Yes |
| 6440 | HMDB0000314                      | 3b-Allotetrahydrocortisol                                                     | C21H34O5    | 365.2333752 | No  |
| 6440 | HMDB0000526                      | 5a-Tetrahydrocortisol                                                         | C21H34O5    | 365.2333752 | No  |
| 6440 | HMDB0000949; C05472              | Tetrahydrocortisol                                                            | C21H34O5    | 365.2333752 | No  |
| 6440 | HMDB0003128; C05481; CHEBI:3899  | Cortolone                                                                     | C21H34O5    | 365.2333752 | No  |
| 6440 | HMDB0013221; C05481              | Beta-Cortolone                                                                | C21H34O5    | 365.2333752 | No  |
| 6441 | HMDB0000314                      | 3b-Allotetrahydrocortisol                                                     | C21H34O5    | 365.2338599 | No  |
| 6441 | HMDB0000526                      | 5a-Tetrahydrocortisol                                                         | C21H34O5    | 365.2338599 | No  |
| 6441 | HMDB0000949; C05472              | Tetrahydrocortisol                                                            | C21H34O5    | 365.2338599 | No  |
| 6441 | HMDB0003128; C05481; CHEBI:3899  | Cortolone                                                                     | C21H34O5    | 365.2338599 | No  |
| 6441 | HMDB0013221; C05481              | Beta-Cortolone                                                                | C21H34O5    | 365.2338599 | No  |
| 6444 | HMDB0002368; C08323; CHEBI:44247 | Nervonic acid                                                                 | C24H46O2    | 365.3424306 | No  |
| 6444 | HMDB0029799                      | (E)-2-Tetracosenoic acid                                                      | C24H46O2    | 365.3424306 | No  |
| 6444 | HMDB0035559                      | 10,12-Tetracosanedione                                                        | C24H46O2    | 365.3424306 | No  |
| 6444 | HMDB0035560                      | 7,9-Tetracosanedione                                                          | C24H46O2    | 365.3424306 | No  |
| 6444 | HMDB0035561                      | 6,8-Tetracosanedione                                                          | C24H46O2    | 365.3424306 | No  |
| 6444 | HMDB0035562                      | 5,7-Tetracosanedione                                                          | C24H46O2    | 365.3424306 | No  |
| 6444 | HMDB0035563                      | 4,6-Tetracosanedione                                                          | C24H46O2    | 365.3424306 | No  |
| 6478 | HMDB0128633                      | 3,4,5-trihydroxy-6-[[3-(hydroxymethyl)-1-oxo-1H-isoch C16H16O10               |             | 367.0682889 | Yes |
| 6478 | HMDB0128635                      | 3,4,5-trihydroxy-6-[[3-(hydroxymethyl)-1-oxo-1H-isoch C16H16O10               |             | 367.0682889 | Yes |
| 6478 | HMDB0128637                      | 3,4,5-trihydroxy-6-[[3-(hydroxymethyl)-1-oxo-1H-isoch C16H16O10               |             | 367.0682889 | Yes |
| 6478 | HMDB0129409                      | 3,4,5-trihydroxy-6-[4-methoxy-1-benzofuran-5-carbon C16H16O10                 |             | 367.0682889 | Yes |
| 6478 | HMDB0132250                      | 3,4,5-trihydroxy-6-[[6-methoxy-2-oxo-2H-chromen-7-y C16H16O10                 |             | 367.0682889 | Yes |
| 6478 | HMDB0136768                      | 3,4,5-trihydroxy-6-[[6-hydroxy-4-methyl-2-oxo-2H-chr C16H16O10                |             | 367.0682889 | Yes |
| 6478 | HMDB0136769                      | 3,4,5-trihydroxy-6-[[4-(hydroxymethyl)-2-oxo-2H-chro C16H16O10                |             | 367.0682889 | Yes |
| 6478 | HMDB0136772                      | 3,4,5-trihydroxy-6-[[8-hydroxy-4-methyl-2-oxo-2H-chr C16H16O10                |             | 367.0682889 | Yes |
| 6478 | HMDB0136774                      | 3,4,5-trihydroxy-6-[[5-hydroxy-4-methyl-2-oxo-2H-chr C16H16O10                |             | 367.0682889 | Yes |
| 6479 | HMDB0030669                      | 3-O-Feruloylquinic acid                                                       | C17H20O9    | 367.104789  | No  |
| 6479 | HMDB0039959                      | 3-O-Caffeoyl-1-O-methylquinic acid                                            | C17H20O9    | 367.104789  | No  |
| 6479 | HMDB0039960                      | 3-O-Caffeoyl-4-O-methylquinic acid                                            | C17H20O9    | 367.104789  | No  |
| 6479 | HMDB0126418                      | 3,4,5-trihydroxy-6-[[5-hydroxy-2,2-dimethyl-2H-chrom C17H20O9                 |             | 367.104789  | No  |
| 6479 | HMDB0126419                      | 3,4,5-trihydroxy-6-[[7-hydroxy-2,2-dimethyl-2H-chrom C17H20O9                 |             | 367.104789  | No  |
| 6479 | HMDB0126420                      | 3,4,5-trihydroxy-6-[[5-hydroxy-2,2-dimethyl-2H-chrom C17H20O9                 |             | 367.104789  | No  |
| 6479 | HMDB0126421                      | 3,4,5-trihydroxy-6-[[6-hydroxy-2,2-dimethyl-2H-chrom C17H20O9                 |             | 367.104789  | No  |
| 6479 | HMDB0126422                      | 6-[[5,5-dimethyl-3,6-dioxatricyclo[5.4.0.0 <sup>2</sup> ,?]undeca-1( C17H20O9 |             | 367.104789  | No  |
| 6479 | HMDB0126423                      | 3,4,5-trihydroxy-6-[[2-(hydroxymethyl)-2-methyl-2H-cl C17H20O9                |             | 367.104789  | No  |
| 6479 | HMDB0127742                      | 3,4,5-trihydroxy-6-[3-[[5-oxoxolan-2-yl)methyl]pheno C17H20O9                 |             | 367.104789  | No  |
| 6479 | HMDB0129399                      | 3,4,5-trihydroxy-6-[1-(4-methoxy-1-benzofuran-5-yl)et C17H20O9                |             | 367.104789  | No  |
| 6479 | HMDB0135673                      | 3,4,5-trihydroxy-6-[2-methoxy-4-(3-oxobut-1-en-1-yl)p C17H20O9                |             | 367.104789  | No  |
| 6481 | HMDB0013919                      | N-Desmethyleletriptan                                                         | C21H24N2O2S | 367.1477591 | No  |
| 6482 | HMDB0038815                      | 2'',4-Dihydroxy-4'',6''-dimethoxy-3''-prenylchalcone                          | C22H24O5    | 367.1543591 | No  |
| 6482 | HMDB0039057                      | 9-Hydroxy-4-(3,7-dimethyl-2,6-octadienyloxy)-psoraler C22H24O5                |             | 367.1543591 | No  |
| 6482 | HMDB0041193                      | Kanzonol P                                                                    | C22H24O5    | 367.1543591 | No  |
| 6482 | HMDB0125890                      | 1-(4-hydroxy-3-methoxyphenyl)-3-(5-methoxy-2,2-dim C22H24O5                   |             | 367.1543591 | No  |
| 6483 | HMDB0001032; C04555; CHEBI:16814 | Dehydroepiandrosterone sulfate                                                | C19H28O5S   | 367.1598246 | No  |
| 6483 | HMDB0002833; CHEBI:84094         | Testosterone sulfate                                                          | C19H28O5S   | 367.1598246 | No  |
| 6483 | HMDB0013230                      | Epitestosterone sulfate                                                       | C19H28O5S   | 367.1598246 | No  |
| 6483 | HMDB0041255                      | (2S)-2-Butanol O-[b-D-Apiofuranosyl-(1->6)-b-D-glucop C15H28O10               |             | 367.1598246 | No  |
| 6485 | HMDB0001908                      | 19-Hydroxy-PGE2                                                               | C20H32O6    | 367.2131844 | Yes |
| 6485 | HMDB0001979; CHEBI:72595         | 6,15-Diketo,13,14-dihydro-PGF1a                                               | C20H32O6    | 367.2131844 | Yes |
| 6485 | HMDB0003235; C05956; CHEBI:27647 | Prostaglandin G2                                                              | C20H32O6    | 367.2131844 | Yes |
| 6485 | HMDB0003247; CHEBI:137370        | 20-Hydroxy-PGE2                                                               | C20H32O6    | 367.2131844 | Yes |
| 6485 | HMDB0004241; C05962; CHEBI:28269 | 6-Ketoprostaglandin E1                                                        | C20H32O6    | 367.2131844 | Yes |
| 6485 | HMDB0004242; C05964; CHEBI:28667 | 11-Dehydro-thromboxane B2                                                     | C20H32O6    | 367.2131844 | Yes |
| 6485 | HMDB0005099                      | Thromboxane B3                                                                | C20H32O6    | 367.2131844 | Yes |
| 6485 | HMDB0012110; C04741              | 5(6)-Epoxy Prostaglandin E1                                                   | C20H32O6    | 367.2131844 | Yes |
| 6485 | HMDB0012633                      | 20-COOH-10,11-dihydro-LTB4                                                    | C20H32O6    | 367.2131844 | Yes |
| 6485 | HMDB0012635                      | 20-dihydroxyleukotriene B4                                                    | C20H32O6    | 367.2131844 | Yes |
| 6485 | HMDB0034678                      | Cinnassiol D2                                                                 | C20H32O6    | 367.2131844 | Yes |

|      |                                  |                                                         |             |             |     |
|------|----------------------------------|---------------------------------------------------------|-------------|-------------|-----|
| 6485 | HMDB0036854                      | Cinnacsiol D3                                           | C20H32O6    | 367.2131844 | Yes |
| 6485 | HMDB0062748; CHEBI:90976         | 20-hydroxyliopoxin A4                                   | C20H32O6    | 367.2131844 | Yes |
| 6489 | HMDB0003180; C05482; CHEBI:3898  | Cortol                                                  | C21H36O5    | 367.2468293 | No  |
| 6489 | HMDB0005821                      | Beta-Cortol                                             | C21H36O5    | 367.2468293 | No  |
| 6489 | HMDB0037961                      | gamma-Eudesmol rhamnoside                               | C21H36O5    | 367.2468293 | No  |
| 6491 | HMDB0036013                      | (R)-3,4-Dihydro-2-(4,8,12-trimethyl-3,7,11-tridecatrien | C25H36O2    | 367.2640165 | No  |
| 6491 | HMDB0036054                      | 12"-Apo-b-carotene-3,12"-diol                           | C25H36O2    | 367.2640165 | No  |
| 6491 | HMDB0039761                      | 1,1'-[1,13-Tridecanediylbis(oxy)]bisbenzene             | C25H36O2    | 367.2640165 | No  |
| 6492 | HMDB0038073                      | Octadecyl fumarate                                      | C22H40O4    | 367.2859783 | No  |
| 6493 | HMDB0002003; C08320; CHEBI:28866 | Tetracosanoic acid                                      | C24H48O2    | 367.3581025 | No  |
| 6493 | HMDB0035633                      | 5-Hydroxy-7-tetracosanone                               | C24H48O2    | 367.3581025 | No  |
| 6493 | HMDB0035636                      | 4-Hydroxy-6-tetracosanone                               | C24H48O2    | 367.3581025 | No  |
| 6493 | HMDB0040887                      | 20-Tetracosene-1,18-diol                                | C24H48O2    | 367.3581025 | No  |
| 6512 | HMDB0015633; CHEBI:64045         | Amisulpride                                             | C17H27N3O4S | 368.162872  | Yes |
| 6514 | HMDB0015092; CHEBI:50815         | Norgestimate                                            | C23H31NO3   | 368.2224113 | Yes |
| 6545 | HMDB0127729                      | [2-hydroxy-5-(3,5,7-trihydroxy-3,4-dihydro-2H-1-benz    | C15H14O9S   | 369.0296929 | Yes |
| 6545 | HMDB0130010                      | {4-[1-oxo-1-(2,3,4,6-tetrahydroxyphenyl)propan-2-yl]p   | C15H14O9S   | 369.0296929 | Yes |
| 6545 | HMDB0130254                      | {4-[3-oxo-3-(2,3,4,6-tetrahydroxyphenyl)propyl]phenyl   | C15H14O9S   | 369.0296929 | Yes |
| 6545 | HMDB0133576                      | {4-[(2,3,4,6-tetrahydroxy-2,3-dihydro-1-benzofuran-2-yl | C15H14O9S   | 369.0296929 | Yes |
| 6545 | HMDB0133577                      | {2,4,6-trihydroxy-2-[(4-hydroxyphenyl)methyl]-2,3-dih   | C15H14O9S   | 369.0296929 | Yes |
| 6545 | HMDB0134831                      | {4-[(1E)-3-hydroxy-3-(2,3,4,6-tetrahydroxyphenyl)prop   | C15H14O9S   | 369.0296929 | Yes |
| 6545 | HMDB0134832                      | {[(2E)-3-(4-hydroxyphenyl)-1-(2,3,4,6-tetrahydroxyphe   | C15H14O9S   | 369.0296929 | Yes |
| 6545 | HMDB0135523                      | [4-(3,4,5,7-tetrahydroxy-3,4-dihydro-2H-1-benzopyran    | C15H14O9S   | 369.0296929 | Yes |
| 6545 | HMDB0135524                      | [3,5,7-trihydroxy-2-(4-hydroxyphenyl)-3,4-dihydro-2H-   | C15H14O9S   | 369.0296929 | Yes |
| 6545 | HMDB0135525                      | [4,5,7-trihydroxy-2-(4-hydroxyphenyl)-3,4-dihydro-2H-   | C15H14O9S   | 369.0296929 | Yes |
| 6546 | HMDB0037371                      | Suillusin                                               | C19H14O8    | 369.062993  | Yes |
| 6546 | HMDB0127782                      | {[1-(3-methoxyphenyl)-3-(2,4,6-trihydroxyphenyl)prop    | C16H18O8S   | 369.062993  | Yes |
| 6546 | HMDB0128900                      | 15,17-dihydroxy-11,18-dimethoxy-6,8,20-trioxapentac     | C19H14O8    | 369.062993  | Yes |
| 6546 | HMDB0128901                      | 15,18-dihydroxy-11,17-dimethoxy-6,8,20-trioxapentac     | C19H14O8    | 369.062993  | Yes |
| 6546 | HMDB0128902                      | 11,15-dihydroxy-17,18-dimethoxy-6,8,20-trioxapentac     | C19H14O8    | 369.062993  | Yes |
| 6547 | HMDB0039774                      | 5-Hydroxy-6-methoxycoumarin 7-glucoside                 | C16H18O10   | 369.0832614 | No  |
| 6547 | HMDB0041733                      | Ferulic acid 4-O-glucuronide                            | C16H18O10   | 369.0832614 | No  |
| 6547 | HMDB0041734                      | Feruloyl C1-glucuronide                                 | C16H18O10   | 369.0832614 | No  |
| 6547 | HMDB0041747                      | Isoferulic acid 3-O-glucuronide                         | C16H18O10   | 369.0832614 | No  |
| 6547 | HMDB0041749                      | Isoferuloyl C1-glucuronide                              | C16H18O10   | 369.0832614 | No  |
| 6547 | HMDB0127515                      | 3,4,5-trihydroxy-6-[[3-(4-methoxyphenyl)-2-oxopropar    | C16H18O10   | 369.0832614 | No  |
| 6547 | HMDB0127953                      | 6-[4-(2-carboxyeth-1-en-1-yl)-2-methoxyphenoxy]-3,4,    | C16H18O10   | 369.0832614 | No  |
| 6547 | HMDB0127954                      | 3,4,5-trihydroxy-6-[[3-(4-hydroxy-3-methoxyphenyl)pr    | C16H18O10   | 369.0832614 | No  |
| 6547 | HMDB0127997                      | 6-[3-(2-carboxyeth-1-en-1-yl)-5-methoxyphenoxy]-3,4,    | C16H18O10   | 369.0832614 | No  |
| 6547 | HMDB0127998                      | 3,4,5-trihydroxy-6-[[3-(3-hydroxy-5-methoxyphenyl)pr    | C16H18O10   | 369.0832614 | No  |
| 6547 | HMDB0133307                      | 6-{4-[(1E)-2-carboxyeth-1-en-1-yl]-2-methoxyphenoxy}    | C16H18O10   | 369.0832614 | No  |
| 6547 | HMDB0133308                      | 3,4,5-trihydroxy-6-[[{(2E)-3-(4-hydroxy-3-methoxyphen   | C16H18O10   | 369.0832614 | No  |
| 6547 | HMDB0135747                      | 6-[2-(2-carboxyeth-1-en-1-yl)-5-methoxyphenoxy]-3,4,    | C16H18O10   | 369.0832614 | No  |
| 6547 | HMDB0135748                      | 3,4,5-trihydroxy-6-[[3-(2-hydroxy-4-methoxyphenyl)pr    | C16H18O10   | 369.0832614 | No  |
| 6548 | HMDB0040865                      | Linusitamarin                                           | C17H22O9    | 369.1190431 | Yes |
| 6548 | HMDB0041115                      | Perilloside E                                           | C17H22O9    | 369.1190431 | Yes |
| 6548 | HMDB0059980; CHEBI:88704         | 4-Hydroxy-5-(phenyl)-valeric acid-O-glucuronide         | C17H22O9    | 369.1190431 | Yes |
| 6548 | HMDB0126241                      | 3,4,5-trihydroxy-6-[3-hydroxy-2-(4-hydroxy-3-methylb    | C17H22O9    | 369.1190431 | Yes |
| 6548 | HMDB0126243                      | 6-[2,4-dihydroxy-3-(3-methylbut-2-en-1-yl)phenoxy]-3,   | C17H22O9    | 369.1190431 | Yes |
| 6548 | HMDB0126244                      | 6-[3,6-dihydroxy-2-(3-methylbut-2-en-1-yl)phenoxy]-3,   | C17H22O9    | 369.1190431 | Yes |
| 6548 | HMDB0126245                      | 6-[3,4-dihydroxy-2-(3-methylbut-2-en-1-yl)phenoxy]-3,   | C17H22O9    | 369.1190431 | Yes |
| 6548 | HMDB0126247                      | 6-{2-[[3,3-dimethyloxiran-2-yl)methyl]-3-hydroxyphenyl} | C17H22O9    | 369.1190431 | Yes |
| 6548 | HMDB0126372                      | 3,4,5-trihydroxy-6-[3-hydroxy-2-[(2E)-4-hydroxy-3-met   | C17H22O9    | 369.1190431 | Yes |
| 6548 | HMDB0133251                      | 3,4,5-trihydroxy-6-[5-hydroxy-2-(4-hydroxy-3-methylb    | C17H22O9    | 369.1190431 | Yes |
| 6548 | HMDB0133252                      | 3,4,5-trihydroxy-6-[3-hydroxy-4-[(2E)-4-hydroxy-3-met   | C17H22O9    | 369.1190431 | Yes |
| 6548 | HMDB0133254                      | 3,4,5-trihydroxy-6-[3-hydroxy-4-(4-hydroxy-3-methylb    | C17H22O9    | 369.1190431 | Yes |
| 6548 | HMDB0133256                      | 6-[2,6-dihydroxy-3-(3-methylbut-2-en-1-yl)phenoxy]-3,   | C17H22O9    | 369.1190431 | Yes |
| 6548 | HMDB0133257                      | 6-[2,3-dihydroxy-6-(3-methylbut-2-en-1-yl)phenoxy]-3,   | C17H22O9    | 369.1190431 | Yes |
| 6548 | HMDB0133258                      | 6-[2,3-dihydroxy-4-(3-methylbut-2-en-1-yl)phenoxy]-3,   | C17H22O9    | 369.1190431 | Yes |
| 6548 | HMDB0133260                      | 6-[2,4-dihydroxy-5-(3-methylbut-2-en-1-yl)phenoxy]-3,   | C17H22O9    | 369.1190431 | Yes |
| 6548 | HMDB0133261                      | 6-[4,5-dihydroxy-2-(3-methylbut-2-en-1-yl)phenoxy]-3,   | C17H22O9    | 369.1190431 | Yes |

|      |                                  |                                                                                                   |             |     |
|------|----------------------------------|---------------------------------------------------------------------------------------------------|-------------|-----|
| 6548 | HMDB0133264                      | 6-{2-[(3,3-dimethyloxiran-2-yl)methyl]-5-hydroxyphenyl}-3-hydroxyphenyl C17H22O9                  | 369.1190431 | Yes |
| 6548 | HMDB0133265                      | 6-{4-[(3,3-dimethyloxiran-2-yl)methyl]-3-hydroxyphenyl}-3-hydroxyphenyl C17H22O9                  | 369.1190431 | Yes |
| 6548 | HMDB0135675                      | 3,4,5-trihydroxy-6-[2-methoxy-4-(3-oxobutyl)phenoxy] C17H22O9                                     | 369.1190431 | Yes |
| 6548 | HMDB0135697                      | 3,4,5-trihydroxy-6-[4-(3-hydroxybut-1-en-1-yl)-2-methoxyphenyl] C17H22O9                          | 369.1190431 | Yes |
| 6549 | HMDB0133009                      | 3,4,5-trihydroxy-6-[[1-(4-methoxyphenyl)pentan-3-yl]oxy] C18H26O8                                 | 369.1557729 | Yes |
| 6551 | HMDB0002759; CHEBI:83037         | Androsterone sulfate C19H30O5S                                                                    | 369.1742832 | No  |
| 6551 | HMDB0006278; CHEBI:138026        | 5a-Dihydrotestosterone sulfate C19H30O5S                                                          | 369.1742832 | No  |
| 6551 | HMDB0013232                      | Etiocanolone sulfate C19H30O5S                                                                    | 369.1742832 | No  |
| 6551 | HMDB0062657; CHEBI:83040         | Epiandrosterone Sulfate C19H30O5S                                                                 | 369.1742832 | No  |
| 6553 | HMDB0032841                      | 5-Megastigmen-7-yn-3,9-diol 9-glucoside C19H30O7                                                  | 369.1922831 | No  |
| 6553 | HMDB0032842                      | 5-Megastigmen-7-yn-3,9-diol 3-glucoside C19H30O7                                                  | 369.1922831 | No  |
| 6553 | HMDB0036822                      | (3S,7E,9S)-9-Hydroxy-4,7-megastigmadien-3-one 9-glucoside C19H30O7                                | 369.1922831 | No  |
| 6555 | HMDB0094680; CHEBI:44794         | Octaethylene glycol C16H34O9                                                                      | 369.2132866 | Yes |
| 6556 | HMDB0002886; C05961; CHEBI:28158 | 6-Keto-prostaglandin F1a C20H34O6                                                                 | 369.2288536 | Yes |
| 6556 | HMDB0003252; C05963; CHEBI:28728 | Thromboxane B2 C20H34O6                                                                           | 369.2288536 | Yes |
| 6556 | HMDB0004049                      | 20-Hydroxy-PGF2a C20H34O6                                                                         | 369.2288536 | Yes |
| 6556 | HMDB0012502                      | 10,11-dihydro-20-dihydroxy-LTB4 C20H34O6                                                          | 369.2288536 | Yes |
| 6556 | HMDB0013039                      | Prostaglandin G1 C20H34O6                                                                         | 369.2288536 | Yes |
| 6558 | HMDB0040270; C14240; CHEBI:34675 | Diethylhexyl adipate C22H42O4                                                                     | 369.3012052 | No  |
| 6558 | HMDB0041619                      | Diethyl hexanedioate C22H42O4                                                                     | 369.3012052 | No  |
| 6571 | HMDB0240252; CHEBI:133026        | Salicylic acid beta-D-glucuronide C15H17NO10                                                      | 370.0771538 | No  |
| 6574 | HMDB0014813; C07108; CHEBI:41774 | Tamoxifen C26H29NO                                                                                | 370.2168378 | No  |
| 6589 | HMDB0031592                      | Brevifolinic acid 9-sulfate C13H8O11S                                                             | 370.9698768 | No  |
| 6595 | HMDB0031756                      | Veranisatin C C16H20O10                                                                           | 371.0985254 | No  |
| 6595 | HMDB0041723                      | Dihydroferulic acid 4-O-glucuronide C16H20O10                                                     | 371.0985254 | No  |
| 6595 | HMDB0127981                      | 6-[4-(2-carboxyethyl)-2-methoxyphenoxy]-3,4,5-trihydroxyphenyl C16H20O10                          | 371.0985254 | No  |
| 6595 | HMDB0127982                      | 3,4,5-trihydroxy-6-[[3-(4-hydroxy-3-methoxyphenyl)propyl]oxy] C16H20O10                           | 371.0985254 | No  |
| 6595 | HMDB0128015                      | 6-[3-(2-carboxyethyl)-5-methoxyphenoxy]-3,4,5-trihydroxyphenyl C16H20O10                          | 371.0985254 | No  |
| 6595 | HMDB0128016                      | 3,4,5-trihydroxy-6-[[3-(3-hydroxy-5-methoxyphenyl)propyl]oxy] C16H20O10                           | 371.0985254 | No  |
| 6595 | HMDB0133870                      | 6-[2-(1-carboxyethyl)-5-methoxyphenoxy]-3,4,5-trihydroxyphenyl C16H20O10                          | 371.0985254 | No  |
| 6595 | HMDB0133871                      | 3,4,5-trihydroxy-6-[[2-(2-hydroxy-4-methoxyphenyl)propyl]oxy] C16H20O10                           | 371.0985254 | No  |
| 6599 | HMDB0039234                      | Citrusin E C17H24O9                                                                               | 371.1354072 | Yes |
| 6599 | HMDB0135716                      | 3,4,5-trihydroxy-6-[4-(3-hydroxybutyl)-2-methoxyphenyl] C17H24O9                                  | 371.1354072 | Yes |
| 6604 | HMDB0040668                      | Blumenol C glucoside C19H32O7                                                                     | 371.2076173 | Yes |
| 6604 | HMDB0040701                      | 9-Hydroxy-7-megastigmen-3-one glucoside C19H32O7                                                  | 371.2076173 | Yes |
| 6606 | HMDB0014550; CHEBI:604234        | Gentian Violet C25H30N3                                                                           | 371.2357174 | No  |
| 6652 | HMDB0029538; CHEBI:506254        | Neodiospyrin C22H14O6                                                                             | 373.072791  | Yes |
| 6652 | HMDB0129030                      | {4-[(E)-2-{3,5-dihydroxy-4-[(1E)-3-methylbuta-1,3-dienyl]oxy}phenyl]oxy} C19H18O6S                | 373.072791  | Yes |
| 6653 | HMDB0034942; C11673              | Geniposidic acid C16H22O10                                                                        | 373.1144482 | Yes |
| 6655 | HMDB0030164                      | Cyclonormammin C21H26O6                                                                           | 373.1646974 | No  |
| 6655 | HMDB0030649                      | Mammea B/BC cyclo E C21H26O6                                                                      | 373.1646974 | No  |
| 6655 | HMDB0030650; CHEBI:554198        | 8,9-Dihydro-5-hydroxy-8-(1-hydroxy-1-methylethyl)-6-methyl-2H-pyran C21H26O6                      | 373.1646974 | No  |
| 6655 | HMDB0033534                      | Fragransin C1 C21H26O6                                                                            | 373.1646974 | No  |
| 6655 | HMDB0033537                      | Fragransol A C21H26O6                                                                             | 373.1646974 | No  |
| 6655 | HMDB0036463                      | 1-(4-Hydroxy-3,5-dimethoxyphenyl)-2-[2-methoxy-4-(1-methoxy-2-methyl-2-propenyl)phenoxy] C21H26O6 | 373.1646974 | No  |
| 6655 | HMDB0039248                      | 2-(4-Allyl-2,6-dimethoxyphenoxy)-1-(4-hydroxy-3-methoxyphenyl) C21H26O6                           | 373.1646974 | No  |
| 6655 | HMDB0041139                      | Sonchifolin C21H26O6                                                                              | 373.1646974 | No  |
| 6657 | HMDB0029782                      | 6-Epi-7-isocucurbitic acid glucoside C18H30O8                                                     | 373.1873669 | Yes |
| 6659 | HMDB0040824                      | Tsangane L 3-glucoside C19H34O7                                                                   | 373.2233398 | No  |
| 6661 | HMDB0061030                      | omega-hydroxyfinasteride C22H34N2O3                                                               | 373.2506114 | No  |
| 6663 | HMDB0000308; CHEBI:384794        | 3b-Hydroxy-5-cholenoic acid C24H38O3                                                              | 373.2748574 | No  |
| 6663 | HMDB0038522                      | 2-(10-Heptadecenyl)-6-hydroxybenzoic acid C24H38O3                                                | 373.2748574 | No  |
| 6663 | HMDB0041453                      | D8"-Merulinic acid C C24H38O3                                                                     | 373.2748574 | No  |
| 6692 | HMDB0033300                      | (1R,2R)-Guaiacylglycerol 1-glucoside C16H24O10                                                    | 375.1281801 | Yes |
| 6692 | HMDB0033301                      | (1x,2x)-Guaiacylglycerol 2-glucoside C16H24O10                                                    | 375.1281801 | Yes |
| 6692 | HMDB0040600                      | (1x,2x)-Guaiacylglycerol 3-glucoside C16H24O10                                                    | 375.1281801 | Yes |
| 6693 | HMDB0038971                      | Diacetyl fufarochromanone C19H24N2O6                                                              | 375.1548151 | Yes |
| 6695 | HMDB0000332                      | 18-Oxocortisol C21H28O6                                                                           | 375.1811852 | Yes |
| 6695 | HMDB0031932                      | 11,12,14-Trihydroxy-7-methoxy-8,11,13-abietatrien-2-ol C21H28O6                                   | 375.1811852 | Yes |
| 6695 | HMDB0039557                      | 12alpha-Hydroxy-13,18-dehydroparain C21H28O6                                                      | 375.1811852 | Yes |
| 6695 | HMDB0061016                      | 16alpha;-hydroxyprednisolone C21H28O6                                                             | 375.1811852 | Yes |

|      |                                    |                                                        |              |             |     |
|------|------------------------------------|--------------------------------------------------------|--------------|-------------|-----|
| 6696 | HMDB0014722; C06977; CHEBI:4784    | Enalapril                                              | C20H28N2O5   | 375.1925455 | No  |
| 6696 | HMDB0015036; C08021; CHEBI:8802    | Remifentanyl                                           | C20H28N2O5   | 375.1925455 | No  |
| 6701 | HMDB0000381                        | Allolithocholic acid                                   | C24H40O3     | 375.290574  | No  |
| 6701 | HMDB0000713                        | Isoalloithocholic acid                                 | C24H40O3     | 375.290574  | No  |
| 6701 | HMDB0000717; C17658                | Isolithocholic acid                                    | C24H40O3     | 375.290574  | No  |
| 6701 | HMDB0000761; C03990; CHEBI:16325   | Lithocholic acid                                       | C24H40O3     | 375.290574  | No  |
| 6701 | HMDB0002431                        | 12b-Hydroxy-5b-cholanoic acid                          | C24H40O3     | 375.290574  | No  |
| 6701 | HMDB0002492; CHEBI:542339          | 7a-Hydroxy-5b-cholanic acid                            | C24H40O3     | 375.290574  | No  |
| 6746 | HMDB0129424                        | 3,4,5-trihydroxy-6-({7-oxo-7H-furo[3,2-g]chromen-4-yl  | C17H14O10    | 377.0511988 | No  |
| 6749 | HMDB0029304; CHEBI:89421           | 3,4-DHPEA-EA                                           | C19H22O8     | 377.1248589 | No  |
| 6749 | HMDB0035037                        | Gibberellin A32                                        | C19H22O8     | 377.1248589 | No  |
| 6749 | HMDB0039137                        | 2-(3,4-Dihydroxyphenylethyl)-6-epi-elenaite            | C19H22O8     | 377.1248589 | No  |
| 6750 | HMDB0011739                        | Galactinol dihydrate                                   | C12H26O13    | 377.132559  | No  |
| 6751 | HMDB0030656; CHEBI:657230          | Demethylcalabaxanthone                                 | C23H22O5     | 377.136959  | No  |
| 6751 | HMDB0040350                        | 6,11-Dihydroxy-3-methyl-3-(4-methyl-3-pentenyl)-3H,    | C23H22O5     | 377.136959  | No  |
| 6753 | HMDB0030657                        | Carinol                                                | C20H26O7     | 377.160949  | Yes |
| 6753 | HMDB0034474; C09517                | Niveusin C                                             | C20H26O7     | 377.160949  | Yes |
| 6753 | HMDB0035053                        | Gibberellin A52                                        | C20H26O7     | 377.160949  | Yes |
| 6753 | HMDB0036694                        | 15-Hydroxyleptocarpin                                  | C20H26O7     | 377.160949  | Yes |
| 6753 | HMDB0036897; CHEBI:24236           | Gibberellin A17                                        | C20H26O7     | 377.160949  | Yes |
| 6753 | HMDB0036900                        | Gibberellin A66                                        | C20H26O7     | 377.160949  | Yes |
| 6753 | HMDB0036945                        | Gibberellin A125                                       | C20H26O7     | 377.160949  | Yes |
| 6753 | HMDB0041002                        | (1E,4Z,6a,8b,10a)-8-(2-Methylbutanoyloxy)-10,15-dihy   | C20H26O7     | 377.160949  | Yes |
| 6753 | HMDB0041231                        | Gibberellin A99                                        | C20H26O7     | 377.160949  | Yes |
| 6753 | HMDB0041349                        | Gibberellin A102                                       | C20H26O7     | 377.160949  | Yes |
| 6757 | HMDB0000418                        | 18-Hydroxycortisol                                     | C21H30O6     | 377.1971195 | Yes |
| 6757 | HMDB0030045                        | Isohumulinone A                                        | C21H30O6     | 377.1971195 | Yes |
| 6757 | HMDB0030105                        | Humulinone                                             | C21H30O6     | 377.1971195 | Yes |
| 6757 | HMDB0032770                        | Eremopetasinenin C1                                    | C21H30O6     | 377.1971195 | Yes |
| 6757 | HMDB0032773                        | Eremopetasinenin D1                                    | C21H30O6     | 377.1971195 | Yes |
| 6757 | HMDB0036889                        | 11-Dihydro-12-norneoquassin                            | C21H30O6     | 377.1971195 | Yes |
| 6757 | HMDB0040702                        | Sugetriol triacetate                                   | C21H30O6     | 377.1971195 | Yes |
| 6757 | HMDB0061033                        | 6-beta-hydrocortisol                                   | C21H30O6     | 377.1971195 | Yes |
| 6759 | HMDB0035508                        | Annoglabasin F                                         | C22H34O5     | 377.2334691 | No  |
| 6777 | HMDB0060415; C16619; CHEBI:1267082 | 6-Thioguanosine monophosphate                          | C10H14N5O7PS | 378.0265507 | No  |
| 6777 | HMDB0060789                        | 6-Thioguanilic acid                                    | C10H14N5O7PS | 378.0265507 | No  |
| 6779 | HMDB0033513                        | Gonyautoxin V                                          | C10H17N7O7S  | 378.0815508 | Yes |
| 6783 | HMDB0039505                        | 2-(Arabinosylamino)-3-(glucosylamino)propanenitrile    | C14H25N3O9   | 378.1494309 | Yes |
| 6788 | HMDB0032529                        | Thaumatococin b, recombinant                           | C19H29N3O3S  | 378.185731  | No  |
| 6814 | HMDB0036893                        | Gibberellin A75                                        | C19H24O8     | 379.1403938 | No  |
| 6814 | HMDB0037056                        | 8-Oxodiacetoxyscirpenol                                | C19H24O8     | 379.1403938 | No  |
| 6814 | HMDB0038328                        | (S)-Bitalin A 12-glucoside                             | C19H24O8     | 379.1403938 | No  |
| 6814 | HMDB0038450                        | Gibberellin A86                                        | C19H24O8     | 379.1403938 | No  |
| 6814 | HMDB0040899                        | Methyl helianthenoate A glucoside                      | C19H24O8     | 379.1403938 | No  |
| 6815 | HMDB0031954                        | 3-Methyl-3-butenyl apiosyl-(1->6)-glucoside            | C16H28O10    | 379.1614598 | Yes |
| 6815 | HMDB0031956                        | Prenyl apiosyl-(1->6)-glucoside                        | C16H28O10    | 379.1614598 | Yes |
| 6815 | HMDB0041360                        | Prenyl arabinosyl-(1->6)-glucoside                     | C16H28O10    | 379.1614598 | Yes |
| 6816 | HMDB0030760                        | Pteroside B                                            | C20H28O7     | 379.1763729 | No  |
| 6816 | HMDB0035166                        | Cinnassiol C                                           | C20H28O7     | 379.1763729 | No  |
| 6816 | HMDB0035840                        | Deacetylisovaltrate                                    | C20H28O7     | 379.1763729 | No  |
| 6816 | HMDB0041228                        | 6b-Angeloyl-3b,8b,9b-trihydroxy-7(11)-eremophilen-1'   | C20H28O7     | 379.1763729 | No  |
| 6816 | HMDB0126521                        | 3,4,5-trihydroxy-6-(((2Z)-2-(phenylmethylidene)heptyl] | C20H28O7     | 379.1763729 | No  |
| 6817 | HMDB0030760                        | Pteroside B                                            | C20H28O7     | 379.1783907 | Yes |
| 6817 | HMDB0035166                        | Cinnassiol C                                           | C20H28O7     | 379.1783907 | Yes |
| 6817 | HMDB0035840                        | Deacetylisovaltrate                                    | C20H28O7     | 379.1783907 | Yes |
| 6817 | HMDB0041228                        | 6b-Angeloyl-3b,8b,9b-trihydroxy-7(11)-eremophilen-1'   | C20H28O7     | 379.1783907 | Yes |
| 6817 | HMDB0126521                        | 3,4,5-trihydroxy-6-(((2Z)-2-(phenylmethylidene)heptyl] | C20H28O7     | 379.1783907 | Yes |
| 6820 | HMDB0040568                        | [6]-Gingerdiol 3,5-diacetate                           | C21H32O6     | 379.2125663 | Yes |
| 6823 | HMDB0002082                        | Bisnorcholic acid                                      | C22H36O5     | 379.250223  | No  |
| 6836 | HMDB0037269                        | Desacetylcefapirin                                     | C15H15N3O5S2 | 380.0377145 | No  |
| 6855 | HMDB0128640                        | 7-[(6-carboxy-3,4,5-trihydroxyoxan-2-yl)oxy]-1-oxo-1H  | C16H14O11    | 381.0488364 | Yes |

|      |                                   |                                                                 |             |     |
|------|-----------------------------------|-----------------------------------------------------------------|-------------|-----|
| 6855 | HMDB0128641                       | 3,4,5-trihydroxy-6-(7-hydroxy-1-oxo-1H-isochromene-: C16H14O11  | 381.0488364 | Yes |
| 6855 | HMDB0128643                       | 6-[(6-carboxy-3,4,5-trihydroxyoxan-2-yl)oxy]-1-oxo-1H C16H14O11 | 381.0488364 | Yes |
| 6855 | HMDB0128644                       | 3,4,5-trihydroxy-6-(6-hydroxy-1-oxo-1H-isochromene-: C16H14O11  | 381.0488364 | Yes |
| 6855 | HMDB0128646                       | 5-[(6-carboxy-3,4,5-trihydroxyoxan-2-yl)oxy]-1-oxo-1H C16H14O11 | 381.0488364 | Yes |
| 6855 | HMDB0128647                       | 3,4,5-trihydroxy-6-(5-hydroxy-1-oxo-1H-isochromene-: C16H14O11  | 381.0488364 | Yes |
| 6857 | HMDB0000961; C00448; CHEBI:17407  | Farnesyl pyrophosphate C15H28O7P2                               | 381.1221366 | Yes |
| 6858 | HMDB0010343; C03033               | 1-(alpha-Methyl-4-(2-methylpropyl)benzeneacetate)-b C19H26O8    | 381.1561546 | No  |
| 6858 | HMDB0035201                       | 4,8-Diacetyl-T2-tetrol C19H26O8                                 | 381.1561546 | No  |
| 6858 | HMDB0038916                       | 7alpha,8alpha-Dihydroxycalonectrin C19H26O8                     | 381.1561546 | No  |
| 6858 | HMDB0039811                       | Cyclocalopin B C19H26O8                                         | 381.1561546 | No  |
| 6858 | HMDB0060919                       | Ibuprofen glucuronide C19H26O8                                  | 381.1561546 | No  |
| 6858 | HMDB0132958                       | 3,4,5-trihydroxy-6-[[1-(4-methoxyphenyl)-4-methylper C19H26O8   | 381.1561546 | No  |
| 6858 | HMDB0140970                       | 3,4,5-trihydroxy-6-([2-[4-(2-methylpropyl)phenyl]prop. C19H26O8 | 381.1561546 | No  |
| 6859 | HMDB0012553                       | 12-Oxo-20-trihydroxy-leukotriene B4 C20H30O7                    | 381.1926179 | No  |
| 6859 | HMDB0035164                       | Cinnassiol A C20H30O7                                           | 381.1926179 | No  |
| 6859 | HMDB0035396                       | T2 Triol C20H30O7                                               | 381.1926179 | No  |
| 6859 | HMDB0036859                       | Cinnassiol C3 C20H30O7                                          | 381.1926179 | No  |
| 6862 | HMDB0034953                       | Apo-12''-violaxanthal C25H34O3                                  | 381.2460672 | No  |
| 6867 | HMDB0002361; CHEBI:39420          | Pentacosanoic acid C25H50O2                                     | 381.3731891 | No  |
| 6867 | HMDB0035629                       | 6-Hydroxy-8-pentacosanone C25H50O2                              | 381.3731891 | No  |
| 6867 | HMDB0035630                       | 4-Hydroxy-6-pentacosanone C25H50O2                              | 381.3731891 | No  |
| 6867 | HMDB0035632                       | 6-Hydroxy-4-pentacosanone C25H50O2                              | 381.3731891 | No  |
| 6867 | HMDB0036843                       | Lepidiumsesterterpenol C25H50O2                                 | 381.3731891 | No  |
| 6876 | HMDB0015427; C06890; CHEBI:553473 | Ceftizoxime C13H13N5O5S2                                        | 382.0301483 | Yes |
| 6877 | HMDB0015325; C07760; CHEBI:3176   | Brinzolamide C12H21N3O5S3                                       | 382.0581483 | Yes |
| 6879 | HMDB0000912; CHEBI:71169          | Succinyladenosine C14H17N5O8                                    | 382.0997484 | No  |
| 6881 | HMDB0001542; C00611; CHEBI:16153  | N-Acetyllactosamine C14H25NO11                                  | 382.1362485 | No  |
| 6881 | HMDB0006535                       | Beta-1,4-mannose-N-acetylglucosamine C14H25NO11                 | 382.1362485 | No  |
| 6881 | HMDB0006575; C06372; CHEBI:27707  | Lacto-N-biose I C14H25NO11                                      | 382.1362485 | No  |
| 6881 | HMDB0006583                       | Poly-N-acetyllactosamine C14H25NO11                             | 382.1362485 | No  |
| 6882 | HMDB0005021; C07397; CHEBI:8707   | Quetiapine C21H25N3O2S                                          | 382.1594149 | No  |
| 6897 | HMDB0000386                       | 3b,16a-Dihydroxyandrostene sulfate C19H28O6S                    | 383.1537804 | Yes |
| 6897 | HMDB0033063                       | 2,3-Butanediol apiosylglucoside C15H28O11                       | 383.1537804 | Yes |
| 6897 | HMDB0062611; CHEBI:87774          | 16alpha-hydroxydehydroepiandrosterone 3-sulfate C19H28O6S       | 383.1537804 | Yes |
| 6901 | HMDB0011543                       | MG(0:0/20:1(11Z)/0:0) C23H44O4                                  | 383.3168856 | No  |
| 6901 | HMDB0011573                       | MG(20:1(11Z)/0:0/0:0) C23H44O4                                  | 383.3168856 | No  |
| 6901 | HMDB0036344                       | Tetrahydropersin C23H44O4                                       | 383.3168856 | No  |
| 6902 | HMDB0039540; C17873; CHEBI:61302  | Cerebronic acid C24H48O3                                        | 383.3529976 | No  |
| 6912 | HMDB0014291; CHEBI:18303          | Phosphatidylserine C13H24NO10P                                  | 384.1088122 | Yes |
| 6928 | HMDB0012503                       | 10,11-dihydro-20-trihydroxy-leukotriene B4 C20H34O7             | 385.2237129 | Yes |
| 6943 | HMDB0001245; C00705; CHEBI:28846  | dCDP C9H15N3O10P2                                               | 386.0134057 | No  |
| 6946 | HMDB0031401                       | Dihydroxycitracridone I C20H21NO7                               | 386.124287  | No  |
| 6969 | HMDB0039964                       | beta-D-Glucopyranosyl-11-hydroxyjasmonic acid C18H28O9          | 387.1669432 | Yes |
| 6969 | HMDB0040706                       | 7-Epi-12-hydroxyjasmonic acid glucoside C18H28O9                | 387.1669432 | Yes |
| 6969 | HMDB0041552                       | 2-[4-(3-Hydroxypropyl)-2-methoxyphenoxy]-1,3-propa C18H28O9     | 387.1669432 | Yes |
| 6973 | HMDB0031676                       | 5a,6a-Epoxy-7E-megastigmen-3a,9e-diol 3-glucoside C19H32O8      | 387.2027208 | Yes |
| 6973 | HMDB0036318                       | 9,13-Dihydroxy-4-megastigmen-3-one 9-glucoside C19H32O8         | 387.2027208 | Yes |
| 6973 | HMDB0036846                       | Icariside B8 C19H32O8                                           | 387.2027208 | Yes |
| 6973 | HMDB0038306                       | 5a,6a-Epoxy-7E-megastigmen-3b,9e-diol 9-glucoside C19H32O8      | 387.2027208 | Yes |
| 6973 | HMDB0040614                       | Dihydoroseoside C19H32O8                                        | 387.2027208 | Yes |
| 6975 | HMDB0012109; C06475               | 5,6-Dihydroxyprostaglandin F1a C20H36O7                         | 387.2390476 | Yes |
| 6993 | HMDB0034071; C08425; CHEBI:8454   | Progoitrin C11H19NO10S2                                         | 388.0352494 | No  |
| 7000 | HMDB0030381                       | Roquefortine C22H23N5O2                                         | 388.1791497 | Yes |
| 7000 | HMDB0135477                       | 3-(3,4-dimethoxyphenyl)-N-[2-(3,4-dimethoxyphenyl)e C21H27NO6   | 388.1791497 | Yes |
| 7000 | HMDB0135478                       | 3-(3,4-dimethoxyphenyl)-N-[2-(3,4-dimethoxyphenyl)-: C21H27NO6  | 388.1791497 | Yes |
| 7000 | HMDB0135479                       | 3-(3,4-dimethoxyphenyl)-N-[2-(3,4-dimethoxyphenyl)e C21H27NO6   | 388.1791497 | Yes |
| 7023 | HMDB0034223                       | 2,3,4,5,6-Penta-O-acetyl-D-glucose C16H22O11                    | 389.1091495 | Yes |
| 7023 | HMDB0035608; C09788               | Monotropein C16H22O11                                           | 389.1091495 | Yes |
| 7025 | HMDB0029094                       | Tryptophyl-Tryptophan C22H22N4O3                                | 389.1644214 | Yes |
| 7030 | HMDB0041176                       | (3S,5R,6S,7E,9x)-7-Megastigmen-3,6,9-triol 9-glucosic C19H34O8  | 389.2184109 | Yes |
| 7030 | HMDB0041578                       | 7,8-Dihydro-3b,6a-dihydroxy-alpha-ionol 9-glucoside C19H34O8    | 389.2184109 | Yes |



|      |                                   |                                                                 |             |             |     |
|------|-----------------------------------|-----------------------------------------------------------------|-------------|-------------|-----|
| 7033 | HMDB0000328; CHEBI:803536         | 12-Ketodeoxycholic acid                                         | C24H38O4    | 389.2685023 | No  |
| 7033 | HMDB0000460                       | 7-Hydroxy-3-oxocholanoic acid                                   | C24H38O4    | 389.2685023 | No  |
| 7033 | HMDB0000467                       | Nutriacholic acid                                               | C24H38O4    | 389.2685023 | No  |
| 7033 | HMDB0000503                       | 7a-Hydroxy-3-oxo-5b-cholanoic acid                              | C24H38O4    | 389.2685023 | No  |
| 7033 | HMDB0012866                       | 9"-Carboxy-alpha-chromanol                                      | C24H38O4    | 389.2685023 | No  |
| 7033 | HMDB0041454                       | D8"-Merulinic acid A                                            | C24H38O4    | 389.2685023 | No  |
| 7033 | HMDB0062742; CHEBI:88104          | 12alpha-hydroxy-3-oxo-5beta-cholan-24-oic Acid                  | C24H38O4    | 389.2685023 | No  |
| 7088 | HMDB0038066                       | Garcimangosone D                                                | C19H20O9    | 391.1040063 | No  |
| 7088 | HMDB0130035                       | 3,4,5-trihydroxy-6-(((3E)-4-(1-oxo-1H-isochromen-3-yl) C19H20O9 | C19H20O9    | 391.1040063 | No  |
| 7088 | HMDB0130037                       | 6-((3-[(1E)-but-1-en-1-yl]-1-oxo-1H-isochromen-7-yl)ox C19H20O9 | C19H20O9    | 391.1040063 | No  |
| 7088 | HMDB0130038                       | 6-((3-[(1E)-but-1-en-1-yl]-1-oxo-1H-isochromen-6-yl)ox C19H20O9 | C19H20O9    | 391.1040063 | No  |
| 7088 | HMDB0130041                       | 6-((3-[(1E)-but-1-en-1-yl]-1-oxo-1H-isochromen-5-yl)ox C19H20O9 | C19H20O9    | 391.1040063 | No  |
| 7088 | HMDB0130042                       | 3,4,5-trihydroxy-6-(((3E)-4-(1-oxo-1H-isochromen-3-yl) C19H20O9 | C19H20O9    | 391.1040063 | No  |
| 7088 | HMDB0137957                       | 2-(4-benzoyl-3,5-dihydroxyphenoxy)-6-(hydroxymethy C19H20O9     | C19H20O9    | 391.1040063 | No  |
| 7089 | HMDB0039564                       | Marmesin rhamnoside                                             | C20H24O8    | 391.139806  | No  |
| 7092 | HMDB0015608; CHEBI:725589         | Indacaterol                                                     | C24H28N2O3  | 391.2032851 | No  |
| 7092 | HMDB0015705; CHEBI:66901          | Ivacaftor                                                       | C24H28N2O3  | 391.2032851 | No  |
| 7095 | HMDB0060730                       | 20, 22-Dihydrodigoxigenin                                       | C23H36O5    | 391.2498752 | Yes |
| 7099 | HMDB0000348                       | 3b,12a-Dihydroxy-5a-cholanoic acid                              | C24H40O4    | 391.2839807 | No  |
| 7099 | HMDB0000361; C17660               | 3b,7a-Dihydroxy-5b-cholanoic acid                               | C24H40O4    | 391.2839807 | No  |
| 7099 | HMDB0000384                       | 3a,7a-Dihydroxycholanoic acid                                   | C24H40O4    | 391.2839807 | No  |
| 7099 | HMDB0000411; C17646; CHEBI:542045 | 3a,12b-Dihydroxy-5b-cholanoic acid                              | C24H40O4    | 391.2839807 | No  |
| 7099 | HMDB0000438; CHEBI:473574         | 3b,12a-Dihydroxy-5b-cholanoic acid                              | C24H40O4    | 391.2839807 | No  |
| 7099 | HMDB0000478                       | Allodeoxycholic acid                                            | C24H40O4    | 391.2839807 | No  |
| 7099 | HMDB0000514                       | Allochenodeoxycholic acid                                       | C24H40O4    | 391.2839807 | No  |
| 7099 | HMDB0000518; C02528; CHEBI:16755  | Chenodeoxycholic acid                                           | C24H40O4    | 391.2839807 | No  |
| 7099 | HMDB0000626; C04483; CHEBI:28834  | Deoxycholic acid                                                | C24H40O4    | 391.2839807 | No  |
| 7099 | HMDB0000664                       | Isohyodeoxycholic acid                                          | C24H40O4    | 391.2839807 | No  |
| 7099 | HMDB0000686; C17662; CHEBI:43419  | Isoursodeoxycholic acid                                         | C24H40O4    | 391.2839807 | No  |
| 7099 | HMDB0000733                       | Hyodeoxycholic acid                                             | C24H40O4    | 391.2839807 | No  |
| 7099 | HMDB0000811; C15515; CHEBI:52030  | Murocholic acid                                                 | C24H40O4    | 391.2839807 | No  |
| 7099 | HMDB0000946; C07880; CHEBI:9907   | Ursodeoxycholic acid                                            | C24H40O4    | 391.2839807 | No  |
| 7099 | HMDB0002451                       | 7b,12a-Dihydroxycholanoic acid                                  | C24H40O4    | 391.2839807 | No  |
| 7099 | HMDB0002488                       | 7a,12b-dihydroxy-5b-Cholan-24-oic acid                          | C24H40O4    | 391.2839807 | No  |
| 7099 | HMDB0002536; C17661               | Isodeoxycholic acid                                             | C24H40O4    | 391.2839807 | No  |
| 7099 | HMDB0002585                       | 3b,12b-Dihydroxy-5b-cholanoic acid                              | C24H40O4    | 391.2839807 | No  |
| 7106 | HMDB0014421; C01553; CHEBI:2687   | Amsacrine                                                       | C21H19N3O3S | 392.1072028 | Yes |
| 7131 | HMDB0030817                       | 6-Hydroxymusizin 8-O-b-D-glucopyranoside                        | C19H22O9    | 393.1194171 | Yes |
| 7131 | HMDB0035734                       | 2"-Oxoaloesol 7-glucoside                                       | C19H22O9    | 393.1194171 | Yes |
| 7133 | HMDB0012530                       | 11-Hydroxyeicosatetraenoate glyceryl ester                      | C23H38O5    | 393.2647908 | Yes |
| 7133 | HMDB0013651; CHEBI:132121         | 2-(14,15-Epoxyeicosatrienoyl) Glycerol                          | C23H38O5    | 393.2647908 | Yes |
| 7136 | HMDB0035215                       | Ximenic acid                                                    | C26H50O2    | 393.3735843 | No  |
| 7136 | HMDB0035549                       | 11,13-Hexacosanedione                                           | C26H50O2    | 393.3735843 | No  |
| 7136 | HMDB0035550                       | 10,12-Hexacosanedione                                           | C26H50O2    | 393.3735843 | No  |
| 7136 | HMDB0035551                       | 7,9-Hexacosanedione                                             | C26H50O2    | 393.3735843 | No  |
| 7136 | HMDB0035552                       | 6,8-Hexacosanedione                                             | C26H50O2    | 393.3735843 | No  |
| 7136 | HMDB0035553                       | 5,7-Hexacosanedione                                             | C26H50O2    | 393.3735843 | No  |
| 7136 | HMDB0035554                       | 4,6-Hexacosanedione                                             | C26H50O2    | 393.3735843 | No  |
| 7136 | HMDB0062452; CHEBI:77525          | 17Z-hexacosenoic acid                                           | C26H50O2    | 393.3735843 | No  |
| 7155 | HMDB0034873                       | Ethyl 2-hydroxy-3-(3-indolyl)propanoate glucoside               | C19H25NO8   | 394.1531489 | No  |
| 7176 | HMDB0039953                       | 1-(3-Methylbutanoyl)-6-apiosylglucose                           | C16H28O11   | 395.1561806 | No  |
| 7178 | HMDB0000774                       | Pregnenolone sulfate                                            | C21H32O5S   | 395.1909121 | Yes |
| 7178 | HMDB0031689                       | 1-Hexanol arabinosylglucoside                                   | C17H32O10   | 395.1909121 | Yes |
| 7178 | HMDB0060382; CHEBI:35420          | 3beta-Hydroxypregn-5-en-20-one sulfate                          | C21H32O5S   | 395.1909121 | Yes |
| 7186 | HMDB0002356; CHEBI:31009          | Hexacosanoic acid                                               | C26H52O2    | 395.3890851 | No  |
| 7186 | HMDB0035628                       | 6-Hydroxy-8-hexacosanone                                        | C26H52O2    | 395.3890851 | No  |
| 7218 | HMDB0029190; CHEBI:89287          | 5-(3",4"-dihydroxyphenyl)-gamma-valerolactone-3"-O C18H22O10    | C18H22O10   | 397.1144154 | Yes |
| 7218 | HMDB0030055                       | Taraxacoside                                                    | C18H22O10   | 397.1144154 | Yes |
| 7218 | HMDB0041285                       | Picraquassioside A                                              | C18H22O10   | 397.1144154 | Yes |
| 7218 | HMDB0059988; CHEBI:88694          | 5-(3",4"-Dihydroxyphenyl)-gamma-valerolactone-3"-O C18H22O10    | C18H22O10   | 397.1144154 | Yes |
| 7218 | HMDB0059990; CHEBI:88748          | 5-(3",4"-Dihydroxyphenyl)-gamma-valerolactone-4"-O C18H22O10    | C18H22O10   | 397.1144154 | Yes |

|      |                                  |                                                                      |             |     |
|------|----------------------------------|----------------------------------------------------------------------|-------------|-----|
| 7218 | HMDB0060030; CHEBI:89537         | 5-(3'',5''-Dihydroxyphenyl)-gamma-valerolactone-O-gluc C18H22O10     | 397.1144154 | Yes |
| 7218 | HMDB0127768                      | 3,4,5-trihydroxy-6-{2-methoxy-4-[(5-oxooxolan-2-yl)methyl] C18H22O10 | 397.1144154 | Yes |
| 7218 | HMDB0127830                      | 3,4,5-trihydroxy-6-{2-methoxy-5-[(5-oxooxolan-2-yl)methyl] C18H22O10 | 397.1144154 | Yes |
| 7219 | HMDB0040121                      | Methyl 3,4-dihydroxy-5-prenylbenzoate 3-glucoside C19H26O9           | 397.151258  | No  |
| 7219 | HMDB0040896                      | Methyl (3x,10R)-dihydroxy-11-dodecene-6,8-diynoate C19H26O9          | 397.151258  | No  |
| 7219 | HMDB0132960                      | 3,4,5-trihydroxy-6-[[1-(4-methoxyphenyl)-4-methyl-3-oxo C19H26O9     | 397.151258  | No  |
| 7219 | HMDB0132964                      | 3,4,5-trihydroxy-6-[[5-(4-methoxyphenyl)-2-methyl-3-oxo C19H26O9     | 397.151258  | No  |
| 7219 | HMDB0132966                      | 3,4,5-trihydroxy-6-[[5-(4-methoxyphenyl)-2-methyl-3-oxo C19H26O9     | 397.151258  | No  |
| 7219 | HMDB0132967                      | 3,4,5-trihydroxy-6-[[1-(4-methoxyphenyl)-4-methyl-3-oxo C19H26O9     | 397.151258  | No  |
| 7243 | HMDB0031945                      | Niaziminin A C18H25NO7S                                              | 398.1278872 | Yes |
| 7243 | HMDB0041970; C11803; CHEBI:7847  | Oxmetidine C19H21N5O3S                                               | 398.1278872 | Yes |
| 7244 | HMDB0015686                      | Pipazethate C21H25N3O3S                                              | 398.1544559 | Yes |
| 7244 | HMDB0032156                      | alpha-Acetolactate decarboxylase (enzyme preparation) C21H25N3O3S    | 398.1544559 | Yes |
| 7262 | HMDB0125816                      | 3,4,5-trihydroxy-6-[(4-hydroxy-7-methoxy-2,2-dimethyl C18H24O10      | 399.1300722 | Yes |
| 7262 | HMDB0127783                      | 6-[[4-carboxy-1-(3-methoxyphenyl)butan-2-yl]oxy]-3,4 C18H24O10       | 399.1300722 | Yes |
| 7262 | HMDB0127784                      | 3,4,5-trihydroxy-6-[(4-hydroxy-5-(3-methoxyphenyl)pe C18H24O10       | 399.1300722 | Yes |
| 7262 | HMDB0127790                      | 6-[[4-(4-carboxybutyl)-2-methoxyphenoxy]-3,4,5-trihyd C18H24O10      | 399.1300722 | Yes |
| 7262 | HMDB0127791                      | 3,4,5-trihydroxy-6-[[5-(4-hydroxy-3-methoxyphenyl)pe C18H24O10       | 399.1300722 | Yes |
| 7263 | HMDB0030975                      | Corchoionoside B C19H28O9                                            | 399.1661335 | No  |
| 7264 | HMDB0036855                      | Cincassiol B C20H32O8                                                | 399.2045183 | No  |
| 7270 | HMDB0000501                      | 7-Ketocholesterol C27H44O2                                           | 399.3245535 | No  |
| 7270 | HMDB0001993; C05455; CHEBI:17899 | 7a-Hydroxy-cholestene-3-one C27H44O2                                 | 399.3245535 | No  |
| 7270 | HMDB0003550; C01561; CHEBI:17933 | Calcidiol C27H44O2                                                   | 399.3245535 | No  |
| 7270 | HMDB0006721                      | 5,6-trans-25-Hydroxyvitamin D3 C27H44O2                              | 399.3245535 | No  |
| 7270 | HMDB0006722                      | 25-Hydroxytachysterol3 C27H44O2                                      | 399.3245535 | No  |
| 7270 | HMDB0015504; CHEBI:1125553       | Alfacalcidol C27H44O2                                                | 399.3245535 | No  |
| 7270 | HMDB0034328                      | (3beta,5alpha,6a)-Cholesta-8,14-diene-3,6-diol C27H44O2              | 399.3245535 | No  |
| 7270 | HMDB0035585                      | 1-Phenyl-1,3-heneicosanedione C27H44O2                               | 399.3245535 | No  |
| 7270 | HMDB0036012                      | 5-Methyl-2,4-bis(3-methyl-2-butenyl)-6-(2-methyl-1-ox C27H44O2       | 399.3245535 | No  |
| 7270 | HMDB0039871                      | 5-(12,15-Heneicosadienyl)-1,3-benzenediol C27H44O2                   | 399.3245535 | No  |
| 7270 | HMDB0060131                      | 3beta-Hydroxy-5-cholestenal C27H44O2                                 | 399.3245535 | No  |
| 7270 | HMDB0060132                      | 27alpha-Hydroxy-8-dehydrocholesterol C27H44O2                        | 399.3245535 | No  |
| 7283 | HMDB0061107                      | Buspirone N-oxide C21H31N5O3                                         | 400.2357187 | No  |
| 7283 | HMDB0061108                      | 3''-Hydroxybuspirone C21H31N5O3                                      | 400.2357187 | No  |
| 7283 | HMDB0061109                      | 5-Hydroxybuspirone C21H31N5O3                                        | 400.2357187 | No  |
| 7283 | HMDB0061110                      | 6''-Hydroxybuspirone C21H31N5O3                                      | 400.2357187 | No  |
| 7297 | HMDB0001274; C00363; CHEBI:18075 | dTDP C10H16N2O11P2                                                   | 401.016152  | Yes |
| 7297 | HMDB0136103                      | [2,6-dihydroxy-4-(3,4,5,7-tetrahydroxy-3,4-dihydro-2H C15H14O11S     | 401.016152  | Yes |
| 7297 | HMDB0136104                      | [4,5,7-trihydroxy-2-(3,4,5-trihydroxyphenyl)-3,4-dihyd C15H14O11S    | 401.016152  | Yes |
| 7297 | HMDB0136105                      | [3,5,7-trihydroxy-2-(3,4,5-trihydroxyphenyl)-3,4-dihyd C15H14O11S    | 401.016152  | Yes |
| 7298 | HMDB0001117; C04352; CHEBI:15769 | 4-Phosphopantothienoylcysteine C12H23N2O9PS                          | 401.0760521 | Yes |
| 7299 | HMDB0059971; CHEBI:88690         | 4-Hydroxy-5-(3'',4''-dihydroxyphenyl)-valeric acid-O-gl C17H22O11    | 401.1093723 | Yes |
| 7299 | HMDB0059973; CHEBI:88688         | 4-Hydroxy-5-(3'',5''-dihydroxyphenyl)-valeric acid-O-gl C17H22O11    | 401.1093723 | Yes |
| 7299 | HMDB0127743                      | 6-[4-(4-carboxy-2-hydroxybutyl)-2-hydroxyphenoxy]-3, C17H22O11       | 401.1093723 | Yes |
| 7299 | HMDB0127744                      | 6-[5-(4-carboxy-2-hydroxybutyl)-2-hydroxyphenoxy]-3, C17H22O11       | 401.1093723 | Yes |
| 7299 | HMDB0127745                      | 6-[[5-(3,4-dihydroxyphenyl)-4-hydroxypentanoyl]oxy]- C17H22O11       | 401.1093723 | Yes |
| 7299 | HMDB0128703                      | 3,4,5-trihydroxy-6-[2-hydroxy-3,4-dimethoxy-5-(3-oxo C17H22O11       | 401.1093723 | Yes |
| 7299 | HMDB0128704                      | 3,4,5-trihydroxy-6-[6-hydroxy-2,3-dimethoxy-4-(3-oxo C17H22O11       | 401.1093723 | Yes |
| 7299 | HMDB0128718                      | 3,4,5-trihydroxy-6-[2-hydroxy-5-(3-hydroxyprop-1-en- C17H22O11       | 401.1093723 | Yes |
| 7299 | HMDB0128719                      | 3,4,5-trihydroxy-6-[6-hydroxy-4-(3-hydroxyprop-1-en- C17H22O11       | 401.1093723 | Yes |
| 7300 | HMDB0041190                      | Benzyl beta-primeveroside C18H26O10                                  | 401.1454923 | Yes |
| 7300 | HMDB0041514                      | Benzyl O-[arabinofuranosyl-(1->6)-glucoside] C18H26O10               | 401.1454923 | Yes |
| 7301 | HMDB0031763                      | Methyl 7-epi-12-hydroxyjasmonate glucoside C19H30O9                  | 401.1820189 | No  |
| 7301 | HMDB0040729                      | D-Linalool 3-(6''''-malonylglucoside) C19H30O9                       | 401.1820189 | No  |
| 7302 | HMDB0015698                      | Cinitapride C21H30N4O4                                               | 401.2166585 | No  |
| 7302 | HMDB0034159                      | Acetyl tributyl citrate C20H34O8                                     | 401.2166585 | No  |
| 7303 | HMDB0035844                      | Lucidone A C24H34O5                                                  | 401.2308724 | No  |
| 7307 | HMDB0000541                      | 7b-Hydroxy-3-oxo-5b-cholanoic acid C25H38O4                          | 401.2700871 | No  |
| 7307 | HMDB0011557                      | MG(0:0/22:6(4Z,7Z,10Z,13Z,16Z,19Z)/0:0) C25H38O4                     | 401.2700871 | No  |
| 7307 | HMDB0011587                      | MG(22:6(4Z,7Z,10Z,13Z,16Z,19Z)/0:0/0:0) C25H38O4                     | 401.2700871 | No  |
| 7320 | HMDB0037550                      | 2,4-Dihydroxy-7,8-dimethoxy-2H-1,4-benzoxazin-3(4H) C16H21NO11       | 402.1042902 | No  |

|      |                                  |                                                        |             |             |     |
|------|----------------------------------|--------------------------------------------------------|-------------|-------------|-----|
| 7341 | HMDB0029222; CHEBI:89099         | Urolithin A-3-O-glucuronide                            | C19H16O10   | 403.0672935 | No  |
| 7341 | HMDB0060022; CHEBI:89554         | Urolithin A-8-O-glucuronide                            | C19H16O10   | 403.0672935 | No  |
| 7344 | HMDB0039947                      | Pisumionoside                                          | C19H32O9    | 403.1972442 | No  |
| 7346 | HMDB0000447; C15568; CHEBI:49269 | 7a,12a-Dihydroxy-3-oxo-4-cholenoic acid                | C24H36O5    | 403.2495758 | No  |
| 7346 | HMDB0014372; C07074; CHEBI:40303 | Lovastatin                                             | C24H36O5    | 403.2495758 | No  |
| 7346 | HMDB0038152                      | Lucidone C                                             | C24H36O5    | 403.2495758 | No  |
| 7363 | HMDB0001938; D00362; CHEBI:43755 | Lisinopril                                             | C21H31N3O5  | 404.219193  | No  |
| 7382 | HMDB0127951                      | 2-hydroxy-3-([3-methoxy-4-(sulfooxy)phenyl]prop-2      | C14H14O12S  | 405.0159587 | No  |
| 7382 | HMDB0127952                      | 2-([3-(4-hydroxy-3-methoxyphenyl)prop-2-enoyl]oxy)-    | C14H14O12S  | 405.0159587 | No  |
| 7386 | HMDB0041174                      | 1-O-p-Coumaroyl-(b-D-glucose 6-O-sulfate)              | C15H18O11S  | 405.0500935 | No  |
| 7386 | HMDB0125132                      | {4-[(1E)-3-oxo-3-[(3,4,5,6-tetrahydroxyoxan-2-yl)methr | C15H18O11S  | 405.0500935 | No  |
| 7387 | HMDB0030824                      | Afzelechin 7-apioside                                  | C20H22O9    | 405.1193651 | No  |
| 7387 | HMDB0031423                      | omega-Salicyosalicin                                   | C20H22O9    | 405.1193651 | No  |
| 7387 | HMDB0038330                      | Benzyl 2,6-dihydroxybenzoate 2-glucoside               | C20H22O9    | 405.1193651 | No  |
| 7387 | HMDB0039039                      | (R)-Apiumetin glucoside                                | C20H22O9    | 405.1193651 | No  |
| 7387 | HMDB0039172                      | Flacourtin                                             | C20H22O9    | 405.1193651 | No  |
| 7387 | HMDB0040555                      | (E)-Oxyresveratrol 3''-O-b-D-glucoside                 | C20H22O9    | 405.1193651 | No  |
| 7387 | HMDB0040863                      | Piceatannol 4''-glucoside                              | C20H22O9    | 405.1193651 | No  |
| 7387 | HMDB0041265                      | Edulisin VI                                            | C20H22O9    | 405.1193651 | No  |
| 7387 | HMDB0060923                      | Naproxen O-glucuronide                                 | C20H22O9    | 405.1193651 | No  |
| 7387 | HMDB0129949                      | 3,4,5-trihydroxy-6-{3-hydroxy-5-[2-(3-hydroxyphenyl)e  | C20H22O9    | 405.1193651 | No  |
| 7387 | HMDB0129950                      | 6-{3-[2-(3,5-dihydroxyphenyl)ethyl]phenoxy}-3,4,5-trih | C20H22O9    | 405.1193651 | No  |
| 7387 | HMDB0134112                      | 2-{4-[(E)-2-(3,5-dihydroxyphenyl)ethenyl]-3-hydroxyph  | C20H22O9    | 405.1193651 | No  |
| 7387 | HMDB0134113                      | 2-{3-[(E)-2-(2,4-dihydroxyphenyl)ethenyl]-5-hydroxyph  | C20H22O9    | 405.1193651 | No  |
| 7387 | HMDB0135774                      | 3,4,5-trihydroxy-6-{3-hydroxy-5-[2-(2-hydroxyphenyl)e  | C20H22O9    | 405.1193651 | No  |
| 7387 | HMDB0135775                      | 6-{2-[2-(3,5-dihydroxyphenyl)ethyl]phenoxy}-3,4,5-trih | C20H22O9    | 405.1193651 | No  |
| 7393 | HMDB0000391; CHEBI:16390         | 7-Ketodeoxycholic acid                                 | C24H38O5    | 405.264836  | Yes |
| 7393 | HMDB0000400; CHEBI:16312         | 3,7-Dihydroxy-12-oxocholanoic acid                     | C24H38O5    | 405.264836  | Yes |
| 7393 | HMDB0000502                      | 3-Oxocholic acid                                       | C24H38O5    | 405.264836  | Yes |
| 7393 | HMDB0033399                      | Annocherin A                                           | C24H38O5    | 405.264836  | Yes |
| 7393 | HMDB0035288                      | (6b,7b,13R)-6,7-Diacetoxy-8,14-labdadiene-13-ol        | C24H38O5    | 405.264836  | Yes |
| 7393 | HMDB0062680; CHEBI:88108         | 7alpha,12alpha-dihydroxy-3-oxo-5beta-cholan-24-oic /   | C24H38O5    | 405.264836  | Yes |
| 7403 | HMDB0039895                      | 4-Mercaptobutyl glucosinolate                          | C11H21NO9S3 | 406.0317303 | Yes |
| 7409 | HMDB0013024                      | Neurotensin 11-13                                      | C21H33N3O5  | 406.2345321 | No  |
| 7410 | HMDB0011678                      | Geranylgeranylecysteine                                | C23H37NO3S  | 406.2418207 | No  |
| 7424 | HMDB0129590                      | [4-(5-hydroxy-7-methoxy-8-methyl-4-oxo-4H-chromen      | C18H16O9S   | 407.0416919 | Yes |
| 7425 | HMDB0036862; C07601              | Ginkgolide A                                           | C20H24O9    | 407.1338482 | No  |
| 7425 | HMDB0038600                      | Torachrysone 8-glucoside                               | C20H24O9    | 407.1338482 | No  |
| 7425 | HMDB0039126                      | Wybutoxine                                             | C16H20N6O7  | 407.1338482 | No  |
| 7425 | HMDB0041508                      | Marmesin galactoside                                   | C20H24O9    | 407.1338482 | No  |
| 7427 | HMDB0036836; C09071              | Cascarillin                                            | C22H32O7    | 407.2050522 | No  |
| 7427 | HMDB0036864                      | Anhydrocinnzeylanine                                   | C22H32O7    | 407.2050522 | No  |
| 7429 | HMDB0062190; C01192; CHEBI:17868 | 1-palmitoyl-dihydroxyacetone-phosphate                 | C19H37O7P   | 407.2213222 | No  |
| 7429 | HMDB0062323; CHEBI:75070         | 1-(9Z-hexadecenoyl)-glycero-3-phosphate                | C19H37O7P   | 407.2213222 | No  |
| 7430 | HMDB0032021                      | cis-Methylbixin                                        | C26H32O4    | 407.224602  | No  |
| 7430 | HMDB0039078                      | trans-Methylbixin                                      | C26H32O4    | 407.224602  | No  |
| 7430 | HMDB0041126                      | Heterophyllol                                          | C26H32O4    | 407.224602  | No  |
| 7434 | HMDB0000312; CHEBI:36240         | 3a,7a,12b-Trihydroxy-5b-cholanoic acid                 | C24H40O5    | 407.2805955 | Yes |
| 7434 | HMDB0000320                      | 3a,4b,7a-Trihydroxy-5b-cholanoic acid                  | C24H40O5    | 407.2805955 | Yes |
| 7434 | HMDB0000326; CHEBI:89219         | 1b,3a,12a-Trihydroxy-5b-cholanoic acid                 | C24H40O5    | 407.2805955 | Yes |
| 7434 | HMDB0000330                      | 3a,4b,12a-Trihydroxy-5b-cholanoic acid                 | C24H40O5    | 407.2805955 | Yes |
| 7434 | HMDB0000364; C17727              | 3a,6a,7b-Trihydroxy-5b-cholanoic acid                  | C24H40O5    | 407.2805955 | Yes |
| 7434 | HMDB0000371                      | 1,3,12-Trihydroxycholan-24-oic acid                    | C24H40O5    | 407.2805955 | Yes |
| 7434 | HMDB0000376                      | 3b,7a,12a-Trihydroxy-5a-Cholanoic acid                 | C24H40O5    | 407.2805955 | Yes |
| 7434 | HMDB0000390                      | 3a,7b,12b-Trihydroxy-5b-cholanoic acid                 | C24H40O5    | 407.2805955 | Yes |
| 7434 | HMDB0000395                      | 3b,7b,12a-Trihydroxy-5b-cholanoic acid                 | C24H40O5    | 407.2805955 | Yes |
| 7434 | HMDB0000404                      | 2b,3a,7a-Trihydroxy-5b-cholanoic acid                  | C24H40O5    | 407.2805955 | Yes |
| 7434 | HMDB0000414                      | 1b,3a,7a-Trihydroxy-5b-cholanoic acid                  | C24H40O5    | 407.2805955 | Yes |
| 7434 | HMDB0000415; C17726              | 3a,6b,7b-Trihydroxy-5b-cholanoic acid                  | C24H40O5    | 407.2805955 | Yes |
| 7434 | HMDB0000419; CHEBI:88105         | 3b,7a,12a-Trihydroxy-5b-cholanoic acid                 | C24H40O5    | 407.2805955 | Yes |
| 7434 | HMDB0000427                      | 3b,7b,12a-Trihydroxy-5a-Cholanoic acid                 | C24H40O5    | 407.2805955 | Yes |

|      |                                   |                                                        |              |             |     |
|------|-----------------------------------|--------------------------------------------------------|--------------|-------------|-----|
| 7434 | HMDB0000432                       | 3a,7b,12a-Trihydroxy-5a-Cholanoic acid                 | C24H40O5     | 407.2805955 | Yes |
| 7434 | HMDB0000505                       | Allocholic acid                                        | C24H40O5     | 407.2805955 | Yes |
| 7434 | HMDB0000506                       | Alpha-Muricholic acid                                  | C24H40O5     | 407.2805955 | Yes |
| 7434 | HMDB0000527                       | 6a,12a-Dihydroxylithocholic acid                       | C24H40O5     | 407.2805955 | Yes |
| 7434 | HMDB0000619; C00695; CHEBI:16359  | Cholic acid                                            | C24H40O5     | 407.2805955 | Yes |
| 7434 | HMDB0000760                       | Hyocholic acid                                         | C24H40O5     | 407.2805955 | Yes |
| 7434 | HMDB0000865; CHEBI:134216         | Muricholic acid                                        | C24H40O5     | 407.2805955 | Yes |
| 7434 | HMDB0000917; C17644; CHEBI:803879 | Ursolic acid                                           | C24H40O5     | 407.2805955 | Yes |
| 7447 | HMDB0040793                       | Acidissiminol epoxide                                  | C25H31NO4    | 408.2201414 | No  |
| 7463 | HMDB0030560                       | 7,11,12-Triacetoxycoumestan                            | C21H14O9     | 409.0584652 | Yes |
| 7464 | HMDB0130066                       | 3,4,5-trihydroxy-6-[2-hydroxy-1-(1-oxo-1H-isochromer   | C19H22O10    | 409.1147653 | Yes |
| 7464 | HMDB0130067                       | 3,4,5-trihydroxy-6-[(1-hydroxy-1-(1-oxo-1H-isochrome   | C19H22O10    | 409.1147653 | Yes |
| 7465 | HMDB0042005                       | Quinaprilat                                            | C23H26N2O5   | 409.177453  | Yes |
| 7475 | HMDB0001023; C11455; CHEBI:17813  | 4,4-Dimethylcholesta-8,14,24-trienol                   | C29H46O      | 409.3468744 | No  |
| 7475 | HMDB0006852; C15783               | 5-Dehydroavenasterol                                   | C29H46O      | 409.3468744 | No  |
| 7475 | HMDB0006928; C11508; CHEBI:30109  | Delta 8,14 -Sterol                                     | C29H46O      | 409.3468744 | No  |
| 7475 | HMDB0032882                       | 28-Norcyclomusalenone                                  | C29H46O      | 409.3468744 | No  |
| 7475 | HMDB0033810                       | (4alpha,5alpha)-4,14-Dimethyl-9,19-cyclocholest-20-er  | C29H46O      | 409.3468744 | No  |
| 7475 | HMDB0033825                       | Corbisterol                                            | C29H46O      | 409.3468744 | No  |
| 7475 | HMDB0034078                       | 22-Dehydroclerosterol                                  | C29H46O      | 409.3468744 | No  |
| 7475 | HMDB0034196                       | (3beta,5alpha,22E,24S)-Stigmasta-7,22,25-trien-3-ol    | C29H46O      | 409.3468744 | No  |
| 7475 | HMDB0036312                       | (3beta,22E,24R)-23-Methylergosta-5,7,22-trien-3-ol     | C29H46O      | 409.3468744 | No  |
| 7475 | HMDB0039196                       | Stigmasta-4,6-dien-3-one                               | C29H46O      | 409.3468744 | No  |
| 7484 | HMDB0061172                       | O-Desmethylvenlafaxine glucuronide                     | C20H29NO8    | 410.1809167 | Yes |
| 7488 | HMDB0015648; CHEBI:775715         | Fesoterodine                                           | C26H37NO3    | 410.2702396 | No  |
| 7510 | HMDB0060914                       | Zileuton O-glucuronide                                 | C17H20N2O8S  | 411.0844284 | No  |
| 7511 | HMDB0038347                       | Methylpicraquassioside A                               | C19H24O10    | 411.1305767 | Yes |
| 7513 | HMDB0030082                       | 5-(2,3-Dihydroxy-3-methylbutyl)-4-(3,4-epoxy-4-methy   | C21H32O8     | 411.2027487 | Yes |
| 7513 | HMDB0039636                       | Absciscic alcohol 11-glucoside                         | C21H32O8     | 411.2027487 | Yes |
| 7527 | HMDB0041868                       | Desacetylcefotaxime                                    | C14H15N5O6S2 | 412.0394399 | No  |
| 7550 | HMDB0128795                       | [2-methoxy-4-(3,5,6,7-tetrahydroxy-4-oxo-3,4-dihydro   | C16H14O11S   | 413.0176414 | No  |
| 7550 | HMDB0128796                       | [5,6,7-trihydroxy-2-(4-hydroxy-3-methoxyphenyl)-4-ox   | C16H14O11S   | 413.0176414 | No  |
| 7550 | HMDB0128806                       | {4-[2,3-dioxo-3-(2,3,4,6-tetrahydroxyphenyl)propyl]-2- | C16H14O11S   | 413.0176414 | No  |
| 7550 | HMDB0128819                       | [2-hydroxy-5-(3,5,7-trihydroxy-6-methoxy-4-oxo-3,4-di  | C16H14O11S   | 413.0176414 | No  |
| 7550 | HMDB0128820                       | [2-(3,4-dihydroxyphenyl)-5,7-dihydroxy-6-methoxy-4-c   | C16H14O11S   | 413.0176414 | No  |
| 7550 | HMDB0128831                       | {5-[2,3-dioxo-3-(2,4,6-trihydroxy-3-methoxyphenyl)prc  | C16H14O11S   | 413.0176414 | No  |
| 7550 | HMDB0134872                       | [3,5-dihydroxy-2-({7-oxo-7H-furo[3,2-g]chromen-9-yl}c  | C16H14O11S   | 413.0176414 | No  |
| 7550 | HMDB0134873                       | [4,5-dihydroxy-2-({7-oxo-7H-furo[3,2-g]chromen-9-yl}c  | C16H14O11S   | 413.0176414 | No  |
| 7552 | HMDB0127309                       | 6-(3,4-dihydroxy-6-methyl-5-oxooxan-2-yl)-5,7-dihydr   | C21H18O9     | 413.0862415 | No  |
| 7552 | HMDB0127340                       | 6-(3,4-dihydroxy-6-methyl-5-oxooxan-2-yl)-5,7-dihydr   | C21H18O9     | 413.0862415 | No  |
| 7552 | HMDB0134551                       | 3,4,5-trihydroxy-6-[(4-oxo-2-phenyl-4H-chromen-3-yl)c  | C21H18O9     | 413.0862415 | No  |
| 7553 | HMDB0032600                       | Ptelatoside A                                          | C19H26O10    | 413.1456389 | No  |
| 7555 | HMDB0030895                       | (4R,5S,7R,11x)-11,12-Dihydroxy-1(10)-spirovetiven-2-c  | C21H34O8     | 413.2178607 | No  |
| 7555 | HMDB0033150                       | (4R,5S,7R,11S)-11,12-Dihydroxy-1(10)-spirovetiven-2-c  | C21H34O8     | 413.2178607 | No  |
| 7558 | HMDB0039883                       | Ascorbyl palmitate                                     | C22H38O7     | 413.2545433 | No  |
| 7571 | HMDB0038425                       | 6-Heptenyl glucosinolate                               | C14H25NO9S2  | 414.089193  | No  |
| 7594 | HMDB0130154                       | 3,4-dihydroxy-5-(((2E)-3-(4-hydroxy-3-(sulfooxy)pheny  | C16H16O11S   | 415.0345045 | Yes |
| 7594 | HMDB0130155                       | 5-(((2E)-3-(3,4-dihydroxyphenyl)prop-2-enoyl]oxy)-3-h  | C16H16O11S   | 415.0345045 | Yes |
| 7594 | HMDB0130156                       | 5-(((2E)-3-(3,4-dihydroxyphenyl)prop-2-enoyl]oxy)-4-h  | C16H16O11S   | 415.0345045 | Yes |
| 7595 | HMDB0125858                       | {4-[3-(5-methoxy-2,2-dimethyl-2H-chromen-6-yl)prop-    | C21H20O7S    | 415.0883045 | Yes |
| 7595 | HMDB0128730                       | 6-[(6-(2-carboxyethyl)-4-methoxy-2H-1,3-benzodioxol-   | C17H20O12    | 415.0883045 | Yes |
| 7595 | HMDB0128731                       | 3,4,5-trihydroxy-6-[[3-(6-hydroxy-7-methoxy-2H-1,3-bi  | C17H20O12    | 415.0883045 | Yes |
| 7595 | HMDB0128735                       | 6-[(6-(2-carboxyethyl)-5-methoxy-2H-1,3-benzodioxol-   | C17H20O12    | 415.0883045 | Yes |
| 7595 | HMDB0128736                       | 3,4,5-trihydroxy-6-[[3-(7-hydroxy-6-methoxy-2H-1,3-bi  | C17H20O12    | 415.0883045 | Yes |
| 7596 | HMDB0034157                       | 2-Hydroxybenzaldehyde O-[xylosyl-(1->6)-glucoside]     | C18H24O11    | 415.1252046 | No  |
| 7596 | HMDB0125818                       | 6-[(4,5-dihydroxy-7-methoxy-2,2-dimethyl-3,4-dihydro   | C18H24O11    | 415.1252046 | No  |
| 7596 | HMDB0125819                       | 6-[(4,6-dihydroxy-7-methoxy-2,2-dimethyl-3,4-dihydro   | C18H24O11    | 415.1252046 | No  |
| 7596 | HMDB0125824                       | 3,4,5-trihydroxy-6-[[4-hydroxy-2-(hydroxymethyl)-7-m   | C18H24O11    | 415.1252046 | No  |
| 7596 | HMDB0127776                       | 6-[4-(4-carboxy-2-hydroxybutyl)-2-methoxyphenoxy]-3    | C18H24O11    | 415.1252046 | No  |
| 7596 | HMDB0127777                       | 3,4,5-trihydroxy-6-[[4-hydroxy-5-(4-hydroxy-3-methox   | C18H24O11    | 415.1252046 | No  |
| 7596 | HMDB0127837                       | 6-[5-(4-carboxy-2-hydroxybutyl)-2-methoxyphenoxy]-3    | C18H24O11    | 415.1252046 | No  |

|      |                                  |                                                        |             |             |     |
|------|----------------------------------|--------------------------------------------------------|-------------|-------------|-----|
| 7596 | HMDB0127838                      | 3,4,5-trihydroxy-6-[[4-hydroxy-5-(3-hydroxy-4-methox   | C18H24O11   | 415.1252046 | No  |
| 7596 | HMDB0128708                      | 6-[3-(6,7-dimethoxy-2H-1,3-benzodioxol-5-yl)propoxy]   | C18H24O11   | 415.1252046 | No  |
| 7597 | HMDB0041274                      | Phenylethyl primeveroside                              | C19H28O10   | 415.1608697 | Yes |
| 7598 | HMDB0036340                      | Ethyl 7-epi-12-hydroxyjasmonate glucoside              | C20H32O9    | 415.1975077 | Yes |
| 7599 | HMDB0015389; CHEBI:204734        | Desonide                                               | C24H32O6    | 415.2150947 | Yes |
| 7599 | HMDB0030522                      | Citreoivridin D                                        | C24H32O6    | 415.2150947 | Yes |
| 7599 | HMDB0030749                      | Heterotropan                                           | C24H32O6    | 415.2150947 | Yes |
| 7599 | HMDB0035849                      | Armillyl everninate                                    | C24H32O6    | 415.2150947 | Yes |
| 7599 | HMDB0039145                      | Diasarone 2                                            | C24H32O6    | 415.2150947 | Yes |
| 7599 | HMDB0134777                      | 7-[(2,6-dihydroxy-5-(hydroxymethyl)-2,5,8a-trimethyl-  | C24H32O6    | 415.2150947 | Yes |
| 7599 | HMDB0134778                      | 7-[(2,6-dihydroxy-2-(hydroxymethyl)-5,5,8a-trimethyl-  | C24H32O6    | 415.2150947 | Yes |
| 7599 | HMDB0134779                      | 7-[(2,6-dihydroxy-8a-(hydroxymethyl)-2,5,5-trimethyl-  | C24H32O6    | 415.2150947 | Yes |
| 7599 | HMDB0134780                      | 7-[(2,6-dihydroxy-2,5,5,8a-tetramethyl-decahydronap    | C24H32O6    | 415.2150947 | Yes |
| 7599 | HMDB0134781                      | 7-[(2,6-dihydroxy-2,5,5,8a-tetramethyl-decahydronap    | C24H32O6    | 415.2150947 | Yes |
| 7599 | HMDB0134782                      | 7-[(2,6-dihydroxy-2,5,5,8a-tetramethyl-decahydronap    | C24H32O6    | 415.2150947 | Yes |
| 7599 | HMDB0134783                      | 7-[(2,4a,6-trihydroxy-2,5,5,8a-tetramethyl-decahydron  | C24H32O6    | 415.2150947 | Yes |
| 7599 | HMDB0134784                      | 7-[(2,4,6-trihydroxy-2,5,5,8a-tetramethyl-decahydrona  | C24H32O6    | 415.2150947 | Yes |
| 7599 | HMDB0134785                      | 7-[(2,3,6-trihydroxy-2,5,5,8a-tetramethyl-decahydrona  | C24H32O6    | 415.2150947 | Yes |
| 7599 | HMDB0134786                      | 7-[(1,2,6-trihydroxy-2,5,5,8a-tetramethyl-decahydrona  | C24H32O6    | 415.2150947 | Yes |
| 7599 | HMDB0134787                      | 7-[(2,6,8-trihydroxy-2,5,5,8a-tetramethyl-decahydrona  | C24H32O6    | 415.2150947 | Yes |
| 7599 | HMDB0134788                      | 7-[(2,6,7-trihydroxy-2,5,5,8a-tetramethyl-decahydrona  | C24H32O6    | 415.2150947 | Yes |
| 7607 | HMDB0000430; CHEBI:89324         | 24,25-Dihydroxyvitamin D                               | C27H44O3    | 415.3211891 | No  |
| 7607 | HMDB0001420; CHEBI:89079         | 25,26-dihydroxyvitamin D                               | C27H44O3    | 415.3211891 | No  |
| 7607 | HMDB0001903; C01673; CHEBI:17823 | Calcitriol                                             | C27H44O3    | 415.3211891 | No  |
| 7607 | HMDB0002197; C05457; CHEBI:28477 | 7a,12a-Dihydroxy-cholestene-3-one                      | C27H44O3    | 415.3211891 | No  |
| 7607 | HMDB0006226                      | 24R,25-Dihydroxyvitamin D3                             | C27H44O3    | 415.3211891 | No  |
| 7607 | HMDB0006720                      | 23S,25-dihydroxyvitamin D3                             | C27H44O3    | 415.3211891 | No  |
| 7607 | HMDB0012453; C17333              | 3 beta-Hydroxy-5-cholestenoate                         | C27H44O3    | 415.3211891 | No  |
| 7607 | HMDB0012457; C17331              | 7 alpha,24-Dihydroxy-4-cholesten-3-one                 | C27H44O3    | 415.3211891 | No  |
| 7607 | HMDB0012459; C17336              | 7 alpha,26-Dihydroxy-4-cholesten-3-one                 | C27H44O3    | 415.3211891 | No  |
| 7607 | HMDB0015046; C08127; CHEBI:7931  | Paricalcitol                                           | C27H44O3    | 415.3211891 | No  |
| 7607 | HMDB0030024; C03963; CHEBI:15578 | Sarsasapogenin                                         | C27H44O3    | 415.3211891 | No  |
| 7607 | HMDB0030047; C16819              | Neotigogenin                                           | C27H44O3    | 415.3211891 | No  |
| 7607 | HMDB0030048; C08913; CHEBI:28933 | Smilagenin                                             | C27H44O3    | 415.3211891 | No  |
| 7607 | HMDB0035300                      | Octadecyl cis-p-coumarate                              | C27H44O3    | 415.3211891 | No  |
| 7607 | HMDB0060133                      | (24R)-24,25-Dihydroxycalcitol                          | C27H44O3    | 415.3211891 | No  |
| 7607 | HMDB0060425; C17332              | 7alpha,25-Dihydroxy-4-cholesten-3-one                  | C27H44O3    | 415.3211891 | No  |
| 7607 | HMDB0060508; C07712              | Secalicerol                                            | C27H44O3    | 415.3211891 | No  |
| 7607 | HMDB0062401; C17331; CHEBI:48701 | 7alpha,24-dihydroxycholest-4-en-3-one                  | C27H44O3    | 415.3211891 | No  |
| 7607 | HMDB0062610; CHEBI:87476         | (25R)-7alpha,26-dihydroxycholest-4-en-3-one            | C27H44O3    | 415.3211891 | No  |
| 7607 | HMDB0062736; CHEBI:86115         | (25R)-3beta,4beta-dihydroxycholest-5-en-26-al          | C27H44O3    | 415.3211891 | No  |
| 7632 | HMDB0128381                      | 3-[3,5-dihydroxy-4-(sulfooxy)benzoyloxy]-2,4,5-trihydr | C14H10O13S  | 416.9784374 | No  |
| 7632 | HMDB0128391                      | 3-hydroxy-4-(sulfooxy)-5-(2,3,4,5-tetrahydroxybenzoyl  | C14H10O13S  | 416.9784374 | No  |
| 7632 | HMDB0128400                      | 5-[3,5-dihydroxy-4-(sulfooxy)benzoyloxy]-2,3,4-trihydr | C14H10O13S  | 416.9784374 | No  |
| 7635 | HMDB0034590                      | Shoyuflavone C                                         | C19H14O11   | 417.0468075 | No  |
| 7638 | HMDB0040353                      | 2-[4-(3-Hydroxypropyl)-2-methoxyphenoxy]-1,3-propa     | C19H30O10   | 417.1766077 | Yes |
| 7669 | HMDB0037483                      | 2'',4'',6''-Trihydroxydihydrochalcone 2''-glucoside    | C21H24O9    | 419.1337806 | No  |
| 7669 | HMDB0037484                      | 2'',4'',6''-Trihydroxydihydrochalcone 4''-glucoside    | C21H24O9    | 419.1337806 | No  |
| 7669 | HMDB0129923                      | 3,4,5-trihydroxy-6-[3-[2-(3-hydroxyphenyl)ethyl]-5-me  | C21H24O9    | 419.1337806 | No  |
| 7669 | HMDB0129924                      | 3,4,5-trihydroxy-6-[3-[2-(3-hydroxy-5-methoxyphenyl)]  | C21H24O9    | 419.1337806 | No  |
| 7669 | HMDB0135394                      | 3,4,5-trihydroxy-6-[4-hydroxy-2-(1-hydroxy-3-phenylpr  | C21H24O9    | 419.1337806 | No  |
| 7669 | HMDB0135395                      | 3,4,5-trihydroxy-6-[4-hydroxy-3-(1-hydroxy-3-phenylpr  | C21H24O9    | 419.1337806 | No  |
| 7669 | HMDB0135762                      | 3,4,5-trihydroxy-6-[3-[2-(2-hydroxyphenyl)ethyl]-5-me  | C21H24O9    | 419.1337806 | No  |
| 7669 | HMDB0135763                      | 3,4,5-trihydroxy-6-[2-[2-(3-hydroxy-5-methoxyphenyl)]  | C21H24O9    | 419.1337806 | No  |
| 7671 | HMDB0015354; CHEBI:894445        | Aminophylline                                          | C16H24N10O4 | 419.191835  | Yes |
| 7712 | HMDB0032853                      | 3-(1,1-Dimethylallyl)scopoletin 7-glucoside            | C21H26O9    | 421.1526335 | No  |
| 7714 | HMDB0032386; C07874              | 2-Methylacetophenone                                   | C20H38O7S   | 421.2250795 | No  |
| 7732 | HMDB0006461; CHEBI:72715         | Linoelaidyl carnitine                                  | C25H45NO4   | 422.3261575 | No  |
| 7732 | HMDB0006469; CHEBI:84098         | Linoleyl carnitine                                     | C25H45NO4   | 422.3261575 | No  |
| 7747 | HMDB0005022; C01844; CHEBI:63618 | Pravastatin                                            | C23H36O7    | 423.2392109 | No  |
| 7750 | HMDB0000307                      | 1b-Hydroxycholic acid                                  | C24H40O6    | 423.2752504 | No  |

|      |                                  |                                                                                                                |             |             |     |
|------|----------------------------------|----------------------------------------------------------------------------------------------------------------|-------------|-------------|-----|
| 7750 | HMDB0000311                      | 3b,4b,7a,12a-Tetrahydroxy-5b-cholanoic acid                                                                    | C24H40O6    | 423.2752504 | No  |
| 7750 | HMDB0000316                      | 2b,3a,7a,12a-Tetrahydroxy-5b-cholanoic acid                                                                    | C24H40O6    | 423.2752504 | No  |
| 7750 | HMDB0000340                      | 3a,7a,12a,19-Tetrahydroxy-5b-cholanoic acid                                                                    | C24H40O6    | 423.2752504 | No  |
| 7750 | HMDB0000367                      | 3a,6b,7b,12a-Tetrahydroxy-5b-cholanoic acid                                                                    | C24H40O6    | 423.2752504 | No  |
| 7750 | HMDB0000377                      | 3a,6b,7b,12b-Tetrahydroxy-5b-cholanoic acid                                                                    | C24H40O6    | 423.2752504 | No  |
| 7750 | HMDB0000399                      | 3a,6b,7a,12a-Tetrahydroxy-5b-cholanoic acid                                                                    | C24H40O6    | 423.2752504 | No  |
| 7750 | HMDB0000433                      | 1,3,7,12-Tetrahydroxycholan-24-oic acid                                                                        | C24H40O6    | 423.2752504 | No  |
| 7750 | HMDB0000437                      | 3a,4b,7a,12a-Tetrahydroxy-5b-cholanoic acid                                                                    | C24H40O6    | 423.2752504 | No  |
| 7750 | HMDB0013158                      | 1b,3a,7b-Trihydroxy-5b-cholanoic acid                                                                          | C24H40O6    | 423.2752504 | No  |
| 7750 | HMDB0013192                      | 3a,7b,21-Trihydroxy-5b-cholanoic acid                                                                          | C24H40O6    | 423.2752504 | No  |
| 7752 | HMDB0006327; C14153; CHEBI:33270 | Alpha-Tocotrienol                                                                                              | C29H44O2    | 423.3270167 | No  |
| 7752 | HMDB0038656                      | (22E,24R)-Stigmasta-4,22-diene-3,6-dione                                                                       | C29H44O2    | 423.3270167 | No  |
| 7755 | HMDB0002348; CHEBI:31001         | Octacosanoic acid                                                                                              | C28H56O2    | 423.4206797 | No  |
| 7755 | HMDB0033784                      | 28-Hydroxy-7-octacosanone                                                                                      | C28H56O2    | 423.4206797 | No  |
| 7755 | HMDB0040885                      | 10-Octacosene-1,12-diol                                                                                        | C28H56O2    | 423.4206797 | No  |
| 7768 | HMDB0060856                      | O-Desmethyl-tramado glucuronide                                                                                | C21H31NO8   | 424.197249  | No  |
| 7768 | HMDB0061167                      | N,O-Didesmethylvenlafaxine glucuronide                                                                         | C21H31NO8   | 424.197249  | No  |
| 7830 | HMDB0000851; CHEBI:88539         | Pyridinoline                                                                                                   | C18H28N4O8  | 427.1807822 | Yes |
| 7832 | HMDB0035610                      | Taraxacolide 1-O-b-D-glucopyranoside                                                                           | C21H32O9    | 427.197145  | Yes |
| 7834 | HMDB0015163; C07469; CHEBI:5959  | Irbesartan                                                                                                     | C25H28N6O   | 427.2244922 | No  |
| 7836 | HMDB0003822; C02530              | Cholesteryl acetate                                                                                            | C29H48O2    | 427.3577498 | No  |
| 7836 | HMDB0012168                      | 4alpha-Formyl-4beta-methyl-5alpha-cholesta-8-en-3beta-ol                                                       | C29H48O2    | 427.3577498 | No  |
| 7836 | HMDB0012170                      | 4alpha-Hydroxymethyl-4beta-methyl-5alpha-cholesta-8-en-3beta-ol                                                | C29H48O2    | 427.3577498 | No  |
| 7836 | HMDB0034422                      | 3-Hydroxystigmast-5-en-7-one                                                                                   | C29H48O2    | 427.3577498 | No  |
| 7836 | HMDB0036018                      | Mangiferdesmethylursanone                                                                                      | C29H48O2    | 427.3577498 | No  |
| 7836 | HMDB0039498                      | (6beta,24R)-6-Hydroxystigmast-4-en-3-one                                                                       | C29H48O2    | 427.3577498 | No  |
| 7836 | HMDB0039822                      | Stigmastane-3,6-dione                                                                                          | C29H48O2    | 427.3577498 | No  |
| 7836 | HMDB0041112                      | (3alpha,5alpha,7alpha)-14-Methylergosta-9(11),24(28)-diene-3-one                                               | C29H48O2    | 427.3577498 | No  |
| 7836 | HMDB0059643                      | 3-beta-Hydroxy-4-beta-methyl-5-alpha-cholest-7-ene-2-one                                                       | C29H48O2    | 427.3577498 | No  |
| 7836 | HMDB0062388; CHEBI:87046         | 4?-formyl-4?-methyl-5?-cholesta-8-en-3?-ol                                                                     | C29H48O2    | 427.3577498 | No  |
| 7836 | HMDB0062390; CHEBI:87289         | 4?-hydroxymethyl-4?-methyl-5?-cholesta-8,24-dien-3-one                                                         | C29H48O2    | 427.3577498 | No  |
| 7849 | HMDB0013855                      | Sulfamethoxazole N1-glucuronide                                                                                | C16H19N3O9S | 428.0774393 | No  |
| 7854 | HMDB0062336; CHEBI:134021        | N-Oleoyl phenylalanine                                                                                         | C27H43NO3   | 428.3148087 | No  |
| 7870 | HMDB0033587                      | Coumestrin                                                                                                     | C21H18O10   | 429.0807648 | Yes |
| 7870 | HMDB0041717                      | Daidzein 4"-O-glucuronide                                                                                      | C21H18O10   | 429.0807648 | Yes |
| 7870 | HMDB0041718                      | Daidzein 7-O-glucuronide                                                                                       | C21H18O10   | 429.0807648 | Yes |
| 7870 | HMDB0127308                      | 6-(3,4-dihydroxy-6-methyl-5-oxooxan-2-yl)-2-(3,4-dihydroxy-6-methyl-5-oxooxan-2-yl)-4-oxo-2-phenyl-4H-chromene | C21H18O10   | 429.0807648 | Yes |
| 7870 | HMDB0129981                      | 3,4,5-trihydroxy-6-[(5-hydroxy-4-oxo-3-phenyl-4H-chromen-2-yl)methyl]-4-oxo-2-phenyl-4H-chromene               | C21H18O10   | 429.0807648 | Yes |
| 7870 | HMDB0132466                      | 3,4,5-trihydroxy-6-[(5-hydroxy-4-oxo-2-phenyl-4H-chromen-2-yl)methyl]-4-oxo-2-phenyl-4H-chromene               | C21H18O10   | 429.0807648 | Yes |
| 7870 | HMDB0132467                      | 3,4,5-trihydroxy-6-[(7-hydroxy-4-oxo-2-phenyl-4H-chromen-2-yl)methyl]-4-oxo-2-phenyl-4H-chromene               | C21H18O10   | 429.0807648 | Yes |
| 7870 | HMDB0133342                      | 3,4,5-trihydroxy-6-[(2-(3-hydroxyphenyl)-4-oxo-4H-chromen-2-yl)methyl]-4-oxo-2-phenyl-4H-chromene              | C21H18O10   | 429.0807648 | Yes |
| 7870 | HMDB0133343                      | 3,4,5-trihydroxy-6-[3-(7-hydroxy-4-oxo-4H-chromen-2-yl)-2-methyl]-4-oxo-2-phenyl-4H-chromene                   | C21H18O10   | 429.0807648 | Yes |
| 7870 | HMDB0134552                      | 3,4,5-trihydroxy-6-[2-(3-hydroxy-4-oxo-4H-chromen-2-yl)-2-methyl]-4-oxo-2-phenyl-4H-chromene                   | C21H18O10   | 429.0807648 | Yes |
| 7870 | HMDB0134553                      | 3,4,5-trihydroxy-6-[(2-(2-hydroxyphenyl)-4-oxo-4H-chromen-2-yl)methyl]-4-oxo-2-phenyl-4H-chromene              | C21H18O10   | 429.0807648 | Yes |
| 7870 | HMDB0134554                      | 3,4,5-trihydroxy-6-[(3-hydroxy-4-oxo-2-phenyl-4H-chromen-2-yl)methyl]-4-oxo-2-phenyl-4H-chromene               | C21H18O10   | 429.0807648 | Yes |
| 7870 | HMDB0134555                      | 3,4,5-trihydroxy-6-[(6-hydroxy-4-oxo-2-phenyl-4H-chromen-2-yl)methyl]-4-oxo-2-phenyl-4H-chromene               | C21H18O10   | 429.0807648 | Yes |
| 7870 | HMDB0134556                      | 3,4,5-trihydroxy-6-[(3-hydroxy-4-oxo-2-phenyl-4H-chromen-2-yl)methyl]-4-oxo-2-phenyl-4H-chromene               | C21H18O10   | 429.0807648 | Yes |
| 7870 | HMDB0134557                      | 3,4,5-trihydroxy-6-[(7-hydroxy-4-oxo-2-phenyl-4H-chromen-2-yl)methyl]-4-oxo-2-phenyl-4H-chromene               | C21H18O10   | 429.0807648 | Yes |
| 7870 | HMDB0134558                      | 3,4,5-trihydroxy-6-[3-(3-hydroxy-4-oxo-4H-chromen-2-yl)-2-methyl]-4-oxo-2-phenyl-4H-chromene                   | C21H18O10   | 429.0807648 | Yes |
| 7870 | HMDB0134559                      | 3,4,5-trihydroxy-6-[(2-(3-hydroxyphenyl)-4-oxo-4H-chromen-2-yl)methyl]-4-oxo-2-phenyl-4H-chromene              | C21H18O10   | 429.0807648 | Yes |
| 7870 | HMDB0134561                      | 3,4,5-trihydroxy-6-[4-(3-hydroxy-4-oxo-4H-chromen-2-yl)-2-methyl]-4-oxo-2-phenyl-4H-chromene                   | C21H18O10   | 429.0807648 | Yes |
| 7870 | HMDB0134562                      | 3,4,5-trihydroxy-6-[(2-(4-hydroxyphenyl)-4-oxo-4H-chromen-2-yl)methyl]-4-oxo-2-phenyl-4H-chromene              | C21H18O10   | 429.0807648 | Yes |
| 7870 | HMDB0134563                      | 3,4,5-trihydroxy-6-[(3-hydroxy-4-oxo-2-phenyl-4H-chromen-2-yl)methyl]-4-oxo-2-phenyl-4H-chromene               | C21H18O10   | 429.0807648 | Yes |
| 7870 | HMDB0134564                      | 3,4,5-trihydroxy-6-[(5-hydroxy-4-oxo-2-phenyl-4H-chromen-2-yl)methyl]-4-oxo-2-phenyl-4H-chromene               | C21H18O10   | 429.0807648 | Yes |
| 7872 | HMDB0032622                      | Phenethyl rutinoside                                                                                           | C20H30O10   | 429.1767649 | No  |
| 7874 | HMDB0015353; CHEBI:3207          | Budesonide                                                                                                     | C25H34O6    | 429.230675  | Yes |
| 7874 | HMDB0033080                      | Antibiotic CJ 15544                                                                                            | C25H34O6    | 429.230675  | Yes |
| 7874 | HMDB0033081                      | Antibiotic CP 412065                                                                                           | C25H34O6    | 429.230675  | Yes |
| 7874 | HMDB0034659                      | Homofukinolide                                                                                                 | C25H34O6    | 429.230675  | Yes |
| 7874 | HMDB0040990                      | 3b,6b-Diangeloyloxy-7(11)-eremophilene-12,8b-olide                                                             | C25H34O6    | 429.230675  | Yes |
| 7880 | HMDB0035640                      | Sintaxanthin                                                                                                   | C31H42O     | 429.3168163 | No  |

|      |                                  |                                                        |           |             |     |
|------|----------------------------------|--------------------------------------------------------|-----------|-------------|-----|
| 7881 | HMDB0001893; C02477; CHEBI:18145 | Alpha-Tocopherol                                       | C29H50O2  | 429.3735658 | No  |
| 7881 | HMDB0012171                      | 4alpha-Hydroxymethyl-4beta-methyl-5alpha-cholesta-     | C29H50O2  | 429.3735658 | No  |
| 7881 | HMDB0030022                      | Ikshusterol                                            | C29H50O2  | 429.3735658 | No  |
| 7881 | HMDB0059642                      | 4-beta-Hydroxymethyl-4-alpha-methyl-5-alpha-cholest    | C29H50O2  | 429.3735658 | No  |
| 7881 | HMDB0062391; CHEBI:87045         | 4?-hydroxymethyl-4?-methyl-5?-cholesta-8-en-3?-ol      | C29H50O2  | 429.3735658 | No  |
| 7907 | HMDB0029501                      | alpha-Rhamnorobin                                      | C21H20O10 | 431.1005975 | No  |
| 7907 | HMDB0029577                      | 6-Hydroxydaidzein 4"-glucoside                         | C21H20O10 | 431.1005975 | No  |
| 7907 | HMDB0029679                      | 1,8-Dihydroxy-3-hydroxymethylanthraquinone 8-O-b-l     | C21H20O10 | 431.1005975 | No  |
| 7907 | HMDB0033982                      | Isogenistein 7-glucoside                               | C21H20O10 | 431.1005975 | No  |
| 7907 | HMDB0033988; C09126; CHEBI:27514 | Genistin                                               | C21H20O10 | 431.1005975 | No  |
| 7907 | HMDB0034405                      | w-O-beta-D-Glucopyranosylaloeemodin                    | C21H20O10 | 431.1005975 | No  |
| 7907 | HMDB0037340; C04608; CHEBI:16778 | Cosmosiin                                              | C21H20O10 | 431.1005975 | No  |
| 7907 | HMDB0038293                      | 1-O-beta-D-Glucopyranosylaloeemodin                    | C21H20O10 | 431.1005975 | No  |
| 7907 | HMDB0038740                      | Genistein 5-glucoside                                  | C21H20O10 | 431.1005975 | No  |
| 7907 | HMDB0038887                      | Glucoemodin                                            | C21H20O10 | 431.1005975 | No  |
| 7907 | HMDB0038898                      | 6-C-Fucosylluteolin                                    | C21H20O10 | 431.1005975 | No  |
| 7907 | HMDB0040542                      | Kaempferol 3-O-alpha-L-rhamnofuranoside                | C21H20O10 | 431.1005975 | No  |
| 7907 | HMDB0041591                      | Apigenin 4"-O-glucoside                                | C21H20O10 | 431.1005975 | No  |
| 7907 | HMDB0041722                      | Dihydrodaidzein 7-O-glucuronide                        | C21H20O10 | 431.1005975 | No  |
| 7907 | HMDB0126551                      | 3,5-dihydroxy-2-(4-hydroxyphenyl)-7-[(3,4,5-trihydroxy | C21H20O10 | 431.1005975 | No  |
| 7907 | HMDB0127106                      | 5,7-dihydroxy-2-(4-hydroxyphenyl)-6-[3,4,5-trihydroxy  | C21H20O10 | 431.1005975 | No  |
| 7907 | HMDB0127129                      | 5,7-dihydroxy-2-(4-hydroxyphenyl)-8-[3,4,5-trihydroxy  | C21H20O10 | 431.1005975 | No  |
| 7907 | HMDB0127134                      | 5,6,7-trihydroxy-2-phenyl-8-[3,4,5-trihydroxy-6-(hydro | C21H20O10 | 431.1005975 | No  |
| 7907 | HMDB0127136                      | 5,7-dihydroxy-2-(3-hydroxyphenyl)-8-[3,4,5-trihydroxy  | C21H20O10 | 431.1005975 | No  |
| 7907 | HMDB0127223                      | 5,6-dihydroxy-2-(4-hydroxyphenyl)-7-methoxy-8-(3,4,5   | C21H20O10 | 431.1005975 | No  |
| 7907 | HMDB0127224                      | 2-(3,4-dihydroxyphenyl)-5-hydroxy-7-methoxy-8-(3,4,5   | C21H20O10 | 431.1005975 | No  |
| 7907 | HMDB0127294                      | 5,7-dihydroxy-2-(4-hydroxy-3-methoxyphenyl)-8-(3,4,5   | C21H20O10 | 431.1005975 | No  |
| 7907 | HMDB0127358                      | 5,7-dihydroxy-2-(3-hydroxyphenyl)-6-[3,4,5-trihydroxy  | C21H20O10 | 431.1005975 | No  |
| 7907 | HMDB0127485                      | 5,7-dihydroxy-2-(4-hydroxyphenyl)-3-[(3,4,5-trihydroxy | C21H20O10 | 431.1005975 | No  |
| 7907 | HMDB0128089                      | 3,4,5-trihydroxy-6-[(5-hydroxy-4-oxo-2-phenyl-3,4-dihy | C21H20O10 | 431.1005975 | No  |
| 7907 | HMDB0128090                      | 3,4,5-trihydroxy-6-[(7-hydroxy-4-oxo-2-phenyl-3,4-dihy | C21H20O10 | 431.1005975 | No  |
| 7907 | HMDB0128094                      | 6-[3,5-dihydroxy-2-(3-phenylprop-2-enoyl)phenoxy]-3,   | C21H20O10 | 431.1005975 | No  |
| 7907 | HMDB0128095                      | 6-[3,5-dihydroxy-4-(3-phenylprop-2-enoyl)phenoxy]-3,   | C21H20O10 | 431.1005975 | No  |
| 7907 | HMDB0128107                      | 6-[3,5-dihydroxy-2-[(2E)-3-phenylprop-2-enoyl]phenox   | C21H20O10 | 431.1005975 | No  |
| 7907 | HMDB0129987                      | 3,4,5-trihydroxy-6-[(7-hydroxy-4-oxo-3-phenyl-3,4-dihy | C21H20O10 | 431.1005975 | No  |
| 7907 | HMDB0129988                      | 3,4,5-trihydroxy-6-[(5-hydroxy-4-oxo-3-phenyl-3,4-dihy | C21H20O10 | 431.1005975 | No  |
| 7907 | HMDB0134579                      | 3,4,5-trihydroxy-6-[(8-hydroxy-4-oxo-2-phenyl-3,4-dihy | C21H20O10 | 431.1005975 | No  |
| 7907 | HMDB0141940                      | 2-(3,4-dihydroxyphenyl)-7-[(3,4,5-trihydroxy-6-(hydrox | C21H20O10 | 431.1005975 | No  |
| 7908 | HMDB0031723                      | Trichocarposide                                        | C22H24O9  | 431.1333976 | Yes |
| 7908 | HMDB0033855; C16223              | Medicocarpin                                           | C22H24O9  | 431.1333976 | Yes |
| 7908 | HMDB0037689                      | 3-Methoxynobiletin                                     | C22H24O9  | 431.1333976 | Yes |
| 7908 | HMDB0039927                      | 4"-O-Methylglucoliquiritigenin                         | C22H24O9  | 431.1333976 | Yes |
| 7908 | HMDB0040503                      | Pinostrobin 5-glucoside                                | C22H24O9  | 431.1333976 | Yes |
| 7908 | HMDB0130340                      | 3,4,5-trihydroxy-6-[2-[(1E)-3-(4-hydroxy-2-methoxyph   | C22H24O9  | 431.1333976 | Yes |
| 7908 | HMDB0130341                      | 3,4,5-trihydroxy-6-[4-[3-(2-hydroxyphenyl)prop-2-en-1  | C22H24O9  | 431.1333976 | Yes |
| 7908 | HMDB0130344                      | 3,4,5-trihydroxy-6-[6-hydroxy-2-methoxy-3-[(2E)-3-ph   | C22H24O9  | 431.1333976 | Yes |
| 7908 | HMDB0130345                      | 3,4,5-trihydroxy-6-[2-hydroxy-3-methoxy-4-[(2E)-3-ph   | C22H24O9  | 431.1333976 | Yes |
| 7908 | HMDB0130348                      | 3,4,5-trihydroxy-6-[2-hydroxy-4-methoxy-5-(3-phenylp   | C22H24O9  | 431.1333976 | Yes |
| 7908 | HMDB0130349                      | 3,4,5-trihydroxy-6-[2-hydroxy-5-methoxy-4-(3-phenylp   | C22H24O9  | 431.1333976 | Yes |
| 7908 | HMDB0130351                      | 3,4,5-trihydroxy-6-[4-[(1E)-3-(4-hydroxy-2-methoxyph   | C22H24O9  | 431.1333976 | Yes |
| 7908 | HMDB0130352                      | 3,4,5-trihydroxy-6-[4-[3-(4-hydroxyphenyl)prop-2-en-1  | C22H24O9  | 431.1333976 | Yes |
| 7908 | HMDB0130354                      | 3,4,5-trihydroxy-6-[3-[(1E)-3-(4-hydroxy-2-methoxyph   | C22H24O9  | 431.1333976 | Yes |
| 7908 | HMDB0130355                      | 3,4,5-trihydroxy-6-[4-[3-(3-hydroxyphenyl)prop-2-en-1  | C22H24O9  | 431.1333976 | Yes |
| 7908 | HMDB0130357                      | 3,4,5-trihydroxy-6-[3-methoxy-4-[(3-phenyloxiran-2-yl] | C22H24O9  | 431.1333976 | Yes |
| 7908 | HMDB0130995                      | 6-[4-[(E)-2-(3,5-dimethoxyphenyl)ethenyl]phenoxy]-3,   | C22H24O9  | 431.1333976 | Yes |
| 7908 | HMDB0135632                      | 3,4,5-trihydroxy-6-[2-[3-(4-methoxyphenyl)-3-oxoprop   | C22H24O9  | 431.1333976 | Yes |
| 7908 | HMDB0135633                      | 3,4,5-trihydroxy-6-[3-(4-methoxyphenyl)-3-oxo-1-pher   | C22H24O9  | 431.1333976 | Yes |
| 7908 | HMDB0135635                      | 3,4,5-trihydroxy-6-[5-methoxy-2-(3-phenylpropanoyl)]   | C22H24O9  | 431.1333976 | Yes |
| 7908 | HMDB0135636                      | 3,4,5-trihydroxy-6-[3-[3-(4-methoxyphenyl)-3-oxoprop   | C22H24O9  | 431.1333976 | Yes |
| 7908 | HMDB0135638                      | 3,4,5-trihydroxy-6-[4-[3-(4-methoxyphenyl)-3-oxoprop   | C22H24O9  | 431.1333976 | Yes |
| 7910 | HMDB0038787                      | Melleolide B                                           | C24H32O7  | 431.2075177 | Yes |

|      |                                      |                                                         |           |             |     |
|------|--------------------------------------|---------------------------------------------------------|-----------|-------------|-----|
| 7910 | HMDB0038793                          | Melleolide G                                            | C24H32O7  | 431.2075177 | Yes |
| 7911 | HMDB0062316; CHEBI:74933             | 1-(6Z,9Z,12Z-octadecatrienoyl)-glycero-3-phosphate      | C21H37O7P | 431.2206177 | Yes |
| 7911 | HMDB0062320; CHEBI:74831             | 1-(9Z,12Z,15Z-octadecatrienoyl)-glycero-3-phosphate     | C21H37O7P | 431.2206177 | Yes |
| 7911 | HMDB0114743                          | LPA(18:3(6Z,9Z,12Z)/0:0)                                | C21H37O7P | 431.2206177 | Yes |
| 7911 | HMDB0114744                          | LPA(18:3(9Z,12Z,15Z)/0:0)                               | C21H37O7P | 431.2206177 | Yes |
| 7912 | HMDB0037823                          | Glucosyl (2E,6E,10x)-10,11-dihydroxy-2,6-farnesadienc   | C21H36O9  | 431.22861   | Yes |
| 7914 | HMDB0006228; CHEBI:47799             | 24-Hydroxycalcitriol                                    | C27H44O4  | 431.3185578 | No  |
| 7914 | HMDB0012454; HMDB0062211; C17335; CH | 3beta,7alpha-Dihydroxy-5-cholestenoate                  | C27H44O4  | 431.3185578 | No  |
| 7914 | HMDB0030702                          | Neochlorogenin                                          | C27H44O4  | 431.3185578 | No  |
| 7914 | HMDB0033769                          | Rockogenin                                              | C27H44O4  | 431.3185578 | No  |
| 7914 | HMDB0060134; CHEBI:47803             | 23S,25,26-Trihydroxyvitamin D3                          | C27H44O4  | 431.3185578 | No  |
| 7914 | HMDB0062399; CHEBI:48714             | 4-cholesten-7?,12?,24-triol-3-one                       | C27H44O4  | 431.3185578 | No  |
| 7914 | HMDB0062400; CHEBI:48833             | 7alpha,12alpha,26-trihydroxycholest-4-en-3-one          | C27H44O4  | 431.3185578 | No  |
| 7914 | HMDB0062686; CHEBI:90970             | 1alpha,23(S),25-trihydroxyvitamin D3                    | C27H44O4  | 431.3185578 | No  |
| 7914 | HMDB0062712; CHEBI:72727             | 3alpha,7beta-dihydroxy-5beta-cholest-24-en-26-oic Ac    | C27H44O4  | 431.3185578 | No  |
| 7924 | HMDB0010341; CHEBI:32645             | Dextrorphan O-glucuronide                               | C23H31NO7 | 432.2032881 | No  |
| 7924 | HMDB0014826; C07908; CHEBI:8764      | Mycophenolate mofetil                                   | C23H31NO7 | 432.2032881 | No  |
| 7940 | HMDB0031347                          | 2-O-Caffeoylarbutin                                     | C21H22O10 | 433.1133144 | Yes |
| 7940 | HMDB0033739                          | Floribundoside                                          | C21H22O10 | 433.1133144 | Yes |
| 7940 | HMDB0037480                          | Eriodictin                                              | C21H22O10 | 433.1133144 | Yes |
| 7940 | HMDB0038775                          | 5,7,8-Trihydroxyflavanone 7-glucoside                   | C21H22O10 | 433.1133144 | Yes |
| 7940 | HMDB0039935                          | Dihydrogenistin                                         | C21H22O10 | 433.1133144 | Yes |
| 7940 | HMDB0040536                          | (2R,3R)-3,3'',4'',7-Tetrahydroxyflavanone 7-O-alpha-L-l | C21H22O10 | 433.1133144 | Yes |
| 7940 | HMDB0040832                          | 5-Hydroxyaloin A                                        | C21H22O10 | 433.1133144 | Yes |
| 7940 | HMDB0041150                          | 7-Hydroxyaloin B                                        | C21H22O10 | 433.1133144 | Yes |
| 7940 | HMDB0060772                          | 4''-Hydroxyfenoprofen glucuronide                       | C21H22O10 | 433.1133144 | Yes |
| 7940 | HMDB0124767                          | 5,7-dihydroxy-2-(4-hydroxyphenyl)-8-[3,4,5-trihydroxy   | C21H22O10 | 433.1133144 | Yes |
| 7940 | HMDB0128100                          | 6-[3,5-dihydroxy-2-(3-phenylpropanoyl)phenoxy]-3,4,5    | C21H22O10 | 433.1133144 | Yes |
| 7940 | HMDB0128101                          | 6-[3,5-dihydroxy-4-(3-phenylpropanoyl)phenoxy]-3,4,5    | C21H22O10 | 433.1133144 | Yes |
| 7940 | HMDB0130017                          | 6-[3,5-dihydroxy-2-(2-phenylpropanoyl)phenoxy]-3,4,5    | C21H22O10 | 433.1133144 | Yes |
| 7940 | HMDB0130018                          | 6-[3,5-dihydroxy-4-(2-phenylpropanoyl)phenoxy]-3,4,5    | C21H22O10 | 433.1133144 | Yes |
| 7940 | HMDB0134585                          | 3,4,5-trihydroxy-6-{3-hydroxy-5-[(E)-2-(3-hydroxy-4-m   | C21H22O10 | 433.1133144 | Yes |
| 7940 | HMDB0134586                          | 6-{5-[(E)-2-(3,5-dihydroxyphenyl)ethenyl]-2-methoxyp    | C21H22O10 | 433.1133144 | Yes |
| 7940 | HMDB0135129                          | 6-[3-(3,7-dihydroxy-3,4-dihydro-2H-1-benzopyran-2-yl)   | C21H22O10 | 433.1133144 | Yes |
| 7940 | HMDB0135130                          | 3,4,5-trihydroxy-6-[(3-hydroxy-2-(3-hydroxyphenyl)-3,   | C21H22O10 | 433.1133144 | Yes |
| 7940 | HMDB0135368                          | 3,4,5-trihydroxy-6-[4-hydroxy-2-(3-hydroxy-3-phenylpr   | C21H22O10 | 433.1133144 | Yes |
| 7940 | HMDB0135369                          | 3,4,5-trihydroxy-6-[4-hydroxy-3-(3-hydroxy-3-phenylpr   | C21H22O10 | 433.1133144 | Yes |
| 7940 | HMDB0135371                          | 6-[3-[3-(2,5-dihydroxyphenyl)-3-oxopropyl]phenoxy]-3    | C21H22O10 | 433.1133144 | Yes |
| 7940 | HMDB0135372                          | 3,4,5-trihydroxy-6-[4-hydroxy-2-[3-(3-hydroxyphenyl)p   | C21H22O10 | 433.1133144 | Yes |
| 7940 | HMDB0135373                          | 3,4,5-trihydroxy-6-[4-hydroxy-3-[3-(3-hydroxyphenyl)p   | C21H22O10 | 433.1133144 | Yes |
| 7940 | HMDB0135375                          | 6-[4-[3-(2,5-dihydroxyphenyl)-3-oxopropyl]phenoxy]-3    | C21H22O10 | 433.1133144 | Yes |
| 7940 | HMDB0135376                          | 3,4,5-trihydroxy-6-[4-hydroxy-2-[3-(4-hydroxyphenyl)p   | C21H22O10 | 433.1133144 | Yes |
| 7940 | HMDB0135377                          | 3,4,5-trihydroxy-6-[4-hydroxy-3-[3-(4-hydroxyphenyl)p   | C21H22O10 | 433.1133144 | Yes |
| 7940 | HMDB0135379                          | 6-[2-[3-(2,5-dihydroxyphenyl)-3-oxopropyl]phenoxy]-3    | C21H22O10 | 433.1133144 | Yes |
| 7940 | HMDB0135380                          | 3,4,5-trihydroxy-6-[4-hydroxy-2-[3-(2-hydroxyphenyl)p   | C21H22O10 | 433.1133144 | Yes |
| 7940 | HMDB0135381                          | 3,4,5-trihydroxy-6-[4-hydroxy-3-[3-(2-hydroxyphenyl)p   | C21H22O10 | 433.1133144 | Yes |
| 7940 | HMDB0135382                          | 6-[2,5-dihydroxy-4-(3-phenylpropanoyl)phenoxy]-3,4,5    | C21H22O10 | 433.1133144 | Yes |
| 7940 | HMDB0135383                          | 6-[4,5-dihydroxy-2-(3-phenylpropanoyl)phenoxy]-3,4,5    | C21H22O10 | 433.1133144 | Yes |
| 7940 | HMDB0135384                          | 6-[2,4-dihydroxy-5-(3-phenylpropanoyl)phenoxy]-3,4,5    | C21H22O10 | 433.1133144 | Yes |
| 7940 | HMDB0135386                          | 6-[2,5-dihydroxy-3-(3-phenylpropanoyl)phenoxy]-3,4,5    | C21H22O10 | 433.1133144 | Yes |
| 7940 | HMDB0135387                          | 6-[2,4-dihydroxy-6-(3-phenylpropanoyl)phenoxy]-3,4,5    | C21H22O10 | 433.1133144 | Yes |
| 7940 | HMDB0135388                          | 6-[3,4-dihydroxy-5-(3-phenylpropanoyl)phenoxy]-3,4,5    | C21H22O10 | 433.1133144 | Yes |
| 7940 | HMDB0135390                          | 6-[3,6-dihydroxy-2-(3-phenylpropanoyl)phenoxy]-3,4,5    | C21H22O10 | 433.1133144 | Yes |
| 7940 | HMDB0135391                          | 6-[3,4-dihydroxy-2-(3-phenylpropanoyl)phenoxy]-3,4,5    | C21H22O10 | 433.1133144 | Yes |
| 7940 | HMDB0135392                          | 6-[2,4-dihydroxy-3-(3-phenylpropanoyl)phenoxy]-3,4,5    | C21H22O10 | 433.1133144 | Yes |
| 7940 | HMDB0135418                          | 6-[2-[3-(3,4-dihydroxyphenyl)-3-oxopropyl]phenoxy]-3    | C21H22O10 | 433.1133144 | Yes |
| 7940 | HMDB0135419                          | 3,4,5-trihydroxy-6-[2-hydroxy-5-[3-(2-hydroxyphenyl)p   | C21H22O10 | 433.1133144 | Yes |
| 7940 | HMDB0135420                          | 3,4,5-trihydroxy-6-[2-hydroxy-4-[3-(2-hydroxyphenyl)p   | C21H22O10 | 433.1133144 | Yes |
| 7940 | HMDB0135423                          | 6-[2,3-dihydroxy-5-(3-phenylpropanoyl)phenoxy]-3,4,5    | C21H22O10 | 433.1133144 | Yes |
| 7940 | HMDB0135424                          | 6-[2,6-dihydroxy-4-(3-phenylpropanoyl)phenoxy]-3,4,5    | C21H22O10 | 433.1133144 | Yes |
| 7940 | HMDB0135428                          | 6-[2,6-dihydroxy-3-(3-phenylpropanoyl)phenoxy]-3,4,5    | C21H22O10 | 433.1133144 | Yes |



|      |                                  |                                                        |            |             |     |
|------|----------------------------------|--------------------------------------------------------|------------|-------------|-----|
| 7940 | HMDB0135429                      | 6-[2,3-dihydroxy-4-(3-phenylpropanoyl)phenoxy]-3,4,5   | C21H22O10  | 433.1133144 | Yes |
| 7940 | HMDB0135431                      | 3,4,5-trihydroxy-6-[2-hydroxy-5-(3-hydroxy-3-phenylpr  | C21H22O10  | 433.1133144 | Yes |
| 7940 | HMDB0135432                      | 3,4,5-trihydroxy-6-[2-hydroxy-4-(3-hydroxy-3-phenylpr  | C21H22O10  | 433.1133144 | Yes |
| 7940 | HMDB0135436                      | 6-{3-[3-(3,4-dihydroxyphenyl)-3-oxopropyl]phenoxy}-3   | C21H22O10  | 433.1133144 | Yes |
| 7940 | HMDB0135437                      | 3,4,5-trihydroxy-6-{2-hydroxy-5-[3-(3-hydroxyphenyl)]p | C21H22O10  | 433.1133144 | Yes |
| 7940 | HMDB0135442                      | 6-{4-[3-(3,4-dihydroxyphenyl)-3-oxopropyl]phenoxy}-3   | C21H22O10  | 433.1133144 | Yes |
| 7940 | HMDB0135443                      | 3,4,5-trihydroxy-6-{2-hydroxy-5-[3-(4-hydroxyphenyl)]p | C21H22O10  | 433.1133144 | Yes |
| 7940 | HMDB0135444                      | 3,4,5-trihydroxy-6-{2-hydroxy-4-[3-(4-hydroxyphenyl)]p | C21H22O10  | 433.1133144 | Yes |
| 7940 | HMDB0140590                      | 5-hydroxy-2-(4-hydroxyphenyl)-7-[[3,4,5-trihydroxy-6-  | C21H22O10  | 433.1133144 | Yes |
| 7940 | HMDB0141964                      | 2-[3,4-bis(2-hydroxyethoxy)phenyl]-3,5-dihydroxy-7-(2  | C21H22O10  | 433.1133144 | Yes |
| 7942 | HMDB0007852; C00416              | LPA(0:0/18:2(9Z,12Z))                                  | C21H39O7P  | 433.2359405 | Yes |
| 7942 | HMDB0007856; C00416; CHEBI:62834 | LPA(18:2(9Z,12Z)/0:0)                                  | C21H39O7P  | 433.2359405 | Yes |
| 7944 | HMDB0037183; CHEBI:53425         | Polysorbate 60                                         | C22H42O8   | 433.2804715 | No  |
| 7945 | HMDB0000359                      | 3a,7a-Dihydroxycoprostanic acid                        | C27H46O4   | 433.3326276 | No  |
| 7945 | HMDB0003533; C01301; CHEBI:16466 | 3a,7a,12a-Trihydroxy-5b-cholestan-26-al                | C27H46O4   | 433.3326276 | No  |
| 7945 | HMDB0062208; CHEBI:63848         | 3alpha,7alpha,24(5)-trihydroxy-5beta-cholestan-27-al   | C27H46O4   | 433.3326276 | No  |
| 7950 | HMDB0014323; CHEBI:9927          | Valsartan                                              | C24H29N5O3 | 434.2194424 | Yes |
| 7970 | HMDB0002195                      | Varanic acid                                           | C26H44O5   | 435.3106304 | No  |
| 7987 | HMDB0033469; CHEBI:85530         | N1,N10-Dicoumaroylspermidine                           | C25H31N3O4 | 436.2259158 | No  |
| 7989 | HMDB0011152                      | PE(P-16:0e/0:0)                                        | C21H44NO6P | 436.2829895 | No  |
| 8007 | HMDB0007850; C00416              | LPA(0:0/18:0)                                          | C21H43O7P  | 437.2675157 | No  |
| 8007 | HMDB0007854; C00416              | LPA(18:0/0:0)                                          | C21H43O7P  | 437.2675157 | No  |
| 8010 | HMDB0002126                      | 27-Nor-5b-cholestane-3a,7a,12a,24,25-pentol            | C26H46O5   | 437.3259823 | No  |
| 8036 | HMDB0039914                      | 1,6-Dihydroxy-3,7-dimethoxy-2-(3-methyl-2-butenyl)-8   | C25H28O7   | 439.1781181 | No  |
| 8036 | HMDB0039915                      | 1,6-Dihydroxy-3,7-dimethoxy-2-(2-hydroxy-3-methyl-3    | C25H28O7   | 439.1781181 | No  |
| 8036 | HMDB0039916                      | 1,6-Dihydroxy-3,7-dimethoxy-2-(3-methyl-2-butenyl)-8   | C25H28O7   | 439.1781181 | No  |
| 8036 | HMDB0039917                      | 1,3-Dihydroxy-6,7-dimethoxy-2-(2-hydroxy-3-methyl-3    | C25H28O7   | 439.1781181 | No  |
| 8042 | HMDB0013961                      | O-Desmethylverapamil (D-702)                           | C26H36N2O4 | 439.2599682 | No  |
| 8042 | HMDB0014246                      | O-Desmethylverapamil (D-703)                           | C26H36N2O4 | 439.2599682 | No  |
| 8042 | HMDB0060540; CHEBI:134080        | Norverapamil                                           | C26H36N2O4 | 439.2599682 | No  |
| 8046 | HMDB0029804                      | Momordol                                               | C26H48O5   | 439.3427167 | No  |
| 8047 | HMDB0011559                      | MG(0:0/24:1(15Z)/0:0)                                  | C27H52O4   | 439.3788601 | No  |
| 8047 | HMDB0011589                      | MG(24:1(15Z)/0:0/0:0)                                  | C27H52O4   | 439.3788601 | No  |
| 8076 | HMDB0034120; C10474              | Lusitanicoside                                         | C21H30O10  | 441.1770658 | Yes |
| 8100 | HMDB0060769                      | 4-Hydroxyphenytoin glucuronide                         | C21H20N2O9 | 443.1098449 | No  |
| 8102 | HMDB0011662; C04840; CHEBI:18134 | 3-beta-Hydroxy-4-beta-methyl-5-alpha-cholest-7-ene-4   | C29H48O3   | 443.3529933 | No  |
| 8102 | HMDB0012165                      | 4alpha-Carboxy-4beta-methyl-5alpha-cholesta-8-en-3ol   | C29H48O3   | 443.3529933 | No  |
| 8102 | HMDB0033633                      | (3beta,5alpha,6beta,22E,24R)-23-Methylergosta-7,22-    | C29H48O3   | 443.3529933 | No  |
| 8102 | HMDB0035804                      | Schleicherastatin 5                                    | C29H48O3   | 443.3529933 | No  |
| 8102 | HMDB0062384; CHEBI:87277         | 4?-carboxy-4?-methyl-5?-cholesta-8-en-3?-ol            | C29H48O3   | 443.3529933 | No  |
| 8145 | HMDB0030913                      | Cepagenin                                              | C27H42O5   | 445.2964406 | No  |
| 8145 | HMDB0031079                      | 12-Ketoporrigenin                                      | C27H42O5   | 445.2964406 | No  |
| 8145 | HMDB0032680                      | Neoporrigenin B                                        | C27H42O5   | 445.2964406 | No  |
| 8145 | HMDB0033583                      | Leontogenin                                            | C27H42O5   | 445.2964406 | No  |
| 8145 | HMDB0034189                      | Taccagenin                                             | C27H42O5   | 445.2964406 | No  |
| 8145 | HMDB0034424                      | Spirotaccagenin                                        | C27H42O5   | 445.2964406 | No  |
| 8145 | HMDB0060129; CHEBI:47813         | 24-Oxo-1alpha,23,25-trihydroxyvitamin D3               | C27H42O5   | 445.2964406 | No  |
| 8147 | HMDB0012557                      | 13"-Carboxy-gamma-tocopherol                           | C28H46O4   | 445.3316134 | No  |
| 8147 | HMDB0032107                      | (3beta,5alpha,6beta,7alpha,22E,24R)-Ergosta-8,22-die   | C28H46O4   | 445.3316134 | No  |
| 8147 | HMDB0032123                      | (3beta,5alpha,6alpha,9alpha,22E,24R)-Ergosta-7,22-die  | C28H46O4   | 445.3316134 | No  |
| 8147 | HMDB0032875                      | 3,5,9-Trihydroxyergost-7-en-6-one                      | C28H46O4   | 445.3316134 | No  |
| 8147 | HMDB0040999                      | Secasterone                                            | C28H46O4   | 445.3316134 | No  |
| 8147 | HMDB0041527                      | 3-Dehydroteasterone                                    | C28H46O4   | 445.3316134 | No  |
| 8148 | HMDB0012559; CHEBI:84962         | 13"-Hydroxy-alpha-tocopherol                           | C29H50O3   | 445.3682287 | No  |
| 8148 | HMDB0029607                      | Stigmastentriol                                        | C29H50O3   | 445.3682287 | No  |
| 8148 | HMDB0034408                      | alpha-Tocopherolquinone                                | C29H50O3   | 445.3682287 | No  |
| 8148 | HMDB0035512                      | Schleicherastatin 3                                    | C29H50O3   | 445.3682287 | No  |
| 8187 | HMDB0029209                      | naringenin-7-O-glucuronide                             | C21H20O11  | 447.0935747 | No  |
| 8187 | HMDB0030614; C10114; CHEBI:7781  | Orientin                                               | C21H20O11  | 447.0935747 | No  |
| 8187 | HMDB0030864                      | Trifolin                                               | C21H20O11  | 447.0935747 | No  |
| 8187 | HMDB0032903                      | 1,2,6,8-Tetrahydroxy-3-methylanthraquinone 2-O-b-D-    | C21H20O11  | 447.0935747 | No  |

|      |                                  |                                                          |           |             |     |
|------|----------------------------------|----------------------------------------------------------|-----------|-------------|-----|
| 8187 | HMDB0033751; C01750; CHEBI:17558 | Quercitrin                                               | C21H20O11 | 447.0935747 | No  |
| 8187 | HMDB0035588; C03951; CHEBI:27994 | Luteolin 7-glucoside                                     | C21H20O11 | 447.0935747 | No  |
| 8187 | HMDB0037359                      | Azaleatin 3-arabinoside                                  | C21H20O11 | 447.0935747 | No  |
| 8187 | HMDB0037377; C08598              | Carthamone                                               | C21H20O11 | 447.0935747 | No  |
| 8187 | HMDB0037429; C12249; CHEBI:30200 | Astragalin                                               | C21H20O11 | 447.0935747 | No  |
| 8187 | HMDB0037572                      | Kaempferol 5-glucoside                                   | C21H20O11 | 447.0935747 | No  |
| 8187 | HMDB0038467                      | Luteolin 7-galactoside                                   | C21H20O11 | 447.0935747 | No  |
| 8187 | HMDB0038468                      | Luteolin 4''-glucoside                                   | C21H20O11 | 447.0935747 | No  |
| 8187 | HMDB0041759                      | Naringenin 4''-O-glucuronide                             | C21H20O11 | 447.0935747 | No  |
| 8187 | HMDB0041760                      | Naringenin 5-O-glucuronide                               | C21H20O11 | 447.0935747 | No  |
| 8187 | HMDB0041761; CHEBI:132835        | Naringenin 7-O-glucuronide                               | C21H20O11 | 447.0935747 | No  |
| 8187 | HMDB0125404                      | 6-[(3,7-dihydroxy-4-oxo-2-phenyl-3,4-dihydro-2H-1-be     | C21H20O11 | 447.0935747 | No  |
| 8187 | HMDB0125405                      | 6-[(3,5-dihydroxy-4-oxo-2-phenyl-3,4-dihydro-2H-1-be     | C21H20O11 | 447.0935747 | No  |
| 8187 | HMDB0125410                      | 6-[3,5-dihydroxy-2-(2-oxo-3-phenylpropanoyl)phenoxy      | C21H20O11 | 447.0935747 | No  |
| 8187 | HMDB0125411                      | 6-[3,5-dihydroxy-4-(2-oxo-3-phenylpropanoyl)phenoxy      | C21H20O11 | 447.0935747 | No  |
| 8187 | HMDB0127132                      | 5,6,7-trihydroxy-2-(4-hydroxyphenyl)-8-[3,4,5-trihydro   | C21H20O11 | 447.0935747 | No  |
| 8187 | HMDB0127356                      | 2-(3,4-dihydroxyphenyl)-5,7-dihydroxy-6-[3,4,5-trihydro  | C21H20O11 | 447.0935747 | No  |
| 8187 | HMDB0127455                      | 3,5,7-trihydroxy-2-(4-{[3,4,5-trihydroxy-6-(hydroxymet   | C21H20O11 | 447.0935747 | No  |
| 8187 | HMDB0127468                      | 3,5-dihydroxy-2-(4-hydroxyphenyl)-7-{[3,4,5-trihydroxy   | C21H20O11 | 447.0935747 | No  |
| 8187 | HMDB0128082                      | 3,4,5-trihydroxy-6-{[7-hydroxy-2-(4-hydroxyphenyl)-4-    | C21H20O11 | 447.0935747 | No  |
| 8187 | HMDB0128083                      | 6-[4-(5,7-dihydroxy-4-oxo-3,4-dihydro-2H-1-benzopyra     | C21H20O11 | 447.0935747 | No  |
| 8187 | HMDB0128085                      | 6-[3,5-dihydroxy-2-[3-(4-hydroxyphenyl)prop-2-enoyl]     | C21H20O11 | 447.0935747 | No  |
| 8187 | HMDB0128086                      | 6-[3,5-dihydroxy-4-[3-(4-hydroxyphenyl)prop-2-enoyl]     | C21H20O11 | 447.0935747 | No  |
| 8187 | HMDB0128087                      | 3,4,5-trihydroxy-6-[4-[3-oxo-3-(2,4,6-trihydroxyphenyl   | C21H20O11 | 447.0935747 | No  |
| 8187 | HMDB0128104                      | 3,4,5-trihydroxy-6-[4-[(1E)-3-oxo-3-(2,4,6-trihydroxyph  | C21H20O11 | 447.0935747 | No  |
| 8187 | HMDB0128105                      | 6-[3,5-dihydroxy-2-[(2E)-3-(4-hydroxyphenyl)prop-2-er    | C21H20O11 | 447.0935747 | No  |
| 8187 | HMDB0129299                      | 5,6,7-trihydroxy-2-(3-hydroxyphenyl)-8-[3,4,5-trihydro   | C21H20O11 | 447.0935747 | No  |
| 8187 | HMDB0129977                      | 3,4,5-trihydroxy-6-{[7-hydroxy-3-(4-hydroxyphenyl)-4-    | C21H20O11 | 447.0935747 | No  |
| 8187 | HMDB0129978                      | 3,4,5-trihydroxy-6-{[5-hydroxy-3-(4-hydroxyphenyl)-4-    | C21H20O11 | 447.0935747 | No  |
| 8187 | HMDB0129979                      | 6-[4-(5,7-dihydroxy-4-oxo-3,4-dihydro-2H-1-benzopyra     | C21H20O11 | 447.0935747 | No  |
| 8187 | HMDB0130011                      | 6-[(5,7-dihydroxy-4-oxo-3-phenyl-3,4-dihydro-2H-1-be     | C21H20O11 | 447.0935747 | No  |
| 8187 | HMDB0130012                      | 6-[(6,7-dihydroxy-4-oxo-3-phenyl-3,4-dihydro-2H-1-be     | C21H20O11 | 447.0935747 | No  |
| 8187 | HMDB0130013                      | 6-[(5,6-dihydroxy-4-oxo-3-phenyl-3,4-dihydro-2H-1-be     | C21H20O11 | 447.0935747 | No  |
| 8187 | HMDB0130214                      | 6-[(7,8-dihydroxy-4-oxo-2-phenyl-3,4-dihydro-2H-1-be     | C21H20O11 | 447.0935747 | No  |
| 8187 | HMDB0130215                      | 6-[(5,8-dihydroxy-4-oxo-2-phenyl-3,4-dihydro-2H-1-be     | C21H20O11 | 447.0935747 | No  |
| 8187 | HMDB0130245                      | 3,4,5-trihydroxy-6-[3,4,5-trihydroxy-2-(3-phenylprop-2   | C21H20O11 | 447.0935747 | No  |
| 8187 | HMDB0130246                      | 3,4,5-trihydroxy-6-[2,3,5-trihydroxy-4-(3-phenylprop-2   | C21H20O11 | 447.0935747 | No  |
| 8187 | HMDB0130247                      | 3,4,5-trihydroxy-6-[2,4,6-trihydroxy-3-(3-phenylprop-2   | C21H20O11 | 447.0935747 | No  |
| 8187 | HMDB0130248                      | 3,4,5-trihydroxy-6-[2,3,5-trihydroxy-6-(3-phenylprop-2   | C21H20O11 | 447.0935747 | No  |
| 8187 | HMDB0132732                      | 3-{[3,4-dihydroxy-5-(hydroxymethyl)oxolan-2-yl]oxy}-5    | C21H20O11 | 447.0935747 | No  |
| 8187 | HMDB0133384                      | 3,4,5-trihydroxy-6-{[7-hydroxy-2-(3-hydroxyphenyl)-4-    | C21H20O11 | 447.0935747 | No  |
| 8187 | HMDB0133385                      | 3,4,5-trihydroxy-6-{[5-hydroxy-2-(3-hydroxyphenyl)-4-    | C21H20O11 | 447.0935747 | No  |
| 8187 | HMDB0133386                      | 6-[3-(5,7-dihydroxy-4-oxo-3,4-dihydro-2H-1-benzopyra     | C21H20O11 | 447.0935747 | No  |
| 8187 | HMDB0133578                      | 6-[(2-benzyl-2,6-dihydroxy-3-oxo-2,3-dihydro-1-benzo     | C21H20O11 | 447.0935747 | No  |
| 8187 | HMDB0133579                      | 6-[(2-benzyl-2,4-dihydroxy-3-oxo-2,3-dihydro-1-benzo     | C21H20O11 | 447.0935747 | No  |
| 8187 | HMDB0134576                      | 3,4,5-trihydroxy-6-{[8-hydroxy-2-(4-hydroxyphenyl)-4-    | C21H20O11 | 447.0935747 | No  |
| 8187 | HMDB0134577                      | 6-[4-(5,8-dihydroxy-4-oxo-3,4-dihydro-2H-1-benzopyra     | C21H20O11 | 447.0935747 | No  |
| 8187 | HMDB0134898                      | 6-[(6,7-dihydroxy-4-oxo-2-phenyl-3,4-dihydro-2H-1-be     | C21H20O11 | 447.0935747 | No  |
| 8187 | HMDB0134899                      | 6-[(5,7-dihydroxy-4-oxo-2-phenyl-3,4-dihydro-2H-1-be     | C21H20O11 | 447.0935747 | No  |
| 8187 | HMDB0134900                      | 6-[(5,6-dihydroxy-4-oxo-2-phenyl-3,4-dihydro-2H-1-be     | C21H20O11 | 447.0935747 | No  |
| 8187 | HMDB0134901                      | 3,4,5-trihydroxy-6-[2,3,5-trihydroxy-4-[(2E)-3-phenylpr  | C21H20O11 | 447.0935747 | No  |
| 8187 | HMDB0135149                      | 2-(3,4-dihydroxyphenyl)-5,7-dihydroxy-3-[(3,4,5-trihydro | C21H20O11 | 447.0935747 | No  |
| 8188 | HMDB0029481                      | Isosakuranin                                             | C22H24O10 | 447.1287678 | Yes |
| 8188 | HMDB0031586                      | 7-Hydroxy-8-O-methylaloin B                              | C22H24O10 | 447.1287678 | Yes |
| 8188 | HMDB0033741                      | Puddumin A                                               | C22H24O10 | 447.1287678 | Yes |
| 8188 | HMDB0037509                      | Chalconosakuranetin                                      | C22H24O10 | 447.1287678 | Yes |
| 8188 | HMDB0040561                      | Aromadendrin 4''-methyl ether 7-rhamnoside               | C22H24O10 | 447.1287678 | Yes |
| 8188 | HMDB0041536                      | Piperenol C                                              | C22H24O10 | 447.1287678 | Yes |
| 8192 | HMDB0029347                      | Acuminoside                                              | C21H36O10 | 447.2232686 | Yes |
| 8192 | HMDB0029348                      | Neryl arabinofuranosyl-glucoside                         | C21H36O10 | 447.2232686 | Yes |
| 8192 | HMDB0030421                      | L-Linalool 3-[xylosyl-(1->6)-glucoside]                  | C21H36O10 | 447.2232686 | Yes |

|      |                                   |                                                       |              |             |     |
|------|-----------------------------------|-------------------------------------------------------|--------------|-------------|-----|
| 8192 | HMDB0039573                       | Geranyl arabinopyranosyl-glucoside                    | C21H36O10    | 447.2232686 | Yes |
| 8192 | HMDB0039749                       | Kenposide B                                           | C21H36O10    | 447.2232686 | Yes |
| 8200 | HMDB0032783                       | Porrigenin A                                          | C27H44O5     | 447.3105116 | No  |
| 8200 | HMDB0034293                       | Asperagenin                                           | C27H44O5     | 447.3105116 | No  |
| 8201 | HMDB0034332                       | 6-Deoxodolichosterone                                 | C28H48O4     | 447.3470666 | No  |
| 8201 | HMDB0034423; C15793               | 2-Deoxycastasterone                                   | C28H48O4     | 447.3470666 | No  |
| 8203 | HMDB0030014                       | (3beta,5alpha,6beta,24R)-Stigmastane-3,5,6-triol      | C29H52O3     | 447.3838318 | No  |
| 8218 | HMDB0039900                       | Thesinine 4''-O-glucoside                             | C23H31NO8    | 448.1961224 | Yes |
| 8219 | HMDB0039857                       | Cadabicine methyl ether                               | C26H31N3O4   | 448.2247783 | Yes |
| 8227 | HMDB0000631; C05464; CHEBI:27471  | Deoxycholic acid glycine conjugate                    | C26H43NO5    | 448.3071816 | No  |
| 8227 | HMDB0000637; C05466               | Chenodeoxycholic acid glycine conjugate               | C26H43NO5    | 448.3071816 | No  |
| 8227 | HMDB0000708; CHEBI:542261         | Glycoursodeoxycholic acid                             | C26H43NO5    | 448.3071816 | No  |
| 8227 | HMDB0006898; C05462               | Chenodeoxyglycocholic acid                            | C26H43NO5    | 448.3071816 | No  |
| 8257 | HMDB0002385; CHEBI:63959          | Celastrol                                             | C29H38O4     | 449.268729  | No  |
| 8263 | HMDB0033984; C15802; CHEBI:20712  | 6-Deoxocastasterone                                   | C28H50O4     | 449.3624381 | No  |
| 8271 | HMDB0011474                       | LysoPE(0:0/16:1(9Z))                                  | C21H42NO7P   | 450.2623314 | No  |
| 8271 | HMDB0011504                       | LysoPE(16:1(9Z)/0:0)                                  | C21H42NO7P   | 450.2623314 | No  |
| 8271 | HMDB0035366                       | Cytochalasin Opho                                     | C28H37NO4    | 450.2623314 | No  |
| 8293 | HMDB0094682; CHEBI:133101         | 5alpha-Androstan-3alpha,17beta-diol disulfate         | C19H32O8S2   | 451.1469024 | Yes |
| 8297 | HMDB0015048; C07670; CHEBI:348669 | Repaglinide                                           | C27H36N2O4   | 451.2595026 | No  |
| 8301 | HMDB0000483                       | 5b-Cholestane-3a,7a,12a,23S,25-pentol                 | C27H48O5     | 451.342471  | No  |
| 8301 | HMDB0000513                       | 5b-Cholestane-3a,7a,12a,23R,25-pentol                 | C27H48O5     | 451.342471  | No  |
| 8301 | HMDB0000556                       | 5b-Cholestane-3a,7a,12a,24,25-pentol                  | C27H48O5     | 451.342471  | No  |
| 8301 | HMDB0000558                       | 5a-Cholestane-3a,7a,12a,23,25-pentol                  | C27H48O5     | 451.342471  | No  |
| 8301 | HMDB0002180                       | 5b-Cholestane-3a,7a,12a,25,26-pentol                  | C27H48O5     | 451.342471  | No  |
| 8301 | HMDB0002208                       | Cholestane-3,7,12,24,25-pentol                        | C27H48O5     | 451.342471  | No  |
| 8301 | HMDB0062416; CHEBI:63835          | 5beta-cholestan-3alpha,7alpha,12alpha,24(S),27-pentol | C27H48O5     | 451.342471  | No  |
| 8301 | HMDB0062421                       | 5beta-cholestane-3alpha,7alpha,12alpha,23,25-pentol   | C27H48O5     | 451.342471  | No  |
| 8307 | HMDB0060858                       | o-O-sulfate rosiglitazone                             | C18H19N3O7S2 | 452.0613935 | No  |
| 8309 | HMDB0031948                       | 1-Isobutanol                                          | C21H27NO10   | 452.1557936 | No  |
| 8309 | HMDB0061140                       | Endoxifen sulfate                                     | C25H27NO5S   | 452.1557936 | No  |
| 8313 | HMDB0011473; CHEBI:131743         | LysoPE(0:0/16:0)                                      | C21H44NO7P   | 452.2755518 | No  |
| 8313 | HMDB0011503; CHEBI:73004          | LysoPE(16:0/0:0)                                      | C21H44NO7P   | 452.2755518 | No  |
| 8344 | HMDB0002157                       | 27-Norcholestanhexol                                  | C26H46O6     | 453.3227965 | No  |
| 8380 | HMDB0036883                       | Citranaxanthin                                        | C33H44O      | 455.3310842 | No  |
| 8381 | HMDB0002364; C17148; CHEBI:37659  | Oleanolic acid                                        | C30H48O3     | 455.3504322 | No  |
| 8381 | HMDB0002388; CHEBI:499685         | Boswellic acid                                        | C30H48O3     | 455.3504322 | No  |
| 8381 | HMDB0002395; C08988; CHEBI:9908   | Ursolic acid                                          | C30H48O3     | 455.3504322 | No  |
| 8381 | HMDB0030094; C08619               | Betulinic acid                                        | C30H48O3     | 455.3504322 | No  |
| 8381 | HMDB0031882                       | Sandosapogenol                                        | C30H48O3     | 455.3504322 | No  |
| 8381 | HMDB0032256                       | (+)-Ethyl 3-hydroxy-2-methylbutyrate                  | C30H48O3     | 455.3504322 | No  |
| 8381 | HMDB0033020                       | Ganodermanondiol                                      | C30H48O3     | 455.3504322 | No  |
| 8381 | HMDB0034652; C17420               | Soyasapogenol E                                       | C30H48O3     | 455.3504322 | No  |
| 8381 | HMDB0034654                       | Katonic acid                                          | C30H48O3     | 455.3504322 | No  |
| 8381 | HMDB0034655                       | 3-Epikatonic acid                                     | C30H48O3     | 455.3504322 | No  |
| 8381 | HMDB0034961                       | beta-Elemolic acid                                    | C30H48O3     | 455.3504322 | No  |
| 8381 | HMDB0034962                       | 3alpha-3-Hydroxytirucalla-7,24-dien-21-oic acid       | C30H48O3     | 455.3504322 | No  |
| 8381 | HMDB0034964; C08623               | alpha-Elemolic acid                                   | C30H48O3     | 455.3504322 | No  |
| 8381 | HMDB0035119                       | Isomangiferolic acid                                  | C30H48O3     | 455.3504322 | No  |
| 8381 | HMDB0035263                       | Oxyallobetulin                                        | C30H48O3     | 455.3504322 | No  |
| 8381 | HMDB0035315                       | Ganodermatrionol                                      | C30H48O3     | 455.3504322 | No  |
| 8381 | HMDB0035353                       | Epoxyanoderiol C                                      | C30H48O3     | 455.3504322 | No  |
| 8381 | HMDB0035511                       | Trametenolic acid B                                   | C30H48O3     | 455.3504322 | No  |
| 8381 | HMDB0035775                       | 11-Deoxoglycyrrhetinic acid                           | C30H48O3     | 455.3504322 | No  |
| 8381 | HMDB0036675                       | 3beta-Hydroxy-28,13-ursanolide                        | C30H48O3     | 455.3504322 | No  |
| 8381 | HMDB0036757                       | Bryonolic acid                                        | C30H48O3     | 455.3504322 | No  |
| 8381 | HMDB0036962                       | 3-Epioleanolic acid                                   | C30H48O3     | 455.3504322 | No  |
| 8381 | HMDB0038177                       | 3-Hydroxycycloart-24-en-21-oic acid                   | C30H48O3     | 455.3504322 | No  |
| 8381 | HMDB0038703; CHEBI:95136          | Carissic acid                                         | C30H48O3     | 455.3504322 | No  |
| 8381 | HMDB0039690                       | Glycyrrhetol                                          | C30H48O3     | 455.3504322 | No  |
| 8381 | HMDB0040455                       | Lucidadiol                                            | C30H48O3     | 455.3504322 | No  |

|      |                                  |                                                           |             |             |     |
|------|----------------------------------|-----------------------------------------------------------|-------------|-------------|-----|
| 8381 | HMDB0040456                      | Ganoderic acid Z                                          | C30H48O3    | 455.3504322 | No  |
| 8381 | HMDB0040652                      | 3-Hydroxy-28,13-lupanolide                                | C30H48O3    | 455.3504322 | No  |
| 8381 | HMDB0040976                      | 3-Epimasticadienolic acid                                 | C30H48O3    | 455.3504322 | No  |
| 8410 | HMDB0033728                      | Pubesenolide                                              | C28H42O5    | 457.2950862 | No  |
| 8442 | HMDB0033138                      | Methyl salicylate O-[rhamnosyl-(1->6)-glucoside]          | C20H28O12   | 459.1510312 | No  |
| 8445 | HMDB0030909                      | 2,3-Secoporrigenin                                        | C27H40O6    | 459.2731869 | No  |
| 8445 | HMDB0038352                      | Lucidenic acid N                                          | C27H40O6    | 459.2731869 | No  |
| 8449 | HMDB0032879                      | all-trans-Carophyll yellow                                | C32H44O2    | 459.3265787 | No  |
| 8465 | HMDB0015194; C06839; CHEBI:2956  | Azlocillin                                                | C20H23N5O6S | 460.1287946 | No  |
| 8467 | HMDB0060934                      | 3-cis-Hydroxyglipizide                                    | C21H27N5O5S | 460.1662402 | No  |
| 8467 | HMDB0060935                      | 4-trans-Hydroxyglipizide                                  | C21H27N5O5S | 460.1662402 | No  |
| 8501 | HMDB0034430                      | 6-Deoxohomodolichosterone                                 | C29H50O4    | 461.3620339 | No  |
| 8501 | HMDB0039713                      | (3beta,22R,23R,24S)-3,22,23-Trihydroxystigmastan-6-ol     | C29H50O4    | 461.3620339 | No  |
| 8512 | HMDB0060820                      | Dihydroisomorphine-3-glucuronide                          | C23H29NO9   | 462.1768537 | No  |
| 8512 | HMDB0060821                      | Dihydromorphine-3-glucuronide                             | C23H29NO9   | 462.1768537 | No  |
| 8512 | HMDB0060916                      | Etodolac acyl glucuronide                                 | C23H29NO9   | 462.1768537 | No  |
| 8512 | HMDB0061137                      | Dihydroisomorphine-6-glucuronide                          | C23H29NO9   | 462.1768537 | No  |
| 8530 | HMDB0030901                      | Eremopetasitenin B2                                       | C24H32O7S   | 463.1800416 | Yes |
| 8530 | HMDB0041532                      | Eremosulphoxinolide A                                     | C24H32O7S   | 463.1800416 | Yes |
| 8531 | HMDB0006766; C05504              | Estriol-16-Glucuronide                                    | C24H32O9    | 463.1988035 | Yes |
| 8531 | HMDB0010333                      | Estriol-17-glucuronide                                    | C24H32O9    | 463.1988035 | Yes |
| 8531 | HMDB0010335                      | Estriol-3-glucuronide                                     | C24H32O9    | 463.1988035 | Yes |
| 8531 | HMDB0010353; C03033              | 15-Hydroxynorandrostene-3,17-dione glucuronide            | C24H32O9    | 463.1988035 | Yes |
| 8531 | HMDB0010354; C11346              | 16-alpha,17-beta-estriol 17-beta-D-glucuronide            | C24H32O9    | 463.1988035 | Yes |
| 8532 | HMDB0031367                      | Linalool oxide D 3-[apiosyl-(1->6)-glucoside]             | C21H36O11   | 463.2178953 | No  |
| 8532 | HMDB0035489                      | Linalool 3,6-oxide primeveroside                          | C21H36O11   | 463.2178953 | No  |
| 8532 | HMDB0036571                      | Linalool 3,7-oxide beta-primeveroside                     | C21H36O11   | 463.2178953 | No  |
| 8535 | HMDB0003193; C11134; CHEBI:28835 | Testosterone glucuronide                                  | C25H36O8    | 463.2340072 | Yes |
| 8535 | HMDB0010327; C03033              | Dehydroisoandrosterone 3-glucuronide                      | C25H36O8    | 463.2340072 | Yes |
| 8535 | HMDB0010348; CHEBI:68834         | Dehydroepiandrosterone 3-glucuronide                      | C25H36O8    | 463.2340072 | Yes |
| 8535 | HMDB0029655                      | Erinacine G                                               | C25H36O8    | 463.2340072 | Yes |
| 8546 | HMDB0002163; CHEBI:89753         | Trihydroxycoprostanic acid                                | C28H48O5    | 463.3431772 | No  |
| 8546 | HMDB0041135                      | 2-Deoxybrassinolide                                       | C28H48O5    | 463.3431772 | No  |
| 8557 | HMDB0003323                      | Biotripyrrin-a                                            | C25H27N3O6  | 464.1830771 | Yes |
| 8557 | HMDB0003324                      | Biotripyrrin-b                                            | C25H27N3O6  | 464.1830771 | Yes |
| 8566 | HMDB0010380; C04230              | LysoPC(14:1(9Z))                                          | C22H44NO7P  | 464.2776864 | No  |
| 8568 | HMDB0000138; C01921; CHEBI:29746 | Glycocholic acid                                          | C26H43NO6   | 464.3020993 | Yes |
| 8568 | HMDB0000331                      | 3a,7b,12a-Trihydroxyoxocholanyl-Glycine                   | C26H43NO6   | 464.3020993 | Yes |
| 8568 | HMDB0032596; CHEBI:36273         | Sodium glycocholate                                       | C26H43NO6   | 464.3020993 | Yes |
| 8588 | HMDB0036600; C09738              | T2 Toxin                                                  | C24H34O9    | 465.2120973 | Yes |
| 8588 | HMDB0038558                      | 8-Pentanoylneosolaniol                                    | C24H34O9    | 465.2120973 | Yes |
| 8590 | HMDB0001054; C01246; CHEBI:15812 | Dolichyl b-D-glucosyl phosphate                           | C21H39O9P   | 465.2238973 | Yes |
| 8593 | HMDB0002829; C11135; CHEBI:28832 | Androsterone glucuronide                                  | C25H38O8    | 465.2500602 | No  |
| 8593 | HMDB0004484; C11136; CHEBI:37451 | Etiocolanone glucuronide                                  | C25H38O8    | 465.2500602 | No  |
| 8593 | HMDB0006203; CHEBI:89417         | 5-alpha-Dihydrotestosterone glucuronide                   | C25H38O8    | 465.2500602 | No  |
| 8593 | HMDB0010365                      | 3-alpha-hydroxy-5-alpha-androstane-17-one 3-D-glucuronide | C25H38O8    | 465.2500602 | No  |
| 8608 | HMDB0031949                      | Bis-N-butyl phthalate                                     | C22H29NO10  | 466.1718498 | No  |
| 8613 | HMDB0042042                      | Tiropamide                                                | C28H41N3O3  | 466.3077374 | No  |
| 8635 | HMDB0010321                      | 3,17-Androstenediol glucuronide                           | C25H40O8    | 467.2639628 | Yes |
| 8635 | HMDB0010339                      | 3-alpha-Androstenediol glucuronide                        | C25H40O8    | 467.2639628 | Yes |
| 8635 | HMDB0010359                      | 17-Hydroxyandrostane-3-glucuronide                        | C25H40O8    | 467.2639628 | Yes |
| 8639 | HMDB0035806                      | psi-Taraxasteryl acetate                                  | C32H52O2    | 467.3901914 | No  |
| 8639 | HMDB0036658                      | alpha-Amyrin acetate                                      | C32H52O2    | 467.3901914 | No  |
| 8639 | HMDB0036960                      | Urs-13(18)-en-3beta-yl acetate                            | C32H52O2    | 467.3901914 | No  |
| 8639 | HMDB0038062                      | Isomultiflorenyl acetate                                  | C32H52O2    | 467.3901914 | No  |
| 8639 | HMDB0040516                      | Bauerenyl acetate                                         | C32H52O2    | 467.3901914 | No  |
| 8675 | HMDB0003850; C04549; CHEBI:17283 | 1-Phosphatidyl-1D-myo-inositol 3-phosphate                | C11H20O16P2 | 469.0135709 | Yes |
| 8676 | HMDB0037073                      | (E)-Resveratrol 3-glucoside 4''-sulfate                   | C20H22O11S  | 469.078571  | No  |
| 8676 | HMDB0037074                      | (Z)-Resveratrol 3-glucoside 5-sulfate                     | C20H22O11S  | 469.078571  | No  |
| 8676 | HMDB0037075                      | (Z)-Resveratrol 3-(2''''-sulfoglucoside)                  | C20H22O11S  | 469.078571  | No  |
| 8676 | HMDB0037076                      | (Z)-Resveratrol 3-(4''''-sulfoglucoside)                  | C20H22O11S  | 469.078571  | No  |

|      |                                  |                                                                 |               |             |     |
|------|----------------------------------|-----------------------------------------------------------------|---------------|-------------|-----|
| 8676 | HMDB0037077                      | (Z)-Resveratrol 3-(6'''-sulfoglucopyranoside)                   | C20H22O11S    | 469.078571  | No  |
| 8676 | HMDB0037078                      | (Z)-Resveratrol 3-(3'''-sulfoglucoside)                         | C20H22O11S    | 469.078571  | No  |
| 8676 | HMDB0128509                      | {4-[(E)-2-(3-hydroxy-5-[[3,4,5-trihydroxy-6-(hydroxyme          | C20H22O11S    | 469.078571  | No  |
| 8680 | HMDB0029340                      | Ceanothine C                                                    | C26H38N4O4    | 469.2808253 | No  |
| 8725 | HMDB0001534; C00664; CHEBI:15639 | 5-Formiminotetrahydrofolic acid                                 | C20H24N8O6    | 471.1734629 | Yes |
| 8725 | HMDB0039741                      | alpha-L-Rhamnopyranosyl-(1->3)-alpha-D-galactopyrar             | C18H32O14     | 471.1734629 | Yes |
| 8725 | HMDB0127459                      | 6-[[{4,5-dihydroxy-6-methyl-3-[[{3,4,5-trihydroxy-6-met         | C18H32O14     | 471.1734629 | Yes |
| 8752 | HMDB0030004                      | Austalide B                                                     | C26H34O8      | 473.2172048 | No  |
| 8764 | HMDB0034505; C17419              | Soyasapogenol A                                                 | C30H50O4      | 473.3628355 | No  |
| 8764 | HMDB0034528                      | Camelliagenin A                                                 | C30H50O4      | 473.3628355 | No  |
| 8764 | HMDB0034644                      | Priverogenin B                                                  | C30H50O4      | 473.3628355 | No  |
| 8764 | HMDB0034683                      | (3alphaOH,20S,24S)-3,19:20,24-Diepoxydammarane-3                | C30H50O4      | 473.3628355 | No  |
| 8764 | HMDB0035326                      | Ganoderiol A                                                    | C30H50O4      | 473.3628355 | No  |
| 8764 | HMDB0039692                      | 20,24-Epoxy-25,26-dihydroxydammaran-3-one                       | C30H50O4      | 473.3628355 | No  |
| 8772 | HMDB0033511                      | Protogonyautoxin I                                              | C10H17N7O11S2 | 474.0349255 | No  |
| 8776 | HMDB0060464; C16577              | Codeine-6-glucuronide                                           | C24H29NO9     | 474.1774241 | Yes |
| 8779 | HMDB0011478                      | LysoPE(0:0/18:3(6Z,9Z,12Z))                                     | C23H42NO7P    | 474.2609982 | No  |
| 8779 | HMDB0011479                      | LysoPE(0:0/18:3(9Z,12Z,15Z))                                    | C23H42NO7P    | 474.2609982 | No  |
| 8779 | HMDB0011508                      | LysoPE(18:3(6Z,9Z,12Z)/0:0)                                     | C23H42NO7P    | 474.2609982 | No  |
| 8779 | HMDB0011509                      | LysoPE(18:3(9Z,12Z,15Z)/0:0)                                    | C23H42NO7P    | 474.2609982 | No  |
| 8782 | HMDB0014907; CHEBI:50851         | Hydrocortamate                                                  | C27H41NO6     | 474.2864357 | No  |
| 8796 | HMDB0037452                      | Diosmetin 7-O-beta-D-glucuronopyranoside                        | C22H20O12     | 475.0870165 | Yes |
| 8796 | HMDB0124901                      | 3,4,5-trihydroxy-6-[[5-hydroxy-2-(3-hydroxy-5-methox            | C22H20O12     | 475.0870165 | Yes |
| 8796 | HMDB0124902                      | 3,4,5-trihydroxy-6-[[7-hydroxy-2-(3-hydroxy-5-methox            | C22H20O12     | 475.0870165 | Yes |
| 8796 | HMDB0124903                      | 6-[3-(5,7-dihydroxy-4-oxo-4H-chromen-2-yl)-5-methox             | C22H20O12     | 475.0870165 | Yes |
| 8796 | HMDB0126583                      | 6-[[3,5-dihydroxy-2-(3-methoxyphenyl)-4-oxo-4H-chro             | C22H20O12     | 475.0870165 | Yes |
| 8796 | HMDB0126584                      | 6-[[3,7-dihydroxy-2-(3-methoxyphenyl)-4-oxo-4H-chro             | C22H20O12     | 475.0870165 | Yes |
| 8796 | HMDB0126585                      | 6-[[5,7-dihydroxy-2-(3-methoxyphenyl)-4-oxo-4H-chro             | C22H20O12     | 475.0870165 | Yes |
| 8796 | HMDB0127503                      | 6-[[3,5-dihydroxy-2-(4-methoxyphenyl)-4-oxo-4H-chro             | C22H20O12     | 475.0870165 | Yes |
| 8796 | HMDB0127504                      | 6-[[3,7-dihydroxy-2-(4-methoxyphenyl)-4-oxo-4H-chro             | C22H20O12     | 475.0870165 | Yes |
| 8796 | HMDB0127505                      | 6-[[5,7-dihydroxy-2-(4-methoxyphenyl)-4-oxo-4H-chro             | C22H20O12     | 475.0870165 | Yes |
| 8796 | HMDB0128594                      | 3,4,5-trihydroxy-6-[[5-hydroxy-2-(4-hydroxyphenyl)-6-           | C22H20O12     | 475.0870165 | Yes |
| 8796 | HMDB0128595                      | 3,4,5-trihydroxy-6-[[7-hydroxy-2-(4-hydroxyphenyl)-6-           | C22H20O12     | 475.0870165 | Yes |
| 8796 | HMDB0128596                      | 6-[4-(5,7-dihydroxy-6-methoxy-4-oxo-4H-chromen-2-y              | C22H20O12     | 475.0870165 | Yes |
| 8796 | HMDB0128603                      | 3,4,5-trihydroxy-6-[[6-hydroxy-2-(4-hydroxyphenyl)-5-           | C22H20O12     | 475.0870165 | Yes |
| 8796 | HMDB0128604                      | 3,4,5-trihydroxy-6-[[7-hydroxy-2-(4-hydroxyphenyl)-5-           | C22H20O12     | 475.0870165 | Yes |
| 8796 | HMDB0128605                      | 6-[4-(6,7-dihydroxy-5-methoxy-4-oxo-4H-chromen-2-y              | C22H20O12     | 475.0870165 | Yes |
| 8796 | HMDB0129969                      | 6-[[5,6-dihydroxy-3-(4-methoxyphenyl)-4-oxo-4H-chro             | C22H20O12     | 475.0870165 | Yes |
| 8796 | HMDB0130184                      | 6-[[7,8-dihydroxy-2-(4-methoxyphenyl)-4-oxo-4H-chro             | C22H20O12     | 475.0870165 | Yes |
| 8796 | HMDB0130185                      | 6-[[5,8-dihydroxy-2-(4-methoxyphenyl)-4-oxo-4H-chro             | C22H20O12     | 475.0870165 | Yes |
| 8796 | HMDB0133322                      | 3,4,5-trihydroxy-6-[[7-hydroxy-2-(3-hydroxy-4-methox            | C22H20O12     | 475.0870165 | Yes |
| 8796 | HMDB0133323                      | 3,4,5-trihydroxy-6-[[6-hydroxy-2-(3-hydroxy-4-methox            | C22H20O12     | 475.0870165 | Yes |
| 8796 | HMDB0133324                      | 6-[5-(6,7-dihydroxy-4-oxo-4H-chromen-2-yl)-2-methox             | C22H20O12     | 475.0870165 | Yes |
| 8796 | HMDB0133331                      | 3,4,5-trihydroxy-6-[2-hydroxy-6-(7-hydroxy-4-oxo-4H- $\epsilon$ | C22H20O12     | 475.0870165 | Yes |
| 8796 | HMDB0133332                      | 6-[[2-(2,3-dihydroxy-4-methoxyphenyl)-4-oxo-4H-chro             | C22H20O12     | 475.0870165 | Yes |
| 8796 | HMDB0133333                      | 3,4,5-trihydroxy-6-[2-hydroxy-3-(7-hydroxy-4-oxo-4H- $\epsilon$ | C22H20O12     | 475.0870165 | Yes |
| 8796 | HMDB0133336                      | 3,4,5-trihydroxy-6-[4-hydroxy-2-(7-hydroxy-4-oxo-4H- $\epsilon$ | C22H20O12     | 475.0870165 | Yes |
| 8796 | HMDB0133337                      | 6-[[2-(2,5-dihydroxy-4-methoxyphenyl)-4-oxo-4H-chro             | C22H20O12     | 475.0870165 | Yes |
| 8796 | HMDB0133338                      | 3,4,5-trihydroxy-6-[4-hydroxy-5-(7-hydroxy-4-oxo-4H- $\epsilon$ | C22H20O12     | 475.0870165 | Yes |
| 8796 | HMDB0133339                      | 3,4,5-trihydroxy-6-[[7-hydroxy-2-(3-hydroxy-4-methox            | C22H20O12     | 475.0870165 | Yes |
| 8796 | HMDB0133340                      | 6-[5-(5,7-dihydroxy-4-oxo-4H-chromen-2-yl)-2-methox             | C22H20O12     | 475.0870165 | Yes |
| 8796 | HMDB0133831                      | 6-[3-(3,5-dihydroxy-7-methoxy-4-oxo-4H-chromen-2-y              | C22H20O12     | 475.0870165 | Yes |
| 8796 | HMDB0133832                      | 3,4,5-trihydroxy-6-[[5-hydroxy-2-(3-hydroxyphenyl)-7-           | C22H20O12     | 475.0870165 | Yes |
| 8796 | HMDB0133833                      | 3,4,5-trihydroxy-6-[[3-hydroxy-2-(3-hydroxyphenyl)-7-           | C22H20O12     | 475.0870165 | Yes |
| 8796 | HMDB0137318                      | 3,4,5-trihydroxy-6-[[5-hydroxy-2-(2-hydroxyphenyl)-6-           | C22H20O12     | 475.0870165 | Yes |
| 8799 | HMDB0003141; C11061; CHEBI:28870 | Retinoyl b-glucuronide                                          | C26H36O8      | 475.2331566 | No  |
| 8799 | HMDB0030153                      | Austalide H                                                     | C26H36O8      | 475.2331566 | No  |
| 8799 | HMDB0062632                      | 1-O-all-trans-retinoyl-beta-glucuronic Acid                     | C26H36O8      | 475.2331566 | No  |
| 8803 | HMDB0038496                      | Polyporusterone B                                               | C28H44O6      | 475.3046666 | No  |
| 8803 | HMDB0038497                      | Polyporusterone C                                               | C28H44O6      | 475.3046666 | No  |
| 8807 | HMDB0038244                      | Panaxatriol                                                     | C30H52O4      | 475.3785157 | No  |

|      |                                   |                                                                                                                                      |             |             |     |
|------|-----------------------------------|--------------------------------------------------------------------------------------------------------------------------------------|-------------|-------------|-----|
| 8881 | HMDB0010381; C04230; CHEBI:580912 | LysoPC(15:0)                                                                                                                         | C23H48NO7P  | 480.3086309 | No  |
| 8881 | HMDB0011129; CHEBI:133144         | LysoPE(0:0/18:0)                                                                                                                     | C23H48NO7P  | 480.3086309 | No  |
| 8881 | HMDB0011130; CHEBI:75036          | LysoPE(18:0/0:0)                                                                                                                     | C23H48NO7P  | 480.3086309 | No  |
| 8904 | HMDB0010351                       | 11-beta-Hydroxyandrosterone-3-glucuronide                                                                                            | C25H38O9    | 481.2442329 | Yes |
| 8940 | HMDB0038539                       | Goshonoside F1                                                                                                                       | C26H44O8    | 483.2940052 | No  |
| 8940 | HMDB0038540                       | Goshonoside F2                                                                                                                       | C26H44O8    | 483.2940052 | No  |
| 8970 | HMDB0000585; CHEBI:89573          | Glucosylgalactosyl hydroxylysine                                                                                                     | C18H34N2O13 | 485.1989447 | Yes |
| 8976 | HMDB0011156                       | PA(20:4(5Z,8Z,11Z,14Z)e/2:0)                                                                                                         | C25H43O7P   | 485.2678343 | No  |
| 8976 | HMDB0062310                       | 1-(7Z,10Z,13Z,16Z-docosatetraenoyl)-glycero-3-phospholipid                                                                           | C25H43O7P   | 485.2678343 | No  |
| 8976 | HMDB0114752                       | LPA(22:4(7Z,10Z,13Z,16Z)/0:0)                                                                                                        | C25H43O7P   | 485.2678343 | No  |
| 9005 | HMDB0034036                       | Pitheduloside I                                                                                                                      | C30H48O5    | 487.3434494 | No  |
| 9005 | HMDB0034502                       | Arjunolic acid                                                                                                                       | C30H48O5    | 487.3434494 | No  |
| 9005 | HMDB0034531                       | Camelliagenin B                                                                                                                      | C30H48O5    | 487.3434494 | No  |
| 9005 | HMDB0035118                       | Madasiatic acid                                                                                                                      | C30H48O5    | 487.3434494 | No  |
| 9005 | HMDB0035782                       | Esculentic acid (Diplazium)                                                                                                          | C30H48O5    | 487.3434494 | No  |
| 9005 | HMDB0035957                       | Hovenolactone                                                                                                                        | C30H48O5    | 487.3434494 | No  |
| 9005 | HMDB0036311                       | Centellasapogenol A                                                                                                                  | C30H48O5    | 487.3434494 | No  |
| 9005 | HMDB0036639                       | Glyunnansapogenin B                                                                                                                  | C30H48O5    | 487.3434494 | No  |
| 9005 | HMDB0036651; CHEBI:67914          | Euscaphic acid                                                                                                                       | C30H48O5    | 487.3434494 | No  |
| 9005 | HMDB0036961                       | (3beta,6alpha,19alpha)-3,6,19-Trihydroxy-12-ursen-28-one                                                                             | C30H48O5    | 487.3434494 | No  |
| 9005 | HMDB0037782                       | Ganoderiol D                                                                                                                         | C30H48O5    | 487.3434494 | No  |
| 9005 | HMDB0038116; C12599               | Ananasic acid                                                                                                                        | C30H48O5    | 487.3434494 | No  |
| 9005 | HMDB0040391                       | 16beta-Hydroxystellatogenin                                                                                                          | C30H48O5    | 487.3434494 | No  |
| 9005 | HMDB0041039                       | 21beta-Hydroxyhederagenin                                                                                                            | C30H48O5    | 487.3434494 | No  |
| 9011 | HMDB0060763                       | 4-Hydroxy duloxetine glucuronide                                                                                                     | C24H27NO8S  | 488.1383843 | No  |
| 9034 | HMDB0128306                       | 3-[3,4-dihydroxy-5-(3,4,5-trihydroxybenzoyloxy)benzoate]-6-phosphatidyl-L-serine                                                     | C21H14O14   | 489.0301876 | No  |
| 9034 | HMDB0128307                       | 3,4-dihydroxy-5-[2,4,5-trihydroxy-3-(3,4,5-trihydroxybenzoyloxy)benzoate]-6-phosphatidyl-L-serine                                    | C21H14O14   | 489.0301876 | No  |
| 9034 | HMDB0128308                       | 3-[3,4-dihydroxy-5-(2,3,4,5-tetrahydroxybenzoyloxy)benzoate]-6-phosphatidyl-L-serine                                                 | C21H14O14   | 489.0301876 | No  |
| 9036 | HMDB0040512                       | 4'',5,6-Trimethylscutellarein 7-glucoside                                                                                            | C24H26O11   | 489.1402969 | No  |
| 9037 | HMDB0034434                       | Austalide F                                                                                                                          | C26H34O9    | 489.2126348 | Yes |
| 9037 | HMDB0035073                       | Deacetylnomilinic acid                                                                                                               | C26H34O9    | 489.2126348 | Yes |
| 9037 | HMDB0039120                       | alpha-Crocetin glucosyl ester                                                                                                        | C26H34O9    | 489.2126348 | Yes |
| 9037 | HMDB0060122                       | 4-Oxo-9-cis-retinoyl-beta-glucuronide                                                                                                | C26H34O9    | 489.2126348 | Yes |
| 9037 | HMDB0061687                       | Estradiol acetate glucuronide                                                                                                        | C26H34O9    | 489.2126348 | Yes |
| 9037 | HMDB0061689                       | 4-Ketoretinoic acid glucuronide                                                                                                      | C26H34O9    | 489.2126348 | Yes |
| 9039 | HMDB0060118                       | 12-Hydroxy-13-O-D-glucuronoside-octadec-9Z-enoate                                                                                    | C24H42O10   | 489.2708149 | No  |
| 9039 | HMDB0060119                       | 12-O-D-Glucuronoside-13-hydroxyoctadec-9Z-enoate                                                                                     | C24H42O10   | 489.2708149 | No  |
| 9039 | HMDB0060120                       | 10-Hydroxy-octadec-12Z-enoate-9-beta-D-glucuronide                                                                                   | C24H42O10   | 489.2708149 | No  |
| 9039 | HMDB0060121                       | 9-Hydroxy-10-O-D-glucuronoside-12Z-octadecenoate                                                                                     | C24H42O10   | 489.2708149 | No  |
| 9041 | HMDB0062306                       | 1-(13Z,16Z-docosadienoyl)-glycero-3-phosphate                                                                                        | C25H47O7P   | 489.2981378 | No  |
| 9041 | HMDB0114751                       | LPA(22:2(13Z,16Z)/0:0)                                                                                                               | C25H47O7P   | 489.2981378 | No  |
| 9044 | HMDB0034525; C08931               | Barringtonol C                                                                                                                       | C30H50O5    | 489.3579199 | No  |
| 9044 | HMDB0034532                       | Camelliagenin C                                                                                                                      | C30H50O5    | 489.3579199 | No  |
| 9044 | HMDB0037783                       | Ganoderiol H                                                                                                                         | C30H50O5    | 489.3579199 | No  |
| 9079 | HMDB0036313                       | Erinacine P                                                                                                                          | C27H40O8    | 491.2647578 | No  |
| 9082 | HMDB0062304                       | 1-(11Z-docosenoyl)-glycero-3-phosphate                                                                                               | C25H49O7P   | 491.3150739 | No  |
| 9082 | HMDB0114750                       | LPA(22:1(13Z)/0:0)                                                                                                                   | C25H49O7P   | 491.3150739 | No  |
| 9114 | HMDB0033655                       | 7,11-Bisdeacetylvaltrate 7-(3-methylpentanoate) 11-(3-methylpentanoate)                                                              | C26H38O9    | 493.2446853 | No  |
| 9144 | HMDB0038680                       | Musabablisiane A                                                                                                                     | C23H28O12   | 495.1512171 | No  |
| 9144 | HMDB0039026                       | (R)-Isobyakangelicin 3''-glucoside                                                                                                   | C23H28O12   | 495.1512171 | No  |
| 9144 | HMDB0039069                       | (R)-Byakangelicin 3''-glucoside                                                                                                      | C23H28O12   | 495.1512171 | No  |
| 9144 | HMDB0039070                       | (R)-Byakangelicin 2''-glucoside                                                                                                      | C23H28O12   | 495.1512171 | No  |
| 9144 | HMDB0060491; CHEBI:64689          | Mycophenolic acid O-acyl-glucuronide                                                                                                 | C23H28O12   | 495.1512171 | No  |
| 9144 | HMDB0060634                       | Mycophenolic acid glucuronide                                                                                                        | C23H28O12   | 495.1512171 | No  |
| 9144 | HMDB0130138                       | 3,4,5-trihydroxy-6-([8-(2-hydroxypropan-2-yl)-4-(1-hydroxy-2-methyl-2-oxo-4-propyl-2H,8H-furo[2,3-b]pyridine-5-yl)]oxy)hexanoic acid | C23H28O12   | 495.1512171 | No  |
| 9144 | HMDB0130140                       | 3,4,5-trihydroxy-6-([8-(2-hydroxypropan-2-yl)-4-(2-hydroxy-2-methyl-2-oxo-4-propyl-2H,8H-furo[2,3-b]pyridine-5-yl)]oxy)hexanoic acid | C23H28O12   | 495.1512171 | No  |
| 9144 | HMDB0130142                       | 6-([8-(1,2-dihydroxypropan-2-yl)-2-oxo-4-propyl-2H,8H-furo[2,3-b]pyridine-5-yl)]oxyhexanoic acid                                     | C23H28O12   | 495.1512171 | No  |
| 9144 | HMDB0130144                       | 3,4,5-trihydroxy-6-([8-(2-hydroxypropan-2-yl)-4-(3-hydroxy-2-methyl-2-oxo-4-propyl-2H,8H-furo[2,3-b]pyridine-5-yl)]oxy)hexanoic acid | C23H28O12   | 495.1512171 | No  |
| 9145 | HMDB0010318; C03033               | Pregnanediol-3-glucuronide                                                                                                           | C27H44O8    | 495.2962419 | No  |
| 9145 | HMDB0010352                       | 3-alpha,20-alpha-Dihydroxy-5-beta-pregnane 3-glucuronide                                                                             | C27H44O8    | 495.2962419 | No  |
| 9145 | HMDB0041331                       | (3b,16b,20R)-Pregn-5-ene-3,16,20-triol 3-glucoside                                                                                   | C27H44O8    | 495.2962419 | No  |

|      |                                   |                                                                                                                                                                      |                |             |     |
|------|-----------------------------------|----------------------------------------------------------------------------------------------------------------------------------------------------------------------|----------------|-------------|-----|
| 9178 | HMDB0029291                       | 3,4-Dicaffeoyl-1,5-quinolactone                                                                                                                                      | C25H22O11      | 497.1093131 | Yes |
| 9195 | HMDB0011489                       | LysoPE(0:0/20:5(5Z,8Z,11Z,14Z,17Z))                                                                                                                                  | C25H42NO7P     | 498.2627138 | No  |
| 9195 | HMDB0011519                       | LysoPE(20:5(5Z,8Z,11Z,14Z,17Z)/0:0)                                                                                                                                  | C25H42NO7P     | 498.2627138 | No  |
| 9214 | HMDB0030127                       | Withaperuvine E                                                                                                                                                      | C28H36O8       | 499.2338544 | No  |
| 9214 | HMDB0041779                       | Tigloylgomocin H                                                                                                                                                     | C28H36O8       | 499.2338544 | No  |
| 9222 | HMDB0014554; C11758; CHEBI:135271 | Mupirocin                                                                                                                                                            | C26H44O9       | 499.2908018 | No  |
| 9223 | HMDB0005770; CHEBI:88947          | Tuftsine                                                                                                                                                             | C21H40N8O6     | 499.2989644 | No  |
| 9223 | HMDB0005776                       | Kentsine                                                                                                                                                             | C21H40N8O6     | 499.2989644 | No  |
| 9224 | HMDB0033234                       | Ganoderic acid beta                                                                                                                                                  | C30H44O6       | 499.3061743 | No  |
| 9224 | HMDB0034200                       | Physalolactone B                                                                                                                                                     | C30H44O6       | 499.3061743 | No  |
| 9224 | HMDB0035299                       | Ganolucidic acid D                                                                                                                                                   | C30H44O6       | 499.3061743 | No  |
| 9224 | HMDB0035302                       | Ganolucidic acid A                                                                                                                                                   | C30H44O6       | 499.3061743 | No  |
| 9234 | HMDB0005030; C06999; CHEBI:5050   | Fexofenadine                                                                                                                                                         | C32H39NO4      | 500.2802949 | No  |
| 9251 | HMDB0125131                       | 3,4,5-trihydroxy-6-{4-[(1E)-3-oxo-3-[(3,4,5,6-tetrahydro-2H-pyran-2-ylidene)-2-oxo-2-phenyl]-2-phenyl]-7-hydroxy-4-oxo-4H-chromene-7-yl}-7-hydroxy-4-oxo-4H-chromene | C21H26O14      | 501.1243155 | Yes |
| 9251 | HMDB0129614                       | {1-[2-(2,4-dihydroxyphenyl)-7-hydroxy-4-oxo-4H-chromene-7-yl]-2-phenyl}-7-hydroxy-4-oxo-4H-chromene                                                                  | C25H26O9S      | 501.1243155 | Yes |
| 9251 | HMDB0129618                       | {[(2Z)-2-{2-[2-(2,4-dihydroxyphenyl)-7-hydroxy-4-oxo-4H-chromene-7-yl]-2-phenyl}-7-hydroxy-4-oxo-4H-chromene-7-yl]-2-phenyl}-7-hydroxy-4-oxo-4H-chromene             | C25H26O9S      | 501.1243155 | Yes |
| 9251 | HMDB0129622                       | {(8-[2-(2,4-dihydroxyphenyl)-7-hydroxy-4-oxo-4H-chromene-7-yl]-2-phenyl)-7-hydroxy-4-oxo-4H-chromene                                                                 | C25H26O9S      | 501.1243155 | Yes |
| 9251 | HMDB0129626                       | {[(2E)-8-[2-(2,4-dihydroxyphenyl)-7-hydroxy-4-oxo-4H-chromene-7-yl]-2-phenyl]-7-hydroxy-4-oxo-4H-chromene                                                            | C25H26O9S      | 501.1243155 | Yes |
| 9251 | HMDB0129630                       | {(8-[2-(2,4-dihydroxyphenyl)-7-hydroxy-4-oxo-4H-chromene-7-yl]-2-phenyl)-7-hydroxy-4-oxo-4H-chromene                                                                 | C25H26O9S      | 501.1243155 | Yes |
| 9251 | HMDB0129650                       | {3-[3-(3,7-dimethylocta-2,6-dien-1-yl)-7-hydroxy-4-oxo-4H-chromene-7-yl]-2-phenyl}-7-hydroxy-4-oxo-4H-chromene                                                       | C25H26O9S      | 501.1243155 | Yes |
| 9251 | HMDB0134742                       | {4-[5,7-dihydroxy-8-(3-methylbut-2-en-1-yl)-4-oxo-4H-chromene-7-yl]-2-phenyl}-7-hydroxy-4-oxo-4H-chromene                                                            | C25H26O9S      | 501.1243155 | Yes |
| 9253 | HMDB0034551                       | Medicagenic acid                                                                                                                                                     | C30H46O6       | 501.3218149 | No  |
| 9253 | HMDB0034639                       | Esculentic acid (Phytolacca)                                                                                                                                         | C30H46O6       | 501.3218149 | No  |
| 9253 | HMDB0034704                       | 22-Deoxoisocucurbitacin D                                                                                                                                            | C30H46O6       | 501.3218149 | No  |
| 9253 | HMDB0034705                       | 22-Deoxocucurbitacin D                                                                                                                                               | C30H46O6       | 501.3218149 | No  |
| 9253 | HMDB0035751                       | Ganolucidic acid B                                                                                                                                                   | C30H46O6       | 501.3218149 | No  |
| 9264 | HMDB0011484                       | LysoPE(0:0/20:3(11Z,14Z,17Z))                                                                                                                                        | C25H46NO7P     | 502.2933162 | No  |
| 9264 | HMDB0011485; CHEBI:90579          | LysoPE(0:0/20:3(5Z,8Z,11Z))                                                                                                                                          | C25H46NO7P     | 502.2933162 | No  |
| 9264 | HMDB0011486                       | LysoPE(0:0/20:3(8Z,11Z,14Z))                                                                                                                                         | C25H46NO7P     | 502.2933162 | No  |
| 9264 | HMDB0011514                       | LysoPE(20:3(11Z,14Z,17Z)/0:0)                                                                                                                                        | C25H46NO7P     | 502.2933162 | No  |
| 9264 | HMDB0011515                       | LysoPE(20:3(5Z,8Z,11Z)/0:0)                                                                                                                                          | C25H46NO7P     | 502.2933162 | No  |
| 9264 | HMDB0011516                       | LysoPE(20:3(8Z,11Z,14Z)/0:0)                                                                                                                                         | C25H46NO7P     | 502.2933162 | No  |
| 9296 | HMDB0001512; C03028; CHEBI:9534   | Thiamine triphosphate                                                                                                                                                | C12H20N4O10P3S | 504.0049872 | No  |
| 9329 | HMDB0001134; C00053; CHEBI:17980  | Phosphoadenosine phosphosulfate                                                                                                                                      | C10H15N5O13P2S | 505.9806883 | Yes |
| 9351 | HMDB0034700                       | 1,2,4,8-Tetraacetoxo-7-hydroxy-3-(4-hydroxyphenyl)di                                                                                                                 | C26H20O11      | 507.095558  | No  |
| 9351 | HMDB0034701                       | 1,2,4,7-Tetraacetoxo-8-hydroxy-3-(4-hydroxyphenyl)di                                                                                                                 | C26H20O11      | 507.095558  | No  |
| 9351 | HMDB0039566                       | BL III                                                                                                                                                               | C26H20O11      | 507.095558  | No  |
| 9354 | HMDB0033164                       | Acetyl-T2 Toxin                                                                                                                                                      | C26H36O10      | 507.2228851 | No  |
| 9354 | HMDB0037002                       | Mozambioside                                                                                                                                                         | C26H36O10      | 507.2228851 | No  |
| 9354 | HMDB0037003                       | Cafamarine                                                                                                                                                           | C26H36O10      | 507.2228851 | No  |
| 9354 | HMDB0038611                       | Gibberellin A37 glucosyl ester                                                                                                                                       | C26H36O10      | 507.2228851 | No  |
| 9355 | HMDB0014423; C04931               | Argatroban                                                                                                                                                           | C23H36N6O5S    | 507.2377032 | Yes |
| 9355 | HMDB0129722                       | 2-(2,4-dihydroxyphenyl)-3-(3,7-dimethylocta-2,6-dien-1-yl)-5,7-dihydroxy-3-(4-hydroxy-3-(4-hydroxyphenyl)di                                                          | C30H36O7       | 507.2377032 | Yes |
| 9355 | HMDB0129723                       | 2-(2,4-dihydroxyphenyl)-5,7-dihydroxy-3-(4-hydroxy-3-(4-hydroxyphenyl)di                                                                                             | C30H36O7       | 507.2377032 | Yes |
| 9355 | HMDB0129724                       | 2-(2,4-dihydroxyphenyl)-5,7-dihydroxy-3-[4-hydroxy-3-(4-hydroxyphenyl)di                                                                                             | C30H36O7       | 507.2377032 | Yes |
| 9355 | HMDB0129725                       | 2-(2,4-dihydroxyphenyl)-5,7-dihydroxy-3-(8-hydroxy-3-(4-hydroxyphenyl)di                                                                                             | C30H36O7       | 507.2377032 | Yes |
| 9355 | HMDB0129726                       | 2-(2,4-dihydroxyphenyl)-5,7-dihydroxy-3-[(6E)-8-hydroxy-3-(4-hydroxyphenyl)di                                                                                        | C30H36O7       | 507.2377032 | Yes |
| 9355 | HMDB0129727                       | 2-(2,4-dihydroxyphenyl)-5,7-dihydroxy-3-(5-hydroxy-3-(4-hydroxyphenyl)di                                                                                             | C30H36O7       | 507.2377032 | Yes |
| 9355 | HMDB0129728                       | 2-(2,4-dihydroxyphenyl)-3-(3,7-dimethylocta-2,6-dien-1-yl)-5,7-dihydroxy-3-(4-hydroxy-3-(4-hydroxyphenyl)di                                                          | C30H36O7       | 507.2377032 | Yes |
| 9355 | HMDB0129729                       | 2-(2,4-dihydroxyphenyl)-5,7-dihydroxy-3-[[3-methyl-3-(4-hydroxyphenyl)di                                                                                             | C30H36O7       | 507.2377032 | Yes |
| 9355 | HMDB0129730                       | 2-(2,4-dihydroxyphenyl)-3-[5-(3,3-dimethyloxiran-2-yl)-5,7-dihydroxy-3-(4-hydroxy-3-(4-hydroxyphenyl)di                                                              | C30H36O7       | 507.2377032 | Yes |
| 9355 | HMDB0129731                       | 3-(3,7-dimethylocta-2,6-dien-1-yl)-5,7-dihydroxy-6-(3-(4-hydroxyphenyl)di                                                                                            | C30H36O7       | 507.2377032 | Yes |
| 9358 | HMDB0115485                       | PA(8:0/14:0)                                                                                                                                                         | C25H49O8P      | 507.3088697 | No  |
| 9358 | HMDB0115611                       | PA(10:0/i-12:0)                                                                                                                                                      | C25H49O8P      | 507.3088697 | No  |
| 9358 | HMDB0115687                       | PA(8:0/i-14:0)                                                                                                                                                       | C25H49O8P      | 507.3088697 | No  |
| 9361 | HMDB0035853                       | Fasciculol C                                                                                                                                                         | C30H52O6       | 507.3682039 | No  |
| 9386 | HMDB0127320                       | {5-[6-(3,4-dihydroxy-6-methyl-5-oxooxan-2-yl)-5,7-dihydroxy-4-oxo-4H-chromene-7-yl]-2-phenyl}-7-hydroxy-4-oxo-4H-chromene                                            | C21H18O13S     | 509.0379599 | No  |
| 9386 | HMDB0127321                       | {2-[2-(3,4-dihydroxyphenyl)-5,7-dihydroxy-4-oxo-4H-chromene-7-yl]-2-phenyl}-7-hydroxy-4-oxo-4H-chromene                                                              | C21H18O13S     | 509.0379599 | No  |
| 9386 | HMDB0127322                       | {2-[2-(3,4-dihydroxyphenyl)-5,7-dihydroxy-4-oxo-4H-chromene-7-yl]-2-phenyl}-7-hydroxy-4-oxo-4H-chromene                                                              | C21H18O13S     | 509.0379599 | No  |
| 9388 | HMDB0041535                       | Piperenol A triacetate                                                                                                                                               | C27H26O10      | 509.1430499 | No  |
| 9402 | HMDB0013863                       | AFN911                                                                                                                                                               | C29H33N7O2     | 510.2599005 | No  |

|      |                                  |                                                        |                |             |     |
|------|----------------------------------|--------------------------------------------------------|----------------|-------------|-----|
| 9419 | HMDB0035980                      | 3,7,11,15,23-Pentaoxolanost-8-en-26-oic acid           | C30H40O7       | 511.270531  | Yes |
| 9419 | HMDB0036059                      | Ganoderenic acid D                                     | C30H40O7       | 511.270531  | Yes |
| 9419 | HMDB0036406                      | Ganosporelactone A                                     | C30H40O7       | 511.270531  | Yes |
| 9419 | HMDB0036414                      | Anabsin                                                | C30H40O7       | 511.270531  | Yes |
| 9429 | HMDB0127805                      | 4-{7-[(6-carboxy-3,4,5-trihydroxyoxan-2-yl)oxy]-3-hydr | C21H21O13S     | 512.0631414 | No  |
| 9429 | HMDB0127806                      | 2-{3-[(6-carboxy-3,4,5-trihydroxyoxan-2-yl)oxy]-4-hydr | C21H21O13S     | 512.0631414 | No  |
| 9429 | HMDB0127902                      | 2-[(6-carboxy-3,4,5-trihydroxyoxan-2-yl)oxy]-4-(3,5-di | C21H21O13S     | 512.0631414 | No  |
| 9433 | HMDB0032880                      | trans-Zeatin-O-glucoside riboside                      | C21H31N5O10    | 512.1987996 | No  |
| 9433 | HMDB0036593                      | Validamycin B                                          | C20H35NO14     | 512.1987996 | No  |
| 9457 | HMDB0035079                      | (7alpha,10beta)-1(10->19)-Abeo-7-acetoxyisoobacun-7    | C28H34O9       | 513.2123219 | No  |
| 9457 | HMDB0035772; C08773              | Nomilin                                                | C28H34O9       | 513.2123219 | No  |
| 9464 | HMDB0030737                      | Capsianoside V                                         | C26H42O10      | 513.2706698 | Yes |
| 9464 | HMDB0034677                      | Cinn cassiol D1 glucoside                              | C26H42O10      | 513.2706698 | Yes |
| 9464 | HMDB0035065                      | Cinn cassiol D4 2-glucoside                            | C26H42O10      | 513.2706698 | Yes |
| 9464 | HMDB0035096                      | Cofaryloside                                           | C26H42O10      | 513.2706698 | Yes |
| 9483 | HMDB0000036; C05122; CHEBI:28865 | Taurocholic acid                                       | C26H45NO7S     | 514.2841366 | Yes |
| 9483 | HMDB0000889                      | Tauroursocholic acid                                   | C26H45NO7S     | 514.2841366 | Yes |
| 9483 | HMDB0000922                      | Taurallocholic acid                                    | C26H45NO7S     | 514.2841366 | Yes |
| 9483 | HMDB0000932                      | Tauro-b-muricholic acid                                | C26H45NO7S     | 514.2841366 | Yes |
| 9483 | HMDB0011637; C15516              | Taurohyocholate                                        | C26H45NO7S     | 514.2841366 | Yes |
| 9504 | HMDB0060863                      | Perindoprilat glucuronide                              | C23H36N2O11    | 515.2253028 | No  |
| 9544 | HMDB0034392                      | Perulactone                                            | C30H46O7       | 517.3164303 | No  |
| 9544 | HMDB0035304                      | Ganoderic acid C2                                      | C30H46O7       | 517.3164303 | No  |
| 9544 | HMDB0035699                      | Corosin                                                | C30H46O7       | 517.3164303 | No  |
| 9544 | HMDB0039691                      | Ganolucidic acid C                                     | C30H46O7       | 517.3164303 | No  |
| 9545 | HMDB0037781                      | Ganoderiol C                                           | C32H54O5       | 517.3892479 | No  |
| 9574 | HMDB0030116                      | Withaperuvins D                                        | C28H40O9       | 519.2608488 | No  |
| 9574 | HMDB0034191                      | Withaperuvins B                                        | C28H40O9       | 519.2608488 | No  |
| 9574 | HMDB0060141                      | rac-4-Hydroxy-4-O-(beta-D-glucuronide)-all-trans-retin | C28H40O9       | 519.2608488 | No  |
| 9613 | HMDB0037182; C11624              | Polysorbate 20                                         | C26H50O10      | 521.3335502 | No  |
| 9657 | HMDB0127110                      | [(6-[5,7-dihydroxy-2-(4-methoxyphenyl)-4-oxo-4H-chro   | C22H22O13S     | 525.0721066 | No  |
| 9657 | HMDB0127111                      | [2-[5,7-dihydroxy-2-(4-methoxyphenyl)-4-oxo-4H-chro    | C22H22O13S     | 525.0721066 | No  |
| 9657 | HMDB0127112                      | [2-[5,7-dihydroxy-2-(4-methoxyphenyl)-4-oxo-4H-chro    | C22H22O13S     | 525.0721066 | No  |
| 9657 | HMDB0127113                      | [6-[5,7-dihydroxy-2-(4-methoxyphenyl)-4-oxo-4H-chro    | C22H22O13S     | 525.0721066 | No  |
| 9657 | HMDB0127139                      | [(3,4,5-trihydroxy-6-[5-hydroxy-2-(4-hydroxyphenyl)-7- | C22H22O13S     | 525.0721066 | No  |
| 9657 | HMDB0127140                      | [4,5-dihydroxy-2-[5-hydroxy-2-(4-hydroxyphenyl)-7-m    | C22H22O13S     | 525.0721066 | No  |
| 9657 | HMDB0127141                      | [3,5-dihydroxy-2-[5-hydroxy-2-(4-hydroxyphenyl)-7-m    | C22H22O13S     | 525.0721066 | No  |
| 9657 | HMDB0127142                      | [4,5-dihydroxy-6-[5-hydroxy-2-(4-hydroxyphenyl)-7-m    | C22H22O13S     | 525.0721066 | No  |
| 9657 | HMDB0127186                      | [(6-[5,6-dihydroxy-7-methoxy-4-oxo-2-phenyl-4H-chro    | C22H22O13S     | 525.0721066 | No  |
| 9657 | HMDB0127187                      | [2-[5,6-dihydroxy-7-methoxy-4-oxo-2-phenyl-4H-chro     | C22H22O13S     | 525.0721066 | No  |
| 9657 | HMDB0127188                      | [2-[5,6-dihydroxy-7-methoxy-4-oxo-2-phenyl-4H-chro     | C22H22O13S     | 525.0721066 | No  |
| 9657 | HMDB0127189                      | [6-[5,6-dihydroxy-7-methoxy-4-oxo-2-phenyl-4H-chro     | C22H22O13S     | 525.0721066 | No  |
| 9657 | HMDB0127209                      | [3-[5-hydroxy-7-methoxy-4-oxo-8-[3,4,5-trihydroxy-6-(  | C22H22O13S     | 525.0721066 | No  |
| 9657 | HMDB0127210                      | [(3,4,5-trihydroxy-6-[5-hydroxy-2-(3-hydroxyphenyl)-7- | C22H22O13S     | 525.0721066 | No  |
| 9657 | HMDB0127211                      | [4,5-dihydroxy-2-[5-hydroxy-2-(3-hydroxyphenyl)-7-m    | C22H22O13S     | 525.0721066 | No  |
| 9657 | HMDB0127212                      | [3,5-dihydroxy-2-[5-hydroxy-2-(3-hydroxyphenyl)-7-m    | C22H22O13S     | 525.0721066 | No  |
| 9657 | HMDB0127213                      | [4,5-dihydroxy-6-[5-hydroxy-2-(3-hydroxyphenyl)-7-m    | C22H22O13S     | 525.0721066 | No  |
| 9657 | HMDB0127377                      | [(6-[5,7-dihydroxy-2-(3-methoxyphenyl)-4-oxo-4H-chro   | C22H22O13S     | 525.0721066 | No  |
| 9657 | HMDB0127378                      | [2-[5,7-dihydroxy-2-(3-methoxyphenyl)-4-oxo-4H-chro    | C22H22O13S     | 525.0721066 | No  |
| 9657 | HMDB0127379                      | [2-[5,7-dihydroxy-2-(3-methoxyphenyl)-4-oxo-4H-chro    | C22H22O13S     | 525.0721066 | No  |
| 9657 | HMDB0127380                      | [6-[5,7-dihydroxy-2-(3-methoxyphenyl)-4-oxo-4H-chro    | C22H22O13S     | 525.0721066 | No  |
| 9657 | HMDB0128570                      | [3-[5-hydroxy-7-methoxy-4-oxo-6-[3,4,5-trihydroxy-6-(  | C22H22O13S     | 525.0721066 | No  |
| 9657 | HMDB0128571                      | [(3,4,5-trihydroxy-6-[5-hydroxy-2-(3-hydroxyphenyl)-7- | C22H22O13S     | 525.0721066 | No  |
| 9657 | HMDB0128572                      | [4,5-dihydroxy-2-[5-hydroxy-2-(3-hydroxyphenyl)-7-m    | C22H22O13S     | 525.0721066 | No  |
| 9657 | HMDB0128573                      | [3,5-dihydroxy-2-[5-hydroxy-2-(3-hydroxyphenyl)-7-m    | C22H22O13S     | 525.0721066 | No  |
| 9657 | HMDB0128574                      | [4,5-dihydroxy-6-[5-hydroxy-2-(3-hydroxyphenyl)-7-m    | C22H22O13S     | 525.0721066 | No  |
| 9665 | HMDB0006744; C05381; CHEBI:1463  | 3-Carboxy-1-hydroxypropylthiamine diphosphate          | C16H25N4O10P2S | 526.068897  | No  |
| 9689 | HMDB0040647                      | 16,17-Dihydro-16a,17-dihydroxygibberellins A4 17-gluc  | C25H36O12      | 527.2137298 | No  |
| 9693 | HMDB0038546                      | ent-6R,16bOH,17-Trihydroxy-7-oxo-6,7-seco-19,6-kaur    | C26H40O11      | 527.2496572 | Yes |
| 9694 | HMDB0033976                      | Physapubenolide                                        | C30H40O8       | 527.2637573 | No  |
| 9694 | HMDB0035797                      | Ganoderenic acid E                                     | C30H40O8       | 527.2637573 | No  |



|       |                                   |                                                                                                                             |              |             |     |
|-------|-----------------------------------|-----------------------------------------------------------------------------------------------------------------------------|--------------|-------------|-----|
| 9694  | HMDB0035895                       | 20-Hydroxy-3,7,11,15,23-pentaoxolanost-8-en-26-oic acid                                                                     | C30H40O8     | 527.2637573 | No  |
| 9694  | HMDB0037565                       | Artenolide                                                                                                                  | C30H40O8     | 527.2637573 | No  |
| 9706  | HMDB0002409                       | N-[(3a,5b,7b)-7-hydroxy-24-oxo-3-(sulfooxy)cholan-24-yl]phosphatidylcholine                                                 | C26H43NO8S   | 528.2624934 | Yes |
| 9706  | HMDB0002496; C15559; CHEBI:52031  | N-[(3a,5b,7a)-3-hydroxy-24-oxo-7-(sulfooxy)cholan-24-yl]phosphatidylcholine                                                 | C26H43NO8S   | 528.2624934 | Yes |
| 9706  | HMDB0002497; CHEBI:72733          | Glycochenodeoxycholate-3-sulfate                                                                                            | C26H43NO8S   | 528.2624934 | Yes |
| 9721  | HMDB0034679                       | Cinnassiol D2 glucoside                                                                                                     | C26H42O11    | 529.2657579 | No  |
| 9724  | HMDB0030392; C17615; CHEBI:227037 | Kukoamine A                                                                                                                 | C28H42N4O6   | 529.3044579 | No  |
| 9724  | HMDB0040844                       | (S)-Nerolidol 3-O-[a-L-rhamnopyranosyl-(1->2)-b-D-glucopyranoside]                                                          | C27H46O10    | 529.3044579 | No  |
| 9724  | HMDB0060525; C17616               | Kukoamine B                                                                                                                 | C28H42N4O6   | 529.3044579 | No  |
| 9724  | HMDB0060526; C17617               | Kukoamine C                                                                                                                 | C28H42N4O6   | 529.3044579 | No  |
| 9724  | HMDB0060527; C17618               | Kukoamine D                                                                                                                 | C28H42N4O6   | 529.3044579 | No  |
| 9728  | HMDB0034033                       | Sabadelin                                                                                                                   | C35H62O3     | 529.4619976 | Yes |
| 9728  | HMDB0040920; C08484               | Epoymurin A                                                                                                                 | C35H62O3     | 529.4619976 | Yes |
| 9728  | HMDB0040922                       | Epoymurin B                                                                                                                 | C35H62O3     | 529.4619976 | Yes |
| 9728  | HMDB0040923                       | Epomuricenin B                                                                                                              | C35H62O3     | 529.4619976 | Yes |
| 9780  | HMDB0029770                       | 7,8-Dihydromifoliol 9-[rhamnosyl-(1->6)-glucoside]                                                                          | C25H42O12    | 533.261389  | No  |
| 9780  | HMDB0037527                       | 3-Hydroxy-beta-ionol 3-[glucosyl-(1->6)-glucoside]                                                                          | C25H42O12    | 533.261389  | No  |
| 9781  | HMDB0033846                       | Corchoroside A                                                                                                              | C29H42O9     | 533.274189  | No  |
| 9784  | HMDB0035885                       | Ganoderic acid L                                                                                                            | C30H46O8     | 533.3146336 | No  |
| 9785  | HMDB0061692                       | 1-Linoleoylglycerophosphocholine                                                                                            | C27H53NO7P   | 533.3486875 | No  |
| 9785  | HMDB0061700                       | 2-Linoleoylglycerophosphocholine                                                                                            | C27H53NO7P   | 533.3486875 | No  |
| 9797  | HMDB0037974                       | Cyanidin 3-(6'''-malonylglucoside)                                                                                          | C24H23O14    | 534.0990992 | No  |
| 9797  | HMDB0041409                       | Cyanidin 3-(3'''-malonylglucoside)                                                                                          | C24H23O14    | 534.0990992 | No  |
| 9807  | HMDB0135509                       | 6-[5-{2-[[2-(3,4-dimethoxyphenyl)ethyl]-C-hydroxycarbonyl]-3-oxopropyl}oxy]-2-methyl-4-propyl-1,3-bis(4-phenoxy)benzene     | C26H33NO11   | 534.1980992 | No  |
| 9807  | HMDB0135511                       | 6-[4-{2-[[3-(3,4-dimethoxyphenyl)-1-hydroxypropyl]oxy]-3-oxopropyl}oxy]-2-methyl-4-propyl-1,3-bis(4-phenoxy)benzene         | C26H33NO11   | 534.1980992 | No  |
| 9807  | HMDB0135513                       | 6-[5-{2-[[3-(3,4-dimethoxyphenyl)-1-hydroxypropyl]oxy]-3-oxopropyl}oxy]-2-methyl-4-propyl-1,3-bis(4-phenoxy)benzene         | C26H33NO11   | 534.1980992 | No  |
| 9807  | HMDB0135515                       | 6-[4-{2-[[2-(3,4-dimethoxyphenyl)ethyl]-C-hydroxycarbonyl]-3-oxopropyl}oxy]-2-methyl-4-propyl-1,3-bis(4-phenoxy)benzene     | C26H33NO11   | 534.1980992 | No  |
| 9841  | HMDB0041137                       | Corchorosol A                                                                                                               | C29H44O9     | 535.2897895 | No  |
| 9842  | HMDB0041137                       | Corchorosol A                                                                                                               | C29H44O9     | 535.2911185 | No  |
| 9859  | HMDB0000790                       | N-Palmitoylsphingosine                                                                                                      | C34H67NO3    | 536.5040214 | No  |
| 9859  | HMDB0004949; C00195; CHEBI:72959  | Ceramide (d18:1/16:0)                                                                                                       | C34H67NO3    | 536.5040214 | No  |
| 9875  | HMDB0037690                       | Limocitrol 3-glucoside                                                                                                      | C24H26O14    | 537.1241082 | No  |
| 9875  | HMDB0038757                       | Isolimocitrol 3-glucoside                                                                                                   | C24H26O14    | 537.1241082 | No  |
| 9908  | HMDB0010357                       | Tetrahydroaldosterone-3-glucuronide                                                                                         | C27H40O11    | 539.2502196 | Yes |
| 9913  | HMDB0071246                       | TG(8:0/8:0/a-13:0)[rac]                                                                                                     | C32H60O6     | 539.4303956 | No  |
| 9913  | HMDB0071529                       | TG(8:0/8:0/i-13:0)                                                                                                          | C32H60O6     | 539.4303956 | No  |
| 9913  | HMDB0072647                       | TG(8:0/8:0/13:0)                                                                                                            | C32H60O6     | 539.4303956 | No  |
| 9913  | HMDB0096559                       | TG(a-13:0/8:0/8:0)[rac]                                                                                                     | C32H60O6     | 539.4303956 | No  |
| 9913  | HMDB0096560                       | TG(i-13:0/8:0/8:0)                                                                                                          | C32H60O6     | 539.4303956 | No  |
| 9913  | HMDB0096561                       | TG(13:0/8:0/8:0)                                                                                                            | C32H60O6     | 539.4303956 | No  |
| 9936  | HMDB0010320                       | Cortolone-3-glucuronide                                                                                                     | C27H42O11    | 541.2654781 | Yes |
| 9946  | HMDB0134859                       | 6,11-dihydroxy-7-(4-hydroxy-3,5-dimethoxyphenyl)-3-ylidene-2,3-diphenylacetone                                              | C25H19O12S   | 542.0498207 | No  |
| 9946  | HMDB0134867                       | 3,8-dihydroxy-7-(4-hydroxy-3,5-dimethoxyphenyl)-12-ylidene-2,3-diphenylacetone                                              | C25H19O12S   | 542.0498207 | No  |
| 9946  | HMDB0134868                       | 7-[3,5-dimethoxy-4-(sulfooxy)phenyl]-3,8-dihydroxy-1:2-benzodioxane                                                         | C25H19O12S   | 542.0498207 | No  |
| 9949  | HMDB0128686                       | 2-amino-4-({[1-((carboxymethyl)-C-hydroxycarbonimidate)]-2-oxo-3-oxopropyl}oxy)-2-methyl-4-propyl-1,3-bis(4-phenoxy)benzene | C22H29N3O11S | 542.1422207 | No  |
| 9994  | HMDB0002640                       | N-[(3a,5b,7a,12a)-3,12-dihydroxy-24-oxo-7-(sulfooxy)cyclopentacyclopentan-24-yl]phosphatidylcholine                         | C26H43NO9S   | 544.257491  | No  |
| 9994  | HMDB0002644                       | N-[(3a,5b,7a,12a)-3,7-dihydroxy-24-oxo-12-(sulfooxy)cyclopentacyclopentan-24-yl]phosphatidylcholine                         | C26H43NO9S   | 544.257491  | No  |
| 10031 | HMDB0040921                       | Diepomuricanin A                                                                                                            | C35H62O4     | 545.4564458 | No  |
| 10120 | HMDB0030870                       | 1-Hydroxy-3-methoxy-7-primeverosyloxyxanthone                                                                               | C25H28O14    | 551.1379916 | No  |
| 10120 | HMDB0030872                       | Gentioside                                                                                                                  | C25H28O14    | 551.1379916 | No  |
| 10120 | HMDB0033770                       | 7-Hydroxy-3-methoxy-1-primeverosyloxyxanthone                                                                               | C25H28O14    | 551.1379916 | No  |
| 10120 | HMDB0040506                       | 3'',5,6-Trihydroxy-3,4'',7,8-tetramethoxyflavone 3-glucuronide                                                              | C25H28O14    | 551.1379916 | No  |
| 10124 | HMDB0004309; C06085; CHEBI:27151  | Triterpenoid                                                                                                                | C30H48O7S    | 551.3056004 | No  |
| 10124 | HMDB0015642; CHEBI:37922          | Arbekacin                                                                                                                   | C22H44N6O10  | 551.3056004 | No  |
| 10125 | HMDB0002513; C03033               | Lithocholate 3-O-glucuronide                                                                                                | C30H48O9     | 551.322608  | No  |
| 10142 | HMDB0128320                       | 3-{3-[3,5-dihydroxy-4-(sulfooxy)benzoyloxy]-4,5-dihydroxy-2-methyl-4-propyl-1,3-bis(4-phenoxy)benzoyloxy}benzoic acid       | C21H14O16S   | 552.9924517 | No  |
| 10142 | HMDB0128321                       | 3,4-dihydroxy-5-[3-hydroxy-4-(sulfooxy)-5-(3,4,5-trihydroxybenzoyloxy)benzoyloxy]benzoic acid                               | C21H14O16S   | 552.9924517 | No  |
| 10142 | HMDB0128322                       | 3-[3,4-dihydroxy-5-(3,4,5-trihydroxybenzoyloxy)benzoyloxy]benzoic acid                                                      | C21H14O16S   | 552.9924517 | No  |
| 10146 | HMDB0039051                       | Notoginsenoside R10                                                                                                         | C30H50O9     | 553.336672  | No  |
| 10299 | HMDB0036856                       | 19-Hydroxycinnzeylanol 19-glucoside                                                                                         | C26H42O13    | 561.2561987 | No  |
| 10304 | HMDB0007017                       | DG(14:0/18:3(6Z,9Z,12Z)/0:0)                                                                                                | C35H62O5     | 561.4517409 | No  |

|       |                                   |                                                       |             |             |     |
|-------|-----------------------------------|-------------------------------------------------------|-------------|-------------|-----|
| 10304 | HMDB0007018                       | DG(14:0/18:3(9Z,12Z,15Z)/0:0)                         | C35H62O5    | 561.4517409 | No  |
| 10304 | HMDB0007045                       | DG(14:1(9Z)/18:2(9Z,12Z)/0:0)                         | C35H62O5    | 561.4517409 | No  |
| 10304 | HMDB0007241                       | DG(18:2(9Z,12Z)/14:1(9Z)/0:0)                         | C35H62O5    | 561.4517409 | No  |
| 10304 | HMDB0007269                       | DG(18:3(6Z,9Z,12Z)/14:0/0:0)                          | C35H62O5    | 561.4517409 | No  |
| 10304 | HMDB0007298                       | DG(18:3(9Z,12Z,15Z)/14:0/0:0)                         | C35H62O5    | 561.4517409 | No  |
| 10304 | HMDB0035898                       | Robustocin                                            | C35H62O5    | 561.4517409 | No  |
| 10304 | HMDB0055968                       | DG(14:0/0:0/18:3n6)                                   | C35H62O5    | 561.4517409 | No  |
| 10304 | HMDB0055975                       | DG(14:0/0:0/18:3n3)                                   | C35H62O5    | 561.4517409 | No  |
| 10327 | HMDB0029260                       | Apigenin 6-C-glucoside 8-C-arabinoside                | C26H28O14   | 563.1427315 | Yes |
| 10327 | HMDB0030803                       | Corymboside                                           | C26H28O14   | 563.1427315 | Yes |
| 10327 | HMDB0030843; C04858; CHEBI:15932  | Apiin                                                 | C26H28O14   | 563.1427315 | Yes |
| 10327 | HMDB0033571                       | 6-beta-D-Glucopyranosyl-8-beta-D-ribosepyranosylapige | C26H28O14   | 563.1427315 | Yes |
| 10327 | HMDB0037569                       | Isovitexin 2'''-O-arabinoside                         | C26H28O14   | 563.1427315 | Yes |
| 10327 | HMDB0037575                       | Kaempferol 3-arabinofuranoside 7-rhamnofuranoside     | C26H28O14   | 563.1427315 | Yes |
| 10327 | HMDB0039319                       | Kaempferol 3-rhamnoside 7-xyloside                    | C26H28O14   | 563.1427315 | Yes |
| 10327 | HMDB0039321                       | Kaempferol 3-rhamnoside 4''-xyloside                  | C26H28O14   | 563.1427315 | Yes |
| 10327 | HMDB0126884                       | 5,7-dihydroxy-2-(3-hydroxyphenyl)-6-[3,4,5-trihydroxy | C26H28O14   | 563.1427315 | Yes |
| 10339 | HMDB0000829                       | N-Stearoylsphingosine                                 | C36H71NO3   | 564.5381843 | No  |
| 10339 | HMDB0004950; C00195               | Ceramide (d18:1/18:0)                                 | C36H71NO3   | 564.5381843 | No  |
| 10339 | HMDB0011762; CHEBI:88431          | Cer(d18:0/18:1(11Z))                                  | C36H71NO3   | 564.5381843 | No  |
| 10339 | HMDB0011763; CHEBI:74100          | Cer(d18:0/18:1(9Z))                                   | C36H71NO3   | 564.5381843 | No  |
| 10370 | HMDB0014365; C07257; CHEBI:117224 | Nelfinavir                                            | C32H45N3O4S | 566.3048651 | No  |
| 10389 | HMDB0029252                       | Phloretin xylosyl-galactoside                         | C26H32O14   | 567.1713428 | No  |
| 10389 | HMDB0031726                       | cis-Mulberroside A                                    | C26H32O14   | 567.1713428 | No  |
| 10389 | HMDB0039384                       | Piceatannol 3,4''-diglucoside                         | C26H32O14   | 567.1713428 | No  |
| 10390 | HMDB0006465; C06462               | Leukotriene F4                                        | C28H44N2O8S | 567.2723911 | No  |
| 10390 | HMDB0062488                       | leukotriene-f4                                        | C28H44N2O8S | 567.2723911 | No  |
| 10391 | HMDB0034084                       | Canesceol                                             | C29H44O11   | 567.2812494 | No  |
| 10391 | HMDB0039773                       | 11-alpha-O-beta-D-Glucopyranosyl-16alpha-O-methylr    | C29H44O11   | 567.2812494 | No  |
| 10392 | HMDB0001097; C01079; CHEBI:15435  | Protoporphyrinogen IX                                 | C34H40N4O4  | 567.2971011 | No  |
| 10392 | HMDB0029342                       | Ceanothine E                                          | C34H40N4O4  | 567.2971011 | No  |
| 10392 | HMDB0034101; C09994               | Adouetine Y                                           | C34H40N4O4  | 567.2971011 | No  |
| 10395 | HMDB0002430                       | (3a,5b,7a)-23-Carboxy-7-hydroxy-24-norcholan-3-yl-b-  | C30H48O10   | 567.3172343 | No  |
| 10395 | HMDB0002596; C03033               | Deoxycholic acid 3-glucuronide                        | C30H48O10   | 567.3172343 | No  |
| 10398 | HMDB0071165                       | TG(10:0/13:0/8:0)                                     | C34H64O6    | 567.4619086 | No  |
| 10398 | HMDB0071222                       | TG(8:0/8:0/15:0)                                      | C34H64O6    | 567.4619086 | No  |
| 10398 | HMDB0071443                       | TG(10:0/a-13:0/8:0)[rac]                              | C34H64O6    | 567.4619086 | No  |
| 10398 | HMDB0071663                       | TG(8:0/10:0/i-13:0)                                   | C34H64O6    | 567.4619086 | No  |
| 10398 | HMDB0071676                       | TG(8:0/8:0/a-15:0)[rac]                               | C34H64O6    | 567.4619086 | No  |
| 10398 | HMDB0071685                       | TG(10:0/i-13:0/8:0)                                   | C34H64O6    | 567.4619086 | No  |
| 10398 | HMDB0071738                       | TG(8:0/8:0/i-15:0)                                    | C34H64O6    | 567.4619086 | No  |
| 10398 | HMDB0071968                       | TG(8:0/a-13:0/10:0)[rac]                              | C34H64O6    | 567.4619086 | No  |
| 10398 | HMDB0072206                       | TG(10:0/8:0/a-13:0)[rac]                              | C34H64O6    | 567.4619086 | No  |
| 10398 | HMDB0072245                       | TG(8:0/10:0/a-13:0)[rac]                              | C34H64O6    | 567.4619086 | No  |
| 10398 | HMDB0072333                       | TG(8:0/10:0/13:0)                                     | C34H64O6    | 567.4619086 | No  |
| 10398 | HMDB0072338                       | TG(10:0/8:0/i-13:0)                                   | C34H64O6    | 567.4619086 | No  |
| 10398 | HMDB0072529                       | TG(8:0/13:0/10:0)                                     | C34H64O6    | 567.4619086 | No  |
| 10398 | HMDB0072531                       | TG(10:0/8:0/13:0)                                     | C34H64O6    | 567.4619086 | No  |
| 10398 | HMDB0072546                       | TG(8:0/i-13:0/10:0)                                   | C34H64O6    | 567.4619086 | No  |
| 10398 | HMDB0096562                       | TG(a-13:0/8:0/10:0)[rac]                              | C34H64O6    | 567.4619086 | No  |
| 10398 | HMDB0096563                       | TG(i-13:0/8:0/10:0)                                   | C34H64O6    | 567.4619086 | No  |
| 10398 | HMDB0096564                       | TG(13:0/8:0/10:0)                                     | C34H64O6    | 567.4619086 | No  |
| 10398 | HMDB0096649                       | TG(a-13:0/10:0/8:0)[rac]                              | C34H64O6    | 567.4619086 | No  |
| 10398 | HMDB0096650                       | TG(i-13:0/10:0/8:0)                                   | C34H64O6    | 567.4619086 | No  |
| 10398 | HMDB0096651                       | TG(13:0/10:0/8:0)                                     | C34H64O6    | 567.4619086 | No  |
| 10398 | HMDB0100884                       | TG(a-15:0/8:0/8:0)[rac]                               | C34H64O6    | 567.4619086 | No  |
| 10398 | HMDB0100885                       | TG(i-15:0/8:0/8:0)                                    | C34H64O6    | 567.4619086 | No  |
| 10398 | HMDB0100886                       | TG(15:0/8:0/8:0)                                      | C34H64O6    | 567.4619086 | No  |
| 10406 | HMDB0041911                       | Isepamicin                                            | C22H43N5O12 | 568.2843109 | No  |
| 10429 | HMDB0035696                       | Pyrrhoxanthinol                                       | C37H46O5    | 569.3256224 | No  |
| 10430 | HMDB0035292                       | Ganodermic acid P2                                    | C34H50O7    | 569.3507708 | No  |

|       |                                  |                                                                |              |             |     |
|-------|----------------------------------|----------------------------------------------------------------|--------------|-------------|-----|
| 10430 | HMDB0035294                      | Ganoderic acid Mk                                              | C34H50O7     | 569.3507708 | No  |
| 10430 | HMDB0035605                      | 3alpha,15alpha-Diacetoxy-(22R)-hydroxylanosta-7,9(1:3)         | C34H50O7     | 569.3507708 | No  |
| 10441 | HMDB0035519                      | 1,1''-(1,4-Dihydro-4-nonyl-3,5-pyridinediyl)bis[1-dodec        | C38H69NO2    | 570.5246506 | No  |
| 10497 | HMDB0007077                      | DG(15:0/18:4(6Z,9Z,12Z,15Z)/0:0)                               | C36H62O5     | 573.4511664 | No  |
| 10497 | HMDB0007329                      | DG(18:4(6Z,9Z,12Z,15Z)/15:0/0:0)                               | C36H62O5     | 573.4511664 | No  |
| 10497 | HMDB0056004                      | DG(15:0/0:0/18:4n3)                                            | C36H62O5     | 573.4511664 | No  |
| 10549 | HMDB0030046                      | Asparagoside A                                                 | C33H54O8     | 577.3746729 | No  |
| 10556 | HMDB0125088                      | [(6-{[5,7-dihydroxy-2-(4-oxocyclohexa-2,5-dien-1-ylide         | C30H27O12    | 578.1434591 | No  |
| 10601 | HMDB0032522                      | Stearyl monoglyceridyl citrate                                 | C28H54O12    | 581.3537869 | No  |
| 10635 | HMDB0002577                      | Cholic acid glucuronide                                        | C30H48O11    | 583.3118804 | Yes |
| 10666 | HMDB0001278; C03428; CHEBI:15442 | Presqualene diphosphate                                        | C30H52O7P2   | 585.3121916 | No  |
| 10666 | HMDB0012188; C01230; CHEBI:17528 | All-trans-hexaprenyl diphosphate                               | C30H52O7P2   | 585.3121916 | No  |
| 10705 | HMDB0033261                      | Mulberrofuran M                                                | C34H22O10    | 589.1153358 | No  |
| 10708 | HMDB0037956                      | (24R)-5b,8b-Epidioxergosta-6,22E-dien-3b-ol 3-glucos           | C34H54O8     | 589.3751831 | No  |
| 10728 | HMDB0001898; C05790; CHEBI:29026 | Mesobilirubinogen                                              | C33H44N4O6   | 591.3183723 | No  |
| 10729 | HMDB0034391                      | Agavoside A                                                    | C33H52O9     | 591.3523595 | No  |
| 10744 | HMDB0039077                      | Lactariamide B                                                 | C37H71NO4    | 592.5284645 | No  |
| 10745 | HMDB0039077                      | Lactariamide B                                                 | C37H71NO4    | 592.5326645 | No  |
| 10749 | HMDB0004951; C00195              | Ceramide (d18:1/20:0)                                          | C38H75NO3    | 592.5679545 | No  |
| 10756 | HMDB0034955; C17565              | Zizybeoside II                                                 | C25H38O16    | 593.2064642 | No  |
| 10757 | HMDB0004159; C05793              | L-Urobilin                                                     | C33H46N4O6   | 593.3337831 | No  |
| 10764 | HMDB0127912                      | 6-(4-{[5,7-dihydroxy-3-[(3,4,5-trihydroxyoxan-2-yl)oxy]-       | C26H27O16    | 594.1224251 | No  |
| 10764 | HMDB0127913                      | 6-(5-{[5,7-dihydroxy-3-[(3,4,5-trihydroxyoxan-2-yl)oxy]-       | C26H27O16    | 594.1224251 | No  |
| 10764 | HMDB0127914                      | 6-{[2-(3,4-dihydroxyphenyl)-5-hydroxy-3-[(3,4,5-trihyd         | C26H27O16    | 594.1224251 | No  |
| 10764 | HMDB0127915                      | 6-{[2-(3,4-dihydroxyphenyl)-7-hydroxy-3-[(3,4,5-trihyd         | C26H27O16    | 594.1224251 | No  |
| 10788 | HMDB0005811; C09732              | Eriocitrin                                                     | C27H32O15    | 595.1664834 | No  |
| 10788 | HMDB0034609                      | Isorubrofusarin 10-gentiobioside                               | C27H32O15    | 595.1664834 | No  |
| 10788 | HMDB0037407                      | (2R)-6,8-Diglucopyranosyl-4'',5,7-trihydroxyflavanone          | C27H32O15    | 595.1664834 | No  |
| 10788 | HMDB0037506; C09826              | Pinobanksin 5-[galactosyl-(1->4)-glucoside]                    | C27H32O15    | 595.1664834 | No  |
| 10788 | HMDB0038478                      | Rubrofusarin 6-gentiobioside                                   | C27H32O15    | 595.1664834 | No  |
| 10788 | HMDB0038550                      | Cassiaside C                                                   | C27H32O15    | 595.1664834 | No  |
| 10788 | HMDB0141965                      | 2-[3,4-bis(2-hydroxyethoxy)phenyl]-5-hydroxy-7-(2-hydr         | C27H32O15    | 595.1664834 | No  |
| 10794 | HMDB0004157; C05789; CHEBI:36479 | L-Urobilinogen                                                 | C33H48N4O6   | 595.3492986 | No  |
| 10796 | HMDB0002204; C08580; CHEBI:40968 | Astaxanthin                                                    | C40H52O4     | 595.3789633 | No  |
| 10796 | HMDB0039091                      | Capsorubinidione                                               | C40H52O4     | 595.3789633 | No  |
| 10796 | HMDB0039128                      | (3''RS,3''SR)-Astaxanthin                                      | C40H52O4     | 595.3789633 | No  |
| 10797 | HMDB0029315                      | Asparagoside B                                                 | C33H56O9     | 595.3852633 | No  |
| 10826 | HMDB0039579                      | Sucrose monopalmitate                                          | C28H54O13    | 597.3475325 | No  |
| 10880 | HMDB0014824                      | Pentosan Polysulfate                                           | C10H18O21S4  | 600.9160808 | No  |
| 10892 | HMDB0015006; CHEBI:3032          | Benzonate                                                      | C30H53NO11   | 602.3539393 | No  |
| 10892 | HMDB0033397                      | Fumonisin AK1                                                  | C30H53NO11   | 602.3539393 | No  |
| 10905 | HMDB0036060                      | Hebevinoside IV                                                | C36H60O7     | 603.4282382 | No  |
| 10905 | HMDB0039645                      | Ginsenoside Rh3                                                | C36H60O7     | 603.4282382 | No  |
| 10906 | HMDB0036295                      | Cycloartanyl ferulate                                          | C40H60O4     | 603.4421657 | No  |
| 10947 | HMDB0041368                      | 24-Acetyl- 25-cinnamoylvulgaroside                             | C36H48O8     | 607.3274775 | No  |
| 10975 | HMDB0132725                      | 6-[5-{3-[[3,4-dihydroxy-5-(hydroxymethyl)oxolan-2-yl](         | C26H26O17    | 609.1086064 | No  |
| 10975 | HMDB0132726                      | 6-{[3-{[3,4-dihydroxy-5-(hydroxymethyl)oxolan-2-yl]ox          | C26H26O17    | 609.1086064 | No  |
| 10975 | HMDB0132727                      | 6-{[3-{[3,4-dihydroxy-5-(hydroxymethyl)oxolan-2-yl]ox          | C26H26O17    | 609.1086064 | No  |
| 10975 | HMDB0135136                      | (3-{[3,7-dihydroxy-4-[3,5,7-trihydroxy-2-(3-hydroxyphe         | C30H26O12S   | 609.1086064 | No  |
| 10975 | HMDB0135137                      | (3-[8-{3,7-dihydroxy-2-(3-hydroxyphenyl)-3,4-dihydro-          | C30H26O12S   | 609.1086064 | No  |
| 10975 | HMDB0135138                      | [7-hydroxy-2-(3-hydroxyphenyl)-4-[3,5,7-trihydroxy-2- <i>i</i> | C30H26O12S   | 609.1086064 | No  |
| 11013 | HMDB0035606                      | (24E)-3beta,15alpha,22S-Triacetoxylanosta-7,9(11),24- <i>C</i> | C36H52O8     | 611.3572851 | No  |
| 11017 | HMDB0010355; C03033              | Cholestane-3,7,12,25-tetrol-3-glucuronide                      | C33H56O10    | 611.3784662 | No  |
| 11094 | HMDB0013022                      | Neuromedin N                                                   | C32H51N5O7   | 616.3693637 | No  |
| 11115 | HMDB0129016                      | 2-amino-4-({1-[(carboxymethyl)-C-hydroxycarbonimidic           | C29H37N3O10S | 618.2118708 | No  |
| 11115 | HMDB0129017                      | 2-amino-4-({1-[(carboxymethyl)-C-hydroxycarbonimidic           | C29H37N3O10S | 618.2118708 | No  |
| 11115 | HMDB0129021                      | 2-amino-4-({1-[(carboxymethyl)-C-hydroxycarbonimidic           | C29H37N3O10S | 618.2118708 | No  |
| 11115 | HMDB0129022                      | 2-amino-4-({1-[(carboxymethyl)-C-hydroxycarbonimidic           | C29H37N3O10S | 618.2118708 | No  |
| 11188 | HMDB0116642                      | PG(a-13:0/i-12:0)                                              | C31H61O10P   | 623.3922501 | No  |
| 11188 | HMDB0116655                      | PG(i-12:0/a-13:0)                                              | C31H61O10P   | 623.3922501 | No  |
| 11188 | HMDB0116661                      | PG(i-12:0/i-13:0)                                              | C31H61O10P   | 623.3922501 | No  |

|       |                                  |                                                          |            |             |     |
|-------|----------------------------------|----------------------------------------------------------|------------|-------------|-----|
| 11188 | HMDB0116678                      | PG(i-13:0/i-12:0)                                        | C31H61O10P | 623.3922501 | No  |
| 11214 | HMDB0039580                      | Sucrose monostearate                                     | C30H58O13  | 625.3816532 | No  |
| 11222 | HMDB0015641; CHEBI:661520        | Dabigatran etexilate                                     | C34H41N7O5 | 626.3108349 | No  |
| 11260 | HMDB0038377                      | Goshonoside F4                                           | C32H54O12  | 629.3536374 | No  |
| 11260 | HMDB0038378                      | Goshonoside F7                                           | C32H54O12  | 629.3536374 | No  |
| 11260 | HMDB0039577                      | Lyciumoside I                                            | C32H54O12  | 629.3536374 | No  |
| 11289 | HMDB0000825                      | 3''-Sialyllactose                                        | C23H39NO19 | 632.2034359 | Yes |
| 11289 | HMDB0006569                      | 6''-Sialyllactose                                        | C23H39NO19 | 632.2034359 | Yes |
| 11364 | HMDB0037462                      | Tricin 7-neohesperidoside                                | C29H34O16  | 637.177456  | No  |
| 11364 | HMDB0037467; C17441              | Rhamnazin 3-rutinoside                                   | C29H34O16  | 637.177456  | No  |
| 11441 | HMDB0125359                      | ((5-[(4,5-dihydroxy-2-([5-hydroxy-2-(4-hydroxyphenyl)-   | C26H28O17S | 643.0958925 | No  |
| 11441 | HMDB0125360                      | {2-[(4,5-dihydroxy-2-([5-hydroxy-2-(4-hydroxyphenyl)-    | C26H28O17S | 643.0958925 | No  |
| 11441 | HMDB0126914                      | (3-[5,7-dihydroxy-4-oxo-6-[3,4,5-trihydroxy-6-(hydroxy   | C26H28O17S | 643.0958925 | No  |
| 11441 | HMDB0126915                      | ([6-[5,7-dihydroxy-2-(3-hydroxyphenyl)-4-oxo-8-(3,4,5-   | C26H28O17S | 643.0958925 | No  |
| 11441 | HMDB0126916                      | {2-[5,7-dihydroxy-2-(3-hydroxyphenyl)-4-oxo-6-[3,4,5-    | C26H28O17S | 643.0958925 | No  |
| 11441 | HMDB0126917                      | {2-[5,7-dihydroxy-2-(3-hydroxyphenyl)-4-oxo-6-[3,4,5-    | C26H28O17S | 643.0958925 | No  |
| 11441 | HMDB0126918                      | {6-[5,7-dihydroxy-2-(3-hydroxyphenyl)-4-oxo-6-[3,4,5-    | C26H28O17S | 643.0958925 | No  |
| 11441 | HMDB0126919                      | {6-[5,7-dihydroxy-2-(3-hydroxyphenyl)-4-oxo-8-(3,4,5-    | C26H28O17S | 643.0958925 | No  |
| 11441 | HMDB0126920                      | {2-[5,7-dihydroxy-2-(3-hydroxyphenyl)-4-oxo-8-(3,4,5-    | C26H28O17S | 643.0958925 | No  |
| 11441 | HMDB0126921                      | {2-[5,7-dihydroxy-2-(3-hydroxyphenyl)-4-oxo-8-(3,4,5-    | C26H28O17S | 643.0958925 | No  |
| 11441 | HMDB0140261                      | {2-[5,7-dihydroxy-2-(4-hydroxyphenyl)-4-oxo-6-[3,4,5-    | C26H28O17S | 643.0958925 | No  |
| 11441 | HMDB0140262                      | {2-[5,7-dihydroxy-2-(4-hydroxyphenyl)-4-oxo-6-[3,4,5-    | C26H28O17S | 643.0958925 | No  |
| 11441 | HMDB0140263                      | {6-[5,7-dihydroxy-2-(4-hydroxyphenyl)-4-oxo-6-[3,4,5-    | C26H28O17S | 643.0958925 | No  |
| 11441 | HMDB0140264                      | {6-[5,7-dihydroxy-2-(4-hydroxyphenyl)-4-oxo-8-(3,4,5-    | C26H28O17S | 643.0958925 | No  |
| 11441 | HMDB0140265                      | {2-[5,7-dihydroxy-2-(4-hydroxyphenyl)-4-oxo-8-(3,4,5-    | C26H28O17S | 643.0958925 | No  |
| 11441 | HMDB0140266                      | {2-[5,7-dihydroxy-2-(4-hydroxyphenyl)-4-oxo-8-(3,4,5-    | C26H28O17S | 643.0958925 | No  |
| 11451 | HMDB0030530                      | Janthitrem F                                             | C39H51NO7  | 644.3604294 | No  |
| 11513 | HMDB0011768; CHEBI:52961         | Cer(d18:0/24:0)                                          | C42H85NO3  | 650.6470332 | No  |
| 11541 | HMDB0012187; C04216; CHEBI:17613 | All-trans-heptaprenyl diphosphate                        | C35H60O7P2 | 653.3756135 | No  |
| 11617 | HMDB0002318                      | Capsianoside I                                           | C32H52O14  | 659.3289239 | No  |
| 11628 | HMDB0008825; C00350              | PE(14:0/16:1(9Z))                                        | C35H68NO8P | 660.4604023 | No  |
| 11628 | HMDB0008857; C00350              | PE(14:1(9Z)/16:0)                                        | C35H68NO8P | 660.4604023 | No  |
| 11628 | HMDB0008921; C00350              | PE(16:0/14:1(9Z))                                        | C35H68NO8P | 660.4604023 | No  |
| 11628 | HMDB0008953; C00350              | PE(16:1(9Z)/14:0)                                        | C35H68NO8P | 660.4604023 | No  |
| 11628 | HMDB0112938                      | PE-NMe(14:1(9Z)/15:0)                                    | C35H68NO8P | 660.4604023 | No  |
| 11628 | HMDB0113018                      | PE-NMe(15:0/14:1(9Z))                                    | C35H68NO8P | 660.4604023 | No  |
| 11628 | HMDB0113839                      | PE-NMe2(14:0/14:1(9Z))                                   | C35H68NO8P | 660.4604023 | No  |
| 11628 | HMDB0113899                      | PE-NMe2(14:1(9Z)/14:0)                                   | C35H68NO8P | 660.4604023 | No  |
| 11640 | HMDB0008824; C00350              | PE(14:0/16:0)                                            | C35H70NO8P | 662.4755849 | No  |
| 11640 | HMDB0008889; C00350              | PE(15:0/15:0)                                            | C35H70NO8P | 662.4755849 | No  |
| 11640 | HMDB0008920; C00350              | PE(16:0/14:0)                                            | C35H70NO8P | 662.4755849 | No  |
| 11640 | HMDB0112936                      | PE-NMe(14:0/15:0)                                        | C35H70NO8P | 662.4755849 | No  |
| 11640 | HMDB0113017                      | PE-NMe(15:0/14:0)                                        | C35H70NO8P | 662.4755849 | No  |
| 11640 | HMDB0113837                      | PE-NMe2(14:0/14:0)                                       | C35H70NO8P | 662.4755849 | No  |
| 11652 | HMDB0114803                      | PA(14:1(9Z)/20:5(5Z,8Z,11Z,14Z,17Z))                     | C37H61O8P  | 663.4046323 | No  |
| 11652 | HMDB0115199                      | PA(20:5(5Z,8Z,11Z,14Z,17Z)/14:1(9Z))                     | C37H61O8P  | 663.4046323 | No  |
| 11674 | HMDB0000757; C00182; CHEBI:28087 | Glycogen                                                 | C24H42O21  | 665.2139976 | Yes |
| 11674 | HMDB0001296; C02052; CHEBI:61988 | Maltotetraose                                            | C24H42O21  | 665.2139976 | Yes |
| 11674 | HMDB0003553; C01613; CHEBI:17164 | Stachyose                                                | C24H42O21  | 665.2139976 | Yes |
| 11674 | HMDB0029931; C00464; CHEBI:28808 | Mannan                                                   | C24H42O21  | 665.2139976 | Yes |
| 11674 | HMDB0035323                      | Fagopyritol B3                                           | C24H42O21  | 665.2139976 | Yes |
| 11674 | HMDB0038490                      | Bifurcose                                                | C24H42O21  | 665.2139976 | Yes |
| 11674 | HMDB0038870                      | Neobifurcose                                             | C24H42O21  | 665.2139976 | Yes |
| 11674 | HMDB0038871; C08248              | Sesamose                                                 | C24H42O21  | 665.2139976 | Yes |
| 11674 | HMDB0039173                      | 3-beta-Glucosylcellotriose                               | C24H42O21  | 665.2139976 | Yes |
| 11674 | HMDB0039174                      | 3-beta-Cellobiosylcellobiose                             | C24H42O21  | 665.2139976 | Yes |
| 11674 | HMDB0039176                      | Nystose                                                  | C24H42O21  | 665.2139976 | Yes |
| 11674 | HMDB0040182                      | Fagopyritol A3                                           | C24H42O21  | 665.2139976 | Yes |
| 11675 | HMDB0126250                      | 2-{6-[2,4-dihydroxy-3-(3-methylbut-2-en-1-yl)benzoyl]-   | C39H38O10  | 665.2391571 | No  |
| 11675 | HMDB0126251                      | 2-{6-[2,4-dihydroxy-3-(3-methylbut-2-en-1-yl)benzoyl]-   | C39H38O10  | 665.2391571 | No  |
| 11675 | HMDB0126252                      | 2-{6-[2,4-dihydroxy-3-(4-hydroxy-3-methylbut-2-en-1-yl)- | C39H38O10  | 665.2391571 | No  |

|       |             |                                                                                                                                                                                                                     |             |             |    |
|-------|-------------|---------------------------------------------------------------------------------------------------------------------------------------------------------------------------------------------------------------------|-------------|-------------|----|
| 11675 | HMDB0126253 | 2-{6-[2,4-dihydroxy-3-[(2E)-4-hydroxy-3-methylbut-2-en-1-yl]benzoyl]-3-(3-methylbut-2-en-1-yl)benzoyl}-C39H38O10                                                                                                    | 665.2391571 | No          |    |
| 11675 | HMDB0126254 | 2-{6-[2,4-dihydroxy-3-(3-methylbut-2-en-1-yl)benzoyl]-3-(3-methylbut-2-en-1-yl)benzoyl}-C39H38O10                                                                                                                   | 665.2391571 | No          |    |
| 11675 | HMDB0126255 | 2-{6-[2,4-dihydroxy-3-(3-methylbut-2-en-1-yl)benzoyl]-3-(3-methylbut-2-en-1-yl)benzoyl}-C39H38O10                                                                                                                   | 665.2391571 | No          |    |
| 11675 | HMDB0126256 | 2-[5-(2,4-dihydroxyphenyl)-6-{3-[(3,3-dimethyloxiran-2-yl)methyl]-2-methylbut-2-en-1-yl}benzoyl]-C39H38O10                                                                                                          | 665.2391571 | No          |    |
| 11675 | HMDB0126257 | 2-{3-[2,4-dihydroxy-3-(3-methylbut-2-en-1-yl)benzoyl]-5-(3-methylbut-2-en-1-yl)benzoyl}-C39H38O10                                                                                                                   | 665.2391571 | No          |    |
| 11675 | HMDB0126258 | 5-{6-[2,4-dihydroxy-3-(3-methylbut-2-en-1-yl)benzoyl]-3-(3-methylbut-2-en-1-yl)benzoyl}-C39H38O10                                                                                                                   | 665.2391571 | No          |    |
| 11675 | HMDB0126259 | 3-{6-[2,4-dihydroxy-3-(3-methylbut-2-en-1-yl)benzoyl]-5-(3-methylbut-2-en-1-yl)benzoyl}-C39H38O10                                                                                                                   | 665.2391571 | No          |    |
| 11675 | HMDB0126260 | 5-[(E)-2-{4-[6-[2,4-dihydroxy-3-(3-methylbut-2-en-1-yl)benzoyl]-3-(3-methylbut-2-en-1-yl)benzoyl]-2-(4-[(E)-2-(2,4-dihydroxyphenyl)-6-{3-[(3,3-dimethyloxiran-2-yl)methyl]-2-methylbut-2-en-1-yl}benzoyl]-C39H38O10 | 665.2391571 | No          |    |
| 11675 | HMDB0126261 | 5-[6-(2,4-dihydroxyphenyl)-2-{4-[(E)-2-(2,4-dihydroxyphenyl)-6-{3-[(3,3-dimethyloxiran-2-yl)methyl]-2-methylbut-2-en-1-yl}benzoyl]-C39H38O10                                                                        | 665.2391571 | No          |    |
| 11681 | HMDB0114787 | PA(14:0/20:5(5Z,8Z,11Z,14Z,17Z))                                                                                                                                                                                    | C37H63O8P   | 665.4170269 | No |
| 11681 | HMDB0114801 | PA(14:1(9Z)/20:4(5Z,8Z,11Z,14Z))                                                                                                                                                                                    | C37H63O8P   | 665.4170269 | No |
| 11681 | HMDB0114802 | PA(14:1(9Z)/20:4(8Z,11Z,14Z,17Z))                                                                                                                                                                                   | C37H63O8P   | 665.4170269 | No |
| 11681 | HMDB0114859 | PA(16:1(9Z)/18:4(6Z,9Z,12Z,15Z))                                                                                                                                                                                    | C37H63O8P   | 665.4170269 | No |
| 11681 | HMDB0115031 | PA(18:4(6Z,9Z,12Z,15Z)/16:1(9Z))                                                                                                                                                                                    | C37H63O8P   | 665.4170269 | No |
| 11681 | HMDB0115145 | PA(20:4(5Z,8Z,11Z,14Z)/14:1(9Z))                                                                                                                                                                                    | C37H63O8P   | 665.4170269 | No |
| 11681 | HMDB0115172 | PA(20:4(8Z,11Z,14Z,17Z)/14:1(9Z))                                                                                                                                                                                   | C37H63O8P   | 665.4170269 | No |
| 11681 | HMDB0115198 | PA(20:5(5Z,8Z,11Z,14Z,17Z)/14:0)                                                                                                                                                                                    | C37H63O8P   | 665.4170269 | No |
| 11682 | HMDB0039050 | Notoginsenoside T2                                                                                                                                                                                                  | C37H62O10   | 665.426055  | No |
| 11683 | HMDB0007093 | DG(15:0/24:0/0:0)                                                                                                                                                                                                   | C42H82O5    | 665.6091873 | No |
| 11683 | HMDB0007793 | DG(24:0/15:0/0:0)                                                                                                                                                                                                   | C42H82O5    | 665.6091873 | No |
| 11683 | HMDB0055986 | DG(15:0/0:0/24:0)                                                                                                                                                                                                   | C42H82O5    | 665.6091873 | No |
| 11683 | HMDB0093423 | DG(i-14:0/a-25:0/0:0)                                                                                                                                                                                               | C42H82O5    | 665.6091873 | No |
| 11683 | HMDB0093424 | DG(i-14:0/0:0/a-25:0)                                                                                                                                                                                               | C42H82O5    | 665.6091873 | No |
| 11683 | HMDB0093425 | DG(14:0/a-25:0/0:0)                                                                                                                                                                                                 | C42H82O5    | 665.6091873 | No |
| 11683 | HMDB0093426 | DG(14:0/0:0/a-25:0)                                                                                                                                                                                                 | C42H82O5    | 665.6091873 | No |
| 11683 | HMDB0093584 | DG(a-15:0/i-24:0/0:0)                                                                                                                                                                                               | C42H82O5    | 665.6091873 | No |
| 11683 | HMDB0093585 | DG(a-15:0/0:0/i-24:0)                                                                                                                                                                                               | C42H82O5    | 665.6091873 | No |
| 11683 | HMDB0093586 | DG(i-15:0/i-24:0/0:0)                                                                                                                                                                                               | C42H82O5    | 665.6091873 | No |
| 11683 | HMDB0093587 | DG(i-15:0/0:0/i-24:0)                                                                                                                                                                                               | C42H82O5    | 665.6091873 | No |
| 11683 | HMDB0093588 | DG(15:0/i-24:0/0:0)                                                                                                                                                                                                 | C42H82O5    | 665.6091873 | No |
| 11683 | HMDB0093589 | DG(15:0/0:0/i-24:0)                                                                                                                                                                                                 | C42H82O5    | 665.6091873 | No |
| 11683 | HMDB0093862 | DG(17:0/22:0/0:0)                                                                                                                                                                                                   | C42H82O5    | 665.6091873 | No |
| 11683 | HMDB0093863 | DG(17:0/0:0/22:0)                                                                                                                                                                                                   | C42H82O5    | 665.6091873 | No |
| 11683 | HMDB0093864 | DG(i-17:0/22:0/0:0)                                                                                                                                                                                                 | C42H82O5    | 665.6091873 | No |
| 11683 | HMDB0093865 | DG(i-17:0/0:0/22:0)                                                                                                                                                                                                 | C42H82O5    | 665.6091873 | No |
| 11683 | HMDB0093866 | DG(a-17:0/i-22:0/0:0)                                                                                                                                                                                               | C42H82O5    | 665.6091873 | No |
| 11683 | HMDB0093867 | DG(a-17:0/0:0/i-22:0)                                                                                                                                                                                               | C42H82O5    | 665.6091873 | No |
| 11683 | HMDB0093868 | DG(a-17:0/22:0/0:0)                                                                                                                                                                                                 | C42H82O5    | 665.6091873 | No |
| 11683 | HMDB0093869 | DG(a-17:0/0:0/22:0)                                                                                                                                                                                                 | C42H82O5    | 665.6091873 | No |
| 11683 | HMDB0093870 | DG(i-17:0/i-22:0/0:0)                                                                                                                                                                                               | C42H82O5    | 665.6091873 | No |
| 11683 | HMDB0093871 | DG(i-17:0/0:0/i-22:0)                                                                                                                                                                                               | C42H82O5    | 665.6091873 | No |
| 11683 | HMDB0093872 | DG(17:0/i-22:0/0:0)                                                                                                                                                                                                 | C42H82O5    | 665.6091873 | No |
| 11683 | HMDB0093873 | DG(17:0/0:0/i-22:0)                                                                                                                                                                                                 | C42H82O5    | 665.6091873 | No |
| 11683 | HMDB0093971 | DG(18:0/21:0/0:0)                                                                                                                                                                                                   | C42H82O5    | 665.6091873 | No |
| 11683 | HMDB0093972 | DG(18:0/0:0/21:0)                                                                                                                                                                                                   | C42H82O5    | 665.6091873 | No |
| 11683 | HMDB0093973 | DG(i-18:0/21:0/0:0)                                                                                                                                                                                                 | C42H82O5    | 665.6091873 | No |
| 11683 | HMDB0093974 | DG(i-18:0/0:0/21:0)                                                                                                                                                                                                 | C42H82O5    | 665.6091873 | No |
| 11683 | HMDB0093975 | DG(i-18:0/a-21:0/0:0)                                                                                                                                                                                               | C42H82O5    | 665.6091873 | No |
| 11683 | HMDB0093976 | DG(i-18:0/0:0/a-21:0)                                                                                                                                                                                               | C42H82O5    | 665.6091873 | No |
| 11683 | HMDB0093977 | DG(i-18:0/i-21:0/0:0)                                                                                                                                                                                               | C42H82O5    | 665.6091873 | No |
| 11683 | HMDB0093978 | DG(i-18:0/0:0/i-21:0)                                                                                                                                                                                               | C42H82O5    | 665.6091873 | No |
| 11683 | HMDB0093979 | DG(18:0/i-21:0/0:0)                                                                                                                                                                                                 | C42H82O5    | 665.6091873 | No |
| 11683 | HMDB0093980 | DG(18:0/0:0/i-21:0)                                                                                                                                                                                                 | C42H82O5    | 665.6091873 | No |
| 11683 | HMDB0093981 | DG(18:0/a-21:0/0:0)                                                                                                                                                                                                 | C42H82O5    | 665.6091873 | No |
| 11683 | HMDB0093982 | DG(18:0/0:0/a-21:0)                                                                                                                                                                                                 | C42H82O5    | 665.6091873 | No |
| 11683 | HMDB0094081 | DG(19:0/20:0/0:0)                                                                                                                                                                                                   | C42H82O5    | 665.6091873 | No |
| 11683 | HMDB0094082 | DG(19:0/0:0/20:0)                                                                                                                                                                                                   | C42H82O5    | 665.6091873 | No |
| 11683 | HMDB0094083 | DG(i-19:0/20:0/0:0)                                                                                                                                                                                                 | C42H82O5    | 665.6091873 | No |
| 11683 | HMDB0094084 | DG(i-19:0/0:0/20:0)                                                                                                                                                                                                 | C42H82O5    | 665.6091873 | No |
| 11683 | HMDB0094085 | DG(i-19:0/i-20:0/0:0)                                                                                                                                                                                               | C42H82O5    | 665.6091873 | No |
| 11683 | HMDB0094086 | DG(i-19:0/0:0/i-20:0)                                                                                                                                                                                               | C42H82O5    | 665.6091873 | No |

|       |                                  |                                             |             |             |     |
|-------|----------------------------------|---------------------------------------------|-------------|-------------|-----|
| 11683 | HMDB0094087                      | DG(19:0/i-20:0/0:0)                         | C42H82O5    | 665.6091873 | No  |
| 11683 | HMDB0094088                      | DG(19:0/0:0/i-20:0)                         | C42H82O5    | 665.6091873 | No  |
| 11683 | HMDB0094189                      | DG(20:0/19:0/0:0)                           | C42H82O5    | 665.6091873 | No  |
| 11683 | HMDB0094190                      | DG(20:0/0:0/19:0)                           | C42H82O5    | 665.6091873 | No  |
| 11683 | HMDB0094191                      | DG(i-20:0/19:0/0:0)                         | C42H82O5    | 665.6091873 | No  |
| 11683 | HMDB0094192                      | DG(i-20:0/0:0/19:0)                         | C42H82O5    | 665.6091873 | No  |
| 11683 | HMDB0094193                      | DG(i-20:0/i-19:0/0:0)                       | C42H82O5    | 665.6091873 | No  |
| 11683 | HMDB0094194                      | DG(i-20:0/0:0/i-19:0)                       | C42H82O5    | 665.6091873 | No  |
| 11683 | HMDB0094195                      | DG(20:0/i-19:0/0:0)                         | C42H82O5    | 665.6091873 | No  |
| 11683 | HMDB0094196                      | DG(20:0/0:0/i-19:0)                         | C42H82O5    | 665.6091873 | No  |
| 11683 | HMDB0094331                      | DG(21:0/18:0/0:0)                           | C42H82O5    | 665.6091873 | No  |
| 11683 | HMDB0094332                      | DG(21:0/0:0/18:0)                           | C42H82O5    | 665.6091873 | No  |
| 11683 | HMDB0094333                      | DG(i-21:0/18:0/0:0)                         | C42H82O5    | 665.6091873 | No  |
| 11683 | HMDB0094334                      | DG(i-21:0/0:0/18:0)                         | C42H82O5    | 665.6091873 | No  |
| 11683 | HMDB0094335                      | DG(a-21:0/i-18:0/0:0)                       | C42H82O5    | 665.6091873 | No  |
| 11683 | HMDB0094336                      | DG(a-21:0/0:0/i-18:0)                       | C42H82O5    | 665.6091873 | No  |
| 11683 | HMDB0094337                      | DG(a-21:0/18:0/0:0)                         | C42H82O5    | 665.6091873 | No  |
| 11683 | HMDB0094338                      | DG(a-21:0/0:0/18:0)                         | C42H82O5    | 665.6091873 | No  |
| 11683 | HMDB0094339                      | DG(i-21:0/i-18:0/0:0)                       | C42H82O5    | 665.6091873 | No  |
| 11683 | HMDB0094340                      | DG(i-21:0/0:0/i-18:0)                       | C42H82O5    | 665.6091873 | No  |
| 11683 | HMDB0094341                      | DG(21:0/i-18:0/0:0)                         | C42H82O5    | 665.6091873 | No  |
| 11683 | HMDB0094342                      | DG(21:0/0:0/i-18:0)                         | C42H82O5    | 665.6091873 | No  |
| 11683 | HMDB0094462                      | DG(22:0/17:0/0:0)                           | C42H82O5    | 665.6091873 | No  |
| 11683 | HMDB0094463                      | DG(22:0/0:0/17:0)                           | C42H82O5    | 665.6091873 | No  |
| 11683 | HMDB0094464                      | DG(i-22:0/17:0/0:0)                         | C42H82O5    | 665.6091873 | No  |
| 11683 | HMDB0094465                      | DG(i-22:0/0:0/17:0)                         | C42H82O5    | 665.6091873 | No  |
| 11683 | HMDB0094466                      | DG(i-22:0/a-17:0/0:0)                       | C42H82O5    | 665.6091873 | No  |
| 11683 | HMDB0094467                      | DG(i-22:0/0:0/a-17:0)                       | C42H82O5    | 665.6091873 | No  |
| 11683 | HMDB0094468                      | DG(i-22:0/i-17:0/0:0)                       | C42H82O5    | 665.6091873 | No  |
| 11683 | HMDB0094469                      | DG(i-22:0/0:0/i-17:0)                       | C42H82O5    | 665.6091873 | No  |
| 11683 | HMDB0094470                      | DG(22:0/i-17:0/0:0)                         | C42H82O5    | 665.6091873 | No  |
| 11683 | HMDB0094471                      | DG(22:0/0:0/i-17:0)                         | C42H82O5    | 665.6091873 | No  |
| 11683 | HMDB0094472                      | DG(22:0/a-17:0/0:0)                         | C42H82O5    | 665.6091873 | No  |
| 11683 | HMDB0094473                      | DG(22:0/0:0/a-17:0)                         | C42H82O5    | 665.6091873 | No  |
| 11683 | HMDB0094540                      | DG(i-24:0/15:0/0:0)                         | C42H82O5    | 665.6091873 | No  |
| 11683 | HMDB0094541                      | DG(i-24:0/0:0/15:0)                         | C42H82O5    | 665.6091873 | No  |
| 11683 | HMDB0094542                      | DG(i-24:0/a-15:0/0:0)                       | C42H82O5    | 665.6091873 | No  |
| 11683 | HMDB0094543                      | DG(i-24:0/0:0/a-15:0)                       | C42H82O5    | 665.6091873 | No  |
| 11683 | HMDB0094544                      | DG(i-24:0/i-15:0/0:0)                       | C42H82O5    | 665.6091873 | No  |
| 11683 | HMDB0094545                      | DG(i-24:0/0:0/i-15:0)                       | C42H82O5    | 665.6091873 | No  |
| 11683 | HMDB0094596                      | DG(a-25:0/i-14:0/0:0)                       | C42H82O5    | 665.6091873 | No  |
| 11683 | HMDB0094597                      | DG(a-25:0/0:0/i-14:0)                       | C42H82O5    | 665.6091873 | No  |
| 11683 | HMDB0094598                      | DG(a-25:0/14:0/0:0)                         | C42H82O5    | 665.6091873 | No  |
| 11683 | HMDB0094599                      | DG(a-25:0/0:0/14:0)                         | C42H82O5    | 665.6091873 | No  |
| 11694 | HMDB0059796                      | Gluten exorphin C                           | C29H57N5O12 | 666.3932157 | No  |
| 11719 | HMDB0032199; C05821; CHEBI:28855 | Chymosin preparation, escherichia coli k-12 | C30H27N3O15 | 668.1366657 | No  |
| 11735 | HMDB0039436                      | Ginsenoside Rh6                             | C36H62O11   | 669.4212869 | No  |
| 11752 | HMDB0008885; C00350              | PE(14:1(9Z)/P-18:1(11Z))                    | C37H70NO7P  | 670.4790079 | No  |
| 11752 | HMDB0008886; C00350              | PE(14:1(9Z)/P-18:1(9Z))                     | C37H70NO7P  | 670.4790079 | No  |
| 11752 | HMDB0011402                      | PE(P-18:1(11Z)/14:1(9Z))                    | C37H70NO7P  | 670.4790079 | No  |
| 11752 | HMDB0011435                      | PE(P-18:1(9Z)/14:1(9Z))                     | C37H70NO7P  | 670.4790079 | No  |
| 11775 | HMDB0008852; C00350              | PE(14:0/P-18:1(11Z))                        | C37H72NO7P  | 672.4953768 | No  |
| 11775 | HMDB0008853; C00350              | PE(14:0/P-18:1(9Z))                         | C37H72NO7P  | 672.4953768 | No  |
| 11775 | HMDB0008884; C00350              | PE(14:1(9Z)/P-18:0)                         | C37H72NO7P  | 672.4953768 | No  |
| 11775 | HMDB0008982; C00350              | PE(16:1(9Z)/P-16:0)                         | C37H72NO7P  | 672.4953768 | No  |
| 11775 | HMDB0011339                      | PE(P-16:0/16:1(9Z))                         | C37H72NO7P  | 672.4953768 | No  |
| 11775 | HMDB0011369                      | PE(P-18:0/14:1(9Z))                         | C37H72NO7P  | 672.4953768 | No  |
| 11775 | HMDB0011401                      | PE(P-18:1(11Z)/14:0)                        | C37H72NO7P  | 672.4953768 | No  |
| 11775 | HMDB0011434                      | PE(P-18:1(9Z)/14:0)                         | C37H72NO7P  | 672.4953768 | No  |
| 11780 | HMDB0001081; C04886; CHEBI:17725 | (N-acetylneuraminosyl(a2-6)lactosamine)     | C25H42N2O19 | 673.2306473 | Yes |
| 11780 | HMDB0006581                      | 3-Sialyl-N-acetylactosamine                 | C25H42N2O19 | 673.2306473 | Yes |

|       |                           |                                                         |              |             |     |
|-------|---------------------------|---------------------------------------------------------|--------------|-------------|-----|
| 11780 | HMDB0006584               | 6-Sialyl-N-acetylactosamine                             | C25H42N2O19  | 673.2306473 | Yes |
| 11809 | HMDB0114783               | PA(14:0/20:0)                                           | C37H73O8P    | 675.4966566 | No  |
| 11809 | HMDB0114876               | PA(18:0/16:0)                                           | C37H73O8P    | 675.4966566 | No  |
| 11809 | HMDB0115061               | PA(20:0/14:0)                                           | C37H73O8P    | 675.4966566 | No  |
| 11809 | HMDB0115226               | PA(21:0/13:0)                                           | C37H73O8P    | 675.4966566 | No  |
| 11809 | HMDB0115238               | PA(22:0/12:0)                                           | C37H73O8P    | 675.4966566 | No  |
| 11809 | HMDB0115622               | PA(10:0/i-24:0)                                         | C37H73O8P    | 675.4966566 | No  |
| 11809 | HMDB0115636               | PA(20:0/i-14:0)                                         | C37H73O8P    | 675.4966566 | No  |
| 11809 | HMDB0115646               | PA(21:0/a-13:0)                                         | C37H73O8P    | 675.4966566 | No  |
| 11809 | HMDB0115652               | PA(21:0/i-13:0)                                         | C37H73O8P    | 675.4966566 | No  |
| 11809 | HMDB0115668               | PA(22:0/i-12:0)                                         | C37H73O8P    | 675.4966566 | No  |
| 11809 | HMDB0115701               | PA(a-13:0/a-21:0)                                       | C37H73O8P    | 675.4966566 | No  |
| 11809 | HMDB0115712               | PA(a-13:0/i-21:0)                                       | C37H73O8P    | 675.4966566 | No  |
| 11809 | HMDB0115717               | PA(a-21:0/13:0)                                         | C37H73O8P    | 675.4966566 | No  |
| 11809 | HMDB0115728               | PA(a-21:0/a-13:0)                                       | C37H73O8P    | 675.4966566 | No  |
| 11809 | HMDB0115734               | PA(a-21:0/i-13:0)                                       | C37H73O8P    | 675.4966566 | No  |
| 11809 | HMDB0115791               | PA(i-12:0/i-22:0)                                       | C37H73O8P    | 675.4966566 | No  |
| 11809 | HMDB0115797               | PA(i-13:0/a-21:0)                                       | C37H73O8P    | 675.4966566 | No  |
| 11809 | HMDB0115808               | PA(i-13:0/i-21:0)                                       | C37H73O8P    | 675.4966566 | No  |
| 11809 | HMDB0115833               | PA(i-20:0/14:0)                                         | C37H73O8P    | 675.4966566 | No  |
| 11809 | HMDB0115850               | PA(i-20:0/i-14:0)                                       | C37H73O8P    | 675.4966566 | No  |
| 11809 | HMDB0115862               | PA(i-21:0/13:0)                                         | C37H73O8P    | 675.4966566 | No  |
| 11809 | HMDB0115873               | PA(i-21:0/a-13:0)                                       | C37H73O8P    | 675.4966566 | No  |
| 11809 | HMDB0115879               | PA(i-21:0/i-13:0)                                       | C37H73O8P    | 675.4966566 | No  |
| 11809 | HMDB0115891               | PA(i-22:0/12:0)                                         | C37H73O8P    | 675.4966566 | No  |
| 11809 | HMDB0115908               | PA(i-22:0/i-12:0)                                       | C37H73O8P    | 675.4966566 | No  |
| 11809 | HMDB0115920               | PA(i-24:0/10:0)                                         | C37H73O8P    | 675.4966566 | No  |
| 11831 | HMDB0060814               | Descladinose roxithromycin                              | C33H62N2O12  | 677.420571  | No  |
| 11842 | HMDB0015616; CHEBI:494996 | Telaprevir                                              | C36H53N7O6   | 678.4002131 | No  |
| 11845 | HMDB0012330               | PS(14:0/14:0)                                           | C34H66NO10P  | 678.4339231 | No  |
| 11954 | HMDB0008829; C00350       | PE(14:0/18:2(9Z,12Z))                                   | C37H70NO8P   | 686.4748595 | No  |
| 11954 | HMDB0008860; C00350       | PE(14:1(9Z)/18:1(11Z))                                  | C37H70NO8P   | 686.4748595 | No  |
| 11954 | HMDB0008861; C00350       | PE(14:1(9Z)/18:1(9Z))                                   | C37H70NO8P   | 686.4748595 | No  |
| 11954 | HMDB0008957; C00350       | PE(16:1(9Z)/16:1(9Z))                                   | C37H70NO8P   | 686.4748595 | No  |
| 11954 | HMDB0009020; C00350       | PE(18:1(11Z)/14:1(9Z))                                  | C37H70NO8P   | 686.4748595 | No  |
| 11954 | HMDB0009053; C00350       | PE(18:1(9Z)/14:1(9Z))                                   | C37H70NO8P   | 686.4748595 | No  |
| 11954 | HMDB0009085; C00350       | PE(18:2(9Z,12Z)/14:0)                                   | C37H70NO8P   | 686.4748595 | No  |
| 11954 | HMDB0113844               | PE-NMe2(14:1(9Z)/16:1(9Z))                              | C37H70NO8P   | 686.4748595 | No  |
| 11954 | HMDB0113963               | PE-NMe2(16:1(9Z)/14:1(9Z))                              | C37H70NO8P   | 686.4748595 | No  |
| 11982 | HMDB0007901; C00157       | PC(14:1(9Z)/15:0)                                       | C37H72NO8P   | 688.4914723 | No  |
| 11982 | HMDB0007933; C00157       | PC(15:0/14:1(9Z))                                       | C37H72NO8P   | 688.4914723 | No  |
| 11982 | HMDB0008827; C00350       | PE(14:0/18:1(11Z))                                      | C37H72NO8P   | 688.4914723 | No  |
| 11982 | HMDB0008828; C00350       | PE(14:0/18:1(9Z))                                       | C37H72NO8P   | 688.4914723 | No  |
| 11982 | HMDB0008859; C00350       | PE(14:1(9Z)/18:0)                                       | C37H72NO8P   | 688.4914723 | No  |
| 11982 | HMDB0008924; C00350       | PE(16:0/16:1(9Z))                                       | C37H72NO8P   | 688.4914723 | No  |
| 11982 | HMDB0008956; C00350       | PE(16:1(9Z)/16:0)                                       | C37H72NO8P   | 688.4914723 | No  |
| 11982 | HMDB0008987; C00350       | PE(18:0/14:1(9Z))                                       | C37H72NO8P   | 688.4914723 | No  |
| 11982 | HMDB0009019; C00350       | PE(18:1(11Z)/14:0)                                      | C37H72NO8P   | 688.4914723 | No  |
| 11982 | HMDB0009052; C00350       | PE(18:1(9Z)/14:0)                                       | C37H72NO8P   | 688.4914723 | No  |
| 11982 | HMDB0112945               | PE-NMe(15:0/16:1(9Z))                                   | C37H72NO8P   | 688.4914723 | No  |
| 11982 | HMDB0113063               | PE-NMe(16:1(9Z)/15:0)                                   | C37H72NO8P   | 688.4914723 | No  |
| 11982 | HMDB0113842               | PE-NMe2(14:0/16:1(9Z))                                  | C37H72NO8P   | 688.4914723 | No  |
| 11982 | HMDB0113843               | PE-NMe2(14:1(9Z)/16:0)                                  | C37H72NO8P   | 688.4914723 | No  |
| 11982 | HMDB0113941               | PE-NMe2(16:0/14:1(9Z))                                  | C37H72NO8P   | 688.4914723 | No  |
| 11982 | HMDB0113962               | PE-NMe2(16:1(9Z)/14:0)                                  | C37H72NO8P   | 688.4914723 | No  |
| 12019 | HMDB0129099               | 4-[(2-[[4-({8-[2-(acetyloxy)propan-2-yl]-2-oxo-2H,8H,9H | C31H39N3O13S | 692.2148113 | No  |
| 12026 | HMDB0030492               | Spirolide B                                             | C42H63NO7    | 692.4514382 | No  |
| 12026 | HMDB0112273               | PS(14:0/15:0)                                           | C35H68NO10P  | 692.4514382 | No  |
| 12026 | HMDB0112320               | PS(15:0/14:0)                                           | C35H68NO10P  | 692.4514382 | No  |
| 12039 | HMDB0114791               | PA(14:0/22:5(4Z,7Z,10Z,13Z,16Z))                        | C39H67O8P    | 693.4510422 | No  |
| 12039 | HMDB0114806               | PA(14:1(9Z)/22:4(7Z,10Z,13Z,16Z))                       | C39H67O8P    | 693.4510422 | No  |

|       |                     |                                   |            |             |    |
|-------|---------------------|-----------------------------------|------------|-------------|----|
| 12039 | HMDB0114842         | PA(16:0/20:5(5Z,8Z,11Z,14Z,17Z))  | C39H67O8P  | 693.4510422 | No |
| 12039 | HMDB0114861         | PA(16:1(9Z)/20:4(5Z,8Z,11Z,14Z))  | C39H67O8P  | 693.4510422 | No |
| 12039 | HMDB0114862         | PA(16:1(9Z)/20:4(8Z,11Z,14Z,17Z)) | C39H67O8P  | 693.4510422 | No |
| 12039 | HMDB0114905         | PA(18:1(11Z)/18:4(6Z,9Z,12Z,15Z)) | C39H67O8P  | 693.4510422 | No |
| 12039 | HMDB0114930         | PA(18:1(9Z)/18:4(6Z,9Z,12Z,15Z))  | C39H67O8P  | 693.4510422 | No |
| 12039 | HMDB0114955         | PA(18:2(9Z,12Z)/18:3(6Z,9Z,12Z))  | C39H67O8P  | 693.4510422 | No |
| 12039 | HMDB0114956         | PA(18:2(9Z,12Z)/18:3(9Z,12Z,15Z)) | C39H67O8P  | 693.4510422 | No |
| 12039 | HMDB0114981         | PA(18:3(6Z,9Z,12Z)/18:2(9Z,12Z))  | C39H67O8P  | 693.4510422 | No |
| 12039 | HMDB0115008         | PA(18:3(9Z,12Z,15Z)/18:2(9Z,12Z)) | C39H67O8P  | 693.4510422 | No |
| 12039 | HMDB0115033         | PA(18:4(6Z,9Z,12Z,15Z)/18:1(11Z)) | C39H67O8P  | 693.4510422 | No |
| 12039 | HMDB0115034         | PA(18:4(6Z,9Z,12Z,15Z)/18:1(9Z))  | C39H67O8P  | 693.4510422 | No |
| 12039 | HMDB0115148         | PA(20:4(5Z,8Z,11Z,14Z)/16:1(9Z))  | C39H67O8P  | 693.4510422 | No |
| 12039 | HMDB0115175         | PA(20:4(8Z,11Z,14Z,17Z)/16:1(9Z)) | C39H67O8P  | 693.4510422 | No |
| 12039 | HMDB0115201         | PA(20:5(5Z,8Z,11Z,14Z,17Z)/16:0)  | C39H67O8P  | 693.4510422 | No |
| 12039 | HMDB0115324         | PA(22:4(7Z,10Z,13Z,16Z)/14:1(9Z)) | C39H67O8P  | 693.4510422 | No |
| 12039 | HMDB0115349         | PA(22:5(4Z,7Z,10Z,13Z,16Z)/14:0)  | C39H67O8P  | 693.4510422 | No |
| 12039 | HMDB0116700         | PA(14:0/22:5(7Z,10Z,13Z,16Z,19Z)) | C39H67O8P  | 693.4510422 | No |
| 12039 | HMDB0116708         | PA(22:5(7Z,10Z,13Z,16Z,19Z)/14:0) | C39H67O8P  | 693.4510422 | No |
| 12049 | HMDB0009213; C00350 | PE(18:4(6Z,9Z,12Z,15Z)/P-16:0)    | C39H70NO7P | 694.4811321 | No |
| 12049 | HMDB0011346         | PE(P-16:0/18:4(6Z,9Z,12Z,15Z))    | C39H70NO7P | 694.4811321 | No |
| 12086 | HMDB0114805         | PA(14:1(9Z)/22:2(13Z,16Z))        | C39H71O8P  | 697.4796911 | No |
| 12086 | HMDB0114840         | PA(16:0/20:3(5Z,8Z,11Z))          | C39H71O8P  | 697.4796911 | No |
| 12086 | HMDB0114878         | PA(18:0/18:3(6Z,9Z,12Z))          | C39H71O8P  | 697.4796911 | No |
| 12086 | HMDB0114879         | PA(18:0/18:3(9Z,12Z,15Z))         | C39H71O8P  | 697.4796911 | No |
| 12086 | HMDB0114902         | PA(18:1(11Z)/18:2(9Z,12Z))        | C39H71O8P  | 697.4796911 | No |
| 12086 | HMDB0114927         | PA(18:1(9Z)/18:2(9Z,12Z))         | C39H71O8P  | 697.4796911 | No |
| 12086 | HMDB0114952         | PA(18:2(9Z,12Z)/18:1(11Z))        | C39H71O8P  | 697.4796911 | No |
| 12086 | HMDB0114953         | PA(18:2(9Z,12Z)/18:1(9Z))         | C39H71O8P  | 697.4796911 | No |
| 12086 | HMDB0114978         | PA(18:3(6Z,9Z,12Z)/18:0)          | C39H71O8P  | 697.4796911 | No |
| 12086 | HMDB0115005         | PA(18:3(9Z,12Z,15Z)/18:0)         | C39H71O8P  | 697.4796911 | No |
| 12086 | HMDB0115121         | PA(20:3(5Z,8Z,11Z)/16:0)          | C39H71O8P  | 697.4796911 | No |
| 12086 | HMDB0115297         | PA(22:2(13Z,16Z)/14:1(9Z))        | C39H71O8P  | 697.4796911 | No |
| 12086 | HMDB0115511         | PA(16:0/20:3(8Z,11Z,14Z))         | C39H71O8P  | 697.4796911 | No |
| 12086 | HMDB0115512         | PA(16:1(9Z)/20:2(11Z,14Z))        | C39H71O8P  | 697.4796911 | No |
| 12086 | HMDB0115536         | PA(20:2(11Z,14Z)/16:1(9Z))        | C39H71O8P  | 697.4796911 | No |
| 12086 | HMDB0115564         | PA(20:3(8Z,11Z,14Z)/16:0)         | C39H71O8P  | 697.4796911 | No |
| 12124 | HMDB0007903; C00157 | PC(14:1(9Z)/16:1(9Z))             | C38H72NO8P | 700.4902987 | No |
| 12124 | HMDB0007999; C00157 | PC(16:1(9Z)/14:1(9Z))             | C38H72NO8P | 700.4902987 | No |
| 12124 | HMDB0008895; C00350 | PE(15:0/18:2(9Z,12Z))             | C38H72NO8P | 700.4902987 | No |
| 12124 | HMDB0009087; C00350 | PE(18:2(9Z,12Z)/15:0)             | C38H72NO8P | 700.4902987 | No |
| 12124 | HMDB0112946         | PE-NMe(14:1(9Z)/18:1(9Z))         | C38H72NO8P | 700.4902987 | No |
| 12124 | HMDB0112947         | PE-NMe(14:1(9Z)/18:1(11Z))        | C38H72NO8P | 700.4902987 | No |
| 12124 | HMDB0112948         | PE-NMe(16:1(9Z)/16:1(9Z))         | C38H72NO8P | 700.4902987 | No |
| 12124 | HMDB0112979         | PE-NMe(14:0/18:2(9Z,12Z))         | C38H72NO8P | 700.4902987 | No |
| 12124 | HMDB0113111         | PE-NMe(18:1(11Z)/14:1(9Z))        | C38H72NO8P | 700.4902987 | No |
| 12124 | HMDB0113138         | PE-NMe(18:1(9Z)/14:1(9Z))         | C38H72NO8P | 700.4902987 | No |
| 12124 | HMDB0113164         | PE-NMe(18:2(9Z,12Z)/14:0)         | C38H72NO8P | 700.4902987 | No |
| 12152 | HMDB0007870; C00157 | PC(14:0/16:1(9Z))                 | C38H74NO8P | 702.5066838 | No |
| 12152 | HMDB0007902; C00157 | PC(14:1(9Z)/16:0)                 | C38H74NO8P | 702.5066838 | No |
| 12152 | HMDB0007966; C00157 | PC(16:0/14:1(9Z))                 | C38H74NO8P | 702.5066838 | No |
| 12152 | HMDB0007998; C00157 | PC(16:1(9Z)/14:0)                 | C38H74NO8P | 702.5066838 | No |
| 12152 | HMDB0008893; C00350 | PE(15:0/18:1(11Z))                | C38H74NO8P | 702.5066838 | No |
| 12152 | HMDB0008894; C00350 | PE(15:0/18:1(9Z))                 | C38H74NO8P | 702.5066838 | No |
| 12152 | HMDB0009021; C00350 | PE(18:1(11Z)/15:0)                | C38H74NO8P | 702.5066838 | No |
| 12152 | HMDB0009054; C00350 | PE(18:1(9Z)/15:0)                 | C38H74NO8P | 702.5066838 | No |
| 12152 | HMDB0112949         | PE-NMe(16:0/16:1(9Z))             | C38H74NO8P | 702.5066838 | No |
| 12152 | HMDB0112950         | PE-NMe(14:0/18:1(9Z))             | C38H74NO8P | 702.5066838 | No |
| 12152 | HMDB0112951         | PE-NMe(14:0/18:1(11Z))            | C38H74NO8P | 702.5066838 | No |
| 12152 | HMDB0112952         | PE-NMe(14:1(9Z)/18:0)             | C38H74NO8P | 702.5066838 | No |
| 12152 | HMDB0113064         | PE-NMe(16:1(9Z)/16:0)             | C38H74NO8P | 702.5066838 | No |
| 12152 | HMDB0113085         | PE-NMe(18:0/14:1(9Z))             | C38H74NO8P | 702.5066838 | No |



|       |                                  |                                            |              |             |    |
|-------|----------------------------------|--------------------------------------------|--------------|-------------|----|
| 12152 | HMDB0113110                      | PE-NMe(18:1(11Z)/14:0)                     | C38H74NO8P   | 702.5066838 | No |
| 12152 | HMDB0113137                      | PE-NMe(18:1(9Z)/14:0)                      | C38H74NO8P   | 702.5066838 | No |
| 12152 | HMDB0113846                      | PE-NMe2(15:0/16:1(9Z))                     | C38H74NO8P   | 702.5066838 | No |
| 12152 | HMDB0113964                      | PE-NMe2(16:1(9Z)/15:0)                     | C38H74NO8P   | 702.5066838 | No |
| 12190 | HMDB0114828                      | PA(15:0/22:5(4Z,7Z,10Z,13Z,16Z))           | C40H69O8P    | 707.4664437 | No |
| 12190 | HMDB0114829                      | PA(15:0/22:5(7Z,10Z,13Z,16Z,19Z))          | C40H69O8P    | 707.4664437 | No |
| 12190 | HMDB0115351                      | PA(22:5(4Z,7Z,10Z,13Z,16Z)/15:0)           | C40H69O8P    | 707.4664437 | No |
| 12190 | HMDB0115377                      | PA(22:5(7Z,10Z,13Z,16Z,19Z)/15:0)          | C40H69O8P    | 707.4664437 | No |
| 12260 | HMDB0032677                      | Soyacerebroside I                          | C40H75NO9    | 712.5375216 | No |
| 12286 | HMDB0007897; C00157              | PC(14:0/P-18:1(11Z))                       | C40H78NO7P   | 714.5455341 | No |
| 12286 | HMDB0007898; C00157              | PC(14:0/P-18:1(9Z))                        | C40H78NO7P   | 714.5455341 | No |
| 12286 | HMDB0007929; C00157              | PC(14:1(9Z)/P-18:0)                        | C40H78NO7P   | 714.5455341 | No |
| 12286 | HMDB0008027; C00157              | PC(16:1(9Z)/P-16:0)                        | C40H78NO7P   | 714.5455341 | No |
| 12286 | HMDB0011207                      | PC(P-16:0/16:1(9Z))                        | C40H78NO7P   | 714.5455341 | No |
| 12286 | HMDB0011237                      | PC(P-18:0/14:1(9Z))                        | C40H78NO7P   | 714.5455341 | No |
| 12286 | HMDB0011269                      | PC(P-18:1(11Z)/14:0)                       | C40H78NO7P   | 714.5455341 | No |
| 12286 | HMDB0011302                      | PC(P-18:1(9Z)/14:0)                        | C40H78NO7P   | 714.5455341 | No |
| 12286 | HMDB0013411                      | PC(o-16:1(9Z)/16:1(9Z))                    | C40H78NO7P   | 714.5455341 | No |
| 12320 | HMDB0010586                      | PG(16:1(9Z)/16:1(9Z))                      | C38H71O10P   | 717.4708783 | No |
| 12345 | HMDB0014646; C07240              | Ritonavir                                  | C37H48N6O5S2 | 719.302946  | No |
| 12350 | HMDB0010571                      | PG(16:0/16:1(9Z))                          | C38H73O10P   | 719.4862273 | No |
| 12350 | HMDB0010585                      | PG(16:1(9Z)/16:0)                          | C38H73O10P   | 719.4862273 | No |
| 12361 | HMDB0029371                      | gamma2-Solamarine                          | C39H63NO11   | 720.4338649 | No |
| 12361 | HMDB0033696                      | beta-Solanine                              | C39H63NO11   | 720.4338649 | No |
| 12371 | HMDB0001094; C04146; CHEBI:16275 | Octaprenyl diphosphate                     | C40H68O7P2   | 721.4356235 | No |
| 12371 | HMDB0003023; C03427; CHEBI:17090 | Prephytoene diphosphate                    | C40H68O7P2   | 721.4356235 | No |
| 12395 | HMDB0007587                      | DG(20:5(5Z,8Z,11Z,14Z,17Z)/24:1(15Z)/0:0)  | C47H80O5     | 723.5959865 | No |
| 12395 | HMDB0007614                      | DG(22:0/22:6(4Z,7Z,10Z,13Z,16Z,19Z)/0:0)   | C47H80O5     | 723.5959865 | No |
| 12395 | HMDB0007641                      | DG(22:1(13Z)/22:5(4Z,7Z,10Z,13Z,16Z)/0:0)  | C47H80O5     | 723.5959865 | No |
| 12395 | HMDB0007642                      | DG(22:1(13Z)/22:5(7Z,10Z,13Z,16Z,19Z)/0:0) | C47H80O5     | 723.5959865 | No |
| 12395 | HMDB0007669                      | DG(22:2(13Z,16Z)/22:4(7Z,10Z,13Z,16Z)/0:0) | C47H80O5     | 723.5959865 | No |
| 12395 | HMDB0007697                      | DG(22:4(7Z,10Z,13Z,16Z)/22:2(13Z,16Z)/0:0) | C47H80O5     | 723.5959865 | No |
| 12395 | HMDB0007725                      | DG(22:5(4Z,7Z,10Z,13Z,16Z)/22:1(13Z)/0:0)  | C47H80O5     | 723.5959865 | No |
| 12395 | HMDB0007754                      | DG(22:5(7Z,10Z,13Z,16Z,19Z)/22:1(13Z)/0:0) | C47H80O5     | 723.5959865 | No |
| 12395 | HMDB0007782                      | DG(22:6(4Z,7Z,10Z,13Z,16Z,19Z)/22:0/0:0)   | C47H80O5     | 723.5959865 | No |
| 12395 | HMDB0007839                      | DG(24:1(15Z)/20:5(5Z,8Z,11Z,14Z,17Z)/0:0)  | C47H80O5     | 723.5959865 | No |
| 12395 | HMDB0056110                      | DG(22:0/0:0/22:6n3)                        | C47H80O5     | 723.5959865 | No |
| 12395 | HMDB0056260                      | DG(22:1n9/0:0/22:5n6)                      | C47H80O5     | 723.5959865 | No |
| 12395 | HMDB0056265                      | DG(22:1n9/0:0/22:5n3)                      | C47H80O5     | 723.5959865 | No |
| 12395 | HMDB0056279                      | DG(24:1n9/0:0/20:5n3)                      | C47H80O5     | 723.5959865 | No |
| 12395 | HMDB0056343                      | DG(22:2n6/0:0/22:4n6)                      | C47H80O5     | 723.5959865 | No |
| 12405 | HMDB0007877; C00157              | PC(14:0/18:4(6Z,9Z,12Z,15Z))               | C40H72NO8P   | 724.490768  | No |
| 12405 | HMDB0007908; C00157              | PC(14:1(9Z)/18:3(6Z,9Z,12Z))               | C40H72NO8P   | 724.490768  | No |
| 12405 | HMDB0007909; C00157              | PC(14:1(9Z)/18:3(9Z,12Z,15Z))              | C40H72NO8P   | 724.490768  | No |
| 12405 | HMDB0008164; C00157              | PC(18:3(6Z,9Z,12Z)/14:1(9Z))               | C40H72NO8P   | 724.490768  | No |
| 12405 | HMDB0008197; C00157              | PC(18:3(9Z,12Z,15Z)/14:1(9Z))              | C40H72NO8P   | 724.490768  | No |
| 12405 | HMDB0008229; C00157              | PC(18:4(6Z,9Z,12Z,15Z)/14:0)               | C40H72NO8P   | 724.490768  | No |
| 12405 | HMDB0008904; C00350              | PE(15:0/20:4(5Z,8Z,11Z,14Z))               | C40H72NO8P   | 724.490768  | No |
| 12405 | HMDB0008905; C00350              | PE(15:0/20:4(8Z,11Z,14Z,17Z))              | C40H72NO8P   | 724.490768  | No |
| 12405 | HMDB0009384; C00350              | PE(20:4(5Z,8Z,11Z,14Z)/15:0)               | C40H72NO8P   | 724.490768  | No |
| 12405 | HMDB0009417; C00350              | PE(20:4(8Z,11Z,14Z,17Z)/15:0)              | C40H72NO8P   | 724.490768  | No |
| 12405 | HMDB0112987                      | PE-NMe(14:0/20:4(5Z,8Z,11Z,14Z))           | C40H72NO8P   | 724.490768  | No |
| 12405 | HMDB0112988                      | PE-NMe(14:0/20:4(8Z,11Z,14Z,17Z))          | C40H72NO8P   | 724.490768  | No |
| 12405 | HMDB0113005                      | PE-NMe(14:1(9Z)/20:3(5Z,8Z,11Z))           | C40H72NO8P   | 724.490768  | No |
| 12405 | HMDB0113006                      | PE-NMe(14:1(9Z)/20:3(8Z,11Z,14Z))          | C40H72NO8P   | 724.490768  | No |
| 12405 | HMDB0113045                      | PE-NMe(16:0/18:4(6Z,9Z,12Z,15Z))           | C40H72NO8P   | 724.490768  | No |
| 12405 | HMDB0113066                      | PE-NMe(16:1(9Z)/18:3(6Z,9Z,12Z))           | C40H72NO8P   | 724.490768  | No |
| 12405 | HMDB0113067                      | PE-NMe(16:1(9Z)/18:3(9Z,12Z,15Z))          | C40H72NO8P   | 724.490768  | No |
| 12405 | HMDB0113197                      | PE-NMe(18:3(6Z,9Z,12Z)/16:1(9Z))           | C40H72NO8P   | 724.490768  | No |
| 12405 | HMDB0113225                      | PE-NMe(18:3(9Z,12Z,15Z)/16:1(9Z))          | C40H72NO8P   | 724.490768  | No |
| 12405 | HMDB0113253                      | PE-NMe(18:4(6Z,9Z,12Z,15Z)/16:0)           | C40H72NO8P   | 724.490768  | No |

|       |                     |                                                       |             |             |    |
|-------|---------------------|-------------------------------------------------------|-------------|-------------|----|
| 12405 | HMDB0113367         | PE-NMe(20:3(5Z,8Z,11Z)/14:1(9Z))                      | C40H72NO8P  | 724.490768  | No |
| 12405 | HMDB0113395         | PE-NMe(20:3(8Z,11Z,14Z)/14:1(9Z))                     | C40H72NO8P  | 724.490768  | No |
| 12405 | HMDB0113422         | PE-NMe(20:4(5Z,8Z,11Z,14Z)/14:0)                      | C40H72NO8P  | 724.490768  | No |
| 12405 | HMDB0113450         | PE-NMe(20:4(8Z,11Z,14Z,17Z)/14:0)                     | C40H72NO8P  | 724.490768  | No |
| 12405 | HMDB0113923         | PE-NMe2(15:0/18:4(6Z,9Z,12Z,15Z))                     | C40H72NO8P  | 724.490768  | No |
| 12405 | HMDB0114154         | PE-NMe2(18:4(6Z,9Z,12Z,15Z)/15:0)                     | C40H72NO8P  | 724.490768  | No |
| 12463 | HMDB0125179         | ((6-([2-([2-(3,4-dihydroxyphenyl)-7-hydroxy-5-oxo-5H- | C34H35O18   | 730.1753475 | No |
| 12488 | HMDB0008880; C00350 | PE(14:1(9Z)/22:6(4Z,7Z,10Z,13Z,16Z,19Z))              | C41H68NO8P  | 732.4611632 | No |
| 12488 | HMDB0009129; C00350 | PE(18:3(6Z,9Z,12Z)/18:4(6Z,9Z,12Z,15Z))               | C41H68NO8P  | 732.4611632 | No |
| 12488 | HMDB0009162; C00350 | PE(18:3(9Z,12Z,15Z)/18:4(6Z,9Z,12Z,15Z))              | C41H68NO8P  | 732.4611632 | No |
| 12488 | HMDB0009193; C00350 | PE(18:4(6Z,9Z,12Z,15Z)/18:3(6Z,9Z,12Z))               | C41H68NO8P  | 732.4611632 | No |
| 12488 | HMDB0009194; C00350 | PE(18:4(6Z,9Z,12Z,15Z)/18:3(9Z,12Z,15Z))              | C41H68NO8P  | 732.4611632 | No |
| 12488 | HMDB0009680; C00350 | PE(22:6(4Z,7Z,10Z,13Z,16Z,19Z)/14:1(9Z))              | C41H68NO8P  | 732.4611632 | No |
| 12489 | HMDB0012335         | PS(14:0/18:1(9Z))                                     | C38H72NO10P | 732.4827831 | No |
| 12489 | HMDB0012345         | PS(14:1(9Z)/18:0)                                     | C38H72NO10P | 732.4827831 | No |
| 12489 | HMDB0012355         | PS(16:0/16:1(9Z))                                     | C38H72NO10P | 732.4827831 | No |
| 12489 | HMDB0012365         | PS(16:1(9Z)/16:0)                                     | C38H72NO10P | 732.4827831 | No |
| 12489 | HMDB0012375         | PS(18:0/14:1(9Z))                                     | C38H72NO10P | 732.4827831 | No |
| 12489 | HMDB0012385         | PS(18:1(9Z)/14:0)                                     | C38H72NO10P | 732.4827831 | No |
| 12489 | HMDB0112266         | PS(14:0/18:1(11Z))                                    | C38H72NO10P | 732.4827831 | No |
| 12489 | HMDB0112269         | PS(18:1(11Z)/14:0)                                    | C38H72NO10P | 732.4827831 | No |
| 12510 | HMDB0008847; C00350 | PE(14:0/22:6(4Z,7Z,10Z,13Z,16Z,19Z))                  | C41H70NO8P  | 734.4763653 | No |
| 12510 | HMDB0008878; C00350 | PE(14:1(9Z)/22:5(4Z,7Z,10Z,13Z,16Z))                  | C41H70NO8P  | 734.4763653 | No |
| 12510 | HMDB0008879; C00350 | PE(14:1(9Z)/22:5(7Z,10Z,13Z,16Z,19Z))                 | C41H70NO8P  | 734.4763653 | No |
| 12510 | HMDB0008972; C00350 | PE(16:1(9Z)/20:5(5Z,8Z,11Z,14Z,17Z))                  | C41H70NO8P  | 734.4763653 | No |
| 12510 | HMDB0009096; C00350 | PE(18:2(9Z,12Z)/18:4(6Z,9Z,12Z,15Z))                  | C41H70NO8P  | 734.4763653 | No |
| 12510 | HMDB0009127; C00350 | PE(18:3(6Z,9Z,12Z)/18:3(6Z,9Z,12Z))                   | C41H70NO8P  | 734.4763653 | No |
| 12510 | HMDB0009128; C00350 | PE(18:3(6Z,9Z,12Z)/18:3(9Z,12Z,15Z))                  | C41H70NO8P  | 734.4763653 | No |
| 12510 | HMDB0009160; C00350 | PE(18:3(9Z,12Z,15Z)/18:3(6Z,9Z,12Z))                  | C41H70NO8P  | 734.4763653 | No |
| 12510 | HMDB0009161; C00350 | PE(18:3(9Z,12Z,15Z)/18:3(9Z,12Z,15Z))                 | C41H70NO8P  | 734.4763653 | No |
| 12510 | HMDB0009192; C00350 | PE(18:4(6Z,9Z,12Z,15Z)/18:2(9Z,12Z))                  | C41H70NO8P  | 734.4763653 | No |
| 12510 | HMDB0009452; C00350 | PE(20:5(5Z,8Z,11Z,14Z,17Z)/16:1(9Z))                  | C41H70NO8P  | 734.4763653 | No |
| 12510 | HMDB0009614; C00350 | PE(22:5(4Z,7Z,10Z,13Z,16Z)/14:1(9Z))                  | C41H70NO8P  | 734.4763653 | No |
| 12510 | HMDB0009647; C00350 | PE(22:5(7Z,10Z,13Z,16Z,19Z)/14:1(9Z))                 | C41H70NO8P  | 734.4763653 | No |
| 12510 | HMDB0009679; C00350 | PE(22:6(4Z,7Z,10Z,13Z,16Z,19Z)/14:0)                  | C41H70NO8P  | 734.4763653 | No |
| 12510 | HMDB0113909         | PE-NMe2(14:1(9Z)/20:5(5Z,8Z,11Z,14Z,17Z))             | C41H70NO8P  | 734.4763653 | No |
| 12510 | HMDB0114382         | PE-NMe2(20:5(5Z,8Z,11Z,14Z,17Z)/14:1(9Z))             | C41H70NO8P  | 734.4763653 | No |
| 12512 | HMDB0000614; C02737 | PS(16:0/16:0)                                         | C38H74NO10P | 734.4959492 | No |
| 12512 | HMDB0012334         | PS(14:0/18:0)                                         | C38H74NO10P | 734.4959492 | No |
| 12512 | HMDB0012374         | PS(18:0/14:0)                                         | C38H74NO10P | 734.4959492 | No |
| 12537 | HMDB0040991; C16302 | Ternatin                                              | C37H67N7O8  | 736.4968654 | No |
| 12571 | HMDB0115051         | PA(18:4(6Z,9Z,12Z,15Z)/22:6(4Z,7Z,10Z,13Z,16Z,19Z))   | C43H65O8P   | 739.4368173 | No |
| 12571 | HMDB0115214         | PA(20:5(5Z,8Z,11Z,14Z,17Z)/20:5(5Z,8Z,11Z,14Z,17Z))   | C43H65O8P   | 739.4368173 | No |
| 12571 | HMDB0115412         | PA(22:6(4Z,7Z,10Z,13Z,16Z,19Z)/18:4(6Z,9Z,12Z,15Z))   | C43H65O8P   | 739.4368173 | No |
| 12580 | HMDB0038822         | Malvidin 3-(6-malonylglucoside) 5-glucoside           | C32H37O20   | 740.178579  | No |
| 12586 | HMDB0007941; C00157 | PC(15:0/18:3(6Z,9Z,12Z))                              | C41H76NO8P  | 740.5231574 | No |
| 12586 | HMDB0007942; C00157 | PC(15:0/18:3(9Z,12Z,15Z))                             | C41H76NO8P  | 740.5231574 | No |
| 12586 | HMDB0008165; C00157 | PC(18:3(6Z,9Z,12Z)/15:0)                              | C41H76NO8P  | 740.5231574 | No |
| 12586 | HMDB0008198; C00157 | PC(18:3(9Z,12Z,15Z)/15:0)                             | C41H76NO8P  | 740.5231574 | No |
| 12586 | HMDB0008876; C00350 | PE(14:1(9Z)/22:2(13Z,16Z))                            | C41H76NO8P  | 740.5231574 | No |
| 12586 | HMDB0008935; C00350 | PE(16:0/20:3(5Z,8Z,11Z))                              | C41H76NO8P  | 740.5231574 | No |
| 12586 | HMDB0008936; C00350 | PE(16:0/20:3(8Z,11Z,14Z))                             | C41H76NO8P  | 740.5231574 | No |
| 12586 | HMDB0008967; C00350 | PE(16:1(9Z)/20:2(11Z,14Z))                            | C41H76NO8P  | 740.5231574 | No |
| 12586 | HMDB0008995; C00350 | PE(18:0/18:3(6Z,9Z,12Z))                              | C41H76NO8P  | 740.5231574 | No |
| 12586 | HMDB0008996; C00350 | PE(18:0/18:3(9Z,12Z,15Z))                             | C41H76NO8P  | 740.5231574 | No |
| 12586 | HMDB0009027; C00350 | PE(18:1(11Z)/18:2(9Z,12Z))                            | C41H76NO8P  | 740.5231574 | No |
| 12586 | HMDB0009060; C00350 | PE(18:1(9Z)/18:2(9Z,12Z))                             | C41H76NO8P  | 740.5231574 | No |
| 12586 | HMDB0009091; C00350 | PE(18:2(9Z,12Z)/18:1(11Z))                            | C41H76NO8P  | 740.5231574 | No |
| 12586 | HMDB0009092; C00350 | PE(18:2(9Z,12Z)/18:1(9Z))                             | C41H76NO8P  | 740.5231574 | No |
| 12586 | HMDB0009123; C00350 | PE(18:3(6Z,9Z,12Z)/18:0)                              | C41H76NO8P  | 740.5231574 | No |
| 12586 | HMDB0009156; C00350 | PE(18:3(9Z,12Z,15Z)/18:0)                             | C41H76NO8P  | 740.5231574 | No |

|       |                                 |                                                                                                                                                                                                                                                                                                                                                                                                                                                                                                                                                                                                                                                                                                                                                                                                                                                                                                                                                                                                                                                                                                                                                                                                                                                                                                                                                                                                                                                                                                                                                                                                                                                                                                                                                                                                                                                                                                                                                                                                                                                                                                                                                                                                                                                                                                                                                                                                                                                                                                                                                                                                                                                                                                                                                                                                                                                                                                                                                                                                                                                                                                                                                                                                                                                                                                                                                                                                                                                                                                                                                                                                                                                                                                                                                                                                                                                                                                                                                                                                                                                                                                                                                                                                                                                                                                                                                                                                                                                                                                                                                                                                                                                                                                                                                                                                                                                                                                                                                                                                                                                                                                                                                                                                                                                                                                                                                                                                                                                                                                                                                                                                                                                                                                                                             |            |             |    |
|-------|---------------------------------|---------------------------------------------------------------------------------------------------------------------------------------------------------------------------------------------------------------------------------------------------------------------------------------------------------------------------------------------------------------------------------------------------------------------------------------------------------------------------------------------------------------------------------------------------------------------------------------------------------------------------------------------------------------------------------------------------------------------------------------------------------------------------------------------------------------------------------------------------------------------------------------------------------------------------------------------------------------------------------------------------------------------------------------------------------------------------------------------------------------------------------------------------------------------------------------------------------------------------------------------------------------------------------------------------------------------------------------------------------------------------------------------------------------------------------------------------------------------------------------------------------------------------------------------------------------------------------------------------------------------------------------------------------------------------------------------------------------------------------------------------------------------------------------------------------------------------------------------------------------------------------------------------------------------------------------------------------------------------------------------------------------------------------------------------------------------------------------------------------------------------------------------------------------------------------------------------------------------------------------------------------------------------------------------------------------------------------------------------------------------------------------------------------------------------------------------------------------------------------------------------------------------------------------------------------------------------------------------------------------------------------------------------------------------------------------------------------------------------------------------------------------------------------------------------------------------------------------------------------------------------------------------------------------------------------------------------------------------------------------------------------------------------------------------------------------------------------------------------------------------------------------------------------------------------------------------------------------------------------------------------------------------------------------------------------------------------------------------------------------------------------------------------------------------------------------------------------------------------------------------------------------------------------------------------------------------------------------------------------------------------------------------------------------------------------------------------------------------------------------------------------------------------------------------------------------------------------------------------------------------------------------------------------------------------------------------------------------------------------------------------------------------------------------------------------------------------------------------------------------------------------------------------------------------------------------------------------------------------------------------------------------------------------------------------------------------------------------------------------------------------------------------------------------------------------------------------------------------------------------------------------------------------------------------------------------------------------------------------------------------------------------------------------------------------------------------------------------------------------------------------------------------------------------------------------------------------------------------------------------------------------------------------------------------------------------------------------------------------------------------------------------------------------------------------------------------------------------------------------------------------------------------------------------------------------------------------------------------------------------------------------------------------------------------------------------------------------------------------------------------------------------------------------------------------------------------------------------------------------------------------------------------------------------------------------------------------------------------------------------------------------------------------------------------------------------------------------------------------------------------|------------|-------------|----|
| 12586 | HMDB0009287; C00350             | PE(20:2(11Z,14Z)/16:1(9Z))                                                                                                                                                                                                                                                                                                                                                                                                                                                                                                                                                                                                                                                                                                                                                                                                                                                                                                                                                                                                                                                                                                                                                                                                                                                                                                                                                                                                                                                                                                                                                                                                                                                                                                                                                                                                                                                                                                                                                                                                                                                                                                                                                                                                                                                                                                                                                                                                                                                                                                                                                                                                                                                                                                                                                                                                                                                                                                                                                                                                                                                                                                                                                                                                                                                                                                                                                                                                                                                                                                                                                                                                                                                                                                                                                                                                                                                                                                                                                                                                                                                                                                                                                                                                                                                                                                                                                                                                                                                                                                                                                                                                                                                                                                                                                                                                                                                                                                                                                                                                                                                                                                                                                                                                                                                                                                                                                                                                                                                                                                                                                                                                                                                                                                                  | C41H76NO8P | 740.5231574 | No |
| 12586 | HMDB0009319; C00350             | PE(20:3(5Z,8Z,11Z)/16:0)                                                                                                                                                                                                                                                                                                                                                                                                                                                                                                                                                                                                                                                                                                                                                                                                                                                                                                                                                                                                                                                                                                                                                                                                                                                                                                                                                                                                                                                                                                                                                                                                                                                                                                                                                                                                                                                                                                                                                                                                                                                                                                                                                                                                                                                                                                                                                                                                                                                                                                                                                                                                                                                                                                                                                                                                                                                                                                                                                                                                                                                                                                                                                                                                                                                                                                                                                                                                                                                                                                                                                                                                                                                                                                                                                                                                                                                                                                                                                                                                                                                                                                                                                                                                                                                                                                                                                                                                                                                                                                                                                                                                                                                                                                                                                                                                                                                                                                                                                                                                                                                                                                                                                                                                                                                                                                                                                                                                                                                                                                                                                                                                                                                                                                                    | C41H76NO8P | 740.5231574 | No |
| 12586 | HMDB0009352; C00350             | PE(20:3(8Z,11Z,14Z)/16:0)                                                                                                                                                                                                                                                                                                                                                                                                                                                                                                                                                                                                                                                                                                                                                                                                                                                                                                                                                                                                                                                                                                                                                                                                                                                                                                                                                                                                                                                                                                                                                                                                                                                                                                                                                                                                                                                                                                                                                                                                                                                                                                                                                                                                                                                                                                                                                                                                                                                                                                                                                                                                                                                                                                                                                                                                                                                                                                                                                                                                                                                                                                                                                                                                                                                                                                                                                                                                                                                                                                                                                                                                                                                                                                                                                                                                                                                                                                                                                                                                                                                                                                                                                                                                                                                                                                                                                                                                                                                                                                                                                                                                                                                                                                                                                                                                                                                                                                                                                                                                                                                                                                                                                                                                                                                                                                                                                                                                                                                                                                                                                                                                                                                                                                                   | C41H76NO8P | 740.5231574 | No |
| 12586 | HMDB0009548; C00350             | PE(22:2(13Z,16Z)/14:1(9Z))                                                                                                                                                                                                                                                                                                                                                                                                                                                                                                                                                                                                                                                                                                                                                                                                                                                                                                                                                                                                                                                                                                                                                                                                                                                                                                                                                                                                                                                                                                                                                                                                                                                                                                                                                                                                                                                                                                                                                                                                                                                                                                                                                                                                                                                                                                                                                                                                                                                                                                                                                                                                                                                                                                                                                                                                                                                                                                                                                                                                                                                                                                                                                                                                                                                                                                                                                                                                                                                                                                                                                                                                                                                                                                                                                                                                                                                                                                                                                                                                                                                                                                                                                                                                                                                                                                                                                                                                                                                                                                                                                                                                                                                                                                                                                                                                                                                                                                                                                                                                                                                                                                                                                                                                                                                                                                                                                                                                                                                                                                                                                                                                                                                                                                                  | C41H76NO8P | 740.5231574 | No |
| 12586 | HMDB0113026                     | PE-NMe(15:0/20:3(5Z,8Z,11Z))                                                                                                                                                                                                                                                                                                                                                                                                                                                                                                                                                                                                                                                                                                                                                                                                                                                                                                                                                                                                                                                                                                                                                                                                                                                                                                                                                                                                                                                                                                                                                                                                                                                                                                                                                                                                                                                                                                                                                                                                                                                                                                                                                                                                                                                                                                                                                                                                                                                                                                                                                                                                                                                                                                                                                                                                                                                                                                                                                                                                                                                                                                                                                                                                                                                                                                                                                                                                                                                                                                                                                                                                                                                                                                                                                                                                                                                                                                                                                                                                                                                                                                                                                                                                                                                                                                                                                                                                                                                                                                                                                                                                                                                                                                                                                                                                                                                                                                                                                                                                                                                                                                                                                                                                                                                                                                                                                                                                                                                                                                                                                                                                                                                                                                                | C41H76NO8P | 740.5231574 | No |
| 12586 | HMDB0113027                     | PE-NMe(15:0/20:3(8Z,11Z,14Z))                                                                                                                                                                                                                                                                                                                                                                                                                                                                                                                                                                                                                                                                                                                                                                                                                                                                                                                                                                                                                                                                                                                                                                                                                                                                                                                                                                                                                                                                                                                                                                                                                                                                                                                                                                                                                                                                                                                                                                                                                                                                                                                                                                                                                                                                                                                                                                                                                                                                                                                                                                                                                                                                                                                                                                                                                                                                                                                                                                                                                                                                                                                                                                                                                                                                                                                                                                                                                                                                                                                                                                                                                                                                                                                                                                                                                                                                                                                                                                                                                                                                                                                                                                                                                                                                                                                                                                                                                                                                                                                                                                                                                                                                                                                                                                                                                                                                                                                                                                                                                                                                                                                                                                                                                                                                                                                                                                                                                                                                                                                                                                                                                                                                                                               | C41H76NO8P | 740.5231574 | No |
| 12586 | HMDB0113368                     | PE-NMe(20:3(5Z,8Z,11Z)/15:0)                                                                                                                                                                                                                                                                                                                                                                                                                                                                                                                                                                                                                                                                                                                                                                                                                                                                                                                                                                                                                                                                                                                                                                                                                                                                                                                                                                                                                                                                                                                                                                                                                                                                                                                                                                                                                                                                                                                                                                                                                                                                                                                                                                                                                                                                                                                                                                                                                                                                                                                                                                                                                                                                                                                                                                                                                                                                                                                                                                                                                                                                                                                                                                                                                                                                                                                                                                                                                                                                                                                                                                                                                                                                                                                                                                                                                                                                                                                                                                                                                                                                                                                                                                                                                                                                                                                                                                                                                                                                                                                                                                                                                                                                                                                                                                                                                                                                                                                                                                                                                                                                                                                                                                                                                                                                                                                                                                                                                                                                                                                                                                                                                                                                                                                | C41H76NO8P | 740.5231574 | No |
| 12586 | HMDB0113396                     | PE-NMe(20:3(8Z,11Z,14Z)/15:0)                                                                                                                                                                                                                                                                                                                                                                                                                                                                                                                                                                                                                                                                                                                                                                                                                                                                                                                                                                                                                                                                                                                                                                                                                                                                                                                                                                                                                                                                                                                                                                                                                                                                                                                                                                                                                                                                                                                                                                                                                                                                                                                                                                                                                                                                                                                                                                                                                                                                                                                                                                                                                                                                                                                                                                                                                                                                                                                                                                                                                                                                                                                                                                                                                                                                                                                                                                                                                                                                                                                                                                                                                                                                                                                                                                                                                                                                                                                                                                                                                                                                                                                                                                                                                                                                                                                                                                                                                                                                                                                                                                                                                                                                                                                                                                                                                                                                                                                                                                                                                                                                                                                                                                                                                                                                                                                                                                                                                                                                                                                                                                                                                                                                                                               | C41H76NO8P | 740.5231574 | No |
| 12586 | HMDB0113885                     | PE-NMe2(14:0/20:3(5Z,8Z,11Z))                                                                                                                                                                                                                                                                                                                                                                                                                                                                                                                                                                                                                                                                                                                                                                                                                                                                                                                                                                                                                                                                                                                                                                                                                                                                                                                                                                                                                                                                                                                                                                                                                                                                                                                                                                                                                                                                                                                                                                                                                                                                                                                                                                                                                                                                                                                                                                                                                                                                                                                                                                                                                                                                                                                                                                                                                                                                                                                                                                                                                                                                                                                                                                                                                                                                                                                                                                                                                                                                                                                                                                                                                                                                                                                                                                                                                                                                                                                                                                                                                                                                                                                                                                                                                                                                                                                                                                                                                                                                                                                                                                                                                                                                                                                                                                                                                                                                                                                                                                                                                                                                                                                                                                                                                                                                                                                                                                                                                                                                                                                                                                                                                                                                                                               | C41H76NO8P | 740.5231574 | No |
| 12586 | HMDB0113886                     | PE-NMe2(14:0/20:3(8Z,11Z,14Z))                                                                                                                                                                                                                                                                                                                                                                                                                                                                                                                                                                                                                                                                                                                                                                                                                                                                                                                                                                                                                                                                                                                                                                                                                                                                                                                                                                                                                                                                                                                                                                                                                                                                                                                                                                                                                                                                                                                                                                                                                                                                                                                                                                                                                                                                                                                                                                                                                                                                                                                                                                                                                                                                                                                                                                                                                                                                                                                                                                                                                                                                                                                                                                                                                                                                                                                                                                                                                                                                                                                                                                                                                                                                                                                                                                                                                                                                                                                                                                                                                                                                                                                                                                                                                                                                                                                                                                                                                                                                                                                                                                                                                                                                                                                                                                                                                                                                                                                                                                                                                                                                                                                                                                                                                                                                                                                                                                                                                                                                                                                                                                                                                                                                                                              | C41H76NO8P | 740.5231574 | No |
| 12586 | HMDB0113904                     | PE-NMe2(14:1(9Z)/20:2(11Z,14Z))                                                                                                                                                                                                                                                                                                                                                                                                                                                                                                                                                                                                                                                                                                                                                                                                                                                                                                                                                                                                                                                                                                                                                                                                                                                                                                                                                                                                                                                                                                                                                                                                                                                                                                                                                                                                                                                                                                                                                                                                                                                                                                                                                                                                                                                                                                                                                                                                                                                                                                                                                                                                                                                                                                                                                                                                                                                                                                                                                                                                                                                                                                                                                                                                                                                                                                                                                                                                                                                                                                                                                                                                                                                                                                                                                                                                                                                                                                                                                                                                                                                                                                                                                                                                                                                                                                                                                                                                                                                                                                                                                                                                                                                                                                                                                                                                                                                                                                                                                                                                                                                                                                                                                                                                                                                                                                                                                                                                                                                                                                                                                                                                                                                                                                             | C41H76NO8P | 740.5231574 | No |
| 12586 | HMDB0113944                     | PE-NMe2(16:0/18:3(6Z,9Z,12Z))                                                                                                                                                                                                                                                                                                                                                                                                                                                                                                                                                                                                                                                                                                                                                                                                                                                                                                                                                                                                                                                                                                                                                                                                                                                                                                                                                                                                                                                                                                                                                                                                                                                                                                                                                                                                                                                                                                                                                                                                                                                                                                                                                                                                                                                                                                                                                                                                                                                                                                                                                                                                                                                                                                                                                                                                                                                                                                                                                                                                                                                                                                                                                                                                                                                                                                                                                                                                                                                                                                                                                                                                                                                                                                                                                                                                                                                                                                                                                                                                                                                                                                                                                                                                                                                                                                                                                                                                                                                                                                                                                                                                                                                                                                                                                                                                                                                                                                                                                                                                                                                                                                                                                                                                                                                                                                                                                                                                                                                                                                                                                                                                                                                                                                               | C41H76NO8P | 740.5231574 | No |
| 12586 | HMDB0113945                     | PE-NMe2(16:0/18:3(9Z,12Z,15Z))                                                                                                                                                                                                                                                                                                                                                                                                                                                                                                                                                                                                                                                                                                                                                                                                                                                                                                                                                                                                                                                                                                                                                                                                                                                                                                                                                                                                                                                                                                                                                                                                                                                                                                                                                                                                                                                                                                                                                                                                                                                                                                                                                                                                                                                                                                                                                                                                                                                                                                                                                                                                                                                                                                                                                                                                                                                                                                                                                                                                                                                                                                                                                                                                                                                                                                                                                                                                                                                                                                                                                                                                                                                                                                                                                                                                                                                                                                                                                                                                                                                                                                                                                                                                                                                                                                                                                                                                                                                                                                                                                                                                                                                                                                                                                                                                                                                                                                                                                                                                                                                                                                                                                                                                                                                                                                                                                                                                                                                                                                                                                                                                                                                                                                              | C41H76NO8P | 740.5231574 | No |
| 12586 | HMDB0113966                     | PE-NMe2(16:1(9Z)/18:2(9Z,12Z))                                                                                                                                                                                                                                                                                                                                                                                                                                                                                                                                                                                                                                                                                                                                                                                                                                                                                                                                                                                                                                                                                                                                                                                                                                                                                                                                                                                                                                                                                                                                                                                                                                                                                                                                                                                                                                                                                                                                                                                                                                                                                                                                                                                                                                                                                                                                                                                                                                                                                                                                                                                                                                                                                                                                                                                                                                                                                                                                                                                                                                                                                                                                                                                                                                                                                                                                                                                                                                                                                                                                                                                                                                                                                                                                                                                                                                                                                                                                                                                                                                                                                                                                                                                                                                                                                                                                                                                                                                                                                                                                                                                                                                                                                                                                                                                                                                                                                                                                                                                                                                                                                                                                                                                                                                                                                                                                                                                                                                                                                                                                                                                                                                                                                                              | C41H76NO8P | 740.5231574 | No |
| 12586 | HMDB0114069                     | PE-NMe2(18:2(9Z,12Z)/16:1(9Z))                                                                                                                                                                                                                                                                                                                                                                                                                                                                                                                                                                                                                                                                                                                                                                                                                                                                                                                                                                                                                                                                                                                                                                                                                                                                                                                                                                                                                                                                                                                                                                                                                                                                                                                                                                                                                                                                                                                                                                                                                                                                                                                                                                                                                                                                                                                                                                                                                                                                                                                                                                                                                                                                                                                                                                                                                                                                                                                                                                                                                                                                                                                                                                                                                                                                                                                                                                                                                                                                                                                                                                                                                                                                                                                                                                                                                                                                                                                                                                                                                                                                                                                                                                                                                                                                                                                                                                                                                                                                                                                                                                                                                                                                                                                                                                                                                                                                                                                                                                                                                                                                                                                                                                                                                                                                                                                                                                                                                                                                                                                                                                                                                                                                                                              | C41H76NO8P | 740.5231574 | No |
| 12586 | HMDB0114097                     | PE-NMe2(18:3(6Z,9Z,12Z)/16:0)                                                                                                                                                                                                                                                                                                                                                                                                                                                                                                                                                                                                                                                                                                                                                                                                                                                                                                                                                                                                                                                                                                                                                                                                                                                                                                                                                                                                                                                                                                                                                                                                                                                                                                                                                                                                                                                                                                                                                                                                                                                                                                                                                                                                                                                                                                                                                                                                                                                                                                                                                                                                                                                                                                                                                                                                                                                                                                                                                                                                                                                                                                                                                                                                                                                                                                                                                                                                                                                                                                                                                                                                                                                                                                                                                                                                                                                                                                                                                                                                                                                                                                                                                                                                                                                                                                                                                                                                                                                                                                                                                                                                                                                                                                                                                                                                                                                                                                                                                                                                                                                                                                                                                                                                                                                                                                                                                                                                                                                                                                                                                                                                                                                                                                               | C41H76NO8P | 740.5231574 | No |
| 12586 | HMDB0114126                     | PE-NMe2(18:3(9Z,12Z,15Z)/16:0)                                                                                                                                                                                                                                                                                                                                                                                                                                                                                                                                                                                                                                                                                                                                                                                                                                                                                                                                                                                                                                                                                                                                                                                                                                                                                                                                                                                                                                                                                                                                                                                                                                                                                                                                                                                                                                                                                                                                                                                                                                                                                                                                                                                                                                                                                                                                                                                                                                                                                                                                                                                                                                                                                                                                                                                                                                                                                                                                                                                                                                                                                                                                                                                                                                                                                                                                                                                                                                                                                                                                                                                                                                                                                                                                                                                                                                                                                                                                                                                                                                                                                                                                                                                                                                                                                                                                                                                                                                                                                                                                                                                                                                                                                                                                                                                                                                                                                                                                                                                                                                                                                                                                                                                                                                                                                                                                                                                                                                                                                                                                                                                                                                                                                                              | C41H76NO8P | 740.5231574 | No |
| 12586 | HMDB0114240                     | PE-NMe2(20:2(11Z,14Z)/14:1(9Z))                                                                                                                                                                                                                                                                                                                                                                                                                                                                                                                                                                                                                                                                                                                                                                                                                                                                                                                                                                                                                                                                                                                                                                                                                                                                                                                                                                                                                                                                                                                                                                                                                                                                                                                                                                                                                                                                                                                                                                                                                                                                                                                                                                                                                                                                                                                                                                                                                                                                                                                                                                                                                                                                                                                                                                                                                                                                                                                                                                                                                                                                                                                                                                                                                                                                                                                                                                                                                                                                                                                                                                                                                                                                                                                                                                                                                                                                                                                                                                                                                                                                                                                                                                                                                                                                                                                                                                                                                                                                                                                                                                                                                                                                                                                                                                                                                                                                                                                                                                                                                                                                                                                                                                                                                                                                                                                                                                                                                                                                                                                                                                                                                                                                                                             | C41H76NO8P | 740.5231574 | No |
| 12586 | HMDB0114268                     | PE-NMe2(20:3(5Z,8Z,11Z)/14:0)                                                                                                                                                                                                                                                                                                                                                                                                                                                                                                                                                                                                                                                                                                                                                                                                                                                                                                                                                                                                                                                                                                                                                                                                                                                                                                                                                                                                                                                                                                                                                                                                                                                                                                                                                                                                                                                                                                                                                                                                                                                                                                                                                                                                                                                                                                                                                                                                                                                                                                                                                                                                                                                                                                                                                                                                                                                                                                                                                                                                                                                                                                                                                                                                                                                                                                                                                                                                                                                                                                                                                                                                                                                                                                                                                                                                                                                                                                                                                                                                                                                                                                                                                                                                                                                                                                                                                                                                                                                                                                                                                                                                                                                                                                                                                                                                                                                                                                                                                                                                                                                                                                                                                                                                                                                                                                                                                                                                                                                                                                                                                                                                                                                                                                               | C41H76NO8P | 740.5231574 | No |
| 12586 | HMDB0114296                     | PE-NMe2(20:3(8Z,11Z,14Z)/14:0)                                                                                                                                                                                                                                                                                                                                                                                                                                                                                                                                                                                                                                                                                                                                                                                                                                                                                                                                                                                                                                                                                                                                                                                                                                                                                                                                                                                                                                                                                                                                                                                                                                                                                                                                                                                                                                                                                                                                                                                                                                                                                                                                                                                                                                                                                                                                                                                                                                                                                                                                                                                                                                                                                                                                                                                                                                                                                                                                                                                                                                                                                                                                                                                                                                                                                                                                                                                                                                                                                                                                                                                                                                                                                                                                                                                                                                                                                                                                                                                                                                                                                                                                                                                                                                                                                                                                                                                                                                                                                                                                                                                                                                                                                                                                                                                                                                                                                                                                                                                                                                                                                                                                                                                                                                                                                                                                                                                                                                                                                                                                                                                                                                                                                                              | C41H76NO8P | 740.5231574 | No |
| 12596 | HMDB0038345                     | Alliosterol 1-rhamnoside 16-galactoside                                                                                                                                                                                                                                                                                                                                                                                                                                                                                                                                                                                                                                                                                                                                                                                                                                                                                                                                                                                                                                                                                                                                                                                                                                                                                                                                                                                                                                                                                                                                                                                                                                                                                                                                                                                                                                                                                                                                                                                                                                                                                                                                                                                                                                                                                                                                                                                                                                                                                                                                                                                                                                                                                                                                                                                                                                                                                                                                                                                                                                                                                                                                                                                                                                                                                                                                                                                                                                                                                                                                                                                                                                                                                                                                                                                                                                                                                                                                                                                                                                                                                                                                                                                                                                                                                                                                                                                                                                                                                                                                                                                                                                                                                                                                                                                                                                                                                                                                                                                                                                                                                                                                                                                                                                                                                                                                                                                                                                                                                                                                                                                                                                                                                                     | C39H66O13  | 741.4409456 | No |
| 12597 | HMDB0114997                     | PA(18:3(6Z,9Z,12Z)/22:6(4Z,7Z,10Z,13Z,16Z,19Z))                                                                                                                                                                                                                                                                                                                                                                                                                                                                                                                                                                                                                                                                                                                                                                                                                                                                                                                                                                                                                                                                                                                                                                                                                                                                                                                                                                                                                                                                                                                                                                                                                                                                                                                                                                                                                                                                                                                                                                                                                                                                                                                                                                                                                                                                                                                                                                                                                                                                                                                                                                                                                                                                                                                                                                                                                                                                                                                                                                                                                                                                                                                                                                                                                                                                                                                                                                                                                                                                                                                                                                                                                                                                                                                                                                                                                                                                                                                                                                                                                                                                                                                                                                                                                                                                                                                                                                                                                                                                                                                                                                                                                                                                                                                                                                                                                                                                                                                                                                                                                                                                                                                                                                                                                                                                                                                                                                                                                                                                                                                                                                                                                                                                                             | C43H67O8P  | 741.4509757 | No |
| 12597 | HMDB0115024                     | PA(18:3(9Z,12Z,15Z)/22:6(4Z,7Z,10Z,13Z,16Z,19Z))                                                                                                                                                                                                                                                                                                                                                                                                                                                                                                                                                                                                                                                                                                                                                                                                                                                                                                                                                                                                                                                                                                                                                                                                                                                                                                                                                                                                                                                                                                                                                                                                                                                                                                                                                                                                                                                                                                                                                                                                                                                                                                                                                                                                                                                                                                                                                                                                                                                                                                                                                                                                                                                                                                                                                                                                                                                                                                                                                                                                                                                                                                                                                                                                                                                                                                                                                                                                                                                                                                                                                                                                                                                                                                                                                                                                                                                                                                                                                                                                                                                                                                                                                                                                                                                                                                                                                                                                                                                                                                                                                                                                                                                                                                                                                                                                                                                                                                                                                                                                                                                                                                                                                                                                                                                                                                                                                                                                                                                                                                                                                                                                                                                                                            | C43H67O8P  | 741.4509757 | No |
| 12597 | HMDB0115049                     | PA(18:4(6Z,9Z,12Z,15Z)/22:5(4Z,7Z,10Z,13Z,16Z))                                                                                                                                                                                                                                                                                                                                                                                                                                                                                                                                                                                                                                                                                                                                                                                                                                                                                                                                                                                                                                                                                                                                                                                                                                                                                                                                                                                                                                                                                                                                                                                                                                                                                                                                                                                                                                                                                                                                                                                                                                                                                                                                                                                                                                                                                                                                                                                                                                                                                                                                                                                                                                                                                                                                                                                                                                                                                                                                                                                                                                                                                                                                                                                                                                                                                                                                                                                                                                                                                                                                                                                                                                                                                                                                                                                                                                                                                                                                                                                                                                                                                                                                                                                                                                                                                                                                                                                                                                                                                                                                                                                                                                                                                                                                                                                                                                                                                                                                                                                                                                                                                                                                                                                                                                                                                                                                                                                                                                                                                                                                                                                                                                                                                             | C43H67O8P  | 741.4509757 | No |
| 12597 | HMDB0115050                     | PA(18:4(6Z,9Z,12Z,15Z)/22:5(7Z,10Z,13Z,16Z,19Z))                                                                                                                                                                                                                                                                                                                                                                                                                                                                                                                                                                                                                                                                                                                                                                                                                                                                                                                                                                                                                                                                                                                                                                                                                                                                                                                                                                                                                                                                                                                                                                                                                                                                                                                                                                                                                                                                                                                                                                                                                                                                                                                                                                                                                                                                                                                                                                                                                                                                                                                                                                                                                                                                                                                                                                                                                                                                                                                                                                                                                                                                                                                                                                                                                                                                                                                                                                                                                                                                                                                                                                                                                                                                                                                                                                                                                                                                                                                                                                                                                                                                                                                                                                                                                                                                                                                                                                                                                                                                                                                                                                                                                                                                                                                                                                                                                                                                                                                                                                                                                                                                                                                                                                                                                                                                                                                                                                                                                                                                                                                                                                                                                                                                                            | C43H67O8P  | 741.4509757 | No |
| 12597 | HMDB0115161                     | PA(20:4(5Z,8Z,11Z,14Z)/20:5(5Z,8Z,11Z,14Z,17Z))                                                                                                                                                                                                                                                                                                                                                                                                                                                                                                                                                                                                                                                                                                                                                                                                                                                                                                                                                                                                                                                                                                                                                                                                                                                                                                                                                                                                                                                                                                                                                                                                                                                                                                                                                                                                                                                                                                                                                                                                                                                                                                                                                                                                                                                                                                                                                                                                                                                                                                                                                                                                                                                                                                                                                                                                                                                                                                                                                                                                                                                                                                                                                                                                                                                                                                                                                                                                                                                                                                                                                                                                                                                                                                                                                                                                                                                                                                                                                                                                                                                                                                                                                                                                                                                                                                                                                                                                                                                                                                                                                                                                                                                                                                                                                                                                                                                                                                                                                                                                                                                                                                                                                                                                                                                                                                                                                                                                                                                                                                                                                                                                                                                                                             | C43H67O8P  | 741.4509757 | No |
| 12597 | HMDB0115188                     | PA(20:4(8Z,11Z,14Z,17Z)/20:5(5Z,8Z,11Z,14Z,17Z))                                                                                                                                                                                                                                                                                                                                                                                                                                                                                                                                                                                                                                                                                                                                                                                                                                                                                                                                                                                                                                                                                                                                                                                                                                                                                                                                                                                                                                                                                                                                                                                                                                                                                                                                                                                                                                                                                                                                                                                                                                                                                                                                                                                                                                                                                                                                                                                                                                                                                                                                                                                                                                                                                                                                                                                                                                                                                                                                                                                                                                                                                                                                                                                                                                                                                                                                                                                                                                                                                                                                                                                                                                                                                                                                                                                                                                                                                                                                                                                                                                                                                                                                                                                                                                                                                                                                                                                                                                                                                                                                                                                                                                                                                                                                                                                                                                                                                                                                                                                                                                                                                                                                                                                                                                                                                                                                                                                                                                                                                                                                                                                                                                                                                            | C43H67O8P  | 741.4509757 | No |
| 12597 | HMDB0115212                     | PA(20:5(5Z,8Z,11Z,14Z,17Z)/20:4(5Z,8Z,11Z,14Z))                                                                                                                                                                                                                                                                                                                                                                                                                                                                                                                                                                                                                                                                                                                                                                                                                                                                                                                                                                                                                                                                                                                                                                                                                                                                                                                                                                                                                                                                                                                                                                                                                                                                                                                                                                                                                                                                                                                                                                                                                                                                                                                                                                                                                                                                                                                                                                                                                                                                                                                                                                                                                                                                                                                                                                                                                                                                                                                                                                                                                                                                                                                                                                                                                                                                                                                                                                                                                                                                                                                                                                                                                                                                                                                                                                                                                                                                                                                                                                                                                                                                                                                                                                                                                                                                                                                                                                                                                                                                                                                                                                                                                                                                                                                                                                                                                                                                                                                                                                                                                                                                                                                                                                                                                                                                                                                                                                                                                                                                                                                                                                                                                                                                                             | C43H67O8P  | 741.4509757 | No |
| 12597 | HMDB0115213                     | PA(20:5(5Z,8Z,11Z,14Z,17Z)/20:4(8Z,11Z,14Z,17Z))                                                                                                                                                                                                                                                                                                                                                                                                                                                                                                                                                                                                                                                                                                                                                                                                                                                                                                                                                                                                                                                                                                                                                                                                                                                                                                                                                                                                                                                                                                                                                                                                                                                                                                                                                                                                                                                                                                                                                                                                                                                                                                                                                                                                                                                                                                                                                                                                                                                                                                                                                                                                                                                                                                                                                                                                                                                                                                                                                                                                                                                                                                                                                                                                                                                                                                                                                                                                                                                                                                                                                                                                                                                                                                                                                                                                                                                                                                                                                                                                                                                                                                                                                                                                                                                                                                                                                                                                                                                                                                                                                                                                                                                                                                                                                                                                                                                                                                                                                                                                                                                                                                                                                                                                                                                                                                                                                                                                                                                                                                                                                                                                                                                                                            | C43H67O8P  | 741.4509757 | No |
| 12597 | HMDB0115360                     | PA(22:5(4Z,7Z,10Z,13Z,16Z)/18:4(6Z,9Z,12Z,15Z))                                                                                                                                                                                                                                                                                                                                                                                                                                                                                                                                                                                                                                                                                                                                                                                                                                                                                                                                                                                                                                                                                                                                                                                                                                                                                                                                                                                                                                                                                                                                                                                                                                                                                                                                                                                                                                                                                                                                                                                                                                                                                                                                                                                                                                                                                                                                                                                                                                                                                                                                                                                                                                                                                                                                                                                                                                                                                                                                                                                                                                                                                                                                                                                                                                                                                                                                                                                                                                                                                                                                                                                                                                                                                                                                                                                                                                                                                                                                                                                                                                                                                                                                                                                                                                                                                                                                                                                                                                                                                                                                                                                                                                                                                                                                                                                                                                                                                                                                                                                                                                                                                                                                                                                                                                                                                                                                                                                                                                                                                                                                                                                                                                                                                             | C43H67O8P  | 741.4509757 | No |
| 12597 | HMDB0115386                     | PA(22:5(7Z,10Z,13Z,16Z,19Z)/18:4(6Z,9Z,12Z,15Z))                                                                                                                                                                                                                                                                                                                                                                                                                                                                                                                                                                                                                                                                                                                                                                                                                                                                                                                                                                                                                                                                                                                                                                                                                                                                                                                                                                                                                                                                                                                                                                                                                                                                                                                                                                                                                                                                                                                                                                                                                                                                                                                                                                                                                                                                                                                                                                                                                                                                                                                                                                                                                                                                                                                                                                                                                                                                                                                                                                                                                                                                                                                                                                                                                                                                                                                                                                                                                                                                                                                                                                                                                                                                                                                                                                                                                                                                                                                                                                                                                                                                                                                                                                                                                                                                                                                                                                                                                                                                                                                                                                                                                                                                                                                                                                                                                                                                                                                                                                                                                                                                                                                                                                                                                                                                                                                                                                                                                                                                                                                                                                                                                                                                                            | C43H67O8P  | 741.4509757 | No |
| 12597 | HMDB0115410                     | PA(22:6(4Z,7Z,10Z,13Z,16Z,19Z)/18:3(6Z,9Z,12Z))                                                                                                                                                                                                                                                                                                                                                                                                                                                                                                                                                                                                                                                                                                                                                                                                                                                                                                                                                                                                                                                                                                                                                                                                                                                                                                                                                                                                                                                                                                                                                                                                                                                                                                                                                                                                                                                                                                                                                                                                                                                                                                                                                                                                                                                                                                                                                                                                                                                                                                                                                                                                                                                                                                                                                                                                                                                                                                                                                                                                                                                                                                                                                                                                                                                                                                                                                                                                                                                                                                                                                                                                                                                                                                                                                                                                                                                                                                                                                                                                                                                                                                                                                                                                                                                                                                                                                                                                                                                                                                                                                                                                                                                                                                                                                                                                                                                                                                                                                                                                                                                                                                                                                                                                                                                                                                                                                                                                                                                                                                                                                                                                                                                                                             | C43H67O8P  | 741.4509757 | No |
| 12597 | HMDB0115411                     | PA(22:6(4Z,7Z,10Z,13Z,16Z,19Z)/18:3(9Z,12Z,15Z))                                                                                                                                                                                                                                                                                                                                                                                                                                                                                                                                                                                                                                                                                                                                                                                                                                                                                                                                                                                                                                                                                                                                                                                                                                                                                                                                                                                                                                                                                                                                                                                                                                                                                                                                                                                                                                                                                                                                                                                                                                                                                                                                                                                                                                                                                                                                                                                                                                                                                                                                                                                                                                                                                                                                                                                                                                                                                                                                                                                                                                                                                                                                                                                                                                                                                                                                                                                                                                                                                                                                                                                                                                                                                                                                                                                                                                                                                                                                                                                                                                                                                                                                                                                                                                                                                                                                                                                                                                                                                                                                                                                                                                                                                                                                                                                                                                                                                                                                                                                                                                                                                                                                                                                                                                                                                                                                                                                                                                                                                                                                                                                                                                                                                            | C43H67O8P  | 741.4509757 | No |
| 12599 | HMDB0116374                     | DG(11D3/13M5/0:0)                                                                                                                                                                                                                                                                                                                                                                                                                                                                                                                                                                                                                                                                                                                                                                                                                                                                                                                                                                                                                                                                                                                                                                                                                                                                                                                                                                                                                                                                                                                                                                                                                                                                                                                                                                                                                                                                                                                                                                                                                                                                                                                                                                                                                                                                                                                                                                                                                                                                                                                                                                                                                                                                                                                                                                                                                                                                                                                                                                                                                                                                                                                                                                                                                                                                                                                                                                                                                                                                                                                                                                                                                                                                                                                                                                                                                                                                                                                                                                                                                                                                                                                                                                                                                                                                                                                                                                                                                                                                                                                                                                                                                                                                                                                                                                                                                                                                                                                                                                                                                                                                                                                                                                                                                                                                                                                                                                                                                                                                                                                                                                                                                                                                                                                           | C46H78O7   | 741.5697973 | No |
| 12599 | HMDB0116381                     | DG(11D5/11M5/0:0)                                                                                                                                                                                                                                                                                                                                                                                                                                                                                                                                                                                                                                                                                                                                                                                                                                                                                                                                                                                                                                                                                                                                                                                                                                                                                                                                                                                                                                                                                                                                                                                                                                                                                                                                                                                                                                                                                                                                                                                                                                                                                                                                                                                                                                                                                                                                                                                                                                                                                                                                                                                                                                                                                                                                                                                                                                                                                                                                                                                                                                                                                                                                                                                                                                                                                                                                                                                                                                                                                                                                                                                                                                                                                                                                                                                                                                                                                                                                                                                                                                                                                                                                                                                                                                                                                                                                                                                                                                                                                                                                                                                                                                                                                                                                                                                                                                                                                                                                                                                                                                                                                                                                                                                                                                                                                                                                                                                                                                                                                                                                                                                                                                                                                                                           | C46H78O7   | 741.5697973 | No |
| 12599 | HMDB0116391                     | DG(11M3/13D5/0:0)                                                                                                                                                                                                                                                                                                                                                                                                                                                                                                                                                                                                                                                                                                                                                                                                                                                                                                                                                                                                                                                                                                                                                                                                                                                                                                                                                                                                                                                                                                                                                                                                                                                                                                                                                                                                                                                                                                                                                                                                                                                                                                                                                                                                                                                                                                                                                                                                                                                                                                                                                                                                                                                                                                                                                                                                                                                                                                                                                                                                                                                                                                                                                                                                                                                                                                                                                                                                                                                                                                                                                                                                                                                                                                                                                                                                                                                                                                                                                                                                                                                                                                                                                                                                                                                                                                                                                                                                                                                                                                                                                                                                                                                                                                                                                                                                                                                                                                                                                                                                                                                                                                                                                                                                                                                                                                                                                                                                                                                                                                                                                                                                                                                                                                                           | C46H78O7   | 741.5697973 | No |
| 12599 | HMDB0116397                     | DG(11M5/11D5/0:0)                                                                                                                                                                                                                                                                                                                                                                                                                                                                                                                                                                                                                                                                                                                                                                                                                                                                                                                                                                                                                                                                                                                                                                                                                                                                                                                                                                                                                                                                                                                                                                                                                                                                                                                                                                                                                                                                                                                                                                                                                                                                                                                                                                                                                                                                                                                                                                                                                                                                                                                                                                                                                                                                                                                                                                                                                                                                                                                                                                                                                                                                                                                                                                                                                                                                                                                                                                                                                                                                                                                                                                                                                                                                                                                                                                                                                                                                                                                                                                                                                                                                                                                                                                                                                                                                                                                                                                                                                                                                                                                                                                                                                                                                                                                                                                                                                                                                                                                                                                                                                                                                                                                                                                                                                                                                                                                                                                                                                                                                                                                                                                                                                                                                                                                           | C46H78O7   | 741.5697973 | No |
| 12599 | HMDB0116407                     | DG(13D5/11M3/0:0)                                                                                                                                                                                                                                                                                                                                                                                                                                                                                                                                                                                                                                                                                                                                                                                                                                                                                                                                                                                                                                                                                                                                                                                                                                                                                                                                                                                                                                                                                                                                                                                                                                                                                                                                                                                                                                                                                                                                                                                                                                                                                                                                                                                                                                                                                                                                                                                                                                                                                                                                                                                                                                                                                                                                                                                                                                                                                                                                                                                                                                                                                                                                                                                                                                                                                                                                                                                                                                                                                                                                                                                                                                                                                                                                                                                                                                                                                                                                                                                                                                                                                                                                                                                                                                                                                                                                                                                                                                                                                                                                                                                                                                                                                                                                                                                                                                                                                                                                                                                                                                                                                                                                                                                                                                                                                                                                                                                                                                                                                                                                                                                                                                                                                                                           | C46H78O7   | 741.5697973 | No |
| 12599 | HMDB0116413                     | DG(13D5/9M5/0:0)                                                                                                                                                                                                                                                                                                                                                                                                                                                                                                                                                                                                                                                                                                                                                                                                                                                                                                                                                                                                                                                                                                                                                                                                                                                                                                                                                                                                                                                                                                                                                                                                                                                                                                                                                                                                                                                                                                                                                                                                                                                                                                                                                                                                                                                                                                                                                                                                                                                                                                                                                                                                                                                                                                                                                                                                                                                                                                                                                                                                                                                                                                                                                                                                                                                                                                                                                                                                                                                                                                                                                                                                                                                                                                                                                                                                                                                                                                                                                                                                                                                                                                                                                                                                                                                                                                                                                                                                                                                                                                                                                                                                                                                                                                                                                                                                                                                                                                                                                                                                                                                                                                                                                                                                                                                                                                                                                                                                                                                                                                                                                                                                                                                                                                                            | C46H78O7   | 741.5697973 | No |
| 12599 | HMDB0116414                     | DG(13M5/11D3/0:0)                                                                                                                                                                                                                                                                                                                                                                                                                                                                                                                                                                                                                                                                                                                                                                                                                                                                                                                                                                                                                                                                                                                                                                                                                                                                                                                                                                                                                                                                                                                                                                                                                                                                                                                                                                                                                                                                                                                                                                                                                                                                                                                                                                                                                                                                                                                                                                                                                                                                                                                                                                                                                                                                                                                                                                                                                                                                                                                                                                                                                                                                                                                                                                                                                                                                                                                                                                                                                                                                                                                                                                                                                                                                                                                                                                                                                                                                                                                                                                                                                                                                                                                                                                                                                                                                                                                                                                                                                                                                                                                                                                                                                                                                                                                                                                                                                                                                                                                                                                                                                                                                                                                                                                                                                                                                                                                                                                                                                                                                                                                                                                                                                                                                                                                           | C46H78O7   | 741.5697973 | No |
| 12599 | HMDB0116436                     | DG(9D5/13M5/0:0)                                                                                                                                                                                                                                                                                                                                                                                                                                                                                                                                                                                                                                                                                                                                                                                                                                                                                                                                                                                                                                                                                                                                                                                                                                                                                                                                                                                                                                                                                                                                                                                                                                                                                                                                                                                                                                                                                                                                                                                                                                                                                                                                                                                                                                                                                                                                                                                                                                                                                                                                                                                                                                                                                                                                                                                                                                                                                                                                                                                                                                                                                                                                                                                                                                                                                                                                                                                                                                                                                                                                                                                                                                                                                                                                                                                                                                                                                                                                                                                                                                                                                                                                                                                                                                                                                                                                                                                                                                                                                                                                                                                                                                                                                                                                                                                                                                                                                                                                                                                                                                                                                                                                                                                                                                                                                                                                                                                                                                                                                                                                                                                                                                                                                                                            | C46H78O7   | 741.5697973 | No |
| 12599 | HMDB0116444                     | DG(9M5/13D5/0:0)                                                                                                                                                                                                                                                                                                                                                                                                                                                                                                                                                                                                                                                                                                                                                                                                                                                                                                                                                                                                                                                                                                                                                                                                                                                                                                                                                                                                                                                                                                                                                                                                                                                                                                                                                                                                                                                                                                                                                                                                                                                                                                                                                                                                                                                                                                                                                                                                                                                                                                                                                                                                                                                                                                                                                                                                                                                                                                                                                                                                                                                                                                                                                                                                                                                                                                                                                                                                                                                                                                                                                                                                                                                                                                                                                                                                                                                                                                                                                                                                                                                                                                                                                                                                                                                                                                                                                                                                                                                                                                                                                                                                                                                                                                                                                                                                                                                                                                                                                                                                                                                                                                                                                                                                                                                                                                                                                                                                                                                                                                                                                                                                                                                                                                                            | C46H78O7   | 741.5697973 | No |
| 12632 | HMDB0010576                     | PG(16:0/18:3(6Z,9Z,12Z))                                                                                                                                                                                                                                                                                                                                                                                                                                                                                                                                                                                                                                                                                                                                                                                                                                                                                                                                                                                                                                                                                                                                                                                                                                                                                                                                                                                                                                                                                                                                                                                                                                                                                                                                                                                                                                                                                                                                                                                                                                                                                                                                                                                                                                                                                                                                                                                                                                                                                                                                                                                                                                                                                                                                                                                                                                                                                                                                                                                                                                                                                                                                                                                                                                                                                                                                                                                                                                                                                                                                                                                                                                                                                                                                                                                                                                                                                                                                                                                                                                                                                                                                                                                                                                                                                                                                                                                                                                                                                                                                                                                                                                                                                                                                                                                                                                                                                                                                                                                                                                                                                                                                                                                                                                                                                                                                                                                                                                                                                                                                                                                                                                                                                                                    | C40H73O10P | 743.4869512 | No |
| 12632 | HMDB0010577                     | PG(16:0/18:3(9Z,12Z,15Z))                                                                                                                                                                                                                                                                                                                                                                                                                                                                                                                                                                                                                                                                                                                                                                                                                                                                                                                                                                                                                                                                                                                                                                                                                                                                                                                                                                                                                                                                                                                                                                                                                                                                                                                                                                                                                                                                                                                                                                                                                                                                                                                                                                                                                                                                                                                                                                                                                                                                                                                                                                                                                                                                                                                                                                                                                                                                                                                                                                                                                                                                                                                                                                                                                                                                                                                                                                                                                                                                                                                                                                                                                                                                                                                                                                                                                                                                                                                                                                                                                                                                                                                                                                                                                                                                                                                                                                                                                                                                                                                                                                                                                                                                                                                                                                                                                                                                                                                                                                                                                                                                                                                                                                                                                                                                                                                                                                                                                                                                                                                                                                                                                                                                                                                   | C40H73O10P | 743.4869512 | No |
| 12632 | HMDB0010590                     | PG(16:1(9Z)/18:2(9Z,12Z))                                                                                                                                                                                                                                                                                                                                                                                                                                                                                                                                                                                                                                                                                                                                                                                                                                                                                                                                                                                                                                                                                                                                                                                                                                                                                                                                                                                                                                                                                                                                                                                                                                                                                                                                                                                                                                                                                                                                                                                                                                                                                                                                                                                                                                                                                                                                                                                                                                                                                                                                                                                                                                                                                                                                                                                                                                                                                                                                                                                                                                                                                                                                                                                                                                                                                                                                                                                                                                                                                                                                                                                                                                                                                                                                                                                                                                                                                                                                                                                                                                                                                                                                                                                                                                                                                                                                                                                                                                                                                                                                                                                                                                                                                                                                                                                                                                                                                                                                                                                                                                                                                                                                                                                                                                                                                                                                                                                                                                                                                                                                                                                                                                                                                                                   | C40H73O10P | 743.4869512 | No |
| 12632 | HMDB0010646                     | PG(18:2(9Z,12Z)/16:1(9Z))                                                                                                                                                                                                                                                                                                                                                                                                                                                                                                                                                                                                                                                                                                                                                                                                                                                                                                                                                                                                                                                                                                                                                                                                                                                                                                                                                                                                                                                                                                                                                                                                                                                                                                                                                                                                                                                                                                                                                                                                                                                                                                                                                                                                                                                                                                                                                                                                                                                                                                                                                                                                                                                                                                                                                                                                                                                                                                                                                                                                                                                                                                                                                                                                                                                                                                                                                                                                                                                                                                                                                                                                                                                                                                                                                                                                                                                                                                                                                                                                                                                                                                                                                                                                                                                                                                                                                                                                                                                                                                                                                                                                                                                                                                                                                                                                                                                                                                                                                                                                                                                                                                                                                                                                                                                                                                                                                                                                                                                                                                                                                                                                                                                                                                                   | C40H73O10P | 743.4869512 | No |
| 12632 | HMDB0010660                     | PG(18:3(6Z,9Z,12Z)/16:0)                                                                                                                                                                                                                                                                                                                                                                                                                                                                                                                                                                                                                                                                                                                                                                                                                                                                                                                                                                                                                                                                                                                                                                                                                                                                                                                                                                                                                                                                                                                                                                                                                                                                                                                                                                                                                                                                                                                                                                                                                                                                                                                                                                                                                                                                                                                                                                                                                                                                                                                                                                                                                                                                                                                                                                                                                                                                                                                                                                                                                                                                                                                                                                                                                                                                                                                                                                                                                                                                                                                                                                                                                                                                                                                                                                                                                                                                                                                                                                                                                                                                                                                                                                                                                                                                                                                                                                                                                                                                                                                                                                                                                                                                                                                                                                                                                                                                                                                                                                                                                                                                                                                                                                                                                                                                                                                                                                                                                                                                                                                                                                                                                                                                                                                    | C40H73O10P | 743.4869512 | No |
| 12632 | HMDB0010675                     | PG(18:3(9Z,12Z,15Z)/16:0)                                                                                                                                                                                                                                                                                                                                                                                                                                                                                                                                                                                                                                                                                                                                                                                                                                                                                                                                                                                                                                                                                                                                                                                                                                                                                                                                                                                                                                                                                                                                                                                                                                                                                                                                                                                                                                                                                                                                                                                                                                                                                                                                                                                                                                                                                                                                                                                                                                                                                                                                                                                                                                                                                                                                                                                                                                                                                                                                                                                                                                                                                                                                                                                                                                                                                                                                                                                                                                                                                                                                                                                                                                                                                                                                                                                                                                                                                                                                                                                                                                                                                                                                                                                                                                                                                                                                                                                                                                                                                                                                                                                                                                                                                                                                                                                                                                                                                                                                                                                                                                                                                                                                                                                                                                                                                                                                                                                                                                                                                                                                                                                                                                                                                                                   | C40H73O10P | 743.4869512 | No |
| 12657 | HMDB0030642                     | Bisisodiospyrin                                                                                                                                                                                                                                                                                                                                                                                                                                                                                                                                                                                                                                                                                                                                                                                                                                                                                                                                                                                                                                                                                                                                                                                                                                                                                                                                                                                                                                                                                                                                                                                                                                                                                                                                                                                                                                                                                                                                                                                                                                                                                                                                                                                                                                                                                                                                                                                                                                                                                                                                                                                                                                                                                                                                                                                                                                                                                                                                                                                                                                                                                                                                                                                                                                                                                                                                                                                                                                                                                                                                                                                                                                                                                                                                                                                                                                                                                                                                                                                                                                                                                                                                                                                                                                                                                                                                                                                                                                                                                                                                                                                                                                                                                                                                                                                                                                                                                                                                                                                                                                                                                                                                                                                                                                                                                                                                                                                                                                                                                                                                                                                                                                                                                                                             | C44H26O12  | 745.1351181 | No |
| 12677 | HMDB0034699                     | Fumonisin A2                                                                                                                                                                                                                                                                                                                                                                                                                                                                                                                                                                                                                                                                                                                                                                                                                                                                                                                                                                                                                                                                                                                                                                                                                                                                                                                                                                                                                                                                                                                                                                                                                                                                                                                                                                                                                                                                                                                                                                                                                                                                                                                                                                                                                                                                                                                                                                                                                                                                                                                                                                                                                                                                                                                                                                                                                                                                                                                                                                                                                                                                                                                                                                                                                                                                                                                                                                                                                                                                                                                                                                                                                                                                                                                                                                                                                                                                                                                                                                                                                                                                                                                                                                                                                                                                                                                                                                                                                                                                                                                                                                                                                                                                                                                                                                                                                                                                                                                                                                                                                                                                                                                                                                                                                                                                                                                                                                                                                                                                                                                                                                                                                                                                                                                                | C36H61NO15 | 746.3940239 | No |
| 12681 | HMDB0015342; C06912; CHEBI:3732 | Clarithromycin                                                                                                                                                                                                                                                                                                                                                                                                                                                                                                                                                                                                                                                                                                                                                                                                                                                                                                                                                                                                                                                                                                                                                                                                                                                                                                                                                                                                                                                                                                                                                                                                                                                                                                                                                                                                                                                                                                                                                                                                                                                                                                                                                                                                                                                                                                                                                                                                                                                                                                                                                                                                                                                                                                                                                                                                                                                                                                                                                                                                                                                                                                                                                                                                                                                                                                                                                                                                                                                                                                                                                                                                                                                                                                                                                                                                                                                                                                                                                                                                                                                                                                                                                                                                                                                                                                                                                                                                                                                                                                                                                                                                                                                                                                                                                                                                                                                                                                                                                                                                                                                                                                                                                                                                                                                                                                                                                                                                                                                                                                                                                                                                                                                                                                                              | C38H69NO13 | 746.4690965 | No |
| 12684 | HMDB0126176                     | 6-{2-[6-carboxy-5-(2,4-dihydroxyphenyl)-3-(hydroxymethyl)but-2-en-1-yl]oxy}-2-methyl-4-hydroxy-3-methyl-5-(2,4-dihydroxyphenyl)-3-methyl-4-hydroxy-2-methyl-5-(2,4-dihydroxyphenyl)-3-methyl-4-hydroxy-2-methyl-5-(2,4-dihydroxyphenyl)-3-methyl-4-hydroxy-2-methyl-5-(2,4-dihydroxyphenyl)-3-methyl-4-hydroxy-2-methyl-5-(2,4-dihydroxyphenyl)-3-methyl-4-hydroxy-2-methyl-5-(2,4-dihydroxyphenyl)-3-methyl-4-hydroxy-2-methyl-5-(2,4-dihydroxyphenyl)-3-methyl-4-hydroxy-2-methyl-5-(2,4-dihydroxyphenyl)-3-methyl-4-hydroxy-2-methyl-5-(2,4-dihydroxyphenyl)-3-methyl-4-hydroxy-2-methyl-5-(2,4-dihydroxyphenyl)-3-methyl-4-hydroxy-2-methyl-5-(2,4-dihydroxyphenyl)-3-methyl-4-hydroxy-2-methyl-5-(2,4-dihydroxyphenyl)-3-methyl-4-hydroxy-2-methyl-5-(2,4-dihydroxyphenyl)-3-methyl-4-hydroxy-2-methyl-5-(2,4-dihydroxyphenyl)-3-methyl-4-hydroxy-2-methyl-5-(2,4-dihydroxyphenyl)-3-methyl-4-hydroxy-2-methyl-5-(2,4-dihydroxyphenyl)-3-methyl-4-hydroxy-2-methyl-5-(2,4-dihydroxyphenyl)-3-methyl-4-hydroxy-2-methyl-5-(2,4-dihydroxyphenyl)-3-methyl-4-hydroxy-2-methyl-5-(2,4-dihydroxyphenyl)-3-methyl-4-hydroxy-2-methyl-5-(2,4-dihydroxyphenyl)-3-methyl-4-hydroxy-2-methyl-5-(2,4-dihydroxyphenyl)-3-methyl-4-hydroxy-2-methyl-5-(2,4-dihydroxyphenyl)-3-methyl-4-hydroxy-2-methyl-5-(2,4-dihydroxyphenyl)-3-methyl-4-hydroxy-2-methyl-5-(2,4-dihydroxyphenyl)-3-methyl-4-hydroxy-2-methyl-5-(2,4-dihydroxyphenyl)-3-methyl-4-hydroxy-2-methyl-5-(2,4-dihydroxyphenyl)-3-methyl-4-hydroxy-2-methyl-5-(2,4-dihydroxyphenyl)-3-methyl-4-hydroxy-2-methyl-5-(2,4-dihydroxyphenyl)-3-methyl-4-hydroxy-2-methyl-5-(2,4-dihydroxyphenyl)-3-methyl-4-hydroxy-2-methyl-5-(2,4-dihydroxyphenyl)-3-methyl-4-hydroxy-2-methyl-5-(2,4-dihydroxyphenyl)-3-methyl-4-hydroxy-2-methyl-5-(2,4-dihydroxyphenyl)-3-methyl-4-hydroxy-2-methyl-5-(2,4-dihydroxyphenyl)-3-methyl-4-hydroxy-2-methyl-5-(2,4-dihydroxyphenyl)-3-methyl-4-hydroxy-2-methyl-5-(2,4-dihydroxyphenyl)-3-methyl-4-hydroxy-2-methyl-5-(2,4-dihydroxyphenyl)-3-methyl-4-hydroxy-2-methyl-5-(2,4-dihydroxyphenyl)-3-methyl-4-hydroxy-2-methyl-5-(2,4-dihydroxyphenyl)-3-methyl-4-hydroxy-2-methyl-5-(2,4-dihydroxyphenyl)-3-methyl-4-hydroxy-2-methyl-5-(2,4-dihydroxyphenyl)-3-methyl-4-hydroxy-2-methyl-5-(2,4-dihydroxyphenyl)-3-methyl-4-hydroxy-2-methyl-5-(2,4-dihydroxyphenyl)-3-methyl-4-hydroxy-2-methyl-5-(2,4-dihydroxyphenyl)-3-methyl-4-hydroxy-2-methyl-5-(2,4-dihydroxyphenyl)-3-methyl-4-hydroxy-2-methyl-5-(2,4-dihydroxyphenyl)-3-methyl-4-hydroxy-2-methyl-5-(2,4-dihydroxyphenyl)-3-methyl-4-hydroxy-2-methyl-5-(2,4-dihydroxyphenyl)-3-methyl-4-hydroxy-2-methyl-5-(2,4-dihydroxyphenyl)-3-methyl-4-hydroxy-2-methyl-5-(2,4-dihydroxyphenyl)-3-methyl-4-hydroxy-2-methyl-5-(2,4-dihydroxyphenyl)-3-methyl-4-hydroxy-2-methyl-5-(2,4-dihydroxyphenyl)-3-methyl-4-hydroxy-2-methyl-5-(2,4-dihydroxyphenyl)-3-methyl-4-hydroxy-2-methyl-5-(2,4-dihydroxyphenyl)-3-methyl-4-hydroxy-2-methyl-5-(2,4-dihydroxyphenyl)-3-methyl-4-hydroxy-2-methyl-5-(2,4-dihydroxyphenyl)-3-methyl-4-hydroxy-2-methyl-5-(2,4-dihydroxyphenyl)-3-methyl-4-hydroxy-2-methyl-5-(2,4-dihydroxyphenyl)-3-methyl-4-hydroxy-2-methyl-5-(2,4-dihydroxyphenyl)-3-methyl-4-hydroxy-2-methyl-5-(2,4-dihydroxyphenyl)-3-methyl-4-hydroxy-2-methyl-5-(2,4-dihydroxyphenyl)-3-methyl-4-hydroxy-2-methyl-5-(2,4-dihydroxyphenyl)-3-methyl-4-hydroxy-2-methyl-5-(2,4-dihydroxyphenyl)-3-methyl-4-hydroxy-2-methyl-5-(2,4-dihydroxyphenyl)-3-methyl-4-hydroxy-2-methyl-5-(2,4-dihydroxyphenyl)-3-methyl-4-hydroxy-2-methyl-5-(2,4-dihydroxyphenyl)-3-methyl-4-hydroxy-2-methyl-5-(2,4-dihydroxyphenyl)-3-methyl-4-hydroxy-2-methyl-5-(2,4-dihydroxyphenyl)-3-methyl-4-hydroxy-2-methyl-5-(2,4-dihydroxyphenyl)-3-methyl-4-hydroxy-2-methyl-5-(2,4-dihydroxyphenyl)-3-methyl-4-hydroxy-2-methyl-5-(2,4-dihydroxyphenyl)-3-methyl-4-hydroxy-2-methyl-5-(2,4-dihydroxyphenyl)-3-methyl-4-hydroxy-2-methyl-5-(2,4-dihydroxyphenyl)-3-methyl-4-hydroxy-2-methyl-5-(2,4-dihydroxyphenyl)-3-methyl-4-hydroxy-2-methyl-5-(2,4-dihydroxyphenyl)-3-methyl-4-hydroxy-2-methyl-5-(2,4-dihydroxyphenyl)-3-methyl-4-hydroxy-2-methyl-5-(2,4-dihydroxyphenyl)-3-methyl-4-hydroxy-2-methyl-5-(2,4-dihydroxyphenyl)-3-methyl-4-hydroxy-2-methyl-5-(2,4-dihydroxyphenyl)-3-methyl-4-hydroxy-2-methyl-5-(2,4-dihydroxyphenyl)-3-methyl-4-hydroxy-2-methyl-5-(2,4-dihydroxyphenyl)-3-methyl-4-hydroxy-2-methyl-5-(2,4-dihydroxyphenyl)-3-methyl-4-hydroxy-2-methyl-5-(2,4-dihydroxyphenyl)-3-methyl-4-hydroxy-2-methyl-5-(2,4-dihydroxyphenyl)-3-methyl-4-hydroxy-2-methyl-5-(2,4-dihydroxyphenyl)-3-methyl-4-hydroxy-2-methyl-5-(2,4-dihydroxyphenyl)-3-methyl-4-hydroxy-2-methyl-5-(2,4-dihydroxyphenyl)-3-methyl-4-hydroxy-2-methyl-5-(2,4-dihydroxyphenyl)-3-methyl-4-hydroxy-2-methyl-5-(2,4-dihydroxyphenyl)-3-methyl-4-hydroxy-2-methyl-5-(2,4-dihydroxyphenyl)-3-methyl-4-hydroxy-2-methyl-5-(2,4-dihydroxyphenyl)-3-methyl-4-hydroxy-2-methyl-5-(2,4-dihydroxyphenyl)-3-methyl-4-hydroxy-2-methyl-5-(2,4-dihydroxyphenyl)-3-methyl-4-hydroxy-2-methyl-5-(2,4-dihydroxyphenyl)-3-methyl-4-hydroxy-2-methyl-5-(2,4-dihydroxyphenyl)-3-methyl-4-hydroxy-2-methyl-5-(2,4-dihydroxyphenyl)-3-methyl-4-hydroxy-2-methyl-5-(2,4-dihydroxyphenyl)-3-methyl-4-hydroxy-2-methyl-5-(2,4-dihydroxyphenyl)-3-methyl-4-hydroxy-2-methyl-5-(2,4-dihydroxyphenyl)-3-methyl-4-hydroxy-2-methyl-5-(2,4-dihydroxyphenyl)-3-methyl-4-hydroxy-2-methyl-5-(2,4-dihydroxyphenyl)-3-methyl-4-hydroxy-2-methyl-5-(2,4-dihydroxyphenyl)-3-methyl-4-hydroxy-2-methyl-5-(2,4-dihydroxyphenyl)-3-methyl-4-hydroxy-2-methyl-5-(2,4-dihydroxyphenyl)-3-methyl-4-hydroxy-2-methyl-5-(2,4-dihydroxyphenyl)-3-methyl-4-hydroxy-2-methyl-5-( |            |             |    |

|       |                                 |                                                                   |             |    |
|-------|---------------------------------|-------------------------------------------------------------------|-------------|----|
| 12684 | HMDB0126187                     | 6-(2-{4-[5,6-dihydroxy-7-(3-methylbut-2-en-1-yl)-1-ber C39H40O15  | 747.2297024 | No |
| 12684 | HMDB0126188                     | 6-{2-[6-carboxy-5-(2,4-dihydroxyphenyl)-4-hydroxy-3-r C39H40O15   | 747.2297024 | No |
| 12684 | HMDB0126189                     | 6-[4-(6-carboxy-5-{2,6-dihydroxy-4-[6-hydroxy-7-(3-me C39H40O15   | 747.2297024 | No |
| 12684 | HMDB0126190                     | 6-{2-[6-carboxy-5-(2,6-dihydroxy-4-[6-hydroxy-7-(3-me C39H40O15   | 747.2297024 | No |
| 12684 | HMDB0126191                     | 6-[(2-{4-[6-carboxy-5-(2,4-dihydroxyphenyl)-4-hydroxy C39H40O15   | 747.2297024 | No |
| 12684 | HMDB0126192                     | 6-(2-{2,6-dihydroxy-4-[6-hydroxy-7-(3-methylbut-2-en- C39H40O15   | 747.2297024 | No |
| 12684 | HMDB0126194                     | 6-{2-[6-carboxy-5-(2,4-dihydroxyphenyl)-3-methylcyclc C39H40O15   | 747.2297024 | No |
| 12684 | HMDB0126195                     | 6-[4-(6-carboxy-5-{2,6-dihydroxy-4-[6-hydroxy-7-(4-hy C39H40O15   | 747.2297024 | No |
| 12684 | HMDB0126196                     | 6-{2-[6-carboxy-5-(2,6-dihydroxy-4-[6-hydroxy-7-(4-hy C39H40O15   | 747.2297024 | No |
| 12684 | HMDB0126197                     | 6-[(2-{4-[6-carboxy-5-(2,4-dihydroxyphenyl)-3-methylc C39H40O15   | 747.2297024 | No |
| 12684 | HMDB0126198                     | 6-(2-{2,6-dihydroxy-4-[6-hydroxy-7-(4-hydroxy-3-meth C39H40O15    | 747.2297024 | No |
| 12684 | HMDB0126200                     | 6-{2-[6-carboxy-5-(2,4-dihydroxyphenyl)-3-methylcyclc C39H40O15   | 747.2297024 | No |
| 12684 | HMDB0126201                     | 6-{4-[6-carboxy-5-(2,6-dihydroxy-4-{6-hydroxy-7-[(2E)- C39H40O15  | 747.2297024 | No |
| 12684 | HMDB0126202                     | 6-{2-[6-carboxy-5-(2,6-dihydroxy-4-{6-hydroxy-7-[(2E)- C39H40O15  | 747.2297024 | No |
| 12684 | HMDB0126203                     | 6-[(2-{4-[6-carboxy-5-(2,4-dihydroxyphenyl)-3-methylc C39H40O15   | 747.2297024 | No |
| 12684 | HMDB0126204                     | 6-[2-(2,6-dihydroxy-4-{6-hydroxy-7-[(2E)-4-hydroxy-3-r C39H40O15  | 747.2297024 | No |
| 12684 | HMDB0126206                     | 6-{2-[6-carboxy-5-(2,4-dihydroxyphenyl)-5-hydroxy-3-r C39H40O15   | 747.2297024 | No |
| 12684 | HMDB0126207                     | 6-[4-(6-carboxy-5-{2,6-dihydroxy-4-[6-hydroxy-7-(3-me C39H40O15   | 747.2297024 | No |
| 12684 | HMDB0126208                     | 6-[2-(6-carboxy-5-{2,6-dihydroxy-4-[6-hydroxy-7-(3-me C39H40O15   | 747.2297024 | No |
| 12684 | HMDB0126209                     | 6-[(2-{4-[6-carboxy-5-(2,4-dihydroxyphenyl)-5-hydroxy C39H40O15   | 747.2297024 | No |
| 12684 | HMDB0126210                     | 6-(2-{2,6-dihydroxy-4-[6-hydroxy-7-(3-methylbut-2-en- C39H40O15   | 747.2297024 | No |
| 12684 | HMDB0126211                     | 6-{2-[6-carboxy-5-(2,4-dihydroxyphenyl)-3-methylcyclc C39H40O15   | 747.2297024 | No |
| 12684 | HMDB0126212                     | 6-{4-[6-carboxy-5-(4-{7-[(3,3-dimethyloxiran-2-yl)meth C39H40O15  | 747.2297024 | No |
| 12684 | HMDB0126213                     | 6-{2-[6-carboxy-5-(4-{7-[(3,3-dimethyloxiran-2-yl)meth C39H40O15  | 747.2297024 | No |
| 12684 | HMDB0126214                     | 6-[(2-{4-[6-carboxy-5-(2,4-dihydroxyphenyl)-3-methylc C39H40O15   | 747.2297024 | No |
| 12684 | HMDB0126215                     | 6-[6-(2,4-dihydroxyphenyl)-2-(4-{7-[(3,3-dimethyloxira C39H40O15  | 747.2297024 | No |
| 12684 | HMDB0126216                     | 2-{2-[(6-carboxy-3,4,5-trihydroxyoxan-2-yl)oxy]-6-hydr C39H40O15  | 747.2297024 | No |
| 12684 | HMDB0126217                     | 4-{4-[(6-carboxy-3,4,5-trihydroxyoxan-2-yl)oxy]-2-hydr C39H40O15  | 747.2297024 | No |
| 12684 | HMDB0126218                     | 4-{2-[(6-carboxy-3,4,5-trihydroxyoxan-2-yl)oxy]-4-hydr C39H40O15  | 747.2297024 | No |
| 12684 | HMDB0126219                     | 2-{4-[6-[(6-carboxy-3,4,5-trihydroxyoxan-2-yl)oxy]-7-(3 C39H40O15 | 747.2297024 | No |
| 12684 | HMDB0126220                     | 6-(2-{2,6-dihydroxy-4-[6-hydroxy-7-(3-methylbut-2-en- C39H40O15   | 747.2297024 | No |
| 12684 | HMDB0126221                     | 6-{3-[6-carboxy-5-(2,4-dihydroxyphenyl)-3-methylcyclc C39H40O15   | 747.2297024 | No |
| 12684 | HMDB0126222                     | 6-{2-[6-carboxy-5-(2,4-dihydroxyphenyl)-3-methylcyclc C39H40O15   | 747.2297024 | No |
| 12684 | HMDB0126223                     | 6-[4-(6-carboxy-3-methyl-5-{2,3,6-trihydroxy-4-[6-hydr C39H40O15  | 747.2297024 | No |
| 12684 | HMDB0126224                     | 6-[2-(6-carboxy-3-methyl-5-{2,3,6-trihydroxy-4-[6-hydr C39H40O15  | 747.2297024 | No |
| 12684 | HMDB0126225                     | 6-{2-[6-carboxy-5-(2,4-dihydroxyphenyl)-3-methylcyclc C39H40O15   | 747.2297024 | No |
| 12684 | HMDB0126226                     | 6-[(2-{4-[6-carboxy-5-(2,4-dihydroxyphenyl)-3-methylc C39H40O15   | 747.2297024 | No |
| 12684 | HMDB0126227                     | 6-[6-(2,4-dihydroxyphenyl)-4-methyl-2-{2,3,6-trihydro C39H40O15   | 747.2297024 | No |
| 12684 | HMDB0126229                     | 6-[5-(6-carboxy-5-{2,6-dihydroxy-4-[6-hydroxy-7-(3-me C39H40O15   | 747.2297024 | No |
| 12684 | HMDB0126230                     | 6-{2-[6-carboxy-3-methyl-5-(2,4,5-trihydroxyphenyl)cy C39H40O15   | 747.2297024 | No |
| 12684 | HMDB0126231                     | 6-[4-(6-carboxy-5-{2,6-dihydroxy-4-[6-hydroxy-7-(3-me C39H40O15   | 747.2297024 | No |
| 12684 | HMDB0126232                     | 6-[2-(6-carboxy-5-(2,6-dihydroxy-4-[6-hydroxy-7-(3-me C39H40O15   | 747.2297024 | No |
| 12684 | HMDB0126233                     | 6-[(2-{4-[6-carboxy-3-methyl-5-(2,4,5-trihydroxypheny C39H40O15   | 747.2297024 | No |
| 12684 | HMDB0126234                     | 6-(2-{2,6-dihydroxy-4-[6-hydroxy-7-(3-methylbut-2-en- C39H40O15   | 747.2297024 | No |
| 12684 | HMDB0126236                     | 6-{2-[6-carboxy-5-(2,4-dihydroxyphenyl)-6-hydroxy-3-r C39H40O15   | 747.2297024 | No |
| 12684 | HMDB0126237                     | 6-[4-(6-carboxy-5-{2,6-dihydroxy-4-[6-hydroxy-7-(3-me C39H40O15   | 747.2297024 | No |
| 12684 | HMDB0126238                     | 6-[2-(6-carboxy-5-{2,6-dihydroxy-4-[6-hydroxy-7-(3-me C39H40O15   | 747.2297024 | No |
| 12684 | HMDB0126239                     | 6-[(2-{4-[6-carboxy-5-(2,4-dihydroxyphenyl)-6-hydroxy C39H40O15   | 747.2297024 | No |
| 12684 | HMDB0126240                     | 6-(2-{2,6-dihydroxy-4-[6-hydroxy-7-(3-methylbut-2-en- C39H40O15   | 747.2297024 | No |
| 12687 | HMDB0001916; C06838             | Azythromycin C38H72N2O12                                          | 747.4989032 | No |
| 12687 | HMDB0014352; C06838; CHEBI:2955 | Azithromycin C38H72N2O12                                          | 747.4989032 | No |
| 12687 | HMDB0114893                     | PA(18:0/22:6(4Z,7Z,10Z,13Z,16Z,19Z)) C43H73O8P                    | 747.4989032 | No |
| 12687 | HMDB0114916                     | PA(18:1(11Z)/22:5(4Z,7Z,10Z,13Z,16Z)) C43H73O8P                   | 747.4989032 | No |
| 12687 | HMDB0114917                     | PA(18:1(11Z)/22:5(7Z,10Z,13Z,16Z,19Z)) C43H73O8P                  | 747.4989032 | No |
| 12687 | HMDB0114941                     | PA(18:1(9Z)/22:5(4Z,7Z,10Z,13Z,16Z)) C43H73O8P                    | 747.4989032 | No |
| 12687 | HMDB0114942                     | PA(18:1(9Z)/22:5(7Z,10Z,13Z,16Z,19Z)) C43H73O8P                   | 747.4989032 | No |
| 12687 | HMDB0114967                     | PA(18:2(9Z,12Z)/22:4(7Z,10Z,13Z,16Z)) C43H73O8P                   | 747.4989032 | No |
| 12687 | HMDB0115047                     | PA(18:4(6Z,9Z,12Z,15Z)/22:2(13Z,16Z)) C43H73O8P                   | 747.4989032 | No |
| 12687 | HMDB0115108                     | PA(20:1(11Z)/20:5(5Z,8Z,11Z,14Z,17Z)) C43H73O8P                   | 747.4989032 | No |
| 12687 | HMDB0115132                     | PA(20:3(5Z,8Z,11Z)/20:3(5Z,8Z,11Z)) C43H73O8P                     | 747.4989032 | No |
| 12687 | HMDB0115210                     | PA(20:5(5Z,8Z,11Z,14Z,17Z)/20:1(11Z)) C43H73O8P                   | 747.4989032 | No |

|       |                     |                                        |            |             |    |
|-------|---------------------|----------------------------------------|------------|-------------|----|
| 12687 | HMDB0115307         | PA(22:2(13Z,16Z)/18:4(6Z,9Z,12Z,15Z))  | C43H73O8P  | 747.4989032 | No |
| 12687 | HMDB0115331         | PA(22:4(7Z,10Z,13Z,16Z)/18:2(9Z,12Z))  | C43H73O8P  | 747.4989032 | No |
| 12687 | HMDB0115355         | PA(22:5(4Z,7Z,10Z,13Z,16Z)/18:1(11Z))  | C43H73O8P  | 747.4989032 | No |
| 12687 | HMDB0115356         | PA(22:5(4Z,7Z,10Z,13Z,16Z)/18:1(9Z))   | C43H73O8P  | 747.4989032 | No |
| 12687 | HMDB0115381         | PA(22:5(7Z,10Z,13Z,16Z,19Z)/18:1(11Z)) | C43H73O8P  | 747.4989032 | No |
| 12687 | HMDB0115382         | PA(22:5(7Z,10Z,13Z,16Z,19Z)/18:1(9Z))  | C43H73O8P  | 747.4989032 | No |
| 12687 | HMDB0115406         | PA(22:6(4Z,7Z,10Z,13Z,16Z,19Z)/18:0)   | C43H73O8P  | 747.4989032 | No |
| 12687 | HMDB0115494         | PA(20:3(5Z,8Z,11Z)/20:3(8Z,11Z,14Z))   | C43H73O8P  | 747.4989032 | No |
| 12687 | HMDB0115496         | PA(20:3(8Z,11Z,14Z)/20:3(5Z,8Z,11Z))   | C43H73O8P  | 747.4989032 | No |
| 12687 | HMDB0115497         | PA(20:3(8Z,11Z,14Z)/20:3(8Z,11Z,14Z))  | C43H73O8P  | 747.4989032 | No |
| 12687 | HMDB0115498         | PA(20:4(5Z,8Z,11Z,14Z)/20:2(11Z,14Z))  | C43H73O8P  | 747.4989032 | No |
| 12687 | HMDB0115500         | PA(20:4(8Z,11Z,14Z,17Z)/20:2(11Z,14Z)) | C43H73O8P  | 747.4989032 | No |
| 12687 | HMDB0115548         | PA(20:2(11Z,14Z)/20:4(5Z,8Z,11Z,14Z))  | C43H73O8P  | 747.4989032 | No |
| 12687 | HMDB0115549         | PA(20:2(11Z,14Z)/20:4(8Z,11Z,14Z,17Z)) | C43H73O8P  | 747.4989032 | No |
| 12688 | HMDB0030449         | 20-Deoxynarasin                        | C43H72O10  | 747.5064032 | No |
| 12689 | HMDB0010573         | PG(16:0/18:1(11Z))                     | C40H77O10P | 747.5158519 | No |
| 12689 | HMDB0010574         | PG(16:0/18:1(9Z))                      | C40H77O10P | 747.5158519 | No |
| 12689 | HMDB0010587         | PG(16:1(9Z)/18:0)                      | C40H77O10P | 747.5158519 | No |
| 12689 | HMDB0010601         | PG(18:0/16:1(9Z))                      | C40H77O10P | 747.5158519 | No |
| 12689 | HMDB0010615         | PG(18:1(11Z)/16:0)                     | C40H77O10P | 747.5158519 | No |
| 12689 | HMDB0010630         | PG(18:1(9Z)/16:0)                      | C40H77O10P | 747.5158519 | No |
| 12701 | HMDB0009413; C00350 | PE(20:4(5Z,8Z,11Z,14Z)/P-18:1(11Z))    | C43H76NO7P | 748.5278911 | No |
| 12701 | HMDB0009414; C00350 | PE(20:4(5Z,8Z,11Z,14Z)/P-18:1(9Z))     | C43H76NO7P | 748.5278911 | No |
| 12701 | HMDB0009446; C00350 | PE(20:4(8Z,11Z,14Z,17Z)/P-18:1(11Z))   | C43H76NO7P | 748.5278911 | No |
| 12701 | HMDB0009447; C00350 | PE(20:4(8Z,11Z,14Z,17Z)/P-18:1(9Z))    | C43H76NO7P | 748.5278911 | No |
| 12701 | HMDB0009478; C00350 | PE(20:5(5Z,8Z,11Z,14Z,17Z)/P-18:0)     | C43H76NO7P | 748.5278911 | No |
| 12701 | HMDB0009642; C00350 | PE(22:5(4Z,7Z,10Z,13Z,16Z)/P-16:0)     | C43H76NO7P | 748.5278911 | No |
| 12701 | HMDB0009675; C00350 | PE(22:5(7Z,10Z,13Z,16Z,19Z)/P-16:0)    | C43H76NO7P | 748.5278911 | No |
| 12701 | HMDB0011359         | PE(P-16:0/22:5(4Z,7Z,10Z,13Z,16Z))     | C43H76NO7P | 748.5278911 | No |
| 12701 | HMDB0011360         | PE(P-16:0/22:5(7Z,10Z,13Z,16Z,19Z))    | C43H76NO7P | 748.5278911 | No |
| 12701 | HMDB0011387         | PE(P-18:0/20:5(5Z,8Z,11Z,14Z,17Z))     | C43H76NO7P | 748.5278911 | No |
| 12701 | HMDB0011418         | PE(P-18:1(11Z)/20:4(5Z,8Z,11Z,14Z))    | C43H76NO7P | 748.5278911 | No |
| 12701 | HMDB0011419         | PE(P-18:1(11Z)/20:4(8Z,11Z,14Z,17Z))   | C43H76NO7P | 748.5278911 | No |
| 12701 | HMDB0011451         | PE(P-18:1(9Z)/20:4(5Z,8Z,11Z,14Z))     | C43H76NO7P | 748.5278911 | No |
| 12701 | HMDB0011452         | PE(P-18:1(9Z)/20:4(8Z,11Z,14Z,17Z))    | C43H76NO7P | 748.5278911 | No |
| 12712 | HMDB0114891         | PA(18:0/22:5(4Z,7Z,10Z,13Z,16Z))       | C43H75O8P  | 749.514689  | No |
| 12712 | HMDB0114892         | PA(18:0/22:5(7Z,10Z,13Z,16Z,19Z))      | C43H75O8P  | 749.514689  | No |
| 12712 | HMDB0114915         | PA(18:1(11Z)/22:4(7Z,10Z,13Z,16Z))     | C43H75O8P  | 749.514689  | No |
| 12712 | HMDB0114940         | PA(18:1(9Z)/22:4(7Z,10Z,13Z,16Z))      | C43H75O8P  | 749.514689  | No |
| 12712 | HMDB0114993         | PA(18:3(6Z,9Z,12Z)/22:2(13Z,16Z))      | C43H75O8P  | 749.514689  | No |
| 12712 | HMDB0115020         | PA(18:3(9Z,12Z,15Z)/22:2(13Z,16Z))     | C43H75O8P  | 749.514689  | No |
| 12712 | HMDB0115046         | PA(18:4(6Z,9Z,12Z,15Z)/22:1(13Z))      | C43H75O8P  | 749.514689  | No |
| 12712 | HMDB0115080         | PA(20:0/20:5(5Z,8Z,11Z,14Z,17Z))       | C43H75O8P  | 749.514689  | No |
| 12712 | HMDB0115106         | PA(20:1(11Z)/20:4(5Z,8Z,11Z,14Z))      | C43H75O8P  | 749.514689  | No |
| 12712 | HMDB0115107         | PA(20:1(11Z)/20:4(8Z,11Z,14Z,17Z))     | C43H75O8P  | 749.514689  | No |
| 12712 | HMDB0115157         | PA(20:4(5Z,8Z,11Z,14Z)/20:1(11Z))      | C43H75O8P  | 749.514689  | No |
| 12712 | HMDB0115184         | PA(20:4(8Z,11Z,14Z,17Z)/20:1(11Z))     | C43H75O8P  | 749.514689  | No |
| 12712 | HMDB0115209         | PA(20:5(5Z,8Z,11Z,14Z,17Z)/20:0)       | C43H75O8P  | 749.514689  | No |
| 12712 | HMDB0115281         | PA(22:1(13Z)/18:4(6Z,9Z,12Z,15Z))      | C43H75O8P  | 749.514689  | No |
| 12712 | HMDB0115305         | PA(22:2(13Z,16Z)/18:3(6Z,9Z,12Z))      | C43H75O8P  | 749.514689  | No |
| 12712 | HMDB0115306         | PA(22:2(13Z,16Z)/18:3(9Z,12Z,15Z))     | C43H75O8P  | 749.514689  | No |
| 12712 | HMDB0115329         | PA(22:4(7Z,10Z,13Z,16Z)/18:1(11Z))     | C43H75O8P  | 749.514689  | No |
| 12712 | HMDB0115330         | PA(22:4(7Z,10Z,13Z,16Z)/18:1(9Z))      | C43H75O8P  | 749.514689  | No |
| 12712 | HMDB0115354         | PA(22:5(4Z,7Z,10Z,13Z,16Z)/18:0)       | C43H75O8P  | 749.514689  | No |
| 12712 | HMDB0115380         | PA(22:5(7Z,10Z,13Z,16Z,19Z)/18:0)      | C43H75O8P  | 749.514689  | No |
| 12712 | HMDB0115546         | PA(20:2(11Z,14Z)/20:3(5Z,8Z,11Z))      | C43H75O8P  | 749.514689  | No |
| 12712 | HMDB0115547         | PA(20:2(11Z,14Z)/20:3(8Z,11Z,14Z))     | C43H75O8P  | 749.514689  | No |
| 12712 | HMDB0115560         | PA(20:3(5Z,8Z,11Z)/20:2(11Z,14Z))      | C43H75O8P  | 749.514689  | No |
| 12712 | HMDB0115574         | PA(20:3(8Z,11Z,14Z)/20:2(11Z,14Z))     | C43H75O8P  | 749.514689  | No |
| 12743 | HMDB0007883; C00157 | PC(14:0/20:4(5Z,8Z,11Z,14Z))           | C42H76NO8P | 752.5243301 | No |
| 12743 | HMDB0007884; C00157 | PC(14:0/20:4(8Z,11Z,14Z,17Z))          | C42H76NO8P | 752.5243301 | No |

|       |                          |                                                 |            |             |    |
|-------|--------------------------|-------------------------------------------------|------------|-------------|----|
| 12743 | HMDB0007914; C00157      | PC(14:1(9Z)/20:3(5Z,8Z,11Z))                    | C42H76NO8P | 752.5243301 | No |
| 12743 | HMDB0007915; C00157      | PC(14:1(9Z)/20:3(8Z,11Z,14Z))                   | C42H76NO8P | 752.5243301 | No |
| 12743 | HMDB0007976; C00157      | PC(16:0/18:4(6Z,9Z,12Z,15Z))                    | C42H76NO8P | 752.5243301 | No |
| 12743 | HMDB0008007; C00157      | PC(16:1(9Z)/18:3(6Z,9Z,12Z))                    | C42H76NO8P | 752.5243301 | No |
| 12743 | HMDB0008008; C00157      | PC(16:1(9Z)/18:3(9Z,12Z,15Z))                   | C42H76NO8P | 752.5243301 | No |
| 12743 | HMDB0008167; C00157      | PC(18:3(6Z,9Z,12Z)/16:1(9Z))                    | C42H76NO8P | 752.5243301 | No |
| 12743 | HMDB0008200; C00157      | PC(18:3(9Z,12Z,15Z)/16:1(9Z))                   | C42H76NO8P | 752.5243301 | No |
| 12743 | HMDB0008232; C00157      | PC(18:4(6Z,9Z,12Z,15Z)/16:0)                    | C42H76NO8P | 752.5243301 | No |
| 12743 | HMDB0008362; C00157      | PC(20:3(5Z,8Z,11Z)/14:1(9Z))                    | C42H76NO8P | 752.5243301 | No |
| 12743 | HMDB0008395; C00157      | PC(20:3(8Z,11Z,14Z)/14:1(9Z))                   | C42H76NO8P | 752.5243301 | No |
| 12743 | HMDB0008426; C00157      | PC(20:4(5Z,8Z,11Z,14Z)/14:0)                    | C42H76NO8P | 752.5243301 | No |
| 12743 | HMDB0008459; C00157      | PC(20:4(8Z,11Z,14Z,17Z)/14:0)                   | C42H76NO8P | 752.5243301 | No |
| 12743 | HMDB0008910; C00350      | PE(15:0/22:4(7Z,10Z,13Z,16Z))                   | C42H76NO8P | 752.5243301 | No |
| 12743 | HMDB0009582; C00350      | PE(22:4(7Z,10Z,13Z,16Z)/15:0)                   | C42H76NO8P | 752.5243301 | No |
| 12743 | HMDB0112993              | PE-NMe(14:0/22:4(7Z,10Z,13Z,16Z))               | C42H76NO8P | 752.5243301 | No |
| 12743 | HMDB0113050              | PE-NMe(16:0/20:4(5Z,8Z,11Z,14Z))                | C42H76NO8P | 752.5243301 | No |
| 12743 | HMDB0113070              | PE-NMe(16:1(9Z)/20:3(5Z,8Z,11Z))                | C42H76NO8P | 752.5243301 | No |
| 12743 | HMDB0113071              | PE-NMe(16:1(9Z)/20:3(8Z,11Z,14Z))               | C42H76NO8P | 752.5243301 | No |
| 12743 | HMDB0113092              | PE-NMe(18:0/18:4(6Z,9Z,12Z,15Z))                | C42H76NO8P | 752.5243301 | No |
| 12743 | HMDB0113117              | PE-NMe(18:1(11Z)/18:3(6Z,9Z,12Z))               | C42H76NO8P | 752.5243301 | No |
| 12743 | HMDB0113118              | PE-NMe(18:1(11Z)/18:3(9Z,12Z,15Z))              | C42H76NO8P | 752.5243301 | No |
| 12743 | HMDB0113144              | PE-NMe(18:1(9Z)/18:3(6Z,9Z,12Z))                | C42H76NO8P | 752.5243301 | No |
| 12743 | HMDB0113145              | PE-NMe(18:1(9Z)/18:3(9Z,12Z,15Z))               | C42H76NO8P | 752.5243301 | No |
| 12743 | HMDB0113172              | PE-NMe(18:2(9Z,12Z)/18:2(9Z,12Z))               | C42H76NO8P | 752.5243301 | No |
| 12743 | HMDB0113199              | PE-NMe(18:3(6Z,9Z,12Z)/18:1(11Z))               | C42H76NO8P | 752.5243301 | No |
| 12743 | HMDB0113200              | PE-NMe(18:3(6Z,9Z,12Z)/18:1(9Z))                | C42H76NO8P | 752.5243301 | No |
| 12743 | HMDB0113227              | PE-NMe(18:3(9Z,12Z,15Z)/18:1(11Z))              | C42H76NO8P | 752.5243301 | No |
| 12743 | HMDB0113228              | PE-NMe(18:3(9Z,12Z,15Z)/18:1(9Z))               | C42H76NO8P | 752.5243301 | No |
| 12743 | HMDB0113255              | PE-NMe(18:4(6Z,9Z,12Z,15Z)/18:0)                | C42H76NO8P | 752.5243301 | No |
| 12743 | HMDB0113370              | PE-NMe(20:3(5Z,8Z,11Z)/16:1(9Z))                | C42H76NO8P | 752.5243301 | No |
| 12743 | HMDB0113398              | PE-NMe(20:3(8Z,11Z,14Z)/16:1(9Z))               | C42H76NO8P | 752.5243301 | No |
| 12743 | HMDB0113425              | PE-NMe(20:4(5Z,8Z,11Z,14Z)/16:0)                | C42H76NO8P | 752.5243301 | No |
| 12743 | HMDB0113453              | PE-NMe(20:4(8Z,11Z,14Z,17Z)/16:0)               | C42H76NO8P | 752.5243301 | No |
| 12743 | HMDB0113592              | PE-NMe(22:4(7Z,10Z,13Z,16Z)/14:0)               | C42H76NO8P | 752.5243301 | No |
| 12743 | HMDB0113928              | PE-NMe2(15:0/20:4(5Z,8Z,11Z,14Z))               | C42H76NO8P | 752.5243301 | No |
| 12743 | HMDB0113929              | PE-NMe2(15:0/20:4(8Z,11Z,14Z,17Z))              | C42H76NO8P | 752.5243301 | No |
| 12743 | HMDB0114326              | PE-NMe2(20:4(5Z,8Z,11Z,14Z)/15:0)               | C42H76NO8P | 752.5243301 | No |
| 12743 | HMDB0114354              | PE-NMe2(20:4(8Z,11Z,14Z,17Z)/15:0)              | C42H76NO8P | 752.5243301 | No |
| 12743 | HMDB0116725              | PE-NMe(16:0/20:4(8Z,11Z,14Z,17Z))               | C42H76NO8P | 752.5243301 | No |
| 12750 | HMDB0034994; C17544      | Chikusetsusaponin Ia                            | C41H70O12  | 753.4778137 | No |
| 12750 | HMDB0062593; CHEBI:77491 | Ginsenoside Mc                                  | C41H70O12  | 753.4778137 | No |
| 12782 | HMDB0009203; C00350      | PE(18:4(6Z,9Z,12Z,15Z)/20:5(5Z,8Z,11Z,14Z,17Z)) | C43H68NO8P | 756.4631955 | No |
| 12782 | HMDB0009459; C00350      | PE(20:5(5Z,8Z,11Z,14Z,17Z)/18:4(6Z,9Z,12Z,15Z)) | C43H68NO8P | 756.4631955 | No |
| 12785 | HMDB0007880; C00157      | PC(14:0/20:2(11Z,14Z))                          | C42H80NO8P | 756.552258  | No |
| 12785 | HMDB0007912; C00157      | PC(14:1(9Z)/20:1(11Z))                          | C42H80NO8P | 756.552258  | No |
| 12785 | HMDB0007973; C00157      | PC(16:0/18:2(9Z,12Z))                           | C42H80NO8P | 756.552258  | No |
| 12785 | HMDB0008004; C00157      | PC(16:1(9Z)/18:1(11Z))                          | C42H80NO8P | 756.552258  | No |
| 12785 | HMDB0008005; C00157      | PC(16:1(9Z)/18:1(9Z))                           | C42H80NO8P | 756.552258  | No |
| 12785 | HMDB0008068; C00157      | PC(18:1(11Z)/16:1(9Z))                          | C42H80NO8P | 756.552258  | No |
| 12785 | HMDB0008101; C00157      | PC(18:1(9Z)/16:1(9Z))                           | C42H80NO8P | 756.552258  | No |
| 12785 | HMDB0008133; C00157      | PC(18:2(9Z,12Z)/16:0)                           | C42H80NO8P | 756.552258  | No |
| 12785 | HMDB0008296; C00157      | PC(20:1(11Z)/14:1(9Z))                          | C42H80NO8P | 756.552258  | No |
| 12785 | HMDB0008328; C00157      | PC(20:2(11Z,14Z)/14:0)                          | C42H80NO8P | 756.552258  | No |
| 12785 | HMDB0008909; C00350      | PE(15:0/22:2(13Z,16Z))                          | C42H80NO8P | 756.552258  | No |
| 12785 | HMDB0009549; C00350      | PE(22:2(13Z,16Z)/15:0)                          | C42H80NO8P | 756.552258  | No |
| 12785 | HMDB0010565              | PE-NMe(18:1(9Z)/18:1(9Z))                       | C42H80NO8P | 756.552258  | No |
| 12785 | HMDB0112966              | PE-NMe(16:1(9Z)/20:1(11Z))                      | C42H80NO8P | 756.552258  | No |
| 12785 | HMDB0112967              | PE-NMe(18:1(9Z)/18:1(11Z))                      | C42H80NO8P | 756.552258  | No |
| 12785 | HMDB0112968              | PE-NMe(18:1(11Z)/18:1(9Z))                      | C42H80NO8P | 756.552258  | No |
| 12785 | HMDB0112969              | PE-NMe(18:1(11Z)/18:1(11Z))                     | C42H80NO8P | 756.552258  | No |
| 12785 | HMDB0112992              | PE-NMe(14:0/22:2(13Z,16Z))                      | C42H80NO8P | 756.552258  | No |

|       |                          |                                                  |             |             |    |
|-------|--------------------------|--------------------------------------------------|-------------|-------------|----|
| 12785 | HMDB0113010              | PE-NMe(14:1(9Z)/22:1(13Z))                       | C42H80NO8P  | 756.552258  | No |
| 12785 | HMDB0113047              | PE-NMe(16:0/20:2(11Z,14Z))                       | C42H80NO8P  | 756.552258  | No |
| 12785 | HMDB0113089              | PE-NMe(18:0/18:2(9Z,12Z))                        | C42H80NO8P  | 756.552258  | No |
| 12785 | HMDB0113169              | PE-NMe(18:2(9Z,12Z)/18:0)                        | C42H80NO8P  | 756.552258  | No |
| 12785 | HMDB0113312              | PE-NMe(20:1(11Z)/16:1(9Z))                       | C42H80NO8P  | 756.552258  | No |
| 12785 | HMDB0113340              | PE-NMe(20:2(11Z,14Z)/16:0)                       | C42H80NO8P  | 756.552258  | No |
| 12785 | HMDB0113536              | PE-NMe(22:1(13Z)/14:1(9Z))                       | C42H80NO8P  | 756.552258  | No |
| 12785 | HMDB0113563              | PE-NMe(22:2(13Z,16Z)/14:0)                       | C42H80NO8P  | 756.552258  | No |
| 12785 | HMDB0113925              | PE-NMe2(15:0/20:2(11Z,14Z))                      | C42H80NO8P  | 756.552258  | No |
| 12785 | HMDB0114241              | PE-NMe2(20:2(11Z,14Z)/15:0)                      | C42H80NO8P  | 756.552258  | No |
| 12809 | HMDB0009137; C00350      | PE(18:3(6Z,9Z,12Z)/20:5(5Z,8Z,11Z,14Z,17Z))      | C43H70NO8P  | 758.4757498 | No |
| 12809 | HMDB0009170; C00350      | PE(18:3(9Z,12Z,15Z)/20:5(5Z,8Z,11Z,14Z,17Z))     | C43H70NO8P  | 758.4757498 | No |
| 12809 | HMDB0009201; C00350      | PE(18:4(6Z,9Z,12Z,15Z)/20:4(5Z,8Z,11Z,14Z))      | C43H70NO8P  | 758.4757498 | No |
| 12809 | HMDB0009202; C00350      | PE(18:4(6Z,9Z,12Z,15Z)/20:4(8Z,11Z,14Z,17Z))     | C43H70NO8P  | 758.4757498 | No |
| 12809 | HMDB0009393; C00350      | PE(20:4(5Z,8Z,11Z,14Z)/18:4(6Z,9Z,12Z,15Z))      | C43H70NO8P  | 758.4757498 | No |
| 12809 | HMDB0009426; C00350      | PE(20:4(8Z,11Z,14Z,17Z)/18:4(6Z,9Z,12Z,15Z))     | C43H70NO8P  | 758.4757498 | No |
| 12809 | HMDB0009457; C00350      | PE(20:5(5Z,8Z,11Z,14Z,17Z)/18:3(6Z,9Z,12Z))      | C43H70NO8P  | 758.4757498 | No |
| 12809 | HMDB0009458; C00350      | PE(20:5(5Z,8Z,11Z,14Z,17Z)/18:3(9Z,12Z,15Z))     | C43H70NO8P  | 758.4757498 | No |
| 12809 | HMDB0114163              | PE-NMe2(18:4(6Z,9Z,12Z,15Z)/18:4(6Z,9Z,12Z,15Z)) | C43H70NO8P  | 758.4757498 | No |
| 12816 | HMDB0007879; C00157      | PC(14:0/20:1(11Z))                               | C42H82NO8P  | 758.5716296 | No |
| 12816 | HMDB0007911; C00157      | PC(14:1(9Z)/20:0)                                | C42H82NO8P  | 758.5716296 | No |
| 12816 | HMDB0007971; C00157      | PC(16:0/18:1(11Z))                               | C42H82NO8P  | 758.5716296 | No |
| 12816 | HMDB0007972; C00157      | PC(16:0/18:1(9Z))                                | C42H82NO8P  | 758.5716296 | No |
| 12816 | HMDB0008003; C00157      | PC(16:1(9Z)/18:0)                                | C42H82NO8P  | 758.5716296 | No |
| 12816 | HMDB0008035; C00157      | PC(18:0/16:1(9Z))                                | C42H82NO8P  | 758.5716296 | No |
| 12816 | HMDB0008067; C00157      | PC(18:1(11Z)/16:0)                               | C42H82NO8P  | 758.5716296 | No |
| 12816 | HMDB0008100; C00157      | PC(18:1(9Z)/16:0)                                | C42H82NO8P  | 758.5716296 | No |
| 12816 | HMDB0008263; C00157      | PC(20:0/14:1(9Z))                                | C42H82NO8P  | 758.5716296 | No |
| 12816 | HMDB0008295; C00157      | PC(20:1(11Z)/14:0)                               | C42H82NO8P  | 758.5716296 | No |
| 12816 | HMDB0008908; C00350      | PE(15:0/22:1(13Z))                               | C42H82NO8P  | 758.5716296 | No |
| 12816 | HMDB0009516; C00350      | PE(22:1(13Z)/15:0)                               | C42H82NO8P  | 758.5716296 | No |
| 12816 | HMDB0112970              | PE-NMe(18:0/18:1(9Z))                            | C42H82NO8P  | 758.5716296 | No |
| 12816 | HMDB0112971              | PE-NMe(18:0/18:1(11Z))                           | C42H82NO8P  | 758.5716296 | No |
| 12816 | HMDB0112972              | PE-NMe(14:1(9Z)/22:0)                            | C42H82NO8P  | 758.5716296 | No |
| 12816 | HMDB0112973              | PE-NMe(16:0/20:1(11Z))                           | C42H82NO8P  | 758.5716296 | No |
| 12816 | HMDB0112974              | PE-NMe(16:1(9Z)/20:0)                            | C42H82NO8P  | 758.5716296 | No |
| 12816 | HMDB0112991              | PE-NMe(14:0/22:1(13Z))                           | C42H82NO8P  | 758.5716296 | No |
| 12816 | HMDB0113115              | PE-NMe(18:1(11Z)/18:0)                           | C42H82NO8P  | 758.5716296 | No |
| 12816 | HMDB0113142              | PE-NMe(18:1(9Z)/18:0)                            | C42H82NO8P  | 758.5716296 | No |
| 12816 | HMDB0113283              | PE-NMe(20:0/16:1(9Z))                            | C42H82NO8P  | 758.5716296 | No |
| 12816 | HMDB0113311              | PE-NMe(20:1(11Z)/16:0)                           | C42H82NO8P  | 758.5716296 | No |
| 12816 | HMDB0113509              | PE-NMe(22:0/14:1(9Z))                            | C42H82NO8P  | 758.5716296 | No |
| 12816 | HMDB0113535              | PE-NMe(22:1(13Z)/14:0)                           | C42H82NO8P  | 758.5716296 | No |
| 12816 | HMDB0113864              | PE-NMe2(15:0/20:1(11Z))                          | C42H82NO8P  | 758.5716296 | No |
| 12816 | HMDB0114212              | PE-NMe2(20:1(11Z)/15:0)                          | C42H82NO8P  | 758.5716296 | No |
| 12827 | HMDB0007645              | DG(22:1(13Z)/24:1(15Z)/0:0)                      | C49H92O5    | 759.6858172 | No |
| 12827 | HMDB0007673              | DG(22:2(13Z,16Z)/24:0/0:0)                       | C49H92O5    | 759.6858172 | No |
| 12827 | HMDB0007813              | DG(24:0/22:2(13Z,16Z)/0:0)                       | C49H92O5    | 759.6858172 | No |
| 12827 | HMDB0007841              | DG(24:1(15Z)/22:1(13Z)/0:0)                      | C49H92O5    | 759.6858172 | No |
| 12827 | HMDB0047907              | TG(14:1(9Z)/14:1(9Z)/o-18:0)                     | C49H92O5    | 759.6858172 | No |
| 12827 | HMDB0048391              | TG(14:1(9Z)/o-18:0/14:1(9Z))                     | C49H92O5    | 759.6858172 | No |
| 12827 | HMDB0056125              | DG(24:0/0:0/22:2n6)                              | C49H92O5    | 759.6858172 | No |
| 12827 | HMDB0056252              | DG(22:1n9/0:0/24:1n9)                            | C49H92O5    | 759.6858172 | No |
| 12840 | HMDB0012357; CHEBI:34086 | PS(16:0/18:1(9Z))                                | C40H76NO10P | 760.5116753 | No |
| 12840 | HMDB0012367              | PS(16:1(9Z)/18:0)                                | C40H76NO10P | 760.5116753 | No |
| 12840 | HMDB0012377              | PS(18:0/16:1(9Z))                                | C40H76NO10P | 760.5116753 | No |
| 12840 | HMDB0012387              | PS(18:1(9Z)/16:0)                                | C40H76NO10P | 760.5116753 | No |
| 12840 | HMDB0112267              | PS(16:0/18:1(11Z))                               | C40H76NO10P | 760.5116753 | No |
| 12840 | HMDB0112270              | PS(18:1(11Z)/16:0)                               | C40H76NO10P | 760.5116753 | No |
| 12840 | HMDB0112274              | PS(14:0/20:1(11Z))                               | C40H76NO10P | 760.5116753 | No |
| 12840 | HMDB0112277              | PS(14:1(9Z)/20:0)                                | C40H76NO10P | 760.5116753 | No |

|       |                          |                                           |             |             |    |
|-------|--------------------------|-------------------------------------------|-------------|-------------|----|
| 12840 | HMDB0112512              | PS(20:0/14:1(9Z))                         | C40H76NO10P | 760.5116753 | No |
| 12840 | HMDB0112540              | PS(20:1(11Z)/14:0)                        | C40H76NO10P | 760.5116753 | No |
| 12841 | HMDB0012357; CHEBI:34086 | PS(16:0/18:1(9Z))                         | C40H76NO10P | 760.5153277 | No |
| 12841 | HMDB0012367              | PS(16:1(9Z)/18:0)                         | C40H76NO10P | 760.5153277 | No |
| 12841 | HMDB0012377              | PS(18:0/16:1(9Z))                         | C40H76NO10P | 760.5153277 | No |
| 12841 | HMDB0012387              | PS(18:1(9Z)/16:0)                         | C40H76NO10P | 760.5153277 | No |
| 12841 | HMDB0112267              | PS(16:0/18:1(11Z))                        | C40H76NO10P | 760.5153277 | No |
| 12841 | HMDB0112270              | PS(18:1(11Z)/16:0)                        | C40H76NO10P | 760.5153277 | No |
| 12841 | HMDB0112274              | PS(14:0/20:1(11Z))                        | C40H76NO10P | 760.5153277 | No |
| 12841 | HMDB0112277              | PS(14:1(9Z)/20:0)                         | C40H76NO10P | 760.5153277 | No |
| 12841 | HMDB0112512              | PS(20:0/14:1(9Z))                         | C40H76NO10P | 760.5153277 | No |
| 12841 | HMDB0112540              | PS(20:1(11Z)/14:0)                        | C40H76NO10P | 760.5153277 | No |
| 12855 | HMDB0007616              | DG(22:0/24:1(15Z)/0:0)                    | C49H94O5    | 761.7019927 | No |
| 12855 | HMDB0007644              | DG(22:1(13Z)/24:0/0:0)                    | C49H94O5    | 761.7019927 | No |
| 12855 | HMDB0007812              | DG(24:0/22:1(13Z)/0:0)                    | C49H94O5    | 761.7019927 | No |
| 12855 | HMDB0007840              | DG(24:1(15Z)/22:0/0:0)                    | C49H94O5    | 761.7019927 | No |
| 12855 | HMDB0042300              | TG(14:0/14:1(9Z)/o-18:0)                  | C49H94O5    | 761.7019927 | No |
| 12855 | HMDB0042938              | TG(14:0/o-18:0/14:1(9Z))                  | C49H94O5    | 761.7019927 | No |
| 12855 | HMDB0047746              | TG(14:1(9Z)/14:0/o-18:0)                  | C49H94O5    | 761.7019927 | No |
| 12855 | HMDB0056096              | DG(22:0/0:0/24:1n9)                       | C49H94O5    | 761.7019927 | No |
| 12855 | HMDB0056118              | DG(24:0/0:0/22:1n9)                       | C49H94O5    | 761.7019927 | No |
| 12862 | HMDB0061019              | 14-hydroxycyclarithromycin                | C38H69NO14  | 762.4637652 | No |
| 12906 | HMDB0010666              | PG(18:3(6Z,9Z,12Z)/18:3(6Z,9Z,12Z))       | C42H71O10P  | 765.4719982 | No |
| 12906 | HMDB0010667              | PG(18:3(6Z,9Z,12Z)/18:3(9Z,12Z,15Z))      | C42H71O10P  | 765.4719982 | No |
| 12906 | HMDB0010681              | PG(18:3(9Z,12Z,15Z)/18:3(6Z,9Z,12Z))      | C42H71O10P  | 765.4719982 | No |
| 12906 | HMDB0010682              | PG(18:3(9Z,12Z,15Z)/18:3(9Z,12Z,15Z))     | C42H71O10P  | 765.4719982 | No |
| 12909 | HMDB0047902              | TG(14:1(9Z)/14:1(9Z)/18:4(6Z,9Z,12Z,15Z)) | C49H82O6    | 765.6024704 | No |
| 12909 | HMDB0048276              | TG(14:1(9Z)/18:4(6Z,9Z,12Z,15Z)/14:1(9Z)) | C49H82O6    | 765.6024704 | No |
| 12910 | HMDB0031939              | Arachisprenol 11                          | C55H90O     | 765.6923837 | No |
| 12927 | HMDB0010595              | PG(16:1(9Z)/20:4(5Z,8Z,11Z,14Z))          | C42H73O10P  | 767.4844496 | No |
| 12927 | HMDB0010651              | PG(18:2(9Z,12Z)/18:3(6Z,9Z,12Z))          | C42H73O10P  | 767.4844496 | No |
| 12927 | HMDB0010652              | PG(18:2(9Z,12Z)/18:3(9Z,12Z,15Z))         | C42H73O10P  | 767.4844496 | No |
| 12927 | HMDB0010665              | PG(18:3(6Z,9Z,12Z)/18:2(9Z,12Z))          | C42H73O10P  | 767.4844496 | No |
| 12927 | HMDB0010680              | PG(18:3(9Z,12Z,15Z)/18:2(9Z,12Z))         | C42H73O10P  | 767.4844496 | No |
| 12927 | HMDB0116608              | PG(20:4(5Z,8Z,11Z,14Z)/16:1(9Z))          | C42H73O10P  | 767.4844496 | No |
| 12940 | HMDB0007947; C00157      | PC(15:0/20:3(5Z,8Z,11Z))                  | C43H80NO8P  | 768.5565072 | No |
| 12940 | HMDB0007948; C00157      | PC(15:0/20:3(8Z,11Z,14Z))                 | C43H80NO8P  | 768.5565072 | No |
| 12940 | HMDB0008363; C00157      | PC(20:3(5Z,8Z,11Z)/15:0)                  | C43H80NO8P  | 768.5565072 | No |
| 12940 | HMDB0008396; C00157      | PC(20:3(8Z,11Z,14Z)/15:0)                 | C43H80NO8P  | 768.5565072 | No |
| 12940 | HMDB0008975; C00350      | PE(16:1(9Z)/22:2(13Z,16Z))                | C43H80NO8P  | 768.5565072 | No |
| 12940 | HMDB0009001; C00350      | PE(18:0/20:3(5Z,8Z,11Z))                  | C43H80NO8P  | 768.5565072 | No |
| 12940 | HMDB0009002; C00350      | PE(18:0/20:3(8Z,11Z,14Z))                 | C43H80NO8P  | 768.5565072 | No |
| 12940 | HMDB0009033; C00350      | PE(18:1(11Z)/20:2(11Z,14Z))               | C43H80NO8P  | 768.5565072 | No |
| 12940 | HMDB0009066; C00350      | PE(18:1(9Z)/20:2(11Z,14Z))                | C43H80NO8P  | 768.5565072 | No |
| 12940 | HMDB0009098; C00350      | PE(18:2(9Z,12Z)/20:1(11Z))                | C43H80NO8P  | 768.5565072 | No |
| 12940 | HMDB0009130; C00350      | PE(18:3(6Z,9Z,12Z)/20:0)                  | C43H80NO8P  | 768.5565072 | No |
| 12940 | HMDB0009163; C00350      | PE(18:3(9Z,12Z,15Z)/20:0)                 | C43H80NO8P  | 768.5565072 | No |
| 12940 | HMDB0009226; C00350      | PE(20:0/18:3(6Z,9Z,12Z))                  | C43H80NO8P  | 768.5565072 | No |
| 12940 | HMDB0009227; C00350      | PE(20:0/18:3(9Z,12Z,15Z))                 | C43H80NO8P  | 768.5565072 | No |
| 12940 | HMDB0009258; C00350      | PE(20:1(11Z)/18:2(9Z,12Z))                | C43H80NO8P  | 768.5565072 | No |
| 12940 | HMDB0009289; C00350      | PE(20:2(11Z,14Z)/18:1(11Z))               | C43H80NO8P  | 768.5565072 | No |
| 12940 | HMDB0009290; C00350      | PE(20:2(11Z,14Z)/18:1(9Z))                | C43H80NO8P  | 768.5565072 | No |
| 12940 | HMDB0009321; C00350      | PE(20:3(5Z,8Z,11Z)/18:0)                  | C43H80NO8P  | 768.5565072 | No |
| 12940 | HMDB0009354; C00350      | PE(20:3(8Z,11Z,14Z)/18:0)                 | C43H80NO8P  | 768.5565072 | No |
| 12940 | HMDB0009551; C00350      | PE(22:2(13Z,16Z)/16:1(9Z))                | C43H80NO8P  | 768.5565072 | No |
| 12940 | HMDB0113911              | PE-NMe2(14:1(9Z)/22:2(13Z,16Z))           | C43H80NO8P  | 768.5565072 | No |
| 12940 | HMDB0113949              | PE-NMe2(16:0/20:3(5Z,8Z,11Z))             | C43H80NO8P  | 768.5565072 | No |
| 12940 | HMDB0113950              | PE-NMe2(16:0/20:3(8Z,11Z,14Z))            | C43H80NO8P  | 768.5565072 | No |
| 12940 | HMDB0113970              | PE-NMe2(16:1(9Z)/20:2(11Z,14Z))           | C43H80NO8P  | 768.5565072 | No |
| 12940 | HMDB0113991              | PE-NMe2(18:0/18:3(6Z,9Z,12Z))             | C43H80NO8P  | 768.5565072 | No |
| 12940 | HMDB0113992              | PE-NMe2(18:0/18:3(9Z,12Z,15Z))            | C43H80NO8P  | 768.5565072 | No |



|       |                                  |                                                                   |               |             |    |
|-------|----------------------------------|-------------------------------------------------------------------|---------------|-------------|----|
| 12940 | HMDB0114017                      | PE-NMe2(18:1(11Z)/18:2(9Z,12Z))                                   | C43H80NO8P    | 768.5565072 | No |
| 12940 | HMDB0114044                      | PE-NMe2(18:1(9Z)/18:2(9Z,12Z))                                    | C43H80NO8P    | 768.5565072 | No |
| 12940 | HMDB0114071                      | PE-NMe2(18:2(9Z,12Z)/18:1(11Z))                                   | C43H80NO8P    | 768.5565072 | No |
| 12940 | HMDB0114072                      | PE-NMe2(18:2(9Z,12Z)/18:1(9Z))                                    | C43H80NO8P    | 768.5565072 | No |
| 12940 | HMDB0114099                      | PE-NMe2(18:3(6Z,9Z,12Z)/18:0)                                     | C43H80NO8P    | 768.5565072 | No |
| 12940 | HMDB0114128                      | PE-NMe2(18:3(9Z,12Z,15Z)/18:0)                                    | C43H80NO8P    | 768.5565072 | No |
| 12940 | HMDB0114243                      | PE-NMe2(20:2(11Z,14Z)/16:1(9Z))                                   | C43H80NO8P    | 768.5565072 | No |
| 12940 | HMDB0114271                      | PE-NMe2(20:3(5Z,8Z,11Z)/16:0)                                     | C43H80NO8P    | 768.5565072 | No |
| 12940 | HMDB0114299                      | PE-NMe2(20:3(8Z,11Z,14Z)/16:0)                                    | C43H80NO8P    | 768.5565072 | No |
| 12940 | HMDB0114467                      | PE-NMe2(22:2(13Z,16Z)/14:1(9Z))                                   | C43H80NO8P    | 768.5565072 | No |
| 12969 | HMDB0032008                      | Kaempferol 3-sophorotrioside                                      | C33H40O21     | 771.2010566 | No |
| 12969 | HMDB0037207                      | Kaempferol 3-sophoroside 7-glucoside                              | C33H40O21     | 771.2010566 | No |
| 12969 | HMDB0037936                      | Quercetin 3-(2G-rhamnosylgentiobioside)                           | C33H40O21     | 771.2010566 | No |
| 12969 | HMDB0037957                      | Quercetin 3-rutinoside 7-galactoside                              | C33H40O21     | 771.2010566 | No |
| 12969 | HMDB0037960                      | Quercetin 3-(2G-glucosylrutinoside)                               | C33H40O21     | 771.2010566 | No |
| 12969 | HMDB0039363                      | Quercetin 3-(3R-glucosylrutinoside)                               | C33H40O21     | 771.2010566 | No |
| 12969 | HMDB0039375                      | Hyperin 6'''-[glucosyl-(1->3)-rhamnoside]                         | C33H40O21     | 771.2010566 | No |
| 12969 | HMDB0041771                      | Quercetin 3-O-glucosyl-rutinoside                                 | C33H40O21     | 771.2010566 | No |
| 12969 | HMDB0126861                      | 3,4,5-trihydroxy-6-[[5-hydroxy-2-(4-hydroxyphenyl)-4- C33H40O21   | C33H40O21     | 771.2010566 | No |
| 12969 | HMDB0126862                      | 6-(4-[5,7-dihydroxy-4-oxo-6,8-bis[3,4,5-trihydroxy-6-(h C33H40O21 | C33H40O21     | 771.2010566 | No |
| 12969 | HMDB0126863                      | 3,4,5-trihydroxy-6-[[7-hydroxy-2-(4-hydroxyphenyl)-4- C33H40O21   | C33H40O21     | 771.2010566 | No |
| 12969 | HMDB0135148                      | 3-[[3,4-dihydroxy-6-methyl-5-[[3,4,5-trihydroxy-6-(hyd C33H40O21  | C33H40O21     | 771.2010566 | No |
| 12969 | HMDB0136152                      | 7-[[3,4-dihydroxy-6-(hydroxymethyl)-5-[[3,4,5-trihydro C33H40O21  | C33H40O21     | 771.2010566 | No |
| 12989 | HMDB0116515                      | PGP(a-13:0/a-17:0)                                                | C36H72O13P2   | 773.4369424 | No |
| 12989 | HMDB0116523                      | PGP(a-13:0/i-17:0)                                                | C36H72O13P2   | 773.4369424 | No |
| 12989 | HMDB0116542                      | PGP(i-12:0/i-18:0)                                                | C36H72O13P2   | 773.4369424 | No |
| 12989 | HMDB0116551                      | PGP(i-13:0/a-17:0)                                                | C36H72O13P2   | 773.4369424 | No |
| 12989 | HMDB0116559                      | PGP(i-13:0/i-17:0)                                                | C36H72O13P2   | 773.4369424 | No |
| 12989 | HMDB0116573                      | PGP(i-14:0/i-16:0)                                                | C36H72O13P2   | 773.4369424 | No |
| 13005 | HMDB0007925; C00157              | PC(14:1(9Z)/22:6(4Z,7Z,10Z,13Z,16Z,19Z))                          | C44H74NO8P    | 774.5065271 | No |
| 13005 | HMDB0008174; C00157              | PC(18:3(6Z,9Z,12Z)/18:4(6Z,9Z,12Z,15Z))                           | C44H74NO8P    | 774.5065271 | No |
| 13005 | HMDB0008207; C00157              | PC(18:3(9Z,12Z,15Z)/18:4(6Z,9Z,12Z,15Z))                          | C44H74NO8P    | 774.5065271 | No |
| 13005 | HMDB0008238; C00157              | PC(18:4(6Z,9Z,12Z,15Z)/18:3(6Z,9Z,12Z))                           | C44H74NO8P    | 774.5065271 | No |
| 13005 | HMDB0008239; C00157              | PC(18:4(6Z,9Z,12Z,15Z)/18:3(9Z,12Z,15Z))                          | C44H74NO8P    | 774.5065271 | No |
| 13005 | HMDB0008723; C00157              | PC(22:6(4Z,7Z,10Z,13Z,16Z,19Z)/14:1(9Z))                          | C44H74NO8P    | 774.5065271 | No |
| 13005 | HMDB0113081                      | PE-NMe(16:1(9Z)/22:6(4Z,7Z,10Z,13Z,16Z,19Z))                      | C44H74NO8P    | 774.5065271 | No |
| 13005 | HMDB0113183                      | PE-NMe(18:2(9Z,12Z)/20:5(5Z,8Z,11Z,14Z,17Z))                      | C44H74NO8P    | 774.5065271 | No |
| 13005 | HMDB0113209                      | PE-NMe(18:3(6Z,9Z,12Z)/20:4(5Z,8Z,11Z,14Z))                       | C44H74NO8P    | 774.5065271 | No |
| 13005 | HMDB0113210                      | PE-NMe(18:3(6Z,9Z,12Z)/20:4(8Z,11Z,14Z,17Z))                      | C44H74NO8P    | 774.5065271 | No |
| 13005 | HMDB0113238                      | PE-NMe(18:3(9Z,12Z,15Z)/20:4(5Z,8Z,11Z,14Z))                      | C44H74NO8P    | 774.5065271 | No |
| 13005 | HMDB0113239                      | PE-NMe(18:3(9Z,12Z,15Z)/20:4(8Z,11Z,14Z,17Z))                     | C44H74NO8P    | 774.5065271 | No |
| 13005 | HMDB0113265                      | PE-NMe(18:4(6Z,9Z,12Z,15Z)/20:3(5Z,8Z,11Z))                       | C44H74NO8P    | 774.5065271 | No |
| 13005 | HMDB0113266                      | PE-NMe(18:4(6Z,9Z,12Z,15Z)/20:3(8Z,11Z,14Z))                      | C44H74NO8P    | 774.5065271 | No |
| 13005 | HMDB0113377                      | PE-NMe(20:3(5Z,8Z,11Z)/18:4(6Z,9Z,12Z,15Z))                       | C44H74NO8P    | 774.5065271 | No |
| 13005 | HMDB0113405                      | PE-NMe(20:3(8Z,11Z,14Z)/18:4(6Z,9Z,12Z,15Z))                      | C44H74NO8P    | 774.5065271 | No |
| 13005 | HMDB0113431                      | PE-NMe(20:4(5Z,8Z,11Z,14Z)/18:3(6Z,9Z,12Z))                       | C44H74NO8P    | 774.5065271 | No |
| 13005 | HMDB0113432                      | PE-NMe(20:4(5Z,8Z,11Z,14Z)/18:3(9Z,12Z,15Z))                      | C44H74NO8P    | 774.5065271 | No |
| 13005 | HMDB0113459                      | PE-NMe(20:4(8Z,11Z,14Z,17Z)/18:3(6Z,9Z,12Z))                      | C44H74NO8P    | 774.5065271 | No |
| 13005 | HMDB0113460                      | PE-NMe(20:4(8Z,11Z,14Z,17Z)/18:3(9Z,12Z,15Z))                     | C44H74NO8P    | 774.5065271 | No |
| 13005 | HMDB0113487                      | PE-NMe(20:5(5Z,8Z,11Z,14Z,17Z)/18:2(9Z,12Z))                      | C44H74NO8P    | 774.5065271 | No |
| 13005 | HMDB0113677                      | PE-NMe(22:6(4Z,7Z,10Z,13Z,16Z,19Z)/16:1(9Z))                      | C44H74NO8P    | 774.5065271 | No |
| 13097 | HMDB0040398                      | 1alpha,3beta,22R-Trihydroxyergosta-5,24E-dien-26-oi C40H64O15     | C40H64O15     | 783.4153318 | No |
| 13146 | HMDB0039118                      | Delphinidin 3-sophoroside 5-glucoside                             | C33H41O22     | 788.2011587 | No |
| 13151 | HMDB0006796; C06198; CHEBI:27791 | P1,P4-Bis(5''-uridy)l tetraphosphate                              | C18H26N4O23P4 | 788.9881032 | No |
| 13160 | HMDB0042100                      | TG(14:0/15:0/18:1(11Z))                                           | C50H94O6      | 789.6973161 | No |
| 13160 | HMDB0042101                      | TG(14:0/15:0/18:1(9Z))                                            | C50H94O6      | 789.6973161 | No |
| 13160 | HMDB0042332                      | TG(14:0/18:1(11Z)/15:0)                                           | C50H94O6      | 789.6973161 | No |
| 13160 | HMDB0042362                      | TG(14:0/18:1(9Z)/15:0)                                            | C50H94O6      | 789.6973161 | No |
| 13160 | HMDB0042968                      | TG(15:0/14:0/18:1(11Z))                                           | C50H94O6      | 789.6973161 | No |
| 13160 | HMDB0042969                      | TG(15:0/14:0/18:1(9Z))                                            | C50H94O6      | 789.6973161 | No |
| 13160 | HMDB0043025                      | TG(15:0/16:0/16:1(9Z))                                            | C50H94O6      | 789.6973161 | No |

|       |                     |                                            |            |             |    |
|-------|---------------------|--------------------------------------------|------------|-------------|----|
| 13160 | HMDB0043053         | TG(15:0/18:0/14:1(9Z))                     | C50H94O6   | 789.6973161 | No |
| 13160 | HMDB0043165         | TG(15:0/14:1(9Z)/18:0)                     | C50H94O6   | 789.6973161 | No |
| 13160 | HMDB0043193         | TG(15:0/16:1(9Z)/16:0)                     | C50H94O6   | 789.6973161 | No |
| 13160 | HMDB0043863         | TG(16:0/15:0/16:1(9Z))                     | C50H94O6   | 789.6973161 | No |
| 13160 | HMDB0044699         | TG(18:0/15:0/14:1(9Z))                     | C50H94O6   | 789.6973161 | No |
| 13170 | HMDB0007958; C00157 | PC(15:0/22:6(4Z,7Z,10Z,13Z,16Z,19Z))       | C45H78NO8P | 790.5373548 | No |
| 13170 | HMDB0008724; C00157 | PC(22:6(4Z,7Z,10Z,13Z,16Z,19Z)/15:0)       | C45H78NO8P | 790.5373548 | No |
| 13170 | HMDB0009012; C00350 | PE(18:0/22:6(4Z,7Z,10Z,13Z,16Z,19Z))       | C45H78NO8P | 790.5373548 | No |
| 13170 | HMDB0009043; C00350 | PE(18:1(11Z)/22:5(4Z,7Z,10Z,13Z,16Z))      | C45H78NO8P | 790.5373548 | No |
| 13170 | HMDB0009044; C00350 | PE(18:1(11Z)/22:5(7Z,10Z,13Z,16Z,19Z))     | C45H78NO8P | 790.5373548 | No |
| 13170 | HMDB0009076; C00350 | PE(18:1(9Z)/22:5(4Z,7Z,10Z,13Z,16Z))       | C45H78NO8P | 790.5373548 | No |
| 13170 | HMDB0009077; C00350 | PE(18:1(9Z)/22:5(7Z,10Z,13Z,16Z,19Z))      | C45H78NO8P | 790.5373548 | No |
| 13170 | HMDB0009108; C00350 | PE(18:2(9Z,12Z)/22:4(7Z,10Z,13Z,16Z))      | C45H78NO8P | 790.5373548 | No |
| 13170 | HMDB0009206; C00350 | PE(18:4(6Z,9Z,12Z,15Z)/22:2(13Z,16Z))      | C45H78NO8P | 790.5373548 | No |
| 13170 | HMDB0009269; C00350 | PE(20:1(11Z)/20:5(5Z,8Z,11Z,14Z,17Z))      | C45H78NO8P | 790.5373548 | No |
| 13170 | HMDB0009300; C00350 | PE(20:2(11Z,14Z)/20:4(5Z,8Z,11Z,14Z))      | C45H78NO8P | 790.5373548 | No |
| 13170 | HMDB0009301; C00350 | PE(20:2(11Z,14Z)/20:4(8Z,11Z,14Z,17Z))     | C45H78NO8P | 790.5373548 | No |
| 13170 | HMDB0009331; C00350 | PE(20:3(5Z,8Z,11Z)/20:3(5Z,8Z,11Z))        | C45H78NO8P | 790.5373548 | No |
| 13170 | HMDB0009332; C00350 | PE(20:3(5Z,8Z,11Z)/20:3(8Z,11Z,14Z))       | C45H78NO8P | 790.5373548 | No |
| 13170 | HMDB0009364; C00350 | PE(20:3(8Z,11Z,14Z)/20:3(5Z,8Z,11Z))       | C45H78NO8P | 790.5373548 | No |
| 13170 | HMDB0009365; C00350 | PE(20:3(8Z,11Z,14Z)/20:3(8Z,11Z,14Z))      | C45H78NO8P | 790.5373548 | No |
| 13170 | HMDB0009396; C00350 | PE(20:4(5Z,8Z,11Z,14Z)/20:2(11Z,14Z))      | C45H78NO8P | 790.5373548 | No |
| 13170 | HMDB0009429; C00350 | PE(20:4(8Z,11Z,14Z,17Z)/20:2(11Z,14Z))     | C45H78NO8P | 790.5373548 | No |
| 13170 | HMDB0009461; C00350 | PE(20:5(5Z,8Z,11Z,14Z,17Z)/20:1(11Z))      | C45H78NO8P | 790.5373548 | No |
| 13170 | HMDB0009558; C00350 | PE(22:2(13Z,16Z)/18:4(6Z,9Z,12Z,15Z))      | C45H78NO8P | 790.5373548 | No |
| 13170 | HMDB0009588; C00350 | PE(22:4(7Z,10Z,13Z,16Z)/18:2(9Z,12Z))      | C45H78NO8P | 790.5373548 | No |
| 13170 | HMDB0009619; C00350 | PE(22:5(4Z,7Z,10Z,13Z,16Z)/18:1(11Z))      | C45H78NO8P | 790.5373548 | No |
| 13170 | HMDB0009620; C00350 | PE(22:5(4Z,7Z,10Z,13Z,16Z)/18:1(9Z))       | C45H78NO8P | 790.5373548 | No |
| 13170 | HMDB0009652; C00350 | PE(22:5(7Z,10Z,13Z,16Z,19Z)/18:1(11Z))     | C45H78NO8P | 790.5373548 | No |
| 13170 | HMDB0009653; C00350 | PE(22:5(7Z,10Z,13Z,16Z,19Z)/18:1(9Z))      | C45H78NO8P | 790.5373548 | No |
| 13170 | HMDB0009684; C00350 | PE(22:6(4Z,7Z,10Z,13Z,16Z,19Z)/18:0)       | C45H78NO8P | 790.5373548 | No |
| 13170 | HMDB0113959         | PE-NMe2(16:0/22:6(4Z,7Z,10Z,13Z,16Z,19Z))  | C45H78NO8P | 790.5373548 | No |
| 13170 | HMDB0113980         | PE-NMe2(16:1(9Z)/22:5(4Z,7Z,10Z,13Z,16Z))  | C45H78NO8P | 790.5373548 | No |
| 13170 | HMDB0113981         | PE-NMe2(16:1(9Z)/22:5(7Z,10Z,13Z,16Z,19Z)) | C45H78NO8P | 790.5373548 | No |
| 13170 | HMDB0114028         | PE-NMe2(18:1(11Z)/20:5(5Z,8Z,11Z,14Z,17Z)) | C45H78NO8P | 790.5373548 | No |
| 13170 | HMDB0114055         | PE-NMe2(18:1(9Z)/20:5(5Z,8Z,11Z,14Z,17Z))  | C45H78NO8P | 790.5373548 | No |
| 13170 | HMDB0114082         | PE-NMe2(18:2(9Z,12Z)/20:4(5Z,8Z,11Z,14Z))  | C45H78NO8P | 790.5373548 | No |
| 13170 | HMDB0114083         | PE-NMe2(18:2(9Z,12Z)/20:4(8Z,11Z,14Z,17Z)) | C45H78NO8P | 790.5373548 | No |
| 13170 | HMDB0114109         | PE-NMe2(18:3(6Z,9Z,12Z)/20:3(5Z,8Z,11Z))   | C45H78NO8P | 790.5373548 | No |
| 13170 | HMDB0114110         | PE-NMe2(18:3(6Z,9Z,12Z)/20:3(8Z,11Z,14Z))  | C45H78NO8P | 790.5373548 | No |
| 13170 | HMDB0114138         | PE-NMe2(18:3(9Z,12Z,15Z)/20:3(5Z,8Z,11Z))  | C45H78NO8P | 790.5373548 | No |
| 13170 | HMDB0114139         | PE-NMe2(18:3(9Z,12Z,15Z)/20:3(8Z,11Z,14Z)) | C45H78NO8P | 790.5373548 | No |
| 13170 | HMDB0114166         | PE-NMe2(18:4(6Z,9Z,12Z,15Z)/20:2(11Z,14Z)) | C45H78NO8P | 790.5373548 | No |
| 13170 | HMDB0114250         | PE-NMe2(20:2(11Z,14Z)/18:4(6Z,9Z,12Z,15Z)) | C45H78NO8P | 790.5373548 | No |
| 13170 | HMDB0114277         | PE-NMe2(20:3(5Z,8Z,11Z)/18:3(6Z,9Z,12Z))   | C45H78NO8P | 790.5373548 | No |
| 13170 | HMDB0114278         | PE-NMe2(20:3(5Z,8Z,11Z)/18:3(9Z,12Z,15Z))  | C45H78NO8P | 790.5373548 | No |
| 13170 | HMDB0114305         | PE-NMe2(20:3(8Z,11Z,14Z)/18:3(6Z,9Z,12Z))  | C45H78NO8P | 790.5373548 | No |
| 13170 | HMDB0114306         | PE-NMe2(20:3(8Z,11Z,14Z)/18:3(9Z,12Z,15Z)) | C45H78NO8P | 790.5373548 | No |
| 13170 | HMDB0114332         | PE-NMe2(20:4(5Z,8Z,11Z,14Z)/18:2(9Z,12Z))  | C45H78NO8P | 790.5373548 | No |
| 13170 | HMDB0114360         | PE-NMe2(20:4(8Z,11Z,14Z,17Z)/18:2(9Z,12Z)) | C45H78NO8P | 790.5373548 | No |
| 13170 | HMDB0114387         | PE-NMe2(20:5(5Z,8Z,11Z,14Z,17Z)/18:1(11Z)) | C45H78NO8P | 790.5373548 | No |
| 13170 | HMDB0114388         | PE-NMe2(20:5(5Z,8Z,11Z,14Z,17Z)/18:1(9Z))  | C45H78NO8P | 790.5373548 | No |
| 13170 | HMDB0114526         | PE-NMe2(22:5(4Z,7Z,10Z,13Z,16Z)/16:1(9Z))  | C45H78NO8P | 790.5373548 | No |
| 13170 | HMDB0114553         | PE-NMe2(22:5(7Z,10Z,13Z,16Z,19Z)/16:1(9Z)) | C45H78NO8P | 790.5373548 | No |
| 13170 | HMDB0114579         | PE-NMe2(22:6(4Z,7Z,10Z,13Z,16Z,19Z)/16:0)  | C45H78NO8P | 790.5373548 | No |
| 13204 | HMDB0007955; C00157 | PC(15:0/22:4(7Z,10Z,13Z,16Z))              | C45H82NO8P | 794.5677637 | No |
| 13204 | HMDB0008625; C00157 | PC(22:4(7Z,10Z,13Z,16Z)/15:0)              | C45H82NO8P | 794.5677637 | No |
| 13204 | HMDB0009009; C00350 | PE(18:0/22:4(7Z,10Z,13Z,16Z))              | C45H82NO8P | 794.5677637 | No |
| 13204 | HMDB0009107; C00350 | PE(18:2(9Z,12Z)/22:2(13Z,16Z))             | C45H82NO8P | 794.5677637 | No |
| 13204 | HMDB0009139; C00350 | PE(18:3(6Z,9Z,12Z)/22:1(13Z))              | C45H82NO8P | 794.5677637 | No |
| 13204 | HMDB0009172; C00350 | PE(18:3(9Z,12Z,15Z)/22:1(13Z))             | C45H82NO8P | 794.5677637 | No |

|       |                     |                                                      |             |             |    |
|-------|---------------------|------------------------------------------------------|-------------|-------------|----|
| 13204 | HMDB0009204; C00350 | PE(18:4(6Z,9Z,12Z,15Z)/22:0)                         | C45H82NO8P  | 794.5677637 | No |
| 13204 | HMDB0009234; C00350 | PE(20:0/20:4(5Z,8Z,11Z,14Z))                         | C45H82NO8P  | 794.5677637 | No |
| 13204 | HMDB0009235; C00350 | PE(20:0/20:4(8Z,11Z,14Z,17Z))                        | C45H82NO8P  | 794.5677637 | No |
| 13204 | HMDB0009265; C00350 | PE(20:1(11Z)/20:3(5Z,8Z,11Z))                        | C45H82NO8P  | 794.5677637 | No |
| 13204 | HMDB0009266; C00350 | PE(20:1(11Z)/20:3(8Z,11Z,14Z))                       | C45H82NO8P  | 794.5677637 | No |
| 13204 | HMDB0009297; C00350 | PE(20:2(11Z,14Z)/20:2(11Z,14Z))                      | C45H82NO8P  | 794.5677637 | No |
| 13204 | HMDB0009329; C00350 | PE(20:3(5Z,8Z,11Z)/20:1(11Z))                        | C45H82NO8P  | 794.5677637 | No |
| 13204 | HMDB0009362; C00350 | PE(20:3(8Z,11Z,14Z)/20:1(11Z))                       | C45H82NO8P  | 794.5677637 | No |
| 13204 | HMDB0009394; C00350 | PE(20:4(5Z,8Z,11Z,14Z)/20:0)                         | C45H82NO8P  | 794.5677637 | No |
| 13204 | HMDB0009427; C00350 | PE(20:4(8Z,11Z,14Z,17Z)/20:0)                        | C45H82NO8P  | 794.5677637 | No |
| 13204 | HMDB0009492; C00350 | PE(22:0/18:4(6Z,9Z,12Z,15Z))                         | C45H82NO8P  | 794.5677637 | No |
| 13204 | HMDB0009523; C00350 | PE(22:1(13Z)/18:3(6Z,9Z,12Z))                        | C45H82NO8P  | 794.5677637 | No |
| 13204 | HMDB0009524; C00350 | PE(22:1(13Z)/18:3(9Z,12Z,15Z))                       | C45H82NO8P  | 794.5677637 | No |
| 13204 | HMDB0009555; C00350 | PE(22:2(13Z,16Z)/18:2(9Z,12Z))                       | C45H82NO8P  | 794.5677637 | No |
| 13204 | HMDB0009585; C00350 | PE(22:4(7Z,10Z,13Z,16Z)/18:0)                        | C45H82NO8P  | 794.5677637 | No |
| 13204 | HMDB0113956         | PE-NMe2(16:0/22:4(7Z,10Z,13Z,16Z))                   | C45H82NO8P  | 794.5677637 | No |
| 13204 | HMDB0113999         | PE-NMe2(18:0/20:4(5Z,8Z,11Z,14Z))                    | C45H82NO8P  | 794.5677637 | No |
| 13204 | HMDB0114000         | PE-NMe2(18:0/20:4(8Z,11Z,14Z,17Z))                   | C45H82NO8P  | 794.5677637 | No |
| 13204 | HMDB0114024         | PE-NMe2(18:1(11Z)/20:3(5Z,8Z,11Z))                   | C45H82NO8P  | 794.5677637 | No |
| 13204 | HMDB0114025         | PE-NMe2(18:1(11Z)/20:3(8Z,11Z,14Z))                  | C45H82NO8P  | 794.5677637 | No |
| 13204 | HMDB0114051         | PE-NMe2(18:1(9Z)/20:3(5Z,8Z,11Z))                    | C45H82NO8P  | 794.5677637 | No |
| 13204 | HMDB0114052         | PE-NMe2(18:1(9Z)/20:3(8Z,11Z,14Z))                   | C45H82NO8P  | 794.5677637 | No |
| 13204 | HMDB0114079         | PE-NMe2(18:2(9Z,12Z)/20:2(11Z,14Z))                  | C45H82NO8P  | 794.5677637 | No |
| 13204 | HMDB0114107         | PE-NMe2(18:3(6Z,9Z,12Z)/20:1(11Z))                   | C45H82NO8P  | 794.5677637 | No |
| 13204 | HMDB0114136         | PE-NMe2(18:3(9Z,12Z,15Z)/20:1(11Z))                  | C45H82NO8P  | 794.5677637 | No |
| 13204 | HMDB0114164         | PE-NMe2(18:4(6Z,9Z,12Z,15Z)/20:0)                    | C45H82NO8P  | 794.5677637 | No |
| 13204 | HMDB0114192         | PE-NMe2(20:0/18:4(6Z,9Z,12Z,15Z))                    | C45H82NO8P  | 794.5677637 | No |
| 13204 | HMDB0114219         | PE-NMe2(20:1(11Z)/18:3(6Z,9Z,12Z))                   | C45H82NO8P  | 794.5677637 | No |
| 13204 | HMDB0114220         | PE-NMe2(20:1(11Z)/18:3(9Z,12Z,15Z))                  | C45H82NO8P  | 794.5677637 | No |
| 13204 | HMDB0114247         | PE-NMe2(20:2(11Z,14Z)/18:2(9Z,12Z))                  | C45H82NO8P  | 794.5677637 | No |
| 13204 | HMDB0114274         | PE-NMe2(20:3(5Z,8Z,11Z)/18:1(11Z))                   | C45H82NO8P  | 794.5677637 | No |
| 13204 | HMDB0114275         | PE-NMe2(20:3(5Z,8Z,11Z)/18:1(9Z))                    | C45H82NO8P  | 794.5677637 | No |
| 13204 | HMDB0114302         | PE-NMe2(20:3(8Z,11Z,14Z)/18:1(11Z))                  | C45H82NO8P  | 794.5677637 | No |
| 13204 | HMDB0114303         | PE-NMe2(20:3(8Z,11Z,14Z)/18:1(9Z))                   | C45H82NO8P  | 794.5677637 | No |
| 13204 | HMDB0114329         | PE-NMe2(20:4(5Z,8Z,11Z,14Z)/18:0)                    | C45H82NO8P  | 794.5677637 | No |
| 13204 | HMDB0114357         | PE-NMe2(20:4(8Z,11Z,14Z,17Z)/18:0)                   | C45H82NO8P  | 794.5677637 | No |
| 13204 | HMDB0114498         | PE-NMe2(22:4(7Z,10Z,13Z,16Z)/16:0)                   | C45H82NO8P  | 794.5677637 | No |
| 13218 | HMDB0030465         | Mocimycin                                            | C43H60N2O12 | 795.4068645 | No |
| 13219 | HMDB0010582         | PG(16:0/22:5(4Z,7Z,10Z,13Z,16Z))                     | C44H77O10P  | 795.5156612 | No |
| 13219 | HMDB0010583         | PG(16:0/22:5(7Z,10Z,13Z,16Z,19Z))                    | C44H77O10P  | 795.5156612 | No |
| 13219 | HMDB0010596         | PG(16:1(9Z)/22:4(7Z,10Z,13Z,16Z))                    | C44H77O10P  | 795.5156612 | No |
| 13219 | HMDB0010625         | PG(18:1(11Z)/20:4(5Z,8Z,11Z,14Z))                    | C44H77O10P  | 795.5156612 | No |
| 13219 | HMDB0010640         | PG(18:1(9Z)/20:4(5Z,8Z,11Z,14Z))                     | C44H77O10P  | 795.5156612 | No |
| 13219 | HMDB0010653         | PG(18:2(9Z,12Z)/20:3(5Z,8Z,11Z))                     | C44H77O10P  | 795.5156612 | No |
| 13219 | HMDB0010654         | PG(18:2(9Z,12Z)/20:3(8Z,11Z,14Z))                    | C44H77O10P  | 795.5156612 | No |
| 13219 | HMDB0116578         | PG(20:3(5Z,8Z,11Z)/18:2(9Z,12Z))                     | C44H77O10P  | 795.5156612 | No |
| 13219 | HMDB0116581         | PG(20:3(8Z,11Z,14Z)/18:2(9Z,12Z))                    | C44H77O10P  | 795.5156612 | No |
| 13219 | HMDB0116609         | PG(20:4(5Z,8Z,11Z,14Z)/18:1(11Z))                    | C44H77O10P  | 795.5156612 | No |
| 13219 | HMDB0116610         | PG(20:4(5Z,8Z,11Z,14Z)/18:1(9Z))                     | C44H77O10P  | 795.5156612 | No |
| 13219 | HMDB0116621         | PG(22:5(7Z,10Z,13Z,16Z,19Z)/16:0)                    | C44H77O10P  | 795.5156612 | No |
| 13219 | HMDB0116743         | PG(22:5(4Z,7Z,10Z,13Z,16Z)/16:0)                     | C44H77O10P  | 795.5156612 | No |
| 13237 | HMDB0115344         | PA(22:4(7Z,10Z,13Z,16Z)/22:5(4Z,7Z,10Z,13Z,16Z))     | C47H75O8P   | 797.5130446 | No |
| 13237 | HMDB0115345         | PA(22:4(7Z,10Z,13Z,16Z)/22:5(7Z,10Z,13Z,16Z,19Z))    | C47H75O8P   | 797.5130446 | No |
| 13237 | HMDB0115370         | PA(22:5(4Z,7Z,10Z,13Z,16Z)/22:4(7Z,10Z,13Z,16Z))     | C47H75O8P   | 797.5130446 | No |
| 13237 | HMDB0115395         | PA(22:5(7Z,10Z,13Z,16Z,19Z)/22:4(7Z,10Z,13Z,16Z))    | C47H75O8P   | 797.5130446 | No |
| 13249 | HMDB0008248; C00157 | PC(18:4(6Z,9Z,12Z,15Z)/20:5(5Z,8Z,11Z,14Z,17Z))      | C46H74NO8P  | 798.5096334 | No |
| 13249 | HMDB0008503; C00157 | PC(20:5(5Z,8Z,11Z,14Z,17Z)/18:4(6Z,9Z,12Z,15Z))      | C46H74NO8P  | 798.5096334 | No |
| 13249 | HMDB0113218         | PE-NMe(18:3(6Z,9Z,12Z)/22:6(4Z,7Z,10Z,13Z,16Z,19Z))  | C46H74NO8P  | 798.5096334 | No |
| 13249 | HMDB0113247         | PE-NMe(18:3(9Z,12Z,15Z)/22:6(4Z,7Z,10Z,13Z,16Z,19Z)) | C46H74NO8P  | 798.5096334 | No |
| 13249 | HMDB0113274         | PE-NMe(18:4(6Z,9Z,12Z,15Z)/22:5(4Z,7Z,10Z,13Z,16Z))  | C46H74NO8P  | 798.5096334 | No |
| 13249 | HMDB0113275         | PE-NMe(18:4(6Z,9Z,12Z,15Z)/22:5(7Z,10Z,13Z,16Z,19Z)) | C46H74NO8P  | 798.5096334 | No |

|       |                     |                                                      |             |             |    |
|-------|---------------------|------------------------------------------------------|-------------|-------------|----|
| 13249 | HMDB0113440         | PE-NMe(20:4(5Z,8Z,11Z,14Z)/20:5(5Z,8Z,11Z,14Z,17Z))  | C46H74NO8P  | 798.5096334 | No |
| 13249 | HMDB0113469         | PE-NMe(20:4(8Z,11Z,14Z,17Z)/20:5(5Z,8Z,11Z,14Z,17Z)) | C46H74NO8P  | 798.5096334 | No |
| 13249 | HMDB0113496         | PE-NMe(20:5(5Z,8Z,11Z,14Z,17Z)/20:4(5Z,8Z,11Z,14Z))  | C46H74NO8P  | 798.5096334 | No |
| 13249 | HMDB0113497         | PE-NMe(20:5(5Z,8Z,11Z,14Z,17Z)/20:4(8Z,11Z,14Z,17Z)) | C46H74NO8P  | 798.5096334 | No |
| 13249 | HMDB0113630         | PE-NMe(22:5(4Z,7Z,10Z,13Z,16Z)/18:4(6Z,9Z,12Z,15Z))  | C46H74NO8P  | 798.5096334 | No |
| 13249 | HMDB0113657         | PE-NMe(22:5(7Z,10Z,13Z,16Z,19Z)/18:4(6Z,9Z,12Z,15Z)) | C46H74NO8P  | 798.5096334 | No |
| 13249 | HMDB0113682         | PE-NMe(22:6(4Z,7Z,10Z,13Z,16Z,19Z)/18:3(6Z,9Z,12Z))  | C46H74NO8P  | 798.5096334 | No |
| 13249 | HMDB0113683         | PE-NMe(22:6(4Z,7Z,10Z,13Z,16Z,19Z)/18:3(9Z,12Z,15Z)) | C46H74NO8P  | 798.5096334 | No |
| 13265 | HMDB0115320         | PA(22:2(13Z,16Z)/22:6(4Z,7Z,10Z,13Z,16Z,19Z))        | C47H77O8P   | 799.5287507 | No |
| 13265 | HMDB0115343         | PA(22:4(7Z,10Z,13Z,16Z)/22:4(7Z,10Z,13Z,16Z))        | C47H77O8P   | 799.5287507 | No |
| 13265 | HMDB0115421         | PA(22:6(4Z,7Z,10Z,13Z,16Z,19Z)/22:2(13Z,16Z))        | C47H77O8P   | 799.5287507 | No |
| 13278 | HMDB0008182; C00157 | PC(18:3(6Z,9Z,12Z)/20:5(5Z,8Z,11Z,14Z,17Z))          | C46H76NO8P  | 800.5221798 | No |
| 13278 | HMDB0008215; C00157 | PC(18:3(9Z,12Z,15Z)/20:5(5Z,8Z,11Z,14Z,17Z))         | C46H76NO8P  | 800.5221798 | No |
| 13278 | HMDB0008246; C00157 | PC(18:4(6Z,9Z,12Z,15Z)/20:4(5Z,8Z,11Z,14Z))          | C46H76NO8P  | 800.5221798 | No |
| 13278 | HMDB0008247; C00157 | PC(18:4(6Z,9Z,12Z,15Z)/20:4(8Z,11Z,14Z,17Z))         | C46H76NO8P  | 800.5221798 | No |
| 13278 | HMDB0008437; C00157 | PC(20:4(5Z,8Z,11Z,14Z)/18:4(6Z,9Z,12Z,15Z))          | C46H76NO8P  | 800.5221798 | No |
| 13278 | HMDB0008470; C00157 | PC(20:4(8Z,11Z,14Z,17Z)/18:4(6Z,9Z,12Z,15Z))         | C46H76NO8P  | 800.5221798 | No |
| 13278 | HMDB0008501; C00157 | PC(20:5(5Z,8Z,11Z,14Z,17Z)/18:3(6Z,9Z,12Z))          | C46H76NO8P  | 800.5221798 | No |
| 13278 | HMDB0008502; C00157 | PC(20:5(5Z,8Z,11Z,14Z,17Z)/18:3(9Z,12Z,15Z))         | C46H76NO8P  | 800.5221798 | No |
| 13278 | HMDB0112976         | PE-NMe(20:4(5Z,8Z,11Z,14Z)/20:4(5Z,8Z,11Z,14Z))      | C46H76NO8P  | 800.5221798 | No |
| 13278 | HMDB0113190         | PE-NMe(18:2(9Z,12Z)/22:6(4Z,7Z,10Z,13Z,16Z,19Z))     | C46H76NO8P  | 800.5221798 | No |
| 13278 | HMDB0113216         | PE-NMe(18:3(6Z,9Z,12Z)/22:5(4Z,7Z,10Z,13Z,16Z))      | C46H76NO8P  | 800.5221798 | No |
| 13278 | HMDB0113217         | PE-NMe(18:3(6Z,9Z,12Z)/22:5(7Z,10Z,13Z,16Z,19Z))     | C46H76NO8P  | 800.5221798 | No |
| 13278 | HMDB0113245         | PE-NMe(18:3(9Z,12Z,15Z)/22:5(4Z,7Z,10Z,13Z,16Z))     | C46H76NO8P  | 800.5221798 | No |
| 13278 | HMDB0113246         | PE-NMe(18:3(9Z,12Z,15Z)/22:5(7Z,10Z,13Z,16Z,19Z))    | C46H76NO8P  | 800.5221798 | No |
| 13278 | HMDB0113273         | PE-NMe(18:4(6Z,9Z,12Z,15Z)/22:4(7Z,10Z,13Z,16Z))     | C46H76NO8P  | 800.5221798 | No |
| 13278 | HMDB0113385         | PE-NMe(20:3(5Z,8Z,11Z)/20:5(5Z,8Z,11Z,14Z,17Z))      | C46H76NO8P  | 800.5221798 | No |
| 13278 | HMDB0113413         | PE-NMe(20:3(8Z,11Z,14Z)/20:5(5Z,8Z,11Z,14Z,17Z))     | C46H76NO8P  | 800.5221798 | No |
| 13278 | HMDB0113439         | PE-NMe(20:4(5Z,8Z,11Z,14Z)/20:4(8Z,11Z,14Z,17Z))     | C46H76NO8P  | 800.5221798 | No |
| 13278 | HMDB0113467         | PE-NMe(20:4(8Z,11Z,14Z,17Z)/20:4(5Z,8Z,11Z,14Z))     | C46H76NO8P  | 800.5221798 | No |
| 13278 | HMDB0113468         | PE-NMe(20:4(8Z,11Z,14Z,17Z)/20:4(8Z,11Z,14Z,17Z))    | C46H76NO8P  | 800.5221798 | No |
| 13278 | HMDB0113494         | PE-NMe(20:5(5Z,8Z,11Z,14Z,17Z)/20:3(5Z,8Z,11Z))      | C46H76NO8P  | 800.5221798 | No |
| 13278 | HMDB0113495         | PE-NMe(20:5(5Z,8Z,11Z,14Z,17Z)/20:3(8Z,11Z,14Z))     | C46H76NO8P  | 800.5221798 | No |
| 13278 | HMDB0113603         | PE-NMe(22:4(7Z,10Z,13Z,16Z)/18:4(6Z,9Z,12Z,15Z))     | C46H76NO8P  | 800.5221798 | No |
| 13278 | HMDB0113628         | PE-NMe(22:5(4Z,7Z,10Z,13Z,16Z)/18:3(6Z,9Z,12Z))      | C46H76NO8P  | 800.5221798 | No |
| 13278 | HMDB0113629         | PE-NMe(22:5(4Z,7Z,10Z,13Z,16Z)/18:3(9Z,12Z,15Z))     | C46H76NO8P  | 800.5221798 | No |
| 13278 | HMDB0113655         | PE-NMe(22:5(7Z,10Z,13Z,16Z,19Z)/18:3(6Z,9Z,12Z))     | C46H76NO8P  | 800.5221798 | No |
| 13278 | HMDB0113656         | PE-NMe(22:5(7Z,10Z,13Z,16Z,19Z)/18:3(9Z,12Z,15Z))    | C46H76NO8P  | 800.5221798 | No |
| 13278 | HMDB0113681         | PE-NMe(22:6(4Z,7Z,10Z,13Z,16Z,19Z)/18:2(9Z,12Z))     | C46H76NO8P  | 800.5221798 | No |
| 13279 | HMDB0112763         | PS(22:2(13Z,16Z)/15:0)                               | C43H80NO10P | 800.5429396 | No |
| 13279 | HMDB0116749         | PS(15:0/22:2(13Z,16Z))                               | C43H80NO10P | 800.5429396 | No |
| 13280 | HMDB0008292; C00157 | PC(20:0/P-18:0)                                      | C46H92NO7P  | 800.6512378 | No |
| 13280 | HMDB0008554; C00157 | PC(22:0/P-16:0)                                      | C46H92NO7P  | 800.6512378 | No |
| 13280 | HMDB0011223         | PC(P-16:0/22:0)                                      | C46H92NO7P  | 800.6512378 | No |
| 13280 | HMDB0011248         | PC(P-18:0/20:0)                                      | C46H92NO7P  | 800.6512378 | No |
| 13280 | HMDB0013416         | PC(o-16:1(9Z)/22:0)                                  | C46H92NO7P  | 800.6512378 | No |
| 13280 | HMDB0013430         | PC(o-18:1(9Z)/20:0)                                  | C46H92NO7P  | 800.6512378 | No |
| 13287 | HMDB0013472         | PGP(16:0/16:0)                                       | C38H76O13P2 | 801.4670897 | No |
| 13287 | HMDB0116525         | PGP(a-13:0/i-19:0)                                   | C38H76O13P2 | 801.4670897 | No |
| 13287 | HMDB0116544         | PGP(i-12:0/i-20:0)                                   | C38H76O13P2 | 801.4670897 | No |
| 13287 | HMDB0116561         | PGP(i-13:0/i-19:0)                                   | C38H76O13P2 | 801.4670897 | No |
| 13289 | HMDB0115293         | PA(22:1(13Z)/22:6(4Z,7Z,10Z,13Z,16Z,19Z))            | C47H79O8P   | 801.5465154 | No |
| 13289 | HMDB0115318         | PA(22:2(13Z,16Z)/22:5(4Z,7Z,10Z,13Z,16Z))            | C47H79O8P   | 801.5465154 | No |
| 13289 | HMDB0115319         | PA(22:2(13Z,16Z)/22:5(7Z,10Z,13Z,16Z,19Z))           | C47H79O8P   | 801.5465154 | No |
| 13289 | HMDB0115369         | PA(22:5(4Z,7Z,10Z,13Z,16Z)/22:2(13Z,16Z))            | C47H79O8P   | 801.5465154 | No |
| 13289 | HMDB0115394         | PA(22:5(7Z,10Z,13Z,16Z,19Z)/22:2(13Z,16Z))           | C47H79O8P   | 801.5465154 | No |
| 13289 | HMDB0115420         | PA(22:6(4Z,7Z,10Z,13Z,16Z,19Z)/22:1(13Z))            | C47H79O8P   | 801.5465154 | No |
| 13307 | HMDB0008023; C00157 | PC(16:1(9Z)/22:6(4Z,7Z,10Z,13Z,16Z,19Z))             | C46H78NO8P  | 802.537657  | No |
| 13307 | HMDB0008149; C00157 | PC(18:2(9Z,12Z)/20:5(5Z,8Z,11Z,14Z,17Z))             | C46H78NO8P  | 802.537657  | No |
| 13307 | HMDB0008180; C00157 | PC(18:3(6Z,9Z,12Z)/20:4(5Z,8Z,11Z,14Z))              | C46H78NO8P  | 802.537657  | No |
| 13307 | HMDB0008181; C00157 | PC(18:3(6Z,9Z,12Z)/20:4(8Z,11Z,14Z,17Z))             | C46H78NO8P  | 802.537657  | No |

|       |                                   |                                               |             |             |    |
|-------|-----------------------------------|-----------------------------------------------|-------------|-------------|----|
| 13307 | HMDB0008213; C00157               | PC(18:3(9Z,12Z,15Z)/20:4(5Z,8Z,11Z,14Z))      | C46H78NO8P  | 802.537657  | No |
| 13307 | HMDB0008214; C00157               | PC(18:3(9Z,12Z,15Z)/20:4(8Z,11Z,14Z,17Z))     | C46H78NO8P  | 802.537657  | No |
| 13307 | HMDB0008244; C00157               | PC(18:4(6Z,9Z,12Z,15Z)/20:3(5Z,8Z,11Z))       | C46H78NO8P  | 802.537657  | No |
| 13307 | HMDB0008245; C00157               | PC(18:4(6Z,9Z,12Z,15Z)/20:3(8Z,11Z,14Z))      | C46H78NO8P  | 802.537657  | No |
| 13307 | HMDB0008372; C00157               | PC(20:3(5Z,8Z,11Z)/18:4(6Z,9Z,12Z,15Z))       | C46H78NO8P  | 802.537657  | No |
| 13307 | HMDB0008405; C00157               | PC(20:3(8Z,11Z,14Z)/18:4(6Z,9Z,12Z,15Z))      | C46H78NO8P  | 802.537657  | No |
| 13307 | HMDB0008435; C00157               | PC(20:4(5Z,8Z,11Z,14Z)/18:3(6Z,9Z,12Z))       | C46H78NO8P  | 802.537657  | No |
| 13307 | HMDB0008436; C00157               | PC(20:4(5Z,8Z,11Z,14Z)/18:3(9Z,12Z,15Z))      | C46H78NO8P  | 802.537657  | No |
| 13307 | HMDB0008468; C00157               | PC(20:4(8Z,11Z,14Z,17Z)/18:3(6Z,9Z,12Z))      | C46H78NO8P  | 802.537657  | No |
| 13307 | HMDB0008469; C00157               | PC(20:4(8Z,11Z,14Z,17Z)/18:3(9Z,12Z,15Z))     | C46H78NO8P  | 802.537657  | No |
| 13307 | HMDB0008500; C00157               | PC(20:5(5Z,8Z,11Z,14Z,17Z)/18:2(9Z,12Z))      | C46H78NO8P  | 802.537657  | No |
| 13307 | HMDB0008726; C00157               | PC(22:6(4Z,7Z,10Z,13Z,16Z,19Z)/16:1(9Z))      | C46H78NO8P  | 802.537657  | No |
| 13307 | HMDB0113134                       | PE-NMe(18:1(11Z)/22:6(4Z,7Z,10Z,13Z,16Z,19Z)) | C46H78NO8P  | 802.537657  | No |
| 13307 | HMDB0113161                       | PE-NMe(18:1(9Z)/22:6(4Z,7Z,10Z,13Z,16Z,19Z))  | C46H78NO8P  | 802.537657  | No |
| 13307 | HMDB0113188                       | PE-NMe(18:2(9Z,12Z)/22:5(4Z,7Z,10Z,13Z,16Z))  | C46H78NO8P  | 802.537657  | No |
| 13307 | HMDB0113189                       | PE-NMe(18:2(9Z,12Z)/22:5(7Z,10Z,13Z,16Z,19Z)) | C46H78NO8P  | 802.537657  | No |
| 13307 | HMDB0113215                       | PE-NMe(18:3(6Z,9Z,12Z)/22:4(7Z,10Z,13Z,16Z))  | C46H78NO8P  | 802.537657  | No |
| 13307 | HMDB0113244                       | PE-NMe(18:3(9Z,12Z,15Z)/22:4(7Z,10Z,13Z,16Z)) | C46H78NO8P  | 802.537657  | No |
| 13307 | HMDB0113356                       | PE-NMe(20:2(11Z,14Z)/20:5(5Z,8Z,11Z,14Z,17Z)) | C46H78NO8P  | 802.537657  | No |
| 13307 | HMDB0113383                       | PE-NMe(20:3(5Z,8Z,11Z)/20:4(5Z,8Z,11Z,14Z))   | C46H78NO8P  | 802.537657  | No |
| 13307 | HMDB0113384                       | PE-NMe(20:3(5Z,8Z,11Z)/20:4(8Z,11Z,14Z,17Z))  | C46H78NO8P  | 802.537657  | No |
| 13307 | HMDB0113411                       | PE-NMe(20:3(8Z,11Z,14Z)/20:4(5Z,8Z,11Z,14Z))  | C46H78NO8P  | 802.537657  | No |
| 13307 | HMDB0113412                       | PE-NMe(20:3(8Z,11Z,14Z)/20:4(8Z,11Z,14Z,17Z)) | C46H78NO8P  | 802.537657  | No |
| 13307 | HMDB0113437                       | PE-NMe(20:4(5Z,8Z,11Z,14Z)/20:3(5Z,8Z,11Z))   | C46H78NO8P  | 802.537657  | No |
| 13307 | HMDB0113438                       | PE-NMe(20:4(5Z,8Z,11Z,14Z)/20:3(8Z,11Z,14Z))  | C46H78NO8P  | 802.537657  | No |
| 13307 | HMDB0113465                       | PE-NMe(20:4(8Z,11Z,14Z,17Z)/20:3(5Z,8Z,11Z))  | C46H78NO8P  | 802.537657  | No |
| 13307 | HMDB0113466                       | PE-NMe(20:4(8Z,11Z,14Z,17Z)/20:3(8Z,11Z,14Z)) | C46H78NO8P  | 802.537657  | No |
| 13307 | HMDB0113493                       | PE-NMe(20:5(5Z,8Z,11Z,14Z,17Z)/20:2(11Z,14Z)) | C46H78NO8P  | 802.537657  | No |
| 13307 | HMDB0113601                       | PE-NMe(22:4(7Z,10Z,13Z,16Z)/18:3(6Z,9Z,12Z))  | C46H78NO8P  | 802.537657  | No |
| 13307 | HMDB0113602                       | PE-NMe(22:4(7Z,10Z,13Z,16Z)/18:3(9Z,12Z,15Z)) | C46H78NO8P  | 802.537657  | No |
| 13307 | HMDB0113627                       | PE-NMe(22:5(4Z,7Z,10Z,13Z,16Z)/18:2(9Z,12Z))  | C46H78NO8P  | 802.537657  | No |
| 13307 | HMDB0113654                       | PE-NMe(22:5(7Z,10Z,13Z,16Z,19Z)/18:2(9Z,12Z)) | C46H78NO8P  | 802.537657  | No |
| 13307 | HMDB0113679                       | PE-NMe(22:6(4Z,7Z,10Z,13Z,16Z,19Z)/18:1(11Z)) | C46H78NO8P  | 802.537657  | No |
| 13307 | HMDB0113680                       | PE-NMe(22:6(4Z,7Z,10Z,13Z,16Z,19Z)/18:1(9Z))  | C46H78NO8P  | 802.537657  | No |
| 13314 | HMDB0060250; CHEBI:50774          | 2-Decaprenyl-6-methoxyphenol                  | C57H88O2    | 803.6729597 | No |
| 13323 | HMDB0014652; CHEBI:53773          | Acetyldigitoxin                               | C43H66O14   | 805.439976  | No |
| 13324 | HMDB0009780; C00626               | PI(16:0/16:2(9Z,12Z))                         | C41H75O13P  | 805.4875877 | No |
| 13324 | HMDB0009798; C00626               | PI(16:1(9Z)/16:1(9Z))                         | C41H75O13P  | 805.4875877 | No |
| 13324 | HMDB0009802; C00626               | PI(16:2(9Z,12Z)/16:0)                         | C41H75O13P  | 805.4875877 | No |
| 13339 | HMDB0012314; C06125               | 3-O-Sulfogalactosylceramide (d18:1/18:0)      | C42H81NO11S | 806.544053  | No |
| 13362 | HMDB0009778; C00626               | PI(16:0/16:0)                                 | C41H79O13P  | 809.5182862 | No |
| 13369 | HMDB0015111; C12009               | Telithromycin                                 | C43H65N5O10 | 810.4657762 | No |
| 13384 | HMDB0015448; C12753; CHEBI:659106 | Troleandomycin                                | C41H67NO15  | 812.4454239 | No |
| 13415 | HMDB0010659                       | PG(18:2(9Z,12Z)/22:6(4Z,7Z,10Z,13Z,16Z,19Z))  | C46H75O10P  | 817.5026952 | No |
| 13415 | HMDB0010672                       | PG(18:3(6Z,9Z,12Z)/22:5(4Z,7Z,10Z,13Z,16Z))   | C46H75O10P  | 817.5026952 | No |
| 13415 | HMDB0010673                       | PG(18:3(6Z,9Z,12Z)/22:5(7Z,10Z,13Z,16Z,19Z))  | C46H75O10P  | 817.5026952 | No |
| 13415 | HMDB0010687                       | PG(18:3(9Z,12Z,15Z)/22:5(4Z,7Z,10Z,13Z,16Z))  | C46H75O10P  | 817.5026952 | No |
| 13415 | HMDB0010688                       | PG(18:3(9Z,12Z,15Z)/22:5(7Z,10Z,13Z,16Z,19Z)) | C46H75O10P  | 817.5026952 | No |
| 13415 | HMDB0116589                       | PG(20:4(5Z,8Z,11Z,14Z)/20:4(5Z,8Z,11Z,14Z))   | C46H75O10P  | 817.5026952 | No |
| 13415 | HMDB0116590                       | PG(20:4(5Z,8Z,11Z,14Z)/20:4(8Z,11Z,14Z,17Z))  | C46H75O10P  | 817.5026952 | No |
| 13415 | HMDB0116596                       | PG(20:4(8Z,11Z,14Z,17Z)/20:4(5Z,8Z,11Z,14Z))  | C46H75O10P  | 817.5026952 | No |
| 13415 | HMDB0116597                       | PG(20:4(8Z,11Z,14Z,17Z)/20:4(8Z,11Z,14Z,17Z)) | C46H75O10P  | 817.5026952 | No |
| 13415 | HMDB0116600                       | PG(22:6(4Z,7Z,10Z,13Z,16Z,19Z)/18:2(9Z,12Z))  | C46H75O10P  | 817.5026952 | No |
| 13448 | HMDB0015179; C06688; CHEBI:28077  | Rifampin                                      | C43H58N4O12 | 821.397014  | No |
| 13448 | HMDB0029843; C02284; CHEBI:15939  | Glycyrrhizin                                  | C42H62O16   | 821.397014  | No |
| 13448 | HMDB0034522                       | Periandrin I                                  | C42H62O16   | 821.397014  | No |
| 13448 | HMDB0039250                       | Licoricesaponin K2                            | C42H62O16   | 821.397014  | No |
| 13448 | HMDB0039310                       | Uralsaponin B                                 | C42H62O16   | 821.397014  | No |
| 13449 | HMDB0013493                       | PGP(16:1(9Z)/18:3(6Z,9Z,12Z))                 | C40H72O13P2 | 821.4357681 | No |
| 13449 | HMDB0013563                       | PGP(18:3(6Z,9Z,12Z)/16:1(9Z))                 | C40H72O13P2 | 821.4357681 | No |
| 13449 | HMDB0013578                       | PGP(18:3(9Z,12Z,15Z)/16:1(9Z))                | C40H72O13P2 | 821.4357681 | No |

|       |                                  |                                                     |                |             |    |
|-------|----------------------------------|-----------------------------------------------------|----------------|-------------|----|
| 13492 | HMDB0010611                      | PG(18:0/22:4(7Z,10Z,13Z,16Z))                       | C46H83O10P     | 825.564008  | No |
| 13503 | HMDB0035449                      | 1beta,2alpha,3beta,19alpha-Tetrahydroxy-12-ursen-2  | C42H68O16      | 827.4444187 | No |
| 13503 | HMDB0040123                      | Centellasaponin B                                   | C42H68O16      | 827.4444187 | No |
| 13577 | HMDB0009782; C00626              | PI(16:0/18:1(11Z))                                  | C43H81O13P     | 835.5317352 | No |
| 13577 | HMDB0009783; C00626              | PI(16:0/18:1(9Z))                                   | C43H81O13P     | 835.5317352 | No |
| 13577 | HMDB0009799; C00626              | PI(16:1(9Z)/18:0)                                   | C43H81O13P     | 835.5317352 | No |
| 13577 | HMDB0009806; C00626              | PI(18:0/16:1(9Z))                                   | C43H81O13P     | 835.5317352 | No |
| 13577 | HMDB0009822; C00626              | PI(18:1(11Z)/16:0)                                  | C43H81O13P     | 835.5317352 | No |
| 13577 | HMDB0009834; C00626              | PI(18:1(9Z)/16:0)                                   | C43H81O13P     | 835.5317352 | No |
| 13586 | HMDB0006805; C02335; CHEBI:15507 | Beta-Alanyl-CoA                                     | C24H41N8O17P3S | 837.145214  | No |
| 13593 | HMDB0042113                      | TG(14:0/15:0/22:5(4Z,7Z,10Z,13Z,16Z))               | C54H94O6       | 837.6978923 | No |
| 13593 | HMDB0042118                      | TG(14:0/15:0/22:5(7Z,10Z,13Z,16Z,19Z))              | C54H94O6       | 837.6978923 | No |
| 13593 | HMDB0042722                      | TG(14:0/22:5(4Z,7Z,10Z,13Z,16Z)/15:0)               | C54H94O6       | 837.6978923 | No |
| 13593 | HMDB0042872                      | TG(14:0/22:5(7Z,10Z,13Z,16Z,19Z)/15:0)              | C54H94O6       | 837.6978923 | No |
| 13593 | HMDB0042981                      | TG(15:0/14:0/22:5(4Z,7Z,10Z,13Z,16Z))               | C54H94O6       | 837.6978923 | No |
| 13593 | HMDB0042986                      | TG(15:0/14:0/22:5(7Z,10Z,13Z,16Z,19Z))              | C54H94O6       | 837.6978923 | No |
| 13593 | HMDB0043043                      | TG(15:0/16:0/20:5(5Z,8Z,11Z,14Z,17Z))               | C54H94O6       | 837.6978923 | No |
| 13593 | HMDB0043183                      | TG(15:0/14:1(9Z)/22:4(7Z,10Z,13Z,16Z))              | C54H94O6       | 837.6978923 | No |
| 13593 | HMDB0043210                      | TG(15:0/16:1(9Z)/20:4(5Z,8Z,11Z,14Z))               | C54H94O6       | 837.6978923 | No |
| 13593 | HMDB0043216                      | TG(15:0/16:1(9Z)/20:4(8Z,11Z,14Z,17Z))              | C54H94O6       | 837.6978923 | No |
| 13593 | HMDB0043244                      | TG(15:0/18:1(11Z)/18:4(6Z,9Z,12Z,15Z))              | C54H94O6       | 837.6978923 | No |
| 13593 | HMDB0043273                      | TG(15:0/18:1(9Z)/18:4(6Z,9Z,12Z,15Z))               | C54H94O6       | 837.6978923 | No |
| 13593 | HMDB0043410                      | TG(15:0/18:2(9Z,12Z)/18:3(6Z,9Z,12Z))               | C54H94O6       | 837.6978923 | No |
| 13593 | HMDB0043417                      | TG(15:0/18:2(9Z,12Z)/18:3(9Z,12Z,15Z))              | C54H94O6       | 837.6978923 | No |
| 13593 | HMDB0043438                      | TG(15:0/18:3(6Z,9Z,12Z)/18:2(9Z,12Z))               | C54H94O6       | 837.6978923 | No |
| 13593 | HMDB0043518                      | TG(15:0/20:4(5Z,8Z,11Z,14Z)/16:1(9Z))               | C54H94O6       | 837.6978923 | No |
| 13593 | HMDB0043575                      | TG(15:0/22:4(7Z,10Z,13Z,16Z)/14:1(9Z))              | C54H94O6       | 837.6978923 | No |
| 13593 | HMDB0043641                      | TG(15:0/18:3(9Z,12Z,15Z)/18:2(9Z,12Z))              | C54H94O6       | 837.6978923 | No |
| 13593 | HMDB0043664                      | TG(15:0/18:4(6Z,9Z,12Z,15Z)/18:1(11Z))              | C54H94O6       | 837.6978923 | No |
| 13593 | HMDB0043665                      | TG(15:0/18:4(6Z,9Z,12Z,15Z)/18:1(9Z))               | C54H94O6       | 837.6978923 | No |
| 13593 | HMDB0043692                      | TG(15:0/20:4(8Z,11Z,14Z,17Z)/16:1(9Z))              | C54H94O6       | 837.6978923 | No |
| 13593 | HMDB0043715                      | TG(15:0/20:5(5Z,8Z,11Z,14Z,17Z)/16:0)               | C54H94O6       | 837.6978923 | No |
| 13593 | HMDB0043881                      | TG(16:0/15:0/20:5(5Z,8Z,11Z,14Z,17Z))               | C54H94O6       | 837.6978923 | No |
| 13593 | HMDB0047761                      | TG(14:1(9Z)/15:0/22:4(7Z,10Z,13Z,16Z))              | C54H94O6       | 837.6978923 | No |
| 13593 | HMDB0048446                      | TG(16:1(9Z)/15:0/20:4(5Z,8Z,11Z,14Z))               | C54H94O6       | 837.6978923 | No |
| 13593 | HMDB0048452                      | TG(16:1(9Z)/15:0/20:4(8Z,11Z,14Z,17Z))              | C54H94O6       | 837.6978923 | No |
| 13593 | HMDB0049108                      | TG(18:1(11Z)/15:0/18:4(6Z,9Z,12Z,15Z))              | C54H94O6       | 837.6978923 | No |
| 13593 | HMDB0049735                      | TG(18:1(9Z)/15:0/18:4(6Z,9Z,12Z,15Z))               | C54H94O6       | 837.6978923 | No |
| 13593 | HMDB0052412                      | TG(18:2(9Z,12Z)/15:0/18:3(6Z,9Z,12Z))               | C54H94O6       | 837.6978923 | No |
| 13593 | HMDB0052419                      | TG(18:2(9Z,12Z)/15:0/18:3(9Z,12Z,15Z))              | C54H94O6       | 837.6978923 | No |
| 13609 | HMDB0032812                      | Isofucosterol 3-O-[6-O-Octadecanoyl-b-D-glucopyrano | C53H92O7       | 839.6758662 | No |
| 13609 | HMDB0034089                      | Sitoindoside II                                     | C53H92O7       | 839.6758662 | No |
| 13614 | HMDB0033805                      | Azaspiracid                                         | C47H71NO12     | 840.4901821 | No |
| 13615 | HMDB0008026; C00157              | PC(16:1(9Z)/24:1(15Z))                              | C48H92NO8P     | 840.6485432 | No |
| 13615 | HMDB0008053; C00157              | PC(18:0/22:2(13Z,16Z))                              | C48H92NO8P     | 840.6485432 | No |
| 13615 | HMDB0008085; C00157              | PC(18:1(11Z)/22:1(13Z))                             | C48H92NO8P     | 840.6485432 | No |
| 13615 | HMDB0008118; C00157              | PC(18:1(9Z)/22:1(13Z))                              | C48H92NO8P     | 840.6485432 | No |
| 13615 | HMDB0008150; C00157              | PC(18:2(9Z,12Z)/22:0)                               | C48H92NO8P     | 840.6485432 | No |
| 13615 | HMDB0008276; C00157              | PC(20:0/20:2(11Z,14Z))                              | C48H92NO8P     | 840.6485432 | No |
| 13615 | HMDB0008308; C00157              | PC(20:1(11Z)/20:1(11Z))                             | C48H92NO8P     | 840.6485432 | No |
| 13615 | HMDB0008340; C00157              | PC(20:2(11Z,14Z)/20:0)                              | C48H92NO8P     | 840.6485432 | No |
| 13615 | HMDB0008533; C00157              | PC(22:0/18:2(9Z,12Z))                               | C48H92NO8P     | 840.6485432 | No |
| 13615 | HMDB0008564; C00157              | PC(22:1(13Z)/18:1(9Z))                              | C48H92NO8P     | 840.6485432 | No |
| 13615 | HMDB0008595; C00157              | PC(22:2(13Z,16Z)/18:0)                              | C48H92NO8P     | 840.6485432 | No |
| 13615 | HMDB0008792; C00157              | PC(24:1(15Z)/16:1(9Z))                              | C48H92NO8P     | 840.6485432 | No |
| 13615 | HMDB0011202                      | PC(22:1(13Z)/18:1(11Z))                             | C48H92NO8P     | 840.6485432 | No |
| 13615 | HMDB0113136                      | PE-NMe(18:1(11Z)/24:1(15Z))                         | C48H92NO8P     | 840.6485432 | No |
| 13615 | HMDB0113163                      | PE-NMe(18:1(9Z)/24:1(15Z))                          | C48H92NO8P     | 840.6485432 | No |
| 13615 | HMDB0113191                      | PE-NMe(18:2(9Z,12Z)/24:0)                           | C48H92NO8P     | 840.6485432 | No |
| 13615 | HMDB0113301                      | PE-NMe(20:0/22:2(13Z,16Z))                          | C48H92NO8P     | 840.6485432 | No |
| 13615 | HMDB0113329                      | PE-NMe(20:1(11Z)/22:1(13Z))                         | C48H92NO8P     | 840.6485432 | No |

|       |                                  |                                                    |             |             |    |
|-------|----------------------------------|----------------------------------------------------|-------------|-------------|----|
| 13615 | HMDB0113357                      | PE-NMe(20:2(11Z,14Z)/22:0)                         | C48H92NO8P  | 840.6485432 | No |
| 13615 | HMDB0113522                      | PE-NMe(22:0/20:2(11Z,14Z))                         | C48H92NO8P  | 840.6485432 | No |
| 13615 | HMDB0113548                      | PE-NMe(22:1(13Z)/20:1(11Z))                        | C48H92NO8P  | 840.6485432 | No |
| 13615 | HMDB0113575                      | PE-NMe(22:2(13Z,16Z)/20:0)                         | C48H92NO8P  | 840.6485432 | No |
| 13615 | HMDB0113709                      | PE-NMe(24:0/18:2(9Z,12Z))                          | C48H92NO8P  | 840.6485432 | No |
| 13615 | HMDB0113734                      | PE-NMe(24:1(15Z)/18:1(11Z))                        | C48H92NO8P  | 840.6485432 | No |
| 13615 | HMDB0113735                      | PE-NMe(24:1(15Z)/18:1(9Z))                         | C48H92NO8P  | 840.6485432 | No |
| 13645 | HMDB0042600                      | TG(14:0/20:2n6/o-18:0)                             | C55H104O5   | 843.7818335 | No |
| 13645 | HMDB0042948                      | TG(14:0/o-18:0/20:2n6)                             | C55H104O5   | 843.7818335 | No |
| 13645 | HMDB0044276                      | TG(16:0/18:2(9Z,12Z)/o-18:0)                       | C55H104O5   | 843.7818335 | No |
| 13645 | HMDB0044654                      | TG(16:0/o-18:0/18:2(9Z,12Z))                       | C55H104O5   | 843.7818335 | No |
| 13645 | HMDB0047999                      | TG(14:1(9Z)/20:1(11Z)/o-18:0)                      | C55H104O5   | 843.7818335 | No |
| 13645 | HMDB0048395                      | TG(14:1(9Z)/o-18:0/20:1(11Z))                      | C55H104O5   | 843.7818335 | No |
| 13645 | HMDB0048632                      | TG(16:1(9Z)/18:1(11Z)/o-18:0)                      | C55H104O5   | 843.7818335 | No |
| 13645 | HMDB0048654                      | TG(16:1(9Z)/18:1(9Z)/o-18:0)                       | C55H104O5   | 843.7818335 | No |
| 13645 | HMDB0049052                      | TG(16:1(9Z)/o-18:0/18:1(11Z))                      | C55H104O5   | 843.7818335 | No |
| 13645 | HMDB0049053                      | TG(16:1(9Z)/o-18:0/18:1(9Z))                       | C55H104O5   | 843.7818335 | No |
| 13645 | HMDB0049260                      | TG(18:1(11Z)/16:1(9Z)/o-18:0)                      | C55H104O5   | 843.7818335 | No |
| 13645 | HMDB0049880                      | TG(18:1(9Z)/16:1(9Z)/o-18:0)                       | C55H104O5   | 843.7818335 | No |
| 13645 | HMDB0050451                      | TG(20:1(11Z)/14:1(9Z)/o-18:0)                      | C55H104O5   | 843.7818335 | No |
| 13645 | HMDB0052440                      | TG(18:2(9Z,12Z)/16:0/o-18:0)                       | C55H104O5   | 843.7818335 | No |
| 13645 | HMDB0053276                      | TG(20:2n6/14:0/o-18:0)                             | C55H104O5   | 843.7818335 | No |
| 13664 | HMDB0013568                      | PGP(18:3(6Z,9Z,12Z)/18:3(6Z,9Z,12Z))               | C42H72O13P2 | 845.4358457 | No |
| 13664 | HMDB0013569                      | PGP(18:3(6Z,9Z,12Z)/18:3(9Z,12Z,15Z))              | C42H72O13P2 | 845.4358457 | No |
| 13664 | HMDB0013583                      | PGP(18:3(9Z,12Z,15Z)/18:3(6Z,9Z,12Z))              | C42H72O13P2 | 845.4358457 | No |
| 13664 | HMDB0013584                      | PGP(18:3(9Z,12Z,15Z)/18:3(9Z,12Z,15Z))             | C42H72O13P2 | 845.4358457 | No |
| 13664 | HMDB0014753; C07235; CHEBI:45367 | Rifabutin                                          | C46H62N4O11 | 845.4358457 | No |
| 13671 | HMDB0042567                      | TG(14:0/18:3(6Z,9Z,12Z)/20:5(5Z,8Z,11Z,14Z,17Z))   | C55H90O6    | 845.6655777 | No |
| 13671 | HMDB0042655                      | TG(14:0/20:4(5Z,8Z,11Z,14Z)/18:4(6Z,9Z,12Z,15Z))   | C55H90O6    | 845.6655777 | No |
| 13671 | HMDB0042777                      | TG(14:0/18:3(9Z,12Z,15Z)/20:5(5Z,8Z,11Z,14Z,17Z))  | C55H90O6    | 845.6655777 | No |
| 13671 | HMDB0042800                      | TG(14:0/18:4(6Z,9Z,12Z,15Z)/20:4(5Z,8Z,11Z,14Z))   | C55H90O6    | 845.6655777 | No |
| 13671 | HMDB0042806                      | TG(14:0/18:4(6Z,9Z,12Z,15Z)/20:4(8Z,11Z,14Z,17Z))  | C55H90O6    | 845.6655777 | No |
| 13671 | HMDB0042835                      | TG(14:0/20:4(8Z,11Z,14Z,17Z)/18:4(6Z,9Z,12Z,15Z))  | C55H90O6    | 845.6655777 | No |
| 13671 | HMDB0042857                      | TG(14:0/20:5(5Z,8Z,11Z,14Z,17Z)/18:3(6Z,9Z,12Z))   | C55H90O6    | 845.6655777 | No |
| 13671 | HMDB0042864                      | TG(14:0/20:5(5Z,8Z,11Z,14Z,17Z)/18:3(9Z,12Z,15Z))  | C55H90O6    | 845.6655777 | No |
| 13671 | HMDB0044523                      | TG(16:0/18:4(6Z,9Z,12Z,15Z)/18:4(6Z,9Z,12Z,15Z))   | C55H90O6    | 845.6655777 | No |
| 13671 | HMDB0047929                      | TG(14:1(9Z)/16:1(9Z)/22:6(4Z,7Z,10Z,13Z,16Z,19Z))  | C55H90O6    | 845.6655777 | No |
| 13671 | HMDB0048017                      | TG(14:1(9Z)/20:3(5Z,8Z,11Z)/18:4(6Z,9Z,12Z,15Z))   | C55H90O6    | 845.6655777 | No |
| 13671 | HMDB0048088                      | TG(14:1(9Z)/18:2(9Z,12Z)/20:5(5Z,8Z,11Z,14Z,17Z))  | C55H90O6    | 845.6655777 | No |
| 13671 | HMDB0048104                      | TG(14:1(9Z)/18:3(6Z,9Z,12Z)/20:4(5Z,8Z,11Z,14Z))   | C55H90O6    | 845.6655777 | No |
| 13671 | HMDB0048110                      | TG(14:1(9Z)/18:3(6Z,9Z,12Z)/20:4(8Z,11Z,14Z,17Z))  | C55H90O6    | 845.6655777 | No |
| 13671 | HMDB0048155                      | TG(14:1(9Z)/20:3n6/18:4(6Z,9Z,12Z,15Z))            | C55H90O6    | 845.6655777 | No |
| 13671 | HMDB0048170                      | TG(14:1(9Z)/20:4(5Z,8Z,11Z,14Z)/18:3(6Z,9Z,12Z))   | C55H90O6    | 845.6655777 | No |
| 13671 | HMDB0048177                      | TG(14:1(9Z)/20:4(5Z,8Z,11Z,14Z)/18:3(9Z,12Z,15Z))  | C55H90O6    | 845.6655777 | No |
| 13671 | HMDB0048265                      | TG(14:1(9Z)/18:3(9Z,12Z,15Z)/20:4(5Z,8Z,11Z,14Z))  | C55H90O6    | 845.6655777 | No |
| 13671 | HMDB0048271                      | TG(14:1(9Z)/18:3(9Z,12Z,15Z)/20:4(8Z,11Z,14Z,17Z)) | C55H90O6    | 845.6655777 | No |
| 13671 | HMDB0048281                      | TG(14:1(9Z)/18:4(6Z,9Z,12Z,15Z)/20:3(5Z,8Z,11Z))   | C55H90O6    | 845.6655777 | No |
| 13671 | HMDB0048287                      | TG(14:1(9Z)/18:4(6Z,9Z,12Z,15Z)/20:3n6)            | C55H90O6    | 845.6655777 | No |
| 13671 | HMDB0048308                      | TG(14:1(9Z)/20:4(8Z,11Z,14Z,17Z)/18:3(6Z,9Z,12Z))  | C55H90O6    | 845.6655777 | No |
| 13671 | HMDB0048315                      | TG(14:1(9Z)/20:4(8Z,11Z,14Z,17Z)/18:3(9Z,12Z,15Z)) | C55H90O6    | 845.6655777 | No |
| 13671 | HMDB0048330                      | TG(14:1(9Z)/20:5(5Z,8Z,11Z,14Z,17Z)/18:2(9Z,12Z))  | C55H90O6    | 845.6655777 | No |
| 13671 | HMDB0048369                      | TG(14:1(9Z)/22:6(4Z,7Z,10Z,13Z,16Z,19Z)/16:1(9Z))  | C55H90O6    | 845.6655777 | No |
| 13671 | HMDB0048587                      | TG(16:1(9Z)/14:1(9Z)/22:6(4Z,7Z,10Z,13Z,16Z,19Z))  | C55H90O6    | 845.6655777 | No |
| 13671 | HMDB0048781                      | TG(16:1(9Z)/18:3(6Z,9Z,12Z)/18:4(6Z,9Z,12Z,15Z))   | C55H90O6    | 845.6655777 | No |
| 13671 | HMDB0048935                      | TG(16:1(9Z)/18:3(9Z,12Z,15Z)/18:4(6Z,9Z,12Z,15Z))  | C55H90O6    | 845.6655777 | No |
| 13671 | HMDB0048949                      | TG(16:1(9Z)/18:4(6Z,9Z,12Z,15Z)/18:3(6Z,9Z,12Z))   | C55H90O6    | 845.6655777 | No |
| 13671 | HMDB0048956                      | TG(16:1(9Z)/18:4(6Z,9Z,12Z,15Z)/18:3(9Z,12Z,15Z))  | C55H90O6    | 845.6655777 | No |
| 13671 | HMDB0051007                      | TG(20:3(5Z,8Z,11Z)/14:1(9Z)/18:4(6Z,9Z,12Z,15Z))   | C55H90O6    | 845.6655777 | No |
| 13671 | HMDB0052512                      | TG(18:2(9Z,12Z)/14:1(9Z)/20:5(5Z,8Z,11Z,14Z,17Z))  | C55H90O6    | 845.6655777 | No |
| 13671 | HMDB0052855                      | TG(18:3(6Z,9Z,12Z)/14:0/20:5(5Z,8Z,11Z,14Z,17Z))   | C55H90O6    | 845.6655777 | No |
| 13671 | HMDB0052946                      | TG(18:3(6Z,9Z,12Z)/14:1(9Z)/20:4(5Z,8Z,11Z,14Z))   | C55H90O6    | 845.6655777 | No |

|       |                          |                                                      |             |             |    |
|-------|--------------------------|------------------------------------------------------|-------------|-------------|----|
| 13671 | HMDB0052952              | TG(18:3(6Z,9Z,12Z)/14:1(9Z)/20:4(8Z,11Z,14Z,17Z))    | C55H90O6    | 845.6655777 | No |
| 13671 | HMDB0052965              | TG(18:3(6Z,9Z,12Z)/16:1(9Z)/18:4(6Z,9Z,12Z,15Z))     | C55H90O6    | 845.6655777 | No |
| 13671 | HMDB0053743              | TG(20:3n6/14:1(9Z)/18:4(6Z,9Z,12Z,15Z))              | C55H90O6    | 845.6655777 | No |
| 13671 | HMDB0054017              | TG(20:4(5Z,8Z,11Z,14Z)/14:0/18:4(6Z,9Z,12Z,15Z))     | C55H90O6    | 845.6655777 | No |
| 13671 | HMDB0054093              | TG(20:4(5Z,8Z,11Z,14Z)/14:1(9Z)/18:3(9Z,12Z,15Z))    | C55H90O6    | 845.6655777 | No |
| 13671 | HMDB0055151              | TG(18:3(9Z,12Z,15Z)/14:0/20:5(5Z,8Z,11Z,14Z,17Z))    | C55H90O6    | 845.6655777 | No |
| 13671 | HMDB0055199              | TG(18:3(9Z,12Z,15Z)/14:1(9Z)/20:4(8Z,11Z,14Z,17Z))   | C55H90O6    | 845.6655777 | No |
| 13671 | HMDB0055205              | TG(18:3(9Z,12Z,15Z)/16:1(9Z)/18:4(6Z,9Z,12Z,15Z))    | C55H90O6    | 845.6655777 | No |
| 13671 | HMDB0055358              | TG(18:4(6Z,9Z,12Z,15Z)/14:0/20:4(8Z,11Z,14Z,17Z))    | C55H90O6    | 845.6655777 | No |
| 13671 | HMDB0055369              | TG(18:4(6Z,9Z,12Z,15Z)/16:0/18:4(6Z,9Z,12Z,15Z))     | C55H90O6    | 845.6655777 | No |
| 13672 | HMDB0042104              | TG(14:0/15:0/22:1(13Z))                              | C54H102O6   | 845.7622773 | No |
| 13672 | HMDB0042452              | TG(14:0/22:1(13Z)/15:0)                              | C54H102O6   | 845.7622773 | No |
| 13672 | HMDB0042972              | TG(15:0/14:0/22:1(13Z))                              | C54H102O6   | 845.7622773 | No |
| 13672 | HMDB0043028              | TG(15:0/16:0/20:1(11Z))                              | C54H102O6   | 845.7622773 | No |
| 13672 | HMDB0043055              | TG(15:0/18:0/18:1(11Z))                              | C54H102O6   | 845.7622773 | No |
| 13672 | HMDB0043056              | TG(15:0/18:0/18:1(9Z))                               | C54H102O6   | 845.7622773 | No |
| 13672 | HMDB0043083              | TG(15:0/20:0/16:1(9Z))                               | C54H102O6   | 845.7622773 | No |
| 13672 | HMDB0043111              | TG(15:0/22:0/14:1(9Z))                               | C54H102O6   | 845.7622773 | No |
| 13672 | HMDB0043167              | TG(15:0/14:1(9Z)/22:0)                               | C54H102O6   | 845.7622773 | No |
| 13672 | HMDB0043195              | TG(15:0/16:1(9Z)/20:0)                               | C54H102O6   | 845.7622773 | No |
| 13672 | HMDB0043223              | TG(15:0/18:1(11Z)/18:0)                              | C54H102O6   | 845.7622773 | No |
| 13672 | HMDB0043252              | TG(15:0/18:1(9Z)/18:0)                               | C54H102O6   | 845.7622773 | No |
| 13672 | HMDB0043280              | TG(15:0/20:1(11Z)/16:0)                              | C54H102O6   | 845.7622773 | No |
| 13672 | HMDB0043866              | TG(16:0/15:0/20:1(11Z))                              | C54H102O6   | 845.7622773 | No |
| 13672 | HMDB0044701              | TG(18:0/15:0/18:1(11Z))                              | C54H102O6   | 845.7622773 | No |
| 13672 | HMDB0044702              | TG(18:0/15:0/18:1(9Z))                               | C54H102O6   | 845.7622773 | No |
| 13672 | HMDB0045507              | TG(20:0/15:0/16:1(9Z))                               | C54H102O6   | 845.7622773 | No |
| 13672 | HMDB0046283              | TG(22:0/15:0/14:1(9Z))                               | C54H102O6   | 845.7622773 | No |
| 13706 | HMDB0034601              | Hebevinoside XI                                      | C46H74O14   | 849.4989956 | No |
| 13706 | HMDB0035981              | Hebevinoside V                                       | C46H74O14   | 849.4989956 | No |
| 13708 | HMDB0062350; CHEBI:64182 | 3-demethylubiquinol-10                               | C58H90O4    | 849.674775  | No |
| 13738 | HMDB0041548              | Hovenidulcioside B1                                  | C44H70O16   | 853.4571691 | No |
| 13739 | HMDB0013507              | PGP(18:0/18:2(9Z,12Z))                               | C42H80O13P2 | 853.4993728 | No |
| 13739 | HMDB0013520              | PGP(18:1(11Z)/18:1(11Z))                             | C42H80O13P2 | 853.4993728 | No |
| 13739 | HMDB0013521              | PGP(18:1(11Z)/18:1(9Z))                              | C42H80O13P2 | 853.4993728 | No |
| 13739 | HMDB0013535              | PGP(18:1(9Z)/18:1(11Z))                              | C42H80O13P2 | 853.4993728 | No |
| 13739 | HMDB0013536              | PGP(18:1(9Z)/18:1(9Z))                               | C42H80O13P2 | 853.4993728 | No |
| 13739 | HMDB0013549              | PGP(18:2(9Z,12Z)/18:0)                               | C42H80O13P2 | 853.4993728 | No |
| 13745 | HMDB0012439              | PS(20:4(5Z,8Z,11Z,14Z)/22:6(4Z,7Z,10Z,13Z,16Z,19Z))  | C48H74NO10P | 854.4998277 | No |
| 13745 | HMDB0012449              | PS(22:6(4Z,7Z,10Z,13Z,16Z,19Z)/20:4(5Z,8Z,11Z,14Z))  | C48H74NO10P | 854.4998277 | No |
| 13745 | HMDB0112677              | PS(20:4(8Z,11Z,14Z,17Z)/22:6(4Z,7Z,10Z,13Z,16Z,19Z)) | C48H74NO10P | 854.4998277 | No |
| 13745 | HMDB0112702              | PS(20:5(5Z,8Z,11Z,14Z,17Z)/22:5(4Z,7Z,10Z,13Z,16Z))  | C48H74NO10P | 854.4998277 | No |
| 13745 | HMDB0112703              | PS(20:5(5Z,8Z,11Z,14Z,17Z)/22:5(7Z,10Z,13Z,16Z,19Z)) | C48H74NO10P | 854.4998277 | No |
| 13745 | HMDB0112831              | PS(22:5(4Z,7Z,10Z,13Z,16Z)/20:5(5Z,8Z,11Z,14Z,17Z))  | C48H74NO10P | 854.4998277 | No |
| 13745 | HMDB0112872              | PS(22:6(4Z,7Z,10Z,13Z,16Z,19Z)/20:4(8Z,11Z,14Z,17Z)) | C48H74NO10P | 854.4998277 | No |
| 13745 | HMDB0116790              | PS(22:5(7Z,10Z,13Z,16Z,19Z)/20:5(5Z,8Z,11Z,14Z,17Z)) | C48H74NO10P | 854.4998277 | No |
| 13769 | HMDB0009789; C00626      | PI(16:0/20:4(5Z,8Z,11Z,14Z))                         | C45H79O13P  | 857.516061  | No |
| 13769 | HMDB0009790; C00626      | PI(16:0/20:4(8Z,11Z,14Z,17Z))                        | C45H79O13P  | 857.516061  | No |
| 13769 | HMDB0009827; C00626      | PI(18:1(11Z)/18:3(6Z,9Z,12Z))                        | C45H79O13P  | 857.516061  | No |
| 13769 | HMDB0009828; C00626      | PI(18:1(11Z)/18:3(9Z,12Z,15Z))                       | C45H79O13P  | 857.516061  | No |
| 13769 | HMDB0009839; C00626      | PI(18:1(9Z)/18:3(6Z,9Z,12Z))                         | C45H79O13P  | 857.516061  | No |
| 13769 | HMDB0009840; C00626      | PI(18:1(9Z)/18:3(9Z,12Z,15Z))                        | C45H79O13P  | 857.516061  | No |
| 13769 | HMDB0009850; C00626      | PI(18:2(9Z,12Z)/18:2(9Z,12Z))                        | C45H79O13P  | 857.516061  | No |
| 13769 | HMDB0009859; C00626      | PI(18:3(6Z,9Z,12Z)/18:1(11Z))                        | C45H79O13P  | 857.516061  | No |
| 13769 | HMDB0009860; C00626      | PI(18:3(6Z,9Z,12Z)/18:1(9Z))                         | C45H79O13P  | 857.516061  | No |
| 13769 | HMDB0009863; C00626      | PI(18:3(9Z,12Z,15Z)/18:1(11Z))                       | C45H79O13P  | 857.516061  | No |
| 13769 | HMDB0009864; C00626      | PI(18:3(9Z,12Z,15Z)/18:1(9Z))                        | C45H79O13P  | 857.516061  | No |
| 13769 | HMDB0009893; C00626      | PI(20:4(5Z,8Z,11Z,14Z)/16:0)                         | C45H79O13P  | 857.516061  | No |
| 13769 | HMDB0009899; C00626      | PI(20:4(8Z,11Z,14Z,17Z)/16:0)                        | C45H79O13P  | 857.516061  | No |
| 13769 | HMDB0062771              | 1,2-dilinoleoyl-sn-glycero-3-phospho-1D-myo-inositol | C45H79O13P  | 857.516061  | No |
| 13813 | HMDB0043104              | TG(15:0/20:0/o-18:0)                                 | C56H110O5   | 861.8299156 | No |



|       |                                  |                                                 |             |             |    |
|-------|----------------------------------|-------------------------------------------------|-------------|-------------|----|
| 13813 | HMDB0043804                      | TG(15:0/o-18:0/20:0)                            | C56H110O5   | 861.8299156 | No |
| 13813 | HMDB0045528                      | TG(20:0/15:0/o-18:0)                            | C56H110O5   | 861.8299156 | No |
| 13863 | HMDB0041351                      | Koryoginsenoside R1                             | C46H76O15   | 867.5082825 | No |
| 13917 | HMDB0033490                      | Pectenotoxin 1                                  | C47H70O15   | 873.465657  | No |
| 13938 | HMDB0015332; C08059; CHEBI:45304 | Rifapentine                                     | C47H64N4O12 | 875.4436297 | No |
| 13942 | HMDB0005447; C00422              | TG(16:1(9Z)/18:2(9Z,12Z)/20:4(5Z,8Z,11Z,14Z))   | C57H96O6    | 875.7107486 | No |
| 13942 | HMDB0010475                      | TG(18:2(9Z,12Z)/16:0/20:5(5Z,8Z,11Z,14Z,17Z))   | C57H96O6    | 875.7107486 | No |
| 13942 | HMDB0010489                      | TG(18:2(9Z,12Z)/18:2(9Z,12Z)/18:3(6Z,9Z,12Z))   | C57H96O6    | 875.7107486 | No |
| 13942 | HMDB0010490                      | TG(18:2(9Z,12Z)/18:2(9Z,12Z)/18:3(9Z,12Z,15Z))  | C57H96O6    | 875.7107486 | No |
| 13942 | HMDB0010502                      | TG(18:3(9Z,12Z,15Z)/18:1(11Z)/18:3(9Z,12Z,15Z)) | C57H96O6    | 875.7107486 | No |
| 13942 | HMDB0010503                      | TG(18:3(9Z,12Z,15Z)/18:1(9Z)/18:3(9Z,12Z,15Z))  | C57H96O6    | 875.7107486 | No |
| 13942 | HMDB0010519                      | TG(20:4(5Z,8Z,11Z,14Z)/16:0/18:3(9Z,12Z,15Z))   | C57H96O6    | 875.7107486 | No |
| 13942 | HMDB0042359                      | TG(14:0/18:1(11Z)/22:6(4Z,7Z,10Z,13Z,16Z,19Z))  | C57H96O6    | 875.7107486 | No |
| 13942 | HMDB0042389                      | TG(14:0/18:1(9Z)/22:6(4Z,7Z,10Z,13Z,16Z,19Z))   | C57H96O6    | 875.7107486 | No |
| 13942 | HMDB0042440                      | TG(14:0/20:3(5Z,8Z,11Z)/20:4(5Z,8Z,11Z,14Z))    | C57H96O6    | 875.7107486 | No |
| 13942 | HMDB0042446                      | TG(14:0/20:3(5Z,8Z,11Z)/20:4(8Z,11Z,14Z,17Z))   | C57H96O6    | 875.7107486 | No |
| 13942 | HMDB0042533                      | TG(14:0/18:2(9Z,12Z)/22:5(4Z,7Z,10Z,13Z,16Z))   | C57H96O6    | 875.7107486 | No |
| 13942 | HMDB0042538                      | TG(14:0/18:2(9Z,12Z)/22:5(7Z,10Z,13Z,16Z,19Z))  | C57H96O6    | 875.7107486 | No |
| 13942 | HMDB0042562                      | TG(14:0/18:3(6Z,9Z,12Z)/22:4(7Z,10Z,13Z,16Z))   | C57H96O6    | 875.7107486 | No |
| 13942 | HMDB0042597                      | TG(14:0/20:2n6/20:5(5Z,8Z,11Z,14Z,17Z))         | C57H96O6    | 875.7107486 | No |
| 13942 | HMDB0042620                      | TG(14:0/20:3n6/20:4(5Z,8Z,11Z,14Z))             | C57H96O6    | 875.7107486 | No |
| 13942 | HMDB0042626                      | TG(14:0/20:3n6/20:4(8Z,11Z,14Z,17Z))            | C57H96O6    | 875.7107486 | No |
| 13942 | HMDB0042643                      | TG(14:0/20:4(5Z,8Z,11Z,14Z)/20:3(5Z,8Z,11Z))    | C57H96O6    | 875.7107486 | No |
| 13942 | HMDB0042649                      | TG(14:0/20:4(5Z,8Z,11Z,14Z)/20:3n6)             | C57H96O6    | 875.7107486 | No |
| 13942 | HMDB0042707                      | TG(14:0/22:4(7Z,10Z,13Z,16Z)/18:3(6Z,9Z,12Z))   | C57H96O6    | 875.7107486 | No |
| 13942 | HMDB0042714                      | TG(14:0/22:4(7Z,10Z,13Z,16Z)/18:3(9Z,12Z,15Z))  | C57H96O6    | 875.7107486 | No |
| 13942 | HMDB0042736                      | TG(14:0/22:5(4Z,7Z,10Z,13Z,16Z)/18:2(9Z,12Z))   | C57H96O6    | 875.7107486 | No |
| 13942 | HMDB0042772                      | TG(14:0/18:3(9Z,12Z,15Z)/22:4(7Z,10Z,13Z,16Z))  | C57H96O6    | 875.7107486 | No |
| 13942 | HMDB0042823                      | TG(14:0/20:4(8Z,11Z,14Z,17Z)/20:3(5Z,8Z,11Z))   | C57H96O6    | 875.7107486 | No |
| 13942 | HMDB0042829                      | TG(14:0/20:4(8Z,11Z,14Z,17Z)/20:3n6)            | C57H96O6    | 875.7107486 | No |
| 13942 | HMDB0042858                      | TG(14:0/20:5(5Z,8Z,11Z,14Z,17Z)/20:2n6)         | C57H96O6    | 875.7107486 | No |
| 13942 | HMDB0042886                      | TG(14:0/22:5(7Z,10Z,13Z,16Z,19Z)/18:2(9Z,12Z))  | C57H96O6    | 875.7107486 | No |
| 13942 | HMDB0042910                      | TG(14:0/22:6(4Z,7Z,10Z,13Z,16Z,19Z)/18:1(11Z))  | C57H96O6    | 875.7107486 | No |
| 13942 | HMDB0042911                      | TG(14:0/22:6(4Z,7Z,10Z,13Z,16Z,19Z)/18:1(9Z))   | C57H96O6    | 875.7107486 | No |
| 13942 | HMDB0044079                      | TG(16:0/16:1(9Z)/22:6(4Z,7Z,10Z,13Z,16Z,19Z))   | C57H96O6    | 875.7107486 | No |
| 13942 | HMDB0044187                      | TG(16:0/20:3(5Z,8Z,11Z)/18:4(6Z,9Z,12Z,15Z))    | C57H96O6    | 875.7107486 | No |
| 13942 | HMDB0044273                      | TG(16:0/18:2(9Z,12Z)/20:5(5Z,8Z,11Z,14Z,17Z))   | C57H96O6    | 875.7107486 | No |
| 13942 | HMDB0044294                      | TG(16:0/18:3(6Z,9Z,12Z)/20:4(5Z,8Z,11Z,14Z))    | C57H96O6    | 875.7107486 | No |
| 13942 | HMDB0044300                      | TG(16:0/18:3(6Z,9Z,12Z)/20:4(8Z,11Z,14Z,17Z))   | C57H96O6    | 875.7107486 | No |
| 13942 | HMDB0044355                      | TG(16:0/20:3n6/18:4(6Z,9Z,12Z,15Z))             | C57H96O6    | 875.7107486 | No |
| 13942 | HMDB0044375                      | TG(16:0/20:4(5Z,8Z,11Z,14Z)/18:3(6Z,9Z,12Z))    | C57H96O6    | 875.7107486 | No |
| 13942 | HMDB0044382                      | TG(16:0/20:4(5Z,8Z,11Z,14Z)/18:3(9Z,12Z,15Z))   | C57H96O6    | 875.7107486 | No |
| 13942 | HMDB0044490                      | TG(16:0/18:3(9Z,12Z,15Z)/20:4(5Z,8Z,11Z,14Z))   | C57H96O6    | 875.7107486 | No |
| 13942 | HMDB0044496                      | TG(16:0/18:3(9Z,12Z,15Z)/20:4(8Z,11Z,14Z,17Z))  | C57H96O6    | 875.7107486 | No |
| 13942 | HMDB0044511                      | TG(16:0/18:4(6Z,9Z,12Z,15Z)/20:3(5Z,8Z,11Z))    | C57H96O6    | 875.7107486 | No |
| 13942 | HMDB0044517                      | TG(16:0/18:4(6Z,9Z,12Z,15Z)/20:3n6)             | C57H96O6    | 875.7107486 | No |
| 13942 | HMDB0044543                      | TG(16:0/20:4(8Z,11Z,14Z,17Z)/18:3(6Z,9Z,12Z))   | C57H96O6    | 875.7107486 | No |
| 13942 | HMDB0044550                      | TG(16:0/20:4(8Z,11Z,14Z,17Z)/18:3(9Z,12Z,15Z))  | C57H96O6    | 875.7107486 | No |
| 13942 | HMDB0044570                      | TG(16:0/20:5(5Z,8Z,11Z,14Z,17Z)/18:2(9Z,12Z))   | C57H96O6    | 875.7107486 | No |
| 13942 | HMDB0044619                      | TG(16:0/22:6(4Z,7Z,10Z,13Z,16Z,19Z)/16:1(9Z))   | C57H96O6    | 875.7107486 | No |
| 13942 | HMDB0044882                      | TG(18:0/14:1(9Z)/22:6(4Z,7Z,10Z,13Z,16Z,19Z))   | C57H96O6    | 875.7107486 | No |
| 13942 | HMDB0045121                      | TG(18:0/18:3(6Z,9Z,12Z)/18:4(6Z,9Z,12Z,15Z))    | C57H96O6    | 875.7107486 | No |
| 13942 | HMDB0045310                      | TG(18:0/18:3(9Z,12Z,15Z)/18:4(6Z,9Z,12Z,15Z))   | C57H96O6    | 875.7107486 | No |
| 13942 | HMDB0045329                      | TG(18:0/18:4(6Z,9Z,12Z,15Z)/18:3(6Z,9Z,12Z))    | C57H96O6    | 875.7107486 | No |
| 13942 | HMDB0045336                      | TG(18:0/18:4(6Z,9Z,12Z,15Z)/18:3(9Z,12Z,15Z))   | C57H96O6    | 875.7107486 | No |
| 13942 | HMDB0045428                      | TG(18:0/22:6(4Z,7Z,10Z,13Z,16Z,19Z)/14:1(9Z))   | C57H96O6    | 875.7107486 | No |
| 13942 | HMDB0047814                      | TG(14:1(9Z)/18:0/22:6(4Z,7Z,10Z,13Z,16Z,19Z))   | C57H96O6    | 875.7107486 | No |
| 13942 | HMDB0047946                      | TG(14:1(9Z)/18:1(11Z)/22:5(4Z,7Z,10Z,13Z,16Z))  | C57H96O6    | 875.7107486 | No |
| 13942 | HMDB0047951                      | TG(14:1(9Z)/18:1(11Z)/22:5(7Z,10Z,13Z,16Z,19Z)) | C57H96O6    | 875.7107486 | No |
| 13942 | HMDB0047969                      | TG(14:1(9Z)/18:1(9Z)/22:5(4Z,7Z,10Z,13Z,16Z))   | C57H96O6    | 875.7107486 | No |
| 13942 | HMDB0047974                      | TG(14:1(9Z)/18:1(9Z)/22:5(7Z,10Z,13Z,16Z,19Z))  | C57H96O6    | 875.7107486 | No |

|       |             |                                                 |          |             |    |
|-------|-------------|-------------------------------------------------|----------|-------------|----|
| 13942 | HMDB0047996 | TG(14:1(9Z)/20:1(11Z)/20:5(5Z,8Z,11Z,14Z,17Z))  | C57H96O6 | 875.7107486 | No |
| 13942 | HMDB0048005 | TG(14:1(9Z)/20:3(5Z,8Z,11Z)/20:3(5Z,8Z,11Z))    | C57H96O6 | 875.7107486 | No |
| 13942 | HMDB0048011 | TG(14:1(9Z)/20:3(5Z,8Z,11Z)/20:3n6)             | C57H96O6 | 875.7107486 | No |
| 13942 | HMDB0048083 | TG(14:1(9Z)/18:2(9Z,12Z)/22:4(7Z,10Z,13Z,16Z))  | C57H96O6 | 875.7107486 | No |
| 13942 | HMDB0048127 | TG(14:1(9Z)/20:2n6/20:4(5Z,8Z,11Z,14Z))         | C57H96O6 | 875.7107486 | No |
| 13942 | HMDB0048133 | TG(14:1(9Z)/20:2n6/20:4(8Z,11Z,14Z,17Z))        | C57H96O6 | 875.7107486 | No |
| 13942 | HMDB0048143 | TG(14:1(9Z)/20:3n6/20:3(5Z,8Z,11Z))             | C57H96O6 | 875.7107486 | No |
| 13942 | HMDB0048149 | TG(14:1(9Z)/20:3n6/20:3n6)                      | C57H96O6 | 875.7107486 | No |
| 13942 | HMDB0048171 | TG(14:1(9Z)/20:4(5Z,8Z,11Z,14Z)/20:2n6)         | C57H96O6 | 875.7107486 | No |
| 13942 | HMDB0048201 | TG(14:1(9Z)/22:2(13Z,16Z)/18:4(6Z,9Z,12Z,15Z))  | C57H96O6 | 875.7107486 | No |
| 13942 | HMDB0048215 | TG(14:1(9Z)/22:4(7Z,10Z,13Z,16Z)/18:2(9Z,12Z))  | C57H96O6 | 875.7107486 | No |
| 13942 | HMDB0048232 | TG(14:1(9Z)/22:5(4Z,7Z,10Z,13Z,16Z)/18:1(11Z))  | C57H96O6 | 875.7107486 | No |
| 13942 | HMDB0048233 | TG(14:1(9Z)/22:5(4Z,7Z,10Z,13Z,16Z)/18:1(9Z))   | C57H96O6 | 875.7107486 | No |
| 13942 | HMDB0048289 | TG(14:1(9Z)/18:4(6Z,9Z,12Z,15Z)/22:2(13Z,16Z))  | C57H96O6 | 875.7107486 | No |
| 13942 | HMDB0048309 | TG(14:1(9Z)/20:4(8Z,11Z,14Z,17Z)/20:2n6)        | C57H96O6 | 875.7107486 | No |
| 13942 | HMDB0048326 | TG(14:1(9Z)/20:5(5Z,8Z,11Z,14Z,17Z)/20:1(11Z))  | C57H96O6 | 875.7107486 | No |
| 13942 | HMDB0048347 | TG(14:1(9Z)/22:5(7Z,10Z,13Z,16Z,19Z)/18:1(11Z)) | C57H96O6 | 875.7107486 | No |
| 13942 | HMDB0048348 | TG(14:1(9Z)/22:5(7Z,10Z,13Z,16Z,19Z)/18:1(9Z))  | C57H96O6 | 875.7107486 | No |
| 13942 | HMDB0048477 | TG(16:1(9Z)/16:0/22:6(4Z,7Z,10Z,13Z,16Z,19Z))   | C57H96O6 | 875.7107486 | No |
| 13942 | HMDB0048603 | TG(16:1(9Z)/16:1(9Z)/22:5(4Z,7Z,10Z,13Z,16Z))   | C57H96O6 | 875.7107486 | No |
| 13942 | HMDB0048608 | TG(16:1(9Z)/16:1(9Z)/22:5(7Z,10Z,13Z,16Z,19Z))  | C57H96O6 | 875.7107486 | No |
| 13942 | HMDB0048629 | TG(16:1(9Z)/18:1(11Z)/20:5(5Z,8Z,11Z,14Z,17Z))  | C57H96O6 | 875.7107486 | No |
| 13942 | HMDB0048651 | TG(16:1(9Z)/18:1(9Z)/20:5(5Z,8Z,11Z,14Z,17Z))   | C57H96O6 | 875.7107486 | No |
| 13942 | HMDB0048685 | TG(16:1(9Z)/20:3(5Z,8Z,11Z)/18:3(6Z,9Z,12Z))    | C57H96O6 | 875.7107486 | No |
| 13942 | HMDB0048692 | TG(16:1(9Z)/20:3(5Z,8Z,11Z)/18:3(9Z,12Z,15Z))   | C57H96O6 | 875.7107486 | No |
| 13942 | HMDB0048760 | TG(16:1(9Z)/18:2(9Z,12Z)/20:4(8Z,11Z,14Z,17Z))  | C57H96O6 | 875.7107486 | No |
| 13942 | HMDB0048769 | TG(16:1(9Z)/18:3(6Z,9Z,12Z)/20:3(5Z,8Z,11Z))    | C57H96O6 | 875.7107486 | No |
| 13942 | HMDB0048775 | TG(16:1(9Z)/18:3(6Z,9Z,12Z)/20:3n6)             | C57H96O6 | 875.7107486 | No |
| 13942 | HMDB0048803 | TG(16:1(9Z)/20:2n6/18:4(6Z,9Z,12Z,15Z))         | C57H96O6 | 875.7107486 | No |
| 13942 | HMDB0048817 | TG(16:1(9Z)/20:3n6/18:3(6Z,9Z,12Z))             | C57H96O6 | 875.7107486 | No |
| 13942 | HMDB0048824 | TG(16:1(9Z)/20:3n6/18:3(9Z,12Z,15Z))            | C57H96O6 | 875.7107486 | No |
| 13942 | HMDB0048838 | TG(16:1(9Z)/20:4(5Z,8Z,11Z,14Z)/18:2(9Z,12Z))   | C57H96O6 | 875.7107486 | No |
| 13942 | HMDB0048897 | TG(16:1(9Z)/22:5(4Z,7Z,10Z,13Z,16Z)/16:1(9Z))   | C57H96O6 | 875.7107486 | No |
| 13942 | HMDB0048923 | TG(16:1(9Z)/18:3(9Z,12Z,15Z)/20:3(5Z,8Z,11Z))   | C57H96O6 | 875.7107486 | No |
| 13942 | HMDB0048929 | TG(16:1(9Z)/18:3(9Z,12Z,15Z)/20:3n6)            | C57H96O6 | 875.7107486 | No |
| 13942 | HMDB0048950 | TG(16:1(9Z)/18:4(6Z,9Z,12Z,15Z)/20:2n6)         | C57H96O6 | 875.7107486 | No |
| 13942 | HMDB0048970 | TG(16:1(9Z)/20:4(8Z,11Z,14Z,17Z)/18:2(9Z,12Z))  | C57H96O6 | 875.7107486 | No |
| 13942 | HMDB0048986 | TG(16:1(9Z)/20:5(5Z,8Z,11Z,14Z,17Z)/18:1(11Z))  | C57H96O6 | 875.7107486 | No |
| 13942 | HMDB0048987 | TG(16:1(9Z)/20:5(5Z,8Z,11Z,14Z,17Z)/18:1(9Z))   | C57H96O6 | 875.7107486 | No |
| 13942 | HMDB0049007 | TG(16:1(9Z)/22:5(7Z,10Z,13Z,16Z,19Z)/16:1(9Z))  | C57H96O6 | 875.7107486 | No |
| 13942 | HMDB0049091 | TG(18:1(11Z)/14:0/22:6(4Z,7Z,10Z,13Z,16Z,19Z))  | C57H96O6 | 875.7107486 | No |
| 13942 | HMDB0049232 | TG(18:1(11Z)/14:1(9Z)/22:5(4Z,7Z,10Z,13Z,16Z))  | C57H96O6 | 875.7107486 | No |
| 13942 | HMDB0049237 | TG(18:1(11Z)/14:1(9Z)/22:5(7Z,10Z,13Z,16Z,19Z)) | C57H96O6 | 875.7107486 | No |
| 13942 | HMDB0049257 | TG(18:1(11Z)/16:1(9Z)/20:5(5Z,8Z,11Z,14Z,17Z))  | C57H96O6 | 875.7107486 | No |
| 13942 | HMDB0049402 | TG(18:1(11Z)/18:2(9Z,12Z)/18:4(6Z,9Z,12Z,15Z))  | C57H96O6 | 875.7107486 | No |
| 13942 | HMDB0049415 | TG(18:1(11Z)/18:3(6Z,9Z,12Z)/18:3(6Z,9Z,12Z))   | C57H96O6 | 875.7107486 | No |
| 13942 | HMDB0049422 | TG(18:1(11Z)/18:3(6Z,9Z,12Z)/18:3(9Z,12Z,15Z))  | C57H96O6 | 875.7107486 | No |
| 13942 | HMDB0049562 | TG(18:1(11Z)/18:3(9Z,12Z,15Z)/18:3(6Z,9Z,12Z))  | C57H96O6 | 875.7107486 | No |
| 13942 | HMDB0049569 | TG(18:1(11Z)/18:3(9Z,12Z,15Z)/18:3(9Z,12Z,15Z)) | C57H96O6 | 875.7107486 | No |
| 13942 | HMDB0049582 | TG(18:1(11Z)/18:4(6Z,9Z,12Z,15Z)/18:2(9Z,12Z))  | C57H96O6 | 875.7107486 | No |
| 13942 | HMDB0049719 | TG(18:1(9Z)/14:0/22:6(4Z,7Z,10Z,13Z,16Z,19Z))   | C57H96O6 | 875.7107486 | No |
| 13942 | HMDB0049853 | TG(18:1(9Z)/14:1(9Z)/22:5(4Z,7Z,10Z,13Z,16Z))   | C57H96O6 | 875.7107486 | No |
| 13942 | HMDB0049858 | TG(18:1(9Z)/14:1(9Z)/22:5(7Z,10Z,13Z,16Z,19Z))  | C57H96O6 | 875.7107486 | No |
| 13942 | HMDB0049877 | TG(18:1(9Z)/16:1(9Z)/20:5(5Z,8Z,11Z,14Z,17Z))   | C57H96O6 | 875.7107486 | No |
| 13942 | HMDB0050015 | TG(18:1(9Z)/18:2(9Z,12Z)/18:4(6Z,9Z,12Z,15Z))   | C57H96O6 | 875.7107486 | No |
| 13942 | HMDB0050027 | TG(18:1(9Z)/18:3(6Z,9Z,12Z)/18:3(6Z,9Z,12Z))    | C57H96O6 | 875.7107486 | No |
| 13942 | HMDB0050034 | TG(18:1(9Z)/18:3(6Z,9Z,12Z)/18:3(9Z,12Z,15Z))   | C57H96O6 | 875.7107486 | No |
| 13942 | HMDB0050167 | TG(18:1(9Z)/18:3(9Z,12Z,15Z)/18:3(6Z,9Z,12Z))   | C57H96O6 | 875.7107486 | No |
| 13942 | HMDB0050174 | TG(18:1(9Z)/18:3(9Z,12Z,15Z)/18:3(9Z,12Z,15Z))  | C57H96O6 | 875.7107486 | No |
| 13942 | HMDB0050186 | TG(18:1(9Z)/18:4(6Z,9Z,12Z,15Z)/18:2(9Z,12Z))   | C57H96O6 | 875.7107486 | No |
| 13942 | HMDB0050448 | TG(20:1(11Z)/14:1(9Z)/20:5(5Z,8Z,11Z,14Z,17Z))  | C57H96O6 | 875.7107486 | No |

|       |                     |                                                          |            |             |    |
|-------|---------------------|----------------------------------------------------------|------------|-------------|----|
| 13942 | HMDB0050876         | TG(20:3(5Z,8Z,11Z)/14:0/20:4(5Z,8Z,11Z,14Z))             | C57H96O6   | 875.7107486 | No |
| 13942 | HMDB0050882         | TG(20:3(5Z,8Z,11Z)/14:0/20:4(8Z,11Z,14Z,17Z))            | C57H96O6   | 875.7107486 | No |
| 13942 | HMDB0050917         | TG(20:3(5Z,8Z,11Z)/16:0/18:4(6Z,9Z,12Z,15Z))             | C57H96O6   | 875.7107486 | No |
| 13942 | HMDB0050995         | TG(20:3(5Z,8Z,11Z)/14:1(9Z)/20:3(5Z,8Z,11Z))             | C57H96O6   | 875.7107486 | No |
| 13942 | HMDB0051001         | TG(20:3(5Z,8Z,11Z)/14:1(9Z)/20:3n6)                      | C57H96O6   | 875.7107486 | No |
| 13942 | HMDB0051017         | TG(20:3(5Z,8Z,11Z)/16:1(9Z)/18:3(6Z,9Z,12Z))             | C57H96O6   | 875.7107486 | No |
| 13942 | HMDB0051024         | TG(20:3(5Z,8Z,11Z)/16:1(9Z)/18:3(9Z,12Z,15Z))            | C57H96O6   | 875.7107486 | No |
| 13942 | HMDB0052403         | TG(18:2(9Z,12Z)/14:0/22:5(4Z,7Z,10Z,13Z,16Z))            | C57H96O6   | 875.7107486 | No |
| 13942 | HMDB0052408         | TG(18:2(9Z,12Z)/14:0/22:5(7Z,10Z,13Z,16Z,19Z))           | C57H96O6   | 875.7107486 | No |
| 13942 | HMDB0052507         | TG(18:2(9Z,12Z)/14:1(9Z)/22:4(7Z,10Z,13Z,16Z))           | C57H96O6   | 875.7107486 | No |
| 13942 | HMDB0052520         | TG(18:2(9Z,12Z)/16:1(9Z)/20:4(5Z,8Z,11Z,14Z))            | C57H96O6   | 875.7107486 | No |
| 13942 | HMDB0052526         | TG(18:2(9Z,12Z)/16:1(9Z)/20:4(8Z,11Z,14Z,17Z))           | C57H96O6   | 875.7107486 | No |
| 13942 | HMDB0052540         | TG(18:2(9Z,12Z)/18:1(11Z)/18:4(6Z,9Z,12Z,15Z))           | C57H96O6   | 875.7107486 | No |
| 13942 | HMDB0052555         | TG(18:2(9Z,12Z)/18:1(9Z)/18:4(6Z,9Z,12Z,15Z))            | C57H96O6   | 875.7107486 | No |
| 13942 | HMDB0052636         | TG(18:2(9Z,12Z)/18:3(6Z,9Z,12Z)/18:2(9Z,12Z))            | C57H96O6   | 875.7107486 | No |
| 13942 | HMDB0052741         | TG(18:2(9Z,12Z)/18:3(9Z,12Z,15Z)/18:2(9Z,12Z))           | C57H96O6   | 875.7107486 | No |
| 13942 | HMDB0052850         | TG(18:3(6Z,9Z,12Z)/14:0/22:4(7Z,10Z,13Z,16Z))            | C57H96O6   | 875.7107486 | No |
| 13942 | HMDB0052876         | TG(18:3(6Z,9Z,12Z)/16:0/20:4(5Z,8Z,11Z,14Z))             | C57H96O6   | 875.7107486 | No |
| 13942 | HMDB0052882         | TG(18:3(6Z,9Z,12Z)/16:0/20:4(8Z,11Z,14Z,17Z))            | C57H96O6   | 875.7107486 | No |
| 13942 | HMDB0052895         | TG(18:3(6Z,9Z,12Z)/18:0/18:4(6Z,9Z,12Z,15Z))             | C57H96O6   | 875.7107486 | No |
| 13942 | HMDB0052959         | TG(18:3(6Z,9Z,12Z)/16:1(9Z)/20:3n6)                      | C57H96O6   | 875.7107486 | No |
| 13942 | HMDB0052971         | TG(18:3(6Z,9Z,12Z)/18:1(11Z)/18:3(6Z,9Z,12Z))            | C57H96O6   | 875.7107486 | No |
| 13942 | HMDB0052978         | TG(18:3(6Z,9Z,12Z)/18:1(11Z)/18:3(9Z,12Z,15Z))           | C57H96O6   | 875.7107486 | No |
| 13942 | HMDB0052985         | TG(18:3(6Z,9Z,12Z)/18:1(9Z)/18:3(6Z,9Z,12Z))             | C57H96O6   | 875.7107486 | No |
| 13942 | HMDB0052992         | TG(18:3(6Z,9Z,12Z)/18:1(9Z)/18:3(9Z,12Z,15Z))            | C57H96O6   | 875.7107486 | No |
| 13942 | HMDB0053273         | TG(20:2n6/14:0/20:5(5Z,8Z,11Z,14Z,17Z))                  | C57H96O6   | 875.7107486 | No |
| 13942 | HMDB0053357         | TG(20:2n6/14:1(9Z)/20:4(5Z,8Z,11Z,14Z))                  | C57H96O6   | 875.7107486 | No |
| 13942 | HMDB0053363         | TG(20:2n6/14:1(9Z)/20:4(8Z,11Z,14Z,17Z))                 | C57H96O6   | 875.7107486 | No |
| 13942 | HMDB0053375         | TG(20:2n6/16:1(9Z)/18:4(6Z,9Z,12Z,15Z))                  | C57H96O6   | 875.7107486 | No |
| 13942 | HMDB0053654         | TG(20:3n6/14:0/20:4(5Z,8Z,11Z,14Z))                      | C57H96O6   | 875.7107486 | No |
| 13942 | HMDB0053660         | TG(20:3n6/14:0/20:4(8Z,11Z,14Z,17Z))                     | C57H96O6   | 875.7107486 | No |
| 13942 | HMDB0053683         | TG(20:3n6/16:0/18:4(6Z,9Z,12Z,15Z))                      | C57H96O6   | 875.7107486 | No |
| 13942 | HMDB0053737         | TG(20:3n6/14:1(9Z)/20:3n6)                               | C57H96O6   | 875.7107486 | No |
| 13942 | HMDB0053754         | TG(20:3n6/16:1(9Z)/18:3(9Z,12Z,15Z))                     | C57H96O6   | 875.7107486 | No |
| 13942 | HMDB0054415         | TG(22:2(13Z,16Z)/14:1(9Z)/18:4(6Z,9Z,12Z,15Z))           | C57H96O6   | 875.7107486 | No |
| 13942 | HMDB0054642         | TG(22:4(7Z,10Z,13Z,16Z)/14:0/18:3(9Z,12Z,15Z))           | C57H96O6   | 875.7107486 | No |
| 13942 | HMDB0055164         | TG(18:3(9Z,12Z,15Z)/16:0/20:4(8Z,11Z,14Z,17Z))           | C57H96O6   | 875.7107486 | No |
| 13942 | HMDB0055170         | TG(18:3(9Z,12Z,15Z)/18:0/18:4(6Z,9Z,12Z,15Z))            | C57H96O6   | 875.7107486 | No |
| 14042 | HMDB0009793; C00626 | PI(16:0/22:4(10Z,13Z,16Z,19Z))                           | C47H83O13P | 885.5472326 | No |
| 14042 | HMDB0009794; C00626 | PI(16:0/22:4(7Z,10Z,13Z,16Z))                            | C47H83O13P | 885.5472326 | No |
| 14042 | HMDB0009815; C00626 | PI(18:0/20:4(5Z,8Z,11Z,14Z))                             | C47H83O13P | 885.5472326 | No |
| 14042 | HMDB0009816; C00626 | PI(18:0/20:4(8Z,11Z,14Z,17Z))                            | C47H83O13P | 885.5472326 | No |
| 14042 | HMDB0009830; C00626 | PI(18:1(11Z)/20:3(5Z,8Z,11Z))                            | C47H83O13P | 885.5472326 | No |
| 14042 | HMDB0009831; C00626 | PI(18:1(11Z)/20:3(8Z,11Z,14Z))                           | C47H83O13P | 885.5472326 | No |
| 14042 | HMDB0009842; C00626 | PI(18:1(9Z)/20:3(5Z,8Z,11Z))                             | C47H83O13P | 885.5472326 | No |
| 14042 | HMDB0009843; C00626 | PI(18:1(9Z)/20:3(8Z,11Z,14Z))                            | C47H83O13P | 885.5472326 | No |
| 14042 | HMDB0009853; C00626 | PI(18:2(9Z,12Z)/20:2(11Z,14Z))                           | C47H83O13P | 885.5472326 | No |
| 14042 | HMDB0009877; C00626 | PI(20:2(11Z,14Z)/18:2(9Z,12Z))                           | C47H83O13P | 885.5472326 | No |
| 14042 | HMDB0009881; C00626 | PI(20:3(5Z,8Z,11Z)/18:1(11Z))                            | C47H83O13P | 885.5472326 | No |
| 14042 | HMDB0009882; C00626 | PI(20:3(5Z,8Z,11Z)/18:1(9Z))                             | C47H83O13P | 885.5472326 | No |
| 14042 | HMDB0009888; C00626 | PI(20:3(8Z,11Z,14Z)/18:1(11Z))                           | C47H83O13P | 885.5472326 | No |
| 14042 | HMDB0009889; C00626 | PI(20:3(8Z,11Z,14Z)/18:1(9Z))                            | C47H83O13P | 885.5472326 | No |
| 14042 | HMDB0009894; C00626 | PI(20:4(5Z,8Z,11Z,14Z)/18:0)                             | C47H83O13P | 885.5472326 | No |
| 14042 | HMDB0009900; C00626 | PI(20:4(8Z,11Z,14Z,17Z)/18:0)                            | C47H83O13P | 885.5472326 | No |
| 14042 | HMDB0009912; C00626 | PI(22:4(10Z,13Z,16Z,19Z)/16:0)                           | C47H83O13P | 885.5472326 | No |
| 14042 | HMDB0009914; C00626 | PI(22:4(7Z,10Z,13Z,16Z)/16:0)                            | C47H83O13P | 885.5472326 | No |
| 14045 | HMDB0041479         | Trtriacontyl octacosanoate                               | C61H122O2  | 885.9368597 | No |
| 14066 | HMDB0043365         | TG(15:0/22:1(13Z)/o-18:0)                                | C58H112O5  | 887.8411858 | No |
| 14066 | HMDB0043813         | TG(15:0/o-18:0/22:1(13Z))                                | C58H112O5  | 887.8411858 | No |
| 14066 | HMDB0051441         | TG(22:1(13Z)/15:0/o-18:0)                                | C58H112O5  | 887.8411858 | No |
| 14148 | HMDB0042869         | TG(14:0/20:5(5Z,8Z,11Z,14Z,17Z)/22:6(4Z,7Z,10Z,13Z,16Z)) | C59H92O6   | 895.6847073 | No |

|       |             |                                                                              |             |    |
|-------|-------------|------------------------------------------------------------------------------|-------------|----|
| 14148 | HMDB0042927 | TG(14:0/22:6(4Z,7Z,10Z,13Z,16Z,19Z)/20:5(5Z,8Z,11Z,14Z,17Z,20Z) C59H92O6     | 895.6847073 | No |
| 14148 | HMDB0048182 | TG(14:1(9Z)/20:4(5Z,8Z,11Z,14Z)/22:6(4Z,7Z,10Z,13Z,16Z,19Z) C59H92O6         | 895.6847073 | No |
| 14148 | HMDB0048249 | TG(14:1(9Z)/22:5(4Z,7Z,10Z,13Z,16Z)/20:5(5Z,8Z,11Z,14Z,17Z,20Z) C59H92O6     | 895.6847073 | No |
| 14148 | HMDB0048320 | TG(14:1(9Z)/20:4(8Z,11Z,14Z,17Z)/22:6(4Z,7Z,10Z,13Z,16Z,19Z) C59H92O6        | 895.6847073 | No |
| 14148 | HMDB0048337 | TG(14:1(9Z)/20:5(5Z,8Z,11Z,14Z,17Z)/22:5(4Z,7Z,10Z,13Z,16Z,19Z) C59H92O6     | 895.6847073 | No |
| 14148 | HMDB0048342 | TG(14:1(9Z)/20:5(5Z,8Z,11Z,14Z,17Z)/22:5(7Z,10Z,13Z,16Z,19Z) C59H92O6        | 895.6847073 | No |
| 14148 | HMDB0048364 | TG(14:1(9Z)/22:5(7Z,10Z,13Z,16Z,19Z)/20:5(5Z,8Z,11Z,14Z,17Z,20Z) C59H92O6    | 895.6847073 | No |
| 14148 | HMDB0048380 | TG(14:1(9Z)/22:6(4Z,7Z,10Z,13Z,16Z,19Z)/20:4(5Z,8Z,11Z,14Z,17Z,20Z) C59H92O6 | 895.6847073 | No |
| 14148 | HMDB0048386 | TG(14:1(9Z)/22:6(4Z,7Z,10Z,13Z,16Z,19Z)/20:4(8Z,11Z,14Z,17Z,20Z) C59H92O6    | 895.6847073 | No |
| 14148 | HMDB0048961 | TG(16:1(9Z)/18:4(6Z,9Z,12Z,15Z)/22:6(4Z,7Z,10Z,13Z,16Z,19Z) C59H92O6         | 895.6847073 | No |
| 14148 | HMDB0049003 | TG(16:1(9Z)/20:5(5Z,8Z,11Z,14Z,17Z)/20:5(5Z,8Z,11Z,14Z,17Z,20Z) C59H92O6     | 895.6847073 | No |
| 14148 | HMDB0049045 | TG(16:1(9Z)/22:6(4Z,7Z,10Z,13Z,16Z,19Z)/18:4(6Z,9Z,12Z,15Z) C59H92O6         | 895.6847073 | No |
| 14148 | HMDB0051313 | TG(20:3(5Z,8Z,11Z)/18:4(6Z,9Z,12Z,15Z)/18:4(6Z,9Z,12Z,15Z) C59H92O6          | 895.6847073 | No |
| 14148 | HMDB0052767 | TG(18:2(9Z,12Z)/18:4(6Z,9Z,12Z,15Z)/20:5(5Z,8Z,11Z,14Z,17Z,20Z) C59H92O6     | 895.6847073 | No |
| 14148 | HMDB0052795 | TG(18:2(9Z,12Z)/20:5(5Z,8Z,11Z,14Z,17Z)/18:4(6Z,9Z,12Z,15Z) C59H92O6         | 895.6847073 | No |
| 14148 | HMDB0053079 | TG(18:3(6Z,9Z,12Z)/18:3(6Z,9Z,12Z)/20:5(5Z,8Z,11Z,14Z,17Z,20Z) C59H92O6      | 895.6847073 | No |
| 14148 | HMDB0053119 | TG(18:3(6Z,9Z,12Z)/20:4(5Z,8Z,11Z,14Z)/18:4(6Z,9Z,12Z,15Z) C59H92O6          | 895.6847073 | No |
| 14148 | HMDB0053177 | TG(18:3(6Z,9Z,12Z)/18:3(9Z,12Z,15Z)/20:5(5Z,8Z,11Z,14Z,17Z,20Z) C59H92O6     | 895.6847073 | No |
| 14148 | HMDB0053184 | TG(18:3(6Z,9Z,12Z)/18:4(6Z,9Z,12Z,15Z)/20:4(5Z,8Z,11Z,14Z,17Z,20Z) C59H92O6  | 895.6847073 | No |
| 14148 | HMDB0053190 | TG(18:3(6Z,9Z,12Z)/18:4(6Z,9Z,12Z,15Z)/20:4(8Z,11Z,14Z,17Z,20Z) C59H92O6     | 895.6847073 | No |
| 14148 | HMDB0053203 | TG(18:3(6Z,9Z,12Z)/20:4(8Z,11Z,14Z,17Z)/18:4(6Z,9Z,12Z,15Z) C59H92O6         | 895.6847073 | No |
| 14148 | HMDB0053209 | TG(18:3(6Z,9Z,12Z)/20:5(5Z,8Z,11Z,14Z,17Z)/18:3(6Z,9Z,12Z,15Z) C59H92O6      | 895.6847073 | No |
| 14148 | HMDB0053216 | TG(18:3(6Z,9Z,12Z)/20:5(5Z,8Z,11Z,14Z,17Z)/18:3(9Z,12Z,15Z) C59H92O6         | 895.6847073 | No |
| 14148 | HMDB0053947 | TG(20:3n6/18:4(6Z,9Z,12Z,15Z)/18:4(6Z,9Z,12Z,15Z) C59H92O6                   | 895.6847073 | No |
| 14148 | HMDB0054098 | TG(20:4(5Z,8Z,11Z,14Z)/14:1(9Z)/22:6(4Z,7Z,10Z,13Z,16Z,19Z) C59H92O6         | 895.6847073 | No |
| 14148 | HMDB0054193 | TG(20:4(5Z,8Z,11Z,14Z)/18:3(6Z,9Z,12Z)/18:4(6Z,9Z,12Z,15Z) C59H92O6          | 895.6847073 | No |
| 14148 | HMDB0054270 | TG(20:4(5Z,8Z,11Z,14Z)/18:3(9Z,12Z,15Z)/18:4(6Z,9Z,12Z,15Z) C59H92O6         | 895.6847073 | No |
| 14148 | HMDB0054280 | TG(20:4(5Z,8Z,11Z,14Z)/18:4(6Z,9Z,12Z,15Z)/18:3(9Z,12Z,15Z) C59H92O6         | 895.6847073 | No |
| 14148 | HMDB0054969 | TG(22:5(4Z,7Z,10Z,13Z,16Z)/14:1(9Z)/20:5(5Z,8Z,11Z,14Z,17Z,20Z) C59H92O6     | 895.6847073 | No |
| 14148 | HMDB0055263 | TG(18:3(9Z,12Z,15Z)/18:3(6Z,9Z,12Z)/20:5(5Z,8Z,11Z,14Z,17Z,20Z) C59H92O6     | 895.6847073 | No |
| 14148 | HMDB0055282 | TG(18:3(9Z,12Z,15Z)/20:4(5Z,8Z,11Z,14Z)/18:4(6Z,9Z,12Z,15Z) C59H92O6         | 895.6847073 | No |
| 14148 | HMDB0055312 | TG(18:3(9Z,12Z,15Z)/18:3(9Z,12Z,15Z)/20:5(5Z,8Z,11Z,14Z,17Z,20Z) C59H92O6    | 895.6847073 | No |
| 14148 | HMDB0055318 | TG(18:3(9Z,12Z,15Z)/18:4(6Z,9Z,12Z,15Z)/20:4(8Z,11Z,14Z,17Z,20Z) C59H92O6    | 895.6847073 | No |
| 14148 | HMDB0055324 | TG(18:3(9Z,12Z,15Z)/20:4(8Z,11Z,14Z,17Z)/18:4(6Z,9Z,12Z,15Z) C59H92O6        | 895.6847073 | No |
| 14148 | HMDB0055330 | TG(18:3(9Z,12Z,15Z)/20:5(5Z,8Z,11Z,14Z,17Z)/18:3(9Z,12Z,15Z) C59H92O6        | 895.6847073 | No |
| 14148 | HMDB0055409 | TG(18:4(6Z,9Z,12Z,15Z)/16:1(9Z)/22:6(4Z,7Z,10Z,13Z,16Z,19Z) C59H92O6         | 895.6847073 | No |
| 14148 | HMDB0055429 | TG(18:4(6Z,9Z,12Z,15Z)/20:3(5Z,8Z,11Z)/18:4(6Z,9Z,12Z,15Z) C59H92O6          | 895.6847073 | No |
| 14148 | HMDB0055449 | TG(18:4(6Z,9Z,12Z,15Z)/18:2(9Z,12Z)/20:5(5Z,8Z,11Z,14Z,17Z,20Z) C59H92O6     | 895.6847073 | No |
| 14148 | HMDB0055454 | TG(18:4(6Z,9Z,12Z,15Z)/18:3(6Z,9Z,12Z)/20:4(8Z,11Z,14Z,17Z,20Z) C59H92O6     | 895.6847073 | No |
| 14148 | HMDB0055465 | TG(18:4(6Z,9Z,12Z,15Z)/20:3n6/18:4(6Z,9Z,12Z,15Z) C59H92O6                   | 895.6847073 | No |
| 14148 | HMDB0055496 | TG(18:4(6Z,9Z,12Z,15Z)/18:3(9Z,12Z,15Z)/20:4(8Z,11Z,14Z,17Z,20Z) C59H92O6    | 895.6847073 | No |
| 14148 | HMDB0055574 | TG(20:4(8Z,11Z,14Z,17Z)/14:1(9Z)/22:6(4Z,7Z,10Z,13Z,16Z,19Z) C59H92O6        | 895.6847073 | No |
| 14148 | HMDB0055687 | TG(20:5(5Z,8Z,11Z,14Z,17Z)/14:0/22:6(4Z,7Z,10Z,13Z,16Z,19Z) C59H92O6         | 895.6847073 | No |
| 14148 | HMDB0055714 | TG(20:5(5Z,8Z,11Z,14Z,17Z)/14:1(9Z)/22:5(7Z,10Z,13Z,16Z,19Z) C59H92O6        | 895.6847073 | No |
| 14148 | HMDB0055717 | TG(20:5(5Z,8Z,11Z,14Z,17Z)/16:1(9Z)/20:5(5Z,8Z,11Z,14Z,17Z,20Z) C59H92O6     | 895.6847073 | No |
| 14165 | HMDB0013561 | PGP(18:2(9Z,12Z)/22:6(4Z,7Z,10Z,13Z,16Z,19Z)) C46H76O13P2                    | 897.4687362 | No |
| 14165 | HMDB0013574 | PGP(18:3(6Z,9Z,12Z)/22:5(4Z,7Z,10Z,13Z,16Z)) C46H76O13P2                     | 897.4687362 | No |
| 14165 | HMDB0013575 | PGP(18:3(6Z,9Z,12Z)/22:5(7Z,10Z,13Z,16Z,19Z)) C46H76O13P2                    | 897.4687362 | No |
| 14165 | HMDB0013589 | PGP(18:3(9Z,12Z,15Z)/22:5(4Z,7Z,10Z,13Z,16Z)) C46H76O13P2                    | 897.4687362 | No |
| 14165 | HMDB0013590 | PGP(18:3(9Z,12Z,15Z)/22:5(7Z,10Z,13Z,16Z,19Z)) C46H76O13P2                   | 897.4687362 | No |
| 14165 | HMDB0116464 | PGP(20:4(5Z,8Z,11Z,14Z)/20:4(5Z,8Z,11Z,14Z)) C46H76O13P2                     | 897.4687362 | No |
| 14165 | HMDB0116465 | PGP(20:4(5Z,8Z,11Z,14Z)/20:4(8Z,11Z,14Z,17Z)) C46H76O13P2                    | 897.4687362 | No |
| 14165 | HMDB0116471 | PGP(20:4(8Z,11Z,14Z,17Z)/20:4(5Z,8Z,11Z,14Z)) C46H76O13P2                    | 897.4687362 | No |
| 14165 | HMDB0116472 | PGP(20:4(8Z,11Z,14Z,17Z)/20:4(8Z,11Z,14Z,17Z)) C46H76O13P2                   | 897.4687362 | No |
| 14165 | HMDB0116475 | PGP(22:6(4Z,7Z,10Z,13Z,16Z,19Z)/18:2(9Z,12Z)) C46H76O13P2                    | 897.4687362 | No |
| 14168 | HMDB0010508 | TG(18:3(9Z,12Z,15Z)/18:2(9Z,12Z)/20:5(5Z,8Z,11Z,14Z,17Z,20Z) C59H94O6        | 897.6990899 | No |
| 14168 | HMDB0010513 | TG(18:3(9Z,12Z,15Z)/20:4(5Z,8Z,11Z,14Z)/18:3(9Z,12Z,15Z) C59H94O6            | 897.6990899 | No |
| 14168 | HMDB0042659 | TG(14:0/20:4(5Z,8Z,11Z,14Z)/22:6(4Z,7Z,10Z,13Z,16Z,19Z) C59H94O6             | 897.6990899 | No |
| 14168 | HMDB0042747 | TG(14:0/22:5(4Z,7Z,10Z,13Z,16Z)/20:5(5Z,8Z,11Z,14Z,17Z,20Z) C59H94O6         | 897.6990899 | No |
| 14168 | HMDB0042839 | TG(14:0/20:4(8Z,11Z,14Z,17Z)/22:6(4Z,7Z,10Z,13Z,16Z,19Z) C59H94O6            | 897.6990899 | No |
| 14168 | HMDB0042863 | TG(14:0/20:5(5Z,8Z,11Z,14Z,17Z)/22:5(4Z,7Z,10Z,13Z,16Z,19Z) C59H94O6         | 897.6990899 | No |

|       |             |                                                                 |             |    |
|-------|-------------|-----------------------------------------------------------------|-------------|----|
| 14168 | HMDB0042868 | TG(14:0/20:5(5Z,8Z,11Z,14Z,17Z)/22:5(7Z,10Z,13Z,16Z,C59H94O6    | 897.6990899 | No |
| 14168 | HMDB0042897 | TG(14:0/22:5(7Z,10Z,13Z,16Z,19Z)/20:5(5Z,8Z,11Z,14Z,C59H94O6    | 897.6990899 | No |
| 14168 | HMDB0042920 | TG(14:0/22:6(4Z,7Z,10Z,13Z,16Z,19Z)/20:4(5Z,8Z,11Z,14Z,C59H94O6 | 897.6990899 | No |
| 14168 | HMDB0042926 | TG(14:0/22:6(4Z,7Z,10Z,13Z,16Z,19Z)/20:4(8Z,11Z,14Z,C59H94O6    | 897.6990899 | No |
| 14168 | HMDB0044527 | TG(16:0/18:4(6Z,9Z,12Z,15Z)/22:6(4Z,7Z,10Z,13Z,16Z,19Z,C59H94O6 | 897.6990899 | No |
| 14168 | HMDB0044581 | TG(16:0/20:5(5Z,8Z,11Z,14Z,17Z)/20:5(5Z,8Z,11Z,14Z,17Z,C59H94O6 | 897.6990899 | No |
| 14168 | HMDB0044635 | TG(16:0/22:6(4Z,7Z,10Z,13Z,16Z,19Z)/18:4(6Z,9Z,12Z,15Z,C59H94O6 | 897.6990899 | No |
| 14168 | HMDB0048021 | TG(14:1(9Z)/20:3(5Z,8Z,11Z)/22:6(4Z,7Z,10Z,13Z,16Z,19Z,C59H94O6 | 897.6990899 | No |
| 14168 | HMDB0048159 | TG(14:1(9Z)/20:3n6/22:6(4Z,7Z,10Z,13Z,16Z,19Z))C59H94O6         | 897.6990899 | No |
| 14168 | HMDB0048176 | TG(14:1(9Z)/20:4(5Z,8Z,11Z,14Z)/22:5(4Z,7Z,10Z,13Z,16Z,C59H94O6 | 897.6990899 | No |
| 14168 | HMDB0048181 | TG(14:1(9Z)/20:4(5Z,8Z,11Z,14Z)/22:5(7Z,10Z,13Z,16Z,C59H94O6    | 897.6990899 | No |
| 14168 | HMDB0048226 | TG(14:1(9Z)/22:4(7Z,10Z,13Z,16Z)/20:5(5Z,8Z,11Z,14Z,C59H94O6    | 897.6990899 | No |
| 14168 | HMDB0048242 | TG(14:1(9Z)/22:5(4Z,7Z,10Z,13Z,16Z)/20:4(5Z,8Z,11Z,14Z,C59H94O6 | 897.6990899 | No |
| 14168 | HMDB0048248 | TG(14:1(9Z)/22:5(4Z,7Z,10Z,13Z,16Z)/20:4(8Z,11Z,14Z,C59H94O6    | 897.6990899 | No |
| 14168 | HMDB0048314 | TG(14:1(9Z)/20:4(8Z,11Z,14Z,17Z)/22:5(4Z,7Z,10Z,13Z,C59H94O6    | 897.6990899 | No |
| 14168 | HMDB0048319 | TG(14:1(9Z)/20:4(8Z,11Z,14Z,17Z)/22:5(7Z,10Z,13Z,16Z,C59H94O6   | 897.6990899 | No |
| 14168 | HMDB0048336 | TG(14:1(9Z)/20:5(5Z,8Z,11Z,14Z,17Z)/22:4(7Z,10Z,13Z,C59H94O6    | 897.6990899 | No |
| 14168 | HMDB0048357 | TG(14:1(9Z)/22:5(7Z,10Z,13Z,16Z,19Z)/20:4(5Z,8Z,11Z,C59H94O6    | 897.6990899 | No |
| 14168 | HMDB0048363 | TG(14:1(9Z)/22:5(7Z,10Z,13Z,16Z,19Z)/20:4(8Z,11Z,14Z,C59H94O6   | 897.6990899 | No |
| 14168 | HMDB0048373 | TG(14:1(9Z)/22:6(4Z,7Z,10Z,13Z,16Z,19Z)/20:3(5Z,8Z,11Z,C59H94O6 | 897.6990899 | No |
| 14168 | HMDB0048379 | TG(14:1(9Z)/22:6(4Z,7Z,10Z,13Z,16Z,19Z)/20:3n6C59H94O6          | 897.6990899 | No |
| 14168 | HMDB0048785 | TG(16:1(9Z)/18:3(6Z,9Z,12Z)/22:6(4Z,7Z,10Z,13Z,16Z,19Z,C59H94O6 | 897.6990899 | No |
| 14168 | HMDB0048849 | TG(16:1(9Z)/20:4(5Z,8Z,11Z,14Z)/20:5(5Z,8Z,11Z,14Z,17Z,C59H94O6 | 897.6990899 | No |
| 14168 | HMDB0048913 | TG(16:1(9Z)/22:5(4Z,7Z,10Z,13Z,16Z)/18:4(6Z,9Z,12Z,15Z,C59H94O6 | 897.6990899 | No |
| 14168 | HMDB0048939 | TG(16:1(9Z)/18:3(9Z,12Z,15Z)/22:6(4Z,7Z,10Z,13Z,16Z,C59H94O6    | 897.6990899 | No |
| 14168 | HMDB0048955 | TG(16:1(9Z)/18:4(6Z,9Z,12Z,15Z)/22:5(4Z,7Z,10Z,13Z,16Z,C59H94O6 | 897.6990899 | No |
| 14168 | HMDB0048960 | TG(16:1(9Z)/18:4(6Z,9Z,12Z,15Z)/22:5(7Z,10Z,13Z,16Z,C59H94O6    | 897.6990899 | No |
| 14168 | HMDB0048981 | TG(16:1(9Z)/20:4(8Z,11Z,14Z,17Z)/20:5(5Z,8Z,11Z,14Z,C59H94O6    | 897.6990899 | No |
| 14168 | HMDB0048996 | TG(16:1(9Z)/20:5(5Z,8Z,11Z,14Z,17Z)/20:4(5Z,8Z,11Z,14Z,C59H94O6 | 897.6990899 | No |
| 14168 | HMDB0049002 | TG(16:1(9Z)/20:5(5Z,8Z,11Z,14Z,17Z)/20:4(8Z,11Z,14Z,C59H94O6    | 897.6990899 | No |
| 14168 | HMDB0049023 | TG(16:1(9Z)/22:5(7Z,10Z,13Z,16Z,19Z)/18:4(6Z,9Z,12Z,C59H94O6    | 897.6990899 | No |
| 14168 | HMDB0049037 | TG(16:1(9Z)/22:6(4Z,7Z,10Z,13Z,16Z,19Z)/18:3(6Z,9Z,12Z,C59H94O6 | 897.6990899 | No |
| 14168 | HMDB0049044 | TG(16:1(9Z)/22:6(4Z,7Z,10Z,13Z,16Z,19Z)/18:3(9Z,12Z,C59H94O6    | 897.6990899 | No |
| 14168 | HMDB0049593 | TG(18:1(11Z)/18:4(6Z,9Z,12Z,15Z)/20:5(5Z,8Z,11Z,14Z,C59H94O6    | 897.6990899 | No |
| 14168 | HMDB0049633 | TG(18:1(11Z)/20:5(5Z,8Z,11Z,14Z,17Z)/18:4(6Z,9Z,12Z,C59H94O6    | 897.6990899 | No |
| 14168 | HMDB0050197 | TG(18:1(9Z)/18:4(6Z,9Z,12Z,15Z)/20:5(5Z,8Z,11Z,14Z,17Z,C59H94O6 | 897.6990899 | No |
| 14168 | HMDB0050235 | TG(18:1(9Z)/20:5(5Z,8Z,11Z,14Z,17Z)/18:4(6Z,9Z,12Z,15Z,C59H94O6 | 897.6990899 | No |
| 14168 | HMDB0051011 | TG(20:3(5Z,8Z,11Z)/14:1(9Z)/22:6(4Z,7Z,10Z,13Z,16Z,19Z,C59H94O6 | 897.6990899 | No |
| 14168 | HMDB0051169 | TG(20:3(5Z,8Z,11Z)/18:3(6Z,9Z,12Z)/18:4(6Z,9Z,12Z,15Z,C59H94O6  | 897.6990899 | No |
| 14168 | HMDB0051295 | TG(20:3(5Z,8Z,11Z)/18:3(9Z,12Z,15Z)/18:4(6Z,9Z,12Z,15Z,C59H94O6 | 897.6990899 | No |
| 14168 | HMDB0051305 | TG(20:3(5Z,8Z,11Z)/18:4(6Z,9Z,12Z,15Z)/18:3(6Z,9Z,12Z,C59H94O6  | 897.6990899 | No |
| 14168 | HMDB0051312 | TG(20:3(5Z,8Z,11Z)/18:4(6Z,9Z,12Z,15Z)/18:3(9Z,12Z,15Z,C59H94O6 | 897.6990899 | No |
| 14168 | HMDB0052647 | TG(18:2(9Z,12Z)/18:3(6Z,9Z,12Z)/20:5(5Z,8Z,11Z,14Z,17Z,C59H94O6 | 897.6990899 | No |
| 14168 | HMDB0052690 | TG(18:2(9Z,12Z)/20:4(5Z,8Z,11Z,14Z)/18:4(6Z,9Z,12Z,15Z,C59H94O6 | 897.6990899 | No |
| 14168 | HMDB0052752 | TG(18:2(9Z,12Z)/18:3(9Z,12Z,15Z)/20:5(5Z,8Z,11Z,14Z,C59H94O6    | 897.6990899 | No |
| 14168 | HMDB0052760 | TG(18:2(9Z,12Z)/18:4(6Z,9Z,12Z,15Z)/20:4(5Z,8Z,11Z,14Z,C59H94O6 | 897.6990899 | No |
| 14168 | HMDB0052766 | TG(18:2(9Z,12Z)/18:4(6Z,9Z,12Z,15Z)/20:4(8Z,11Z,14Z,C59H94O6    | 897.6990899 | No |
| 14168 | HMDB0052780 | TG(18:2(9Z,12Z)/20:4(8Z,11Z,14Z,17Z)/18:4(6Z,9Z,12Z,C59H94O6    | 897.6990899 | No |
| 14168 | HMDB0052787 | TG(18:2(9Z,12Z)/20:5(5Z,8Z,11Z,14Z,17Z)/18:3(6Z,9Z,12Z,C59H94O6 | 897.6990899 | No |
| 14168 | HMDB0052794 | TG(18:2(9Z,12Z)/20:5(5Z,8Z,11Z,14Z,17Z)/18:3(9Z,12Z,C59H94O6    | 897.6990899 | No |
| 14168 | HMDB0052969 | TG(18:3(6Z,9Z,12Z)/16:1(9Z)/22:6(4Z,7Z,10Z,13Z,16Z,19Z,C59H94O6 | 897.6990899 | No |
| 14168 | HMDB0053021 | TG(18:3(6Z,9Z,12Z)/20:3(5Z,8Z,11Z)/18:4(6Z,9Z,12Z,15Z,C59H94O6  | 897.6990899 | No |
| 14168 | HMDB0053065 | TG(18:3(6Z,9Z,12Z)/18:2(9Z,12Z)/20:5(5Z,8Z,11Z,14Z,17Z,C59H94O6 | 897.6990899 | No |
| 14168 | HMDB0053072 | TG(18:3(6Z,9Z,12Z)/18:3(6Z,9Z,12Z)/20:4(5Z,8Z,11Z,14Z,C59H94O6  | 897.6990899 | No |
| 14168 | HMDB0053078 | TG(18:3(6Z,9Z,12Z)/18:3(6Z,9Z,12Z)/20:4(8Z,11Z,14Z,17Z,C59H94O6 | 897.6990899 | No |
| 14168 | HMDB0053105 | TG(18:3(6Z,9Z,12Z)/20:3n6/18:4(6Z,9Z,12Z,15Z))C59H94O6          | 897.6990899 | No |
| 14168 | HMDB0053111 | TG(18:3(6Z,9Z,12Z)/20:4(5Z,8Z,11Z,14Z)/18:3(6Z,9Z,12Z,C59H94O6  | 897.6990899 | No |
| 14168 | HMDB0053118 | TG(18:3(6Z,9Z,12Z)/20:4(5Z,8Z,11Z,14Z)/18:3(9Z,12Z,15Z,C59H94O6 | 897.6990899 | No |
| 14168 | HMDB0053170 | TG(18:3(6Z,9Z,12Z)/18:3(9Z,12Z,15Z)/20:4(5Z,8Z,11Z,14Z,C59H94O6 | 897.6990899 | No |
| 14168 | HMDB0053176 | TG(18:3(6Z,9Z,12Z)/18:3(9Z,12Z,15Z)/20:4(8Z,11Z,14Z,C59H94O6    | 897.6990899 | No |
| 14168 | HMDB0053183 | TG(18:3(6Z,9Z,12Z)/18:4(6Z,9Z,12Z,15Z)/20:3n6C59H94O6           | 897.6990899 | No |

|       |             |                                                                   |             |    |
|-------|-------------|-------------------------------------------------------------------|-------------|----|
| 14168 | HMDB0053195 | TG(18:3(6Z,9Z,12Z)/20:4(8Z,11Z,14Z,17Z)/18:3(6Z,9Z,1C59H94O6      | 897.6990899 | No |
| 14168 | HMDB0053202 | TG(18:3(6Z,9Z,12Z)/20:4(8Z,11Z,14Z,17Z)/18:3(9Z,12Z C59H94O6      | 897.6990899 | No |
| 14168 | HMDB0053583 | TG(20:2n6/18:4(6Z,9Z,12Z,15Z)/18:4(6Z,9Z,12Z,15Z)) C59H94O6       | 897.6990899 | No |
| 14168 | HMDB0053747 | TG(20:3n6/14:1(9Z)/22:6(4Z,7Z,10Z,13Z,16Z,19Z)) C59H94O6          | 897.6990899 | No |
| 14168 | HMDB0053851 | TG(20:3n6/18:3(6Z,9Z,12Z)/18:4(6Z,9Z,12Z,15Z)) C59H94O6           | 897.6990899 | No |
| 14168 | HMDB0053935 | TG(20:3n6/18:3(9Z,12Z,15Z)/18:4(6Z,9Z,12Z,15Z)) C59H94O6          | 897.6990899 | No |
| 14168 | HMDB0053946 | TG(20:3n6/18:4(6Z,9Z,12Z,15Z)/18:3(9Z,12Z,15Z)) C59H94O6          | 897.6990899 | No |
| 14168 | HMDB0054021 | TG(20:4(5Z,8Z,11Z,14Z)/14:0/22:6(4Z,7Z,10Z,13Z,16Z, C59H94O6      | 897.6990899 | No |
| 14168 | HMDB0054092 | TG(20:4(5Z,8Z,11Z,14Z)/14:1(9Z)/22:5(4Z,7Z,10Z,13Z,1C59H94O6      | 897.6990899 | No |
| 14168 | HMDB0054097 | TG(20:4(5Z,8Z,11Z,14Z)/14:1(9Z)/22:5(7Z,10Z,13Z,16Z C59H94O6      | 897.6990899 | No |
| 14168 | HMDB0054107 | TG(20:4(5Z,8Z,11Z,14Z)/16:1(9Z)/20:5(5Z,8Z,11Z,14Z,1C59H94O6      | 897.6990899 | No |
| 14168 | HMDB0054182 | TG(20:4(5Z,8Z,11Z,14Z)/18:2(9Z,12Z)/18:4(6Z,9Z,12Z,1C59H94O6      | 897.6990899 | No |
| 14168 | HMDB0054192 | TG(20:4(5Z,8Z,11Z,14Z)/18:3(6Z,9Z,12Z)/18:3(9Z,12Z,1C59H94O6      | 897.6990899 | No |
| 14168 | HMDB0054269 | TG(20:4(5Z,8Z,11Z,14Z)/18:3(9Z,12Z,15Z)/18:3(9Z,12Z C59H94O6      | 897.6990899 | No |
| 14168 | HMDB0054708 | TG(22:4(7Z,10Z,13Z,16Z)/14:1(9Z)/20:5(5Z,8Z,11Z,14Z C59H94O6      | 897.6990899 | No |
| 14168 | HMDB0054913 | TG(22:5(4Z,7Z,10Z,13Z,16Z)/14:0/20:5(5Z,8Z,11Z,14Z, C59H94O6      | 897.6990899 | No |
| 14168 | HMDB0054968 | TG(22:5(4Z,7Z,10Z,13Z,16Z)/14:1(9Z)/20:4(8Z,11Z,14Z C59H94O6      | 897.6990899 | No |
| 14168 | HMDB0054975 | TG(22:5(4Z,7Z,10Z,13Z,16Z)/16:1(9Z)/18:4(6Z,9Z,12Z,1C59H94O6      | 897.6990899 | No |
| 14168 | HMDB0055209 | TG(18:3(9Z,12Z,15Z)/16:1(9Z)/22:6(4Z,7Z,10Z,13Z,16Z C59H94O6      | 897.6990899 | No |
| 14168 | HMDB0055233 | TG(18:3(9Z,12Z,15Z)/20:3(5Z,8Z,11Z)/18:4(6Z,9Z,12Z,1C59H94O6      | 897.6990899 | No |
| 14168 | HMDB0055262 | TG(18:3(9Z,12Z,15Z)/18:3(6Z,9Z,12Z)/20:4(8Z,11Z,14Z C59H94O6      | 897.6990899 | No |
| 14168 | HMDB0055275 | TG(18:3(9Z,12Z,15Z)/20:3n6/18:4(6Z,9Z,12Z,15Z)) C59H94O6          | 897.6990899 | No |
| 14168 | HMDB0055311 | TG(18:3(9Z,12Z,15Z)/18:3(9Z,12Z,15Z)/20:4(8Z,11Z,14 C59H94O6      | 897.6990899 | No |
| 14168 | HMDB0055323 | TG(18:3(9Z,12Z,15Z)/20:4(8Z,11Z,14Z,17Z)/18:3(9Z,12 C59H94O6      | 897.6990899 | No |
| 14168 | HMDB0055373 | TG(18:4(6Z,9Z,12Z,15Z)/16:0/22:6(4Z,7Z,10Z,13Z,16Z, C59H94O6      | 897.6990899 | No |
| 14168 | HMDB0055408 | TG(18:4(6Z,9Z,12Z,15Z)/16:1(9Z)/22:5(7Z,10Z,13Z,16Z C59H94O6      | 897.6990899 | No |
| 14168 | HMDB0055413 | TG(18:4(6Z,9Z,12Z,15Z)/18:1(11Z)/20:5(5Z,8Z,11Z,14Z C59H94O6      | 897.6990899 | No |
| 14168 | HMDB0055419 | TG(18:4(6Z,9Z,12Z,15Z)/18:1(9Z)/20:5(5Z,8Z,11Z,14Z,1C59H94O6      | 897.6990899 | No |
| 14168 | HMDB0055448 | TG(18:4(6Z,9Z,12Z,15Z)/18:2(9Z,12Z)/20:4(8Z,11Z,14Z C59H94O6      | 897.6990899 | No |
| 14168 | HMDB0055459 | TG(18:4(6Z,9Z,12Z,15Z)/20:2n6/18:4(6Z,9Z,12Z,15Z)) C59H94O6       | 897.6990899 | No |
| 14168 | HMDB0055539 | TG(20:4(8Z,11Z,14Z,17Z)/14:0/22:6(4Z,7Z,10Z,13Z,16Z C59H94O6      | 897.6990899 | No |
| 14168 | HMDB0055573 | TG(20:4(8Z,11Z,14Z,17Z)/14:1(9Z)/22:5(7Z,10Z,13Z,16 C59H94O6      | 897.6990899 | No |
| 14168 | HMDB0055577 | TG(20:4(8Z,11Z,14Z,17Z)/16:1(9Z)/20:5(5Z,8Z,11Z,14Z C59H94O6      | 897.6990899 | No |
| 14168 | HMDB0055686 | TG(20:5(5Z,8Z,11Z,14Z,17Z)/14:0/22:5(7Z,10Z,13Z,16Z C59H94O6      | 897.6990899 | No |
| 14168 | HMDB0055693 | TG(20:5(5Z,8Z,11Z,14Z,17Z)/16:0/20:5(5Z,8Z,11Z,14Z, C59H94O6      | 897.6990899 | No |
| 14205 | HMDB0116797 | CL(8:0/8:0/8:0/8:0) C41H78O17P2                                   | 903.4640384 | No |
| 14268 | HMDB0125940 | {3-[5-(3,4-dihydroxyphenyl)-6,9,17,19,21-pentahydrox C45H36O19S   | 911.1472092 | No |
| 14268 | HMDB0125941 | {3-[4-[5-(3,4-dihydroxyphenyl)-6,9,17,19,21-pentahydr C45H36O19S  | 911.1472092 | No |
| 14268 | HMDB0125943 | {3-[18-[2-(3,4-dihydroxyphenyl)-3,5,7-trihydroxy-3,4-d C45H36O19S | 911.1472092 | No |
| 14268 | HMDB0125944 | {2-hydroxy-5-[3,5,7-trihydroxy-4-[6,9,17,19,21-pentah C45H36O19S  | 911.1472092 | No |
| 14268 | HMDB0125945 | {3-[18-[2-(3,4-dihydroxyphenyl)-3,5,7-trihydroxy-3,4-d C45H36O19S | 911.1472092 | No |
| 14268 | HMDB0125946 | [2-(3,4-dihydroxyphenyl)-5,7-dihydroxy-4-[6,9,17,19,2 C45H36O19S  | 911.1472092 | No |
| 14268 | HMDB0125947 | {18-[2-(3,4-dihydroxyphenyl)-3,5,7-trihydroxy-3,4-dihy C45H36O19S | 911.1472092 | No |
| 14268 | HMDB0125948 | {18-[2-(3,4-dihydroxyphenyl)-3,5,7-trihydroxy-3,4-dihy C45H36O19S | 911.1472092 | No |
| 14268 | HMDB0125950 | {3-[4-[13-(3,4-dihydroxyphenyl)-6,9,17,19,21-pentahy C45H36O19S   | 911.1472092 | No |
| 14268 | HMDB0125951 | {3-[13-(3,4-dihydroxyphenyl)-6,9,17,19,21-pentahydro C45H36O19S   | 911.1472092 | No |
| 14271 | HMDB0039295 | Medicagenic acid 28-O-[b-D-xylosyl-(1->4)-a-L-rhamno C46H72O18    | 911.4643155 | No |
| 14526 | HMDB0044248 | TG(16:0/24:1(15Z)/o-18:0) C61H118O5                               | 929.8898366 | No |
| 14526 | HMDB0044653 | TG(16:0/o-18:0/24:1(15Z)) C61H118O5                               | 929.8898366 | No |
| 14526 | HMDB0045045 | TG(18:0/22:1(13Z)/o-18:0) C61H118O5                               | 929.8898366 | No |
| 14526 | HMDB0045461 | TG(18:0/o-18:0/22:1(13Z)) C61H118O5                               | 929.8898366 | No |
| 14526 | HMDB0045788 | TG(20:0/20:1(11Z)/o-18:0) C61H118O5                               | 929.8898366 | No |
| 14526 | HMDB0046238 | TG(20:0/o-18:0/20:1(11Z)) C61H118O5                               | 929.8898366 | No |
| 14526 | HMDB0046505 | TG(22:0/18:1(11Z)/o-18:0) C61H118O5                               | 929.8898366 | No |
| 14526 | HMDB0046530 | TG(22:0/18:1(9Z)/o-18:0) C61H118O5                                | 929.8898366 | No |
| 14526 | HMDB0046985 | TG(22:0/o-18:0/18:1(11Z)) C61H118O5                               | 929.8898366 | No |
| 14526 | HMDB0046986 | TG(22:0/o-18:0/18:1(9Z)) C61H118O5                                | 929.8898366 | No |
| 14526 | HMDB0047220 | TG(24:0/16:1(9Z)/o-18:0) C61H118O5                                | 929.8898366 | No |
| 14526 | HMDB0047703 | TG(24:0/o-18:0/16:1(9Z)) C61H118O5                                | 929.8898366 | No |
| 14526 | HMDB0048566 | TG(16:1(9Z)/24:0/o-18:0) C61H118O5                                | 929.8898366 | No |
| 14526 | HMDB0049197 | TG(18:1(11Z)/22:0/o-18:0) C61H118O5                               | 929.8898366 | No |

|       |                                  |                                                               |                |             |    |
|-------|----------------------------------|---------------------------------------------------------------|----------------|-------------|----|
| 14526 | HMDB0049820                      | TG(18:1(9Z)/22:0/o-18:0)                                      | C61H118O5      | 929.8898366 | No |
| 14526 | HMDB0050394                      | TG(20:1(11Z)/20:0/o-18:0)                                     | C61H118O5      | 929.8898366 | No |
| 14526 | HMDB0051475                      | TG(22:1(13Z)/18:0/o-18:0)                                     | C61H118O5      | 929.8898366 | No |
| 14526 | HMDB0051964                      | TG(24:1(15Z)/16:0/o-18:0)                                     | C61H118O5      | 929.8898366 | No |
| 14623 | HMDB0006403; C12450              | Pseudoecgonyl-CoA                                             | C30H49N8O18P3S | 933.204308  | No |
| 14646 | HMDB0003939; C05265; CHEBI:28528 | 3-Oxodecanoyl-CoA                                             | C31H52N7O18P3S | 934.2240308 | No |
| 14646 | HMDB0004601; C11947              | 3-Hydroxy-2,6-dimethyl-5-methylene-heptanoyl-CoA              | C31H52N7O18P3S | 934.2240308 | No |
| 14682 | HMDB0003938; C05264; CHEBI:28325 | (S)-Hydroxydecanoyl-CoA                                       | C31H54N7O18P3S | 936.236238  | No |
| 14706 | HMDB0029950                      | Punicafolin                                                   | C41H30O26      | 937.0934359 | No |
| 14706 | HMDB0039265; C10224              | Tellimagrandin II                                             | C41H30O26      | 937.0934359 | No |
| 14838 | HMDB0043567                      | TG(15:0/22:2(13Z,16Z)/22:6(4Z,7Z,10Z,13Z,16Z,19Z))            | C62H104O6      | 943.7773583 | No |
| 14838 | HMDB0043589                      | TG(15:0/22:4(7Z,10Z,13Z,16Z)/22:4(7Z,10Z,13Z,16Z))            | C62H104O6      | 943.7773583 | No |
| 14838 | HMDB0043791                      | TG(15:0/22:6(4Z,7Z,10Z,13Z,16Z,19Z)/22:2(13Z,16Z))            | C62H104O6      | 943.7773583 | No |
| 14838 | HMDB0054359                      | TG(22:2(13Z,16Z)/15:0/22:6(4Z,7Z,10Z,13Z,16Z,19Z))            | C62H104O6      | 943.7773583 | No |
| 14838 | HMDB0054649                      | TG(22:4(7Z,10Z,13Z,16Z)/15:0/22:4(7Z,10Z,13Z,16Z))            | C62H104O6      | 943.7773583 | No |
| 14899 | HMDB0001380                      | Diguanosine pentaphosphate                                    | C20H29N10O24P5 | 946.9994439 | No |
| 14924 | HMDB0060160                      | 3-Oxo-4(R),8-dimethyl-nonanoyl-CoA                            | C32H54N7O18P3S | 948.238553  | No |
| 14933 | HMDB0113796                      | PE-NMe(13D5/13D5)                                             | C54H96NO10P    | 948.670929  | No |
| 14933 | HMDB0114701                      | PE-NMe2(13D5/13M5)                                            | C54H96NO10P    | 948.670929  | No |
| 14933 | HMDB0114709                      | PE-NMe2(13M5/13D5)                                            | C54H96NO10P    | 948.670929  | No |
| 15056 | HMDB0012223; C09818; CHEBI:27639 | E-Phenylitaconyl-CoA                                          | C32H44N7O19P3S | 954.1576039 | No |
| 15086 | HMDB0046022                      | TG(20:0/22:2(13Z,16Z)/o-18:0)                                 | C63H120O5      | 955.9062061 | No |
| 15086 | HMDB0046247                      | TG(20:0/o-18:0/22:2(13Z,16Z))                                 | C63H120O5      | 955.9062061 | No |
| 15086 | HMDB0046705                      | TG(22:0/20:2n6/o-18:0)                                        | C63H120O5      | 955.9062061 | No |
| 15086 | HMDB0046993                      | TG(22:0/o-18:0/20:2n6)                                        | C63H120O5      | 955.9062061 | No |
| 15086 | HMDB0047388                      | TG(24:0/18:2(9Z,12Z)/o-18:0)                                  | C63H120O5      | 955.9062061 | No |
| 15086 | HMDB0047710                      | TG(24:0/o-18:0/18:2(9Z,12Z))                                  | C63H120O5      | 955.9062061 | No |
| 15086 | HMDB0049386                      | TG(18:1(11Z)/24:1(15Z)/o-18:0)                                | C63H120O5      | 955.9062061 | No |
| 15086 | HMDB0049686                      | TG(18:1(11Z)/o-18:0/24:1(15Z))                                | C63H120O5      | 955.9062061 | No |
| 15086 | HMDB0050000                      | TG(18:1(9Z)/24:1(15Z)/o-18:0)                                 | C63H120O5      | 955.9062061 | No |
| 15086 | HMDB0050285                      | TG(18:1(9Z)/o-18:0/24:1(15Z))                                 | C63H120O5      | 955.9062061 | No |
| 15086 | HMDB0050565                      | TG(20:1(11Z)/22:1(13Z)/o-18:0)                                | C63H120O5      | 955.9062061 | No |
| 15086 | HMDB0050853                      | TG(20:1(11Z)/o-18:0/22:1(13Z))                                | C63H120O5      | 955.9062061 | No |
| 15086 | HMDB0051611                      | TG(22:1(13Z)/20:1(11Z)/o-18:0)                                | C63H120O5      | 955.9062061 | No |
| 15086 | HMDB0052076                      | TG(24:1(15Z)/18:1(11Z)/o-18:0)                                | C63H120O5      | 955.9062061 | No |
| 15086 | HMDB0052092                      | TG(24:1(15Z)/18:1(9Z)/o-18:0)                                 | C63H120O5      | 955.9062061 | No |
| 15086 | HMDB0052500                      | TG(18:2(9Z,12Z)/24:0/o-18:0)                                  | C63H120O5      | 955.9062061 | No |
| 15086 | HMDB0053341                      | TG(20:2n6/22:0/o-18:0)                                        | C63H120O5      | 955.9062061 | No |
| 15086 | HMDB0054390                      | TG(22:2(13Z,16Z)/20:0/o-18:0)                                 | C63H120O5      | 955.9062061 | No |
| 15192 | HMDB0135051                      | 6-[3-{6,8-bis[3,7-dihydroxy-2-(3-hydroxyphenyl)-3,4-di        | C51H46O19      | 961.2556929 | No |
| 15192 | HMDB0135052                      | 6-[3-{4-[6-[3,7-dihydroxy-2-(3-hydroxyphenyl)-3,4-dihy        | C51H46O19      | 961.2556929 | No |
| 15192 | HMDB0135053                      | 6-[(6,8-bis[3,7-dihydroxy-2-(3-hydroxyphenyl)-3,4-dihy        | C51H46O19      | 961.2556929 | No |
| 15192 | HMDB0135054                      | 6-[3-{4-[8-[3,7-dihydroxy-2-(3-hydroxyphenyl)-3,4-dihy        | C51H46O19      | 961.2556929 | No |
| 15210 | HMDB0116048                      | CDP-DG(18:2(9Z,11Z)/a-15:0)                                   | C45H79N3O15P2  | 962.4940439 | No |
| 15210 | HMDB0116055                      | CDP-DG(18:2(9Z,11Z)/i-15:0)                                   | C45H79N3O15P2  | 962.4940439 | No |
| 15210 | HMDB0116080                      | CDP-DG(a-15:0/18:2(9Z,11Z))                                   | C45H79N3O15P2  | 962.4940439 | No |
| 15210 | HMDB0116205                      | CDP-DG(i-15:0/18:2(9Z,11Z))                                   | C45H79N3O15P2  | 962.4940439 | No |
| 15225 | HMDB0030415                      | Quercetin 3-(6''''''''-feruloylglucosyl)-(1->2)-galactosyl-   | C43H48O25      | 963.2438771 | No |
| 15225 | HMDB0031585                      | Patuletin 3-(2''''''-apiosyl-[2''''''-feruloylgentiobioside]) | C43H48O25      | 963.2438771 | No |
| 15225 | HMDB0040842                      | Quercetin 3-(2-feruloylsophoroside) 7-glucoside               | C43H48O25      | 963.2438771 | No |
| 15242 | HMDB0003936; C05262; CHEBI:27668 | (S)-3-Hydroxydodecanoyl-CoA                                   | C33H58N7O18P3S | 964.2723751 | No |
| 15242 | HMDB0062260                      | 3S-hydroxydodecanoyl-CoA                                      | C33H58N7O18P3S | 964.2723751 | No |
| 15267 | HMDB0005416; C00422              | TG(20:0/20:0/20:4(5Z,8Z,11Z,14Z))                             | C63H114O6      | 965.8569699 | No |
| 15267 | HMDB0042262                      | TG(14:0/24:0/22:4(7Z,10Z,13Z,16Z))                            | C63H114O6      | 965.8569699 | No |
| 15267 | HMDB0042697                      | TG(14:0/22:4(7Z,10Z,13Z,16Z)/24:0)                            | C63H114O6      | 965.8569699 | No |
| 15267 | HMDB0043988                      | TG(16:0/22:0/22:4(7Z,10Z,13Z,16Z))                            | C63H114O6      | 965.8569699 | No |
| 15267 | HMDB0044014                      | TG(16:0/24:0/20:4(5Z,8Z,11Z,14Z))                             | C63H114O6      | 965.8569699 | No |
| 15267 | HMDB0044020                      | TG(16:0/24:0/20:4(8Z,11Z,14Z,17Z))                            | C63H114O6      | 965.8569699 | No |
| 15267 | HMDB0044177                      | TG(16:0/20:3(5Z,8Z,11Z)/24:1(15Z))                            | C63H114O6      | 965.8569699 | No |
| 15267 | HMDB0044231                      | TG(16:0/24:1(15Z)/20:3(5Z,8Z,11Z))                            | C63H114O6      | 965.8569699 | No |
| 15267 | HMDB0044237                      | TG(16:0/24:1(15Z)/20:3n6)                                     | C63H114O6      | 965.8569699 | No |

|       |             |                                      |           |             |    |
|-------|-------------|--------------------------------------|-----------|-------------|----|
| 15267 | HMDB0044345 | TG(16:0/20:3n6/24:1(15Z))            | C63H114O6 | 965.8569699 | No |
| 15267 | HMDB0044365 | TG(16:0/20:4(5Z,8Z,11Z,14Z)/24:0)    | C63H114O6 | 965.8569699 | No |
| 15267 | HMDB0044407 | TG(16:0/22:2(13Z,16Z)/22:2(13Z,16Z)) | C63H114O6 | 965.8569699 | No |
| 15267 | HMDB0044420 | TG(16:0/22:4(7Z,10Z,13Z,16Z)/22:0)   | C63H114O6 | 965.8569699 | No |
| 15267 | HMDB0044533 | TG(16:0/20:4(8Z,11Z,14Z,17Z)/24:0)   | C63H114O6 | 965.8569699 | No |
| 15267 | HMDB0044794 | TG(18:0/20:0/22:4(7Z,10Z,13Z,16Z))   | C63H114O6 | 965.8569699 | No |
| 15267 | HMDB0044819 | TG(18:0/22:0/20:4(5Z,8Z,11Z,14Z))    | C63H114O6 | 965.8569699 | No |
| 15267 | HMDB0044825 | TG(18:0/22:0/20:4(8Z,11Z,14Z,17Z))   | C63H114O6 | 965.8569699 | No |
| 15267 | HMDB0044851 | TG(18:0/24:0/18:4(6Z,9Z,12Z,15Z))    | C63H114O6 | 965.8569699 | No |
| 15267 | HMDB0045002 | TG(18:0/20:3(5Z,8Z,11Z)/22:1(13Z))   | C63H114O6 | 965.8569699 | No |
| 15267 | HMDB0045028 | TG(18:0/22:1(13Z)/20:3(5Z,8Z,11Z))   | C63H114O6 | 965.8569699 | No |
| 15267 | HMDB0045034 | TG(18:0/22:1(13Z)/20:3n6)            | C63H114O6 | 965.8569699 | No |
| 15267 | HMDB0045059 | TG(18:0/24:1(15Z)/18:3(6Z,9Z,12Z))   | C63H114O6 | 965.8569699 | No |
| 15267 | HMDB0045066 | TG(18:0/24:1(15Z)/18:3(9Z,12Z,15Z))  | C63H114O6 | 965.8569699 | No |
| 15267 | HMDB0045111 | TG(18:0/18:3(6Z,9Z,12Z)/24:1(15Z))   | C63H114O6 | 965.8569699 | No |
| 15267 | HMDB0045144 | TG(18:0/20:2n6/22:2(13Z,16Z))        | C63H114O6 | 965.8569699 | No |
| 15267 | HMDB0045164 | TG(18:0/20:3n6/22:1(13Z))            | C63H114O6 | 965.8569699 | No |
| 15267 | HMDB0045183 | TG(18:0/20:4(5Z,8Z,11Z,14Z)/22:0)    | C63H114O6 | 965.8569699 | No |
| 15267 | HMDB0045222 | TG(18:0/22:2(13Z,16Z)/20:2n6)        | C63H114O6 | 965.8569699 | No |
| 15267 | HMDB0045236 | TG(18:0/22:4(7Z,10Z,13Z,16Z)/20:0)   | C63H114O6 | 965.8569699 | No |
| 15267 | HMDB0045300 | TG(18:0/18:3(9Z,12Z,15Z)/24:1(15Z))  | C63H114O6 | 965.8569699 | No |
| 15267 | HMDB0045319 | TG(18:0/18:4(6Z,9Z,12Z,15Z)/24:0)    | C63H114O6 | 965.8569699 | No |
| 15267 | HMDB0045345 | TG(18:0/20:4(8Z,11Z,14Z,17Z)/22:0)   | C63H114O6 | 965.8569699 | No |
| 15267 | HMDB0045572 | TG(20:0/18:0/22:4(7Z,10Z,13Z,16Z))   | C63H114O6 | 965.8569699 | No |
| 15267 | HMDB0045602 | TG(20:0/20:0/20:4(8Z,11Z,14Z,17Z))   | C63H114O6 | 965.8569699 | No |
| 15267 | HMDB0045627 | TG(20:0/22:0/18:4(6Z,9Z,12Z,15Z))    | C63H114O6 | 965.8569699 | No |
| 15267 | HMDB0045771 | TG(20:0/20:1(11Z)/20:3(5Z,8Z,11Z))   | C63H114O6 | 965.8569699 | No |
| 15267 | HMDB0045777 | TG(20:0/20:1(11Z)/20:3n6)            | C63H114O6 | 965.8569699 | No |
| 15267 | HMDB0045796 | TG(20:0/20:3(5Z,8Z,11Z)/20:1(11Z))   | C63H114O6 | 965.8569699 | No |
| 15267 | HMDB0045827 | TG(20:0/22:1(13Z)/18:3(6Z,9Z,12Z))   | C63H114O6 | 965.8569699 | No |
| 15267 | HMDB0045834 | TG(20:0/22:1(13Z)/18:3(9Z,12Z,15Z))  | C63H114O6 | 965.8569699 | No |
| 15267 | HMDB0045883 | TG(20:0/18:2(9Z,12Z)/22:2(13Z,16Z))  | C63H114O6 | 965.8569699 | No |
| 15267 | HMDB0045902 | TG(20:0/18:3(6Z,9Z,12Z)/22:1(13Z))   | C63H114O6 | 965.8569699 | No |
| 15267 | HMDB0045932 | TG(20:0/20:2n6/20:2n6)               | C63H114O6 | 965.8569699 | No |
| 15267 | HMDB0045952 | TG(20:0/20:3n6/20:1(11Z))            | C63H114O6 | 965.8569699 | No |
| 15267 | HMDB0045971 | TG(20:0/20:4(5Z,8Z,11Z,14Z)/20:0)    | C63H114O6 | 965.8569699 | No |
| 15267 | HMDB0046008 | TG(20:0/22:2(13Z,16Z)/18:2(9Z,12Z))  | C63H114O6 | 965.8569699 | No |
| 15267 | HMDB0046084 | TG(20:0/18:3(9Z,12Z,15Z)/22:1(13Z))  | C63H114O6 | 965.8569699 | No |
| 15267 | HMDB0046102 | TG(20:0/18:4(6Z,9Z,12Z,15Z)/22:0)    | C63H114O6 | 965.8569699 | No |
| 15267 | HMDB0046127 | TG(20:0/20:4(8Z,11Z,14Z,17Z)/20:0)   | C63H114O6 | 965.8569699 | No |
| 15267 | HMDB0046322 | TG(22:0/16:0/22:4(7Z,10Z,13Z,16Z))   | C63H114O6 | 965.8569699 | No |
| 15267 | HMDB0046345 | TG(22:0/18:0/20:4(5Z,8Z,11Z,14Z))    | C63H114O6 | 965.8569699 | No |
| 15267 | HMDB0046351 | TG(22:0/18:0/20:4(8Z,11Z,14Z,17Z))   | C63H114O6 | 965.8569699 | No |
| 15267 | HMDB0046375 | TG(22:0/20:0/18:4(6Z,9Z,12Z,15Z))    | C63H114O6 | 965.8569699 | No |
| 15267 | HMDB0046488 | TG(22:0/18:1(11Z)/20:3(5Z,8Z,11Z))   | C63H114O6 | 965.8569699 | No |
| 15267 | HMDB0046494 | TG(22:0/18:1(11Z)/20:3n6)            | C63H114O6 | 965.8569699 | No |
| 15267 | HMDB0046513 | TG(22:0/18:1(9Z)/20:3(5Z,8Z,11Z))    | C63H114O6 | 965.8569699 | No |
| 15267 | HMDB0046519 | TG(22:0/18:1(9Z)/20:3n6)             | C63H114O6 | 965.8569699 | No |
| 15267 | HMDB0046542 | TG(22:0/20:1(11Z)/18:3(6Z,9Z,12Z))   | C63H114O6 | 965.8569699 | No |
| 15267 | HMDB0046549 | TG(22:0/20:1(11Z)/18:3(9Z,12Z,15Z))  | C63H114O6 | 965.8569699 | No |
| 15267 | HMDB0046560 | TG(22:0/20:3(5Z,8Z,11Z)/18:1(11Z))   | C63H114O6 | 965.8569699 | No |
| 15267 | HMDB0046561 | TG(22:0/20:3(5Z,8Z,11Z)/18:1(9Z))    | C63H114O6 | 965.8569699 | No |
| 15267 | HMDB0046643 | TG(22:0/18:2(9Z,12Z)/20:2n6)         | C63H114O6 | 965.8569699 | No |
| 15267 | HMDB0046662 | TG(22:0/18:3(6Z,9Z,12Z)/20:1(11Z))   | C63H114O6 | 965.8569699 | No |
| 15267 | HMDB0046691 | TG(22:0/20:2n6/18:2(9Z,12Z))         | C63H114O6 | 965.8569699 | No |
| 15267 | HMDB0046710 | TG(22:0/20:3n6/18:1(11Z))            | C63H114O6 | 965.8569699 | No |
| 15267 | HMDB0046711 | TG(22:0/20:3n6/18:1(9Z))             | C63H114O6 | 965.8569699 | No |
| 15267 | HMDB0046837 | TG(22:0/18:3(9Z,12Z,15Z)/20:1(11Z))  | C63H114O6 | 965.8569699 | No |
| 15267 | HMDB0047020 | TG(24:0/14:0/22:4(7Z,10Z,13Z,16Z))   | C63H114O6 | 965.8569699 | No |
| 15267 | HMDB0047066 | TG(24:0/16:0/20:4(5Z,8Z,11Z,14Z))    | C63H114O6 | 965.8569699 | No |
| 15267 | HMDB0047072 | TG(24:0/16:0/20:4(8Z,11Z,14Z,17Z))   | C63H114O6 | 965.8569699 | No |



|       |             |                                       |           |             |    |
|-------|-------------|---------------------------------------|-----------|-------------|----|
| 15267 | HMDB0047095 | TG(24:0/18:0/18:4(6Z,9Z,12Z,15Z))     | C63H114O6 | 965.8569699 | No |
| 15267 | HMDB0047203 | TG(24:0/16:1(9Z)/20:3(5Z,8Z,11Z))     | C63H114O6 | 965.8569699 | No |
| 15267 | HMDB0047209 | TG(24:0/16:1(9Z)/20:3n6)              | C63H114O6 | 965.8569699 | No |
| 15267 | HMDB0047231 | TG(24:0/18:1(11Z)/18:3(6Z,9Z,12Z))    | C63H114O6 | 965.8569699 | No |
| 15267 | HMDB0047238 | TG(24:0/18:1(11Z)/18:3(9Z,12Z,15Z))   | C63H114O6 | 965.8569699 | No |
| 15267 | HMDB0047255 | TG(24:0/18:1(9Z)/18:3(6Z,9Z,12Z))     | C63H114O6 | 965.8569699 | No |
| 15267 | HMDB0047262 | TG(24:0/18:1(9Z)/18:3(9Z,12Z,15Z))    | C63H114O6 | 965.8569699 | No |
| 15267 | HMDB0047295 | TG(24:0/20:3(5Z,8Z,11Z)/16:1(9Z))     | C63H114O6 | 965.8569699 | No |
| 15267 | HMDB0047374 | TG(24:0/18:2(9Z,12Z)/18:2(9Z,12Z))    | C63H114O6 | 965.8569699 | No |
| 15267 | HMDB0047392 | TG(24:0/18:3(6Z,9Z,12Z)/18:1(11Z))    | C63H114O6 | 965.8569699 | No |
| 15267 | HMDB0047393 | TG(24:0/18:3(6Z,9Z,12Z)/18:1(9Z))     | C63H114O6 | 965.8569699 | No |
| 15267 | HMDB0047439 | TG(24:0/20:3n6/16:1(9Z))              | C63H114O6 | 965.8569699 | No |
| 15267 | HMDB0047560 | TG(24:0/18:3(9Z,12Z,15Z)/18:1(11Z))   | C63H114O6 | 965.8569699 | No |
| 15267 | HMDB0047561 | TG(24:0/18:3(9Z,12Z,15Z)/18:1(9Z))    | C63H114O6 | 965.8569699 | No |
| 15267 | HMDB0048059 | TG(14:1(9Z)/24:1(15Z)/22:2(13Z,16Z))  | C63H114O6 | 965.8569699 | No |
| 15267 | HMDB0048191 | TG(14:1(9Z)/22:2(13Z,16Z)/24:1(15Z))  | C63H114O6 | 965.8569699 | No |
| 15267 | HMDB0048549 | TG(16:1(9Z)/24:0/20:3(5Z,8Z,11Z))     | C63H114O6 | 965.8569699 | No |
| 15267 | HMDB0048555 | TG(16:1(9Z)/24:0/20:3n6)              | C63H114O6 | 965.8569699 | No |
| 15267 | HMDB0048711 | TG(16:1(9Z)/22:1(13Z)/22:2(13Z,16Z))  | C63H114O6 | 965.8569699 | No |
| 15267 | HMDB0048730 | TG(16:1(9Z)/24:1(15Z)/20:2n6)         | C63H114O6 | 965.8569699 | No |
| 15267 | HMDB0048793 | TG(16:1(9Z)/20:2n6/24:1(15Z))         | C63H114O6 | 965.8569699 | No |
| 15267 | HMDB0048858 | TG(16:1(9Z)/22:2(13Z,16Z)/22:1(13Z))  | C63H114O6 | 965.8569699 | No |
| 15267 | HMDB0049180 | TG(18:1(11Z)/22:0/20:3(5Z,8Z,11Z))    | C63H114O6 | 965.8569699 | No |
| 15267 | HMDB0049186 | TG(18:1(11Z)/22:0/20:3n6)             | C63H114O6 | 965.8569699 | No |
| 15267 | HMDB0049205 | TG(18:1(11Z)/24:0/18:3(6Z,9Z,12Z))    | C63H114O6 | 965.8569699 | No |
| 15267 | HMDB0049212 | TG(18:1(11Z)/24:0/18:3(9Z,12Z,15Z))   | C63H114O6 | 965.8569699 | No |
| 15267 | HMDB0049314 | TG(18:1(11Z)/20:1(11Z)/22:2(13Z,16Z)) | C63H114O6 | 965.8569699 | No |
| 15267 | HMDB0049353 | TG(18:1(11Z)/22:1(13Z)/20:2n6)        | C63H114O6 | 965.8569699 | No |
| 15267 | HMDB0049372 | TG(18:1(11Z)/24:1(15Z)/18:2(9Z,12Z))  | C63H114O6 | 965.8569699 | No |
| 15267 | HMDB0049392 | TG(18:1(11Z)/18:2(9Z,12Z)/24:1(15Z))  | C63H114O6 | 965.8569699 | No |
| 15267 | HMDB0049433 | TG(18:1(11Z)/20:2n6/22:1(13Z))        | C63H114O6 | 965.8569699 | No |
| 15267 | HMDB0049494 | TG(18:1(11Z)/22:2(13Z,16Z)/20:1(11Z)) | C63H114O6 | 965.8569699 | No |
| 15267 | HMDB0049803 | TG(18:1(9Z)/22:0/20:3(5Z,8Z,11Z))     | C63H114O6 | 965.8569699 | No |
| 15267 | HMDB0049809 | TG(18:1(9Z)/22:0/20:3n6)              | C63H114O6 | 965.8569699 | No |
| 15267 | HMDB0049827 | TG(18:1(9Z)/24:0/18:3(6Z,9Z,12Z))     | C63H114O6 | 965.8569699 | No |
| 15267 | HMDB0049834 | TG(18:1(9Z)/24:0/18:3(9Z,12Z,15Z))    | C63H114O6 | 965.8569699 | No |
| 15267 | HMDB0049931 | TG(18:1(9Z)/20:1(11Z)/22:2(13Z,16Z))  | C63H114O6 | 965.8569699 | No |
| 15267 | HMDB0049968 | TG(18:1(9Z)/22:1(13Z)/20:2n6)         | C63H114O6 | 965.8569699 | No |
| 15267 | HMDB0049986 | TG(18:1(9Z)/24:1(15Z)/18:2(9Z,12Z))   | C63H114O6 | 965.8569699 | No |
| 15267 | HMDB0050005 | TG(18:1(9Z)/18:2(9Z,12Z)/24:1(15Z))   | C63H114O6 | 965.8569699 | No |
| 15267 | HMDB0050044 | TG(18:1(9Z)/20:2n6/22:1(13Z))         | C63H114O6 | 965.8569699 | No |
| 15267 | HMDB0050102 | TG(18:1(9Z)/22:2(13Z,16Z)/20:1(11Z))  | C63H114O6 | 965.8569699 | No |
| 15267 | HMDB0050377 | TG(20:1(11Z)/20:0/20:3(5Z,8Z,11Z))    | C63H114O6 | 965.8569699 | No |
| 15267 | HMDB0050383 | TG(20:1(11Z)/20:0/20:3n6)             | C63H114O6 | 965.8569699 | No |
| 15267 | HMDB0050400 | TG(20:1(11Z)/22:0/18:3(6Z,9Z,12Z))    | C63H114O6 | 965.8569699 | No |
| 15267 | HMDB0050407 | TG(20:1(11Z)/22:0/18:3(9Z,12Z,15Z))   | C63H114O6 | 965.8569699 | No |
| 15267 | HMDB0050480 | TG(20:1(11Z)/18:1(11Z)/22:2(13Z,16Z)) | C63H114O6 | 965.8569699 | No |
| 15267 | HMDB0050499 | TG(20:1(11Z)/18:1(9Z)/22:2(13Z,16Z))  | C63H114O6 | 965.8569699 | No |
| 15267 | HMDB0050515 | TG(20:1(11Z)/20:1(11Z)/20:2n6)        | C63H114O6 | 965.8569699 | No |
| 15267 | HMDB0050551 | TG(20:1(11Z)/22:1(13Z)/18:2(9Z,12Z))  | C63H114O6 | 965.8569699 | No |
| 15267 | HMDB0050587 | TG(20:1(11Z)/18:2(9Z,12Z)/22:1(13Z))  | C63H114O6 | 965.8569699 | No |
| 15267 | HMDB0050623 | TG(20:1(11Z)/20:2n6/20:1(11Z))        | C63H114O6 | 965.8569699 | No |
| 15267 | HMDB0050907 | TG(20:3(5Z,8Z,11Z)/16:0/24:1(15Z))    | C63H114O6 | 965.8569699 | No |
| 15267 | HMDB0050924 | TG(20:3(5Z,8Z,11Z)/18:0/22:1(13Z))    | C63H114O6 | 965.8569699 | No |
| 15267 | HMDB0051464 | TG(22:1(13Z)/18:0/20:3n6)             | C63H114O6 | 965.8569699 | No |
| 15267 | HMDB0051479 | TG(22:1(13Z)/20:0/18:3(6Z,9Z,12Z))    | C63H114O6 | 965.8569699 | No |
| 15267 | HMDB0051486 | TG(22:1(13Z)/20:0/18:3(9Z,12Z,15Z))   | C63H114O6 | 965.8569699 | No |
| 15267 | HMDB0051551 | TG(22:1(13Z)/16:1(9Z)/22:2(13Z,16Z))  | C63H114O6 | 965.8569699 | No |
| 15267 | HMDB0051565 | TG(22:1(13Z)/18:1(11Z)/20:2n6)        | C63H114O6 | 965.8569699 | No |
| 15267 | HMDB0051582 | TG(22:1(13Z)/18:1(9Z)/20:2n6)         | C63H114O6 | 965.8569699 | No |
| 15267 | HMDB0051597 | TG(22:1(13Z)/20:1(11Z)/18:2(9Z,12Z))  | C63H114O6 | 965.8569699 | No |

|       |                     |                                      |           |             |    |
|-------|---------------------|--------------------------------------|-----------|-------------|----|
| 15267 | HMDB0051953         | TG(24:1(15Z)/16:0/20:3n6)            | C63H114O6 | 965.8569699 | No |
| 15267 | HMDB0051967         | TG(24:1(15Z)/18:0/18:3(6Z,9Z,12Z))   | C63H114O6 | 965.8569699 | No |
| 15267 | HMDB0051974         | TG(24:1(15Z)/18:0/18:3(9Z,12Z,15Z))  | C63H114O6 | 965.8569699 | No |
| 15267 | HMDB0052035         | TG(24:1(15Z)/14:1(9Z)/22:2(13Z,16Z)) | C63H114O6 | 965.8569699 | No |
| 15267 | HMDB0052048         | TG(24:1(15Z)/16:1(9Z)/20:2n6)        | C63H114O6 | 965.8569699 | No |
| 15267 | HMDB0052062         | TG(24:1(15Z)/18:1(11Z)/18:2(9Z,12Z)) | C63H114O6 | 965.8569699 | No |
| 15267 | HMDB0052078         | TG(24:1(15Z)/18:1(9Z)/18:2(9Z,12Z))  | C63H114O6 | 965.8569699 | No |
| 15267 | HMDB0052461         | TG(18:2(9Z,12Z)/20:0/22:2(13Z,16Z))  | C63H114O6 | 965.8569699 | No |
| 15267 | HMDB0052473         | TG(18:2(9Z,12Z)/22:0/20:2n6)         | C63H114O6 | 965.8569699 | No |
| 15267 | HMDB0052486         | TG(18:2(9Z,12Z)/24:0/18:2(9Z,12Z))   | C63H114O6 | 965.8569699 | No |
| 15267 | HMDB0053306         | TG(20:2n6/18:0/22:2(13Z,16Z))        | C63H114O6 | 965.8569699 | No |
| 15267 | HMDB0053316         | TG(20:2n6/20:0/20:2n6)               | C63H114O6 | 965.8569699 | No |
| 15267 | HMDB0054361         | TG(22:2(13Z,16Z)/16:0/22:2(13Z,16Z)) | C63H114O6 | 965.8569699 | No |
| 15297 | HMDB0005464; C00422 | TG(20:1(11Z)/20:1(11Z)/20:1(11Z))    | C63H116O6 | 967.8709673 | No |
| 15297 | HMDB0042501         | TG(14:0/24:1(15Z)/22:2(13Z,16Z))     | C63H116O6 | 967.8709673 | No |
| 15297 | HMDB0042675         | TG(14:0/22:2(13Z,16Z)/24:1(15Z))     | C63H116O6 | 967.8709673 | No |
| 15297 | HMDB0044007         | TG(16:0/24:0/20:3(5Z,8Z,11Z))        | C63H116O6 | 967.8709673 | No |
| 15297 | HMDB0044013         | TG(16:0/24:0/20:3n6)                 | C63H116O6 | 967.8709673 | No |
| 15297 | HMDB0044169         | TG(16:0/20:3(5Z,8Z,11Z)/24:0)        | C63H116O6 | 967.8709673 | No |
| 15297 | HMDB0044211         | TG(16:0/22:1(13Z)/22:2(13Z,16Z))     | C63H116O6 | 967.8709673 | No |
| 15297 | HMDB0044236         | TG(16:0/24:1(15Z)/20:2n6)            | C63H116O6 | 967.8709673 | No |
| 15297 | HMDB0044317         | TG(16:0/20:2n6/24:1(15Z))            | C63H116O6 | 967.8709673 | No |
| 15297 | HMDB0044337         | TG(16:0/20:3n6/24:0)                 | C63H116O6 | 967.8709673 | No |
| 15297 | HMDB0044400         | TG(16:0/22:2(13Z,16Z)/22:1(13Z))     | C63H116O6 | 967.8709673 | No |
| 15297 | HMDB0044812         | TG(18:0/22:0/20:3(5Z,8Z,11Z))        | C63H116O6 | 967.8709673 | No |
| 15297 | HMDB0044818         | TG(18:0/22:0/20:3n6)                 | C63H116O6 | 967.8709673 | No |
| 15297 | HMDB0044843         | TG(18:0/24:0/18:3(6Z,9Z,12Z))        | C63H116O6 | 967.8709673 | No |
| 15297 | HMDB0044850         | TG(18:0/24:0/18:3(9Z,12Z,15Z))       | C63H116O6 | 967.8709673 | No |
| 15297 | HMDB0044982         | TG(18:0/20:1(11Z)/22:2(13Z,16Z))     | C63H116O6 | 967.8709673 | No |
| 15297 | HMDB0044994         | TG(18:0/20:3(5Z,8Z,11Z)/22:0)        | C63H116O6 | 967.8709673 | No |
| 15297 | HMDB0045033         | TG(18:0/22:1(13Z)/20:2n6)            | C63H116O6 | 967.8709673 | No |
| 15297 | HMDB0045058         | TG(18:0/24:1(15Z)/18:2(9Z,12Z))      | C63H116O6 | 967.8709673 | No |
| 15297 | HMDB0045084         | TG(18:0/18:2(9Z,12Z)/24:1(15Z))      | C63H116O6 | 967.8709673 | No |
| 15297 | HMDB0045103         | TG(18:0/18:3(6Z,9Z,12Z)/24:0)        | C63H116O6 | 967.8709673 | No |
| 15297 | HMDB0045137         | TG(18:0/20:2n6/22:1(13Z))            | C63H116O6 | 967.8709673 | No |
| 15297 | HMDB0045156         | TG(18:0/20:3n6/22:0)                 | C63H116O6 | 967.8709673 | No |
| 15297 | HMDB0045216         | TG(18:0/22:2(13Z,16Z)/20:1(11Z))     | C63H116O6 | 967.8709673 | No |
| 15297 | HMDB0045292         | TG(18:0/18:3(9Z,12Z,15Z)/24:0)       | C63H116O6 | 967.8709673 | No |
| 15297 | HMDB0045589         | TG(20:0/20:0/20:3(5Z,8Z,11Z))        | C63H116O6 | 967.8709673 | No |
| 15297 | HMDB0045595         | TG(20:0/20:0/20:3n6)                 | C63H116O6 | 967.8709673 | No |
| 15297 | HMDB0045619         | TG(20:0/22:0/18:3(6Z,9Z,12Z))        | C63H116O6 | 967.8709673 | No |
| 15297 | HMDB0045626         | TG(20:0/22:0/18:3(9Z,12Z,15Z))       | C63H116O6 | 967.8709673 | No |
| 15297 | HMDB0045727         | TG(20:0/18:1(11Z)/22:2(13Z,16Z))     | C63H116O6 | 967.8709673 | No |
| 15297 | HMDB0045753         | TG(20:0/18:1(9Z)/22:2(13Z,16Z))      | C63H116O6 | 967.8709673 | No |
| 15297 | HMDB0045776         | TG(20:0/20:1(11Z)/20:2n6)            | C63H116O6 | 967.8709673 | No |
| 15297 | HMDB0045789         | TG(20:0/20:3(5Z,8Z,11Z)/20:0)        | C63H116O6 | 967.8709673 | No |
| 15297 | HMDB0045826         | TG(20:0/22:1(13Z)/18:2(9Z,12Z))      | C63H116O6 | 967.8709673 | No |
| 15297 | HMDB0045876         | TG(20:0/18:2(9Z,12Z)/22:1(13Z))      | C63H116O6 | 967.8709673 | No |
| 15297 | HMDB0045894         | TG(20:0/18:3(6Z,9Z,12Z)/22:0)        | C63H116O6 | 967.8709673 | No |
| 15297 | HMDB0045926         | TG(20:0/20:2n6/20:1(11Z))            | C63H116O6 | 967.8709673 | No |
| 15297 | HMDB0045945         | TG(20:0/20:3n6/20:0)                 | C63H116O6 | 967.8709673 | No |
| 15297 | HMDB0046002         | TG(20:0/22:2(13Z,16Z)/18:1(11Z))     | C63H116O6 | 967.8709673 | No |
| 15297 | HMDB0046003         | TG(20:0/22:2(13Z,16Z)/18:1(9Z))      | C63H116O6 | 967.8709673 | No |
| 15297 | HMDB0046076         | TG(20:0/18:3(9Z,12Z,15Z)/22:0)       | C63H116O6 | 967.8709673 | No |
| 15297 | HMDB0046338         | TG(22:0/18:0/20:3(5Z,8Z,11Z))        | C63H116O6 | 967.8709673 | No |
| 15297 | HMDB0046344         | TG(22:0/18:0/20:3n6)                 | C63H116O6 | 967.8709673 | No |
| 15297 | HMDB0046367         | TG(22:0/20:0/18:3(6Z,9Z,12Z))        | C63H116O6 | 967.8709673 | No |
| 15297 | HMDB0046374         | TG(22:0/20:0/18:3(9Z,12Z,15Z))       | C63H116O6 | 967.8709673 | No |
| 15297 | HMDB0046471         | TG(22:0/16:1(9Z)/22:2(13Z,16Z))      | C63H116O6 | 967.8709673 | No |
| 15297 | HMDB0046493         | TG(22:0/18:1(11Z)/20:2n6)            | C63H116O6 | 967.8709673 | No |
| 15297 | HMDB0046518         | TG(22:0/18:1(9Z)/20:2n6)             | C63H116O6 | 967.8709673 | No |

|       |             |                                             |           |             |    |
|-------|-------------|---------------------------------------------|-----------|-------------|----|
| 15297 | HMDB0046541 | TG(22:0/20:1(11Z)/18:2(9Z,12Z))             | C63H116O6 | 967.8709673 | No |
| 15297 | HMDB0046637 | TG(22:0/18:2(9Z,12Z)/20:1(11Z))             | C63H116O6 | 967.8709673 | No |
| 15297 | HMDB0046685 | TG(22:0/20:2n6/18:1(11Z))                   | C63H116O6 | 967.8709673 | No |
| 15297 | HMDB0046686 | TG(22:0/20:2n6/18:1(9Z))                    | C63H116O6 | 967.8709673 | No |
| 15297 | HMDB0046759 | TG(22:0/22:2(13Z,16Z)/16:1(9Z))             | C63H116O6 | 967.8709673 | No |
| 15297 | HMDB0047059 | TG(24:0/16:0/20:3(5Z,8Z,11Z))               | C63H116O6 | 967.8709673 | No |
| 15297 | HMDB0047065 | TG(24:0/16:0/20:3n6)                        | C63H116O6 | 967.8709673 | No |
| 15297 | HMDB0047087 | TG(24:0/18:0/18:3(6Z,9Z,12Z))               | C63H116O6 | 967.8709673 | No |
| 15297 | HMDB0047094 | TG(24:0/18:0/18:3(9Z,12Z,15Z))              | C63H116O6 | 967.8709673 | No |
| 15297 | HMDB0047187 | TG(24:0/14:1(9Z)/22:2(13Z,16Z))             | C63H116O6 | 967.8709673 | No |
| 15297 | HMDB0047208 | TG(24:0/16:1(9Z)/20:2n6)                    | C63H116O6 | 967.8709673 | No |
| 15297 | HMDB0047230 | TG(24:0/18:1(11Z)/18:2(9Z,12Z))             | C63H116O6 | 967.8709673 | No |
| 15297 | HMDB0047254 | TG(24:0/18:1(9Z)/18:2(9Z,12Z))              | C63H116O6 | 967.8709673 | No |
| 15297 | HMDB0047368 | TG(24:0/18:2(9Z,12Z)/18:1(11Z))             | C63H116O6 | 967.8709673 | No |
| 15297 | HMDB0047369 | TG(24:0/18:2(9Z,12Z)/18:1(9Z))              | C63H116O6 | 967.8709673 | No |
| 15297 | HMDB0047415 | TG(24:0/20:2n6/16:1(9Z))                    | C63H116O6 | 967.8709673 | No |
| 15297 | HMDB0047486 | TG(24:0/22:2(13Z,16Z)/14:1(9Z))             | C63H116O6 | 967.8709673 | No |
| 15297 | HMDB0047875 | TG(14:1(9Z)/24:0/22:2(13Z,16Z))             | C63H116O6 | 967.8709673 | No |
| 15297 | HMDB0048030 | TG(14:1(9Z)/22:1(13Z)/24:1(15Z))            | C63H116O6 | 967.8709673 | No |
| 15297 | HMDB0048052 | TG(14:1(9Z)/24:1(15Z)/22:1(13Z))            | C63H116O6 | 967.8709673 | No |
| 15297 | HMDB0048535 | TG(16:1(9Z)/22:0/22:2(13Z,16Z))             | C63H116O6 | 967.8709673 | No |
| 15297 | HMDB0048554 | TG(16:1(9Z)/24:0/20:2n6)                    | C63H116O6 | 967.8709673 | No |
| 15297 | HMDB0048661 | TG(16:1(9Z)/20:1(11Z)/24:1(15Z))            | C63H116O6 | 967.8709673 | No |
| 15297 | HMDB0048704 | TG(16:1(9Z)/22:1(13Z)/22:1(13Z))            | C63H116O6 | 967.8709673 | No |
| 15297 | HMDB0048724 | TG(16:1(9Z)/24:1(15Z)/20:1(11Z))            | C63H116O6 | 967.8709673 | No |
| 15297 | HMDB0049167 | TG(18:1(11Z)/20:0/22:2(13Z,16Z))            | C63H116O6 | 967.8709673 | No |
| 15297 | HMDB0049185 | TG(18:1(11Z)/22:0/20:2n6)                   | C63H116O6 | 967.8709673 | No |
| 15297 | HMDB0049204 | TG(18:1(11Z)/24:0/18:2(9Z,12Z))             | C63H116O6 | 967.8709673 | No |
| 15297 | HMDB0049266 | TG(18:1(11Z)/18:1(11Z)/24:1(15Z))           | C63H116O6 | 967.8709673 | No |
| 15297 | HMDB0049287 | TG(18:1(11Z)/18:1(9Z)/24:1(15Z))            | C63H116O6 | 967.8709673 | No |
| 15297 | HMDB0049307 | TG(18:1(11Z)/20:1(11Z)/22:1(13Z))           | C63H116O6 | 967.8709673 | No |
| 15297 | HMDB0049347 | TG(18:1(11Z)/22:1(13Z)/20:1(11Z))           | C63H116O6 | 967.8709673 | No |
| 15297 | HMDB0049366 | TG(18:1(11Z)/24:1(15Z)/18:1(11Z))           | C63H116O6 | 967.8709673 | No |
| 15297 | HMDB0049367 | TG(18:1(11Z)/24:1(15Z)/18:1(9Z))            | C63H116O6 | 967.8709673 | No |
| 15297 | HMDB0049791 | TG(18:1(9Z)/20:0/22:2(13Z,16Z))             | C63H116O6 | 967.8709673 | No |
| 15297 | HMDB0049808 | TG(18:1(9Z)/22:0/20:2n6)                    | C63H116O6 | 967.8709673 | No |
| 15297 | HMDB0049826 | TG(18:1(9Z)/24:0/18:2(9Z,12Z))              | C63H116O6 | 967.8709673 | No |
| 15297 | HMDB0049885 | TG(18:1(9Z)/18:1(11Z)/24:1(15Z))            | C63H116O6 | 967.8709673 | No |
| 15297 | HMDB0049905 | TG(18:1(9Z)/18:1(9Z)/24:1(15Z))             | C63H116O6 | 967.8709673 | No |
| 15297 | HMDB0049924 | TG(18:1(9Z)/20:1(11Z)/22:1(13Z))            | C63H116O6 | 967.8709673 | No |
| 15297 | HMDB0049962 | TG(18:1(9Z)/22:1(13Z)/20:1(11Z))            | C63H116O6 | 967.8709673 | No |
| 15297 | HMDB0049981 | TG(18:1(9Z)/24:1(15Z)/18:1(9Z))             | C63H116O6 | 967.8709673 | No |
| 15297 | HMDB0050366 | TG(20:1(11Z)/18:0/22:2(13Z,16Z))            | C63H116O6 | 967.8709673 | No |
| 15297 | HMDB0050382 | TG(20:1(11Z)/20:0/20:2n6)                   | C63H116O6 | 967.8709673 | No |
| 15297 | HMDB0050399 | TG(20:1(11Z)/22:0/18:2(9Z,12Z))             | C63H116O6 | 967.8709673 | No |
| 15297 | HMDB0050455 | TG(20:1(11Z)/16:1(9Z)/24:1(15Z))            | C63H116O6 | 967.8709673 | No |
| 15297 | HMDB0050473 | TG(20:1(11Z)/18:1(11Z)/22:1(13Z))           | C63H116O6 | 967.8709673 | No |
| 15297 | HMDB0050492 | TG(20:1(11Z)/18:1(9Z)/22:1(13Z))            | C63H116O6 | 967.8709673 | No |
| 15297 | HMDB0051449 | TG(22:1(13Z)/16:0/22:2(13Z,16Z))            | C63H116O6 | 967.8709673 | No |
| 15297 | HMDB0051463 | TG(22:1(13Z)/18:0/20:2n6)                   | C63H116O6 | 967.8709673 | No |
| 15297 | HMDB0051478 | TG(22:1(13Z)/20:0/18:2(9Z,12Z))             | C63H116O6 | 967.8709673 | No |
| 15297 | HMDB0051528 | TG(22:1(13Z)/14:1(9Z)/24:1(15Z))            | C63H116O6 | 967.8709673 | No |
| 15297 | HMDB0051544 | TG(22:1(13Z)/16:1(9Z)/22:1(13Z))            | C63H116O6 | 967.8709673 | No |
| 15297 | HMDB0051923 | TG(24:1(15Z)/14:0/22:2(13Z,16Z))            | C63H116O6 | 967.8709673 | No |
| 15297 | HMDB0051952 | TG(24:1(15Z)/16:0/20:2n6)                   | C63H116O6 | 967.8709673 | No |
| 15297 | HMDB0051966 | TG(24:1(15Z)/18:0/18:2(9Z,12Z))             | C63H116O6 | 967.8709673 | No |
| 15350 | HMDB0005181 | Dolichol-14                                 | C70H114O  | 969.8804122 | No |
| 15409 | HMDB0044023 | TG(16:0/24:0/22:6(4Z,7Z,10Z,13Z,16Z,19Z))   | C65H114O6 | 989.8525339 | No |
| 15409 | HMDB0044241 | TG(16:0/24:1(15Z)/22:5(4Z,7Z,10Z,13Z,16Z))  | C65H114O6 | 989.8525339 | No |
| 15409 | HMDB0044246 | TG(16:0/24:1(15Z)/22:5(7Z,10Z,13Z,16Z,19Z)) | C65H114O6 | 989.8525339 | No |
| 15409 | HMDB0044457 | TG(16:0/22:5(4Z,7Z,10Z,13Z,16Z)/24:1(15Z))  | C65H114O6 | 989.8525339 | No |

|       |             |                                             |           |             |    |
|-------|-------------|---------------------------------------------|-----------|-------------|----|
| 15409 | HMDB0044597 | TG(16:0/22:5(7Z,10Z,13Z,16Z,19Z)/24:1(15Z)) | C65H114O6 | 989.8525339 | No |
| 15409 | HMDB0044617 | TG(16:0/22:6(4Z,7Z,10Z,13Z,16Z,19Z)/24:0)   | C65H114O6 | 989.8525339 | No |
| 15409 | HMDB0044828 | TG(18:0/22:0/22:6(4Z,7Z,10Z,13Z,16Z,19Z))   | C65H114O6 | 989.8525339 | No |
| 15409 | HMDB0045038 | TG(18:0/22:1(13Z)/22:5(4Z,7Z,10Z,13Z,16Z))  | C65H114O6 | 989.8525339 | No |
| 15409 | HMDB0045043 | TG(18:0/22:1(13Z)/22:5(7Z,10Z,13Z,16Z,19Z)) | C65H114O6 | 989.8525339 | No |
| 15409 | HMDB0045069 | TG(18:0/24:1(15Z)/20:5(5Z,8Z,11Z,14Z,17Z))  | C65H114O6 | 989.8525339 | No |
| 15409 | HMDB0045226 | TG(18:0/22:2(13Z,16Z)/22:4(7Z,10Z,13Z,16Z)) | C65H114O6 | 989.8525339 | No |
| 15409 | HMDB0045252 | TG(18:0/22:4(7Z,10Z,13Z,16Z)/22:2(13Z,16Z)) | C65H114O6 | 989.8525339 | No |
| 15409 | HMDB0045272 | TG(18:0/22:5(4Z,7Z,10Z,13Z,16Z)/22:1(13Z))  | C65H114O6 | 989.8525339 | No |
| 15409 | HMDB0045381 | TG(18:0/20:5(5Z,8Z,11Z,14Z,17Z)/24:1(15Z))  | C65H114O6 | 989.8525339 | No |
| 15409 | HMDB0045407 | TG(18:0/22:5(7Z,10Z,13Z,16Z,19Z)/22:1(13Z)) | C65H114O6 | 989.8525339 | No |
| 15409 | HMDB0045426 | TG(18:0/22:6(4Z,7Z,10Z,13Z,16Z,19Z)/22:0)   | C65H114O6 | 989.8525339 | No |
| 15409 | HMDB0045605 | TG(20:0/20:0/22:6(4Z,7Z,10Z,13Z,16Z,19Z))   | C65H114O6 | 989.8525339 | No |
| 15409 | HMDB0045781 | TG(20:0/20:1(11Z)/22:5(4Z,7Z,10Z,13Z,16Z))  | C65H114O6 | 989.8525339 | No |
| 15409 | HMDB0045786 | TG(20:0/20:1(11Z)/22:5(7Z,10Z,13Z,16Z,19Z)) | C65H114O6 | 989.8525339 | No |
| 15409 | HMDB0045837 | TG(20:0/22:1(13Z)/20:5(5Z,8Z,11Z,14Z,17Z))  | C65H114O6 | 989.8525339 | No |
| 15409 | HMDB0045936 | TG(20:0/20:2n6/22:4(7Z,10Z,13Z,16Z))        | C65H114O6 | 989.8525339 | No |
| 15409 | HMDB0045987 | TG(20:0/20:4(5Z,8Z,11Z,14Z)/22:2(13Z,16Z))  | C65H114O6 | 989.8525339 | No |
| 15409 | HMDB0046012 | TG(20:0/22:2(13Z,16Z)/20:4(5Z,8Z,11Z,14Z))  | C65H114O6 | 989.8525339 | No |
| 15409 | HMDB0046018 | TG(20:0/22:2(13Z,16Z)/20:4(8Z,11Z,14Z,17Z)) | C65H114O6 | 989.8525339 | No |
| 15409 | HMDB0046036 | TG(20:0/22:4(7Z,10Z,13Z,16Z)/20:2n6)        | C65H114O6 | 989.8525339 | No |
| 15409 | HMDB0046056 | TG(20:0/22:5(4Z,7Z,10Z,13Z,16Z)/20:1(11Z))  | C65H114O6 | 989.8525339 | No |
| 15409 | HMDB0046143 | TG(20:0/20:4(8Z,11Z,14Z,17Z)/22:2(13Z,16Z)) | C65H114O6 | 989.8525339 | No |
| 15409 | HMDB0046162 | TG(20:0/20:5(5Z,8Z,11Z,14Z,17Z)/22:1(13Z))  | C65H114O6 | 989.8525339 | No |
| 15409 | HMDB0046186 | TG(20:0/22:5(7Z,10Z,13Z,16Z,19Z)/20:1(11Z)) | C65H114O6 | 989.8525339 | No |
| 15409 | HMDB0046205 | TG(20:0/22:6(4Z,7Z,10Z,13Z,16Z,19Z)/20:0)   | C65H114O6 | 989.8525339 | No |
| 15409 | HMDB0046354 | TG(22:0/18:0/22:6(4Z,7Z,10Z,13Z,16Z,19Z))   | C65H114O6 | 989.8525339 | No |
| 15409 | HMDB0046498 | TG(22:0/18:1(11Z)/22:5(4Z,7Z,10Z,13Z,16Z))  | C65H114O6 | 989.8525339 | No |
| 15409 | HMDB0046503 | TG(22:0/18:1(11Z)/22:5(7Z,10Z,13Z,16Z,19Z)) | C65H114O6 | 989.8525339 | No |
| 15409 | HMDB0046523 | TG(22:0/18:1(9Z)/22:5(4Z,7Z,10Z,13Z,16Z))   | C65H114O6 | 989.8525339 | No |
| 15409 | HMDB0046528 | TG(22:0/18:1(9Z)/22:5(7Z,10Z,13Z,16Z,19Z))  | C65H114O6 | 989.8525339 | No |
| 15409 | HMDB0046552 | TG(22:0/20:1(11Z)/20:5(5Z,8Z,11Z,14Z,17Z))  | C65H114O6 | 989.8525339 | No |
| 15409 | HMDB0046563 | TG(22:0/20:3(5Z,8Z,11Z)/20:3(5Z,8Z,11Z))    | C65H114O6 | 989.8525339 | No |
| 15409 | HMDB0046569 | TG(22:0/20:3(5Z,8Z,11Z)/20:3n6)             | C65H114O6 | 989.8525339 | No |
| 15409 | HMDB0046647 | TG(22:0/18:2(9Z,12Z)/22:4(7Z,10Z,13Z,16Z))  | C65H114O6 | 989.8525339 | No |
| 15409 | HMDB0046695 | TG(22:0/20:2n6/20:4(5Z,8Z,11Z,14Z))         | C65H114O6 | 989.8525339 | No |
| 15409 | HMDB0046701 | TG(22:0/20:2n6/20:4(8Z,11Z,14Z,17Z))        | C65H114O6 | 989.8525339 | No |
| 15409 | HMDB0046713 | TG(22:0/20:3n6/20:3(5Z,8Z,11Z))             | C65H114O6 | 989.8525339 | No |
| 15409 | HMDB0046719 | TG(22:0/20:3n6/20:3n6)                      | C65H114O6 | 989.8525339 | No |
| 15409 | HMDB0046743 | TG(22:0/20:4(5Z,8Z,11Z,14Z)/20:2n6)         | C65H114O6 | 989.8525339 | No |
| 15409 | HMDB0046775 | TG(22:0/22:2(13Z,16Z)/18:4(6Z,9Z,12Z,15Z))  | C65H114O6 | 989.8525339 | No |
| 15409 | HMDB0046791 | TG(22:0/22:4(7Z,10Z,13Z,16Z)/18:2(9Z,12Z))  | C65H114O6 | 989.8525339 | No |
| 15409 | HMDB0046810 | TG(22:0/22:5(4Z,7Z,10Z,13Z,16Z)/18:1(11Z))  | C65H114O6 | 989.8525339 | No |
| 15409 | HMDB0046811 | TG(22:0/22:5(4Z,7Z,10Z,13Z,16Z)/18:1(9Z))   | C65H114O6 | 989.8525339 | No |
| 15409 | HMDB0046871 | TG(22:0/18:4(6Z,9Z,12Z,15Z)/22:2(13Z,16Z))  | C65H114O6 | 989.8525339 | No |
| 15409 | HMDB0046893 | TG(22:0/20:4(8Z,11Z,14Z,17Z)/20:2n6)        | C65H114O6 | 989.8525339 | No |
| 15409 | HMDB0046912 | TG(22:0/20:5(5Z,8Z,11Z,14Z,17Z)/20:1(11Z))  | C65H114O6 | 989.8525339 | No |
| 15409 | HMDB0046935 | TG(22:0/22:5(7Z,10Z,13Z,16Z,19Z)/18:1(11Z)) | C65H114O6 | 989.8525339 | No |
| 15409 | HMDB0046936 | TG(22:0/22:5(7Z,10Z,13Z,16Z,19Z)/18:1(9Z))  | C65H114O6 | 989.8525339 | No |
| 15409 | HMDB0047075 | TG(24:0/16:0/22:6(4Z,7Z,10Z,13Z,16Z,19Z))   | C65H114O6 | 989.8525339 | No |
| 15409 | HMDB0047213 | TG(24:0/16:1(9Z)/22:5(4Z,7Z,10Z,13Z,16Z))   | C65H114O6 | 989.8525339 | No |
| 15409 | HMDB0047218 | TG(24:0/16:1(9Z)/22:5(7Z,10Z,13Z,16Z,19Z))  | C65H114O6 | 989.8525339 | No |
| 15409 | HMDB0047241 | TG(24:0/18:1(11Z)/20:5(5Z,8Z,11Z,14Z,17Z))  | C65H114O6 | 989.8525339 | No |
| 15409 | HMDB0047265 | TG(24:0/18:1(9Z)/20:5(5Z,8Z,11Z,14Z,17Z))   | C65H114O6 | 989.8525339 | No |
| 15409 | HMDB0047303 | TG(24:0/20:3(5Z,8Z,11Z)/18:3(6Z,9Z,12Z))    | C65H114O6 | 989.8525339 | No |
| 15409 | HMDB0047310 | TG(24:0/20:3(5Z,8Z,11Z)/18:3(9Z,12Z,15Z))   | C65H114O6 | 989.8525339 | No |
| 15409 | HMDB0047378 | TG(24:0/18:2(9Z,12Z)/20:4(5Z,8Z,11Z,14Z))   | C65H114O6 | 989.8525339 | No |
| 15409 | HMDB0047384 | TG(24:0/18:2(9Z,12Z)/20:4(8Z,11Z,14Z,17Z))  | C65H114O6 | 989.8525339 | No |
| 15409 | HMDB0047395 | TG(24:0/18:3(6Z,9Z,12Z)/20:3(5Z,8Z,11Z))    | C65H114O6 | 989.8525339 | No |
| 15409 | HMDB0047401 | TG(24:0/18:3(6Z,9Z,12Z)/20:3n6)             | C65H114O6 | 989.8525339 | No |
| 15409 | HMDB0047431 | TG(24:0/20:2n6/18:4(6Z,9Z,12Z,15Z))         | C65H114O6 | 989.8525339 | No |

|       |             |                                              |           |             |    |
|-------|-------------|----------------------------------------------|-----------|-------------|----|
| 15409 | HMDB0047447 | TG(24:0/20:3n6/18:3(6Z,9Z,12Z))              | C65H114O6 | 989.8525339 | No |
| 15409 | HMDB0047454 | TG(24:0/20:3n6/18:3(9Z,12Z,15Z))             | C65H114O6 | 989.8525339 | No |
| 15409 | HMDB0047470 | TG(24:0/20:4(5Z,8Z,11Z,14Z)/18:2(9Z,12Z))    | C65H114O6 | 989.8525339 | No |
| 15409 | HMDB0047535 | TG(24:0/22:5(4Z,7Z,10Z,13Z,16Z)/16:1(9Z))    | C65H114O6 | 989.8525339 | No |
| 15409 | HMDB0047563 | TG(24:0/18:3(9Z,12Z,15Z)/20:3(5Z,8Z,11Z))    | C65H114O6 | 989.8525339 | No |
| 15409 | HMDB0047569 | TG(24:0/18:3(9Z,12Z,15Z)/20:3n6)             | C65H114O6 | 989.8525339 | No |
| 15409 | HMDB0047592 | TG(24:0/18:4(6Z,9Z,12Z,15Z)/20:2n6)          | C65H114O6 | 989.8525339 | No |
| 15409 | HMDB0047614 | TG(24:0/20:4(8Z,11Z,14Z,17Z)/18:2(9Z,12Z))   | C65H114O6 | 989.8525339 | No |
| 15409 | HMDB0047632 | TG(24:0/20:5(5Z,8Z,11Z,14Z,17Z)/18:1(11Z))   | C65H114O6 | 989.8525339 | No |
| 15409 | HMDB0047633 | TG(24:0/20:5(5Z,8Z,11Z,14Z,17Z)/18:1(9Z))    | C65H114O6 | 989.8525339 | No |
| 15409 | HMDB0047655 | TG(24:0/22:5(7Z,10Z,13Z,16Z,19Z)/16:1(9Z))   | C65H114O6 | 989.8525339 | No |
| 15409 | HMDB0048559 | TG(16:1(9Z)/24:0/22:5(4Z,7Z,10Z,13Z,16Z))    | C65H114O6 | 989.8525339 | No |
| 15409 | HMDB0048564 | TG(16:1(9Z)/24:0/22:5(7Z,10Z,13Z,16Z,19Z))   | C65H114O6 | 989.8525339 | No |
| 15409 | HMDB0048734 | TG(16:1(9Z)/24:1(15Z)/22:4(7Z,10Z,13Z,16Z))  | C65H114O6 | 989.8525339 | No |
| 15409 | HMDB0048881 | TG(16:1(9Z)/22:4(7Z,10Z,13Z,16Z)/24:1(15Z))  | C65H114O6 | 989.8525339 | No |
| 15409 | HMDB0049190 | TG(18:1(11Z)/22:0/22:5(4Z,7Z,10Z,13Z,16Z))   | C65H114O6 | 989.8525339 | No |
| 15409 | HMDB0049195 | TG(18:1(11Z)/22:0/22:5(7Z,10Z,13Z,16Z,19Z))  | C65H114O6 | 989.8525339 | No |
| 15409 | HMDB0049215 | TG(18:1(11Z)/24:0/20:5(5Z,8Z,11Z,14Z,17Z))   | C65H114O6 | 989.8525339 | No |
| 15409 | HMDB0049357 | TG(18:1(11Z)/22:1(13Z)/22:4(7Z,10Z,13Z,16Z)) | C65H114O6 | 989.8525339 | No |
| 15409 | HMDB0049376 | TG(18:1(11Z)/24:1(15Z)/20:4(5Z,8Z,11Z,14Z))  | C65H114O6 | 989.8525339 | No |
| 15409 | HMDB0049382 | TG(18:1(11Z)/24:1(15Z)/20:4(8Z,11Z,14Z,17Z)) | C65H114O6 | 989.8525339 | No |
| 15409 | HMDB0049476 | TG(18:1(11Z)/20:4(5Z,8Z,11Z,14Z)/24:1(15Z))  | C65H114O6 | 989.8525339 | No |
| 15409 | HMDB0049517 | TG(18:1(11Z)/22:4(7Z,10Z,13Z,16Z)/22:1(13Z)) | C65H114O6 | 989.8525339 | No |
| 15409 | HMDB0049602 | TG(18:1(11Z)/20:4(8Z,11Z,14Z,17Z)/24:1(15Z)) | C65H114O6 | 989.8525339 | No |
| 15409 | HMDB0049813 | TG(18:1(9Z)/22:0/22:5(4Z,7Z,10Z,13Z,16Z))    | C65H114O6 | 989.8525339 | No |
| 15409 | HMDB0049818 | TG(18:1(9Z)/22:0/22:5(7Z,10Z,13Z,16Z,19Z))   | C65H114O6 | 989.8525339 | No |
| 15409 | HMDB0049837 | TG(18:1(9Z)/24:0/20:5(5Z,8Z,11Z,14Z,17Z))    | C65H114O6 | 989.8525339 | No |
| 15409 | HMDB0049972 | TG(18:1(9Z)/22:1(13Z)/22:4(7Z,10Z,13Z,16Z))  | C65H114O6 | 989.8525339 | No |
| 15409 | HMDB0049990 | TG(18:1(9Z)/24:1(15Z)/20:4(5Z,8Z,11Z,14Z))   | C65H114O6 | 989.8525339 | No |
| 15409 | HMDB0049996 | TG(18:1(9Z)/24:1(15Z)/20:4(8Z,11Z,14Z,17Z))  | C65H114O6 | 989.8525339 | No |
| 15409 | HMDB0050085 | TG(18:1(9Z)/20:4(5Z,8Z,11Z,14Z)/24:1(15Z))   | C65H114O6 | 989.8525339 | No |
| 15409 | HMDB0050124 | TG(18:1(9Z)/22:4(7Z,10Z,13Z,16Z)/22:1(13Z))  | C65H114O6 | 989.8525339 | No |
| 15409 | HMDB0050205 | TG(18:1(9Z)/20:4(8Z,11Z,14Z,17Z)/24:1(15Z))  | C65H114O6 | 989.8525339 | No |
| 15409 | HMDB0050387 | TG(20:1(11Z)/20:0/22:5(4Z,7Z,10Z,13Z,16Z))   | C65H114O6 | 989.8525339 | No |
| 15409 | HMDB0050392 | TG(20:1(11Z)/20:0/22:5(7Z,10Z,13Z,16Z,19Z))  | C65H114O6 | 989.8525339 | No |
| 15409 | HMDB0050410 | TG(20:1(11Z)/22:0/20:5(5Z,8Z,11Z,14Z,17Z))   | C65H114O6 | 989.8525339 | No |
| 15409 | HMDB0050519 | TG(20:1(11Z)/20:1(11Z)/22:4(7Z,10Z,13Z,16Z)) | C65H114O6 | 989.8525339 | No |
| 15409 | HMDB0050537 | TG(20:1(11Z)/20:3(5Z,8Z,11Z)/22:2(13Z,16Z))  | C65H114O6 | 989.8525339 | No |
| 15409 | HMDB0050555 | TG(20:1(11Z)/22:1(13Z)/20:4(5Z,8Z,11Z,14Z))  | C65H114O6 | 989.8525339 | No |
| 15409 | HMDB0050561 | TG(20:1(11Z)/22:1(13Z)/20:4(8Z,11Z,14Z,17Z)) | C65H114O6 | 989.8525339 | No |
| 15409 | HMDB0050579 | TG(20:1(11Z)/24:1(15Z)/18:4(6Z,9Z,12Z,15Z))  | C65H114O6 | 989.8525339 | No |
| 15409 | HMDB0050651 | TG(20:1(11Z)/20:3n6/22:2(13Z,16Z))           | C65H114O6 | 989.8525339 | No |
| 15409 | HMDB0050663 | TG(20:1(11Z)/20:4(5Z,8Z,11Z,14Z)/22:1(13Z))  | C65H114O6 | 989.8525339 | No |
| 15409 | HMDB0050681 | TG(20:1(11Z)/22:2(13Z,16Z)/20:3(5Z,8Z,11Z))  | C65H114O6 | 989.8525339 | No |
| 15409 | HMDB0050687 | TG(20:1(11Z)/22:2(13Z,16Z)/20:3n6)           | C65H114O6 | 989.8525339 | No |
| 15409 | HMDB0050699 | TG(20:1(11Z)/22:4(7Z,10Z,13Z,16Z)/20:1(11Z)) | C65H114O6 | 989.8525339 | No |
| 15409 | HMDB0050759 | TG(20:1(11Z)/18:4(6Z,9Z,12Z,15Z)/24:1(15Z))  | C65H114O6 | 989.8525339 | No |
| 15409 | HMDB0050777 | TG(20:1(11Z)/20:4(8Z,11Z,14Z,17Z)/22:1(13Z)) | C65H114O6 | 989.8525339 | No |
| 15409 | HMDB0050959 | TG(20:3(5Z,8Z,11Z)/22:0/20:3(5Z,8Z,11Z))     | C65H114O6 | 989.8525339 | No |
| 15409 | HMDB0050965 | TG(20:3(5Z,8Z,11Z)/22:0/20:3n6)              | C65H114O6 | 989.8525339 | No |
| 15409 | HMDB0050981 | TG(20:3(5Z,8Z,11Z)/24:0/18:3(6Z,9Z,12Z))     | C65H114O6 | 989.8525339 | No |
| 15409 | HMDB0050988 | TG(20:3(5Z,8Z,11Z)/24:0/18:3(9Z,12Z,15Z))    | C65H114O6 | 989.8525339 | No |
| 15409 | HMDB0051075 | TG(20:3(5Z,8Z,11Z)/20:1(11Z)/22:2(13Z,16Z))  | C65H114O6 | 989.8525339 | No |
| 15409 | HMDB0051108 | TG(20:3(5Z,8Z,11Z)/22:1(13Z)/20:2n6)         | C65H114O6 | 989.8525339 | No |
| 15409 | HMDB0051124 | TG(20:3(5Z,8Z,11Z)/24:1(15Z)/18:2(9Z,12Z))   | C65H114O6 | 989.8525339 | No |
| 15409 | HMDB0051141 | TG(20:3(5Z,8Z,11Z)/18:2(9Z,12Z)/24:1(15Z))   | C65H114O6 | 989.8525339 | No |
| 15409 | HMDB0051176 | TG(20:3(5Z,8Z,11Z)/20:2n6/22:1(13Z))         | C65H114O6 | 989.8525339 | No |
| 15409 | HMDB0051468 | TG(22:1(13Z)/18:0/22:5(4Z,7Z,10Z,13Z,16Z))   | C65H114O6 | 989.8525339 | No |
| 15409 | HMDB0051473 | TG(22:1(13Z)/18:0/22:5(7Z,10Z,13Z,16Z,19Z))  | C65H114O6 | 989.8525339 | No |
| 15409 | HMDB0051489 | TG(22:1(13Z)/20:0/20:5(5Z,8Z,11Z,14Z,17Z))   | C65H114O6 | 989.8525339 | No |
| 15409 | HMDB0051569 | TG(22:1(13Z)/18:1(11Z)/22:4(7Z,10Z,13Z,16Z)) | C65H114O6 | 989.8525339 | No |

|       |             |                                              |           |             |    |
|-------|-------------|----------------------------------------------|-----------|-------------|----|
| 15409 | HMDB0051586 | TG(22:1(13Z)/18:1(9Z)/22:4(7Z,10Z,13Z,16Z))  | C65H11406 | 989.8525339 | No |
| 15409 | HMDB0051601 | TG(22:1(13Z)/20:1(11Z)/20:4(5Z,8Z,11Z,14Z))  | C65H11406 | 989.8525339 | No |
| 15409 | HMDB0051607 | TG(22:1(13Z)/20:1(11Z)/20:4(8Z,11Z,14Z,17Z)) | C65H11406 | 989.8525339 | No |
| 15409 | HMDB0051616 | TG(22:1(13Z)/20:3(5Z,8Z,11Z)/20:2n6)         | C65H11406 | 989.8525339 | No |
| 15409 | HMDB0051640 | TG(22:1(13Z)/22:1(13Z)/18:4(6Z,9Z,12Z,15Z))  | C65H11406 | 989.8525339 | No |
| 15409 | HMDB0051687 | TG(22:1(13Z)/18:3(6Z,9Z,12Z)/22:2(13Z,16Z))  | C65H11406 | 989.8525339 | No |
| 15409 | HMDB0051702 | TG(22:1(13Z)/20:2n6/20:3n6)                  | C65H11406 | 989.8525339 | No |
| 15409 | HMDB0051718 | TG(22:1(13Z)/20:3n6/20:2n6)                  | C65H11406 | 989.8525339 | No |
| 15409 | HMDB0051751 | TG(22:1(13Z)/22:2(13Z,16Z)/18:3(6Z,9Z,12Z))  | C65H11406 | 989.8525339 | No |
| 15409 | HMDB0051758 | TG(22:1(13Z)/22:2(13Z,16Z)/18:3(9Z,12Z,15Z)) | C65H11406 | 989.8525339 | No |
| 15409 | HMDB0051806 | TG(22:1(13Z)/18:3(9Z,12Z,15Z)/22:2(13Z,16Z)) | C65H11406 | 989.8525339 | No |
| 15409 | HMDB0051816 | TG(22:1(13Z)/18:4(6Z,9Z,12Z,15Z)/22:1(13Z))  | C65H11406 | 989.8525339 | No |
| 15409 | HMDB0051957 | TG(24:1(15Z)/16:0/22:5(4Z,7Z,10Z,13Z,16Z))   | C65H11406 | 989.8525339 | No |
| 15409 | HMDB0051962 | TG(24:1(15Z)/16:0/22:5(7Z,10Z,13Z,16Z,19Z))  | C65H11406 | 989.8525339 | No |
| 15409 | HMDB0051977 | TG(24:1(15Z)/18:0/20:5(5Z,8Z,11Z,14Z,17Z))   | C65H11406 | 989.8525339 | No |
| 15409 | HMDB0052052 | TG(24:1(15Z)/16:1(9Z)/22:4(7Z,10Z,13Z,16Z))  | C65H11406 | 989.8525339 | No |
| 15409 | HMDB0052066 | TG(24:1(15Z)/18:1(11Z)/20:4(5Z,8Z,11Z,14Z))  | C65H11406 | 989.8525339 | No |
| 15409 | HMDB0052072 | TG(24:1(15Z)/18:1(11Z)/20:4(8Z,11Z,14Z,17Z)) | C65H11406 | 989.8525339 | No |
| 15409 | HMDB0052082 | TG(24:1(15Z)/18:1(9Z)/20:4(5Z,8Z,11Z,14Z))   | C65H11406 | 989.8525339 | No |
| 15409 | HMDB0052088 | TG(24:1(15Z)/18:1(9Z)/20:4(8Z,11Z,14Z,17Z))  | C65H11406 | 989.8525339 | No |
| 15409 | HMDB0052103 | TG(24:1(15Z)/20:1(11Z)/18:4(6Z,9Z,12Z,15Z))  | C65H11406 | 989.8525339 | No |
| 15409 | HMDB0052110 | TG(24:1(15Z)/20:3(5Z,8Z,11Z)/18:2(9Z,12Z))   | C65H11406 | 989.8525339 | No |
| 15409 | HMDB0052161 | TG(24:1(15Z)/18:2(9Z,12Z)/20:3n6)            | C65H11406 | 989.8525339 | No |
| 15409 | HMDB0052176 | TG(24:1(15Z)/18:3(6Z,9Z,12Z)/20:2n6)         | C65H11406 | 989.8525339 | No |
| 15409 | HMDB0052191 | TG(24:1(15Z)/20:2n6/18:3(6Z,9Z,12Z))         | C65H11406 | 989.8525339 | No |
| 15409 | HMDB0052198 | TG(24:1(15Z)/20:2n6/18:3(9Z,12Z,15Z))        | C65H11406 | 989.8525339 | No |
| 15409 | HMDB0052206 | TG(24:1(15Z)/20:3n6/18:2(9Z,12Z))            | C65H11406 | 989.8525339 | No |
| 15409 | HMDB0052288 | TG(24:1(15Z)/18:3(9Z,12Z,15Z)/20:2n6)        | C65H11406 | 989.8525339 | No |
| 15409 | HMDB0052477 | TG(18:2(9Z,12Z)/22:0/22:4(7Z,10Z,13Z,16Z))   | C65H11406 | 989.8525339 | No |
| 15409 | HMDB0052490 | TG(18:2(9Z,12Z)/24:0/20:4(5Z,8Z,11Z,14Z))    | C65H11406 | 989.8525339 | No |
| 15409 | HMDB0052496 | TG(18:2(9Z,12Z)/24:0/20:4(8Z,11Z,14Z,17Z))   | C65H11406 | 989.8525339 | No |
| 15409 | HMDB0052609 | TG(18:2(9Z,12Z)/24:1(15Z)/20:3n6)            | C65H11406 | 989.8525339 | No |
| 15409 | HMDB0052701 | TG(18:2(9Z,12Z)/22:2(13Z,16Z)/22:2(13Z,16Z)) | C65H11406 | 989.8525339 | No |
| 15409 | HMDB0052931 | TG(18:3(6Z,9Z,12Z)/24:0/20:3n6)              | C65H11406 | 989.8525339 | No |
| 15409 | HMDB0053031 | TG(18:3(6Z,9Z,12Z)/22:1(13Z)/22:2(13Z,16Z))  | C65H11406 | 989.8525339 | No |
| 15409 | HMDB0053042 | TG(18:3(6Z,9Z,12Z)/24:1(15Z)/20:2n6)         | C65H11406 | 989.8525339 | No |
| 15409 | HMDB0053320 | TG(20:2n6/20:0/22:4(7Z,10Z,13Z,16Z))         | C65H11406 | 989.8525339 | No |
| 15409 | HMDB0053331 | TG(20:2n6/22:0/20:4(5Z,8Z,11Z,14Z))          | C65H11406 | 989.8525339 | No |
| 15409 | HMDB0053337 | TG(20:2n6/22:0/20:4(8Z,11Z,14Z,17Z))         | C65H11406 | 989.8525339 | No |
| 15409 | HMDB0053349 | TG(20:2n6/24:0/18:4(6Z,9Z,12Z,15Z))          | C65H11406 | 989.8525339 | No |
| 15409 | HMDB0053434 | TG(20:2n6/22:1(13Z)/20:3n6)                  | C65H11406 | 989.8525339 | No |
| 15409 | HMDB0053452 | TG(20:2n6/24:1(15Z)/18:3(9Z,12Z,15Z))        | C65H11406 | 989.8525339 | No |
| 15409 | HMDB0053488 | TG(20:2n6/20:2n6/22:2(13Z,16Z))              | C65H11406 | 989.8525339 | No |
| 15409 | HMDB0053524 | TG(20:2n6/22:2(13Z,16Z)/20:2n6)              | C65H11406 | 989.8525339 | No |
| 15409 | HMDB0053713 | TG(20:3n6/22:0/20:3n6)                       | C65H11406 | 989.8525339 | No |
| 15409 | HMDB0053730 | TG(20:3n6/24:0/18:3(9Z,12Z,15Z))             | C65H11406 | 989.8525339 | No |
| 15409 | HMDB0053787 | TG(20:3n6/20:1(11Z)/22:2(13Z,16Z))           | C65H11406 | 989.8525339 | No |
| 15409 | HMDB0054057 | TG(20:4(5Z,8Z,11Z,14Z)/20:0/22:2(13Z,16Z))   | C65H11406 | 989.8525339 | No |
| 15409 | HMDB0054372 | TG(22:2(13Z,16Z)/18:0/22:4(7Z,10Z,13Z,16Z))  | C65H11406 | 989.8525339 | No |
| 15409 | HMDB0054386 | TG(22:2(13Z,16Z)/20:0/20:4(8Z,11Z,14Z,17Z))  | C65H11406 | 989.8525339 | No |
| 15409 | HMDB0054395 | TG(22:2(13Z,16Z)/22:0/18:4(6Z,9Z,12Z,15Z))   | C65H11406 | 989.8525339 | No |
| 15409 | HMDB0054474 | TG(22:2(13Z,16Z)/22:1(13Z)/18:3(9Z,12Z,15Z)) | C65H11406 | 989.8525339 | No |
| 15409 | HMDB0054491 | TG(22:2(13Z,16Z)/18:2(9Z,12Z)/22:2(13Z,16Z)) | C65H11406 | 989.8525339 | No |
